# Supplementary material for: Macrophages and pulmonary fibrosis: a bibliometric and visual analysis of publications from 1990 to 2023
Source: Front Med (Lausanne). 2024 Jun 17;11:1374177. doi: 10.3389/fmed.2024.1374177 (PMC11215139; doi:10.3389/fmed.2024.1374177)
Supplement: Supplementary file 1 [file Table_1.XLSX]

## Sheet: Sheet1
	Year	Number of publications per year	Comulative publications
	1990	6	6
	1991	74	80
	1992	73	153
	1993	76	229
	1994	96	325
	1995	107	432
	1996	98	530
	1997	93	623
	1998	104	727
	1999	65	792
	2000	79	871
	2001	80	951
	2002	67	1018
	2003	71	1089
	2004	71	1160
	2005	73	1233
	2006	57	1290
	2007	85	1375
	2008	63	1438
	2009	82	1520
	2010	90	1610
	2011	93	1703
	2012	88	1791
	2013	101	1892
	2014	117	2009
	2015	103	2112
	2016	108	2220
	2017	147	2367
	2018	143	2510
	2019	149	2659
	2020	203	2862
	2021	231	3093
	2022	242	3335
	2023	144	3479
