# Supplementary material for: Macrophages and pulmonary fibrosis: a bibliometric and visual analysis of publications from 1990 to 2023
Source: Front Med (Lausanne). 2024 Jun 17;11:1374177. doi: 10.3389/fmed.2024.1374177 (PMC11215139; doi:10.3389/fmed.2024.1374177)
Supplement: Supplementary file 2 [file Table_2.XLS]

## Sheet: map
Country/region ID	Country	Number of publications	x	y	cluster	weight<Links>	weight<Total link strength>	weight<Norm. citations>	weight<Citations>	score<Avg. norm. citations>	score<Avg. pub. year>	score<Avg. citations>
67	Usa	1297	-101.56	39.91	3	29	471	1790.77	90589	1.3807	2008.79	69.845
12	China	601	116.2	39.55	3	24	178	500.885	12634	0.8334	2018.55	21.0216
35	Japan	471	141.15	39.7	5	19	108	353.316	16856	0.7501	2009.19	35.7877
23	Germany	256	13.25	52.3	1	26	234	334.842	15392	1.308	2009.26	60.125
66	United Kingdom	191	-0.05	51.36	2	27	189	269.716	11968	1.4121	2008.85	62.6597
34	Italy	175	12.29	41.54	1	24	141	171.331	7515	0.979	2010.51	42.9429
21	France	158	2.2	48.5	1	23	128	178.141	7638	1.1275	2008.3	48.3418
10	Canada	121	-75.42	56	4	23	109	154.522	7607	1.277	2007.53	62.8678
58	South Korea	96	126.58	37.31	3	6	29	55.8136	1990	0.5814	2016.25	20.7292
42	Netherlands	73	4.54	52.23	2	22	93	92.4038	3651	1.2658	2011.59	50.0137
61	Switzerland	64	7.28	46.57	1	22	78	94.6328	4213	1.4786	2008.91	65.8281
7	Belgium	62	4.21	50.51	2	22	65	68.3945	3308	1.1031	2009.69	53.3548
2	Australia	57	149.08	-35.15	1	19	57	76.3493	2762	1.3395	2011.49	48.4561
59	Spain	57	-3.45	40.25	1	23	76	50.4671	2102	0.8854	2012.09	36.8772
60	Sweden	55	18.03	59.2	2	20	68	54.2556	2073	0.9865	2009.71	37.6909
8	Brazil	43	16.38	39.48	1	13	36	30.3213	1280	0.7051	2015.05	29.7674
24	Greece	38	23.46	37.58	2	12	35	33.4607	1395	0.8805	2011.74	36.7105
20	Finland	36	25.03	60.15	2	18	42	26.705	1233	0.7418	2009.36	34.25
28	India	33	77.13	28.37	4	6	16	25.9206	1169	0.7855	2012.88	35.4242
41	Mexico	31	-105.58	27.44	3	4	18	29.9258	1528	0.9653	2007.23	49.2903
47	Poland	31	21	52.13	2	9	15	16.2522	634	0.5243	2010.87	20.4516
63	Turkey	31	32.54	39.57	1	14	20	14.9476	636	0.4822	2011.52	20.5161
33	Israel	22	35.12	31.47	1	18	36	16.6407	721	0.7564	2008.09	32.7727
3	Austria	21	16.22	48.12	1	18	42	38.9955	1286	1.8569	2016.76	61.2381
17	Denmark	20	12.34	55.41	2	18	36	27.5413	943	1.3771	2009.8	47.15
30	Iran	18	51.3	35.44	3	4	5	9.2211	240	0.5123	2016.67	13.3333
32	Ireland	15	-6.15	53.21	1	16	28	30.8798	772	2.0587	2011.93	51.4667
18	Egypt	14	31.14	30.01	5	6	6	5.996	275	0.4283	2016.36	19.6429
15	Czech Republic	12	14.22	50.05	4	11	13	7.7361	283	0.6447	2013.25	23.5833
44	Norway	12	10.45	59.55	2	24	39	11.1463	438	0.9289	2011.58	36.5
51	Russia	10	91.5	55.45	2	2	3	1.5543	56	0.1554	2016.1	5.6

## Sheet: net
Country/region ID	Partner country/region ID	Cooperation intensity (relative value)
12	67	83
23	67	50
66	67	45
35	67	44
10	67	40
34	67	26
42	67	21
21	67	19
23	61	19
58	67	19
23	34	18
12	23	16
34	66	15
41	67	15
61	67	15
60	67	14
21	23	13
23	66	13
21	34	12
23	35	12
23	42	12
7	21	11
12	66	11
12	21	10
23	59	10
2	66	9
3	23	9
7	23	9
10	23	9
21	61	9
21	66	9
24	66	9
24	67	9
34	59	9
42	66	9
2	67	8
12	35	8
59	67	8
3	67	7
7	66	7
8	67	7
10	66	7
59	66	7
60	66	7
2	35	6
10	12	6
10	21	6
10	34	6
10	35	6
12	59	6
17	66	6
17	67	6
20	23	6
20	60	6
20	66	6
21	42	6
23	60	6
33	67	6
35	66	6
7	34	5
8	34	5
10	42	5
12	42	5
17	60	5
23	24	5
23	28	5
28	67	5
32	67	5
34	60	5
34	61	5
35	59	5
2	12	4
2	21	4
2	42	4
3	61	4
7	12	4
7	42	4
7	67	4
12	58	4
21	35	4
23	33	4
33	66	4
34	42	4
34	44	4
42	60	4
63	67	4
2	23	3
2	34	3
3	21	3
3	59	3
8	10	3
8	21	3
8	23	3
8	42	3
8	59	3
8	66	3
10	33	3
20	34	3
20	67	3
21	59	3
21	60	3
32	34	3
32	61	3
33	34	3
34	35	3
42	47	3
44	60	3
44	66	3
61	66	3
2	3	2
2	7	2
2	10	2
2	32	2
2	59	2
3	34	2
3	35	2
7	20	2
7	35	2
7	59	2
7	60	2
7	61	2
8	12	2
10	20	2
10	28	2
10	44	2
10	58	2
12	17	2
12	30	2
12	33	2
12	34	2
12	44	2
12	60	2
12	61	2
15	23	2
15	66	2
17	34	2
17	44	2
17	61	2
20	35	2
20	42	2
20	59	2
21	28	2
21	32	2
21	33	2
21	44	2
21	63	2
23	32	2
23	44	2
23	47	2
23	63	2
24	42	2
24	59	2
24	61	2
32	66	2
33	44	2
34	47	2
34	63	2
35	58	2
42	59	2
44	59	2
44	67	2
47	60	2
47	67	2
51	67	2
59	60	2
59	61	2
2	17	1
2	20	1
2	33	1
2	44	1
2	60	1
2	61	1
3	7	1
3	12	1
3	17	1
3	32	1
3	33	1
3	42	1
3	44	1
3	60	1
3	63	1
3	66	1
7	10	1
7	15	1
7	17	1
7	24	1
7	32	1
7	33	1
7	44	1
7	47	1
8	33	1
8	44	1
8	61	1
8	63	1
10	17	1
10	24	1
10	41	1
10	59	1
10	60	1
10	61	1
10	63	1
12	18	1
12	20	1
12	32	1
12	63	1
15	20	1
15	21	1
15	28	1
15	42	1
15	44	1
15	59	1
15	60	1
15	61	1
17	20	1
17	21	1
17	23	1
17	32	1
17	33	1
17	42	1
17	59	1
18	23	1
18	34	1
18	35	1
18	66	1
18	67	1
20	21	1
20	24	1
20	32	1
20	44	1
24	34	1
24	44	1
24	60	1
28	66	1
30	42	1
30	58	1
30	67	1
32	33	1
32	35	1
32	44	1
32	59	1
33	42	1
33	59	1
33	61	1
33	63	1
35	41	1
35	60	1
35	61	1
35	63	1
41	66	1
42	44	1
42	63	1
44	47	1
44	51	1
44	61	1
44	63	1
47	61	1
47	66	1
58	59	1
60	61	1
61	63	1
63	66	1
