# Supplementary material for: Macrophages and pulmonary fibrosis: a bibliometric and visual analysis of publications from 1990 to 2023
Source: Front Med (Lausanne). 2024 Jun 17;11:1374177. doi: 10.3389/fmed.2024.1374177 (PMC11215139; doi:10.3389/fmed.2024.1374177)
Supplement: Supplementary file 3 [file Table_3.XLS]

## Sheet: map
Organization ID	Organization	Number of published papers	x	y	cluster	weight<Links>	weight<Total link strength>	weight<Norm. citations>	weight<Citations>	score<Avg. norm. citations>	score<Avg. pub. year>	score<Avg. citations>
2607	Univ Michigan	107	0.0689	0.1213	2	31	56	169.208	9065	1.5814	2007.21	84.7196
2413	Univ Colorado	52	0.5435	0.0451	3	19	58	76.1595	4032	1.4646	2005.96	77.5385
2680	Univ Pittsburgh	50	-0.0933	-0.1734	1	35	51	72.035	2618	1.4407	2014.3	52.36
1691	Niosh	42	-0.6708	0.5387	4	7	22	37.8255	2283	0.9006	2005.02	54.3571
804	Harvard Univ	41	0.2153	-0.3362	1	29	62	69.1369	3861	1.6863	2008.93	94.1707
2920	Yale Univ	40	-0.0402	-0.4079	2	21	37	98.9933	5061	2.4748	2010	126.525
2345	Univ Alabama Birmingham	38	-0.01	-0.2029	2	14	20	61.0132	2164	1.6056	2016.68	56.9474
2689	Univ Rochester	36	-0.1832	0.5146	2	8	9	45.5148	2230	1.2643	2007.11	61.9444
2546	Univ Iowa	33	0.0755	-0.642	2	9	16	41.4265	2581	1.2553	2005.42	78.2121
2757	Univ Tokyo	32	1.1588	-0.0655	3	8	14	26.6619	1568	0.8332	2008.25	49
1540	Nanjing Med Univ	31	-1.1339	-0.3605	4	7	15	32.3494	840	1.0435	2019.61	27.0968
2390	Univ Calif Los Angeles	31	-0.1301	-0.0504	1	21	27	48.8226	2410	1.5749	2012.1	77.7419
576	Duke Univ	29	0.2673	-0.223	1	13	18	33.6594	1997	1.1607	2006.34	68.8621
300	Cent South Univ	28	-0.7514	-0.3141	4	9	10	27.939	345	0.9978	2021.39	12.3214
963	Huazhong Univ Sci & Technol	28	-0.731	0.051	4	8	15	33.6269	875	1.201	2017.71	31.25
1707	Northwestern Univ	28	0.3377	-0.0692	3	11	14	66.1568	2790	2.3627	2012.36	99.6429
2029	Shanghai Jiao Tong Univ	28	-1.0449	-0.072	4	9	20	28.7187	520	1.0257	2019.29	18.5714
2621	Univ Munich	28	-0.2189	0.307	2	13	21	28.6837	1410	1.0244	2008.61	50.3571
1303	Kyoto Univ	27	0.6022	-0.1629	3	5	5	24.503	1064	0.9075	2008.44	39.4074
1923	Royal Brompton Hosp	27	0.4538	0.5173	1	9	13	41.4806	1778	1.5363	2006.15	65.8519
174	Baylor Coll Med	26	-0.1738	-0.7362	1	12	17	54.1098	2098	2.0811	2012.73	80.6923
1417	Mcmaster Univ	26	0.4315	0.6086	2	9	11	48.3598	2318	1.86	2012.27	89.1538
2672	Univ Penn	26	0.01	-0.284	1	20	30	35.7708	1003	1.3758	2013.35	38.5769
2713	Univ Siena	26	0.517	0.6121	2	5	7	21.629	1198	0.8319	2013.04	46.0769
2789	Univ Washington	26	0.3278	-0.4248	2	12	13	35.4583	1674	1.3638	2006.42	64.3846
268	Capital Med Univ	25	-1.0168	-0.4621	4	6	14	15.6618	354	0.6265	2019.12	14.16
352	China Med Univ	25	-1.0696	0.4366	4	5	8	22.7516	624	0.9101	2017.44	24.96
360	Chinese Acad Sci	25	-1.0433	0.1133	4	13	17	25.7648	601	1.0306	2018.28	24.04
682	Fudan Univ	25	-0.8356	0.0297	4	9	18	19.4499	493	0.778	2018.52	19.72
1174	Johns Hopkins Univ	25	0.202	-0.5169	2	16	24	46.0196	2616	1.8408	2007.44	104.64
2278	Tongji Univ	25	-0.7013	0.1241	4	16	30	28.652	706	1.1461	2019.68	28.24
2392	Univ Calif San Francisco	25	-0.3891	0.0523	1	16	18	64.3156	3174	2.5726	2007.52	126.96
2403	Univ Cincinnati	25	-0.2274	-0.0464	1	12	17	26.1388	1217	1.0456	2011.72	48.68
351	China Japan Friendship Hosp	23	-0.9075	-0.5035	4	7	20	26.2983	404	1.1434	2020.78	17.5652
1526	Nagasaki Univ	23	1.2958	-0.2565	3	7	10	21.6137	1066	0.9397	2007.52	46.3478
1541	Nanjing Univ	23	-1.0415	-0.2087	4	8	15	15.0414	430	0.654	2019.61	18.6957
1722	Nyu	23	-0.0709	0.1146	1	8	8	23.1719	1453	1.0075	2002.04	63.1739
2878	Washington Univ	23	0.4384	-0.3232	2	12	13	54.3481	2986	2.363	2009.09	129.826
1626	Natl Jewish Med & Res Ctr	22	0.2534	0.3387	3	13	28	22.0098	1295	1.0004	2002.27	58.8636
1657	Nci	22	0.4885	-0.1071	3	12	14	32.3288	1896	1.4695	2004.23	86.1818
2654	Univ Padua	22	-0.0757	0.4622	1	4	4	23.3172	1227	1.0599	2005.86	55.7727
2831	Vanderbilt Univ	22	-0.2071	-0.2844	1	15	19	31.8705	1156	1.4487	2015.86	52.5455
795	Hannover Med Sch	21	0.1776	0.5898	2	9	16	12.5599	436	0.5981	2016.76	20.7619
1673	Nhlbi	21	0.3373	-0.8363	1	6	15	28.7689	1653	1.3699	2005.81	78.7143
2076	Sichuan Univ	21	-0.7183	0.3927	2	3	3	18.4229	570	0.8773	2017.24	27.1429
2781	Univ Vermont	21	0.16	0.2743	2	12	14	35.358	2221	1.6837	2000.38	105.762
2867	W Virginia Univ	21	-0.8699	0.5603	4	4	18	17.769	1006	0.8461	2001.57	47.9048
240	Boston Univ	20	0.0485	-0.0051	2	22	27	27.0471	1439	1.3524	2010.9	71.95
1200	Kanazawa Univ	20	0.8249	-0.1824	3	5	8	24.9889	1297	1.2494	2011.45	64.85
1227	Keio Univ	20	1.0548	0.1287	3	4	5	15.7183	1011	0.7859	2008.45	50.55
1681	Niehs	20	0.5746	0.182	1	4	5	19.0959	1188	0.9548	2000.05	59.4
1727	Ohio State Univ	20	-0.5177	-0.2585	4	11	15	17.4191	771	0.871	2013.8	38.55
2388	Univ Calif Davis	20	0.7167	0.3998	1	3	3	21.606	1161	1.0803	1998.4	58.05
2433	Univ Edinburgh	20	0.3898	0.7935	2	2	2	42.5214	1756	2.1261	2009.55	87.8
2645	Univ Occupat & Environm Hlth	20	1.3912	-0.1119	3	3	5	8.1273	449	0.4064	2008.25	22.45
244	Brigham & Womens Hosp	19	-0.0681	-0.7099	1	13	29	26.6433	1235	1.4023	2012.79	65
357	Chinese Acad Med Sci	19	-1.0717	-0.592	4	8	21	20.8805	324	1.099	2020.32	17.0526
1939	Ruhr Univ Bochum	19	-0.7245	-0.1809	4	3	4	16.2926	952	0.8575	2003.21	50.1053
2955	Zhejiang Univ	19	-1.1838	0.2861	4	4	4	16.2109	355	0.8532	2018.16	18.6842
253	Brown Univ	18	-0.4032	-0.2507	1	11	14	22.3974	966	1.2443	2017.28	53.6667
1214	Karolinska Inst	18	-0.3152	0.7129	1	8	12	16.1723	610	0.8985	2013.72	33.8889
1308	Kyushu Univ	18	0.7575	0.1983	3	7	8	19.2414	895	1.069	2006.72	49.7222
1675	Niaid	18	0.5084	-0.3901	3	12	14	93.3786	6700	5.1877	2010.33	372.222
1754	Osaka Univ	18	0.8859	-0.0771	3	5	6	10.3855	526	0.577	2011.17	29.2222
2482	Univ Helsinki	18	-0.2161	0.8785	1	5	17	13.3352	786	0.7408	2008.78	43.6667
602	Emory Univ	17	-0.3833	0.22	1	9	9	19.4837	1095	1.1461	2006.24	64.4118
1026	Inserm	17	-0.431	0.7128	2	3	6	14.4824	718	0.8519	2009.06	42.2353
1289	Kumamoto Univ	17	1.0688	-0.2318	3	6	9	11.9755	648	0.7044	2004	38.1176
2140	Stanford Univ	17	-0.2103	-0.4309	1	16	24	27.1213	877	1.5954	2014.76	51.5882
2205	Tech Univ Dresden	17	0.3001	0.1602	2	4	4	9.1336	556	0.5373	2002.88	32.7059
2391	Univ Calif San Diego	17	-0.3873	-0.0656	1	12	13	32.1228	1212	1.8896	2011.71	71.2941
2625	Univ Nacl Autonoma Mexico	17	-0.4068	-0.6986	1	3	7	22.2897	1140	1.3112	2006.88	67.0588
2706	Univ Sao Paulo	17	-0.4155	0.5311	2	4	5	10.8898	474	0.6406	2015.12	27.8824
2735	Univ Texas	17	0.4632	0.101	2	12	14	24.6525	1446	1.4501	1997.53	85.0588
1400	Massachusetts Gen Hosp	16	-0.0088	-0.5501	1	11	22	46.4809	2108	2.9051	2007.81	131.75
1412	Mayo Clin	16	0.1384	-0.0363	1	13	16	25.7729	1487	1.6108	2011.06	92.9375
1625	Natl Jewish Hlth	16	0.7572	-0.3592	3	8	18	20.3167	793	1.2698	2016.94	49.5625
732	German Ctr Lung Res Dzl	15	-0.0486	0.6219	2	10	19	20.5231	489	1.3682	2019.07	32.6
1947	Rutgers State Univ	15	-0.4108	-0.5619	1	4	8	16.2275	865	1.0818	2015.13	57.6667
2218	Tel Aviv Univ	15	0.2284	0.4663	2	4	5	10.0548	468	0.6703	2007.13	31.2
2591	Univ Maryland	15	0.5081	-0.6086	2	4	4	13.1556	724	0.877	2010.93	48.2667
2658	Univ Paris 05	15	-0.5505	0.6791	2	5	8	27.0862	518	1.8057	2015.2	34.5333
2776	Univ Utah	15	-0.3157	-0.4376	1	10	17	26.9618	1572	1.7975	2014.07	104.8
2843	Vet Affairs Med Ctr	15	0.2988	-0.5891	2	6	14	27.4194	1838	1.828	1999.8	122.533
802	Harvard Med Sch	14	-0.1683	-0.5645	1	12	15	55.5737	1117	3.9695	2019.86	79.7857
1624	Natl Jewish Ctr Immunol & Resp Med	14	1.0004	-0.337	3	1	13	34.8631	2215	2.4902	1994.86	158.214
1672	Nhgri	14	0.246	-0.6995	1	10	20	11.067	532	0.7905	2013.64	38
1684	Niigata Univ	14	0.6346	0.0816	3	6	6	7.6075	386	0.5434	2010.36	27.5714
1929	Royal Free Hosp	14	0.6255	0.7551	1	1	5	19.4426	909	1.3888	1998.79	64.9286
1981	Sapporo Med Univ	14	0.9896	0.236	3	4	4	14.8908	911	1.0636	2006.36	65.0714
2025	Shandong Univ	14	-1.3186	-0.5179	4	3	5	8.558	142	0.6113	2019.36	10.1429
2260	Tohoku Univ	14	1.0107	-0.0192	3	6	6	10.2231	569	0.7302	2007.64	40.6429
2302	Tulane Univ	14	0.5326	0.4128	2	3	4	11.7382	719	0.8384	2000.43	51.3571
2651	Univ Oulu	14	-0.0276	0.9527	1	5	18	9.5626	467	0.683	2009.14	33.3571
74	Anhui Med Univ	13	-1.3517	0.1583	4	1	1	10.6293	235	0.8176	2019.31	18.0769
830	Helmholtz Zentrum Munchen	13	-0.2709	0.4924	2	14	25	16.3664	450	1.259	2017.62	34.6154
1531	Nagoya Univ	13	0.973	-0.1416	3	5	5	12.6035	715	0.9695	2007.62	55
1770	Oulu Univ Hosp	13	-0.076	1.1312	1	4	19	9.6499	461	0.7423	2009.54	35.4615
2264	Tokyo Med & Dent Univ	13	1.2957	-0.1538	3	4	5	6.6654	356	0.5127	2008.15	27.3846
2956	Zhengzhou Univ	13	-0.9487	-0.2647	4	6	6	12.129	299	0.933	2019.23	23

## Sheet: net
机构ID	合作机构ID	合作强度（相对值）	备注
1626	2413	15	ID为1626和2413的机构的合作强度为15（相对值）
1691	2867	14
1624	2413	13
1625	2413	11
351	357	10
804	1400	10
1770	2651	10
244	804	9
1540	1541	8
830	2621	7
1672	1673	7
1770	2482	6
2607	2920	6
682	2029	5
682	2278	5
732	795	5
963	2029	5
1923	1929	5
2390	2607	5
2482	2651	5
2546	2843	5
2607	2843	5
174	2625	4
244	1672	4
253	2278	4
268	351	4
268	357	4
360	2278	4
732	830	4
804	2607	4
804	2920	4
1026	2658	4
1174	2672	4
1214	2482	4
2029	2278	4
2345	2546	4
2403	2831	4
240	804	3
244	802	3
244	1673	3
795	2713	3
804	2680	3
963	2345	3
1174	2607	3
1174	2920	3
1200	2757	3
1412	2607	3
1526	2645	3
1727	2680	3
1947	2672	3
1947	2776	3
2607	2680	3
2672	2776	3
174	804	2
174	2140	2
240	2672	2
240	2680	2
240	2781	2
244	2140	2
268	1939	2
268	2025	2
300	963	2
351	2345	2
352	1691	2
352	2278	2
352	2867	2
357	2025	2
360	682	2
576	1681	2
576	1727	2
576	2140	2
576	2672	2
576	2680	2
732	2413	2
732	2621	2
795	830	2
802	2920	2
804	1672	2
804	1673	2
804	2140	2
804	2735	2
804	2776	2
830	2413	2
1174	2140	2
1200	1707	2
1214	1770	2
1227	2757	2
1289	1657	2
1289	2264	2
1289	2757	2
1308	1417	2
1400	2776	2
1400	2920	2
1412	2680	2
1417	2218	2
1526	2757	2
1540	1727	2
1626	1691	2
1657	1675	2
1675	2920	2
1707	2390	2
1707	2607	2
1754	2757	2
2140	2392	2
2140	2607	2
2140	2680	2
2302	2735	2
2390	2920	2
2391	2403	2
2392	2607	2
2403	2680	2
2413	2689	2
2621	2706	2
2625	2680	2
2672	2680	2
2680	2781	2
2680	2789	2
2680	2831	2
2776	2920	2
2878	2920	2
74	360	1
174	240	1
174	244	1
174	802	1
174	1400	1
174	2390	1
174	2413	1
174	2831	1
174	2878	1
174	2920	1
240	244	1
240	253	1
240	802	1
240	1026	1
240	1303	1
240	1400	1
240	1412	1
240	1625	1
240	1673	1
240	1681	1
240	1707	1
240	2278	1
240	2392	1
240	2546	1
240	2706	1
240	2735	1
240	2789	1
244	253	1
244	268	1
244	357	1
244	1412	1
244	2735	1
244	2878	1
253	300	1
253	1672	1
253	1722	1
253	2140	1
253	2392	1
253	2607	1
253	2831	1
253	2920	1
268	300	1
300	1540	1
300	1541	1
300	2345	1
300	2607	1
300	2920	1
300	2956	1
351	360	1
351	963	1
351	1540	1
351	2956	1
352	963	1
352	2955	1
357	360	1
357	1540	1
357	2140	1
357	2392	1
360	602	1
360	1541	1
360	2029	1
360	2076	1
360	2390	1
360	2391	1
360	2955	1
360	2956	1
576	804	1
576	1174	1
576	1626	1
576	1657	1
576	2591	1
576	2607	1
576	2831	1
576	2843	1
602	682	1
602	1707	1
602	2029	1
602	2607	1
602	2654	1
602	2680	1
602	2689	1
602	2831	1
682	804	1
682	1626	1
682	1947	1
682	2607	1
682	2955	1
732	1214	1
732	2392	1
732	2607	1
732	2672	1
732	2680	1
732	2689	1
795	804	1
795	1417	1
795	2403	1
795	2621	1
795	2672	1
795	2680	1
802	1174	1
802	1400	1
802	1675	1
802	2278	1
802	2391	1
802	2403	1
802	2546	1
802	2680	1
804	830	1
804	1227	1
804	1412	1
804	1526	1
804	1626	1
804	1727	1
804	2278	1
804	2345	1
804	2390	1
804	2391	1
804	2546	1
804	2621	1
804	2843	1
804	2878	1
830	1214	1
830	2076	1
830	2218	1
830	2392	1
830	2607	1
830	2680	1
830	2689	1
830	2706	1
830	2920	1
963	1214	1
963	1691	1
963	2278	1
1026	2689	1
1174	1625	1
1174	1675	1
1174	1707	1
1174	2278	1
1174	2345	1
1174	2413	1
1174	2591	1
1174	2680	1
1174	2831	1
1174	2878	1
1200	1308	1
1200	1531	1
1200	1672	1
1214	2391	1
1214	2413	1
1214	2651	1
1227	1981	1
1227	2607	1
1289	1526	1
1289	1675	1
1289	1754	1
1303	1625	1
1303	1684	1
1303	2413	1
1303	2672	1
1308	1531	1
1308	1626	1
1308	1657	1
1308	2757	1
1308	2781	1
1400	2390	1
1400	2391	1
1400	2607	1
1400	2680	1
1400	2735	1
1412	1657	1
1412	1722	1
1412	1923	1
1412	2278	1
1412	2392	1
1412	2672	1
1412	2781	1
1412	2843	1
1417	1626	1
1417	1657	1
1417	1770	1
1417	2433	1
1417	2651	1
1417	2713	1
1526	1531	1
1526	1625	1
1526	2264	1
1531	2260	1
1531	2878	1
1540	2029	1
1540	2956	1
1541	2029	1
1541	2391	1
1541	2392	1
1541	2607	1
1541	2956	1
1625	1707	1
1625	2680	1
1625	2789	1
1626	1981	1
1626	2205	1
1626	2278	1
1626	2607	1
1626	2680	1
1626	2867	1
1657	1672	1
1657	1673	1
1657	1681	1
1657	1722	1
1657	2391	1
1657	2680	1
1672	1675	1
1672	1947	1
1672	2672	1
1672	2680	1
1673	2680	1
1675	1754	1
1675	2345	1
1675	2403	1
1675	2672	1
1675	2680	1
1675	2789	1
1681	2388	1
1684	1754	1
1684	1923	1
1684	2260	1
1684	2390	1
1684	2621	1
1691	2390	1
1691	2413	1
1691	2781	1
1707	2413	1
1707	2672	1
1707	2680	1
1707	2781	1
1722	2140	1
1722	2651	1
1722	2680	1
1722	2776	1
1722	2781	1
1727	2029	1
1727	2345	1
1727	2391	1
1727	2546	1
1727	2607	1
1727	2867	1
1727	2920	1
1754	2735	1
1923	2388	1
1923	2390	1
1923	2413	1
1923	2621	1
1923	2654	1
1923	2735	1
1939	2403	1
1939	2621	1
1981	2260	1
1981	2413	1
2025	2029	1
2076	2621	1
2140	2390	1
2140	2403	1
2140	2672	1
2140	2789	1
2140	2831	1
2205	2218	1
2205	2345	1
2205	2878	1
2218	2621	1
2260	2264	1
2260	2345	1
2260	2645	1
2264	2757	1
2278	2607	1
2278	2658	1
2278	2672	1
2278	2955	1
2302	2713	1
2302	2781	1
2345	2781	1
2345	2789	1
2345	2831	1
2345	2920	1
2388	2413	1
2390	2392	1
2390	2403	1
2390	2413	1
2390	2621	1
2390	2680	1
2390	2735	1
2390	2776	1
2390	2789	1
2390	2831	1
2390	2956	1
2391	2482	1
2391	2625	1
2391	2672	1
2392	2413	1
2392	2672	1
2392	2680	1
2392	2689	1
2392	2781	1
2392	2831	1
2403	2654	1
2403	2776	1
2403	2789	1
2413	2607	1
2413	2680	1
2433	2607	1
2482	2654	1
2546	2680	1
2546	2878	1
2546	2920	1
2591	2789	1
2591	2878	1
2607	2621	1
2607	2658	1
2607	2689	1
2607	2713	1
2607	2776	1
2607	2831	1
2621	2920	1
2645	2757	1
2658	2680	1
2658	2706	1
2672	2781	1
2672	2831	1
2672	2920	1
2680	2776	1
2680	2920	1
2689	2781	1
2713	2735	1
2735	2789	1
2735	2878	1
2735	2920	1
2789	2843	1
2789	2878	1
2831	2878	1
2831	2920	1
