# Supplementary material for: Macrophages and pulmonary fibrosis: a bibliometric and visual analysis of publications from 1990 to 2023
Source: Front Med (Lausanne). 2024 Jun 17;11:1374177. doi: 10.3389/fmed.2024.1374177 (PMC11215139; doi:10.3389/fmed.2024.1374177)
Supplement: Supplementary file 4 [file Table_4.XLS]

## Sheet: map
Author ID	Author	Number of published papers	x	y	cluster	weight<Links>	weight<Total link strength>	weight<Norm. citations>	weight<Citations>	score<Avg. norm. citations>	score<Avg. pub. year>	score<Avg. citations>
1774	Carter, A. Brent	25	0.4923	-0.691	1	7	62	33.217	1672	1.3287	2015.8	66.88
7565	Kunkel, Sl	25	0.2085	0.2839	2	6	44	51.6879	2996	2.0675	1997.88	119.84
1389	Brody, Ar	22	-0.6417	0.1823	6	3	7	19.5284	1169	0.8877	1995.68	53.1364
13946	Strieter, Rm	21	0.0432	0.3631	2	6	43	51.1016	3168	2.4334	1997.52	150.857
6745	Kasper, M	19	-0.8542	-0.0936	4	3	31	7.1928	462	0.3786	1997.89	24.3158
1812	Castranova, V	18	0.9721	-0.4074	5	1	3	15.7444	1034	0.8747	1998.78	57.4444
11616	Phan, Sh	18	0.1954	0.4708	2	6	16	34.0859	2104	1.8937	1997.17	116.889
5296	Herzog, Erica L.	16	-0.0116	-0.09	1	4	11	23.1243	1106	1.4453	2015.75	69.125
5821	Hunninghake, Gw	16	-0.5082	0.9145	8	2	15	28.8861	1688	1.8054	1996.5	105.5
8472	Lison, D	16	0.1018	0.6453	2	3	11	12.2732	798	0.7671	1999.19	49.875
11819	Prasse, Antje	16	-0.0939	-0.6653	1	7	27	19.2778	983	1.2049	2013.12	61.4375
1212	Bonner, Jc	15	-0.6071	0.0514	6	2	6	11.6503	728	0.7767	1995.07	48.5333
1507	Burdick, Md	15	-0.0356	0.2021	2	5	32	42.8013	2708	2.8534	1997.87	180.533
5171	He, Chao	15	0.6655	-0.6083	1	7	43	14.1919	524	0.9461	2017.13	34.9333
7746	Larson-Casey, Jennifer L.	15	0.5413	-0.513	1	7	46	17.1231	548	1.1415	2018.13	36.5333
10751	Noble, Pw	15	-0.1562	0.3623	2	4	8	60.2182	3811	4.0145	1998.07	254.067
4389	Gochuico, Bernadette R.	14	-0.4341	-0.273	1	6	11	11.0921	508	0.7923	2013.71	36.2857
10054	Moore, Bethany B.	14	0.4529	-0.2527	1	2	3	15.7109	805	1.1222	2016.21	57.5
10180	Mossman, Bt	14	0.9534	-0.1361	5	2	4	26.2764	1564	1.8769	1997.29	111.714
17660	Zissel, Gernot	14	0.0607	-0.6517	1	6	26	19.5681	1156	1.3977	2011.64	82.5714
779	Bargagli, Elena	13	-0.108	-0.9288	1	5	16	10.7455	462	0.8266	2015.15	35.5385
4440	Gomer, Richard H.	13	-0.4628	0.5564	12	1	12	10.8537	370	0.8349	2017.31	28.4615
6114	Izumi, T	13	-0.1322	0.8753	9	2	21	3.1756	194	0.2443	1996.77	14.9231
6592	Kaminski, Naftali	13	-0.28	-0.1761	1	7	10	26.4836	725	2.0372	2017.31	55.7692
10222	Mueller-Quernheim, Joachim	13	0.1451	-0.7739	1	5	25	16.7803	1025	1.2908	2011.38	78.8462
10246	Muller, M	13	-1.0112	-0.1811	4	3	27	4.6818	299	0.3601	1995.77	23
10358	Nagai, S	13	-0.0952	1.0455	9	2	21	3.1756	194	0.2443	1996.77	14.9231
12273	Riches, Dwh	13	-0.3052	0.3808	2	2	7	34.3404	2124	2.6416	1997.54	163.385
12415	Rom, Wn	13	-0.7241	0.2841	6	1	1	18.1781	1125	1.3983	1994.38	86.5385
12446	Rosas, Ivan O.	13	-0.3266	-0.3671	1	5	11	26.4859	908	2.0374	2014.92	69.8462
15555	Wang, Wei	13	-0.3874	-0.6447	3	2	3	8.8726	240	0.6825	2018.15	18.4615
3191	Drent, M	12	0.6896	0.1219	2	3	3	6.455	387	0.5379	1997.83	32.25
3247	Dubois, Rm	12	0.717	0.6619	2	4	22	17.9913	1046	1.4993	1995.42	87.1667
11666	Pilling, Darrell	12	-0.5314	0.4347	12	1	12	10.6287	359	0.8857	2017.67	29.9167
15470	Wang, Jing	12	-0.218	-0.2869	3	4	9	15.423	97	1.2852	2021.67	8.0833
15625	Wang, Yi	12	0.4315	0.8044	10	2	15	24.5307	574	2.0442	2019.58	47.8333
1102	Black, Cm	11	0.6104	0.4443	2	5	20	14.3234	838	1.3021	1996.64	76.1818
1107	Blackburn, Michael R.	11	0.1251	-0.4441	1	3	7	14.5287	714	1.3208	2012.82	64.9091
3195	Driscoll, Ke	11	0.9253	-0.0222	5	1	3	22.1124	1171	2.0102	1994.27	106.454
3366	Eickelberg, Oliver	11	-0.1546	-0.4427	1	3	4	13.007	492	1.1825	2015.73	44.7273
5453	Hogaboam, Cory M.	11	0.136	-0.1579	1	3	4	13.2411	908	1.2037	2010	82.5455
7752	Laskin, Debra L.	11	-0.7687	-0.5811	1	3	21	14.67	747	1.3336	2015.91	67.9091
13009	Schuh, D	11	-1.0648	-0.0128	4	3	25	4.157	274	0.3779	1996.18	24.9091
13091	Selman, M	11	-0.7443	0.5635	15	1	10	12.4811	780	1.1346	1999	70.9091
534	Ask, Kjetil	10	0.0433	-0.8904	1	4	4	10.0665	296	1.0066	2019.1	29.6
848	Batteux, Frederic	10	0.1406	0.897	11	1	9	7.456	259	0.7456	2018.1	25.9
3204	Du Bois, Rm	10	0.6673	0.277	2	7	11	11.7825	744	1.1783	2001.2	74.4
3410	Elias, Jack A.	10	-0.0758	-0.2166	1	6	12	11.9938	576	1.1994	2016.2	57.6
7754	Laskin, Jeffrey D.	10	-0.9025	-0.4849	1	3	19	14.3778	743	1.4378	2015.4	74.3
7774	Laurent, Gj	10	0.5818	0.5883	2	5	21	14.752	839	1.4752	1997	83.9
10315	Murthy, Shubha	10	0.8135	-0.6996	1	5	30	9.7439	520	0.9744	2012.7	52
11318	Pardo, A	10	-0.845	0.658	15	1	10	11.7097	726	1.171	1999.3	72.6
12402	Rojas, Mauricio	10	0.3358	0.0181	1	1	4	18.7275	702	1.8728	2015.9	70.2
12499	Rottoli, Paola	10	-0.2048	-0.8151	1	4	12	7.5109	400	0.7511	2013.6	40
12573	Ryan, Alan J.	10	0.6327	-0.7995	1	6	33	14.599	641	1.4599	2013.8	64.1
17235	Zhang, Wei	10	-0.4314	-0.4987	3	3	6	8.5365	286	0.8536	2017.4	28.6
102	Agostini, C	9	0.6629	-0.1407	2	1	7	5.5109	320	0.6123	1998.56	35.5556
1934	Chao, Jie	9	-0.2934	-0.5276	3	3	9	10.0887	277	1.121	2019.11	30.7778
2031	Chen, Jie	9	-1.0355	0.2986	13	1	6	16.1148	312	1.7905	2020	34.6667
2695	Dai, Huaping	9	-0.2437	0.0184	3	2	5	5.2118	56	0.5791	2020	6.2222
4526	Gow, Andrew J.	9	-0.6593	-0.4396	1	5	19	3.3901	169	0.3767	2015.78	18.7778
4663	Gu, Linlin	9	0.6965	-0.4237	1	6	27	7.8288	197	0.8699	2018.78	21.8889
6848	Keane, Mp	9	0.1254	0.1374	2	4	19	21.3082	1340	2.3676	2001.56	148.889
7104	King, Te	9	-0.2882	0.2491	2	2	5	10.9586	725	1.2176	1995.89	80.5556
7386	Koslowski, R	9	-0.8978	0.069	4	3	13	3.3342	204	0.3705	2000.67	22.6667
7553	Kumar, Rk	9	-0.4998	0.1458	6	2	2	3.7251	195	0.4139	1994	21.6667
7664	Lafyatis, Robert	9	0.2749	-0.0867	1	2	5	34.6858	857	3.854	2016.67	95.2222
10252	Muller-Quernheim, J	9	0.5423	0.1528	2	4	4	11.5881	771	1.2876	2000.89	85.6667
10624	Nicco, Carole	9	0.1667	1.0304	11	1	9	5.5442	207	0.616	2017.89	23
13097	Semenzato, G	9	0.6099	-0.0109	2	4	10	10.0167	546	1.113	1997.33	60.6667
14558	Thannickal, Victor J.	9	0.4083	-0.4181	1	8	11	27.9884	1228	3.1098	2016.56	136.444
14673	Toews, Gb	9	0.3966	0.2461	2	4	6	13.4899	935	1.4989	2003.11	103.889
14720	Tonnel, Ab	9	-0.2166	0.6304	2	1	7	7.869	463	0.8743	1994.67	51.4444
15384	Wallaert, B	9	-0.0864	0.6151	2	2	8	8.1647	498	0.9072	1996.22	55.3333
15417	Wang, Chen	9	-0.1715	-0.0852	3	2	8	13.8377	101	1.5375	2020.56	11.2222
17545	Zhou, Yang	9	-0.011	-0.3386	1	6	12	13.5708	532	1.5079	2016.33	59.1111
95	Agarwal, Sandeep K.	8	0.181	-0.3095	1	3	5	12.2496	501	1.5312	2015.75	62.625
890	Beers, Michael F.	8	-0.6379	-0.2494	1	3	6	4.2023	179	0.5253	2016	22.375
1368	Brien, Jf	8	1.03	0.3182	14	1	8	3.2403	198	0.405	1998.38	24.75
5452	Hogaboam, Cm	8	0.3528	0.3971	2	4	13	9.5447	533	1.1931	2000.88	66.625
5780	Huaux, F	8	0.2471	0.6531	2	2	10	6.5418	442	0.8177	2002.12	55.25
5980	Inui, Naoki	8	-0.4533	-0.9239	7	2	16	6.8978	282	0.8622	2017.12	35.25
8092	Li, Chao	8	-0.9653	0.4027	13	1	6	11.0383	285	1.3798	2020.12	35.625
9356	Massey, Te	8	1.0515	0.1868	14	1	8	3.2403	198	0.405	1998.38	24.75
9517	Mcanulty, Rj	8	0.8171	0.5541	2	5	17	12.7326	737	1.5916	1997.75	92.125
10028	Monick, Mm	8	-0.4282	0.7842	8	2	9	4.5562	262	0.5695	1998.62	32.75
10445	Nakamura, Yutaro	8	-0.5749	-0.7932	7	2	16	6.8978	282	0.8622	2017.12	35.25
11288	Pantelidis, P	8	0.7787	0.4078	2	5	14	7.3576	433	0.9197	1998.38	54.125
12833	Satake, N	8	-0.2623	0.9985	9	2	16	1.5606	93	0.1951	1996.62	11.625
13028	Schwartz, Da	8	-0.6212	0.8138	8	2	8	12.2897	623	1.5362	1992.62	77.875
13092	Selman, Moises	8	-0.4048	-0.0861	1	1	1	4.7182	218	0.5898	2014.88	27.25
13561	Sisson, Thomas H.	8	0.3251	-0.24	1	3	4	9.7676	591	1.2209	2014.25	73.875
14005	Suda, Takafumi	8	-0.6226	-0.9521	7	2	16	6.8978	282	0.8622	2017.12	35.25
14368	Tanaka, I	8	0.268	-1.0473	16	1	8	1.5033	100	0.1879	2001.25	12.5
15068	Vallyathan, V	8	0.9511	-0.2912	5	2	4	12.6067	825	1.5758	1997.88	103.125
15199	Venosa, Alessandro	8	-0.7923	-0.3399	1	4	17	3.3237	106	0.4155	2019.25	13.25
16283	Xiong, Weining	8	0.5744	0.8904	10	2	14	19.4851	457	2.4356	2020	57.125
16483	Yamato, H	8	0.3718	-0.9632	16	1	8	1.5033	100	0.1879	2001.25	12.5
17163	Zhang, Lei	8	0.4263	0.9709	10	2	13	18.9471	362	2.3684	2020.5	45.25
17552	Zhou, Yong	8	0.3426	-0.584	1	4	4	3.6809	95	0.4601	2019	11.875

## Sheet: net
Author ID	Co-author ID	Cooperation intensity (relative value)
1774	7746	15
7565	13946	15
1774	5171	14
1507	13946	13
6114	10358	13
6745	10246	13
4440	11666	12
10222	17660	12
6745	13009	11
10246	13009	11
1774	10315	10
1774	12573	10
5171	7746	10
7752	7754	10
11318	13091	10
848	10624	9
1507	7565	9
1774	4663	9
10222	11819	9
11819	17660	9
779	12499	8
1368	9356	8
4663	7746	8
5452	7565	8
5780	8472	8
5821	10028	8
5980	10445	8
5980	14005	8
6114	12833	8
7774	9517	8
10315	12573	8
10358	12833	8
10445	14005	8
14368	16483	8
15625	16283	8
102	13097	7
1102	3247	7
1507	6848	7
5821	13028	7
6745	7386	7
6848	13946	7
14720	15384	7
15625	17163	7
2031	8092	6
3247	7774	6
4389	12446	6
4526	7752	6
5171	10315	6
5171	12573	6
7565	11616	6
7746	12573	6
16283	17163	6
1212	1389	5
3247	11288	5
4526	7754	5
4526	15199	5
4663	5171	5
7752	15199	5
1102	7774	4
1934	17235	4
2695	15417	4
3247	9517	4
3410	5296	4
3410	17545	4
6848	7565	4
7104	12273	4
7664	12402	4
7746	10315	4
7754	15199	4
11616	13946	4
15417	15470	4
95	1107	3
779	11819	3
890	15199	3
1102	3204	3
1102	9517	3
1102	11288	3
1107	17545	3
1774	14558	3
1812	15068	3
1934	15470	3
3195	10180	3
3204	11288	3
5296	6592	3
7386	10246	3
7386	13009	3
10751	12273	3
779	10222	2
779	17660	2
890	4526	2
1507	10751	2
1934	15555	2
3366	11819	2
4663	10315	2
4663	12573	2
5296	5453	2
5296	17545	2
5452	13946	2
5452	14673	2
5780	11616	2
6592	12446	2
7565	14673	2
7746	14558	2
7774	11288	2
8472	11616	2
10054	13561	2
10751	13946	2
11819	12499	2
95	7664	1
95	17545	1
534	779	1
534	10222	1
534	11819	1
534	17660	1
890	4389	1
1107	17660	1
1212	7553	1
1389	7553	1
1389	12415	1
1507	11616	1
1774	17552	1
2695	15470	1
3191	3204	1
3191	10252	1
3191	13097	1
3204	7774	1
3204	9517	1
3204	10252	1
3204	13097	1
3366	6592	1
3366	12446	1
3410	4389	1
3410	5453	1
3410	6592	1
3410	12446	1
4389	4526	1
4389	6592	1
4389	17545	1
4663	14558	1
5171	14558	1
5171	17552	1
5452	6848	1
5453	13561	1
6592	13092	1
6592	17545	1
7104	10751	1
7746	17552	1
8472	15384	1
9517	11288	1
10028	13028	1
10054	14558	1
10180	15068	1
10222	12499	1
10252	13097	1
10252	14673	1
11616	14673	1
11819	12446	1
12499	17660	1
12573	14558	1
13561	14558	1
14558	17552	1
15470	17235	1
15555	17235	1
