# Supplementary material for: Macrophages and pulmonary fibrosis: a bibliometric and visual analysis of publications from 1990 to 2023
Source: Front Med (Lausanne). 2024 Jun 17;11:1374177. doi: 10.3389/fmed.2024.1374177 (PMC11215139; doi:10.3389/fmed.2024.1374177)
Supplement: Supplementary file 5 [file Table_5.XLS]

## Sheet: Sheet1
Periodical ID	Periodical	Number of published papers	x	y	weight<Norm. citations>	weight<Citations>	score<Avg. norm. citations>	score<Avg. pub. year>	score<Avg. citations>
42	American Journal Of Respiratory Cell And Molecular Biology	176	-0.6321	0.0775	208.722	10923	1.1859	2005.03	62.0625
41	American Journal Of Respiratory And Critical Care Medicine	107	0.4411	-0.1829	189.334	11511	1.7695	2002.49	107.579
39	American Journal Of Physiology-Lung Cellular And Molecular Physiology	102	-0.4322	-0.6734	88.4834	4898	0.8675	2007.26	48.0196
298	European Respiratory Journal	100	0.0026	0.7585	96.1488	5105	0.9615	2001.96	51.05
478	Journal Of Immunology	79	0.2217	0.7828	117.017	6418	1.4812	2007.22	81.2405
330	Frontiers In Immunology	72	-0.2978	0.5053	78.6329	1885	1.0921	2020.19	26.1806
697	Plos One	64	-0.5759	-0.5086	40.1448	1840	0.6273	2015.7	28.75
34	American Journal Of Pathology	60	0.3628	-0.6371	66.4345	4050	1.1072	2005.05	67.5
407	International Journal Of Molecular Sciences	52	-0.5066	0.4455	41.6922	948	0.8018	2020.65	18.2308
309	Experimental Lung Research	50	0.1575	0.5721	35.6262	1850	0.7125	2003.48	37
183	Chest	47	-0.1297	0.9498	32.667	1894	0.695	1999.57	40.2979
728	Respiratory Research	46	0.5408	-0.8032	36.8033	1575	0.8001	2014.11	34.2391
726	Respiratory Medicine	42	0.8346	-0.021	40.8301	2311	0.9721	2005.24	55.0238
395	International Immunopharmacology	38	-0.8114	-0.5323	25.3924	671	0.6682	2018.79	17.6579
738	Sarcoidosis Vasculitis And Diffuse Lung Diseases	33	0.1413	1.008	9.7604	583	0.2958	2006.45	17.6667
752	Scientific Reports	32	-0.2581	-0.8215	24.0444	841	0.7514	2018.16	26.2812
723	Respiration	30	0.0642	0.4046	15.3267	821	0.5109	2004.7	27.3667
449	Journal Of Clinical Investigation	29	-0.8474	-0.0633	99.4913	4910	3.4307	2002.86	169.31
434	Journal Of Biological Chemistry	28	0.1774	0.2507	37.2018	2066	1.3286	2007.93	73.7857
792	Toxicology And Applied Pharmacology	28	-0.1413	-0.3984	17.5498	940	0.6268	2006.25	33.5714
337	Frontiers In Pharmacology	26	-0.0769	0.5579	23.6937	485	0.9113	2019.92	18.6538
562	Lung	24	0.704	0.3738	12.3696	612	0.5154	2004.42	25.5
49	American Review Of Respiratory Disease	23	0.3631	0.6209	27.8948	1623	1.2128	1992	70.5652
193	Clinical And Experimental Immunology	23	0.7995	-0.245	18.2502	1069	0.7935	2001.22	46.4783
780	Thorax	23	0.6325	-0.1057	33.7514	1869	1.4675	2001.13	81.2609
495	Journal Of Leukocyte Biology	22	0.7491	0.6181	20.9805	1204	0.9537	2002.86	54.7273
319	Faseb Journal	21	0.3237	-0.9001	23.9169	1207	1.1389	2013.71	57.4762
732	Rheumatology	21	1.0373	-0.2149	28.3464	814	1.3498	2018.48	38.7619
387	Inhalation Toxicology	20	-0.2504	-0.0646	6.6471	360	0.3324	2006.5	18
271	Environmental Health Perspectives	19	-0.2031	0.1452	19.508	1228	1.0267	1997.26	64.6316
795	Toxicology Letters	19	-0.1429	0.3636	12.2965	294	0.6472	2009.32	15.4737
703	Proceedings Of The National Academy Of Sciences Of The United States Of	18	-0.0395	-0.7757	56.167	3451	3.1204	2007.56	191.722
519	Journal Of Pathology	17	-0.2318	0.7089	47.4526	4023	2.7913	2004.41	236.647
569	Mediators Of Inflammation	17	0.7936	-0.4661	11.3397	556	0.667	2007.53	32.7059
708	Pulmonary Pharmacology & Therapeutics	16	0.5088	0.2733	8.0626	319	0.5039	2014.38	19.9375
135	Bmc Pulmonary Medicine	14	0.4269	0.9343	4.4278	178	0.3163	2017.29	12.7143
296	European Journal Of Pharmacology	14	-0.0632	0.0006	15.4329	850	1.1024	2011.29	60.7143
325	Free Radical Biology And Medicine	14	0.2577	-0.2637	22.7617	1180	1.6258	2006	84.2857
532	Journal Of Rheumatology	14	0.6791	0.1313	9.3221	534	0.6659	2006.21	38.1429
729	Respirology	14	0.4001	-0.4111	4.4705	254	0.3193	2009.93	18.1429
790	Toxicological Sciences	14	-0.328	0.299	14.8729	928	1.0624	2008.71	66.2857
96	Biochemical And Biophysical Research Communications	13	-1.1403	0.2109	7.2917	244	0.5609	2013.62	18.7692
382	Inflammation	13	-0.8735	0.1556	4.7488	242	0.3653	2003.92	18.6154
423	Jci Insight	13	-0.4804	-0.9211	22.8425	388	1.7571	2019.69	29.8462
711	Radiation Research	13	-0.1839	-0.6138	7.9651	463	0.6127	2009.85	35.6154
117	Biomedicine & Pharmacotherapy	12	1.1195	0.282	5.9714	170	0.4976	2017.92	14.1667
171	Cells	12	-0.7156	0.5491	18.3222	228	1.5268	2021.25	19
331	Frontiers In Medicine	12	0.3163	0.3966	9.2313	251	0.7693	2020.67	20.9167
410	International Journal Of Radiation Oncology Biology Physics	12	0.5946	-0.338	26.2666	1677	2.1889	2004	139.75
556	Laboratory Investigation	12	0.5622	0.7305	9.4629	424	0.7886	2007.83	35.3333
670	Pediatric Pulmonology	12	-0.6791	0.8002	9.5733	363	0.7978	2007.5	30.25
791	Toxicology	12	0.0115	-0.5442	7.0238	366	0.5853	2011.67	30.5
86	Arthritis & Rheumatology	11	-0.3423	-0.4664	15.1547	433	1.3777	2018.45	39.3636
89	Arthritis Research & Therapy	11	1.0628	-0.4812	6.5745	270	0.5977	2016.91	24.5455
402	International Journal Of Experimental Pathology	11	0.096	-0.9707	4.719	265	0.429	2000.18	24.0909
625	Nature Communications	11	-0.7165	0.3118	21.3029	764	1.9366	2019.73	69.4545
661	Particle And Fibre Toxicology	11	-0.4474	-0.1094	14.8744	558	1.3522	2016.18	50.7273
759	Seminars In Respiratory And Critical Care Medicine	11	-0.5147	0.2432	8.4595	511	0.769	2006.18	46.4545
35	American Journal Of Physiology	10	0.4938	0.0363	7.0446	357	0.7045	1992.7	35.7
232	Current Opinion In Pulmonary Medicine	10	0.0597	-0.3283	9.4747	534	0.9475	2009.6	53.4
360	Human Pathology	10	-0.0881	-0.196	7.1653	366	0.7165	2007.2	36.6
429	Journal Of Allergy And Clinical Immunology	10	-0.3927	0.0793	19.2312	739	1.9231	2011.2	73.9
443	Journal Of Cellular And Molecular Medicine	10	0.3376	0.1557	9.2676	194	0.9268	2019	19.4
524	Journal Of Pharmacology And Experimental Therapeutics	10	0.9307	0.4758	17.1687	894	1.7169	2004.3	89.4
622	Nanotoxicology	10	-1.1198	-0.482	10.115	434	1.0115	2017.3	43.4
142	British Journal Of Pharmacology	9	-0.1435	-1.0462	10.2335	410	1.1371	2008	45.5556
431	Journal Of Applied Toxicology	9	-1.1207	-0.072	2.0341	65	0.226	2011.11	7.2222
650	Oncotarget	9	0.5722	-0.5595	3.8482	154	0.4276	2016	17.1111
98	Biochemical Pharmacology	8	-0.642	-0.1269	5.0287	140	0.6286	2018.88	17.5
184	Chinese Medical Journal	8	0.2932	-0.0418	2.3608	90	0.2951	2007.38	11.25
233	Current Opinion In Rheumatology	8	1.0689	0.0305	6.0014	292	0.7502	2013.62	36.5
242	Cytokine	8	0.1675	-0.7149	5.2737	266	0.6592	2009.88	33.25
266	Ecotoxicology And Environmental Safety	8	0.1185	0.0641	9.0348	219	1.1293	2021	27.375
357	Histopathology	8	-0.5019	-0.3062	8.2597	453	1.0325	2006.25	56.625
466	Journal Of Experimental Medicine	8	-0.936	0.4332	45.4569	2223	5.6821	2008.12	277.875
686	Pharmacological Research	8	0.2036	-0.4832	8.6829	233	1.0854	2018.75	29.125
44	American Journal Of Surgical Pathology	7	-0.0217	0.2114	4.8777	319	0.6968	2007.29	45.5714
165	Cell Death & Disease	7	-0.961	-0.2776	8.6272	195	1.2325	2019.71	27.8571
202	Clinical Immunology	7	-0.292	-0.2631	7.6814	488	1.0973	2009.57	69.7143
299	European Respiratory Review	7	0.5217	0.4889	4.606	117	0.658	2019.71	16.7143
338	Frontiers In Physiology	7	-0.7337	-0.3117	5.9547	147	0.8507	2018.86	21
355	Histochemistry And Cell Biology	7	0.8789	0.2188	2.6852	189	0.3836	2003.14	27
392	International Archives Of Allergy And Immunology	7	-0.3329	1.1648	2.0089	132	0.287	2003.43	18.8571
554	Kidney International	7	-0.704	-0.7678	9.5659	548	1.3666	2003.86	78.2857
603	Molecular Medicine	7	0.1091	-0.1308	4.3879	136	0.6268	2016.14	19.4286
604	Molecular Medicine Reports	7	0.7859	-0.72	1.8791	82	0.2684	2015.86	11.7143
666	Pathology International	7	-0.4708	0.6588	4.2955	256	0.6136	2002.86	36.5714
788	Toxicologic Pathology	7	-0.4012	0.8822	3.793	236	0.5419	2001.57	33.7143
