# Supplementary material for: Macrophages and pulmonary fibrosis: a bibliometric and visual analysis of publications from 1990 to 2023
Source: Front Med (Lausanne). 2024 Jun 17;11:1374177. doi: 10.3389/fmed.2024.1374177 (PMC11215139; doi:10.3389/fmed.2024.1374177)
Supplement: Supplementary file 6 [file Table_6.XLS]

## Sheet: map
Segment ID	Segment	frequency	x	y	cluster	weight<Links>	weight<Total link strength>
199	Respiratory system	956	-0.8542	-0.3387	1	52	26.9851
27	Cell biology	496	-0.688	-0.3205	1	76	57.3981
106	Immunology	486	-0.7547	-0.273	1	59	40.2016
18	Biochemistry & molecular biology	475	-0.699	-0.4075	1	81	62.6298
166	Pharmacology & pharmacy	347	-0.7003	-0.3335	1	94	62.8165
137	Medicine, research & experimental	271	-0.7405	-0.3186	1	96	74.3953
216	Toxicology	263	-0.5816	-0.336	1	89	53.0041
163	Pathology	237	-0.7618	-0.2973	1	70	49.8816
46	Critical care medicine	184	-0.8499	-0.339	1	52	27.7013
175	Physiology	165	-0.7693	-0.3352	1	78	55.3049
144	Multidisciplinary sciences	153	-0.6142	-0.3749	1	135	93.8092
200	Rheumatology	114	-0.8413	-0.3155	1	22	8.2067
135	Medicine, general & internal	101	-0.8406	-0.3753	1	85	57.785
154	Oncology	97	-0.7531	-0.2956	1	59	37.4389
32	Chemistry, multidisciplinary	89	-0.1832	-0.4494	3	64	53.1306
77	Environmental sciences	84	-0.3597	-0.4513	4	61	37.2896
194	Public, environmental & occupational health	82	-0.8817	-0.5175	2	54	35.02
195	Radiology, nuclear medicine & medical imaging	60	-0.7722	-0.3759	1	45	21.9883
25	Cardiac & cardiovascular systems	57	-0.8401	-0.3136	1	26	14.9423
20	Biology	52	-0.6313	-0.367	1	91	69.649
99	Hematology	46	-0.7671	-0.2793	1	55	32.7111
88	Genetics & heredity	41	-0.6219	-0.3087	1	74	55.2213
164	Pediatrics	40	-0.8596	-0.3803	1	74	38.3205
7	Allergy	39	-0.7791	-0.2661	1	26	13.511
146	Nanoscience & nanotechnology	39	-0.1497	-0.473	3	57	51.3665
31	Chemistry, medicinal	38	-0.5588	-0.309	1	71	48.1163
21	Biophysics	37	-0.5375	-0.3235	1	91	66.2171
213	Surgery	32	-0.8066	-0.3228	1	38	22.6784
223	Veterinary sciences	31	-0.6306	-0.268	1	37	17.488
60	Endocrinology & metabolism	29	-0.7484	-0.3098	1	74	45.0239
22	Biotechnology & applied microbiology	28	-0.5317	-0.3172	1	89	62.7639
134	Medical laboratory technology	25	-0.7398	-0.3034	1	79	56.9083
51	Dermatology	24	-0.7681	-0.2642	1	32	13.284
140	Microbiology	21	-0.6255	-0.2789	1	59	37.2319
222	Urology & nephrology	21	-0.8036	-0.2814	1	25	11.6793
124	Materials science, multidisciplinary	19	-0.1346	-0.4831	3	52	50.0661
165	Peripheral vascular disease	18	-0.8172	-0.316	1	53	30.9471
26	Cell & tissue engineering	17	-0.7209	-0.2926	1	72	50.4186
217	Transplantation	16	-0.7943	-0.2891	1	56	31.3642
63	Engineering, biomedical	15	-0.5829	-0.381	1	91	48.0887
108	Infectious diseases	14	-0.7557	-0.2945	1	46	27.9824
119	Materials science, biomaterials	13	-0.3511	-0.3969	3	78	52.4502
17	Biochemical research methods	12	-0.5093	-0.3277	1	84	56.9667
34	Chemistry, physical	12	-0.1483	-0.4696	3	57	51.0457
87	Gastroenterology & hepatology	12	-0.7992	-0.2915	1	36	16.369
111	Integrative & complementary medicine	12	-0.6792	-0.3223	1	75	44.78
224	Virology	12	-0.6762	-0.2679	1	54	35.1504
85	Food science & technology	11	-0.4807	-0.3006	1	37	21.5175
151	Nutrition & dietetics	11	-0.7082	-0.3272	1	72	38.216
167	Physics, applied	11	-0.1407	-0.4932	3	53	47.2535
141	Microscopy	9	-0.3776	-0.4017	3	91	61.6993
169	Physics, condensed matter	9	-0.1255	-0.4924	3	51	45.7075
149	Nuclear science & technology	8	-0.1319	-0.512	3	49	25.5897
177	Plant sciences	8	-0.5288	-0.3125	4	47	31.5067
8	Anatomy & morphology	7	-0.7489	-0.3631	1	76	51.2333
52	Developmental biology	7	-0.6808	-0.2891	1	62	46.4438
210	Sport sciences	7	-0.8664	-0.3891	1	31	14.9228
136	Medicine, legal	6	-0.6397	-0.3228	1	24	9.8419
162	Parasitology	6	-0.6683	-0.2818	1	51	31.2914
94	Geriatrics & gerontology	5	-0.8592	-0.419	1	83	52.8622
148	Neurosciences	5	-0.8232	-0.4044	1	58	41.3784
35	Clinical neurology	4	-0.8699	-0.4073	1	58	37.2496
156	Ophthalmology	4	-0.8148	-0.3115	1	6	2.1242
220	Tropical medicine	4	-0.7523	-0.3276	1	51	28.6324
28	Chemistry, analytical	3	-0.2744	-0.4001	3	59	36.4544
64	Engineering, chemical	3	-0.1725	-0.4682	3	59	43.9485
67	Engineering, environmental	3	-0.2567	-0.4602	4	64	38.7768
127	Mathematical & computational biology	3	-0.5797	-0.3873	1	89	57.8998
159	Orthopedics	3	-0.8594	-0.3414	1	23	12.2724
160	Otorhinolaryngology	3	-0.8244	-0.3833	1	32	13.5492
5	Agriculture, multidisciplinary	2	-0.4701	-0.3357	4	60	36.9326
10	Anesthesiology	2	-0.8636	-0.3617	1	41	21.6439
11	Anthropology	2	-0.5869	-0.5542	4	22	8.9119
29	Chemistry, applied	2	-0.2945	-0.3892	3	71	50.9141
33	Chemistry, organic	2	-0.2495	-0.39	3	42	26.035
145	Mycology	2	-0.5834	-0.2933	1	63	41.1165
152	Obstetrics & gynecology	2	-0.7832	-0.3488	1	36	17.4688
225	Water resources	2	-0.3042	-0.4706	4	38	26.3761
41	Computer science, interdisciplinary applications	1	-0.3356	-0.5877	5	97	54.2523
50	Dentistry, oral surgery & medicine	1	-0.5986	-0.3395	1	5	2.2124
76	Entomology	1	-0.5306	-0.3312	4	45	24.3036
95	Gerontology	1	-0.9336	-0.5182	2	50	30.8696
97	Health care sciences & services	1	-0.8915	-0.4693	2	56	34.5005
181	Psychiatry	1	-0.9404	-0.5304	2	45	32.1996
196	Rehabilitation	1	-0.9064	-0.4733	2	50	27.0976
209	Spectroscopy	1	-0.2284	-0.4323	3	65	44.2197
211	Statistics & probability	1	-0.5949	-0.6908	5	15	8.3046
227	Zoology	1	-0.5465	-0.3647	4	55	32.6135
1	Acoustics	0	-0.4064	-0.5474	5	29	14.664
2	Agricultural economics & policy	0	-0.7726	-0.7548	2	25	19.6043
3	Agricultural engineering	0	-0.3474	-0.3894	4	61	35.2343
4	Agriculture, dairy & animal science	0	-0.5837	-0.2665	1	25	11.5935
6	Agronomy	0	-0.4577	-0.3427	4	41	25.1231
9	Andrology	0	-0.7141	-0.2704	1	44	27.3457
12	Area studies	0	-0.8143	-0.7446	2	24	15.5774
13	Astronomy & astrophysics	0	-0.025	-0.5731	3	4	3.5374
14	Audiology & speech-language pathology	0	-0.8374	-0.5017	2	22	13.8446
15	Automation & control systems	0	-0.3045	-0.658	5	28	22.2628
16	Behavioral sciences	0	-0.8153	-0.4495	2	62	41.1569
19	Biodiversity conservation	0	-0.4591	-0.4193	4	40	28.1499
23	Business	0	-0.7817	-0.7356	2	27	18.5804
24	Business, finance	0	-0.7705	-0.7581	2	23	15.8077
30	Chemistry, inorganic & nuclear	0	-0.159	-0.4344	3	43	29.971
36	Communication	0	-0.8688	-0.6936	2	31	15.5326
37	Computer science, artificial intelligence	0	-0.3407	-0.6677	5	28	23.417
38	Computer science, cybernetics	0	-0.4504	-0.6576	5	45	30.1252
39	Computer science, hardware & architecture	0	-0.3149	-0.6696	5	25	22.1106
40	Computer science, information systems	0	-0.3574	-0.6767	5	27	22.8986
42	Computer science, software engineering	0	-0.3319	-0.6805	5	24	18.8233
43	Computer science, theory & methods	0	-0.3298	-0.6794	5	29	24.3413
44	Construction & building technology	0	-0.1916	-0.532	3	41	22.785
45	Criminology & penology	0	-0.9286	-0.6532	2	29	18.3934
47	Crystallography	0	-0.1692	-0.4519	3	57	43.4772
48	Cultural studies	0	-0.8151	-0.714	2	22	12.935
49	Demography	0	-0.8375	-0.7126	2	37	22.5906
53	Ecology	0	-0.4672	-0.4118	4	45	32.1725
54	Economics	0	-0.7805	-0.7526	2	29	22.8892
55	Education & educational research	0	-0.9408	-0.6018	2	17	8.3871
56	Education, scientific disciplines	0	-0.9329	-0.529	2	18	9.0897
57	Education, special	0	-0.9479	-0.5736	2	30	17.2492
58	Electrochemistry	0	-0.144	-0.4719	3	52	45.0849
59	Emergency medicine	0	-0.8754	-0.3662	1	34	18.3364
61	Energy & fuels	0	-0.1608	-0.4942	3	59	45.7275
62	Engineering, aerospace	0	-0.2507	-0.6233	5	29	17.2263
65	Engineering, civil	0	-0.2534	-0.5386	4	54	31.1204
66	Engineering, electrical & electronic	0	-0.2638	-0.6243	5	49	33.7557
68	Engineering, geological	0	-0.253	-0.5097	4	24	14.0801
69	Engineering, industrial	0	-0.5188	-0.6965	5	31	18.5886
70	Engineering, manufacturing	0	-0.2898	-0.6152	5	50	28.4379
71	Engineering, marine	0	-0.2341	-0.5619	4	30	19.1518
72	Engineering, mechanical	0	-0.1844	-0.5562	3	52	32.9489
73	Engineering, multidisciplinary	0	-0.2441	-0.6011	5	68	45.8382
74	Engineering, ocean	0	-0.2537	-0.5395	4	39	23.0671
75	Engineering, petroleum	0	-0.181	-0.4852	3	52	30.0121
78	Environmental studies	0	-0.67	-0.6664	2	53	31.6893
79	Ergonomics	0	-0.8202	-0.636	2	48	24.2326
80	Ethics	0	-0.8326	-0.6949	2	36	21.3267
81	Ethnic studies	0	-0.8758	-0.68	2	43	27.625
82	Evolutionary biology	0	-0.5389	-0.3576	4	53	36.2997
83	Family studies	0	-0.9473	-0.6018	2	39	28.2386
84	Fisheries	0	-0.4891	-0.3533	4	29	15.3045
86	Forestry	0	-0.4253	-0.412	4	35	22.3782
89	Geochemistry & geophysics	0	-0.2889	-0.4986	4	19	14.6476
90	Geography	0	-0.7698	-0.7335	2	30	17.9782
91	Geography, physical	0	-0.3468	-0.4908	4	37	25.2579
92	Geology	0	-0.2967	-0.4958	4	18	14.8757
93	Geosciences, multidisciplinary	0	-0.3104	-0.4929	4	29	22.9887
96	Green & sustainable science & technology	0	-0.2474	-0.4917	3	74	46.6562
98	Health policy & services	0	-0.9035	-0.5542	2	51	33.8194
100	History	0	-0.8138	-0.7597	2	20	11.2982
101	History & philosophy of science	0	-0.8293	-0.6976	2	6	2.101
102	History of social sciences	0	-0.8098	-0.7468	2	31	21.6672
103	Horticulture	0	-0.5109	-0.3045	4	34	21.7347
104	Hospitality, leisure, sport & tourism	0	-0.8147	-0.7134	2	27	15.0894
105	Imaging science & photographic technology	0	-0.293	-0.5704	4	37	21.0213
107	Industrial relations & labor	0	-0.7975	-0.7347	2	40	26.6838
109	Information science & library science	0	-0.7033	-0.7163	2	22	13.1502
110	Instruments & instrumentation	0	-0.2142	-0.5663	3	70	48.4793
112	International relations	0	-0.8309	-0.7556	2	23	15.0873
113	Law	0	-0.8694	-0.743	2	6	2.3325
114	Limnology	0	-0.3501	-0.4493	4	39	28.0012
115	Linguistics	0	-0.9221	-0.5657	2	15	8.7799
116	Logic	0	-0.2775	-0.6958	5	13	8.5865
117	Management	0	-0.7644	-0.7319	2	29	20.0659
118	Marine & freshwater biology	0	-0.4317	-0.393	4	39	25.0366
120	Materials science, ceramics	0	-0.1253	-0.4884	3	48	41.9911
121	Materials science, characterization & testing	0	-0.1664	-0.527	3	56	43.3581
122	Materials science, coatings & films	0	-0.1289	-0.4833	3	50	45.9202
123	Materials science, composites	0	-0.156	-0.5161	3	49	32.7411
125	Materials science, paper & wood	0	-0.2186	-0.4259	3	53	29.798
126	Materials science, textiles	0	-0.1678	-0.4523	3	56	42.9871
128	Mathematics	0	-0.2607	-0.6952	5	5	4.958
129	Mathematics, applied	0	-0.2799	-0.6882	5	18	11.8328
130	Mathematics, interdisciplinary applications	0	-0.3642	-0.651	5	64	38.4034
131	Mechanics	0	-0.1729	-0.5578	3	51	33.3403
132	Medical ethics	0	-0.89	-0.5192	2	37	20.4851
133	Medical informatics	0	-0.7719	-0.5153	2	70	35.0637
138	Metallurgy & metallurgical engineering	0	-0.1216	-0.4943	3	44	35.394
139	Meteorology & atmospheric sciences	0	-0.3123	-0.4778	4	29	17.2144
142	Mineralogy	0	-0.2259	-0.4879	4	41	21.887
143	Mining & mineral processing	0	-0.1739	-0.5006	3	57	35.4708
147	Neuroimaging	0	-0.8434	-0.4349	1	48	31.9984
150	Nursing	0	-0.936	-0.5112	2	27	13.9739
153	Oceanography	0	-0.3567	-0.4512	4	33	23.0144
155	Operations research & management science	0	-0.4707	-0.7013	5	31	20.023
157	Optics	0	-0.1628	-0.5517	3	51	28.6932
158	Ornithology	0	-0.4839	-0.4002	4	28	18.3458
161	Paleontology	0	-0.3425	-0.4754	4	28	15.6515
168	Physics, atomic, molecular & chemical	0	-0.1358	-0.4774	3	52	38.4973
170	Physics, fluids & plasmas	0	-0.132	-0.5586	3	42	24.1494
171	Physics, mathematical	0	-0.138	-0.5989	3	37	20.7528
172	Physics, multidisciplinary	0	-0.0829	-0.5453	3	45	29.8019
173	Physics, nuclear	0	-0.0446	-0.5648	3	20	11.1363
174	Physics, particles & fields	0	-0.0282	-0.5722	3	6	5.3817
176	Planning & development	0	-0.7821	-0.7485	2	34	27.4156
178	Political science	0	-0.8368	-0.753	2	23	14.4453
179	Polymer science	0	-0.1629	-0.4534	3	53	38.7295
180	Primary health care	0	-0.8848	-0.421	1	57	32.6833
182	Psychology	0	-0.9022	-0.5125	2	62	44.7905
183	Psychology, applied	0	-0.8342	-0.6906	2	35	23.2091
184	Psychology, biological	0	-0.8695	-0.4881	2	60	39.0556
185	Psychology, clinical	0	-0.9498	-0.5662	2	40	31.1627
186	Psychology, developmental	0	-0.9469	-0.5805	2	41	28.6666
187	Psychology, educational	0	-0.9395	-0.6041	2	29	18.0976
188	Psychology, experimental	0	-0.9003	-0.54	2	43	29.0436
189	Psychology, mathematical	0	-0.8652	-0.6066	2	23	13.8227
190	Psychology, multidisciplinary	0	-0.9168	-0.5957	2	55	40.7651
191	Psychology, psychoanalysis	0	-0.975	-0.5862	2	16	8.1994
192	Psychology, social	0	-0.9124	-0.6439	2	37	23.5133
193	Public administration	0	-0.8159	-0.7502	2	29	18.8849
197	Remote sensing	0	-0.3028	-0.5384	4	36	18.9856
198	Reproductive biology	0	-0.6972	-0.2711	1	39	22.1239
201	Robotics	0	-0.3217	-0.6371	5	34	19.5145
202	Social issues	0	-0.8918	-0.6514	2	57	35.4665
203	Social sciences, biomedical	0	-0.8946	-0.5603	2	51	34.9581
204	Social sciences, interdisciplinary	0	-0.8648	-0.659	2	64	43.5465
205	Social sciences, mathematical methods	0	-0.7479	-0.7393	2	28	19.9194
206	Social work	0	-0.9434	-0.6017	2	40	27.0844
207	Sociology	0	-0.8507	-0.7073	2	40	24.63
208	Soil science	0	-0.394	-0.4144	4	36	21.7716
212	Substance abuse	0	-0.9458	-0.5513	2	39	24.8251
214	Telecommunications	0	-0.3032	-0.6664	5	19	17.2613
215	Thermodynamics	0	-0.1531	-0.5244	3	49	30.898
218	Transportation	0	-0.7232	-0.7185	2	38	21.3892
219	Transportation science & technology	0	-0.4539	-0.683	5	38	21.57
221	Urban studies	0	-0.7549	-0.7246	2	30	18.8495
226	Womens studies	0	-0.8939	-0.626	2	57	36.1221

## Sheet: net
1	14	1.1041
1	15	0.3793
1	37	0.3172
1	38	0.3022
1	39	0.3049
1	41	0.5736
1	61	0.313
1	62	0.6006
1	63	0.444
1	65	0.3935
1	66	0.4488
1	70	0.341
1	71	0.6035
1	72	0.9182
1	73	0.7667
1	74	0.5216
1	110	0.5222
1	121	0.572
1	123	0.468
1	130	0.5771
1	131	0.9013
1	147	0.3103
1	152	0.3727
1	160	0.3392
1	167	0.3081
1	170	0.4402
1	195	0.6252
1	201	0.3735
1	215	0.522
2	12	0.5795
2	23	0.4614
2	24	1.3586
2	49	0.7274
2	54	1.8205
2	78	1.0908
2	80	0.3267
2	90	0.7657
2	98	0.344
2	100	0.6684
2	102	1.4001
2	107	0.869
2	112	0.7367
2	117	0.389
2	130	0.5577
2	176	1.4026
2	178	0.5029
2	193	0.6264
2	204	0.4247
2	205	1.5027
2	207	0.3941
2	211	0.4217
2	218	0.8024
2	219	0.5133
2	221	0.918
3	4	0.3151
3	5	1.0133
3	6	0.8303
3	17	0.6345
3	18	0.4696
3	19	0.3116
3	20	0.4477
3	21	0.4655
3	22	1.31
3	26	0.4012
3	28	0.5194
3	29	0.9871
3	31	0.4681
3	32	0.4885
3	33	0.3482
3	34	0.4443
3	41	0.3703
3	44	0.3518
3	53	0.3712
3	58	0.6052
3	61	1.2
3	64	1.1257
3	65	0.507
3	67	1.1041
3	72	0.3881
3	73	0.3666
3	75	0.9819
3	76	0.3347
3	77	0.9389
3	78	0.3759
3	85	0.8184
3	86	0.4394
3	88	0.4484
3	96	1.3254
3	103	0.6359
3	111	0.3925
3	114	0.6276
3	118	0.3886
3	119	0.4418
3	122	0.3479
3	124	0.3249
3	125	1.0146
3	126	0.5833
3	127	0.5233
3	131	0.3124
3	137	0.3508
3	139	0.3101
3	140	0.5912
3	144	0.5421
3	145	0.6223
3	146	0.3402
3	151	0.43
3	166	0.3661
3	177	0.5233
3	179	0.4916
3	208	0.6288
3	209	0.4852
3	215	0.7462
3	216	0.577
3	224	0.3082
3	225	0.821
4	5	0.9046
4	9	0.4712
4	17	0.3286
4	18	0.392
4	20	0.4197
4	21	0.3326
4	22	0.4617
4	27	0.3342
4	29	0.5164
4	52	0.3953
4	60	0.3279
4	85	0.8999
4	88	0.417
4	103	0.3303
4	137	0.3377
4	140	0.3657
4	144	0.4093
4	145	0.3834
4	151	0.5694
4	162	0.35
4	198	0.613
4	216	0.3213
4	223	1.0723
4	227	0.3249
5	6	1.5463
5	17	0.7069
5	18	0.6829
5	19	0.6049
5	20	0.7158
5	21	0.5911
5	22	0.9373
5	26	0.3475
5	27	0.4697
5	28	0.533
5	29	1.2211
5	31	0.6618
5	33	0.3282
5	41	0.3098
5	52	0.4033
5	53	0.6834
5	60	0.3327
5	64	0.3996
5	67	0.5799
5	76	0.6095
5	77	0.7573
5	78	0.3544
5	82	0.5741
5	84	0.312
5	85	1.5129
5	86	0.7848
5	88	0.6683
5	91	0.3146
5	96	0.5295
5	103	1.437
5	111	0.7562
5	114	0.5113
5	118	0.4851
5	119	0.316
5	125	0.5055
5	126	0.3447
5	127	0.5047
5	134	0.4108
5	137	0.46
5	139	0.3192
5	140	0.556
5	141	0.3188
5	144	0.7305
5	145	0.8201
5	151	0.9459
5	153	0.3178
5	158	0.3903
5	162	0.3604
5	166	0.4999
5	175	0.3542
5	177	1.1828
5	208	1.0121
5	209	0.4709
5	216	0.7275
5	223	0.4723
5	224	0.3645
5	225	0.5302
5	227	0.4374
6	17	0.4852
6	18	0.5229
6	19	0.5805
6	20	0.6112
6	21	0.4009
6	22	0.7647
6	27	0.356
6	29	0.567
6	31	0.4618
6	52	0.3364
6	53	0.6906
6	67	0.4448
6	76	0.6164
6	77	0.6287
6	82	0.6451
6	85	0.6057
6	86	0.9709
6	88	0.732
6	91	0.3144
6	96	0.4267
6	103	1.7833
6	111	0.6155
6	114	0.4572
6	118	0.4149
6	125	0.3924
6	127	0.4055
6	137	0.3058
6	139	0.3152
6	140	0.3945
6	144	0.6195
6	145	0.7889
6	151	0.3601
6	158	0.3359
6	166	0.3045
6	177	1.5763
6	208	1.1937
6	216	0.4576
6	225	0.4968
6	227	0.367
7	18	0.3319
7	20	0.3279
7	22	0.305
7	26	0.3525
7	27	0.4044
7	46	0.4792
7	51	0.5591
7	99	0.4497
7	106	1.5092
7	108	0.7988
7	134	0.4718
7	135	0.5091
7	137	0.6721
7	140	0.4519
7	144	0.4729
7	162	0.541
7	163	0.4317
7	164	0.5194
7	166	0.3883
7	180	0.3223
7	199	0.6931
7	200	0.3265
7	217	0.7127
7	220	0.5318
7	223	0.318
7	224	0.6307
8	9	0.522
8	10	0.6952
8	11	0.3101
8	14	0.6503
8	16	1.5725
8	17	0.6541
8	18	0.9227
8	19	0.319
8	20	1.226
8	21	0.8435
8	22	0.5943
8	26	0.9612
8	27	1.0024
8	31	0.5665
8	35	1.2395
8	38	0.3996
8	41	0.306
8	46	0.458
8	50	0.3163
8	52	1.2013
8	53	0.3789
8	60	0.8498
8	63	0.7804
8	76	0.4119
8	82	0.6286
8	87	0.327
8	88	0.8533
8	94	1.0779
8	95	0.3742
8	99	0.4577
8	106	0.508
8	111	0.6195
8	119	0.4272
8	127	0.9814
8	133	0.3298
8	134	0.7643
8	135	0.5724
8	137	1.0546
8	140	0.3356
8	141	0.7582
8	144	1.2031
8	145	0.4049
8	147	1.5584
8	148	1.7365
8	151	0.4299
8	154	0.5478
8	156	0.3822
8	158	0.3735
8	159	0.4361
8	160	0.5153
8	162	0.3708
8	163	0.9315
8	164	0.5052
8	165	0.5023
8	166	0.9452
8	175	1.3953
8	177	0.3495
8	181	0.6064
8	182	1.2065
8	184	1.3284
8	185	0.3105
8	188	0.9644
8	190	0.4447
8	195	0.812
8	196	0.5696
8	198	0.4763
8	199	0.3412
8	201	0.3299
8	210	0.5005
8	212	0.317
8	213	0.5484
8	216	0.6173
8	217	0.4448
8	223	0.3245
8	224	0.4408
8	227	0.8114
9	17	0.5133
9	18	0.7988
9	20	0.7756
9	21	0.7107
9	22	0.5618
9	26	0.7209
9	27	0.8674
9	31	0.4871
9	52	1.0584
9	60	0.9235
9	63	0.3072
9	82	0.3659
9	88	0.787
9	94	0.4197
9	99	0.4501
9	106	0.4422
9	111	0.4495
9	127	0.5274
9	134	0.7973
9	135	0.5813
9	137	0.9004
9	140	0.3317
9	141	0.4706
9	144	0.8013
9	145	0.3964
9	151	0.489
9	152	1.3679
9	154	0.6258
9	162	0.3381
9	163	0.7187
9	164	0.415
9	165	0.3929
9	166	0.5641
9	175	0.6733
9	177	0.3192
9	198	1.7901
9	216	0.5997
9	217	0.4254
9	222	1.0545
9	223	0.4269
9	224	0.4032
9	227	0.3032
10	16	0.6418
10	20	0.319
10	25	0.5339
10	26	0.3261
10	35	0.9928
10	46	1.0094
10	59	0.747
10	60	0.3662
10	63	0.3802
10	94	0.6561
10	95	0.3492
10	97	0.4277
10	99	0.3276
10	111	0.425
10	127	0.3021
10	133	0.3564
10	134	0.4719
10	135	0.8159
10	137	0.5618
10	144	0.4188
10	147	0.7375
10	148	0.803
10	159	0.4352
10	160	0.3488
10	163	0.4234
10	164	0.6225
10	165	0.6762
10	166	0.5496
10	175	0.6191
10	180	0.4951
10	181	0.3663
10	182	0.5758
10	184	0.5442
10	188	0.3917
10	195	0.3794
10	196	0.5146
10	199	0.6454
10	210	0.3702
10	213	0.6113
10	217	0.4105
11	12	0.3534
11	19	0.3175
11	20	0.4414
11	48	0.6769
11	49	0.3072
11	53	0.3767
11	81	0.4133
11	82	0.6514
11	88	0.3156
11	89	0.3046
11	91	0.5581
11	92	0.3936
11	93	0.5208
11	144	0.3498
11	158	0.3021
11	161	0.4804
11	203	0.3955
11	204	0.3572
11	207	0.3723
11	226	0.3129
11	227	0.4011
12	24	0.4186
12	36	0.3493
12	48	0.7887
12	49	0.636
12	54	0.6293
12	78	0.5791
12	81	0.7816
12	90	0.6358
12	100	0.7704
12	102	0.6441
12	107	0.4109
12	112	1.3577
12	176	0.8529
12	178	1.4288
12	193	0.8574
12	202	0.511
12	204	0.5227
12	205	0.4519
12	207	0.6955
12	218	0.3124
12	221	0.5633
12	226	0.4471
13	171	0.3765
13	172	0.7044
13	173	0.9828
13	174	1.4737
14	16	0.7152
14	35	0.5704
14	57	0.6961
14	94	0.4696
14	115	0.9475
14	144	0.3287
14	147	0.6884
14	148	0.7579
14	160	1.0772
14	175	0.4931
14	181	0.3023
14	182	0.743
14	184	0.7058
14	186	0.3438
14	187	0.3011
14	188	0.791
14	189	0.3958
14	190	0.4482
14	195	0.3236
14	196	0.9915
15	37	1.2206
15	38	1.2077
15	39	1.2159
15	40	1.0123
15	41	0.8521
15	42	0.8301
15	43	1.1041
15	62	0.774
15	66	1.4593
15	69	0.6172
15	70	0.8824
15	71	0.3706
15	72	0.5044
15	73	1.1462
15	74	0.3401
15	105	0.6318
15	110	1.218
15	121	0.3087
15	129	0.4499
15	130	0.9276
15	131	0.3671
15	155	0.7297
15	157	0.3874
15	197	0.4062
15	201	1.2399
15	214	1.0739
15	219	0.6063
16	17	0.3819
16	18	0.506
16	19	0.3776
16	20	0.9031
16	21	0.4243
16	26	0.4226
16	27	0.4786
16	31	0.4353
16	35	1.2787
16	38	0.466
16	46	0.3214
16	52	0.6068
16	53	0.4378
16	57	0.3546
16	60	0.6629
16	63	0.4212
16	76	0.3612
16	79	0.3342
16	82	0.495
16	83	0.3382
16	88	0.4648
16	94	1.1213
16	95	0.6177
16	111	0.5945
16	115	0.4066
16	127	0.7026
16	133	0.3019
16	134	0.4424
16	135	0.4698
16	137	0.635
16	141	0.3706
16	144	0.8601
16	147	1.5604
16	148	1.7925
16	151	0.4352
16	158	0.5203
16	160	0.349
16	163	0.4878
16	164	0.4642
16	166	0.9247
16	175	1.1887
16	181	1.0396
16	182	1.6513
16	184	1.8756
16	185	0.7518
16	186	0.6155
16	188	1.3673
16	189	0.5153
16	190	0.9357
16	192	0.306
16	195	0.5289
16	196	0.6292
16	201	0.3061
16	203	0.3035
16	206	0.3031
16	210	0.3688
16	212	0.6307
16	216	0.4694
16	227	0.9121
17	18	1.4532
17	20	1.2222
17	21	1.5247
17	22	1.4338
17	26	0.9554
17	27	1.1851
17	28	1.4735
17	29	0.8575
17	30	0.4724
17	31	1.1159
17	32	0.7277
17	33	0.5936
17	34	0.5263
17	41	0.5709
17	47	0.6614
17	52	0.9814
17	53	0.3355
17	58	0.6086
17	60	0.6928
17	61	0.344
17	63	0.6723
17	64	0.4148
17	67	0.3477
17	76	0.4864
17	77	0.3671
17	82	0.6857
17	85	0.6735
17	88	1.1985
17	94	0.4756
17	96	0.3523
17	99	0.4857
17	103	0.5514
17	106	0.6704
17	108	0.458
17	110	0.645
17	111	0.8035
17	118	0.3207
17	119	0.8367
17	122	0.3583
17	124	0.4331
17	125	0.4641
17	126	0.5099
17	127	1.4209
17	133	0.3515
17	134	0.9294
17	135	0.3557
17	136	0.4839
17	137	1.1317
17	140	0.9027
17	141	0.8955
17	144	1.3958
17	145	0.97
17	146	0.5718
17	147	0.311
17	148	0.4969
17	151	0.6138
17	154	0.6274
17	157	0.3473
17	162	0.6561
17	163	0.7562
17	165	0.344
17	166	1.0224
17	167	0.4113
17	168	0.4838
17	169	0.3944
17	175	0.8132
17	177	0.7608
17	179	0.4906
17	195	0.3311
17	198	0.4322
17	209	1.2608
17	216	0.9323
17	217	0.3286
17	220	0.4706
17	223	0.3632
17	224	0.8332
17	227	0.4255
18	19	0.3336
18	20	1.639
18	21	1.8918
18	22	1.466
18	26	1.3936
18	27	1.846
18	28	0.5689
18	29	0.7271
18	30	0.3523
18	31	1.3702
18	32	0.5337
18	33	0.5836
18	34	0.3261
18	35	0.3855
18	41	0.473
18	47	0.5285
18	51	0.3983
18	52	1.5584
18	53	0.4346
18	60	1.0991
18	63	0.6773
18	76	0.6575
18	82	0.9241
18	84	0.3919
18	85	0.5463
18	87	0.3734
18	88	1.658
18	94	0.716
18	99	0.7686
18	103	0.6363
18	106	0.9355
18	108	0.4974
18	111	0.9918
18	118	0.3842
18	119	0.7963
18	125	0.3748
18	126	0.3672
18	127	1.3854
18	134	1.1747
18	135	0.5074
18	136	0.3965
18	137	1.598
18	140	0.992
18	141	0.9791
18	144	1.7537
18	145	1.1505
18	146	0.3278
18	147	0.3284
18	148	0.6654
18	151	0.7747
18	152	0.311
18	154	0.9949
18	162	0.819
18	163	1.1491
18	164	0.3054
18	165	0.5424
18	166	1.2421
18	168	0.3103
18	175	1.2307
18	177	0.9847
18	179	0.3959
18	184	0.386
18	198	0.6664
18	199	0.4074
18	209	0.617
18	216	1.1212
18	217	0.4809
18	220	0.542
18	222	0.3191
18	223	0.4275
18	224	1.0431
18	227	0.6142
19	20	0.9897
19	22	0.3513
19	53	1.9536
19	67	0.5922
19	76	0.9445
19	77	1.0055
19	78	0.6915
19	82	1.3878
19	84	0.7294
19	86	1.2907
19	88	0.605
19	90	0.3001
19	91	0.743
19	93	0.462
19	96	0.4664
19	103	0.3677
19	114	0.9919
19	118	1.2509
19	127	0.4223
19	139	0.4312
19	144	0.6888
19	145	0.454
19	153	0.9988
19	158	1.6063
19	161	0.524
19	162	0.3132
19	177	0.6141
19	197	0.3764
19	208	0.839
19	216	0.4773
19	221	0.4334
19	225	0.5947
19	227	1.4085
20	21	1.5222
20	22	1.3001
20	26	1.2762
20	27	1.5698
20	28	0.4316
20	29	0.4965
20	31	1.001
20	32	0.3693
20	33	0.3341
20	35	0.5117
20	41	0.5335
20	46	0.3186
20	47	0.3363
20	51	0.3611
20	52	1.4683
20	53	1.1195
20	60	1.0356
20	63	0.733
20	67	0.3206
20	76	0.9669
20	77	0.5418
20	82	1.4338
20	84	0.6182
20	85	0.4275
20	86	0.6427
20	87	0.3581
20	88	1.63
20	91	0.4127
20	94	0.7923
20	99	0.7001
20	101	0.3165
20	103	0.6382
20	106	0.886
20	108	0.5247
20	111	0.8125
20	114	0.4768
20	118	0.7924
20	119	0.6537
20	127	1.551
20	133	0.4563
20	134	1.0519
20	135	0.5707
20	136	0.4388
20	137	1.4489
20	140	0.9199
20	141	0.9442
20	144	1.8149
20	145	1.0679
20	147	0.5928
20	148	0.8649
20	151	0.6981
20	152	0.3612
20	153	0.5508
20	154	0.8667
20	158	0.9184
20	161	0.4063
20	162	0.8514
20	163	1.0521
20	164	0.3789
20	165	0.5353
20	166	1.0616
20	175	1.3573
20	177	0.9568
20	182	0.523
20	184	0.7151
20	188	0.4006
20	195	0.4595
20	198	0.6776
20	199	0.413
20	208	0.4501
20	209	0.4573
20	216	1.0414
20	217	0.4749
20	220	0.5948
20	222	0.3165
20	223	0.4928
20	224	0.9568
20	227	1.2563
21	22	1.3908
21	26	1.3157
21	27	1.693
21	28	0.8342
21	29	0.8556
21	30	0.5753
21	31	1.3004
21	32	0.8531
21	33	0.6891
21	34	0.6734
21	35	0.3544
21	41	0.5983
21	47	0.8236
21	51	0.3687
21	52	1.3891
21	53	0.3302
21	58	0.5923
21	60	0.9933
21	61	0.3824
21	63	0.936
21	64	0.4234
21	67	0.3103
21	76	0.5552
21	77	0.3159
21	82	0.7387
21	84	0.3285
21	85	0.509
21	87	0.3376
21	88	1.4281
21	94	0.6479
21	96	0.3497
21	99	0.6823
21	103	0.479
21	106	0.7919
21	108	0.4024
21	110	0.4593
21	111	0.865
21	118	0.3195
21	119	1.0749
21	120	0.3865
21	122	0.4474
21	124	0.5467
21	125	0.448
21	126	0.5891
21	127	1.3625
21	133	0.3074
21	134	1.0706
21	135	0.4584
21	136	0.354
21	137	1.4704
21	140	0.8701
21	141	1.1317
21	144	1.6776
21	145	0.9886
21	146	0.6689
21	147	0.3262
21	148	0.5941
21	151	0.6979
21	154	0.9056
21	162	0.7139
21	163	1.0333
21	165	0.5206
21	166	1.1589
21	167	0.4948
21	168	0.6069
21	169	0.4931
21	172	0.3467
21	175	1.1596
21	177	0.8156
21	179	0.5992
21	184	0.3267
21	195	0.3696
21	198	0.5871
21	199	0.3791
21	209	0.9015
21	216	1.0493
21	217	0.4294
21	220	0.4669
21	223	0.3643
21	224	0.924
21	227	0.5001
22	26	1.2062
22	27	1.2572
22	28	0.724
22	29	0.8935
22	30	0.3251
22	31	1.0423
22	32	0.5828
22	33	0.4873
22	34	0.4175
22	41	0.4781
22	47	0.4671
22	51	0.3312
22	52	1.0394
22	53	0.474
22	58	0.4716
22	60	0.7046
22	61	0.5657
22	63	0.6764
22	64	0.6028
22	67	0.5998
22	75	0.3893
22	76	0.6196
22	77	0.5915
22	82	0.8101
22	84	0.3847
22	85	0.8435
22	86	0.367
22	87	0.3196
22	88	1.4076
22	94	0.467
22	96	0.6186
22	99	0.6118
22	103	0.828
22	106	0.8429
22	108	0.7467
22	110	0.3401
22	111	0.7917
22	114	0.3495
22	118	0.4729
22	119	0.8365
22	124	0.338
22	125	0.6892
22	126	0.4737
22	127	1.3351
22	133	0.3278
22	134	0.9657
22	135	0.4617
22	136	0.402
22	137	1.2836
22	140	1.4209
22	141	0.7788
22	144	1.4848
22	145	1.3855
22	146	0.4331
22	148	0.3886
22	151	0.6796
22	154	0.7403
22	162	0.8279
22	163	0.8643
22	165	0.3937
22	166	0.9896
22	167	0.3014
22	168	0.3144
22	175	0.7834
22	177	0.9448
22	179	0.4574
22	198	0.4777
22	199	0.3566
22	208	0.4515
22	209	0.6488
22	216	0.978
22	217	0.4622
22	220	0.6318
22	223	0.5078
22	224	1.0694
22	225	0.3713
22	227	0.4815
23	24	0.4714
23	36	0.6343
23	38	0.3663
23	54	0.525
23	69	0.5995
23	78	0.5606
23	79	0.4167
23	80	1.4081
23	90	0.3115
23	102	0.6213
23	104	0.9983
23	107	1.4134
23	109	0.9959
23	117	1.8814
23	155	0.5122
23	176	1.0581
23	183	1.3735
23	190	0.3429
23	192	0.4264
23	193	0.7466
23	202	0.3822
23	204	0.636
23	205	0.3771
23	207	0.3756
23	218	0.3787
23	221	0.306
24	49	0.5427
24	54	1.6865
24	78	0.7
24	80	0.3749
24	90	0.4987
24	100	0.5387
24	102	1.163
24	107	0.7327
24	112	0.6578
24	117	0.4097
24	130	0.5117
24	176	1.0591
24	178	0.4005
24	193	0.5628
24	204	0.3122
24	205	1.3813
24	211	0.3452
24	218	0.607
24	219	0.3929
24	221	0.6817
25	26	0.4381
25	27	0.3466
25	46	0.6912
25	59	0.6745
25	60	0.4391
25	63	0.4828
25	94	0.3927
25	97	0.3342
25	99	0.557
25	133	0.3235
25	134	0.6909
25	135	0.9542
25	137	0.6524
25	144	0.3793
25	151	0.3491
25	163	0.3846
25	164	0.4634
25	165	1.5136
25	166	0.4336
25	175	0.6518
25	180	0.4869
25	195	0.4457
25	199	1.0859
25	213	0.6079
25	217	0.6294
26	27	1.6845
26	29	0.3576
26	31	0.7852
26	32	0.3044
26	35	0.4463
26	41	0.3256
26	46	0.4031
26	51	0.4619
26	52	1.4928
26	60	0.9118
26	63	1.0742
26	76	0.3633
26	82	0.5064
26	87	0.426
26	88	1.2228
26	94	0.6781
26	99	1.1822
26	103	0.3238
26	106	0.9311
26	108	0.3775
26	111	0.6536
26	119	0.9656
26	127	1.0371
26	133	0.3297
26	134	1.1322
26	135	0.6223
26	137	1.6055
26	140	0.6457
26	141	0.9374
26	144	1.4034
26	145	0.7206
26	147	0.3627
26	148	0.6055
26	151	0.5257
26	152	0.3311
26	154	1.0559
26	159	0.3693
26	160	0.3217
26	162	0.5673
26	163	1.2108
26	164	0.3944
26	165	0.7339
26	166	0.9356
26	175	1.0941
26	177	0.5478
26	184	0.3317
26	195	0.3666
26	198	0.6211
26	199	0.489
26	200	0.3886
26	210	0.3198
26	213	0.479
26	216	0.7603
26	217	0.8965
26	220	0.3806
26	222	0.37
26	223	0.3429
26	224	0.812
26	227	0.3758
27	28	0.3411
27	29	0.4304
27	31	1.0826
27	32	0.3028
27	33	0.319
27	35	0.4061
27	41	0.3539
27	46	0.3195
27	47	0.3
27	51	0.4763
27	52	1.7312
27	53	0.3131
27	60	1.1137
27	63	0.6923
27	76	0.5139
27	82	0.7396
27	84	0.3219
27	85	0.3579
27	87	0.4494
27	88	1.5726
27	94	0.7572
27	99	0.9927
27	103	0.4682
27	106	1.0378
27	108	0.464
27	111	0.833
27	119	0.6848
27	127	1.2104
27	134	1.2567
27	135	0.592
27	136	0.3305
27	137	1.7264
27	140	0.8133
27	141	0.9899
27	144	1.6813
27	145	0.9506
27	147	0.3414
27	148	0.6672
27	151	0.6765
27	152	0.3865
27	154	1.2613
27	162	0.7493
27	163	1.3821
27	164	0.3543
27	165	0.6184
27	166	1.1119
27	175	1.2699
27	177	0.8005
27	182	0.3028
27	184	0.3712
27	195	0.3418
27	198	0.7327
27	199	0.4879
27	200	0.3227
27	209	0.3713
27	216	0.9849
27	217	0.6411
27	220	0.4892
27	222	0.3863
27	223	0.3999
27	224	1.0096
27	227	0.5164
28	29	0.9525
28	30	0.6799
28	31	0.6291
28	32	0.9868
28	33	0.6072
28	34	0.8679
28	41	0.405
28	47	0.796
28	58	1.1845
28	61	0.6273
28	63	0.4265
28	64	0.6701
28	67	0.523
28	75	0.3683
28	77	0.4367
28	85	0.621
28	88	0.3467
28	96	0.5492
28	110	1.0784
28	111	0.4318
28	119	0.7737
28	120	0.6174
28	121	0.4478
28	122	0.7534
28	123	0.3462
28	124	0.7858
28	125	0.4966
28	126	0.7472
28	127	0.554
28	134	0.4291
28	136	0.3811
28	137	0.4027
28	138	0.4724
28	140	0.3102
28	141	0.6876
28	143	0.3624
28	144	0.619
28	145	0.3428
28	146	0.9028
28	149	0.4536
28	151	0.3797
28	157	0.379
28	166	0.5585
28	167	0.7181
28	168	0.6684
28	169	0.684
28	172	0.3303
28	179	0.6592
28	209	1.6274
28	215	0.3787
28	216	0.5717
29	30	0.9648
29	31	0.9467
29	32	1.3022
29	33	1.1527
29	34	1.1799
29	41	0.4463
29	47	1.0248
29	52	0.3175
29	58	1.0086
29	60	0.3028
29	61	0.9454
29	63	0.4773
29	64	1.2233
29	67	0.733
29	72	0.3429
29	73	0.3494
29	75	0.7676
29	77	0.4985
29	85	1.4851
29	88	0.4248
29	96	0.8809
29	103	0.5962
29	110	0.5837
29	111	0.6808
29	119	0.9915
29	120	0.769
29	121	0.5703
29	122	0.9043
29	123	0.54
29	124	0.9647
29	125	1.0064
29	126	1.3278
29	127	0.4983
29	131	0.3033
29	134	0.3961
29	137	0.4866
29	138	0.5632
29	140	0.4345
29	141	0.7264
29	142	0.3419
29	143	0.4652
29	144	0.7209
29	145	0.5261
29	146	1.0331
29	149	0.3765
29	151	0.9107
29	157	0.3405
29	166	0.6737
29	167	0.8233
29	168	0.8893
29	169	0.8141
29	172	0.39
29	175	0.3081
29	177	0.4613
29	179	1.2101
29	209	1.0689
29	215	0.571
29	216	0.6597
29	225	0.3498
30	31	0.6257
30	32	1.575
30	33	1.4628
30	34	1.2064
30	41	0.3539
30	47	1.7123
30	58	0.8913
30	61	0.6567
30	63	0.3561
30	64	0.7073
30	67	0.3924
30	75	0.3682
30	96	0.6141
30	110	0.5326
30	119	0.8451
30	120	0.7367
30	121	0.4536
30	122	0.8011
30	123	0.3539
30	124	1.0219
30	125	0.4584
30	126	1.0384
30	138	0.5107
30	141	0.5988
30	143	0.3689
30	144	0.4269
30	146	1.1299
30	149	0.4484
30	157	0.3728
30	166	0.3505
30	167	0.8912
30	168	0.9434
30	169	0.8787
30	172	0.4136
30	179	0.8678
30	209	0.9259
30	215	0.3098
31	32	0.7657
31	33	1.1525
31	34	0.4051
31	35	0.3359
31	41	0.4891
31	47	0.6582
31	52	0.8146
31	60	0.7372
31	63	0.5514
31	64	0.3003
31	76	0.3915
31	82	0.4838
31	85	0.6048
31	87	0.3168
31	88	0.9261
31	94	0.5012
31	99	0.5169
31	103	0.4874
31	106	0.6371
31	108	0.4655
31	111	1.6369
31	119	0.8217
31	125	0.3911
31	126	0.5037
31	127	0.9171
31	134	0.9932
31	135	0.4692
31	136	0.3633
31	137	1.1753
31	140	0.7373
31	141	0.6356
31	144	1.1698
31	145	0.8095
31	146	0.4154
31	148	0.5239
31	151	0.6651
31	154	0.7289
31	162	0.5535
31	163	0.773
31	165	0.3884
31	166	1.623
31	168	0.3252
31	175	0.817
31	177	0.8006
31	179	0.4813
31	184	0.353
31	198	0.3825
31	199	0.3207
31	209	0.6381
31	216	1.096
31	217	0.3277
31	220	0.448
31	223	0.3119
31	224	0.6675
31	227	0.3311
32	33	1.3783
32	34	1.7938
32	41	0.5131
32	44	0.3722
32	47	1.7774
32	58	1.46
32	61	1.1353
32	63	0.6016
32	64	1.1359
32	65	0.3221
32	66	0.3933
32	67	0.6629
32	70	0.4117
32	72	0.4001
32	73	0.4127
32	75	0.6411
32	77	0.397
32	85	0.3132
32	96	0.9214
32	110	0.8784
32	111	0.327
32	119	1.309
32	120	1.294
32	121	0.9306
32	122	1.4465
32	123	0.721
32	124	1.6838
32	125	0.7333
32	126	1.4471
32	127	0.4328
32	130	0.309
32	131	0.414
32	137	0.3859
32	138	1.023
32	141	1.1128
32	142	0.4453
32	143	0.6937
32	144	0.7379
32	146	1.7984
32	149	0.5541
32	157	0.6711
32	166	0.5514
32	167	1.5371
32	168	1.3491
32	169	1.5036
32	170	0.4491
32	171	0.3519
32	172	0.7129
32	179	1.2978
32	209	1.2143
32	215	0.5527
32	216	0.4269
33	34	0.8272
33	41	0.3501
33	47	1.2165
33	58	0.5713
33	61	0.4233
33	63	0.368
33	64	0.5391
33	85	0.3592
33	96	0.5158
33	110	0.3524
33	111	0.5221
33	119	0.814
33	120	0.3587
33	122	0.4417
33	124	0.6391
33	125	0.5706
33	126	1.0114
33	127	0.3787
33	137	0.38
33	141	0.4315
33	144	0.5102
33	146	0.7775
33	166	0.622
33	167	0.5425
33	168	0.6098
33	169	0.5167
33	179	0.8288
33	209	0.7302
33	216	0.39
34	41	0.4778
34	44	0.4332
34	47	1.5049
34	58	1.6509
34	61	1.3168
34	63	0.5104
34	64	1.2653
34	65	0.3539
34	66	0.4345
34	67	0.7115
34	70	0.4672
34	72	0.4927
34	73	0.4922
34	75	0.7976
34	77	0.3771
34	96	0.9246
34	110	0.8988
34	119	1.1714
34	120	1.5216
34	121	1.0583
34	122	1.6833
34	123	0.8062
34	124	1.8131
34	125	0.691
34	126	1.3569
34	127	0.3008
34	130	0.3547
34	131	0.5039
34	138	1.2173
34	141	1.1485
34	142	0.5251
34	143	0.8326
34	144	0.6035
34	146	1.8531
34	149	0.6518
34	157	0.7849
34	166	0.3123
34	167	1.6478
34	168	1.6905
34	169	1.6606
34	170	0.5437
34	171	0.4799
34	172	0.8783
34	179	1.2359
34	209	1.2461
34	215	0.6953
35	46	0.6434
35	52	0.4177
35	57	0.3094
35	59	0.4744
35	60	0.5171
35	63	0.5241
35	83	0.3017
35	88	0.3386
35	94	1.259
35	95	0.7875
35	97	0.4497
35	98	0.3765
35	111	0.5512
35	127	0.4852
35	133	0.3792
35	134	0.5444
35	135	0.8124
35	137	0.7162
35	144	0.6519
35	147	1.5231
35	148	1.5203
35	151	0.3192
35	154	0.3253
35	159	0.6064
35	160	0.5599
35	163	0.6764
35	164	0.8014
35	165	0.618
35	166	0.8004
35	175	0.8565
35	180	0.4646
35	181	1.07
35	182	1.2838
35	184	1.0763
35	185	0.7446
35	186	0.4883
35	188	0.7925
35	190	0.5983
35	194	0.3133
35	195	0.6804
35	196	0.9598
35	199	0.3219
35	203	0.3031
35	210	0.4913
35	212	0.5561
35	213	0.7401
35	216	0.3543
35	217	0.3431
36	45	0.3445
36	48	0.8792
36	49	0.3527
36	79	0.3937
36	80	0.57
36	81	0.6524
36	83	0.4659
36	98	0.3377
36	104	0.4374
36	107	0.4631
36	109	0.5888
36	115	0.352
36	117	0.5411
36	176	0.3626
36	178	0.4564
36	183	0.6135
36	186	0.3151
36	187	0.3571
36	188	0.3442
36	190	0.6545
36	192	0.7977
36	193	0.4073
36	194	0.3116
36	202	0.5947
36	203	0.4096
36	204	0.8544
36	206	0.3969
36	207	0.66
36	226	0.6349
37	38	1.6799
37	39	1.3533
37	40	1.3739
37	41	1.1913
37	42	1.282
37	43	1.5532
37	62	0.4982
37	63	0.3595
37	66	1.2649
37	69	0.6075
37	70	0.5903
37	73	0.9468
37	105	0.7589
37	110	0.801
37	116	0.5881
37	127	0.4637
37	129	0.4589
37	130	0.8557
37	133	0.4714
37	155	0.8634
37	157	0.3434
37	197	0.448
37	201	1.1475
37	211	0.3958
37	214	0.9934
37	219	0.5892
38	39	1.2876
38	40	1.4045
38	41	1.086
38	42	1.2297
38	43	1.4448
38	62	0.4682
38	63	0.3834
38	66	1.1511
38	69	0.7312
38	70	0.6028
38	73	0.8439
38	79	0.7072
38	105	0.6279
38	107	0.3007
38	109	0.6635
38	110	0.7339
38	116	0.495
38	117	0.4251
38	127	0.4741
38	129	0.3733
38	130	0.7534
38	133	0.5093
38	147	0.4307
38	148	0.4692
38	155	0.8396
38	157	0.3112
38	175	0.3328
38	182	0.5193
38	183	0.4674
38	184	0.4989
38	188	0.5686
38	189	0.4019
38	190	0.491
38	192	0.3057
38	197	0.3674
38	201	1.1068
38	204	0.3573
38	214	0.9669
38	219	0.5722
39	40	1.7418
39	41	0.9255
39	42	1.4866
39	43	1.6865
39	62	0.5888
39	66	1.6745
39	69	0.3878
39	70	0.4088
39	73	0.8155
39	105	0.765
39	110	0.926
39	116	0.4784
39	129	0.3324
39	130	0.6416
39	133	0.3324
39	155	0.5752
39	157	0.5254
39	197	0.4886
39	201	0.7697
39	214	1.7185
39	219	0.6799
40	41	1.0757
40	42	1.4439
40	43	1.6197
40	62	0.5141
40	66	1.4224
40	69	0.4941
40	70	0.4184
40	73	0.7426
40	105	0.6742
40	109	0.9202
40	110	0.7786
40	116	0.4594
40	117	0.3608
40	127	0.3574
40	129	0.3248
40	130	0.6268
40	133	0.5789
40	155	0.676
40	157	0.427
40	197	0.4311
40	201	0.7125
40	214	1.6292
40	219	0.6783
41	42	0.9412
41	43	1.0955
41	44	0.411
41	47	0.4576
41	58	0.4003
41	61	0.4817
41	62	0.6698
41	63	0.7141
41	64	0.5158
41	65	0.6633
41	66	0.8424
41	67	0.4612
41	68	0.3971
41	69	0.934
41	70	0.838
41	71	0.6901
41	72	0.6944
41	73	1.3069
41	74	0.6409
41	75	0.4063
41	77	0.412
41	79	0.3128
41	88	0.3587
41	91	0.3051
41	93	0.3111
41	96	0.5472
41	105	0.5771
41	109	0.5796
41	110	0.7804
41	111	0.3078
41	114	0.345
41	116	0.4137
41	119	0.5091
41	120	0.3254
41	121	0.52
41	122	0.3548
41	123	0.4675
41	124	0.4269
41	126	0.4037
41	127	0.9058
41	129	0.6587
41	130	1.3248
41	131	0.847
41	133	0.8557
41	134	0.3285
41	137	0.4
41	141	0.4996
41	143	0.3274
41	144	0.6171
41	146	0.4492
41	149	0.3628
41	155	1.0338
41	157	0.4131
41	166	0.3907
41	167	0.4325
41	168	0.4791
41	169	0.4027
41	170	0.6763
41	171	0.7873
41	172	0.488
41	175	0.3273
41	179	0.3609
41	195	0.3833
41	197	0.4004
41	201	0.754
41	205	0.305
41	209	0.494
41	211	0.6014
41	214	0.6632
41	215	0.5281
41	216	0.383
41	218	0.3515
41	219	0.6959
41	225	0.4458
42	43	1.6731
42	62	0.3976
42	66	1.0409
42	69	0.4196
42	70	0.3921
42	73	0.7303
42	105	0.5624
42	109	0.3523
42	110	0.5738
42	116	0.7251
42	129	0.6019
42	130	0.6803
42	133	0.3383
42	155	0.6523
42	197	0.3324
42	201	0.6561
42	214	1.0123
42	219	0.469
43	62	0.4749
43	66	1.2487
43	69	0.49
43	70	0.4481
43	73	0.8439
43	105	0.6329
43	109	0.391
43	110	0.7162
43	116	1.012
43	127	0.3894
43	128	0.5146
43	129	0.8226
43	130	0.8458
43	133	0.4461
43	155	0.7695
43	157	0.3722
43	171	0.4014
43	197	0.378
43	201	0.8118
43	211	0.4018
43	214	1.1997
43	219	0.5538
44	47	0.3155
44	58	0.492
44	61	0.6779
44	64	0.4972
44	65	1.7326
44	67	0.5888
44	68	0.6489
44	70	0.4089
44	71	0.849
44	72	0.6641
44	73	0.6445
44	74	0.7746
44	75	0.3968
44	77	0.389
44	96	0.6627
44	110	0.3604
44	120	0.6151
44	121	1.082
44	122	0.5302
44	123	0.9691
44	124	0.6345
44	125	0.3531
44	126	0.3863
44	130	0.3138
44	131	0.6206
44	138	0.6499
44	141	0.4034
44	143	0.563
44	146	0.4788
44	149	0.337
44	167	0.4611
44	169	0.4373
44	179	0.3225
44	215	0.5307
44	218	0.3131
44	219	0.6371
44	225	0.4753
45	49	0.3663
45	57	0.4514
45	79	0.3402
45	81	0.7421
45	83	1.2153
45	94	0.3567
45	95	0.5423
45	98	0.4518
45	113	0.5105
45	181	0.754
45	182	0.6188
45	183	0.5422
45	184	0.3951
45	185	1.031
45	186	0.8391
45	187	0.5026
45	188	0.376
45	190	1.0089
45	191	0.4274
45	192	0.8548
45	194	0.4279
45	202	0.6662
45	203	0.5605
45	204	0.8138
45	206	1.0061
45	207	0.6744
45	212	0.651
45	226	0.9225
46	51	0.3708
46	59	1.4634
46	60	0.3993
46	63	0.4299
46	87	0.3735
46	94	0.5337
46	95	0.3292
46	97	0.5742
46	98	0.3866
46	99	0.4745
46	106	0.487
46	108	0.5019
46	111	0.3888
46	132	0.3476
46	133	0.4512
46	134	0.6364
46	135	1.0797
46	137	0.679
46	140	0.312
46	144	0.4561
46	147	0.3983
46	148	0.4228
46	150	0.3586
46	151	0.3555
46	154	0.3109
46	159	0.5954
46	160	0.3773
46	163	0.5126
46	164	0.7964
46	165	0.8153
46	166	0.5105
46	175	0.5457
46	180	0.736
46	182	0.3177
46	194	0.3805
46	195	0.3529
46	196	0.4448
46	199	1.4223
46	210	0.4506
46	213	0.8989
46	217	0.7163
46	220	0.343
46	222	0.3204
47	58	1.1653
47	61	0.8614
47	63	0.4915
47	64	0.8314
47	66	0.365
47	67	0.4354
47	70	0.3618
47	72	0.3179
47	73	0.3303
47	75	0.4185
47	96	0.6792
47	110	0.7587
47	119	1.0861
47	120	1.1461
47	121	0.8389
47	122	1.2304
47	123	0.5968
47	124	1.4634
47	125	0.5312
47	126	1.1958
47	127	0.4101
47	131	0.3441
47	137	0.3299
47	138	0.9138
47	141	1.0164
47	142	0.3899
47	143	0.616
47	144	0.6555
47	146	1.5358
47	149	0.5212
47	157	0.6296
47	166	0.4444
47	167	1.3554
47	168	1.1283
47	169	1.3129
47	170	0.3996
47	171	0.3214
47	172	0.642
47	179	1.0475
47	209	1.0568
47	215	0.3956
47	216	0.3258
48	49	0.6774
48	78	0.4806
48	80	0.3034
48	81	0.9355
48	90	0.6937
48	100	0.5612
48	101	0.3969
48	102	0.4447
48	104	0.3643
48	107	0.3493
48	112	0.4663
48	176	0.5489
48	178	0.5442
48	193	0.4278
48	202	0.5084
48	204	0.6722
48	207	1.0288
48	221	0.5275
48	226	0.6591
49	54	0.7821
49	78	0.6161
49	79	0.3336
49	80	0.3071
49	81	1.4249
49	83	0.5693
49	90	0.6891
49	97	0.4341
49	98	0.618
49	100	0.5329
49	102	0.7563
49	104	0.3687
49	107	0.6375
49	112	0.4987
49	132	0.3459
49	176	0.7687
49	178	0.5313
49	190	0.3137
49	192	0.3065
[truncated: 3,157 more rows]
