# Supplementary material for: Macrophages and pulmonary fibrosis: a bibliometric and visual analysis of publications from 1990 to 2023
Source: Front Med (Lausanne). 2024 Jun 17;11:1374177. doi: 10.3389/fmed.2024.1374177 (PMC11215139; doi:10.3389/fmed.2024.1374177)
Supplement: Supplementary file 7 [file Table_7.XLS]

## Sheet: 文章共被引共现
Co-cited literature	frequency	Degree	Centrality	Sigma	PageRank	Author	Year	Source	Vol	Page	Half-life	DOI
Misharin AV (2017)	126	9	0.77	6.57633e+10	0	Misharin AV	2017	J EXP MED	V214	P2387	2.5	10.1084/jem.20162152
Wynn TA (2016)	102	5	0.8	3.23755e+10	0	Wynn TA	2016	IMMUNITY	V44	P450	3.5	10.1016/j.immuni.2016.02.015
Zhang L (2018)	77	4	0.09	10.46	0	Zhang L	2018	RESP RES	V19	P0	3.5	10.1186/s12931-018-0864-2
Richeldi L (2017)	70	2	0.11	12.38	0	Richeldi L	2017	LANCET	V389	P1941	3.5	10.1016/S0140-6736(17)30866-8
Reyfman PA (2019)	69	4	0.25	265.61	0	Reyfman PA	2019	AM J RESP CRIT CARE	V199	P1517	1.5	10.1164/rccm.201712-2410OC
Raghu G (2011)	69	3	0.14	165.09	0	Raghu G	2011	AM J RESP CRIT CARE	V183	P788	2.5	10.1164/rccm.2009-040GL
Lederer DJ (2018)	63	2	0.03	1.86	0	Lederer DJ	2018	NEW ENGL J MED	V378	P1811	3.5	10.1056/NEJMra1705751
KELLEY J (1990)	62	2	0.06	6.07	0	KELLEY J	1990	AM REV RESPIR DIS	V141	P765	3.5	10.1164/ajrccm/141.3.765
Martinez FJ (2017)	59	2	0.05	3.67	0	Martinez FJ	2017	NAT REV DIS PRIMERS	V3	P0	3.5	10.1038/nrdp.2017.74
ZHANG Y (1993)	58	2	0.17	117.75	0	ZHANG Y	1993	J IMMUNOL	V150	P4188	2.5
Raghu G (2018)	55	2	0.03	1.76	0	Raghu G	2018	AM J RESP CRIT CARE	V198	PE44	2.5	10.1164/rccm.201807-1255ST
Byrne AJ (2016)	53	2	0.03	1.89	0	Byrne AJ	2016	TRENDS MOL MED	V22	P303	3.5	10.1016/j.molmed.2016.02.004
Aran D (2019)	53	1	0	1	0	Aran D	2019	NAT IMMUNOL	V20	P163	1.5	10.1038/s41590-018-0276-y
BROEKELMANN TJ (1991)	51	2	0.19	102.39	0	BROEKELMANN TJ	1991	P NATL ACAD SCI USA	V88	P6642	3.5	10.1073/pnas.88.15.6642
Gibbons MA (2011)	50	5	0.97	1.54474e+08	0	Gibbons MA	2011	AM J RESP CRIT CARE	V184	P569	3.5	10.1164/rccm.201010-1719OC
Morse C (2019)	50	3	0.06	2.74	0	Morse C	2019	EUR RESPIR J	V54	P0	2.5	10.1183/13993003.02441-2018
PIGUET PF (1990)	48	4	0.09	8.69	0	PIGUET PF	1990	NATURE	V344	P245	3.5	10.1038/344245a0
King TE (2014)	44	2	0.06	3.43	0	King TE	2014	NEW ENGL J MED	V370	P2083	2.5	10.1056/NEJMoa1402582
KHALIL N (1991)	43	4	0.62	45078.9	0	KHALIL N	1991	AM J RESP CELL MOL	V5	P155	3.5	10.1165/ajrcmb/5.2.155
Selman M (2001)	42	6	0.97	6.27986e+07	0	Selman M	2001	ANN INTERN MED	V134	P136	2.5	10.7326/0003-4819-134-2-200101160-00015
Wynn TA (2011)	42	2	0.02	1.54	0	Wynn TA	2011	J EXP MED	V208	P1339	2.5	10.1084/jem.20110551
Larson-Casey JL (2016)	41	4	0.25	43.82	0	Larson-Casey JL	2016	IMMUNITY	V44	P582	3.5	10.1016/j.immuni.2016.01.001
ANTONIADES HN (1990)	40	7	0.38	1108.52	0	ANTONIADES HN	1990	J CLIN INVEST	V86	P1055	3.5	10.1172/JCI114808
Joshi N (2020)	39	3	0.09	3.16	0	Joshi N	2020	EUR RESPIR J	V55	P0	0.5	10.1183/13993003.00646-2019
Adams TS (2020)	37	4	0.11	5.69	0	Adams TS	2020	SCI ADV	V6	P0	1.5	10.1126/sciadv.aba1983
Desai O (2018)	36	1	0	1	0	Desai O	2018	FRONT MED-LAUSANNE	V5	P0	3.5	10.3389/fmed.2018.00043
Richeldi L (2014)	35	2	0.03	1.75	0	Richeldi L	2014	NEW ENGL J MED	V370	P2071	2.5	10.1056/NEJMoa1402584
Wynn TA (2012)	34	1	0	1	0	Wynn TA	2012	NAT MED	V18	P1028	2.5	10.1038/nm.2807
Prasse A (2006)	33	5	1.09	5.48398e+06	0	Prasse A	2006	AM J RESP CRIT CARE	V173	P781	2.5	10.1164/rccm.200509-1518OC
MARTINET Y (1987)	33	4	0.17	28.01	0	MARTINET Y	1987	NEW ENGL J MED	V317	P202	3.5	10.1056/NEJM198707233170404
Murray LA (2010)	33	3	0.11	7.21	0	Murray LA	2010	PLOS ONE	V5	P0	2.5	10.1371/journal.pone.0009683
*AM THOR SOC (2000)	32	3	0.9	419153	0	*AM THOR SOC	2000	AM J RESP CRIT CARE	V161	P646	2.5	10.1164/AJRCCM.161.2.ATS3-00
CARRE PC (1991)	30	1	0	1	0	CARRE PC	1991	J CLIN INVEST	V88	P1802	4.5	10.1172/JCI115501
CROUCH E (1990)	29	1	0	1	0	CROUCH E	1990	AM J PHYSIOL	V259	PL159	3.5	10.1152/ajplung.1990.259.4.L159
Wynn TA (2008)	28	3	0.11	6.43	0	Wynn TA	2008	J PATHOL	V214	P199	3.5	10.1002/path.2277
Moore BB (2008)	28	2	0.03	1.64	0	Moore BB	2008	AM J PHYSIOL-LUNG C	V294	PL152	2.5	10.1152/ajplung.00313.2007
Katzenstein ALA (1998)	28	2	0.03	1.68	0	Katzenstein ALA	1998	AM J RESP CRIT CARE	V157	P1301	2.5	10.1164/ajrccm.157.4.9707039
KHALIL N (1989)	28	1	0	1	0	KHALIL N	1989	J EXP MED	V170	P727	3.5	10.1084/jem.170.3.727
Murray PJ (2014)	27	4	0.84	10873.7	0	Murray PJ	2014	IMMUNITY	V41	P14	3.5	10.1016/j.immuni.2014.06.008
PHAN SH (1992)	27	4	0.7	2514.18	0	PHAN SH	1992	EXP LUNG RES	V18	P29	3.5	10.3109/01902149209020649
Gross TJ (2001)	27	2	0.03	1.62	0	Gross TJ	2001	NEW ENGL J MED	V345	P517	2.5	10.1056/NEJMra003200
Mosser DM (2008)	25	4	1.07	75359.2	0	Mosser DM	2008	NAT REV IMMUNOL	V8	P958	3.5	10.1038/nri2448
Pechkovsky DV (2010)	25	2	0.13	5.98	0	Pechkovsky DV	2010	CLIN IMMUNOL	V137	P89	3.5	10.1016/j.clim.2010.06.017
Wilson MS (2010)	25	1	0	1	0	Wilson MS	2010	J EXP MED	V207	P535	2.5	10.1084/jem.20092121
ROM WN (1988)	23	2	0.03	1.5	0	ROM WN	1988	J CLIN INVEST	V82	P1685	3.5	10.1172/JCI113781
Yao YY (2016)	23	1	0	1	0	Yao YY	2016	MOL THER	V24	P915	3.5	10.1038/mt.2016.36
Murray LA (2011)	22	4	0.19	9.74	0	Murray LA	2011	INT J BIOCHEM CELL B	V43	P154	2.5	10.1016/j.biocel.2010.10.013
SHAW RJ (1991)	22	2	0.39	49.37	0	SHAW RJ	1991	AM REV RESPIR DIS	V143	P167	2.5	10.1164/ajrccm/143.1.167
American Thoracic Society/European Respiratory Society International Multidisciplinary Consensus Classification of the Idiopathic Interstitial Pneumonias (2002)	22	1	0	1	0	American Thoracic Society/European Respiratory Society International Multidisciplinary Consensus Classification of the Idiopathic Interstitial Pneumonias	2002	AM J RESP CRIT CARE	V165	P277	2.5	10.1164/AJRCCM.165.2.ATS01
Moeller A (2008)	22	1	0	1	0	Moeller A	2008	INT J BIOCHEM CELL B	V40	P362	3.5	10.1016/j.biocel.2007.08.011
CAR BD (1994)	21	2	0.06	2.07	0	CAR BD	1994	AM J RESP CRIT CARE	V149	P655	3.5	10.1164/ajrccm.149.3.8118632
NAGAOKA I (1990)	21	1	0	1	0	NAGAOKA I	1990	J CLIN INVEST	V85	P2023	4.5	10.1172/JCI114669
Henderson NC (2020)	20	1	0	1	0	Henderson NC	2020	NATURE	V587	P555	2.5	10.1038/s41586-020-2938-9
Zhang K (1997)	19	2	0.82	1710.01	0	Zhang K	1997	J IMMUNOL	V158	P954	1.5
Wilson MS (2009)	19	2	0.06	1.92	0	Wilson MS	2009	MUCOSAL IMMUNOL	V2	P103	2.5	10.1038/mi.2008.85
STANDIFORD TJ (1993)	19	2	0.09	2.65	0	STANDIFORD TJ	1993	J IMMUNOL	V151	P2852	3.5
MIYAZAKI Y (1995)	18	2	0.7	368.23	0	MIYAZAKI Y	1995	J CLIN INVEST	V96	P250	1.5	10.1172/JCI118029
Cheng PY (2021)	18	2	0.03	1	0	Cheng PY	2021	CELLS-BASEL	V10	P0	1.5	10.3390/cells10020436
PIGUET PF (1989)	18	1	0	1	0	PIGUET PF	1989	J EXP MED	V170	P655	3.5	10.1084/jem.170.3.655
McCubbrey AL (2018)	17	2	0.03	1.27	0	McCubbrey AL	2018	AM J RESP CELL MOL	V58	P66	2.5	10.1165/rcmb.2017-0154OC
Schafer MJ (2017)	17	1	0	1	0	Schafer MJ	2017	NAT COMMUN	V8	P0	3.5	10.1038/ncomms14532
King TE (2011)	17	1	0	1	0	King TE	2011	LANCET	V378	P1949	2.5	10.1016/S0140-6736(11)60052-4
Raghu G (2004)	16	5	1.08	2020.97	0	Raghu G	2004	NEW ENGL J MED	V350	P125	0.5	10.1056/NEJMoa030511
Hou JW (2018)	16	2	0	1	0	Hou JW	2018	CELL COMMUN SIGNAL	V16	P0	3.5	10.1186/s12964-018-0300-8
Moore BB (2001)	16	2	0.06	1.76	0	Moore BB	2001	J IMMUNOL	V167	P4368	1.5	10.4049/jimmunol.167.8.4368
Wolters PJ (2014)	16	1	0	1	0	Wolters PJ	2014	ANNU REV PATHOL-MECH	V9	P157	4.5	10.1146/annurev-pathol-012513-104706
VIGNAUD JM (1991)	16	1	0	1	0	VIGNAUD JM	1991	AM J RESP CELL MOL	V5	P531	3.5	10.1165/ajrcmb/5.6.531
Wang Y (2021)	16	1	0	1	0	Wang Y	2021	SCI ADV	V7	P0	0.5	10.1126/sciadv.abb6075
Rangarajan S (2018)	15	2	0.06	1.51	0	Rangarajan S	2018	NAT MED	V24	P1121	2.5	10.1038/s41591-018-0087-6
Schupp JC (2015)	15	2	0.03	1.3	0	Schupp JC	2015	PLOS ONE	V10	P0	3.5	10.1371/journal.pone.0116775
Xu Y (2016)	15	1	0	1	0	Xu Y	2016	JCI INSIGHT	V1	P0	3.5	10.1172/jci.insight.90558
Meziani L (2018)	15	1	0	1	0	Meziani L	2018	EUR RESPIR J	V51	P0	3.5	10.1183/13993003.02120-2017
KOVACS EJ (1991)	15	1	0	1	0	KOVACS EJ	1991	IMMUNOL TODAY	V12	P17	2.5	10.1016/0167-5699(91)90107-5
Mora AL (2006)	15	1	0	1	0	Mora AL	2006	AM J RESP CELL MOL	V35	P466	2.5	10.1165/rcmb.2006-0121OC
Wendisch D (2021)	15	1	0	1	0	Wendisch D	2021	CELL	V184	P6243	1.5	10.1016/j.cell.2021.11.033
Shapouri-Moghaddam A (2018)	15	0	0	1	0	Shapouri-Moghaddam A	2018	J CELL PHYSIOL	V233	P6425	3.5	10.1002/jcp.26429
Du ST (2019)	14	2	0.03	1.22	0	Du ST	2019	THERANOSTICS	V9	P1878	1.5	10.7150/thno.29682
DRISCOLL KE (1990)	14	2	0.14	2.97	0	DRISCOLL KE	1990	AM J RESP CELL MOL	V2	P381	3.5	10.1165/ajrcmb/2.4.381
Flaherty KR (2019)	14	1	0	1	0	Flaherty KR	2019	NEW ENGL J MED	V381	P1718	3.5	10.1056/NEJMoa1908681
Habermann AC (2020)	14	1	0	1	0	Habermann AC	2020	SCI ADV	V6	P0	1.5	10.1126/sciadv.aba1972
ELIAS JA (1990)	14	1	0	1	0	ELIAS JA	1990	CHEST	V97	P1439	4.5	10.1378/chest.97.6.1439
Scott MKD (2019)	14	1	0	1	0	Scott MKD	2019	LANCET RESP MED	V7	P497	1.5	10.1016/S2213-2600(18)30508-3
Misharin AV (2013)	13	2	0.8	131.51	0	Misharin AV	2013	AM J RESP CELL MOL	V49	P503	2.5	10.1165/rcmb.2013-0086MA
LYNCH JP (1992)	13	2	0.03	1.27	0	LYNCH JP	1992	AM REV RESPIR DIS	V145	P1433	3.5	10.1164/ajrccm/145.6.1433
Liu HJ (2016)	13	1	0	1	0	Liu HJ	2016	PART FIBRE TOXICOL	V13	P0	4.5	10.1186/s12989-016-0167-z
Sica A (2012)	13	1	0	1	0	Sica A	2012	J CLIN INVEST	V122	P787	4.5	10.1172/JCI59643
Collard HR (2016)	13	1	0	1	0	Collard HR	2016	AM J RESP CRIT CARE	V194	P265	4.5	10.1164/rccm.201604-0801CI
Murray PJ (2017)	13	1	0	1	0	Murray PJ	2017	ANNU REV PHYSIOL	V79	P541	3.5	10.1146/annurev-physiol-022516-034339
GIRI SN (1993)	12	2	0.61	40.6	0	GIRI SN	1993	THORAX	V48	P959	2.5	10.1136/thx.48.10.959
GOSSET P (1991)	12	2	0.11	2.14	0	GOSSET P	1991	AM J RESP CELL MOL	V5	P431	3.5	10.1165/ajrcmb/5.5.431
Redente EF (2014)	12	1	0	1	0	Redente EF	2014	AM J RESP CELL MOL	V50	P825	4.5	10.1165/rcmb.2013-0386OC
Lee CG (2001)	11	3	0.14	2.62	0	Lee CG	2001	J EXP MED	V194	P809	2.5	10.1084/jem.194.6.809
Gharib SA (2014)	11	3	0.03	1.2	0	Gharib SA	2014	J LEUKOCYTE BIOL	V95	P9	2.5	10.1189/jlb.1112587
Osterholzer JJ (2013)	11	3	0.84	72.19	0	Osterholzer JJ	2013	J IMMUNOL	V190	P3447	2.5	10.4049/jimmunol.1200604
Leung CC (2012)	11	2	0.01	1.07	0	Leung CC	2012	LANCET	V379	P2008	3.5	10.1016/S0140-6736(12)60235-9
Murray PJ (2011)	11	2	0.03	1.22	0	Murray PJ	2011	NAT REV IMMUNOL	V11	P723	3.5	10.1038/nri3073
ZHANG K (1994)	11	2	0.81	78.45	0	ZHANG K	1994	J IMMUNOL	V153	P4733	3.5
BONNER JC (1991)	11	1	0	1	0	BONNER JC	1991	AM J RESP CELL MOL	V5	P539	3.5	10.1165/ajrcmb/5.6.539
Smith RE (1996)	10	3	0.82	55.89	0	Smith RE	1996	AM J RESP CELL MOL	V15	P693	1.5	10.1165/ajrcmb.15.6.8969262
ZHANG K (1994)	10	2	0.03	1.2	0	ZHANG K	1994	AM J PATHOL	V145	P114	1.5
[Anonymous] (2014)	10	2	0.06	1.41	0	[Anonymous]	2014	F1000PRIME REP	V0	P0	3.5
Wynn TA (2010)	10	2	0.03	1.2	0	Wynn TA	2010	SEMIN LIVER DIS	V30	P245	4.5	10.1055/s-0030-1255354
Moeller A (2009)	10	1	0	1	0	Moeller A	2009	AM J RESP CRIT CARE	V179	P588	3.5	10.1164/rccm.200810-1534OC
Byrne AJ (2015)	10	1	0	1	0	Byrne AJ	2015	THORAX	V70	P1189	2.5	10.1136/thoraxjnl-2015-207020
Reilkoff RA (2011)	10	1	0	1	0	Reilkoff RA	2011	NAT REV IMMUNOL	V11	P427	2.5	10.1038/nri2990
Kolahian S (2016)	10	1	0	1	0	Kolahian S	2016	AM J RESP CELL MOL	V55	P309	2.5	10.1165/rcmb.2016-0121TR
DUBOIS CM (1989)	10	1	0	1	0	DUBOIS CM	1989	AM REV RESPIR DIS	V139	P1257	3.5	10.1164/ajrccm/139.5.1257
ROM WN (1987)	10	1	0	1	0	ROM WN	1987	AM REV RESPIR DIS	V136	P1429	3.5	10.1164/ajrccm/136.6.1429
Gordon S (2003)	10	1	0	1	0	Gordon S	2003	NAT REV IMMUNOL	V3	P23	3.5	10.1038/nri978
PIGUET PF (1994)	9	3	0.73	27.35	0	PIGUET PF	1994	EUR RESPIR J	V7	P515	3.5	10.1183/09031936.94.07030515
Phillips RJ (2004)	9	2	0.06	1.4	0	Phillips RJ	2004	J CLIN INVEST	V114	P438	4.5	10.1172/jci200420997
Noble PW (2011)	9	2	0.09	1.59	0	Noble PW	2011	LANCET	V377	P1760	2.5	10.1016/S0140-6736(11)60405-4
CANTIN AM (1987)	9	1	0	1	0	CANTIN AM	1987	J CLIN INVEST	V79	P1665	3.5	10.1172/JCI113005
ANTONIADES HN (1992)	9	1	0	1	0	ANTONIADES HN	1992	P NATL ACAD SCI USA	V89	P5371	3.5	10.1073/pnas.89.12.5371
ASSOIAN RK (1987)	9	1	0	1	0	ASSOIAN RK	1987	P NATL ACAD SCI USA	V84	P6020	4.5	10.1073/pnas.84.17.6020
Keane MP (1999)	9	1	0	1	0	Keane MP	1999	J IMMUNOL	V162	P5511	3.5
Fukuda Y (1998)	9	1	0	1	0	Fukuda Y	1998	LAB INVEST	V78	P687	3.5
Christmann RB (2014)	9	1	0	1	0	Christmann RB	2014	ARTHRITIS RHEUMATOL	V66	P714	3.5	10.1002/art.38288
ROBERTS AB (1986)	9	1	0	1	0	ROBERTS AB	1986	P NATL ACAD SCI USA	V83	P4167	4.5	10.1073/pnas.83.12.4167
Ziegenhagen MW (1998)	8	4	0.87	30.02	0	Ziegenhagen MW	1998	J INVEST MED	V46	P223	2.5
HOYT DG (1988)	8	2	0.03	1	0	HOYT DG	1988	J PHARMACOL EXP THER	V246	P765	2.5
NATHAN CF (1987)	8	2	0.03	1	0	NATHAN CF	1987	J CLIN INVEST	V79	P319	3.5	10.1172/JCI112815
ROSS R (1986)	8	2	0.06	1.35	0	ROSS R	1986	CELL	V46	P155	4.5	10.1016/0092-8674(86)90733-6
Gharaee-Kermani M (2001)	8	2	0.03	1.16	0	Gharaee-Kermani M	2001	CYTOKINE	V15	P138	1.5	10.1006/cyto.2001.0903
Thannickal VJ (2004)	8	1	0	1	0	Thannickal VJ	2004	ANNU REV MED	V55	P395	4.5	10.1146/annurev.med.55.091902.103810
Hagimoto N (1997)	8	1	0	1	0	Hagimoto N	1997	AM J RESP CELL MOL	V16	P91	0.5	10.1165/ajrcmb.16.1.8998084
Munger JS (1999)	8	1	0	1	0	Munger JS	1999	CELL	V96	P319	3.5	10.1016/S0092-8674(00)80545-0
Ortiz LA (1999)	8	1	0	1	0	Ortiz LA	1999	AM J RESP CELL MOL	V20	P825	3.5	10.1165/ajrcmb.20.4.3193
Wynn TA (2004)	7	3	0.11	1.66	0	Wynn TA	2004	NAT REV IMMUNOL	V4	P583	4.5	10.1038/nri1412
Kim KK (2006)	7	2	0.03	1.14	0	Kim KK	2006	P NATL ACAD SCI USA	V103	P13180	2.5	10.1073/pnas.0605669103
Martinez FO (2008)	7	2	0.99	25	0	Martinez FO	2008	FRONT BIOSCI-LANDMRK	V13	P453	2.5	10.2741/2692
Oriente A (2000)	7	2	0.03	1	0	Oriente A	2000	J PHARMACOL EXP THER	V292	P988	3.5
Peters-Golden M (2002)	7	1	0	1	0	Peters-Golden M	2002	AM J RESP CRIT CARE	V165	P229	2.5	10.1164/ajrccm.165.2.2104050
Zuo FR (2002)	7	1	0	1	0	Zuo FR	2002	P NATL ACAD SCI USA	V99	P6292	4.5	10.1073/pnas.092134099
Lasky JA (2000)	7	1	0	1	0	Lasky JA	2000	ENVIRON HEALTH PERSP	V108	P751	3.5	10.2307/3454412
Bjoraker JA (1998)	6	1	0	1	0	Bjoraker JA	1998	AM J RESP CRIT CARE	V157	P199	2.5	10.1164/ajrccm.157.1.9704130
Baran CP (2007)	6	1	0	1	0	Baran CP	2007	AM J RESP CRIT CARE	V176	P78	1.5	10.1164/rccm.200609-1279OC
Keane MP (1997)	6	1	0	1	0	Keane MP	1997	J IMMUNOL	V159	P1437	3.5
Drent M (1996)	6	1	0	1	0	Drent M	1996	AM J RESP CRIT CARE	V153	P736	3.5	10.1164/ajrccm.153.2.8564126
