# Supplementary material for: Macrophages and pulmonary fibrosis: a bibliometric and visual analysis of publications from 1990 to 2023
Source: Front Med (Lausanne). 2024 Jun 17;11:1374177. doi: 10.3389/fmed.2024.1374177 (PMC11215139; doi:10.3389/fmed.2024.1374177)
Supplement: Supplementary file 8 [file Table_8.XLS]

## Sheet: map
Keyword ID	Keyword	frequency	cluster	y	weight<Links>	weight<Total link strength>	score<Avg. norm. citations>	score<Avg. pub. year>	score<Avg. citations>
2543	lung fibrosis	603	1	0.1047	138	998	0.8768	2012.65	34.2769
251	alveolar macrophages	158	1	0.0264	88	313	0.781	2005.78	37.3987
532	bleomycin	147	1	0.1736	72	330	0.7719	2009.2	37.9388
1132	cytokines	129	1	0.2957	79	300	1.101	2006.88	62.155
825	chemokines	69	1	0.1653	51	160	0.9934	2007.43	55.2464
4389	tgf-beta	65	1	0.355	61	161	1.3237	2009.82	75.6615
2548	lung injury	46	1	-0.2473	44	90	1.0108	2009.24	50.1522
4064	silica	45	1	-0.3894	41	102	0.8146	2008.02	32.2222
4495	tnf-alpha	43	1	0.1699	45	93	0.7795	2002.98	46.6744
3265	oxidative stress	41	1	-0.0274	45	91	0.8721	2012.15	42.3171
101	acute lung injury	35	1	0.3853	30	63	0.8297	2014.94	27.2857
4390	tgf-beta 1	34	1	0.2648	28	60	0.5943	2012.76	30.2941
399	asbestos	33	1	-0.3118	36	68	0.8028	2000.73	46.303
1756	growth factors	32	1	-0.1268	44	85	1.0845	2003.53	62.8438
2045	il-8	27	1	0.5645	33	60	1.2286	2003.74	77.1111
3817	reactive oxygen species	27	1	-0.2023	34	64	1.2006	2007.07	67.1111
2940	monocyte chemoattractant protein-1	26	1	0.4293	36	63	0.9862	2002.81	59.4231
360	antioxidants	25	1	-0.1026	29	58	1.047	2004.8	58.68
2041	il-6	23	1	0.0934	31	58	1.1924	2007.91	63.1304
4618	tumor necrosis factor	23	1	-0.4404	29	62	1.2086	2001.57	79.3478
1735	granuloma	22	1	-0.0463	22	49	0.5014	2010.59	24.5455
3732	pulmonary toxicity	21	1	0.0345	17	23	1.005	2010.76	51.4286
2022	il-10	20	1	0.4167	24	41	1.202	2009.5	52.2
3123	nf-kappa b	18	1	-0.1738	21	39	0.7164	2012	35.4444
2014	il-1	17	1	0.0549	25	43	1.5205	2000.88	99.5294
2473	lipopolysaccharide	16	1	0.4996	26	40	1.0753	2011.62	53.125
402	asbestosis	14	1	-0.0343	21	31	0.868	2001.79	70.7143
1660	gene expression	14	1	0.3501	24	33	1.082	2001	61.5714
2016	il-1 beta	14	1	-0.3572	24	30	2.8891	2011.07	134.071
3142	nitric oxide	14	1	-0.5712	22	31	1.2806	2004.86	85.9286
4611	tuberculosis	14	1	0.3154	15	17	0.8587	2009.43	44.8571
2237	interferon-gamma	13	1	0.2409	21	29	0.7045	2001.85	42.3846
295	angiogenesis	12	1	0.9125	18	27	1.4945	2006.83	81
305	animal model	12	1	-0.7509	18	28	1.1754	2010.58	38.8333
3464	platelet-derived growth factor	12	1	0.4925	22	29	0.7446	1997.08	47.5
3484	pneumoconiosis	12	1	0.1004	17	24	0.4292	2001.42	26.4167
1530	fibronectin	11	1	0.2224	19	27	0.6358	1998.64	32.8182
3301	paraquat	11	1	0.2965	18	22	0.7642	2011.45	33
4261	superoxide dismutase	10	1	-0.3537	12	17	0.5043	2001.3	27.3
261	alveolar type ii cells	9	1	0.7278	10	17	2.1453	2008	103.889
1606	free radicals	9	1	-0.3168	19	26	2.1975	2000.11	115.444
1142	cytotoxicity	8	1	0.2279	10	11	0.4469	2010	23.625
1526	fibrogenesis	8	1	0.2241	20	22	1.9742	2007.88	116.625
1540	fibrosis	278	2	-0.2205	108	616	1.2488	2012.53	63.3813
2156	inflammation	237	2	-0.2581	114	520	1.1744	2012.78	55.5232
2281	interstitial lung disease	199	2	-0.187	80	377	0.8088	2012.02	28.397
3034	myofibroblast	57	2	-0.1634	42	128	1.8831	2013.98	113.877
974	collagen	42	2	0.2277	46	107	1.9684	2008.83	153.119
1049	covid-19	34	2	-0.4521	34	63	1.5393	2021.41	17.2353
3985	scleroderma	32	2	-0.7247	39	98	1.3354	2009.72	40.875
1175	dermatomyositis	30	2	-0.3673	14	45	0.8357	2018.93	27.7
2623	m2 macrophage	28	2	-0.0165	31	60	0.9308	2019.14	25.25
2662	macrophage polarization	26	2	-0.5126	27	48	1.1979	2019.96	28.3846
1524	fibrocyte	23	2	-0.6793	24	55	1.386	2013.91	66.3913
106	acute respiratory distress syndrome	22	2	0.0416	30	51	1.181	2013.41	43.5455
3497	pneumonitis	22	2	-0.0882	26	44	1.0941	2009.73	57.9545
1330	emt	21	2	-0.3114	23	52	1.0042	2019	23.3333
2969	mouse model	18	2	-0.918	21	39	0.5296	2009.5	32.4444
3905	rheumatoid arthritis	18	2	-0.592	17	34	0.5597	2011.67	15.6667
2635	macrophage activation	14	2	-0.4791	10	24	1.0239	2014.43	48.9286
2636	macrophage activation syndrome	14	2	-0.1969	10	15	0.5924	2021.36	4.5
2796	mesenchymal stem cells	14	2	-1.016	14	24	0.8732	2020.43	14
1486	ferritin	12	2	-0.5153	12	24	0.8853	2013.92	50.9167
2154	inflammasome	12	2	-0.6989	16	19	1.7364	2015.92	93.5833
3056	nanoparticles	12	2	-0.8465	14	19	1.418	2016.08	58.8333
2024	il-13	11	2	-0.9273	17	24	1.5476	2014.73	108.909
2078	immune response	11	2	-0.9378	15	20	1.222	2016.82	32.6364
435	autoimmunity	9	2	-0.999	15	19	1.0913	2015.11	27.6667
659	cancer	9	2	-0.6186	15	22	2.6412	2011.89	133.111
2151	infection	9	2	-0.848	13	23	1.6428	2018.33	54.5556
2865	migration	9	2	-0.8059	16	19	0.9193	2011.67	34.1111
2314	ipf	277	3	-0.0991	110	499	0.7927	2014.29	28.4729
599	bronchoalveolar lavage	148	3	0.387	66	265	0.535	2003.52	31.4932
3959	sarcoidosis	110	3	0.2889	63	226	0.582	2006.42	30.2364
4320	systemic sclerosis	66	3	-0.2583	48	144	0.9139	2014.91	27.4697
520	biomarker	49	3	-0.4403	41	102	0.7888	2017.76	24.551
2955	monocytes	40	3	-0.5032	46	104	0.8434	2010.92	25.9
603	bronchoalveolar lavage fluid	36	3	-0.1884	37	67	0.3482	2007.19	19.7778
2092	immunohistochemistry	31	3	-0.333	34	51	0.7659	2004.16	42.4194
1969	hypersensitivity pneumonitis	30	3	0.2016	30	74	0.562	2007.37	32.9667
2209	innate immunity	26	3	-0.4084	33	64	1.3093	2014.19	64.0769
2603	lymphocytes	24	3	0.0254	37	74	0.9464	2007.62	45.4167
1713	gm-csf	22	3	-0.4706	32	48	0.4384	2009.82	17.6818
4276	surfactant	21	3	-0.0563	27	48	1.0473	2008.24	49.5238
3439	pirfenidone	16	3	-0.3733	22	42	0.9703	2015.5	36.875
3596	prognosis	15	3	-0.6014	18	33	0.658	2017.07	22.8
4288	surfactant protein d	14	3	0.4772	17	22	0.5437	2009.5	30.5
2226	integrins	13	3	0.7701	19	35	0.6939	2010.08	44.9231
3395	phagocytosis	13	3	-0.6559	21	34	0.6603	2009.85	30.7692
3504	polarization	13	3	-1.0985	18	34	0.8587	2019.62	35
1567	flow cytometry	12	3	-0.1652	19	34	0.5822	2003.5	30.6667
829	chemotaxis	11	3	-0.6707	18	23	0.3534	2001.18	21.1818
2143	induced sputum	10	3	0.569	17	27	0.2655	2007.8	16.7
3323	pathology	10	3	-0.7572	13	14	0.4634	2010.6	22.2
126	adhesion molecules	9	3	0.6898	20	25	0.9278	1997.11	47.8889
1450	extrinsic allergic alveolitis	9	3	0.8785	14	21	0.7857	1998.67	44.1111
3655	proteomics	9	3	-0.5279	11	15	0.6133	2016	21.8889
1167	dendritic cells	8	3	0.6621	12	16	0.6264	2014.38	37
3726	pulmonary sarcoidosis	8	3	-0.6616	8	10	0.3382	2001.25	21
2586	lungs	163	4	0.0675	98	364	1.1114	2009.33	66.3313
3116	neutrophils	56	4	0.5711	57	151	0.8036	2008.7	40.375
2547	lung inflammation	34	4	0.5539	35	66	0.6408	2013.56	24.1176
2285	interstitial pneumonia	33	4	0.3684	34	65	0.5884	2007.55	36.0303
2531	lung disease	33	4	-0.0411	44	66	0.9489	2011.97	40.4242
408	asthma	30	4	0.5889	39	74	1.2445	2011.33	65.2
4139	smoking	21	4	0.256	30	54	0.5475	2006.67	26.2857
3706	pulmonary hypertension	20	4	0.9654	20	37	0.6628	2013.25	29.95
2729	matrix metalloproteinase	19	4	0.7574	27	46	1.2759	2009.21	73.8421
3675	pulmonary alveolar proteinosis	19	4	0.4283	18	25	0.2074	2015.05	10.4737
2523	lung cancer	16	4	0.4086	18	32	0.9132	2013.62	24.375
1328	emphysema	14	4	0.859	23	30	0.7391	2007.57	42.2143
1988	idiopathic interstitial pneumonia	14	4	0.5858	18	22	0.5289	2008.86	31
890	chronic obstructive pulmonary disease	13	4	0.8809	26	45	1.2939	2014.38	59.0769
908	cigarette smoke	13	4	0.7829	26	33	0.5973	2009.85	30
1030	copd	13	4	0.6255	23	38	1.7187	2017.77	44.4615
183	airway inflammation	11	4	0.9964	19	23	0.6558	2012	33.0909
1179	desquamative interstitial pneumonia	11	4	0.7095	15	24	0.7367	2006.82	50
617	bronchopulmonary dysplasia	10	4	0.9388	19	22	0.9432	2011.8	25.7
1342	endothelin	10	4	0.9835	11	15	0.3574	2009.5	21.1
1538	fibrosing alveolitis	10	4	0.7303	15	15	0.5758	2000.5	42
4346	t-lymphocytes	10	4	0.6501	21	28	0.7235	2003.2	40.1
4010	senescence	9	4	1.0771	10	14	0.7473	2020.78	10
185	airway remodeling	8	4	1.1032	14	20	0.7335	2013.38	37.375
1015	computed tomography	8	4	0.4067	10	14	1.2449	2007.25	66.875
2677	macrophages	363	5	-0.1039	125	787	0.9211	2014.84	34.1763
1522	fibroblasts	95	5	0.1692	64	227	0.9809	2013.27	38.8737
4081	silicosis	74	5	-0.361	55	164	0.9077	2015.01	23.8919
376	apoptosis	50	5	-0.233	46	110	0.8855	2011.92	45.66
1438	extracellular matrix	32	5	0.45	34	75	1.669	2008.78	82.7812
439	autophagy	26	5	-0.4644	22	55	0.8849	2019.92	29.8077
1390	epithelial-mesenchymal transition	22	5	0.2473	21	44	0.5614	2019.64	14.0909
237	alveolar epithelial cells	21	5	-0.0909	30	58	0.5898	2013.76	15.9524
1379	epithelial cells	20	5	0.0664	33	53	1.4081	2010.5	53.2
1430	exosomes	14	5	-0.1362	18	36	2.1452	2021.36	37.2143
3155	nlrp3 inflammasome	14	5	0.1872	11	25	1.4797	2019.86	43.9286
1334	endoplasmic reticulum stress	13	5	-0.2598	15	29	1.0672	2019	29.6154
231	alternatively activated macrophages	12	5	-0.2714	13	25	1.3433	2017.08	51.0833
3318	pathogenesis	12	5	-0.5767	23	34	0.9299	2017.17	34.5
167	aging	10	5	0.1372	19	20	1.3272	2010.8	60.2
1947	hyaluronan	10	5	0.4471	15	26	1.2124	2011.5	55.3
2542	lung fibroblasts	10	5	-0.5874	16	24	0.3942	2010.8	19.2
3141	nintedanib	10	5	-0.8735	15	22	1.9336	2021.2	9
3742	pyroptosis	9	5	-0.0765	10	21	0.9992	2022	11.5556
3773	radiation-induced lung injury	9	5	0.0442	12	15	0.372	2020.11	9.6667
3935	ros	9	5	0.0415	20	24	1.0208	2019.67	55.3333
2482	liposomes	8	5	-0.4508	10	18	1.0517	2020.25	16.875
2893	mitochondria	8	5	-0.424	14	17	0.7189	2010.62	33
3852	remodeling	8	5	0.6036	10	13	1.7301	2008.5	92.75

## Sheet: net
Keyword ID	Connection keyword ID	Line strength
2543	2677	96
532	2543	82
1540	2677	63
1540	2156	60
1540	2586	55
2156	2543	50
2156	2677	48
599	2281	36
251	2543	35
1522	2677	33
2314	2677	33
2586	2677	29
2156	2586	26
2281	2314	26
599	2314	24
1132	2543	24
532	1540	23
1522	2543	22
2543	4081	22
2543	4389	22
599	3959	21
1132	2677	21
2314	3959	21
825	1132	20
1522	1540	20
2314	2543	20
520	2314	19
532	2677	19
1175	2281	19
2281	2677	19
2677	2955	19
2677	3116	19
1540	2314	18
532	2156	17
532	2314	17
1132	1540	17
2281	2543	17
2543	3034	17
2543	3265	17
2543	4390	17
251	2314	16
1132	2156	16
1540	3034	16
2156	2314	16
251	599	15
974	2543	15
1132	2586	15
1540	4320	15
1756	2543	15
2677	4081	15
251	3959	14
599	2543	14
1540	4389	14
2156	2281	14
2543	4064	14
825	1540	13
1522	2314	13
2281	3959	13
2281	4320	13
2543	2547	13
2543	4320	13
2677	4320	13
251	1132	12
251	2281	12
520	2281	12
2543	2662	12
2543	3959	12
2677	3034	12
439	4081	11
599	1969	11
825	2677	11
1132	2281	11
1390	2543	11
2314	2586	11
2543	2548	11
2543	2623	11
532	2586	10
532	4389	10
1132	1756	10
1330	2543	10
1522	3034	10
1540	3116	10
1969	2281	10
2156	2548	10
2281	3905	10
2543	3706	10
101	2543	9
251	4081	9
376	2543	9
599	1132	9
974	1540	9
1049	2543	9
1524	1540	9
1524	2677	9
1735	3959	9
2156	3116	9
2281	3985	9
2543	3155	9
2603	2677	9
2677	3504	9
237	2543	8
376	1540	8
376	4081	8
825	2543	8
1430	2677	8
1438	2543	8
1522	2586	8
1540	2955	8
1540	3497	8
1540	4064	8
1540	4081	8
2156	4081	8
2209	2677	8
2285	2314	8
2314	3596	8
2543	2586	8
2543	3123	8
2586	3959	8
2677	3985	8
2677	4389	8
3985	4320	8
101	2677	7
237	2314	7
251	1540	7
251	4064	7
376	2314	7
399	2543	7
603	2314	7
825	2156	7
825	2314	7
825	2586	7
974	2586	7
974	2677	7
1132	2314	7
1540	2281	7
1540	3985	7
1969	2314	7
2092	2543	7
2156	3123	7
2156	4064	7
2156	4618	7
2209	2543	7
2543	3116	7
2543	3817	7
2543	4495	7
2586	3116	7
101	2156	6
106	2543	6
106	2677	6
251	376	6
251	439	6
251	532	6
251	1522	6
251	3116	6
251	4495	6
376	2156	6
402	2543	6
408	1540	6
520	2543	6
532	974	6
532	1132	6
532	3116	6
599	2586	6
599	2677	6
599	3116	6
825	3959	6
1132	1522	6
1132	3959	6
1132	4618	6
1175	2635	6
1334	2677	6
1379	1522	6
1390	2677	6
1438	2156	6
1540	2226	6
1969	2543	6
1969	3959	6
2156	3265	6
2156	4389	6
2281	2635	6
2285	2543	6
2314	3141	6
2314	3985	6
2314	4495	6
2473	2543	6
2523	2543	6
2603	3116	6
2677	4064	6
2677	4390	6
101	106	5
231	2543	5
237	1522	5
251	261	5
251	825	5
251	2014	5
251	2586	5
251	4389	5
295	1540	5
305	2543	5
360	3959	5
376	439	5
439	2314	5
439	2543	5
439	2677	5
520	3959	5
532	2547	5
532	2548	5
532	2729	5
532	2969	5
532	3985	5
599	1567	5
599	2531	5
603	2543	5
603	3959	5
825	2940	5
974	1522	5
974	2314	5
1030	2543	5
1049	1540	5
1049	2314	5
1175	1486	5
1179	4139	5
1328	2543	5
1330	2677	5
1438	1522	5
1438	2677	5
1486	2281	5
1524	2543	5
1540	2548	5
1540	2603	5
1540	2969	5
1540	3959	5
1567	2281	5
1735	2677	5
2045	2543	5
2156	2603	5
2281	2636	5
2281	2955	5
2281	3116	5
2281	3675	5
2285	3959	5
2314	3034	5
2314	3116	5
2314	3318	5
2314	3439	5
2314	3905	5
2314	4389	5
2543	2955	5
2543	3439	5
2543	3464	5
2543	3742	5
2586	2969	5
2586	4139	5
2586	4389	5
2677	3395	5
2677	3742	5
2677	3959	5
2677	4495	5
3034	4389	5
4064	4081	5
237	2677	4
251	1530	4
251	2156	4
251	2547	4
251	2603	4
251	3497	4
251	3817	4
251	4276	4
251	4618	4
261	2543	4
295	2156	4
305	532	4
360	1540	4
360	2543	4
360	2586	4
376	1522	4
376	2548	4
376	2586	4
376	2677	4
399	1132	4
399	3817	4
402	4081	4
408	890	4
408	1030	4
408	2314	4
408	2543	4
408	2677	4
408	4389	4
520	1132	4
520	2677	4
520	3596	4
532	825	4
532	2473	4
532	3034	4
532	4390	4
532	4495	4
599	825	4
599	2045	4
599	2143	4
599	2156	4
599	4139	4
599	4276	4
599	4320	4
603	2281	4
659	2156	4
825	1522	4
825	2281	4
825	3116	4
890	2314	4
974	3034	4
974	4389	4
1030	2314	4
1049	2281	4
1049	2677	4
1132	2940	4
1132	3732	4
1132	4064	4
1167	2677	4
1330	1540	4
1334	4081	4
1342	2543	4
1379	2543	4
1379	2586	4
1390	2314	4
1430	1522	4
1430	2543	4
1438	1540	4
1438	2586	4
1486	2635	4
1522	2156	4
1522	4081	4
1522	4320	4
1522	4389	4
1524	2156	4
1524	3034	4
1540	2022	4
1540	2151	4
1540	2623	4
1540	2662	4
1540	2729	4
1540	2940	4
1540	4495	4
1540	4618	4
1713	2677	4
1735	2543	4
1756	2677	4
1947	2543	4
1947	2677	4
2014	2041	4
2016	2543	4
2022	2314	4
2024	2677	4
2045	2677	4
2045	2940	4
2045	3959	4
2092	2314	4
2151	2156	4
2156	2531	4
2156	3034	4
2209	2586	4
2226	2677	4
2226	4389	4
2281	2586	4
2281	2603	4
2281	4139	4
2285	2586	4
2314	4320	4
2482	2677	4
2543	2729	4
2543	2796	4
2543	3056	4
2543	3497	4
2543	3596	4
2543	3935	4
2543	3985	4
2543	4261	4
2548	3265	4
2586	2729	4
2586	3034	4
2586	4276	4
2677	3155	4
2677	3265	4
2677	4618	4
2955	4320	4
3959	4320	4
4064	4618	4
101	532	3
101	1540	3
101	3155	3
106	1540	3
126	2543	3
185	408	3
231	2314	3
231	2482	3
231	2677	3
237	532	3
237	1390	3
237	1540	3
251	1567	3
251	1713	3
251	1756	3
251	2041	3
251	2045	3
251	2237	3
251	2955	3
251	3034	3
251	3395	3
360	1132	3
360	1606	3
360	3116	3
360	3265	3
360	3817	3
376	532	3
399	1379	3
399	1540	3
399	1606	3
399	2156	3
399	4064	3
399	4618	3
408	599	3
408	2156	3
408	2523	3
435	2156	3
520	599	3
520	3265	3
520	3655	3
532	603	3
532	1438	3
532	2022	3
532	2940	3
532	3706	3
532	4261	3
599	1450	3
599	1988	3
599	2092	3
599	2603	3
599	3985	3
599	4495	3
599	4611	3
603	3116	3
617	2543	3
825	1735	3
825	2955	3
825	4320	3
829	1713	3
890	908	3
890	1540	3
890	2156	3
890	3116	3
908	2543	3
974	1438	3
974	2156	3
974	3116	3
1015	2586	3
1030	2156	3
1030	2523	3
1049	2156	3
1049	3497	3
1132	1438	3
1132	1660	3
1132	1735	3
1132	1969	3
1132	2041	3
1132	2045	3
1132	2237	3
1132	2548	3
1132	3116	3
1132	3817	3
1132	3985	3
1132	4081	3
1132	4495	3
1175	2677	3
1179	2285	3
1330	3034	3
1330	4081	3
1334	2543	3
1379	1540	3
1379	2677	3
1390	2156	3
1430	4064	3
1430	4081	3
1438	2314	3
1438	2548	3
1438	3034	3
1450	3959	3
1522	2041	3
1522	3985	3
1522	4064	3
1524	2314	3
1530	4389	3
1540	1735	3
1540	1756	3
1540	2014	3
1540	2024	3
1540	2092	3
1540	2531	3
1540	2547	3
1540	2796	3
1540	2865	3
1540	3141	3
1540	3817	3
1540	4390	3
1660	2586	3
1713	2281	3
1713	4276	3
1713	4320	3
1735	2156	3
1756	2156	3
1756	2548	3
1756	2586	3
1947	2156	3
1988	2285	3
2014	4495	3
2014	4618	3
2022	2041	3
2022	3959	3
2041	2281	3
2041	2586	3
2041	4495	3
2041	4618	3
2045	2281	3
2078	2314	3
2078	2543	3
2143	2281	3
2143	3959	3
2151	2677	3
2154	2543	3
2156	2209	3
2156	2285	3
2156	3439	3
2156	3504	3
2156	3905	3
2156	4495	3
2209	2603	3
2209	2623	3
2209	4320	3
2281	2940	3
2281	3318	3
2281	3706	3
2281	4276	3
2281	4346	3
2314	2542	3
2314	2623	3
2314	2796	3
2314	2955	3
2314	3726	3
2314	4010	3
2314	4081	3
2314	4139	3
2473	2677	3
2482	2543	3
2531	2586	3
2531	2677	3
2531	4276	3
2542	2677	3
2543	2969	3
2543	3142	3
2543	3395	3
2543	3484	3
2543	3504	3
2543	4139	3
2547	2677	3
2548	3817	3
2586	4064	3
2586	4618	3
2603	3959	3
2623	2662	3
2623	2677	3
2662	4081	3
2677	2796	3
2677	2940	3
2677	3123	3
2677	3439	3
2677	4139	3
2677	4276	3
2940	4389	3
2955	3985	3
2969	3985	3
3265	3817	3
3265	3959	3
3655	3959	3
3985	4389	3
4320	4389	3
4389	4495	3
4390	4495	3
101	1522	2
101	2547	2
101	3265	2
101	3301	2
106	1049	2
106	1132	2
106	1330	2
106	1524	2
106	2156	2
126	1438	2
126	2226	2
126	2281	2
167	2543	2
183	185	2
183	408	2
183	2314	2
183	2543	2
185	1522	2
185	2543	2
185	4389	2
231	1540	2
231	4389	2
237	251	2
237	376	2
251	408	2
251	829	2
251	1142	2
251	1969	2
251	2022	2
251	2209	2
251	2473	2
251	2523	2
251	2531	2
251	2893	2
251	2940	2
251	3265	2
251	3985	2
251	4139	2
295	825	2
295	2677	2
305	1540	2
305	1756	2
305	2156	2
360	399	2
360	599	2
360	2285	2
360	2314	2
360	2548	2
360	2677	2
376	1334	2
376	1379	2
376	2281	2
376	3116	2
376	3318	2
376	3395	2
376	3959	2
399	402	2
399	659	2
399	1530	2
399	2548	2
399	2586	2
399	2955	2
399	4495	2
402	1540	2
408	2547	2
408	3116	2
435	1540	2
435	4320	2
439	1334	2
439	3742	2
520	825	2
520	1175	2
520	1540	2
520	2156	2
520	2209	2
520	3439	2
520	4288	2
520	4320	2
532	908	2
532	1522	2
532	1947	2
532	2041	2
532	2285	2
532	2603	2
532	2623	2
532	2955	2
532	3142	2
532	3265	2
532	4320	2
599	603	2
599	829	2
599	1530	2
599	2285	2
599	2523	2
599	2940	2
599	2955	2
599	3265	2
599	3484	2
599	3596	2
599	3675	2
599	3905	2
599	4288	2
603	825	2
603	2045	2
603	2143	2
603	2156	2
603	2586	2
603	2603	2
603	2677	2
603	4139	2
617	3706	2
659	1540	2
659	2151	2
659	2677	2
825	1524	2
825	2237	2
825	3439	2
825	4346	2
825	4389	2
825	4618	2
829	2543	2
890	2543	2
890	2547	2
890	2677	2
890	2729	2
890	3706	2
908	2314	2
908	2547	2
974	2623	2
974	2729	2
1015	2285	2
1015	2543	2
1030	1540	2
1049	2154	2
1049	2586	2
1132	2542	2
1132	2955	2
1132	2969	2
1132	3395	2
1132	3439	2
1132	3852	2
1167	2156	2
1175	2636	2
1179	2281	2
1179	2586	2
1179	2677	2
1328	2677	2
1328	2729	2
1328	3116	2
1330	1522	2
1330	1524	2
1330	2156	2
1330	2314	2
1330	2623	2
1330	2662	2
1330	4389	2
1330	4390	2
1334	2156	2
1334	2314	2
1342	2314	2
1379	2156	2
1379	2209	2
1390	2623	2
1430	2314	2
1438	1947	2
1438	2547	2
1450	1969	2
1450	2281	2
1450	2314	2
1486	2677	2
1522	2281	2
1522	2955	2
1522	3318	2
1522	3464	2
1522	4390	2
1526	2677	2
1526	3116	2
1530	1540	2
1540	1947	2
1540	1969	2
1540	2041	2
1540	2209	2
1540	2542	2
1540	2543	2
1540	3142	2
1540	3318	2
1540	3395	2
1540	3439	2
1540	3464	2
1540	3504	2
1540	3706	2
1540	3773	2
1540	3852	2
1540	4346	2
1567	2586	2
1567	2677	2
1567	2955	2
1567	3959	2
1567	4320	2
1606	2677	2
1606	3817	2
1606	4081	2
1660	2156	2
1660	3732	2
1660	3959	2
1660	4064	2
1660	4389	2
1713	1756	2
1713	2314	2
1713	2586	2
1735	2092	2
1735	2209	2
1735	2281	2
1735	2586	2
1756	2281	2
1756	2542	2
1756	4064	2
1969	2045	2
1969	2156	2
1969	3484	2
1969	3985	2
2014	2156	2
2014	2237	2
2014	2281	2
2014	2543	2
2014	3034	2
2016	2041	2
2016	2156	2
2016	2677	2
2022	2955	2
2022	4320	2
2022	4389	2
2022	4495	2
2024	2156	2
2024	2314	2
2041	2045	2
2041	2543	2
2041	2677	2
2041	3959	2
2041	4320	2
2045	2156	2
2045	3116	2
2078	2156	2
2092	2677	2
2092	3959	2
2092	4390	2
2143	2314	2
2143	4320	2
2151	2586	2
2156	2226	2
2156	2623	2
2156	2796	2
2156	2940	2
2156	2955	2
2156	3301	2
2156	3395	2
2156	3732	2
2156	3817	2
2156	3852	2
2156	3959	2
2156	3985	2
2156	4276	2
2156	4320	2
2209	2281	2
2209	4276	2
2226	2543	2
2226	2586	2
2226	3959	2
2237	2543	2
2237	3959	2
2281	2285	2
2281	2523	2
2281	2623	2
2281	2729	2
2281	3034	2
2281	3142	2
2281	3265	2
2281	3596	2
2281	4081	2
2281	4495	2
2285	4139	2
2314	2473	2
2314	2482	2
2314	2662	2
2314	2729	2
2314	3497	2
2314	3504	2
2314	3675	2
2314	4064	2
2314	4276	2
2314	4288	2
2473	2547	2
2473	3123	2
2523	2531	2
2523	2677	2
2531	2548	2
2531	2603	2
2531	3116	2
2531	3959	2
2531	4139	2
2542	2543	2
2543	2635	2
2543	2893	2
2543	2940	2
2543	3301	2
2543	3675	2
2543	4010	2
2543	4276	2
2543	4288	2
2543	4618	2
2547	3265	2
2547	4320	2
2548	2677	2
2548	3056	2
2586	2955	2
2586	3056	2
2586	3142	2
2586	3323	2
2586	3439	2
2586	3464	2
2586	3484	2
2586	3497	2
2586	3504	2
2586	3985	2
2586	4081	2
2586	4320	2
2586	4495	2
2603	2955	2
2623	3034	2
2623	4320	2
2662	3439	2
2677	2729	2
2677	3773	2
2677	3817	2
2677	3905	2
2677	3935	2
2677	4010	2
2677	4346	2
2865	4081	2
2893	3817	2
2940	4320	2
2940	4495	2
2955	3318	2
2955	3395	2
2955	3959	2
2955	4081	2
2969	4064	2
3034	3985	2
3034	4320	2
3034	4390	2
3123	4064	2
3123	4081	2
3142	3265	2
3142	3817	2
3142	4081	2
3155	3742	2
3265	3301	2
3265	3732	2
3265	4064	2
3265	4320	2
3318	3985	2
3439	4081	2
3439	4288	2
3484	3817	2
3484	4495	2
3497	4495	2
3504	4320	2
3706	4320	2
3742	4081	2
3773	3817	2
3817	4081	2
3959	3985	2
3959	4081	2
3959	4346	2
3959	4389	2
3959	4495	2
4081	4346	2
101	237	1
101	360	1
101	376	1
101	599	1
101	1049	1
101	1132	1
101	1430	1
101	1756	1
101	1947	1
101	2092	1
101	2281	1
101	2548	1
101	2586	1
101	3116	1
101	3123	1
101	3464	1
101	3817	1
101	4390	1
101	4618	1
106	237	1
106	599	1
106	603	1
106	617	1
106	825	1
106	890	1
106	974	1
106	1030	1
106	1328	1
106	1334	1
106	1713	1
106	2237	1
106	2281	1
106	2314	1
106	2548	1
106	2662	1
106	2865	1
106	2940	1
106	2955	1
106	3123	1
106	3497	1
126	251	1
126	532	1
126	974	1
126	1132	1
126	1450	1
126	1522	1
126	1540	1
126	1567	1
126	1660	1
126	2156	1
126	2547	1
126	2586	1
126	2677	1
126	2955	1
126	3959	1
126	4064	1
167	439	1
167	532	1
167	599	1
167	1328	1
167	1334	1
167	1379	1
167	1522	1
167	1540	1
167	2156	1
167	2314	1
167	2586	1
167	2677	1
167	2940	1
167	3155	1
167	3265	1
167	3655	1
167	3852	1
167	4389	1
183	532	1
183	617	1
183	890	1
183	908	1
183	974	1
183	1030	1
183	1132	1
183	1328	1
183	1379	1
183	2531	1
183	2603	1
183	2623	1
183	2677	1
183	3116	1
183	4389	1
185	532	1
185	974	1
185	1540	1
185	2156	1
185	2314	1
185	2586	1
185	2677	1
185	3116	1
185	4288	1
231	408	1
231	1334	1
231	1522	1
231	1947	1
231	2623	1
231	2955	1
231	3034	1
237	305	1
237	599	1
237	908	1
237	974	1
237	1713	1
237	1756	1
237	1947	1
237	2473	1
237	2542	1
237	2548	1
237	2586	1
237	2796	1
237	2955	1
237	3034	1
237	3265	1
237	3318	1
237	3773	1
237	3935	1
237	4389	1
251	360	1
251	399	1
251	402	1
251	520	1
251	603	1
251	890	1
251	908	1
251	1030	1
251	1049	1
251	1342	1
251	1379	1
251	1390	1
251	1450	1
251	1660	1
251	1735	1
251	2078	1
251	2542	1
251	2548	1
251	2636	1
251	2662	1
251	2677	1
251	2729	1
251	2796	1
251	2865	1
251	3056	1
251	3301	1
251	3464	1
251	3655	1
251	3675	1
251	3732	1
251	3905	1
251	3935	1
251	4346	1
251	4390	1
251	4611	1
261	1132	1
261	1522	1
261	1660	1
261	2314	1
261	2548	1
261	2586	1
261	4064	1
261	4288	1
295	532	1
295	1132	1
295	1756	1
295	2045	1
295	2143	1
295	2543	1
295	2586	1
295	2603	1
295	2940	1
295	3034	1
295	3116	1
295	3959	1
295	4389	1
295	4495	1
305	1132	1
305	1713	1
305	2281	1
305	2548	1
305	2940	1
305	3034	1
305	3116	1
305	3142	1
305	3318	1
305	3817	1
305	3985	1
305	4081	1
360	520	1
360	659	1
360	1142	1
360	1438	1
360	1756	1
360	2092	1
360	2156	1
360	2547	1
360	2865	1
360	3123	1
360	3301	1
360	3484	1
376	402	1
376	520	1
376	599	1
376	659	1
376	908	1
376	974	1
376	1142	1
376	1660	1
376	1756	1
376	2016	1
376	2547	1
376	2603	1
376	2969	1
376	3034	1
376	3142	1
376	3497	1
376	3706	1
376	3742	1
376	3817	1
376	3935	1
376	4276	1
376	4320	1
376	4346	1
376	4389	1
376	4611	1
399	435	1
399	520	1
399	825	1
399	829	1
399	908	1
399	1522	1
399	1526	1
399	1735	1
399	1756	1
399	2677	1
399	2893	1
399	3123	1
399	3142	1
399	3265	1
399	3464	1
399	4261	1
399	4389	1
399	4390	1
402	599	1
402	603	1
402	1015	1
402	1606	1
402	1756	1
402	1969	1
402	2016	1
402	2156	1
402	2281	1
402	2314	1
402	2603	1
402	2677	1
402	3265	1
402	3484	1
402	3959	1
408	825	1
408	908	1
408	1049	1
408	1132	1
408	1438	1
408	1522	1
408	1526	1
408	1530	1
408	1756	1
408	2024	1
408	2226	1
408	2281	1
408	2482	1
408	2531	1
408	2586	1
408	2623	1
408	2729	1
408	2796	1
408	2955	1
408	3959	1
408	4288	1
408	4346	1
408	4495	1
435	1713	1
435	2151	1
435	2209	1
435	2281	1
435	2314	1
435	2543	1
435	2677	1
435	3034	1
435	3905	1
435	3985	1
435	4064	1
439	1969	1
439	2022	1
439	2156	1
439	2281	1
439	2662	1
439	2865	1
439	2893	1
439	2955	1
439	3056	1
439	3265	1
439	3905	1
439	4064	1
439	4611	1
520	617	1
520	1430	1
520	1522	1
520	1606	1
520	1756	1
520	2078	1
520	2092	1
520	2531	1
520	2548	1
520	2586	1
520	3142	1
520	3318	1
520	3484	1
520	3675	1
520	3726	1
520	3985	1
520	4081	1
520	4276	1
520	4618	1
532	599	1
532	829	1
532	890	1
532	1330	1
532	1342	1
532	1538	1
532	1756	1
532	2092	1
532	2237	1
532	2531	1
532	2662	1
532	2865	1
532	2893	1
532	3123	1
532	3141	1
532	3155	1
532	3301	1
532	3395	1
532	3439	1
532	3504	1
532	3817	1
532	3935	1
532	4081	1
532	4139	1
532	4618	1
599	908	1
599	1015	1
599	1030	1
599	1167	1
599	1328	1
599	1660	1
599	1713	1
599	1756	1
599	2014	1
599	2041	1
599	2237	1
599	2729	1
599	2969	1
599	3439	1
599	3464	1
599	3497	1
599	4346	1
603	829	1
603	974	1
603	1132	1
603	1524	1
603	1540	1
603	1756	1
603	1988	1
603	2078	1
603	2092	1
603	2285	1
603	2531	1
603	2865	1
603	3655	1
603	3726	1
603	4261	1
603	4276	1
603	4288	1
603	4346	1
603	4495	1
617	890	1
617	1132	1
617	1179	1
617	1328	1
617	1522	1
617	1538	1
617	2285	1
617	2314	1
617	2547	1
617	2586	1
617	2677	1
617	3034	1
617	3675	1
617	4010	1
659	1438	1
659	1606	1
659	2531	1
659	2548	1
659	2662	1
659	3123	1
659	3817	1
659	4389	1
825	829	1
825	1167	1
825	1175	1
825	1330	1
825	1526	1
825	1756	1
825	1947	1
825	1969	1
825	2045	1
825	2092	1
825	2285	1
825	2542	1
825	2547	1
825	2662	1
825	2893	1
825	3034	1
825	3323	1
825	3395	1
825	3852	1
825	3985	1
825	4064	1
829	1540	1
829	2092	1
829	2156	1
829	2314	1
829	2677	1
829	3116	1
829	3323	1
829	4064	1
829	4495	1
829	4618	1
890	1030	1
890	1049	1
890	1328	1
890	1526	1
890	2041	1
890	2281	1
890	2586	1
890	3497	1
890	4010	1
890	4346	1
908	1030	1
908	1132	1
908	1179	1
908	1328	1
908	1450	1
908	1522	1
908	2156	1
908	2473	1
908	2586	1
908	2677	1
908	2729	1
908	3116	1
908	3935	1
908	3959	1
974	1132	1
974	1328	1
974	1330	1
974	1530	1
974	1756	1
974	1988	1
974	2014	1
974	2016	1
974	2024	1
974	2078	1
974	2092	1
974	2209	1
974	2226	1
974	2281	1
974	2482	1
974	2548	1
974	2969	1
974	3706	1
974	3817	1
974	3985	1
974	4261	1
974	4320	1
974	4390	1
974	4495	1
974	4618	1
1015	1179	1
1015	2281	1
1015	2531	1
1015	3959	1
1015	4139	1
1030	1049	1
1030	1328	1
1030	1379	1
1030	1430	1
1030	2531	1
1030	2547	1
1030	2586	1
1030	3497	1
1030	4139	1
1030	4276	1
1030	4611	1
1049	1175	1
1049	1379	1
1049	1430	1
1049	1486	1
1049	2041	1
1049	2151	1
1049	2285	1
1049	2547	1
1049	2603	1
1049	2635	1
1049	2636	1
1049	2662	1
1049	2796	1
1049	3034	1
1049	3116	1
1049	3323	1
1049	3905	1
1049	4139	1
1049	4346	1
1132	1167	1
1132	1175	1
1132	1328	1
1132	1379	1
1132	1450	1
1132	1524	1
1132	1526	1
1132	2016	1
1132	2143	1
1132	2154	1
1132	2209	1
1132	2473	1
1132	2523	1
1132	2531	1
1132	2729	1
1132	3034	1
1132	3123	1
1132	3142	1
1132	3464	1
1132	3484	1
1132	3504	1
1132	3596	1
1132	3935	1
1132	4139	1
1132	4320	1
1132	4389	1
1132	4611	1
1142	2543	1
1142	2677	1
1142	3116	1
1142	3265	1
1142	3301	1
1142	3732	1
1142	3817	1
1167	2209	1
1167	2226	1
1167	2543	1
1167	2586	1
1167	2603	1
1167	2955	1
1167	3959	1
1175	2151	1
1175	2285	1
1175	2955	1
1175	3596	1
1175	3675	1
1179	1328	1
1179	1538	1
1179	1988	1
1179	2314	1
1179	2531	1
1179	2543	1
1179	3675	1
1328	1438	1
1328	1540	1
1328	2156	1
1328	2547	1
1328	2586	1
1328	3706	1
1328	3852	1
1328	4139	1
1330	2548	1
1330	2586	1
1330	3265	1
1330	3497	1
1330	4064	1
1330	4495	1
1334	1430	1
1334	1522	1
1334	2586	1
1334	3318	1
1334	4611	1
1342	1522	1
1342	1540	1
1342	2156	1
1342	2586	1
1342	3034	1
1342	3706	1
1342	3959	1
1379	1524	1
1379	1530	1
1379	1756	1
1379	2016	1
1379	2041	1
1379	2045	1
1379	2078	1
1379	2226	1
1379	2314	1
1379	2531	1
1379	2603	1
1379	3034	1
1379	3116	1
1379	3318	1
1379	3732	1
1379	4139	1
1379	4389	1
1379	4495	1
1390	1430	1
1390	1524	1
1390	1540	1
1390	2473	1
1390	2547	1
1390	2548	1
1390	2662	1
1390	3265	1
1390	3596	1
1390	3773	1
1390	3935	1
1390	4010	1
1390	4081	1
1390	4390	1
1430	2482	1
1430	2523	1
1430	2542	1
1430	2623	1
1430	3742	1
1430	3773	1
1438	1660	1
1438	1756	1
1438	2022	1
1438	2045	1
1438	2092	1
1438	2226	1
1438	2473	1
1438	2542	1
1438	2729	1
1438	3141	1
1438	3484	1
1438	3706	1
1438	3817	1
1438	4064	1
1438	4389	1
1450	1735	1
1450	2226	1
1450	2543	1
1450	2586	1
1450	4288	1
1486	1606	1
1486	1735	1
1486	2314	1
1486	2531	1
1486	2636	1
1486	2969	1
1486	4081	1
1522	1524	1
1522	1526	1
1522	1660	1
1522	1713	1
1522	1756	1
1522	2014	1
1522	2016	1
1522	2045	1
1522	2209	1
1522	2226	1
1522	2237	1
1522	2547	1
1522	2603	1
1522	2623	1
1522	2635	1
1522	2796	1
1522	2940	1
1522	3123	1
1522	3726	1
1522	3935	1
1522	3959	1
1522	4495	1
1524	1756	1
1524	2078	1
1524	2586	1
1524	2623	1
1524	2865	1
1524	2955	1
1524	3439	1
1524	3985	1
1524	4276	1
1524	4390	1
1526	1540	1
1526	1606	1
1526	1735	1
1526	1756	1
1526	2092	1
1526	2314	1
1526	2586	1
1526	3265	1
1526	3464	1
1526	3817	1
1526	4081	1
1526	4389	1
1530	1969	1
1530	2014	1
1530	2281	1
1530	2586	1
1530	2729	1
1530	3985	1
1530	4064	1
1530	4320	1
1530	4495	1
1530	4611	1
1530	4618	1
1538	2022	1
1538	2045	1
1538	2285	1
1538	2314	1
1538	2543	1
1538	2548	1
1538	2677	1
1538	2955	1
1538	3675	1
1538	3959	1
1538	4320	1
1538	4346	1
1540	1660	1
1540	1713	1
1540	2016	1
1540	2045	1
1540	2078	1
1540	2285	1
1540	2473	1
1540	2523	1
1540	2635	1
1540	2893	1
1540	3155	1
1540	3265	1
1540	3655	1
1540	3935	1
1540	4139	1
1540	4288	1
1567	1713	1
1567	1969	1
1567	2045	1
1567	2092	1
1567	2209	1
1567	2314	1
1567	2603	1
1567	2623	1
1567	2940	1
1567	3504	1
1606	1735	1
1606	2156	1
1606	2543	1
1606	2548	1
1606	3123	1
1606	3265	1
1606	4261	1
1606	4389	1
1606	4495	1
1660	2473	1
1660	2543	1
1660	2677	1
1660	3056	1
1660	3265	1
1660	3301	1
1660	3395	1
1660	3464	1
1660	4390	1
1713	2024	1
1713	2045	1
1713	2156	1
1713	2209	1
1713	2531	1
1713	2543	1
1713	2548	1
1713	2729	1
1713	2940	1
1713	3123	1
1713	3504	1
1713	3675	1
1713	3959	1
1713	3985	1
1713	4288	1
1735	3318	1
1735	3484	1
1735	4064	1
1735	4081	1
1735	4611	1
1756	1969	1
1756	2092	1
1756	2209	1
1756	2473	1
1756	2603	1
1756	2729	1
1756	2969	1
1756	3265	1
1756	3464	1
1756	3817	1
1756	4276	1
1756	4390	1
1947	2022	1
1947	2314	1
1947	2548	1
1947	3497	1
1947	3706	1
1969	2143	1
1969	2285	1
1969	2586	1
1969	2603	1
1969	2677	1
1969	2940	1
1969	3116	1
1969	3675	1
1969	4081	1
1969	4276	1
1969	4618	1
1988	2045	1
1988	2281	1
1988	2314	1
1988	2531	1
1988	2543	1
1988	2586	1
1988	2677	1
1988	3265	1
1988	3675	1
1988	3959	1
1988	4139	1
1988	4389	1
1988	4495	1
2014	2024	1
2014	2045	1
2014	2473	1
2014	2531	1
2014	2623	1
2014	2636	1
2014	2677	1
2014	3959	1
2014	4064	1
2014	4081	1
2014	4389	1
2016	2154	1
2016	2209	1
2016	2281	1
2016	2547	1
2016	2586	1
2016	2955	1
2016	3142	1
2016	3155	1
2016	3464	1
2016	3726	1
2016	4081	1
2016	4390	1
2016	4495	1
2022	2156	1
2022	2237	1
2022	2543	1
2022	2586	1
2022	2623	1
2022	2662	1
2022	2677	1
2022	2940	1
2022	3301	1
2022	4081	1
2024	2543	1
2024	2796	1
2024	2865	1
2024	2955	1
2024	2969	1
2024	3034	1
2024	3504	1
2024	4389	1
2024	4618	1
2041	2156	1
2041	2237	1
2041	2636	1
2041	2940	1
2041	2969	1
2041	3301	1
2041	3439	1
2041	4064	1
2041	4139	1
2041	4389	1
2045	2143	1
2045	2285	1
2045	2314	1
2045	2473	1
2045	2729	1
2045	3123	1
2045	3706	1
2045	4495	1
2045	4611	1
2078	2151	1
2078	2586	1
2078	2677	1
2078	3056	1
2078	3596	1
2092	2156	1
2092	2281	1
2092	2285	1
2092	2523	1
2092	2586	1
2092	2603	1
2092	2940	1
2092	2955	1
2092	2969	1
2092	3034	1
2092	3323	1
2092	3596	1
2092	4081	1
2092	4389	1
2143	2156	1
2143	2531	1
2143	2543	1
2143	3116	1
2143	3985	1
2143	4288	1
2143	4346	1
2151	2281	1
2151	2531	1
2151	2662	1
2151	4276	1
2154	2156	1
2154	2209	1
2154	2281	1
2154	2314	1
2154	2547	1
2154	2548	1
2154	2586	1
2154	2662	1
2154	2677	1
2154	3497	1
2154	3985	1
2154	4081	1
2156	2237	1
2156	2473	1
2156	2523	1
2156	2635	1
2156	2662	1
2156	2729	1
2156	2893	1
2156	2969	1
2156	3056	1
2156	3141	1
2156	3142	1
2156	3323	1
2156	3484	1
2156	3497	1
2156	3596	1
2156	3706	1
2156	3742	1
2156	3935	1
2156	4010	1
2156	4139	1
2156	4261	1
2209	2473	1
2209	2531	1
2209	2547	1
2209	2662	1
2209	2955	1
2209	3116	1
2209	3395	1
2209	3959	1
2209	3985	1
2226	2547	1
2226	2662	1
2226	3116	1
2226	4276	1
2237	2285	1
2237	2314	1
2237	2473	1
2237	2635	1
2237	2940	1
2237	4320	1
2237	4495	1
2237	4611	1
2281	2542	1
2281	3141	1
2281	3323	1
2281	3484	1
2281	3497	1
2281	3504	1
2281	3732	1
2281	4618	1
2285	2531	1
2285	2548	1
2285	2603	1
2285	2677	1
2285	3116	1
2285	3596	1
2285	3675	1
2285	3905	1
2285	4261	1
2285	4320	1
2314	2523	1
2314	2531	1
2314	2547	1
2314	2603	1
2314	2865	1
2314	2893	1
2314	2940	1
2314	2969	1
2314	3056	1
2314	3142	1
2314	3265	1
2314	3323	1
2314	3464	1
2314	3817	1
2314	3935	1
2314	4261	1
2314	4346	1
2314	4611	1
2314	4618	1
2473	2729	1
2473	2940	1
2473	3265	1
2473	3464	1
2473	4389	1
2473	4495	1
2482	2531	1
2482	2548	1
2482	3141	1
2523	2955	1
2523	3318	1
[truncated: 228 more rows]
