# Supplementary material for: Macrophages and pulmonary fibrosis: a bibliometric and visual analysis of publications from 1990 to 2023
Source: Front Med (Lausanne). 2024 Jun 17;11:1374177. doi: 10.3389/fmed.2024.1374177 (PMC11215139; doi:10.3389/fmed.2024.1374177)
Supplement: Supplementary file 9 [file Table_9.XLS]

## Sheet: Keyword trend
Keyword ID	Keyword	frequency	Time period
3	5-lipoxygenase	4	2004-2007
15	acute respiratory distress syndrome	3	2004-2007
39	alveolar macrophages	17	2004-2007
55	apoptosis	7	2004-2007
56	arachidonic acid	3	2004-2007
59	asbestosis	4	2004-2007
61	asthma	5	2004-2007
77	bleomycin	16	2004-2007
89	bronchoalveolar lavage	18	2004-2007
127	chemokines	12	2004-2007
134	chronic obstructive pulmonary disease	3	2004-2007
143	collagen	3	2004-2007
159	cytokines	17	2004-2007
200	extrinsic allergic alveolitis	3	2004-2007
208	fibroblasts	6	2004-2007
210	fibrosis	18	2004-2007
220	gene expression	3	2004-2007
222	gene regulation	3	2004-2007
231	gm-csf	4	2004-2007
234	granuloma	3	2004-2007
266	hypersensitivity pneumonitis	8	2004-2007
271	ifn-gamma	3	2004-2007
275	il-10	5	2004-2007
287	immunohistochemistry	3	2004-2007
294	inflammation	21	2004-2007
300	innate immunity	4	2004-2007
311	interstitial lung disease	12	2004-2007
312	interstitial pneumonia	4	2004-2007
314	ipf	19	2004-2007
333	leukotriene	3	2004-2007
339	lung fibrosis	35	2004-2007
345	lungs	23	2004-2007
346	lymphocytes	3	2004-2007
353	macrophages	16	2004-2007
356	matrix metalloproteinase	7	2004-2007
379	monocyte chemoattractant protein-1	5	2004-2007
381	monocytes/macrophages	3	2004-2007
384	mouse model	5	2004-2007
388	myofibroblast	4	2004-2007
394	neutrophils	4	2004-2007
408	oxidative stress	5	2004-2007
434	pneumoconiosis	4	2004-2007
493	sarcoidosis	20	2004-2007
495	scleroderma	4	2004-2007
502	silica	4	2004-2007
505	silicosis	4	2004-2007
521	surfactant	8	2004-2007
526	survival	3	2004-2007
537	tgf-beta	6	2004-2007
549	tnf-alpha	4	2004-2007
14	acute lung injury	4	2008-2011
39	alveolar macrophages	10	2008-2011
54	antioxidants	4	2008-2011
60	arginase	3	2008-2011
64	asbestos	4	2008-2011
85	bleomycin	13	2008-2011
95	bronchoalveolar lavage	20	2008-2011
96	bronchoalveolar lavage fluid	4	2008-2011
111	ccl18	4	2008-2011
126	chemokines	14	2008-2011
146	collagen	11	2008-2011
172	cytokines	16	2008-2011
180	dermatomyositis	4	2008-2011
206	emphysema	3	2008-2011
224	extracellular matrix	3	2008-2011
228	ferritin	5	2008-2011
232	fibroblasts	6	2008-2011
233	fibrocyte	4	2008-2011
239	fibrosis	22	2008-2011
256	granuloma	4	2008-2011
286	hyaluronan	3	2008-2011
290	hypersensitivity pneumonitis	5	2008-2011
298	il-13	3	2008-2011
314	induced sputum	4	2008-2011
318	inflammation	22	2008-2011
323	innate immunity	3	2008-2011
335	interstitial lung disease	26	2008-2011
339	ipf	23	2008-2011
369	lung fibrosis	61	2008-2011
370	lung function	3	2008-2011
371	lung inflammation	3	2008-2011
372	lung injury	8	2008-2011
376	lungs	19	2008-2011
378	lymphangiogenesis	3	2008-2011
387	macrophage activation	4	2008-2011
391	macrophages	34	2008-2011
425	monocytes	6	2008-2011
429	mouse model	5	2008-2011
434	myofibroblast	6	2008-2011
438	nanoparticles	3	2008-2011
443	neutrophils	9	2008-2011
464	oxidative stress	7	2008-2011
533	reactive oxygen species	3	2008-2011
555	sarcoidosis	12	2008-2011
561	scleroderma	5	2008-2011
570	silica	8	2008-2011
576	smoking	4	2008-2011
613	tgf-beta	10	2008-2011
614	tgf-beta 1	7	2008-2011
629	tnf-alpha	6	2008-2011
46	alveolar macrophages	11	2012-2015
66	apoptosis	8	2012-2015
94	biomarker	3	2012-2015
97	bleomycin	20	2012-2015
108	bronchoalveolar lavage	11	2012-2015
110	bronchoalveolar lavage fluid	7	2012-2015
152	chemokines	9	2012-2015
171	collagen	6	2012-2015
193	cytokines	14	2012-2015
200	dendritic cells	3	2012-2015
231	emt	3	2012-2015
249	epithelial cells	3	2012-2015
263	extracellular matrix	3	2012-2015
272	fibroblasts	12	2012-2015
273	fibrocyte	13	2012-2015
279	fibrosis	50	2012-2015
325	growth factors	5	2012-2015
361	hydroxyproline	3	2012-2015
363	hypersensitivity pneumonitis	4	2012-2015
386	immunohistochemistry	6	2012-2015
398	inflammasome	3	2012-2015
399	inflammation	37	2012-2015
426	interstitial lung disease	22	2012-2015
427	interstitial pneumonia	5	2012-2015
434	ipf	33	2012-2015
467	lung fibrosis	66	2012-2015
468	lung inflammation	6	2012-2015
469	lung injury	7	2012-2015
477	lungs	29	2012-2015
478	lymphocytes	3	2012-2015
488	macrophages	51	2012-2015
500	matrix metalloproteinase	5	2012-2015
540	monocytes	4	2012-2015
556	myofibroblast	12	2012-2015
568	neutrophils	10	2012-2015
572	nitric oxide	3	2012-2015
579	nuclear factor kappa b	3	2012-2015
586	oxidative stress	6	2012-2015
607	pericyte	3	2012-2015
661	pulmonary toxicity	3	2012-2015
676	reactive oxygen species	4	2012-2015
680	regulatory t cells	3	2012-2015
703	sarcoidosis	6	2012-2015
706	scleroderma	5	2012-2015
715	silica	3	2012-2015
718	silicosis	4	2012-2015
748	surfactant	3	2012-2015
762	systemic sclerosis	8	2012-2015
776	tgf-beta	10	2012-2015
777	tgf-beta 1	4	2012-2015
21	acute lung injury	9	2016-2019
62	alveolar macrophages	20	2016-2019
96	apoptosis	8	2016-2019
103	asthma	5	2016-2019
113	autophagy	6	2016-2019
124	biomarker	10	2016-2019
126	bleomycin	19	2016-2019
144	bronchoalveolar lavage	5	2016-2019
189	chemokines	5	2016-2019
215	collagen	5	2016-2019
247	cytokines	12	2016-2019
259	dermatomyositis	6	2016-2019
289	emt	6	2016-2019
291	endoplasmic reticulum stress	6	2016-2019
303	epithelial cells	5	2016-2019
309	epithelial-mesenchymal transition	7	2016-2019
318	extracellular matrix	5	2016-2019
336	fibroblasts	21	2016-2019
338	fibrocyte	6	2016-2019
342	fibrosis	53	2016-2019
385	granuloma	5	2016-2019
456	il-6	5	2016-2019
490	inflammation	51	2016-2019
508	innate immunity	9	2016-2019
524	interstitial lung disease	30	2016-2019
536	ipf	47	2016-2019
586	lung disease	10	2016-2019
588	lung fibrosis	107	2016-2019
592	lung inflammation	9	2016-2019
593	lung injury	5	2016-2019
604	lungs	18	2016-2019
606	lymphocytes	5	2016-2019
609	m2 macrophage	11	2016-2019
617	macrophage polarization	8	2016-2019
619	macrophages	74	2016-2019
704	myofibroblast	9	2016-2019
728	neutrophils	6	2016-2019
763	oxidative stress	7	2016-2019
772	pathogenesis	6	2016-2019
804	pirfenidone	5	2016-2019
854	pulmonary alveolar proteinosis	5	2016-2019
862	pulmonary hypertension	8	2016-2019
904	rheumatoid arthritis	5	2016-2019
921	sarcoidosis	15	2016-2019
925	scleroderma	5	2016-2019
947	silica	6	2016-2019
952	silicosis	9	2016-2019
1012	systemic sclerosis	24	2016-2019
1032	tgf-beta	5	2016-2019
1033	tgf-beta 1	7	2016-2019
35	acute lung injury	13	2020-2023
36	acute respiratory distress syndrome	9	2020-2023
83	alveolar epithelial cells	12	2020-2023
88	alveolar macrophages	25	2020-2023
137	apoptosis	12	2020-2023
148	asthma	9	2020-2023
164	autophagy	18	2020-2023
181	biomarker	30	2020-2023
184	bleomycin	30	2020-2023
196	bronchoalveolar lavage	12	2020-2023
353	copd	8	2020-2023
362	covid-19	34	2020-2023
394	cytokines	16	2020-2023
415	dermatomyositis	18	2020-2023
468	emt	11	2020-2023
486	epithelial-mesenchymal transition	13	2020-2023
505	exosomes	13	2020-2023
507	extracellular matrix	7	2020-2023
543	fibroblasts	32	2020-2023
548	fibrosis	79	2020-2023
791	inflammation	66	2020-2023
820	interstitial lung disease	64	2020-2023
834	ipf	113	2020-2023
887	liposomes	7	2020-2023
913	lung fibrosis	206	2020-2023
916	lung inflammation	9	2020-2023
917	lung injury	9	2020-2023
931	lungs	29	2020-2023
946	m2 macrophage	14	2020-2023
956	macrophage activation syndrome	12	2020-2023
967	macrophage polarization	16	2020-2023
975	macrophages	144	2020-2023
1022	mesenchymal stem cells	10	2020-2023
1090	monocytes	13	2020-2023
1126	myofibroblast	19	2020-2023
1157	neutrophils	9	2020-2023
1167	nintedanib	9	2020-2023
1176	nlrp3 inflammasome	10	2020-2023
1213	oxidative stress	10	2020-2023
1290	pneumonitis	8	2020-2023
1292	polarization	8	2020-2023
1335	prognosis	9	2020-2023
1381	pyroptosis	9	2020-2023
1466	sarcoidosis	11	2020-2023
1485	senescence	7	2020-2023
1508	silica	8	2020-2023
1515	silicosis	42	2020-2023
1605	systemic sclerosis	20	2020-2023
1637	tgf-beta	15	2020-2023
1638	tgf-beta 1	9	2020-2023
