# Supplementary material for: Macrophages and pulmonary fibrosis: a bibliometric and visual analysis of publications from 1990 to 2023
Source: Front Med (Lausanne). 2024 Jun 17;11:1374177. doi: 10.3389/fmed.2024.1374177 (PMC11215139; doi:10.3389/fmed.2024.1374177)
Supplement: Supplementary file 10 [file Table_10.XLS]

## Sheet: Keywords clustering timeline
keyword	frequency	cluster	Degree	Centrality	Sigma	PageRank	Year
lung fibrosis	603	0	34	0.36	1	0	1990
m2 polarization	4	0	1	0	1	0	2016
mouse model	4	0	1	0	1	0	2005
antioxidant enzymes	3	0	3	0.01	1	0	1990
kidney fibrosis	2	0	2	0	1	0	2020
liver fibrosis	2	0	2	0	1	0	2021
lung microbiota	2	0	1	0	1	0	2022
herbal medicine	2	0	1	0	1	0	2020
monocyte chemotaxis	2	0	1	0	1	0	1992
alpha-smooth muscle actin	2	0	1	0	1	0	2004
signal transduction	2	0	1	0	1	0	1996
conditioned medium	2	0	1	0	1	0	2014
fas ligand	2	0	1	0	1	0	2000
alveolar macrophage activation	2	0	1	0	1	0	2020
alveolar cells	2	0	1	0	1	0	2020
pathology section	2	0	1	0	1	0	2016
chitinase 1	2	0	1	0	1	0	2022
lung fibroblasts	2	0	1	0	1	0	2017
monoclonal antibody	2	0	1	0	1	0	1994
mesenchymal stem cell	2	0	1	0	1	0	2022
inflammatory mediator	2	0	1	0	1	0	2008
inflammatory cytokines	2	0	1	0	1	0	2022
mineral dust	2	0	1	0	1	0	1994
active oxygen species	1	0	2	0	1	0	1990
anti-tnf- therapeutics	1	0	2	0	1	0	2013
antisense oligonucleotide	1	0	2	0	1	0	2013
alternative activation	1	0	1	0	1	0	2010
-smooth muscle actin	1	0	1	0	1	0	2014
alpha-smooth muscle actin (-sma)	1	0	1	0	1	0	2013
a(2b) adenosine receptor	1	0	1	0	1	0	2019
autofluorescent pigment	1	0	1	0	1	0	1992
activin receptor-like kinase (alk)	1	0	1	0	1	0	2010
alveolar machrophages	1	0	1	0	1	0	1996
autocrine growth factors	1	0	1	0	1	0	1992
oxidative stress	39	1	7	0.42	1	0	1994
acute lung injury	35	1	6	0.35	1	0	1991
tgf-beta 1	32	1	7	0.4	1	0	1996
macrophage polarization	26	1	2	0.01	1.06	0	2014
growth factors	25	1	4	0.05	1.33	0	1992
reactive oxygen species	23	1	12	0.36	1	0	1992
m2 macrophage	22	1	1	0	1	0	2016
epithelial-mesenchymal transition	20	1	1	0	1	0	2016
wound healing	16	1	5	0.07	1.31	0	1998
nlrp3 inflammasome	12	1	1	0	1	0	2016
macrophage activation	11	1	2	0.02	1	0	2010
radiation-induced lung injury	8	1	2	0.01	1	0	2018
gene expression	7	1	3	0.68	1	0	1996
pulmonary alveolar macrophage	3	1	2	0.01	1	0	1998
ionizing radiation	3	1	1	0	1	0	2020
ventilator-induced lung injury	2	1	3	0.03	1	0	2018
transforming growth factor beta1	2	1	2	0.03	1	0	2016
mast cell	2	1	2	0	1	0	1999
multi-walled carbon nanotubes	2	1	2	0.01	1	0	2016
basic fibroblast growth factor	2	1	2	0	1	0	1998
melanoma differentiation-associated gene 5	2	1	2	0.01	1	0	2010
superoxide anion	2	1	1	0	1	0	1998
circular rna	2	1	1	0	1	0	2020
nuclear factor kappa b	2	1	1	0	1	0	2014
hif-1 alpha	2	1	1	0	1	0	2020
regulatory t cells	2	1	1	0	1	0	2014
acute interstitial pneumonia	1	1	1	0	1	0	2011
activated protein c receptor	1	1	1	0	1	0	2003
ipf	238	2	15	0.51	1	0	1991
interstitial pneumonia	30	2	6	0.06	1.38	0	1994
endoplasmic reticulum stress	11	2	1	0	1	0	2016
alternatively activated macrophages	10	2	3	0.05	1	0	2011
matrix metalloproteinase-9	4	2	1	0	1	0	2000
fibrosing alveolitis	4	2	1	0	1	0	1995
immune infiltration	3	2	1	0	1	0	2022
inflammatory response	3	2	1	0	1	0	2022
adenosine receptors	2	2	2	0.02	1	0	2015
interstitial pneumonitis	2	2	2	0.01	1	0	1996
dendritic cells	2	2	2	0.01	1	0	2014
hydrogen peroxide	2	2	1	0	1	0	1996
chronic respiratory diseases	2	2	1	0	1	0	2022
lung function	2	2	1	0	1	0	2010
targeted therapy	2	2	1	0	1	0	2022
renal fibrosis	2	2	1	0	1	0	2014
activated protein c	2	2	1	0	1	0	2003
allergic alveolitis	2	2	1	0	1	0	2001
interstitial fibrosis	2	2	1	0	1	0	2020
oxygen radical	2	2	1	0	1	0	2000
bronchoalveolar lavage disorders	1	2	1	0	1	0	1991
accessory cell function	1	2	1	0	1	0	1997
acute exacerbation (ae)	1	2	1	0	1	0	2019
acute myeloid leukemia	1	2	1	0	1	0	2009
lung injury	44	3	8	0.09	1	0	1994
extracellular matrix	25	3	5	0.05	1	0	1996
matrix metalloproteinase	14	3	3	0.02	1.1	0	2004
pulmonary toxicity	13	3	6	0.1	1.43	0	2006
immune response	9	3	2	0.01	1	0	2016
single-cell rna sequencing	5	3	3	0.03	1	0	2022
rna sequencing	4	3	3	0.01	1	0	2019
air pollution	3	3	2	0.01	1	0	1994
radiation-induced pulmonary fibrosis	3	3	1	0	1	0	2022
drug discovery	2	3	2	0.02	1	0	2019
coal dust	2	3	2	0.01	1	0	1999
cell culture	2	3	1	0	1	0	1994
reactive oxygen intermediates	2	3	1	0	1	0	1994
diffuse parenchymal lung disease	2	3	1	0	1	0	2022
respiratory distress syndrome	2	3	1	0	1	0	2006
hepatic stellate cells	2	3	1	0	1	0	2018
particle size	2	3	1	0	1	0	2006
bronchopulmonary dysplasia	2	3	1	0	1	0	2023
acute graft-versus-host disease	1	3	1	0	1	0	2009
2-chloroethyl ethyl sulfide (cees)	1	3	1	0	1	0	2009
aeol 10150	1	3	1	0	1	0	2007
lung inflammation	32	4	5	0.03	1.12	0	1996
innate immunity	19	4	7	0.06	1.28	0	2006
pulmonary hypertension	14	4	4	0.65	6.47	0	2000
il-1 beta	10	4	5	0.12	1	0	2000
platelet-derived growth factor	8	4	5	0.74	8.37	0	1993
epithelial cells	6	4	2	0.01	1	0	2014
in situ hybridization	4	4	2	0.68	1	0	1996
adaptive immunity	3	4	1	0	1	0	2014
protein kinase c	2	4	2	0	1	0	2001
fusion protein	2	4	2	0	1	0	2007
vascular remodeling	2	4	1	0	1	0	2018
myeloid cells	2	4	1	0	1	0	2017
neonatal oxygen	2	4	1	0	1	0	2017
insulin-like growth factor-i	2	4	1	0	1	0	1994
pulmonary sarcoidosis	2	4	1	0	1	0	2000
m2 macrophage polarization	2	4	1	0	1	0	2022
autoimmune disease	2	4	1	0	1	0	2020
173t mutation	1	4	1	0	1	0	2009
aberrant lung development	1	4	1	0	1	0	2017
bronchoalveolar lavage	134	5	7	0.67	20614.3	0	1990
systemic sclerosis	62	5	7	0.08	1.71	0	1997
chronic obstructive pulmonary disease	11	5	3	0.64	1	0	2005
rheumatoid arthritis	10	5	2	0.01	1	0	1997
airway inflammation	9	5	3	0.02	1	0	1995
cigarette smoke	7	5	4	0.62	1	0	1991
induced sputum	6	5	2	0.09	1	0	2002
airway remodeling	5	5	1	0	1	0	1995
flow cytometry	5	5	1	0	1	0	1996
adult respiratory distress syndrome	3	5	1	0	1	0	1991
broncho-alveolar lavage	2	5	1	0	1	0	2000
cystic fibrosis	2	5	1	0	1	0	2020
b cells	2	5	1	0	1	0	2020
vitamin d	2	5	1	0	1	0	2022
interstitial lung disease (ild)	2	5	1	0	1	0	2021
t-cell subsets	2	5	1	0	1	0	1992
activated macrophages	2	5	1	0	1	0	2016
antilung serum	1	5	2	0	1	0	1991
14-3-3 epsilon	1	5	1	0	1	0	2019
alveolar macrophages	158	6	14	0.21	16.68	0	1990
lipid metabolism	6	6	2	0.01	1	0	2020
alveolar type ii cells	3	6	1	0	1	0	1998
interstitial macrophages	3	6	1	0	1	0	2022
alveolar lymphocytes	2	6	3	0.02	1	0	1993
alveolar dynamics	2	6	2	0.02	1	0	2020
adenosine deaminase	2	6	2	0	1	0	1993
type ii pneumocytes	2	6	1	0	1	0	2014
stress proteins	2	6	1	0	1	0	1995
polymorphonuclear neutrophils	2	6	1	0	1	0	1999
amino acid metabolism	2	6	1	0	1	0	2022
alveolar proteinosis	2	6	1	0	1	0	2007
th2 cytokines	2	6	1	0	1	0	2010
activation antigens	1	6	2	0	1	0	1993
adrenoceptor agonists	1	6	1	0	1	0	1994
bronchogenic carcinoma	1	6	1	0	1	0	1991
antifibrotic agent	1	6	1	0	1	0	1991
hypersensitivity pneumonitis	27	7	4	0.05	1.28	0	1994
tgf-beta	23	7	6	0.07	1.49	0	1996
surfactant protein d	9	7	3	0.22	1	0	2005
adhesion molecules	9	7	1	0	1	0	1993
extrinsic allergic alveolitis	7	7	4	0.29	1	0	1992
idiopathic interstitial pneumonia	7	7	2	0.01	1	0	2003
free radicals	4	7	1	0	1	0	1996
drug-induced lung disease	2	7	2	0.01	1	0	2007
non-specific interstitial pneumonia	2	7	1	0	1	0	2003
plasminogen activator inhibitor-1	2	7	1	0	1	0	2010
bronchiolitis obliterans	2	7	1	0	1	0	1996
pulmonary surfactant	2	7	1	0	1	0	1994
langerhans cell histiocytosis	2	7	1	0	1	0	2007
aii receptor blockers	1	7	2	0	1	0	2007
ace inhibitors	1	7	2	0	1	0	2007
8-iso prostaglandin f-2 alpha	1	7	2	0.22	1	0	2005
lung disease	29	8	5	0.16	1.87	0	1992
macrophage activation syndrome	14	8	6	0.07	1.4	0	2019
pulmonary alveolar proteinosis	14	8	3	0.1	1	0	2012
lung cancer	10	8	2	0.11	1	0	2009
hemophagocytic lymphohistiocytosis	2	8	2	0.08	1	0	2020
procoagulant activity	2	8	2	0.01	1	0	1992
systemic lupus erythematosus	2	8	2	0.01	1	0	2022
lung development	2	8	1	0	1	0	2020
heme oxygenase-1	2	8	1	0	1	0	2020
pneumocystis-carinii pneumonia	2	8	1	0	1	0	1992
intratracheal instillation	2	8	1	0	1	0	2020
adult-onset stills disease	2	8	1	0	1	0	2022
case report	2	8	1	0	1	0	2022
planar cell polarity	2	8	1	0	1	0	2017
stills disease	2	8	1	0	1	0	2022
a20 haploinsufficiency	1	8	1	0	1	0	2019
tnf-alpha	18	9	7	0.11	1.88	0	1992
nitric oxide	11	9	3	0.05	1.2	0	1998
monocyte chemoattractant protein-1	11	9	1	0	1	0	1996
animal model	8	9	4	0.03	1	0	1994
visna-maedi virus	4	9	2	0	1	0	1994
tissue factor	3	9	2	0	1	0	1994
nitric oxide synthase	2	9	4	0.03	1	0	1998
surfactant proteins	2	9	2	0.01	1	0	2001
radiation pneumonitis	2	9	2	0.02	1	0	2001
free radical	2	9	1	0	1	0	1998
bronchial epithelium	2	9	1	0	1	0	1993
5-cyclic monophosphate	1	9	2	0	1	0	1992
adenosine 3	1	9	2	0	1	0	1992
air sacs	1	9	1	0	1	0	2001
interstitial lung disease	199	10	11	0.13	1	0	1992
tumor necrosis factor	9	10	1	0	1	0	1992
desquamative interstitial pneumonia	6	10	2	0.01	1	0	2002
anti-mda5 antibody	4	10	1	0	1	0	2022
alveolar epithelium	4	10	1	0	1	0	1994
respiratory bronchiolitis	2	10	1	0	1	0	2002
dna methylation	2	10	1	0	1	0	2021
disease activity	2	10	1	0	1	0	2022
connective tissue diseases	2	10	1	0	1	0	1992
bronchoalveolar lavage fluid (balf)	2	10	1	0	1	0	1995
adhesion molecule	1	10	2	0.01	1	0	1995
acid sphingomyelinase	1	10	1	0	1	0	2007
autoimmune lung disease	1	10	1	0	1	0	2013
bronchoalveolar lavage fluid	33	11	5	0.11	1	0	1991
acute respiratory distress syndrome	15	11	5	0.07	1	0	1999
nf-kappa b	12	11	3	0.02	1	0	2002
gm-csf	8	11	1	0	1	0	2000
eosinophilic pneumonia	4	11	1	0	1	0	2000
acute eosinophilic pneumonia	2	11	3	0.13	1	0	2001
interleukin 1	2	11	1	0	1	0	1999
polyhexamethylene guanidine phosphate	2	11	1	0	1	0	2022
transgenic mice	2	11	1	0	1	0	2002
diffuse parenchymal lung diseases	2	11	1	0	1	0	2020
network pharmacology	2	11	1	0	1	0	2022
proinflammatory cytokines	2	11	1	0	1	0	1999
bleomycin-induced lung injury	2	11	1	0	1	0	2021
alveolar epithelial cells	16	12	6	0.07	1.38	0	1991
mesenchymal stem cells	14	12	4	0.03	1.13	0	2017
extracellular vesicles	3	12	2	0.01	1	0	2022
extracellular vesicle	2	12	1	0	1	0	2022
cytokine storm	2	12	1	0	1	0	2020
anti-fibrotic agents	2	12	1	0	1	0	2020
fibroblast growth factors	2	12	1	0	1	0	1996
adaptor protein 3	2	12	1	0	1	0	2007
5-ht7 effect	1	13	2	0	1	0	2019
5-ht7 receptors	1	13	2	0	1	0	2019
5-ht7 distribution	1	13	2	0	1	0	2019
b- and t-lymphocytes	1	14	1	0	1	0	2012
allergic asthma	1	14	1	0	1	0	2012
acquired immunodeficiency syndrome (aids)	1	15	1	0	1	0	1993
adult (ards)	1	15	1	0	1	0	1993
avidin biotin immunoperoxidase	1	16	1	0	1	0	1991
bronchoalveolar fluid	1	16	1	0	1	0	1991
adhesion proteins	1	17	0	0	1	0	1992
alveolar imaging	1	18	0	0	1	0	2011
adrenergic beta-receptor agonist metabolism	1	19	0	0	1	0	1997
antitumor drug	1	20	0	0	1	0	1997
enzyme-linked immunosorbent assay	2	21	0	0	1	0	2002
b lymphocyte	1	22	0	0	1	0	2012
alveolitis systemic sclerosis	1	23	0	0	1	0	1992
3d cell culture	1	24	0	0	1	0	2019
strain susceptibility	2	25	0	0	1	0	1998
alternative macrophage activation	1	26	0	0	1	0	2010
a549 cell line	1	27	0	0	1	0	2009
pulmonary diseases	2	28	0	0	1	0	2016
respirable dust	2	29	0	0	1	0	1994
plasminogen activator inhibitors	2	30	0	0	1	0	1998
gene regulation	3	31	0	0	1	0	2004
adenosine receptor	1	32	0	0	1	0	2006
alternatively activated	1	33	0	0	1	0	2011
amnion epithelial cells	1	34	0	0	1	0	2012
biological markers	1	35	0	0	1	0	1992
organ fibrosis	2	36	0	0	1	0	2018
all-trans ra	1	37	0	0	1	0	1994
4d confocal imaging	1	38	0	0	1	0	2015
adjuvant-induced arthritis	1	39	0	0	1	0	2007
bcg vaccine	1	40	0	0	1	0	1993
a/j mouse	1	41	0	0	1	0	2011
equine multinodular pulmonary fibrosis	2	42	0	0	1	0	2018
accessory activity	1	43	0	0	1	0	2001
heart failure	2	44	0	0	1	0	2016
acquired immunity	1	45	0	0	1	0	2002
adenoviral vector	1	46	0	0	1	0	2004
activator protein-1	1	47	0	0	1	0	2009
albumin leakage	1	48	0	0	1	0	2011
acute lung injury (ali)	2	49	0	0	1	0	2014
adenovirus vector	1	50	0	0	1	0	1995
ab normalities	1	51	0	0	1	0	2002
arachidonic acid	2	52	0	0	1	0	2005
a recombinant immunotoxin	1	53	0	0	1	0	2014
immune cells	2	54	0	0	1	0	2020
airway remodelling	1	55	0	0	1	0	2004
abca3 mutation	1	56	0	0	1	0	2007
