# Supplementary material for: Macrophages and pulmonary fibrosis: a bibliometric and visual analysis of publications from 1990 to 2023
Source: Front Med (Lausanne). 2024 Jun 17;11:1374177. doi: 10.3389/fmed.2024.1374177 (PMC11215139; doi:10.3389/fmed.2024.1374177)
Supplement: Supplementary file 11 [file Table_11.XLS]

## Sheet: map
Gene number	Gene	frequency	cluster	x	y	weight<Links>	weight<Total link strength>
120	TGFB1	523	1	0.4932	0.3145	129	5001
50	FN1	202	1	0.4177	0.2417	129	2598
119	TGFA	162	1	0.5151	0.4317	129	2681
129	VEGFA	117	1	0.5724	0.2305	129	2046
5	AKT1	112	1	0.3891	0.3438	129	1924
89	MMP9	106	1	0.4793	0.3081	129	1641
3	ACTA1	92	1	0.3932	0.2639	128	1384
81	MAPK1	84	1	0.5195	0.3576	129	1542
114	SMAD3	84	1	0.4716	0.338	127	1529
115	SPP1	82	1	0.4734	0.4297	128	1046
110	SFTPA1	77	1	0.5745	0.2659	118	548
112	SFTPD	73	1	0.5401	0.2386	124	668
128	TP53	72	1	0.5402	0.3585	127	976
35	CTNNB1	70	1	0.537	0.3203	127	1277
87	MMP2	69	1	0.4335	0.3018	126	882
62	IGF1	66	1	0.5499	0.2932	121	702
19	CCN2	65	1	0.4714	0.3659	129	1285
111	SFTPC	65	1	0.5097	0.2397	125	746
117	STAT3	64	1	0.5215	0.2949	128	1185
88	MMP7	63	1	0.555	0.3362	128	992
106	PPARG	59	1	0.4431	0.3536	127	934
109	SERPINE1	59	1	0.48	0.2707	129	997
123	TIMP1	58	1	0.498	0.2823	128	1033
113	SMAD2	57	1	0.4609	0.3145	128	1060
94	MTOR	54	1	0.4579	0.4016	128	956
29	COL1A1	51	1	0.4389	0.3289	121	801
44	EDN1	51	1	0.5932	0.3337	119	587
49	FGF2	51	1	0.4417	0.3775	126	846
55	HIF1A	51	1	0.5237	0.401	128	954
130	VIM	50	1	0.5053	0.3891	125	822
82	MAPK14	46	1	0.4976	0.4263	125	787
93	MT-CO2	45	1	0.5742	0.3025	122	679
10	CASP3	44	1	0.4662	0.4428	123	669
27	CDH1	44	1	0.4519	0.2784	123	752
54	HGF	44	1	0.4052	0.3684	120	617
107	PTGS2	43	1	0.4839	0.2336	118	567
39	CXCL12	42	1	0.4105	0.3377	127	990
45	EGFR	42	1	0.5494	0.3912	123	898
8	BCL2	41	1	0.5536	0.4267	122	613
77	INS	41	1	0.537	0.4206	127	706
84	MAPK8	41	1	0.575	0.3519	127	916
48	FASLG	40	1	0.4042	0.4065	121	513
85	MMP1	40	1	0.4198	0.4036	127	710
86	MMP12	40	1	0.3703	0.2861	122	507
121	TGFB2	40	1	0.5235	0.267	124	720
102	PDGFB	37	1	0.5896	0.2973	107	332
30	COL1A2	36	1	0.3966	0.3075	121	616
57	HMOX1	36	1	0.3797	0.3862	113	345
83	MAPK3	36	1	0.5677	0.3852	128	760
47	ELN	35	1	0.4573	0.2534	126	790
1	ACE	34	1	0.3755	0.3387	114	409
4	ACTA2	34	1	0.5581	0.258	110	516
96	MUC5B	34	1	0.5833	0.3731	125	697
80	LGALS3	33	1	0.5922	0.2649	124	608
103	PDGFRB	33	1	0.3909	0.2278	120	588
98	NFE2L2	32	1	0.4375	0.4237	117	429
122	TGFBR1	32	1	0.4235	0.2783	123	695
104	PECAM1	30	1	0.4161	0.3074	118	524
40	CXCL8	249	2	0.7344	0.7472	129	2597
14	CCL2	235	2	0.7198	0.6734	129	3319
61	IFNG	232	2	0.7031	0.6097	129	3410
24	CD4	208	2	0.6547	0.7199	129	2544
63	IL10	206	2	0.688	0.6714	129	3149
26	CD8A	150	2	0.6422	0.6441	129	1464
33	CSF2	146	2	0.6911	0.7189	129	1722
65	IL17A	107	2	0.6559	0.668	129	1982
13	CCL18	96	2	0.7484	0.6198	129	1371
38	CXCL10	94	2	0.7	0.5743	129	1633
16	CCL3	84	2	0.75	0.6299	129	1258
66	IL18	83	2	0.6193	0.639	129	1048
70	IL2	78	2	0.7562	0.6916	128	1205
97	NELFCD	77	2	0.6557	0.6158	127	1244
95	MUC1	74	2	0.6625	0.6026	125	798
18	CCL5	70	2	0.7766	0.6633	128	1147
31	CRP	67	2	0.7349	0.6107	127	863
75	IL5	56	2	0.6349	0.7007	128	1229
60	IFNA1	55	2	0.6391	0.725	124	943
124	TLR2	54	2	0.7771	0.6289	128	1064
58	ICAM1	52	2	0.7005	0.7594	119	637
59	IFIH1	50	2	0.7266	0.5915	110	469
34	CSF3	49	2	0.7818	0.6613	116	509
51	FOXP3	49	2	0.6401	0.5945	127	892
17	CCL4	48	2	0.7516	0.6582	129	831
69	IL1RN	45	2	0.7687	0.7078	118	583
73	IL33	41	2	0.6156	0.6694	126	778
12	CCL17	40	2	0.6818	0.7472	124	677
41	CXCL9	39	2	0.637	0.6866	118	664
46	ELANE	39	2	0.774	0.6309	122	549
43	CXCR4	38	2	0.6531	0.7472	122	706
72	IL2RA	37	2	0.624	0.6127	119	535
15	CCL22	36	2	0.674	0.7472	109	418
37	CXCL1	36	2	0.7328	0.7189	125	710
2	ACE2	33	2	0.6661	0.632	121	533
126	TLR9	32	2	0.7672	0.6087	120	692
42	CXCR3	31	2	0.6734	0.5935	121	547
90	MPO	31	2	0.7573	0.7594	121	474
11	CCL11	30	2	0.6255	0.724	123	682
71	IL23A	30	2	0.6229	0.6795	120	696
127	TNF	500	3	0.325	0.6866	129	5422
76	IL6	410	3	0.3281	0.6208	129	4298
68	IL1B	346	3	0.2875	0.639	129	2573
74	IL4	239	3	0.3911	0.6522	129	3296
67	IL1A	235	3	0.3526	0.7169	129	3362
64	IL13	183	3	0.275	0.7351	129	3109
99	NFKB1	131	3	0.3182	0.7826	129	2187
78	ITGAM	125	3	0.2904	0.6222	129	1318
91	MRC1	108	3	0.281	0.6465	127	1334
125	TLR4	108	3	0.3714	0.5753	129	1903
22	CD163	90	3	0.3122	0.6092	128	1237
100	NLRP3	86	3	0.3586	0.6694	129	1281
21	CD14	78	3	0.3337	0.718	126	1050
20	CCR2	77	3	0.3602	0.6206	129	1209
25	CD68	77	3	0.2398	0.6762	125	737
79	ITGAX	68	3	0.2746	0.5804	117	598
108	PTPRC	66	3	0.3033	0.7489	128	799
52	GAPDH	65	3	0.3422	0.5961	123	794
101	NOS2	62	3	0.2957	0.7087	128	957
32	CSF1	54	3	0.3806	0.635	124	750
7	ARG1	52	3	0.2658	0.6953	125	874
53	GLI2	48	3	0.2516	0.5976	105	358
9	CASP1	46	3	0.3859	0.717	121	567
56	HMGB1	43	3	0.4025	0.6876	128	716
36	CX3CR1	38	3	0.3432	0.7786	105	378
6	APCS	36	3	0.2573	0.7371	121	533
28	CHI3L1	36	3	0.3385	0.5672	116	477
116	STAT1	35	3	0.375	0.7017	125	765
23	CD34	34	3	0.4031	0.7108	119	494
92	MSR1	33	3	0.3807	0.6036	123	559
105	POTEF	33	3	0.2318	0.6684	102	280
118	STAT6	33	3	0.237	0.638	119	601

## Sheet: net
基因编号	连线基因编号	连线强度
120	127	230
76	127	227
67	127	164
76	120	152
61	127	148
68	127	147
63	127	141
67	76	135
64	74	134
50	120	133
74	127	127
68	76	126
40	127	124
24	26	122
61	76	119
40	76	117
119	127	117
64	127	114
61	74	113
14	127	112
63	120	112
74	120	111
61	120	110
67	120	110
63	76	109
64	120	109
68	120	108
14	76	106
14	120	105
50	127	105
63	74	103
74	76	103
61	63	100
99	127	100
119	120	99
24	127	96
61	64	92
40	120	89
63	64	88
14	40	87
64	76	87
24	120	85
14	61	81
76	119	81
61	67	79
14	63	78
14	67	77
14	74	77
67	119	77
5	120	76
127	129	76
5	127	74
50	76	74
63	67	74
24	76	73
65	127	73
14	64	72
67	74	72
76	99	72
120	129	72
24	61	71
67	68	71
114	120	70
33	127	69
125	127	69
40	61	68
40	68	68
99	120	68
68	74	67
64	67	66
65	76	66
3	120	65
33	76	65
40	67	65
63	68	64
67	99	64
24	63	63
24	74	63
50	67	63
65	120	63
61	68	62
89	120	62
40	63	61
40	74	61
64	119	60
67	100	60
38	127	59
14	16	58
76	125	58
89	127	58
14	68	57
24	64	57
81	127	57
3	127	56
14	24	55
26	127	55
38	61	55
74	119	55
76	129	55
14	99	54
24	67	54
50	64	54
63	119	54
64	68	54
81	120	54
61	99	53
61	119	52
63	65	52
120	125	52
33	40	51
50	119	51
66	76	51
61	65	50
61	97	50
100	127	50
113	120	50
114	127	50
14	33	49
14	38	49
14	119	49
14	125	49
33	61	49
40	64	49
50	74	49
63	129	49
64	65	49
65	74	49
14	50	48
65	67	48
70	127	48
97	127	48
3	119	47
14	20	47
14	129	47
19	120	47
24	65	47
33	74	47
50	68	47
67	125	47
5	76	46
5	119	46
16	127	46
63	99	46
13	120	45
14	65	45
26	120	45
50	63	45
61	70	45
68	99	45
75	127	45
78	79	45
99	119	45
13	127	44
24	68	44
26	76	44
33	120	44
35	120	44
38	76	44
61	125	44
66	127	44
76	100	44
78	120	44
91	120	44
91	127	44
99	125	44
5	64	43
33	67	43
35	127	43
40	50	43
40	99	43
63	125	43
70	76	43
74	75	43
74	97	43
117	120	43
5	81	42
14	18	42
20	120	42
24	40	42
26	61	42
33	63	42
33	64	42
50	61	42
74	99	42
100	120	42
127	128	42
3	67	41
5	14	41
24	119	41
33	68	41
38	120	41
40	65	41
63	70	41
65	68	41
74	129	41
76	78	41
76	91	41
114	119	41
117	127	41
120	123	41
3	50	40
5	67	40
19	127	40
52	120	40
64	99	40
66	67	40
67	129	40
68	100	40
74	125	40
76	81	40
97	120	40
110	112	40
113	114	40
120	128	40
16	61	39
22	91	39
29	120	39
38	63	39
40	119	39
55	127	39
61	129	39
64	125	39
70	120	39
74	91	39
76	89	39
78	127	39
106	120	39
119	129	39
3	76	38
5	74	38
5	99	38
14	89	38
18	40	38
18	127	38
22	120	38
38	40	38
50	129	38
60	61	38
101	127	38
13	63	37
16	40	37
18	120	37
22	127	37
40	129	37
61	66	37
61	75	37
64	75	37
70	74	37
75	120	37
76	117	37
113	127	37
120	130	37
5	68	36
20	127	36
24	51	36
50	114	36
63	91	36
64	97	36
64	129	36
65	119	36
67	70	36
81	83	36
87	89	36
88	120	36
109	120	36
115	120	36
124	127	36
5	50	35
5	61	35
13	61	35
13	74	35
16	76	35
22	76	35
24	78	35
24	97	35
24	99	35
31	76	35
31	127	35
60	76	35
75	76	35
88	127	35
120	124	35
5	35	34
5	63	34
21	127	34
27	120	34
38	67	34
38	74	34
49	120	34
50	89	34
60	127	34
62	120	34
66	68	34
67	78	34
76	114	34
87	120	34
119	125	34
5	114	33
13	14	33
26	63	33
51	120	33
61	81	33
64	81	33
65	99	33
81	119	33
94	127	33
106	127	33
120	121	33
13	64	32
13	76	32
16	74	32
18	61	32
19	76	32
21	74	32
22	63	32
22	74	32
24	50	32
32	127	32
38	41	32
40	89	32
50	99	32
50	125	32
52	127	32
55	120	32
63	75	32
63	97	32
64	114	32
74	78	32
82	127	32
109	127	32
5	129	31
7	120	31
7	127	31
9	100	31
14	17	31
14	75	31
14	97	31
16	38	31
18	76	31
19	50	31
19	64	31
24	125	31
35	76	31
35	119	31
45	127	31
50	65	31
55	76	31
67	89	31
67	114	31
68	125	31
89	119	31
94	120	31
99	100	31
115	127	31
124	125	31
7	74	30
7	76	30
10	127	30
13	40	30
14	26	30
14	81	30
21	120	30
22	64	30
22	67	30
24	70	30
38	64	30
39	120	30
40	125	30
45	120	30
49	127	30
50	130	30
61	114	30
62	127	30
63	89	30
64	91	30
76	97	30
76	124	30
84	127	30
95	112	30
123	127	30
16	63	29
18	74	29
20	63	29
20	76	29
26	64	29
26	67	29
26	74	29
29	50	29
33	119	29
33	129	29
40	70	29
47	120	29
51	127	29
61	78	29
64	89	29
65	129	29
93	120	29
120	122	29
127	130	29
7	64	28
14	21	28
14	22	28
14	70	28
14	91	28
16	120	28
17	127	28
18	38	28
18	63	28
21	63	28
22	61	28
24	91	28
35	67	28
37	40	28
50	113	28
61	91	28
63	66	28
63	78	28
63	81	28
63	117	28
66	120	28
67	75	28
68	75	28
68	89	28
68	119	28
73	120	28
74	81	28
74	114	28
76	95	28
76	101	28
78	91	28
84	120	28
87	127	28
91	119	28
95	127	28
99	129	28
113	119	28
3	63	27
3	114	27
5	125	27
8	127	27
9	67	27
13	67	27
14	19	27
14	60	27
14	94	27
14	114	27
16	18	27
20	74	27
24	108	27
24	129	27
27	50	27
32	74	27
39	127	27
50	81	27
50	115	27
54	120	27
61	89	27
64	123	27
67	81	27
68	78	27
68	97	27
76	115	27
81	99	27
82	120	27
89	99	27
93	127	27
100	119	27
111	120	27
117	119	27
3	64	26
4	120	26
9	68	26
14	124	26
17	120	26
18	64	26
19	119	26
20	64	26
22	119	26
24	72	26
25	127	26
29	127	26
30	120	26
31	61	26
40	75	26
47	50	26
52	76	26
54	127	26
55	67	26
56	127	26
64	70	26
65	75	26
65	125	26
67	91	26
67	124	26
74	89	26
76	94	26
76	128	26
77	127	26
81	114	26
81	129	26
83	127	26
100	125	26
101	120	26
119	128	26
122	127	26
3	74	25
5	24	25
5	40	25
5	128	25
13	24	25
14	78	25
16	67	25
18	65	25
19	61	25
19	74	25
21	61	25
21	64	25
21	76	25
24	38	25
24	75	25
25	120	25
31	120	25
33	65	25
33	75	25
35	81	25
38	129	25
39	74	25
40	78	25
41	61	25
47	127	25
53	120	25
60	120	25
61	101	25
61	124	25
63	114	25
64	124	25
65	70	25
68	129	25
69	127	25
74	117	25
74	124	25
76	82	25
76	106	25
76	109	25
83	120	25
85	120	25
85	127	25
89	123	25
89	125	25
94	119	25
121	127	25
125	129	25
5	94	24
7	91	24
13	91	24
14	123	24
16	17	24
18	33	24
19	67	24
19	129	24
20	40	24
20	67	24
21	68	24
22	24	24
24	33	24
26	65	24
27	127	24
29	119	24
33	125	24
35	63	24
35	114	24
39	61	24
39	64	24
40	66	24
50	100	24
51	74	24
60	74	24
61	117	24
63	124	24
64	78	24
67	128	24
68	70	24
68	81	24
74	118	24
76	84	24
76	123	24
99	114	24
116	127	24
2	76	23
3	113	23
3	129	23
5	84	23
7	63	23
9	76	23
10	120	23
13	22	23
14	35	23
14	39	23
14	66	23
14	117	23
14	126	23
16	129	23
18	129	23
20	61	23
21	78	23
24	81	23
31	67	23
32	61	23
32	63	23
35	50	23
38	119	23
38	125	23
39	76	23
41	127	23
43	120	23
44	120	23
45	76	23
45	119	23
49	76	23
49	129	23
50	82	23
60	63	23
60	67	23
61	113	23
63	100	23
64	73	23
66	100	23
67	69	23
67	84	23
67	117	23
69	76	23
73	127	23
81	84	23
89	129	23
96	127	23
107	120	23
108	127	23
114	129	23
125	126	23
3	14	22
5	65	22
8	120	22
9	66	22
14	31	22
17	61	22
18	67	22
18	68	22
19	63	22
21	24	22
21	91	22
26	40	22
26	68	22
29	76	22
32	91	22
32	120	22
33	38	22
33	70	22
33	99	22
35	61	22
37	127	22
38	65	22
50	123	22
52	67	22
53	68	22
55	119	22
56	120	22
58	76	22
63	101	22
64	117	22
64	118	22
67	94	22
71	120	22
74	101	22
76	77	22
76	108	22
78	108	22
84	119	22
91	101	22
111	127	22
112	127	22
116	120	22
117	129	22
3	117	21
4	127	21
5	19	21
5	89	21
11	14	21
12	15	21
12	61	21
12	127	21
13	119	21
14	43	21
14	100	21
16	24	21
16	33	21
16	68	21
17	76	21
20	68	21
21	108	21
24	25	21
24	79	21
26	51	21
26	119	21
30	127	21
32	64	21
32	76	21
33	89	21
34	127	21
35	64	21
35	129	21
38	50	21
38	60	21
38	99	21
40	97	21
40	100	21
42	61	21
48	127	21
49	50	21
50	52	21
50	78	21
51	61	21
51	64	21
58	127	21
61	116	21
63	94	21
64	106	21
65	66	21
65	97	21
65	117	21
67	97	21
67	101	21
67	115	21
68	69	21
70	75	21
74	123	21
75	97	21
76	79	21
79	120	21
80	120	21
80	127	21
88	115	21
99	101	21
106	119	21
112	120	21
115	119	21
5	55	20
5	117	20
6	120	20
7	61	20
9	127	20
11	76	20
12	120	20
14	49	20
14	84	20
14	95	20
14	101	20
14	108	20
14	115	20
16	64	20
19	40	20
19	65	20
19	114	20
20	78	20
20	119	20
22	25	20
22	38	20
25	26	20
30	50	20
33	50	20
35	74	20
35	99	20
37	120	20
41	76	20
49	63	20
50	84	20
50	94	20
50	109	20
50	117	20
50	122	20
50	128	20
61	95	20
61	100	20
61	123	20
63	71	20
64	101	20
64	113	20
64	116	20
65	124	20
66	74	20
67	95	20
67	113	20
67	123	20
71	76	20
71	127	20
73	74	20
73	76	20
76	83	20
77	120	20
81	89	20
81	113	20
94	99	20
99	128	20
104	120	20
107	127	20
108	120	20
113	129	20
119	123	20
119	124	20
126	127	20
1	120	19
2	67	19
3	40	19
3	61	19
3	89	19
5	8	19
5	83	19
5	100	19
5	113	19
7	67	19
7	119	19
13	88	19
14	37	19
14	41	19
14	73	19
14	88	19
14	106	19
14	109	19
14	116	19
16	99	19
17	18	19
17	67	19
18	50	19
19	99	19
20	24	19
20	33	19
20	99	19
20	125	19
21	40	19
21	125	19
22	92	19
24	89	19
24	117	19
24	124	19
25	76	19
27	114	19
31	63	19
31	74	19
32	33	19
33	78	19
34	40	19
37	76	19
38	70	19
38	89	19
39	40	19
39	50	19
39	119	19
40	58	19
40	124	19
43	127	19
44	127	19
45	50	19
45	67	19
48	120	19
49	67	19
49	119	19
51	63	19
51	72	19
51	76	19
52	61	19
56	67	19
59	76	19
59	127	19
61	69	19
61	73	19
62	64	19
63	109	19
64	100	19
65	78	19
65	100	19
67	82	19
67	106	19
74	94	19
74	108	19
74	113	19
74	121	19
76	87	19
76	113	19
78	119	19
79	91	19
89	114	19
91	125	19
92	120	19
96	120	19
97	125	19
99	117	19
102	120	19
109	125	19
114	122	19
114	125	19
118	120	19
2	127	18
3	5	18
3	99	18
3	130	18
4	50	18
10	67	18
11	61	18
11	74	18
11	127	18
12	14	18
12	63	18
12	74	18
13	16	18
13	50	18
13	129	18
14	55	18
14	58	18
14	87	18
14	92	18
14	128	18
17	50	18
19	68	18
20	129	18
21	22	18
22	32	18
22	33	18
22	40	18
22	125	18
23	108	18
24	60	18
25	74	18
26	99	18
26	125	18
26	129	18
27	119	18
28	120	18
32	67	18
33	81	18
35	89	18
40	81	18
40	95	18
45	61	18
45	64	18
45	81	18
49	61	18
50	75	18
50	87	18
50	88	18
50	124	18
51	65	18
53	127	18
55	61	18
55	99	18
56	76	18
61	71	18
61	88	18
61	94	18
63	69	18
63	126	18
64	66	18
64	71	18
64	82	18
64	88	18
64	109	18
65	71	18
65	89	18
67	87	18
67	88	18
67	109	18
68	115	18
68	123	18
70	129	18
71	74	18
74	100	18
74	116	18
76	93	18
76	116	18
76	126	18
76	130	18
79	127	18
81	82	18
81	125	18
85	88	18
85	89	18
88	119	18
91	99	18
93	99	18
95	110	18
95	120	18
98	127	18
103	120	18
104	127	18
109	129	18
110	127	18
113	122	18
114	117	18
118	127	18
120	126	18
3	35	17
3	81	17
4	29	17
5	27	17
5	45	17
5	91	17
7	50	17
7	101	17
8	67	17
13	38	17
13	89	17
13	95	17
14	51	17
14	52	17
14	77	17
16	125	17
17	40	17
17	63	17
17	74	17
18	24	17
19	125	17
24	31	17
24	42	17
24	66	17
24	114	17
25	61	17
26	72	17
31	95	17
33	34	17
33	91	17
33	95	17
35	125	17
35	128	17
39	63	17
39	67	17
40	49	17
40	88	17
45	129	17
47	76	17
49	74	17
50	55	17
50	77	17
50	106	17
50	111	17
55	74	17
56	74	17
56	119	17
58	120	17
59	61	17
60	64	17
60	125	17
61	84	17
61	109	17
61	118	17
62	119	17
63	128	17
64	84	17
64	85	17
64	115	17
65	81	17
66	99	17
67	96	17
67	111	17
68	128	17
70	99	17
70	119	17
74	82	17
74	106	17
75	99	17
75	119	17
76	107	17
76	112	17
81	128	17
82	119	17
84	99	17
86	120	17
87	119	17
88	96	17
91	129	17
92	127	17
93	119	17
97	99	17
99	116	17
99	124	17
101	119	17
109	119	17
111	119	17
117	125	17
119	130	17
124	126	17
4	119	16
5	10	16
6	127	16
8	10	16
8	76	16
8	128	16
11	40	16
11	64	16
12	24	16
13	33	16
13	125	16
14	34	16
14	44	16
14	45	16
14	56	16
14	59	16
14	69	16
14	85	16
16	89	16
16	119	16
17	64	16
17	129	16
19	35	16
19	81	16
20	50	16
20	65	16
21	23	16
21	25	16
21	50	16
21	97	16
22	26	16
24	35	16
24	39	16
24	58	16
26	70	16
26	91	16
26	97	16
26	108	16
27	68	16
29	67	16
30	67	16
30	76	16
31	33	16
31	40	16
31	119	16
35	45	16
35	109	16
35	113	16
37	67	16
37	129	16
38	66	16
38	68	16
38	91	16
38	100	16
40	41	16
40	46	16
40	60	16
40	115	16
41	63	16
41	67	16
42	120	16
42	127	16
43	61	16
43	63	16
46	127	16
47	89	16
49	64	16
50	62	16
50	97	16
51	119	16
52	119	16
53	76	16
55	129	16
56	64	16
58	61	16
58	67	16
59	67	16
61	83	16
61	121	16
61	126	16
61	128	16
62	76	16
63	82	16
63	87	16
63	106	16
63	113	16
63	116	16
63	121	16
63	123	16
64	83	16
64	87	16
64	94	16
64	103	16
64	108	16
64	121	16
64	128	16
67	71	16
67	77	16
67	80	16
68	73	16
68	101	16
68	106	16
72	120	16
74	84	16
74	87	16
74	95	16
74	109	16
74	115	16
74	128	16
75	129	16
76	80	16
78	89	16
79	108	16
81	117	16
82	114	16
83	99	16
83	119	16
86	127	16
87	123	16
88	95	16
91	117	16
93	107	16
94	129	16
96	119	16
99	106	16
100	129	16
119	122	16
123	129	16
1	127	15
3	19	15
3	29	15
3	91	15
3	100	15
3	125	15
5	26	15
5	33	15
5	62	15
5	82	15
5	123	15
7	14	15
9	125	15
10	76	15
11	120	15
12	38	15
13	26	15
13	68	15
14	32	15
14	42	15
14	47	15
14	112	15
14	121	15
15	61	15
15	127	15
16	50	15
16	65	15
18	70	15
18	75	15
19	24	15
19	113	15
20	21	15
20	22	15
20	89	15
21	67	15
22	50	15
22	68	15
22	78	15
24	73	15
24	88	15
24	95	15
24	115	15
24	116	15
24	121	15
25	63	15
25	64	15
25	91	15
26	33	15
26	38	15
26	66	15
26	78	15
27	74	15
27	76	15
27	130	15
31	64	15
31	68	15
32	78	15
33	124	15
34	76	15
34	129	15
37	61	15
37	64	15
39	43	15
39	129	15
40	56	15
40	123	15
41	120	15
42	74	15
43	74	15
45	74	15
45	89	15
46	64	15
46	74	15
47	64	15
49	68	15
50	73	15
50	85	15
50	96	15
50	101	15
50	108	15
51	67	15
52	68	15
53	100	15
54	76	15
55	63	15
55	64	15
55	68	15
55	114	15
55	125	15
56	99	15
60	68	15
60	70	15
60	99	15
61	62	15
61	82	15
62	74	15
64	95	15
64	126	15
65	73	15
67	73	15
67	93	15
67	126	15
68	82	15
74	79	15
74	88	15
76	85	15
76	88	15
76	90	15
76	111	15
76	121	15
78	125	15
82	84	15
84	114	15
88	89	15
89	113	15
90	127	15
94	125	15
95	119	15
101	125	15
105	120	15
109	114	15
110	111	15
110	120	15
113	117	15
114	121	15
115	129	15
116	117	15
124	129	15
125	128	15
128	129	15
3	52	14
6	64	14
6	74	14
7	24	14
9	99	14
9	120	14
11	38	14
11	75	14
12	13	14
12	40	14
12	64	14
12	76	14
13	15	14
13	32	14
13	78	14
14	15	14
14	48	14
14	93	14
14	113	14
16	26	14
16	70	14
17	119	14
18	125	14
19	117	14
19	123	14
20	38	14
20	79	14
21	32	14
21	33	14
21	38	14
21	65	14
22	31	14
22	89	14
22	99	14
23	120	14
24	55	14
24	106	14
24	112	14
26	31	14
27	64	14
29	64	14
29	115	14
32	119	14
33	45	14
33	97	14
35	65	14
35	68	14
35	117	14
37	63	14
38	42	14
38	117	14
39	65	14
39	114	14
40	47	14
40	69	14
40	87	14
40	114	14
40	117	14
40	126	14
43	50	14
43	64	14
43	76	14
44	63	14
44	74	14
44	76	14
45	63	14
45	114	14
46	76	14
46	120	14
47	68	14
47	119	14
48	67	14
50	83	14
50	93	14
52	125	14
54	61	14
54	63	14
54	129	14
55	65	14
55	81	14
56	61	14
56	63	14
56	65	14
57	127	14
59	66	14
60	97	14
60	119	14
61	72	14
61	87	14
62	63	14
63	73	14
63	108	14
63	115	14
64	77	14
64	96	14
64	130	14
66	97	14
66	119	14
67	83	14
67	108	14
67	116	14
68	87	14
68	91	14
68	94	14
68	114	14
70	97	14
72	76	14
74	77	14
74	85	14
75	125	14
76	98	14
76	118	14
78	99	14
78	115	14
78	129	14
80	81	14
83	129	14
87	129	14
88	110	14
89	91	14
89	109	14
90	120	14
91	108	14
91	124	14
97	124	14
98	120	14
103	127	14
106	114	14
114	130	14
1	14	13
2	119	13
2	120	13
3	22	13
3	24	13
3	38	13
4	76	13
5	39	13
5	70	13
5	106	13
5	130	13
6	61	13
7	22	13
7	68	13
7	99	13
7	129	13
8	14	13
8	99	13
10	50	13
10	64	13
10	119	13
10	125	13
10	128	13
11	63	13
11	67	13
13	97	13
13	99	13
14	25	13
14	27	13
14	29	13
14	36	13
14	54	13
14	80	13
14	103	13
14	107	13
14	130	13
16	41	13
16	60	13
16	124	13
17	38	13
18	20	13
18	26	13
18	39	13
18	41	13
18	99	13
19	30	13
19	45	13
19	109	13
20	91	13
22	29	13
22	66	13
23	24	13
23	127	13
24	32	13
24	37	13
24	41	13
24	45	13
24	69	13
24	71	13
24	100	13
24	101	13
24	113	13
24	123	13
25	38	13
25	67	13
26	42	13
26	79	13
26	81	13
27	35	13
27	67	13
28	127	13
29	52	13
29	63	13
29	99	13
29	113	13
31	66	13
32	68	13
33	35	13
33	58	13
34	61	13
35	40	13
35	84	13
35	94	13
35	100	13
35	130	13
37	65	13
37	74	13
38	39	13
38	43	13
38	97	13
38	114	13
38	116	13
40	43	13
40	73	13
40	112	13
41	65	13
42	64	13
43	67	13
43	129	13
44	64	13
45	99	13
46	61	13
47	61	13
47	63	13
47	129	13
48	76	13
49	99	13
50	54	13
50	91	13
50	112	13
50	121	13
51	129	13
54	64	13
55	89	13
56	100	13
60	65	13
61	77	13
61	93	13
61	96	13
61	106	13
61	108	13
61	130	13
62	67	13
63	77	13
63	84	13
63	88	13
63	92	13
64	80	13
64	86	13
65	123	13
67	107	13
67	130	13
68	79	13
68	83	13
68	85	13
68	116	13
68	117	13
68	124	13
69	74	13
69	120	13
70	71	13
72	127	13
73	75	13
74	80	13
74	83	13
74	92	13
74	126	13
74	130	13
76	92	13
76	96	13
76	104	13
76	122	13
77	99	13
77	119	13
80	119	13
81	106	13
82	113	13
83	114	13
84	128	13
87	114	13
88	112	13
89	97	13
89	100	13
92	119	13
96	111	13
99	107	13
99	109	13
101	114	13
106	125	13
106	129	13
114	123	13
119	121	13
1	76	12
3	4	12
3	65	12
3	101	12
3	123	12
4	113	12
4	114	12
5	13	12
5	20	12
5	48	12
5	49	12
5	51	12
5	52	12
5	77	12
5	78	12
5	80	12
6	50	12
6	76	12
7	125	12
8	64	12
8	119	12
10	61	12
10	74	12
11	18	12
11	65	12
12	65	12
12	67	12
13	21	12
13	31	12
13	65	12
13	69	12
13	81	12
13	101	12
13	112	12
13	115	12
14	23	12
14	46	12
14	62	12
14	71	12
14	72	12
14	83	12
14	96	12
14	118	12
15	63	12
15	74	12
16	21	12
16	39	12
16	75	12
17	24	12
17	65	12
17	99	12
18	89	12
18	119	12
19	39	12
19	55	12
19	106	12
19	115	12
19	122	12
20	115	12
20	124	12
21	89	12
22	97	12
22	108	12
23	74	12
24	47	12
24	83	12
24	87	12
24	109	12
24	111	12
24	126	12
25	50	12
26	50	12
26	89	12
27	81	12
27	113	12
28	64	12
28	76	12
29	91	12
30	119	12
31	59	12
33	69	12
33	101	12
33	117	12
34	67	12
35	82	12
35	91	12
37	38	12
38	49	12
39	51	12
39	75	12
40	62	12
40	85	12
40	90	12
40	101	12
40	109	12
40	110	12
41	66	12
41	74	12
42	76	12
43	119	12
44	99	12
45	117	12
45	125	12
46	63	12
47	65	12
47	67	12
47	74	12
48	68	12
48	99	12
48	128	12
50	60	12
50	103	12
52	74	12
52	91	12
54	67	12
54	119	12
55	100	12
55	128	12
56	68	12
56	125	12
59	95	12
60	91	12
60	117	12
61	80	12
61	85	12
61	90	12
61	92	12
61	102	12
61	115	12
61	122	12
62	81	12
62	89	12
62	129	12
63	72	12
63	79	12
63	83	12
63	85	12
63	112	12
63	118	12
64	112	12
64	122	12
65	77	12
65	116	12
65	121	12
66	88	12
67	79	12
67	85	12
67	112	12
68	84	12
68	111	12
70	125	12
71	78	12
71	119	12
72	74	12
74	86	12
74	112	12
75	89	12
76	86	12
77	129	12
81	91	12
81	97	12
82	99	12
83	84	12
84	129	12
88	109	12
89	115	12
91	92	12
92	125	12
94	100	12
94	128	12
99	113	12
99	115	12
99	123	12
100	101	12
102	127	12
104	129	12
108	125	12
109	117	12
109	123	12
109	128	12
111	112	12
111	115	12
116	125	12
2	14	11
2	61	11
3	13	11
3	27	11
3	30	11
3	84	11
3	87	11
3	94	11
3	109	11
3	111	11
3	115	11
4	67	11
5	44	11
5	47	11
5	75	11
5	97	11
5	101	11
5	103	11
5	109	11
5	111	11
5	115	11
5	116	11
6	14	11
7	20	11
7	65	11
7	78	11
8	48	11
8	68	11
9	14	11
10	89	11
11	33	11
12	97	11
13	18	11
13	75	11
13	92	11
13	109	11
13	110	11
13	123	11
13	124	11
14	28	11
14	30	11
14	82	11
14	110	11
14	122	11
16	19	11
16	34	11
16	108	11
17	81	11
18	37	11
18	43	11
18	97	11
19	33	11
19	49	11
19	85	11
19	87	11
19	89	11
19	130	11
20	36	11
20	43	11
20	92	11
20	117	11
21	124	11
22	115	11
22	124	11
22	129	11
23	68	11
24	34	11
24	49	11
24	62	11
24	85	11
24	92	11
26	58	11
27	61	11
27	122	11
28	89	11
28	91	11
29	30	11
29	114	11
31	65	11
31	129	11
32	38	11
33	60	11
34	63	11
34	74	11
34	120	11
35	51	11
35	62	11
35	83	11
35	106	11
36	67	11
36	120	11
37	50	11
37	68	11
38	78	11
38	101	11
38	113	11
38	124	11
38	126	11
39	44	11
39	99	11
39	125	11
40	108	11
41	60	11
41	64	11
42	63	11
42	65	11
43	65	11
44	50	11
44	61	11
44	68	11
47	99	11
49	87	11
49	114	11
50	58	11
50	70	11
50	80	11
50	86	11
50	95	11
50	98	11
50	116	11
51	68	11
51	99	11
51	114	11
52	63	11
55	101	11
55	106	11
55	117	11
57	76	11
58	74	11
58	119	11
58	125	11
58	129	11
59	60	11
60	116	11
61	79	11
61	103	11
61	110	11
61	111	11
61	112	11
62	114	11
63	80	11
63	93	11
63	95	11
63	96	11
63	103	11
63	130	11
64	72	11
64	110	11
65	83	11
65	91	11
65	94	11
65	101	11
65	109	11
65	126	11
66	70	11
66	125	11
67	98	11
67	121	11
67	122	11
68	71	11
68	77	11
68	88	11
68	107	11
68	108	11
68	118	11
68	121	11
68	130	11
70	78	11
71	75	11
[truncated: 6,062 more rows]
