# Supplementary material for: Macrophages and pulmonary fibrosis: a bibliometric and visual analysis of publications from 1990 to 2023
Source: Front Med (Lausanne). 2024 Jun 17;11:1374177. doi: 10.3389/fmed.2024.1374177 (PMC11215139; doi:10.3389/fmed.2024.1374177)
Supplement: Supplementary file 12 [file Table_12.XLS]

## Sheet: GO_result
	ONTOLOGY	ID	Description	GeneRatio	BgRatio	pvalue	p.adjust	qvalue	geneID	Count
GO:0019221	BP	GO:0019221	cytokine-mediated signaling pathway	172/754	492/18614	1.09074e-116	6.10814e-113	2.16885e-113	ADAM17/ADAR/ADIPOQ/AIM2/AKT1/ANGPT1/APOA1/ARG1/AXL/CASP1/CASP8/CAV1/CCL1/CCL11/CCL13/CCL17/CCL18/CCL19/CCL2/CCL20/CCL21/CCL22/CCL24/CCL26/CCL3/CCL4/CCL5/CCL7/CCL8/CCR1/CCR2/CCR3/CCR4/CCR5/CCR6/CCR7/CCR8/CD4/CD44/CEBPA/CHUK/CSF1/CSF1R/CSF2/CSF2RB/CSF3/CX3CL1/CX3CR1/CXCL1/CXCL10/CXCL11/CXCL12/CXCL13/CXCL2/CXCL3/CXCL5/CXCL6/CXCL8/CXCL9/CXCR1/CXCR2/CXCR3/CXCR4/CXCR5/EDN1/EGR1/EPO/EREG/F2RL1/FAS/FLT3/…	172
GO:0001819	BP	GO:0001819	positive regulation of cytokine production	168/754	489/18614	2.17498e-112	6.08994e-109	2.16239e-109	ABL1/ADAM17/ADIPOQ/ADORA2B/AGER/AGT/AIF1/AIM2/ANXA1/APP/ATF4/B2M/BTK/C3/C5AR1/CASP1/CASP8/CCL1/CCL19/CCL3/CCR2/CCR7/CD14/CD2/CD274/CD28/CD34/CD4/CD40/CD40LG/CD80/CD86/CEBPB/CHI3L1/CHIA/CHUK/CSF1R/CSF2/CX3CL1/CXCL17/CYBB/DDIT3/EGR1/EIF2AK3/ELANE/EPHB2/EREG/F2R/F2RL1/F3/FCGR3A/FCN1/FOXP3/FURIN/GAPDH/GATA3/GATA6/GSDMD/HGF/HIF1A/HMGB1/HMOX1/HSP90AA1/HSPA1A/HSPB1/IDO1/IFIH1/IFNG/IL10/IL12B/IL13/IL15/I…	168
GO:0050900	BP	GO:0050900	leukocyte migration	148/754	393/18614	3.71868e-105	6.94154e-102	2.46477e-102	ABL1/ADAM10/ADAM17/AGER/AIF1/AKT1/ALOX5/ANXA1/APP/BSG/C5AR1/CALCA/CCL1/CCL11/CCL13/CCL17/CCL18/CCL19/CCL2/CCL20/CCL21/CCL22/CCL24/CCL26/CCL3/CCL4/CCL5/CCL7/CCL8/CCR1/CCR2/CCR5/CCR6/CCR7/CD34/CD47/CD9/CDC42/CSF1/CSF1R/CX3CL1/CX3CR1/CXCL1/CXCL10/CXCL11/CXCL12/CXCL13/CXCL16/CXCL17/CXCL2/CXCL3/CXCL5/CXCL6/CXCL8/CXCL9/CXCR1/CXCR2/CXCR3/CXCR4/CXCR5/DPP4/DUSP1/EDN1/ELANE/F2RL1/FLT1/FOXJ1/FUT4/GATA3/GREM…	148
GO:0022407	BP	GO:0022407	regulation of cell-cell adhesion	147/754	491/18614	4.69774e-88	4.38456e-85	1.55685e-85	ABL1/ACTB/ADIPOQ/ADORA2A/AGER/AIF1/AKT1/ALOX5/ANXA1/APOA1/ARG1/B2M/BMP2/BMP4/BMP7/CASP3/CAV1/CCL19/CCL2/CCL21/CCL5/CCR2/CCR7/CD209/CD27/CD274/CD28/CD4/CD40LG/CD44/CD47/CD5/CD80/CD86/CD9/CDH1/CEBPB/CTLA4/CX3CL1/CXCL12/CXCL13/DPP4/EFNB2/ELANE/EPCAM/EPO/ERBB2/FCGR2B/FGB/FOXJ1/FOXO3/FOXP3/FUT4/GATA3/GLI2/HAS2/HLA-DRA/HLA-DRB1/HMGB1/ICOS/IDO1/IFNA2/IFNB1/IFNG/IGF1/IGF2/IGFBP2/IL10/IL12B/IL15/IL18/IL1A…	147
GO:0043410	BP	GO:0043410	positive regulation of MAPK cascade	145/754	495/18614	2.46197e-85	1.53189e-82	5.43936e-83	ABL1/ACTA2/AGER/ANGPT1/APOE/APP/AR/AXIN1/BMP2/BMP4/C5AR1/CCL1/CCL11/CCL13/CCL17/CCL18/CCL19/CCL2/CCL20/CCL21/CCL22/CCL24/CCL26/CCL3/CCL4/CCL5/CCL7/CCL8/CCN2/CCR1/CCR7/CD27/CD4/CD40/CD44/CDC42/CDH2/CFLAR/CHI3L1/CSF1R/CTNNB1/CX3CL1/CXCL17/DKK1/EDN1/EGF/EGFR/ELANE/EPO/ERBB2/ERN1/F2R/F2RL1/FCGR2B/FGB/FGF1/FGF10/FGF2/FGFR1/FGFR2/FLT1/FLT3/GDF15/HGF/HLA-DRB1/HMGB1/ICAM1/IGF1/IGF1R/IGF2/IGFBP3/IL11/IL1A…	145
GO:1903131	BP	GO:1903131	mononuclear cell differentiation	137/754	474/18614	1.35536e-79	5.83849e-77	2.0731e-77	ABL1/ACTB/ADAM17/AGER/AICDA/ANXA1/APCS/ATG5/AXL/B2M/BAX/BCL2/BMP4/BTK/CCL19/CCR2/CCR6/CCR7/CD19/CD2/CD27/CD28/CD4/CD40LG/CD79A/CD80/CD86/CD8A/CEBPB/CSF1/CSF1R/CSF2/CTLA4/CTNNB1/CTSK/CTSL/DROSHA/EGR1/EP300/ERBB2/F2RL1/FASN/FCGR2B/FLT3/FOS/FOXJ1/FOXO3/FOXP3/GATA3/GLI2/HDAC9/HLA-DRA/HLA-DRB1/HMGB1/IFNA1/IFNA2/IFNB1/IFNG/IL10/IL11/IL12B/IL15/IL18/IL1A/IL1B/IL2/IL21/IL23A/IL27/IL2RA/IL4/IL4R/IL6/IL6R/…	137
GO:0048018	MF	GO:0048018	receptor ligand activity	137/751	497/18369	3.80517e-76	1.01598e-73	6.95611e-74	ADIPOQ/ADM/AGT/ANGPTL3/APOA1/AREG/BMP1/BMP2/BMP4/BMP7/CALCA/CCL1/CCL11/CCL13/CCL17/CCL18/CCL19/CCL2/CCL20/CCL21/CCL22/CCL24/CCL26/CCL3/CCL4/CCL5/CCL7/CCL8/CCN2/CD40LG/CSF1/CSF2/CSF3/CX3CL1/CXCL1/CXCL10/CXCL11/CXCL12/CXCL13/CXCL14/CXCL16/CXCL2/CXCL3/CXCL5/CXCL6/CXCL8/CXCL9/DKK1/DPP4/EDN1/EGF/EPO/EREG/F2/FASLG/FGF1/FGF10/FGF2/FGF7/FGF9/GDF15/GPHA2/GREM1/GRP/HBEGF/HGF/HMGB1/IFNA1/IFNA2/IFNB1/IFNG/IG…	137
GO:0045785	BP	GO:0045785	positive regulation of cell adhesion	131/754	482/18614	2.57314e-72	7.2048e-70	2.55825e-70	ABL1/ACTB/AGER/AIF1/AKT1/ALOX5/ANGPT1/ANXA1/APOA1/B2M/BMP7/CAV1/CCL19/CCL2/CCL21/CCL5/CCR2/CCR7/CD209/CD27/CD274/CD28/CD4/CD40LG/CD44/CD47/CD5/CD80/CD86/CDC42/CSF1/CX3CL1/CXCL12/CXCL13/DPP4/EFNB2/ELANE/EPO/ERBB2/FGB/FN1/FOXO3/FOXP3/FUT1/FUT4/GATA3/GLI2/GSK3B/HAS2/HLA-DRA/HLA-DRB1/HMGB1/ICOS/IFNG/IGF1/IGF2/IGFBP2/IL10/IL12B/IL15/IL18/IL1A/IL1B/IL2/IL21/IL23A/IL2RA/IL4/IL4R/IL6/IL6ST/IL7/IL7R/ITGAV…	131
GO:0002237	BP	GO:0002237	response to molecule of bacterial origin	130/754	366/18614	3.8146e-88	4.27235e-85	1.51701e-85	ABL1/ACE/ADAM17/ADM/AICDA/AKT1/ARG1/AXL/B2M/BTK/C5AR1/CAMP/CASP1/CASP3/CASP8/CASP9/CCL2/CCL3/CCL5/CCR5/CCR7/CD14/CD274/CD68/CD80/CD86/CEBPB/CSF1/CSF2/CSF2RB/CSF3/CX3CL1/CX3CR1/CXCL1/CXCL10/CXCL11/CXCL13/CXCL2/CXCL3/CXCL5/CXCL6/CXCL8/CXCL9/EDN1/EFNB2/ELANE/EPHB2/EPO/F2R/FASLG/FCGR2B/FGF10/FGFR2/FOS/FOXP3/HMGB1/IDO1/IFNAR1/IL10/IL10RA/IL12B/IL13/IL18/IL1A/IL1B/IL24/IL37/IL6/IRAK3/IRF3/IRF5/IRF8/JAK…	130
GO:0007159	BP	GO:0007159	leukocyte cell-cell adhesion	130/754	415/18614	2.9172e-80	1.36136e-77	4.83386e-78	ABL1/ACTB/ADORA2A/AGER/AIF1/AKT1/ALOX5/ANXA1/ARG1/B2M/BMP4/BMP7/CASP3/CAV1/CCL19/CCL2/CCL21/CCL5/CCR2/CCR7/CD209/CD27/CD274/CD28/CD4/CD40LG/CD44/CD47/CD5/CD80/CD86/CEBPB/CTLA4/CX3CR1/CXCL12/DPP4/EFNB2/ELANE/EPO/ERBB2/FCGR2B/FOXJ1/FOXO3/FOXP3/FUT4/GATA3/GLI2/HAS2/HLA-DRA/HLA-DRB1/HMGB1/ICAM1/ICOS/IDO1/IFNA2/IFNB1/IFNG/IGF1/IGF2/IGFBP2/IL10/IL12B/IL15/IL18/IL1A/IL1B/IL2/IL21/IL23A/IL2RA/IL4/IL4R/IL…	130
GO:0050867	BP	GO:0050867	positive regulation of cell activation	129/754	394/18614	2.45003e-82	1.37202e-79	4.8717e-80	ABL1/ACTA2/ACTB/ADORA2B/AGER/AIF1/AKT1/ANXA1/AXL/B2M/BCL2/BTK/CAV1/CCL19/CCL2/CCL21/CCL3/CCL5/CCN2/CCR2/CCR7/CD2/CD209/CD27/CD274/CD28/CD38/CD4/CD40/CD40LG/CD47/CD5/CD80/CD86/CDKN1A/CEBPA/DPP4/EFNB2/EPHB2/EPO/F2RL1/FCGR3A/FGF10/FOXO3/FOXP3/GATA3/GLI2/HLA-DRA/HLA-DRB1/HMGB1/ICOS/IFNG/IGF1/IGF2/IGFBP2/IL10/IL12B/IL13/IL15/IL18/IL1A/IL1B/IL1RL1/IL2/IL21/IL23A/IL2RA/IL33/IL4/IL4R/IL5/IL6/IL6ST/IL7/IL…	129
GO:0050727	BP	GO:0050727	regulation of inflammatory response	129/754	414/18614	2.66312e-79	1.06525e-76	3.78243e-77	ACE/ACE2/ADIPOQ/ADORA2A/ADORA2B/AGER/AGT/AGTR1/AIM2/ALOX5/ANXA1/APCS/APOA1/APOE/APP/BTK/C3/CASP1/CCL1/CCL24/CCL3/CCL5/CCN4/CCR2/CCR7/CD28/CD47/CDH5/CEBPA/CEBPB/CMA1/CX3CL1/CXCL17/DROSHA/ELANE/ENPP3/ESR1/FABP4/FCGR1A/FCGR2B/FOXP3/FURIN/GATA3/HGF/HLA-DRB1/IDO1/IFNG/IGF1/IL10/IL12B/IL13/IL15/IL17RA/IL18/IL1B/IL1R1/IL1RL1/IL2/IL21/IL23A/IL2RA/IL33/IL37/IL4/IL6/IL6ST/INS/IRF3/JAK2/KLF4/LGALS1/MAPK14/M…	129
GO:0070661	BP	GO:0070661	leukocyte proliferation	128/754	348/18614	5.74856e-89	8.04799e-86	2.85764e-86	ABL1/ACE/AGER/AHR/AIF1/ANXA1/ARG1/BAX/BCL2/BCL2L1/BID/BMP4/BTK/CASP3/CCL19/CCL5/CCR2/CD19/CD209/CD274/CD28/CD38/CD40/CD40LG/CD79A/CD80/CD86/CDKN1A/CEBPB/CRP/CSF1/CSF1R/CSF2/CSF2RB/CTLA4/CTNNB1/CX3CL1/ENPP3/EPHB2/EPO/ERBB2/F2RL1/FCGR2B/FCGR3A/FGF10/FLT3/FOXJ1/FOXP3/GREM1/HLA-DRB1/HMGB1/HPRT1/IDO1/IFNA1/IFNA2/IFNB1/IGF1/IGF2/IGFBP2/IL10/IL12B/IL13/IL15/IL18/IL1A/IL1B/IL2/IL21/IL23A/IL27/IL2RA/IL33/…	128
GO:0042060	BP	GO:0042060	wound healing	127/754	439/18614	1.20932e-73	3.98364e-71	1.41449e-71	ACTA2/ACTB/ACVRL1/ADAM17/ADORA2A/ALOX5/ANXA1/ANXA5/APCS/APOE/AXL/CASP3/CASP7/CAV1/CCN4/CD34/CD40/CD40LG/CD44/CD9/CDKN1A/CFLAR/CLDN4/COL1A1/COL3A1/CX3CL1/CXCR4/EDN1/EPHB2/ERBB2/EREG/F10/F2/F2R/F2RL1/F3/FAP/FGB/FGF1/FGF10/FGF2/FGFR2/GNA13/HBEGF/HIF1A/HMOX1/HPS4/HSPB1/IGF1/IL1A/IL24/IL33/IL6/IL6ST/INS/ITGB1/ITGB3/ITGB6/JAK2/KDR/LCK/LOX/MAPK14/MERTK/MIR29A/MIR34A/MMP12/MMRN1/MRTFA/MTOR/NFE2L2/NOS3/OC…	127
GO:0032496	BP	GO:0032496	response to lipopolysaccharide	126/754	345/18614	4.32248e-87	3.02573e-84	1.07436e-84	ABL1/ACE/ADAM17/ADM/AICDA/AKT1/ARG1/AXL/BTK/CAMP/CASP1/CASP3/CASP8/CASP9/CCL2/CCL3/CCL5/CCR5/CCR7/CD14/CD274/CD68/CD80/CD86/CEBPB/CSF1/CSF2/CSF2RB/CSF3/CX3CL1/CX3CR1/CXCL1/CXCL10/CXCL11/CXCL13/CXCL2/CXCL3/CXCL5/CXCL6/CXCL8/CXCL9/EDN1/EFNB2/ELANE/EPHB2/EPO/F2R/FASLG/FGF10/FGFR2/FOS/FOXP3/HMGB1/IDO1/IFNAR1/IL10/IL10RA/IL12B/IL13/IL18/IL1A/IL1B/IL24/IL37/IL6/IRAK3/IRF3/IRF8/JAK2/LGALS9/MAP2K7/MAPK1/…	126
GO:0002696	BP	GO:0002696	positive regulation of leukocyte activation	125/754	377/18614	1.82735e-80	9.3029e-78	3.30323e-78	ABL1/ACTB/ADORA2B/AGER/AIF1/AKT1/ANXA1/AXL/B2M/BCL2/BTK/CAV1/CCL19/CCL2/CCL21/CCL3/CCL5/CCR2/CCR7/CD2/CD209/CD27/CD274/CD28/CD38/CD4/CD40/CD40LG/CD47/CD5/CD80/CD86/CDKN1A/CEBPA/DPP4/EFNB2/EPHB2/EPO/F2RL1/FCGR3A/FGF10/FOXO3/FOXP3/GATA3/GLI2/HLA-DRA/HLA-DRB1/HMGB1/ICOS/IFNG/IGF1/IGF2/IGFBP2/IL10/IL12B/IL13/IL15/IL18/IL1A/IL1B/IL1RL1/IL2/IL21/IL23A/IL2RA/IL33/IL4/IL4R/IL5/IL6/IL6ST/IL7/IL7R/ITGAM/IT…	125
GO:0050673	BP	GO:0050673	epithelial cell proliferation	122/754	488/18614	1.13675e-62	1.9893e-60	7.06353e-61	ACVRL1/ADAM17/AGTR1/AKT1/ALOX5/APOA1/APOE/AR/AREG/ARG1/B2M/BAX/BCL2L1/BID/BMP2/BMP4/BMPR2/BTK/C5AR1/CAV1/CCL11/CCL2/CCL24/CCL26/CCND1/CCR3/CD34/CDC42/CEBPB/CFLAR/CTNNB1/CXCL12/EFNB2/EGF/EGFR/ERBB2/EREG/ERN1/ESR1/F3/FAP/FGF1/FGF10/FGF2/FGF7/FGF9/FGFR1/FGFR2/FLT1/FUT1/GATA3/GLI1/HAS2/HGF/HIF1A/HMGB1/HMOX1/IGF1/IGF2/IGFBP3/IGFBP5/IL10/IL12B/IL17A/IL6/IRF6/ITGB3/JUN/KDR/KIT/LEP/LGR5/LOXL2/MAP2K1/MAPK…	122
GO:0060326	BP	GO:0060326	cell chemotaxis	121/754	312/18614	3.35165e-87	2.68132e-84	9.5207e-85	ADAM10/ADAM17/AGTR1/AIF1/ALOX5/ANXA1/BCAR1/BSG/C5AR1/CALCA/CCL1/CCL11/CCL13/CCL17/CCL18/CCL19/CCL2/CCL20/CCL21/CCL22/CCL24/CCL26/CCL3/CCL4/CCL5/CCL7/CCL8/CCR1/CCR2/CCR5/CCR6/CCR7/CSF1/CSF1R/CX3CL1/CX3CR1/CXCL1/CXCL10/CXCL11/CXCL12/CXCL13/CXCL14/CXCL16/CXCL17/CXCL2/CXCL3/CXCL5/CXCL6/CXCL8/CXCL9/CXCR1/CXCR2/CXCR4/CXCR5/DPP4/DUSP1/EDN1/F2RL1/FGF1/FGF2/FGFR1/FLT1/GREM1/HBEGF/HGF/HMGB1/HSPB1/IL10/IL17…	121
GO:1903037	BP	GO:1903037	regulation of leukocyte cell-cell adhesion	119/754	378/18614	1.46367e-73	4.55363e-71	1.61688e-71	ABL1/ACTB/ADORA2A/AGER/AIF1/AKT1/ALOX5/ANXA1/ARG1/B2M/BMP4/CASP3/CAV1/CCL19/CCL2/CCL21/CCL5/CCR2/CCR7/CD209/CD27/CD274/CD28/CD4/CD40LG/CD44/CD47/CD5/CD80/CD86/CEBPB/CTLA4/CXCL12/DPP4/EFNB2/ELANE/EPO/ERBB2/FCGR2B/FOXJ1/FOXO3/FOXP3/FUT4/GATA3/GLI2/HAS2/HLA-DRA/HLA-DRB1/HMGB1/ICOS/IDO1/IFNA2/IFNB1/IFNG/IGF1/IGF2/IGFBP2/IL10/IL12B/IL15/IL18/IL1A/IL1B/IL2/IL21/IL23A/IL2RA/IL4/IL4R/IL6/IL6ST/IL7/IL7R/I…	119
GO:0050863	BP	GO:0050863	regulation of T cell activation	116/754	377/18614	2.05565e-70	5.23257e-68	1.85796e-68	ABL1/ACTB/ADORA2A/AGER/AIF1/AKT1/ANXA1/ARG1/B2M/BID/BMP4/CASP3/CAV1/CCL19/CCL2/CCL21/CCL5/CCR2/CCR7/CD2/CD209/CD27/CD274/CD28/CD4/CD40LG/CD47/CD5/CD80/CD86/CEBPB/CTLA4/CTNNB1/DPP4/DROSHA/EFNB2/EPO/ERBB2/FCGR2B/FOXJ1/FOXO3/FOXP3/GATA3/GLI2/HLA-DRA/HLA-DRB1/HMGB1/ICOS/IDO1/IFNA2/IFNB1/IFNG/IGF1/IGF2/IGFBP2/IL10/IL12B/IL15/IL18/IL1A/IL1B/IL2/IL21/IL23A/IL27/IL2RA/IL4/IL4R/IL6/IL6ST/IL7/IL7R/IRF1/IRF…	116
GO:0030098	BP	GO:0030098	lymphocyte differentiation	116/754	422/18614	2.12043e-64	3.95814e-62	1.40544e-62	ABL1/ACTB/ADAM17/AICDA/ANXA1/ATG5/AXL/B2M/BAX/BCL2/BMP4/BTK/CCL19/CCR2/CCR6/CCR7/CD19/CD2/CD27/CD28/CD4/CD40LG/CD79A/CD80/CD86/CD8A/CTLA4/CTNNB1/CTSL/DROSHA/EGR1/EP300/ERBB2/FCGR2B/FLT3/FOXJ1/FOXO3/FOXP3/GATA3/GLI2/HDAC9/HLA-DRA/HLA-DRB1/HMGB1/IFNA1/IFNA2/IFNB1/IFNG/IL10/IL11/IL12B/IL15/IL18/IL1A/IL1B/IL2/IL21/IL23A/IL27/IL2RA/IL4/IL4R/IL6/IL6R/IL7/IL7R/IL9/IRF1/IRF4/IRF8/ITGB1/ITK/JAK3/JUNB/KIT/…	116
GO:0033674	BP	GO:0033674	positive regulation of kinase activity	116/754	430/18614	2.02526e-63	3.65854e-61	1.29906e-61	ABL1/ACE/ADAM17/ADIPOQ/AGER/AGT/AKT1/ALK/ANGPT1/AREG/AXIN1/AXIN2/AXL/CALCA/CCL19/CCL21/CCL5/CCND1/CCR7/CD19/CD4/CD40/CD86/CDC42/CDKN1A/CHI3L1/CSF1/CSF1R/DKK1/EDN1/EGF/EGFR/EGR1/ELANE/EPO/ERBB2/EREG/ERN1/F2/FCGR1A/FGF1/FGF2/FGFR1/FGFR2/FLT1/FLT3/GREM1/HBEGF/HLA-DRB1/HMGA2/HSP90AA1/IFNG/IGF1/IGF1R/IL12B/IL18/IL1B/IL23A/IL4/IL6R/INS/ITGB3/JAK2/KDR/KIT/KITLG/LEP/MAP2K1/MAP2K6/MAP2K7/MAP3K7/MERTK/MET/…	116
GO:0031349	BP	GO:0031349	positive regulation of defense response	116/754	441/18614	4.12376e-62	6.79207e-60	2.4117e-60	ACE/ADORA2B/AGT/AGTR1/AIM2/APP/ARG1/BTK/C3/CASP1/CAV1/CCL1/CCL24/CCL3/CCL5/CCN4/CCR2/CCR7/CD14/CD28/CD40/CD47/CEBPA/CEBPB/CREBBP/CX3CL1/EP300/EREG/ESR1/F2RL1/FABP4/FCGR1A/FCN1/GRP/HMGB1/HSP90AA1/HSPA1A/IDO1/IFIH1/IFNB1/IFNG/IL12B/IL15/IL17A/IL17F/IL17RA/IL18/IL1B/IL1RL1/IL2/IL21/IL23A/IL33/IL6/IL6ST/IRAK3/IRF1/IRF3/IRF4/IRF7/JAK2/LAMP1/LGALS1/MAP2K6/MAP3K7/MAPK3/MAPKAPK2/MAVS/MIR126/MIR146A/MIR21…	116
GO:0005126	MF	GO:0005126	cytokine receptor binding	115/751	270/18369	6.10772e-88	4.89229e-85	3.3496e-85	ADAM17/BID/CASP3/CASP8/CCL1/CCL11/CCL13/CCL17/CCL18/CCL19/CCL2/CCL20/CCL21/CCL22/CCL24/CCL26/CCL3/CCL4/CCL5/CCL7/CCL8/CCR2/CD40LG/CDH5/CFLAR/CSF1/CSF2/CSF3/CX3CL1/CX3CR1/CXCL1/CXCL10/CXCL11/CXCL12/CXCL13/CXCL14/CXCL16/CXCL2/CXCL3/CXCL5/CXCL6/CXCL8/CXCL9/ENG/EPO/FASLG/GATA3/GREM1/IFNA1/IFNA2/IFNB1/IFNG/IL10/IL11/IL12B/IL13/IL15/IL17F/IL18/IL1A/IL1B/IL1RN/IL2/IL21/IL22/IL23A/IL25/IL27/IL3/IL33/IL37…	115
GO:0018108	BP	GO:0018108	peptidyl-tyrosine phosphorylation	114/754	370/18614	3.03663e-69	7.08547e-67	2.51587e-67	ABL1/ACE/ADAM17/ADIPOQ/AGT/ALK/ANGPT1/ANGPT4/APP/AREG/AXL/BTK/CAV1/CCL5/CD4/CD40/CD44/CD80/CSF1R/CSF2/CSF3/EGF/EGFR/ENPP2/EPHB2/EPO/ERBB2/EREG/FCGR1A/FGF10/FGF7/FGFR1/FGFR2/FLT1/FLT3/GREM1/HBEGF/HGF/IFNA2/IFNG/IGF1/IGF1R/IGF2/IL11/IL12B/IL13/IL15/IL18/IL2/IL21/IL23A/IL24/IL3/IL4/IL5/IL6/IL6R/IL6ST/IL7/IL9/ITGB2/ITGB3/ITK/JAK1/JAK2/JAK3/KDR/KIT/KITLG/LCK/LEP/LIF/MAP2K1/MAP2K6/MAP2K7/MAPK3/MERTK/ME…	114
GO:0018212	BP	GO:0018212	peptidyl-tyrosine modification	114/754	372/18614	5.88898e-69	1.2684e-66	4.50376e-67	ABL1/ACE/ADAM17/ADIPOQ/AGT/ALK/ANGPT1/ANGPT4/APP/AREG/AXL/BTK/CAV1/CCL5/CD4/CD40/CD44/CD80/CSF1R/CSF2/CSF3/EGF/EGFR/ENPP2/EPHB2/EPO/ERBB2/EREG/FCGR1A/FGF10/FGF7/FGFR1/FGFR2/FLT1/FLT3/GREM1/HBEGF/HGF/IFNA2/IFNG/IGF1/IGF1R/IGF2/IL11/IL12B/IL13/IL15/IL18/IL2/IL21/IL23A/IL24/IL3/IL4/IL5/IL6/IL6R/IL6ST/IL7/IL9/ITGB2/ITGB3/ITK/JAK1/JAK2/JAK3/KDR/KIT/KITLG/LCK/LEP/LIF/MAP2K1/MAP2K6/MAP2K7/MAPK3/MERTK/ME…	114
GO:0002697	BP	GO:0002697	regulation of immune effector process	113/754	384/18614	3.28476e-66	6.56952e-64	2.33267e-64	A2M/ADORA2B/AGER/AHR/ANGPT1/ANXA1/APOA1/ARG1/ATG5/AXL/B2M/BTK/C3/CCL19/CCR2/CD1A/CD1C/CD28/CD40/CD40LG/CD47/CD80/CD86/CX3CR1/CXCL6/ENPP3/EPHB2/F2RL1/FCER2/FCGR1A/FCGR2B/FCN1/FOXJ1/FOXP3/GATA3/HLA-DRA/HLA-DRB1/HMGB1/HMOX1/ICAM1/IFNA2/IFNB1/IFNG/IL10/IL12B/IL13/IL13RA2/IL17A/IL17F/IL18/IL1B/IL1R1/IL2/IL21/IL23A/IL27/IL33/IL4/IL4R/IL5/IL6/IL7R/INS/IRAK3/IRF4/ITGAM/ITGB2/JAK3/JUNB/KIT/KLRB1/LAMP1/LEP…	113
GO:0002683	BP	GO:0002683	negative regulation of immune system process	113/754	487/18614	2.70867e-54	2.80899e-52	9.97403e-53	A2M/ADAR/ADIPOQ/ADORA2A/AHR/AKT1/ANGPT1/ANXA1/APCS/APOA1/ARG1/ATG5/AXL/BMP4/BTK/CASP3/CCL2/CCL21/CCL3/CCR2/CD274/CD47/CD68/CD80/CD86/CEBPA/CEBPB/COL3A1/CTLA4/CTNNB1/CX3CL1/CX3CR1/CXCL12/DPP4/DUSP1/ENPP3/ERBB2/F2RL1/FCGR2B/FN1/FOXJ1/FOXP3/FURIN/GREM1/HLA-DRB1/HMGB1/HMOX1/IDO1/IFNA2/IFNB1/IL10/IL12B/IL13RA2/IL1RL1/IL2/IL2RA/IL33/IL4/IL4R/IL7R/INS/IRAK3/IRF1/IRF4/ISG15/JAK3/KITLG/LGALS3/LGALS9/MAFB/…	113
GO:0001667	BP	GO:0001667	ameboidal-type cell migration	112/754	496/18614	1.65162e-52	1.56763e-50	5.56628e-51	ABL1/ACTA2/ACVRL1/ADAM17/AGT/AGTR2/AKT1/ANGPT1/ANGPT2/ANGPT4/ANXA1/APOA1/APOE/BCAR1/BMP4/BMP7/BMPR2/CD40/CDC42/CDH2/CDH5/CXCL13/DPP4/EDN1/EDNRA/EFNB2/EGF/ENPP2/FAP/FGF1/FGF10/FGF2/FGF7/FGFR1/FN1/FUT1/GATA3/GNA13/GREM1/HAS1/HAS2/HBEGF/HDAC9/HIF1A/HMGB1/HMOX1/HSPB1/IFNG/IL4/ITGB1/ITGB3/JUN/KDR/KIT/KITLG/KLF4/LGMN/LOXL2/LRP5/MECP2/MET/MIR126/MIR145/MIR146A/MIR200C/MIR21/MIR29A/MIR29C/MMP9/MTOR/NFE2L…	112
GO:0032943	BP	GO:0032943	mononuclear cell proliferation	109/754	313/18614	1.57955e-72	4.65552e-70	1.65306e-70	ABL1/ACE/AGER/AHR/AIF1/ANXA1/ARG1/BAX/BCL2/BCL2L1/BID/BMP4/BTK/CASP3/CCL19/CCL5/CCR2/CD19/CD209/CD274/CD28/CD38/CD40/CD40LG/CD79A/CD80/CD86/CDKN1A/CEBPB/CRP/CSF1/CTLA4/CTNNB1/EPHB2/EPO/ERBB2/FCGR2B/FCGR3A/FGF10/FLT3/FOXJ1/FOXP3/HLA-DRB1/HMGB1/HPRT1/IDO1/IFNA1/IFNA2/IFNB1/IGF1/IGF2/IGFBP2/IL10/IL12B/IL13/IL15/IL18/IL1A/IL1B/IL2/IL21/IL23A/IL27/IL2RA/IL4/IL5/IL6/IL6ST/IL7/IL7R/IL9/IRF1/JAK2/JAK3/KI…	109
GO:0022409	BP	GO:0022409	positive regulation of cell-cell adhesion	108/754	321/18614	4.81219e-70	1.17166e-67	4.16028e-68	ABL1/ACTB/AGER/AIF1/AKT1/ALOX5/ANXA1/B2M/BMP7/CAV1/CCL19/CCL2/CCL21/CCL5/CCR2/CCR7/CD209/CD27/CD274/CD28/CD4/CD40LG/CD44/CD47/CD5/CD80/CD86/CX3CL1/CXCL13/DPP4/EFNB2/ELANE/EPO/FGB/FOXO3/FOXP3/FUT4/GATA3/GLI2/HAS2/HLA-DRA/HLA-DRB1/HMGB1/ICOS/IFNG/IGF1/IGF2/IGFBP2/IL10/IL12B/IL15/IL18/IL1A/IL1B/IL2/IL21/IL23A/IL2RA/IL4/IL4R/IL6/IL6ST/IL7/IL7R/ITGB2/JAK1/JAK2/JAK3/KITLG/LCK/LEF1/LEP/LGALS1/LGALS9/MIR…	108
GO:0051251	BP	GO:0051251	positive regulation of lymphocyte activation	108/754	327/18614	4.40741e-69	9.87261e-67	3.50552e-67	ABL1/ACTB/AGER/AIF1/AKT1/ANXA1/AXL/B2M/BCL2/BTK/CAV1/CCL19/CCL2/CCL21/CCL5/CCR2/CCR7/CD209/CD27/CD274/CD28/CD38/CD4/CD40/CD40LG/CD47/CD5/CD80/CD86/CDKN1A/DPP4/EFNB2/EPHB2/EPO/FCGR3A/FGF10/FOXO3/FOXP3/GATA3/GLI2/HLA-DRA/HLA-DRB1/HMGB1/ICOS/IFNG/IGF1/IGF2/IGFBP2/IL10/IL12B/IL13/IL15/IL18/IL1A/IL1B/IL2/IL21/IL23A/IL2RA/IL4/IL4R/IL5/IL6/IL6ST/IL7/IL7R/JAK2/JAK3/KITLG/LAMP1/LCK/LEF1/LEP/LGALS1/LGALS9/…	108
GO:1903706	BP	GO:1903706	regulation of hemopoiesis	108/754	415/18614	3.14555e-57	3.91446e-55	1.38993e-55	ABL1/ACTB/ADIPOQ/AGER/ANXA1/APCS/AXL/B2M/BMP4/BTK/CASP8/CCL19/CCL3/CCR1/CCR2/CD2/CD27/CD28/CD4/CD80/CD86/CEBPA/CEBPB/CREB1/CSF1/CSF3/CTLA4/CTNNB1/DROSHA/ERBB2/FCGR2B/FOS/FOXJ1/FOXO3/FOXP3/GATA3/GLI2/HIF1A/HLA-DRA/HLA-DRB1/HMGB1/HSPA1A/IFNA2/IFNB1/IFNG/IL10/IL12B/IL15/IL17A/IL18/IL2/IL23A/IL27/IL2RA/IL4/IL4R/IL5/IL7/IL7R/IRF1/IRF4/IRF7/ISG15/JAK3/JUNB/KITLG/LEF1/LGALS9/LIF/LOX/MAFB/MAPK14/MIR145/M…	108
GO:0009897	CC	GO:0009897	external side of plasma membrane	106/756	426/19518	6.72185e-56	3.08533e-53	2.19344e-53	ACE/ADGRE1/ANPEP/ANXA1/ANXA5/B2M/CCR1/CCR5/CD14/CD163/CD19/CD1A/CD1C/CD2/CD207/CD209/CD27/CD274/CD28/CD34/CD4/CD40/CD40LG/CD5/CD69/CD79A/CD80/CD86/CD8A/CD9/CDH5/CSF2RB/CTLA4/CTSB/CTSK/CXCL10/CXCL12/CXCL9/ECE1/ENG/ENPP3/F10/F2/F3/FAS/FASLG/FCER2/FCGR1A/FCGR2B/FCGR3A/FCN1/FGB/FOLR2/HLA-DRB1/IL12B/IL13/IL13RA1/IL13RA2/IL17A/IL1R1/IL1RL1/IL2RA/IL2RB/IL3RA/IL4R/IL6R/IL6ST/IL7R/ITGA1/ITGAE/ITGAL/ITGAM/…	106
GO:0046651	BP	GO:0046651	lymphocyte proliferation	104/754	306/18614	6.46556e-68	1.34101e-65	4.76158e-66	ABL1/AGER/AHR/AIF1/ANXA1/ARG1/BAX/BCL2/BID/BMP4/BTK/CASP3/CCL19/CCL5/CCR2/CD19/CD209/CD274/CD28/CD38/CD40/CD40LG/CD79A/CD80/CD86/CDKN1A/CEBPB/CTLA4/CTNNB1/EPHB2/EPO/ERBB2/FCGR2B/FCGR3A/FGF10/FLT3/FOXJ1/FOXP3/HLA-DRB1/HMGB1/HPRT1/IDO1/IFNA1/IFNA2/IFNB1/IGF1/IGF2/IGFBP2/IL10/IL12B/IL13/IL15/IL18/IL1A/IL1B/IL2/IL21/IL23A/IL27/IL2RA/IL4/IL5/IL6/IL6ST/IL7/IL7R/IL9/IRF1/JAK2/JAK3/KITLG/LEF1/LEP/LGALS3/…	104
GO:0070371	BP	GO:0070371	ERK1 and ERK2 cascade	104/754	341/18614	1.44338e-62	2.44938e-60	8.69714e-61	ABL1/ACE2/ACTA2/ADIPOQ/AGER/AGT/ANGPT1/APOE/APP/ATF3/BMP2/BMP4/C5AR1/CCL1/CCL11/CCL13/CCL17/CCL18/CCL19/CCL2/CCL20/CCL21/CCL22/CCL24/CCL26/CCL3/CCL4/CCL5/CCL7/CCL8/CCN2/CCR1/CCR7/CD4/CD44/CFLAR/CHI3L1/CSF1R/CX3CL1/CXCL17/DUSP6/EDN1/EGF/EGFR/EPHB2/EPO/ERBB2/F2R/F2RL1/FGB/FGF1/FGF10/FGF2/FGFR2/FN1/HLA-DRB1/HMGB1/ICAM1/IGF1/IL1A/IL1B/ITGAV/ITGB3/JUN/KDR/LGALS9/LIF/MAP2K1/MAP2K7/MAPK1/MAPK3/MARCO/MIF…	104
GO:0097529	BP	GO:0097529	myeloid leukocyte migration	103/754	241/18614	3.54121e-79	1.32205e-76	4.69428e-77	AGER/AIF1/ANXA1/BSG/C5AR1/CALCA/CCL1/CCL11/CCL13/CCL17/CCL18/CCL19/CCL2/CCL20/CCL21/CCL22/CCL24/CCL26/CCL3/CCL4/CCL5/CCL7/CCL8/CCR1/CCR2/CCR7/CD47/CD9/CSF1/CSF1R/CX3CL1/CX3CR1/CXCL1/CXCL10/CXCL11/CXCL12/CXCL13/CXCL17/CXCL2/CXCL3/CXCL5/CXCL6/CXCL8/CXCL9/CXCR1/CXCR2/DPP4/DUSP1/EDN1/FLT1/FUT4/GREM1/HMGB1/IL17A/IL17RA/IL1A/IL1B/IL1R1/IL23A/IL4/IL6/IL6R/ITGA1/ITGB2/KIT/KITLG/LGALS3/LGMN/MAPK1/MAPK3/MC…	103
GO:0030595	BP	GO:0030595	leukocyte chemotaxis	102/754	241/18614	7.13927e-78	2.49875e-75	8.87243e-76	ADAM10/ADAM17/AIF1/ALOX5/ANXA1/BSG/C5AR1/CALCA/CCL1/CCL11/CCL13/CCL17/CCL18/CCL19/CCL2/CCL20/CCL21/CCL22/CCL24/CCL26/CCL3/CCL4/CCL5/CCL7/CCL8/CCR1/CCR2/CCR5/CCR6/CCR7/CSF1/CSF1R/CX3CL1/CX3CR1/CXCL1/CXCL10/CXCL11/CXCL12/CXCL13/CXCL16/CXCL17/CXCL2/CXCL3/CXCL5/CXCL6/CXCL8/CXCL9/CXCR1/CXCR2/CXCR4/CXCR5/DPP4/DUSP1/EDN1/F2RL1/FLT1/GREM1/HMGB1/IL10/IL17RA/IL1B/IL23A/IL4/IL6/IL6R/ITGA1/ITGB2/KIT/LGALS3/L…	102
GO:0070663	BP	GO:0070663	regulation of leukocyte proliferation	102/754	268/18614	2.71521e-72	7.24056e-70	2.57094e-70	AGER/AHR/AIF1/ANXA1/ARG1/BCL2/BCL2L1/BID/BMP4/BTK/CASP3/CCL19/CCL5/CCR2/CD209/CD274/CD28/CD38/CD40/CD40LG/CD80/CD86/CDKN1A/CEBPB/CRP/CSF1/CSF1R/CSF2/CSF2RB/CTLA4/CTNNB1/ENPP3/EPHB2/EPO/ERBB2/FCGR2B/FCGR3A/FGF10/FOXJ1/FOXP3/GREM1/HLA-DRB1/HMGB1/IDO1/IGF1/IGF2/IGFBP2/IL10/IL12B/IL13/IL15/IL18/IL1A/IL1B/IL2/IL21/IL23A/IL27/IL2RA/IL33/IL4/IL5/IL6/IL6ST/IL7/IRF1/JAK2/JAK3/KIT/KITLG/LEP/LGALS3/LGALS9/M…	102
GO:0045860	BP	GO:0045860	positive regulation of protein kinase activity	102/754	366/18614	3.99643e-57	4.6625e-55	1.65554e-55	ABL1/ACE/ADAM17/ADIPOQ/AGER/AGT/AKT1/ANGPT1/AREG/AXIN1/AXIN2/CALCA/CCL19/CCL21/CCL5/CCND1/CCR7/CD4/CD40/CD86/CDKN1A/CHI3L1/CSF1/CSF1R/DKK1/EDN1/EGF/EGFR/EGR1/ELANE/EPO/ERBB2/EREG/ERN1/FCGR1A/FGF1/FGF2/FGFR1/FLT1/FLT3/GREM1/HBEGF/HMGA2/HSP90AA1/IFNG/IGF1/IL12B/IL18/IL1B/IL23A/IL4/IL6R/INS/ITGB3/JAK2/KIT/KITLG/LEP/MAP2K1/MAP2K6/MAP2K7/MAP3K7/MIF/MIR21/MTOR/NOD2/NOX4/P2RX7/PDGFA/PDGFB/PDGFRB/PIK3CG/…	102
GO:0002443	BP	GO:0002443	leukocyte mediated immunity	102/754	401/18614	5.64471e-53	5.45006e-51	1.93518e-51	ACE/ADAM17/ADORA2B/AGER/AHR/AICDA/ARG1/B2M/BTK/C1QA/C3/CCL3/CCR2/CCR6/CD19/CD1A/CD1C/CD2/CD27/CD28/CD40/CD40LG/CD8A/CSF2RB/CX3CR1/CXCL6/ELANE/F2/F2RL1/FCER2/FCGR1A/FCGR2B/FCGR3A/FOXJ1/FOXP3/GATA3/GRP/GZMB/HLA-DRA/HLA-DRB1/HMGB1/HMOX1/HPRT1/ICAM1/IFNA2/IFNB1/IL10/IL12B/IL13/IL13RA2/IL18/IL1B/IL1R1/IL2/IL21/IL23A/IL2RB/IL4/IL4R/IL6/IL7R/IL9/IRF7/ITGAM/ITGB2/JAK3/KIT/KLRB1/LAMP1/LEP/LGALS9/MAP3K7/MA…	102
GO:0050678	BP	GO:0050678	regulation of epithelial cell proliferation	101/754	419/18614	4.35959e-50	3.34434e-48	1.18749e-48	ACVRL1/ADAM17/AGTR1/AKT1/ALOX5/APOE/AR/AREG/ARG1/B2M/BAX/BID/BMP2/BMP4/BMPR2/BTK/C5AR1/CAV1/CCL11/CCL2/CCL24/CCL26/CCND1/CCR3/CDC42/CFLAR/CTNNB1/CXCL12/EFNB2/EGF/EGFR/ERBB2/EREG/F3/FGF1/FGF10/FGF2/FGF7/FGF9/FGFR1/FGFR2/FLT1/FUT1/GATA3/GLI1/HAS2/HIF1A/HMGB1/HMOX1/IGF1/IGF2/IL10/IL12B/IRF6/ITGB3/JUN/KDR/LEP/MIR126/MIR146A/MIR21/MIR29A/MIR29B1/MIR29C/MIR34A/MMP12/MYC/NEAT1/NOD2/PDGFB/PDX1/PIK3CD/PPA…	101
GO:0005125	MF	GO:0005125	cytokine activity	101/751	235/18369	1.5299e-77	6.12726e-75	4.19515e-75	ADIPOQ/AREG/BMP1/BMP2/BMP4/BMP7/CCL1/CCL11/CCL13/CCL17/CCL18/CCL19/CCL2/CCL20/CCL21/CCL22/CCL24/CCL26/CCL3/CCL4/CCL5/CCL7/CCL8/CD40LG/CSF1/CSF2/CSF3/CX3CL1/CXCL1/CXCL10/CXCL11/CXCL12/CXCL13/CXCL14/CXCL16/CXCL2/CXCL3/CXCL5/CXCL6/CXCL8/CXCL9/EDN1/EPO/FASLG/FGF2/GDF15/GREM1/HMGB1/IFNA1/IFNA2/IFNB1/IFNG/IL10/IL11/IL12B/IL13/IL15/IL17A/IL17F/IL18/IL1A/IL1B/IL1RN/IL2/IL21/IL22/IL23A/IL24/IL25/IL27/IL3/…	101
GO:0030099	BP	GO:0030099	myeloid cell differentiation	100/754	421/18614	5.93964e-49	4.26436e-47	1.51417e-47	ADAR/ADIPOQ/APCS/APP/B2M/BMP2/BMP4/CASP3/CASP8/CASP9/CCL19/CCL3/CCN4/CCR1/CCR7/CD4/CDC42/CEBPA/CEBPB/CFLAR/CREB1/CSF1/CSF1R/CSF2/CSF3/CTNNB1/EP300/EPO/F2RL1/FASN/FLI1/FOS/FOXO3/GATA3/HIF1A/HLA-DRB1/HSPA1A/IFNG/IL11/IL12B/IL15/IL17A/IL1RL1/IL23A/IL25/IL33/IL4/IL5/IRF4/IRF7/IRF8/ISG15/ITGB6/JAK2/JUN/JUNB/KIT/KITLG/LEF1/LIF/LOX/LTBR/MAFB/MAPK14/MIR145/MMP9/MTOR/MYB/MYC/NFKBIA/NR3C1/PARP1/PF4/PIK3CD/…	100
GO:0032102	BP	GO:0032102	negative regulation of response to external stimulus	100/754	446/18614	1.67982e-46	1.0225e-44	3.63064e-45	A2M/ADAR/ADIPOQ/ADORA2A/AIF1/ALOX5/ANGPT2/APCS/APOA1/APOE/ARG1/ATG5/CCL2/CD34/CD9/CDH5/CX3CL1/CXCL13/CXCL17/DPP4/DUSP1/EDN1/ELANE/ENPP3/F2/F2RL1/FAP/FCGR2B/FGB/FGF2/FOXP3/FURIN/GATA3/GREM1/HGF/HLA-DRB1/IGF1/IL10/IL12B/IL13/IL2/IL2RA/IL4/INS/IRAK3/ISG15/KLF4/LEP/LGALS9/MAPK14/MIF/MIR126/MIR145/MIR146A/MIR21/MIR34A/MMP12/MMP28/MMRN1/NFKB1/NLRP3/NOD2/NOS3/NT5E/PARP1/PDGFA/PDGFB/PDGFRA/PLAT/PLAU/PLAU…	100
GO:0002831	BP	GO:0002831	regulation of response to biotic stimulus	100/754	463/18614	6.1695e-45	3.36416e-43	1.19453e-43	A2M/ADAR/AHR/AIM2/APOE/ARG1/ATG5/BTK/CASP1/CASP8/CAV1/CCL5/CD14/CD274/CD40/CREBBP/CX3CL1/CXCL6/EP300/EREG/ESR1/F2RL1/FCGR2B/FCN1/FOXP3/GATA6/HLA-DRB1/HMGB1/HSP90AA1/HSPA1A/IFIH1/IFNB1/IL12B/IL15/IL17A/IL17F/IL1B/IL21/IL23A/IL27/IL4/INS/IRAK3/IRF1/IRF3/IRF4/IRF7/ISG15/KLRB1/LAMP1/LEP/LGALS9/MAP2K6/MAP3K7/MAPK3/MAPKAPK2/MAVS/MIF/MIR146A/MIR21/MMP12/MYD88/NFE2L2/NFKBIA/NLRC4/NLRP1/NLRP3/NOD2/PARP1/P…	100
GO:0090130	BP	GO:0090130	tissue migration	98/754	379/18614	1.39621e-51	1.22168e-49	4.33789e-50	ABL1/ACTA1/ACTA2/ACVRL1/ADAM17/AGT/AGTR2/AKT1/ANGPT1/ANGPT2/ANGPT4/ANXA1/APOA1/APOE/BCAR1/BMP4/BMPR2/CD40/CDH5/CXCL13/DPP4/EDN1/EFNB2/EGF/ENPP2/FAP/FGF1/FGF10/FGF2/FGF7/FGFR1/FUT1/GATA3/GREM1/HAS2/HBEGF/HDAC9/HIF1A/HMGB1/HMOX1/HSPB1/IFNG/IL4/ITGB1/ITGB3/JUN/KDR/KIT/KITLG/KLF4/LGMN/LOXL2/MECP2/MET/MIR126/MIR146A/MIR200C/MIR21/MIR29A/MIR29C/MMP9/MTOR/NFE2L2/NOS3/PDGFB/PIK3CD/PIK3CG/PPARG/PTEN/PTGS2…	98
GO:0048732	BP	GO:0048732	gland development	97/754	441/18614	2.59005e-44	1.36833e-42	4.85859e-43	ABL1/AKT1/AKT2/ANXA1/APOA1/AR/AREG/ARG1/BAX/BCL2/BMP2/BMP4/BMP7/CAV1/CCL11/CCND1/CDH1/CEBPA/CEBPB/CFLAR/CREB1/CSF1/CSF1R/CTNNB1/EDN1/EDNRA/EGF/EGFR/ESR1/FASN/FGF1/FGF10/FGF2/FGF7/FGFR2/GATA3/GATA6/GLI1/GLI2/HGF/HIF1A/HMOX1/IGF2/IGFBP5/IL10/IL6/IRF6/JAK2/JUN/LEF1/LRP5/MAFB/MAP2K1/MAPK1/MAPK3/MET/MMP2/NFKB1/NKX2-1/NR3C1/PDGFA/PDGFRA/PDX1/PITX2/RELA/RIPK3/SHH/SMAD2/SMAD3/SMAD4/SNAI2/SOD1/SOD2/SOX2/S…	97
GO:0070372	BP	GO:0070372	regulation of ERK1 and ERK2 cascade	96/754	315/18614	1.15267e-57	1.46704e-55	5.20909e-56	ABL1/ACE2/ACTA2/ADIPOQ/AGER/ANGPT1/APOE/APP/ATF3/BMP2/BMP4/C5AR1/CCL1/CCL11/CCL13/CCL17/CCL18/CCL19/CCL2/CCL20/CCL21/CCL22/CCL24/CCL26/CCL3/CCL4/CCL5/CCL7/CCL8/CCN2/CCR1/CCR7/CD4/CD44/CFLAR/CHI3L1/CSF1R/CX3CL1/CXCL17/DUSP6/EGFR/EPHB2/EPO/ERBB2/F2R/F2RL1/FGB/FGF1/FGF10/FGF2/FGFR2/FN1/HLA-DRB1/HMGB1/ICAM1/IGF1/IL1A/IL1B/ITGB3/JUN/KDR/LGALS9/LIF/MAP2K1/MAP2K7/MAPK3/MARCO/MIF/MIR126/MIR145/MIR200C/MI…	96
GO:0010631	BP	GO:0010631	epithelial cell migration	96/754	371/18614	1.50294e-50	1.25618e-48	4.4604e-49	ABL1/ACVRL1/ADAM17/AGT/AGTR2/AKT1/ANGPT1/ANGPT2/ANGPT4/ANXA1/APOA1/APOE/BCAR1/BMP4/BMPR2/CD40/CDH5/CXCL13/DPP4/EDN1/EFNB2/EGF/ENPP2/FAP/FGF1/FGF10/FGF2/FGF7/FGFR1/FUT1/GATA3/GREM1/HAS2/HBEGF/HDAC9/HIF1A/HMGB1/HMOX1/HSPB1/IFNG/IL4/ITGB1/ITGB3/JUN/KDR/KIT/KITLG/KLF4/LGMN/LOXL2/MECP2/MET/MIR126/MIR146A/MIR200C/MIR21/MIR29A/MIR29C/MMP9/MTOR/NFE2L2/NOS3/PDGFB/PIK3CD/PIK3CG/PPARG/PTEN/PTGS2/PTK2/PTK2B/…	96
GO:0090132	BP	GO:0090132	epithelium migration	96/754	374/18614	3.29105e-50	2.63284e-48	9.34857e-49	ABL1/ACVRL1/ADAM17/AGT/AGTR2/AKT1/ANGPT1/ANGPT2/ANGPT4/ANXA1/APOA1/APOE/BCAR1/BMP4/BMPR2/CD40/CDH5/CXCL13/DPP4/EDN1/EFNB2/EGF/ENPP2/FAP/FGF1/FGF10/FGF2/FGF7/FGFR1/FUT1/GATA3/GREM1/HAS2/HBEGF/HDAC9/HIF1A/HMGB1/HMOX1/HSPB1/IFNG/IL4/ITGB1/ITGB3/JUN/KDR/KIT/KITLG/KLF4/LGMN/LOXL2/MECP2/MET/MIR126/MIR146A/MIR200C/MIR21/MIR29A/MIR29C/MMP9/MTOR/NFE2L2/NOS3/PDGFB/PIK3CD/PIK3CG/PPARG/PTEN/PTGS2/PTK2/PTK2B/…	96
GO:0001503	BP	GO:0001503	ossification	96/754	429/18614	1.5147e-44	8.07842e-43	2.86845e-43	ADAR/AKT1/ALOX5/AREG/ATF4/AXIN2/BCL2/BMP1/BMP2/BMP4/BMP7/BMPR2/CALCA/CAT/CCL3/CCN2/CCN4/CCR1/CDH11/CEBPA/CEBPB/COL1A1/COL1A2/CSF1/CTNNB1/CTSK/DKK1/EGFR/EIF2AK3/FASN/FGF2/FGF9/FGFR2/GLI1/GLI2/GREM1/GSK3B/HGF/HIF1A/IGF1/IGF2/IGFBP3/IGFBP5/IL6/IL6R/IL6ST/ISG15/JUNB/KL/LEF1/LEP/LOX/LRP5/MAP2K6/MAPK1/MAPK14/MAPK3/MIR200C/MIR21/MIR29B1/MMP13/MMP14/MMP2/P2RX7/PPARG/PTGS2/PTH/PTK2/PTK2B/PTPN11/RHOA/RXRA/…	96
GO:0051090	BP	GO:0051090	regulation of DNA-binding transcription factor activity	96/754	465/18614	2.44641e-41	1.14166e-39	4.05374e-40	AGER/AGT/AIM2/AKT1/ALK/APP/AR/BMP2/BMP7/BTK/CAT/CAV1/CD40/CD40LG/CDKN2A/CFLAR/CHUK/CSF3/CTNNB1/CX3CL1/CX3CR1/DDIT3/EDN1/EP300/ESR1/FOSL1/FOXJ1/FOXP3/GLI1/GLI2/GREM1/HMOX1/HSPA1A/IL10/IL18/IL1B/IL5/IL6/INS/IRAK3/JAK2/KEAP1/KIT/KLF4/LGALS9/LRP5/MAP3K7/MAPK3/MAPK8/MAVS/MIR21/MYD88/NFKBIA/NLRC4/NLRP3/NOD2/PINK1/PLA2G1B/PPARG/PPARGC1A/PTEN/PYCARD/RELA/RIPK2/RIPK3/S100A12/S100A8/S100A9/SHH/SIRT1/SMAD3/…	96
GO:0002460	BP	GO:0002460	adaptive immune response based on somatic recombination of immune receptors built from immunoglobulin superfamily domains	95/754	311/18614	3.6784e-57	4.47806e-55	1.59005e-55	ADAM17/AGER/AHR/AICDA/ANXA1/ARG1/B2M/BTK/C1QA/C3/CCL19/CCR2/CCR6/CD19/CD1A/CD1C/CD27/CD274/CD28/CD4/CD40/CD40LG/CD80/CD8A/CSF2RB/CXCL13/EPHB2/FCER2/FCGR1A/FCGR2B/FCGR3A/FOXJ1/FOXP3/GATA3/HLA-DRA/HLA-DRB1/HMGB1/HPRT1/IFNA2/IFNB1/IL10/IL12B/IL13RA2/IL17RA/IL18/IL1B/IL1R1/IL1RL1/IL2/IL23A/IL27/IL2RB/IL33/IL4/IL4R/IL6/IL6R/IL7R/IL9/IRF4/IRF7/JAK2/JAK3/JUNB/LEF1/MAP3K7/MIR21/MTOR/MYD88/NLRP3/NOD2/P2RX…	95
GO:0009615	BP	GO:0009615	response to virus	95/754	408/18614	1.12522e-45	6.4298e-44	2.28306e-44	ACTA2/ADAR/AICDA/AIM2/ATG5/BAX/BCL2/BCL2L1/BECN1/CASP1/CCL11/CCL19/CCL22/CCL4/CCL5/CCL8/CD207/CD40/CHUK/CXCL10/CXCL12/CXCL9/CXCR4/F2RL1/FOSL1/FOXP3/GATA3/HIF1A/HMGA2/HSP90AA1/HSPB1/IFI27/IFIH1/IFNA1/IFNA2/IFNAR1/IFNB1/IFNG/IL12B/IL15/IL17RA/IL1B/IL21/IL23A/IL27/IL33/IL4/IL6/IRAK3/IRF1/IRF3/IRF5/IRF7/ISG15/ITGAX/ITGB6/JAK1/JAK2/LGALS9/MAPK14/MAVS/MIR146A/MIR21/MIR29B1/MMP12/MX1/MYD88/NFKB1/NLRP1/N…	95
GO:0010720	BP	GO:0010720	positive regulation of cell development	95/754	432/18614	2.1956e-43	1.0978e-41	3.89802e-42	ACE/ACTB/ADIPOQ/AGER/ANXA1/AXL/BCL2/BMP2/BMP4/BMPR2/BTK/CASP8/CCL19/CCR1/CD27/CD4/CD80/CD86/CDH5/CREB1/CSF1/CTNNB1/CX3CL1/CX3CR1/CXCL12/CXCR4/EPHB2/FGF2/FN1/FOS/FOXO3/FOXP3/FZD3/GATA3/GLI2/HIF1A/HLA-DRA/HLA-DRB1/HMGB1/IFNG/IL10/IL12B/IL15/IL17A/IL18/IL1B/IL2/IL23A/IL2RA/IL33/IL4/IL4R/IL5/IL6/IL6ST/IL7/IL7R/ITGB1/KIT/KITLG/KRAS/LEF1/LGALS9/LIF/MAP2K1/MECP2/MIR145/MIR21/MMP14/MTOR/NGF/NLRP3/PF4/PLX…	95
GO:1903039	BP	GO:1903039	positive regulation of leukocyte cell-cell adhesion	94/754	273/18614	6.62915e-62	1.06066e-59	3.76616e-60	ABL1/ACTB/AGER/AIF1/AKT1/ALOX5/ANXA1/B2M/CAV1/CCL19/CCL2/CCL21/CCL5/CCR2/CCR7/CD209/CD27/CD274/CD28/CD4/CD40LG/CD44/CD47/CD5/CD80/CD86/DPP4/EFNB2/ELANE/EPO/FOXO3/FOXP3/FUT4/GATA3/GLI2/HAS2/HLA-DRA/HLA-DRB1/HMGB1/ICOS/IFNG/IGF1/IGF2/IGFBP2/IL12B/IL15/IL18/IL1A/IL1B/IL2/IL21/IL23A/IL2RA/IL4/IL4R/IL6/IL6ST/IL7/IL7R/ITGB2/JAK2/JAK3/KITLG/LCK/LEF1/LEP/LGALS1/LGALS9/MIR21/NLRP3/NOD2/PTPN11/PTPRC/PYCARD…	94
GO:1902105	BP	GO:1902105	regulation of leukocyte differentiation	94/754	319/18614	5.46553e-55	6.00137e-53	2.13094e-53	ABL1/ACTB/ADIPOQ/AGER/ANXA1/APCS/AXL/BMP4/BTK/CASP8/CCL19/CCL3/CCR1/CCR2/CD2/CD27/CD28/CD4/CD80/CD86/CEBPB/CREB1/CSF1/CTLA4/CTNNB1/DROSHA/ERBB2/FCGR2B/FOS/FOXJ1/FOXO3/FOXP3/GATA3/GLI2/HLA-DRA/HLA-DRB1/HMGB1/IFNA2/IFNB1/IFNG/IL10/IL12B/IL15/IL17A/IL18/IL2/IL23A/IL27/IL2RA/IL4/IL4R/IL5/IL7/IL7R/IRF1/IRF4/IRF7/JAK3/JUNB/KITLG/LEF1/LGALS9/LIF/MAFB/MIR145/MIR21/MMP14/MTOR/MYC/NLRP3/PF4/PIK3R1/PTPRC/RH…	94
GO:1901342	BP	GO:1901342	regulation of vasculature development	94/754	355/18614	1.90653e-50	1.57008e-48	5.57498e-49	ABL1/ACVRL1/ADAM10/ADM/AGT/ALOX5/ANGPT2/ANGPT4/ANGPTL3/C3/C5AR1/CAMP/CCL11/CCL24/CCR2/CCR3/CD34/CD40/CDH5/CHI3L1/CMA1/CTNNB1/CX3CR1/CXCL10/CXCL13/CXCL8/CXCR2/CXCR4/CYBB/ENG/ERBB2/F3/FASLG/FGF1/FGF2/FLT1/FUT1/GATA6/GREM1/HGF/HIF1A/HMGA2/HMOX1/HSPB1/IL10/IL17F/IL1A/IL1B/IL6/ITGAX/ITGB1/ITGB3/JAK1/KDR/KLF4/LEP/MECP2/MIR126/MIR145/MIR146A/MIR21/MIR29A/MIR29C/MIR34A/NFE2L2/NOS3/NPPB/PF4/PIK3CD/PPARG/P…	94
GO:0045765	BP	GO:0045765	regulation of angiogenesis	93/754	349/18614	3.61319e-50	2.84984e-48	1.01191e-48	ABL1/ACVRL1/ADM/AGT/ALOX5/ANGPT2/ANGPT4/ANGPTL3/C3/C5AR1/CAMP/CCL11/CCL24/CCR2/CCR3/CD34/CD40/CDH5/CHI3L1/CMA1/CTNNB1/CX3CR1/CXCL10/CXCL13/CXCL8/CXCR2/CXCR4/CYBB/ENG/ERBB2/F3/FASLG/FGF1/FGF2/FLT1/FUT1/GATA6/GREM1/HGF/HIF1A/HMGA2/HMOX1/HSPB1/IL10/IL17F/IL1A/IL1B/IL6/ITGAX/ITGB1/ITGB3/JAK1/KDR/KLF4/LEP/MECP2/MIR126/MIR145/MIR146A/MIR21/MIR29A/MIR29C/MIR34A/NFE2L2/NOS3/NPPB/PF4/PIK3CD/PPARG/PTK2B/RO…	93
GO:0070997	BP	GO:0070997	neuron death	93/754	373/18614	1.90394e-47	1.23978e-45	4.40214e-46	ABL1/ADORA2A/AGTR2/AKT1/AKT2/ANGPT1/APOE/APP/ATF4/ATN1/AXL/BAX/BCL2/BCL2L1/BID/C1QA/CASP3/CASP7/CASP8/CASP9/CCL2/CCL3/CCL5/CCND1/CD34/CEBPB/CSF1/CSF3/CTNNB1/CX3CL1/CX3CR1/DDIT3/DKK1/EFNB2/EGR1/EPO/F2R/FAS/FASLG/FCGR2B/FOS/FOXO3/GAPDH/GATA3/GSK3A/GSK3B/HIF1A/HMOX1/HSPA5/IFNG/IL10/IL13/IL6ST/ITGA1/ITGAM/ITGB2/JAK2/JUN/KDR/KRAS/LGMN/MAP2K7/MCL1/MECP2/MIR200C/NGF/NLRP1/NR3C1/PARP1/PINK1/PPARA/PPARGC1…	93
GO:2001233	BP	GO:2001233	regulation of apoptotic signaling pathway	93/754	381/18614	1.3668e-46	8.41106e-45	2.98656e-45	ADORA2A/AGT/AGTR2/AKT1/AR/ATF3/BAX/BBC3/BCL2/BCL2L1/BECN1/BID/BMP4/CAV1/CD44/CFLAR/CSF2/CTNNB1/CTSK/CTSL/CX3CL1/CX3CR1/CXCL12/DDIT3/EIF2AK3/EPO/FAS/FGB/FGF10/FGFR1/GSK3B/HGF/HIF1A/HMOX1/HSPA1A/HSPB1/ICAM1/IFNB1/IGF1/IL1A/IL1B/IL4/IL7/IL9/INS/ITGAV/JAK2/LCK/LGALS3/LTBR/MCL1/MDM2/MIF/MIR21/MMP9/MUC1/MYC/NFE2L2/NOS3/NOX1/PARP1/PDX1/PF4/PINK1/PLAUR/PRKCD/PTEN/PTGS2/PTPRC/PYCARD/RELA/RIPK3/S100A8/S100…	93
GO:0071216	BP	GO:0071216	cellular response to biotic stimulus	92/754	264/18614	4.08252e-61	6.01634e-59	2.13625e-59	ABL1/AICDA/AKT1/ARG1/AXL/BTK/CAMP/CASP1/CCL2/CCL3/CCL5/CCR5/CD14/CD274/CD68/CD80/CD86/CEBPB/CSF2/CSF3/CX3CL1/CX3CR1/CXCL1/CXCL10/CXCL11/CXCL13/CXCL2/CXCL3/CXCL5/CXCL6/CXCL8/CXCL9/DDIT3/EFNB2/EIF2AK3/EPHB2/FCGR2B/GSK3B/HMGB1/HSPA5/IL10/IL12B/IL18/IL1A/IL1B/IL24/IL37/IL6/IRF3/IRF8/JAK2/MAP2K7/MAPK1/MAPK14/MAPK3/MAPK8/MIF/MIR146A/MIR21/MRC1/MYD88/NFKB1/NFKBIA/NLRP3/NOD2/NOS2/NOS3/PF4/PPBP/PYCARD/REL…	92
GO:0006979	BP	GO:0006979	response to oxidative stress	91/754	434/18614	9.3418e-40	3.93339e-38	1.39665e-38	ABL1/ADIPOQ/AIF1/AKT1/ALOX5/ANXA1/APOE/APP/AREG/ARG1/ATF4/AXL/BCL2/BECN1/BMP7/BTK/CASP3/CAT/CD38/CHUK/COL1A1/CTNNB1/EDN1/EDNRA/EGFR/ERN1/FOS/FOSL1/FOXO3/HGF/HIF1A/HMOX1/HSPA1A/HSPB1/IL10/IL1A/IL6/INS/JAK2/JUN/KDM6B/KEAP1/MAP1LC3A/MAPK1/MAPK3/MAPK8/MCL1/MET/MIR21/MIR29B1/MIR34A/MMP14/MMP2/MMP3/MMP9/MPO/NFE2L2/NOS3/NOX1/PARP1/PDGFRA/PDGFRB/PINK1/PPARGC1A/PRKAA2/PRKCD/PTGS1/PTGS2/PTK2B/RELA/RIPK3/SC…	91
GO:0030217	BP	GO:0030217	T cell differentiation	90/754	300/18614	2.22682e-53	2.26731e-51	8.05065e-52	ABL1/ACTB/ADAM17/ANXA1/ATG5/B2M/BCL2/BMP4/CCL19/CCR2/CCR6/CCR7/CD2/CD27/CD28/CD4/CD80/CD86/CD8A/CTLA4/CTNNB1/CTSL/DROSHA/EGR1/ERBB2/FOXJ1/FOXO3/FOXP3/GATA3/GLI2/HLA-DRA/HLA-DRB1/HMGB1/IFNA2/IFNB1/IFNG/IL12B/IL15/IL18/IL1A/IL1B/IL2/IL21/IL23A/IL27/IL2RA/IL4/IL4R/IL6/IL6R/IL7/IL7R/IRF1/IRF4/ITK/JAK3/JUNB/KIT/LCK/LEF1/LEP/LGALS9/MAFB/MIR21/MTOR/MYB/NLRP3/PIK3CD/PIK3R1/PTPRC/RHOA/RIPK2/RIPK3/RORC/SHH…	90
GO:0070482	BP	GO:0070482	response to oxygen levels	90/754	333/18614	4.13818e-49	3.04918e-47	1.08269e-47	ACE/ACVRL1/ADAM17/ADIPOQ/ADM/AGER/AKT1/ANGPT2/ANGPT4/ATF4/BCL2/BECN1/BMP2/BMP7/CASP3/CAT/CAV1/CCN2/CD34/CD38/CFLAR/COL1A1/CREBBP/CXCL12/CXCR4/CYBB/DPP4/EDN1/EDNRA/EGR1/EP300/EPO/FAS/FOS/GATA6/HIF1A/HMOX1/IL1A/KCNMB1/LEP/LOXL2/LPAR1/MALAT1/MDM2/MECP2/MIR126/MIR145/MIR146A/MIR21/MIR34A/MMP14/MMP2/MTOR/MYC/NFE2L2/NOS2/NOX1/PDGFA/PDGFRB/PDPN/PINK1/PLAT/PLAU/PPARA/PPARG/PTGS2/PTK2B/RHOA/SIRT1/SLC2A1/S…	90
GO:0032944	BP	GO:0032944	regulation of mononuclear cell proliferation	89/754	243/18614	2.74833e-61	4.15964e-59	1.47699e-59	AGER/AHR/AIF1/ANXA1/ARG1/BCL2/BCL2L1/BID/BMP4/BTK/CASP3/CCL19/CCL5/CCR2/CD209/CD274/CD28/CD38/CD40/CD40LG/CD80/CD86/CDKN1A/CEBPB/CRP/CSF1/CTLA4/CTNNB1/EPHB2/EPO/ERBB2/FCGR2B/FCGR3A/FGF10/FOXJ1/FOXP3/HLA-DRB1/HMGB1/IDO1/IGF1/IGF2/IGFBP2/IL10/IL12B/IL13/IL15/IL18/IL1A/IL1B/IL2/IL21/IL23A/IL27/IL2RA/IL4/IL5/IL6/IL6ST/IL7/IRF1/JAK2/JAK3/KITLG/LEP/LGALS3/LGALS9/MIF/MIR21/MYD88/MZB1/PTPRC/PYCARD/RIPK2/…	89
GO:0002263	BP	GO:0002263	cell activation involved in immune response	89/754	300/18614	2.52516e-52	2.31818e-50	8.23129e-51	ABL1/ADORA2B/AICDA/ANXA1/APP/BTK/CCL19/CCL3/CCR2/CCR6/CD19/CD1C/CD28/CD40/CD40LG/CD80/CD86/CX3CR1/ENPP3/F2RL1/FCGR2B/FCGR3A/FOXP3/GATA3/GRP/HLA-DRA/HLA-DRB1/HMGB1/HMOX1/ICAM1/IFNA1/IFNA2/IFNB1/IFNG/IL10/IL12B/IL13/IL13RA2/IL18/IL2/IL21/IL23A/IL27/IL33/IL4/IL4R/IL6/IL6R/IRF4/IRF8/ITGAL/ITGAM/ITGB2/JAK3/JUNB/KIT/LAMP1/LEF1/LGALS1/LGALS3/LGALS9/LRP1/MIR21/MTOR/MYB/MYD88/NLRP3/PIK3CD/PIK3CG/PTGDS/PTK…	89
GO:0062197	BP	GO:0062197	cellular response to chemical stress	89/754	349/18614	2.83065e-46	1.6686e-44	5.92477e-45	ABL1/AIF1/AKT1/ALOX5/ANXA1/AQP5/ARG1/ATF4/ATG5/AXL/BCL2/BECN1/BMP7/BTK/CASP1/CASP3/CAT/CAV1/CHUK/CTNNB1/DDIT3/EDN1/EDNRA/EGFR/EIF2AK3/EPO/ERN1/FAS/FOS/FOXO3/HGF/HIF1A/HMOX1/HSPA1A/HSPB1/IL10/IL6/INS/JAK2/JUN/KDM6B/KEAP1/MAP1LC3A/MAPK1/MAPK3/MAPK8/MCL1/MET/MIR21/MIR29B1/MIR34A/MMP2/MMP3/MMP9/MPO/MTOR/NFE2L2/NLRP3/NOS3/NOX1/PARP1/PDGFRA/PINK1/PPARGC1A/PRKAA2/PRKCD/PTGS2/PYCARD/RELA/RIPK3/SIRPA/SIRT…	89
GO:0002253	BP	GO:0002253	activation of immune response	89/754	495/18614	2.0719e-33	6.2717e-32	2.22692e-32	A2M/ABL1/AIM2/BAX/BCAR1/BCL2/BTK/C1QA/C3/C5AR1/CASP1/CAV1/CCR7/CD14/CD19/CD28/CD38/CD40/CD47/CD79A/CD8A/CFHR1/CREBBP/CTLA4/EP300/ESR1/F2RL1/FCGR2B/FCN1/FOXP3/FPR1/GATA3/HLA-DRB1/HMGB1/HSP90AA1/HSPA1A/IFIH1/IGHE/IL1B/IRAK3/IRF1/IRF3/IRF4/IRF7/ITK/LCK/LGALS3/MAP2K6/MAP3K7/MAPK1/MAPKAPK2/MAVS/MIR146A/MIR34A/MS4A1/MYD88/NFKB1/NFKBIA/NLRC4/NLRP1/NLRP3/NOD2/PIK3CD/PRKCD/PTK2/PTPRC/PYCARD/RELA/RIPK2/SRC…	89
GO:0050730	BP	GO:0050730	regulation of peptidyl-tyrosine phosphorylation	88/754	255/18614	5.01994e-58	6.69325e-56	2.37661e-56	ABL1/ACE/ADAM17/ADIPOQ/AGT/ANGPT1/ANGPT4/APP/AREG/CAV1/CCL5/CD4/CD40/CD44/CD80/CSF1R/CSF2/CSF3/EGF/EGFR/ENPP2/EPO/EREG/FCGR1A/FGF10/FGF7/FLT3/GREM1/HBEGF/HGF/IFNA2/IFNG/IGF1/IGF2/IL11/IL12B/IL13/IL15/IL18/IL2/IL21/IL23A/IL24/IL3/IL4/IL5/IL6/IL6R/IL6ST/IL7/IL9/ITGB2/ITGB3/JAK2/KIT/KITLG/LEP/LIF/MIF/MIR146A/MTOR/NOD2/NOX4/OSM/PARP9/PDGFA/PDGFB/PECAM1/PRKCD/PTK2B/PTPN11/PTPRC/RIPK2/SOCS1/SOCS3/SRC/T…	88
GO:0002685	BP	GO:0002685	regulation of leukocyte migration	87/754	227/18614	7.02567e-62	1.09288e-59	3.88055e-60	ABL1/ADAM10/ADAM17/AGER/AIF1/AKT1/ANXA1/APP/C5AR1/CCL1/CCL19/CCL2/CCL20/CCL21/CCL24/CCL3/CCL4/CCL5/CCL7/CCR1/CCR2/CCR6/CCR7/CD47/CD9/CSF1/CSF1R/CX3CL1/CX3CR1/CXCL10/CXCL12/CXCL13/CXCL17/CXCL8/CXCR2/CXCR3/DPP4/DUSP1/EDN1/ELANE/F2RL1/FUT4/GREM1/HMGB1/HMOX1/ICAM1/IL1A/IL1R1/IL23A/IL33/IL4/IL6/IL6R/ITGB3/KITLG/LGALS3/LGALS9/LGMN/LYVE1/MAPK1/MAPK3/MCU/MIF/MIR146A/MMP14/MMP28/MYD88/NOD2/PIK3R1/PLA2G7/P…	87
GO:0002366	BP	GO:0002366	leukocyte activation involved in immune response	87/754	296/18614	8.99131e-51	7.62899e-49	2.70887e-49	ABL1/ADORA2B/AICDA/ANXA1/BTK/CCL19/CCL3/CCR2/CCR6/CD19/CD1C/CD28/CD40/CD40LG/CD80/CD86/CX3CR1/ENPP3/F2RL1/FCGR2B/FCGR3A/FOXP3/GATA3/GRP/HLA-DRA/HLA-DRB1/HMGB1/HMOX1/ICAM1/IFNA1/IFNA2/IFNB1/IFNG/IL10/IL12B/IL13/IL13RA2/IL18/IL2/IL21/IL23A/IL27/IL33/IL4/IL4R/IL6/IL6R/IRF4/IRF8/ITGAL/ITGAM/ITGB2/JAK3/JUNB/KIT/LAMP1/LEF1/LGALS1/LGALS3/LGALS9/MIR21/MTOR/MYB/MYD88/NLRP3/PIK3CD/PIK3CG/PTGDS/PTK2B/PTPRC/…	87
GO:0071219	BP	GO:0071219	cellular response to molecule of bacterial origin	86/754	237/18614	8.10694e-59	1.13497e-56	4.03e-57	ABL1/AICDA/AKT1/ARG1/AXL/CAMP/CASP1/CCL2/CCL3/CCL5/CCR5/CD14/CD274/CD68/CD80/CD86/CEBPB/CSF2/CSF3/CX3CL1/CX3CR1/CXCL1/CXCL10/CXCL11/CXCL13/CXCL2/CXCL3/CXCL5/CXCL6/CXCL8/CXCL9/EFNB2/EPHB2/FCGR2B/HMGB1/IL10/IL12B/IL18/IL1A/IL1B/IL24/IL37/IL6/IRF3/IRF8/JAK2/MAP2K7/MAPK1/MAPK14/MAPK3/MAPK8/MIF/MIR146A/MIR21/MRC1/MYD88/NFKB1/NFKBIA/NLRP3/NOD2/NOS2/NOS3/PF4/PPBP/PYCARD/RELA/RHOA/RIPK2/SERPINE1/SIRPA/SP…	86
GO:0050670	BP	GO:0050670	regulation of lymphocyte proliferation	86/754	239/18614	1.84306e-58	2.51736e-56	8.93851e-57	AGER/AHR/AIF1/ANXA1/ARG1/BCL2/BID/BMP4/BTK/CASP3/CCL19/CCL5/CCR2/CD209/CD274/CD28/CD38/CD40/CD40LG/CD80/CD86/CDKN1A/CEBPB/CTLA4/CTNNB1/EPHB2/EPO/ERBB2/FCGR2B/FCGR3A/FGF10/FOXJ1/FOXP3/HLA-DRB1/HMGB1/IDO1/IGF1/IGF2/IGFBP2/IL10/IL12B/IL13/IL15/IL18/IL1A/IL1B/IL2/IL21/IL23A/IL27/IL2RA/IL4/IL5/IL6/IL6ST/IL7/IRF1/JAK2/JAK3/KITLG/LEP/LGALS3/LGALS9/MIF/MIR21/MYD88/MZB1/PTPRC/PYCARD/RIPK2/RIPK3/SCGB1A1/SD…	86
GO:0001818	BP	GO:0001818	negative regulation of cytokine production	86/754	371/18614	3.55508e-41	1.60552e-39	5.7008e-40	ADIPOQ/AGER/ANGPT1/ANXA1/APOA1/ARG1/ATG5/AXL/BTK/CCR7/CD274/CD34/CX3CL1/CX3CR1/DDIT3/ELANE/EPHB2/F2/F2RL1/FCGR2B/FN1/FOXJ1/FOXP3/FURIN/GATA3/GATA6/HDAC9/HGF/HLA-DRB1/HMGB1/HMOX1/IDO1/IFNA2/IFNB1/IFNG/IGF1/IL10/IL12B/IL13/IL1R2/IL1RL1/IL23A/IL33/IL37/IL4/IL6/IRAK3/JAK3/KLF4/LEF1/LGALS9/MERTK/MIR145/MIR146A/MIR155/MIR200C/MIR21/MIR215/MIR29B1/MIR34A/MMP8/NFKB1/NLRP3/NOD2/PPARA/PTPRC/PYCARD/RAC1/SCG…	86
GO:0071674	BP	GO:0071674	mononuclear cell migration	85/754	202/18614	1.55259e-64	2.99811e-62	1.06456e-62	ABL1/ADAM10/ADAM17/AGER/AIF1/AKT1/ALOX5/ANXA1/APP/C5AR1/CALCA/CCL1/CCL11/CCL13/CCL17/CCL18/CCL19/CCL2/CCL20/CCL21/CCL22/CCL24/CCL26/CCL3/CCL4/CCL5/CCL7/CCL8/CCR1/CCR2/CCR5/CCR6/CCR7/CD47/CDC42/CSF1/CSF1R/CX3CL1/CX3CR1/CXCL10/CXCL11/CXCL12/CXCL13/CXCL16/CXCL17/CXCR1/CXCR2/CXCR4/DUSP1/FLT1/FUT4/GATA3/GREM1/HMGB1/IL4/IL6/IL6R/ITGAL/ITGB3/LGALS3/LGALS9/LGMN/MAPK1/MAPK3/PDGFB/PECAM1/PIK3CD/PIK3CG/PLA2…	85
GO:0007162	BP	GO:0007162	negative regulation of cell adhesion	85/754	312/18614	1.11216e-46	6.92009e-45	2.45715e-45	ABL1/ACVRL1/ADAM10/ADIPOQ/ADORA2A/AKT1/ANGPT1/ANGPT2/ANXA1/APOA1/ARG1/BMP2/BMP4/CASP3/CCL21/CD274/CD80/CD86/CD9/CDH1/CDKN2A/CEBPB/COL1A1/CTLA4/CX3CL1/CXCL12/DUSP1/EPCAM/EPHB2/ERBB2/FCGR2B/FOXJ1/FOXP3/HLA-DRB1/HMGB1/IDO1/IFNA2/IFNB1/IL10/IL1RN/IL2/IL2RA/IL4/IL4R/IRF1/JAK2/JAK3/KLF4/LGALS3/LGALS9/MIR146A/MIR21/MIR29C/MMP12/MMP14/MMP2/MUC1/PIK3R1/PLG/PLXNA2/PPARA/PRKCD/PTEN/PTK2/PTPN11/PTPRC/RHOA/SC…	85
GO:0043434	BP	GO:0043434	response to peptide hormone	85/754	427/18614	2.41308e-35	8.18983e-34	2.90801e-34	ADIPOQ/ADM/AGT/AGTR1/AGTR2/AKT1/AKT2/ANXA1/APC/AREG/ARG1/BCAR1/BMP7/BSG/CA2/CAT/CAV1/CCN2/CFLAR/COL1A1/COL3A1/CREB1/CTSD/CTSK/CXCL12/CYBB/EDN1/EDNRA/EGR1/EREG/FOS/GDF15/GPT/GSK3A/GSK3B/HDAC9/IGF1R/IGF2/IGFBP1/IGFBP5/IL10/IL1B/INS/ITGB3/JAK2/JAK3/KL/LEP/MAPK1/MAPK14/MAPK3/MIR145/MTOR/MZB1/NFE2L2/NFKB1/PARP1/PIK3R1/PLA2G1B/PLAT/PPARA/PPARG/PRKCD/PTGS2/PTK2/PTPN11/RELA/ROCK1/SIRT1/SLC2A1/SOCS1/SOCS3…	85
GO:0002764	BP	GO:0002764	immune response-regulating signaling pathway	85/754	450/18614	1.45727e-33	4.4594e-32	1.58342e-32	ABL1/AIM2/BAX/BCAR1/BCL2/BTK/C5AR1/CASP1/CAV1/CCR7/CD14/CD19/CD28/CD38/CD40/CD47/CD79A/CD8A/CREBBP/CTLA4/EP300/ESR1/F2RL1/FCGR1A/FCGR2B/FCGR3A/FCN1/FOXP3/FPR1/GATA3/HLA-DRB1/HMGB1/HSPA1A/IFIH1/IGHE/IRAK3/IRF1/IRF3/IRF4/IRF7/ITK/KIT/LCK/LGALS3/MAP2K6/MAP2K7/MAP3K7/MAPK1/MAPK8/MAPKAPK2/MIR146A/MIR34A/MS4A1/MYD88/NFKB1/NFKBIA/NLRC4/NLRP1/NLRP3/NOD2/PIK3CD/PRKCD/PTK2/PTPRC/PYCARD/RELA/RIPK2/SRC/THY1/…	85
GO:0071222	BP	GO:0071222	cellular response to lipopolysaccharide	84/754	224/18614	8.05949e-59	1.13497e-56	4.03e-57	ABL1/AICDA/AKT1/ARG1/AXL/CAMP/CASP1/CCL2/CCL3/CCL5/CCR5/CD14/CD274/CD68/CD80/CD86/CEBPB/CSF2/CSF3/CX3CL1/CX3CR1/CXCL1/CXCL10/CXCL11/CXCL13/CXCL2/CXCL3/CXCL5/CXCL6/CXCL8/CXCL9/EFNB2/EPHB2/HMGB1/IL10/IL12B/IL18/IL1A/IL1B/IL24/IL37/IL6/IRF3/IRF8/JAK2/MAP2K7/MAPK1/MAPK14/MAPK3/MAPK8/MIF/MIR146A/MIR21/MRC1/MYD88/NFKB1/NFKBIA/NLRP3/NOD2/NOS2/NOS3/PF4/PPBP/PYCARD/RELA/RHOA/RIPK2/SERPINE1/SIRPA/SPI1/SRC/…	84
GO:0050870	BP	GO:0050870	positive regulation of T cell activation	84/754	249/18614	1.84834e-54	1.99052e-52	7.06783e-53	ABL1/ACTB/AGER/AIF1/AKT1/ANXA1/B2M/CAV1/CCL19/CCL2/CCL21/CCL5/CCR2/CCR7/CD209/CD27/CD274/CD28/CD4/CD40LG/CD47/CD5/CD80/CD86/DPP4/EFNB2/EPO/FOXO3/FOXP3/GATA3/GLI2/HLA-DRA/HLA-DRB1/HMGB1/ICOS/IFNG/IGF1/IGF2/IGFBP2/IL12B/IL15/IL18/IL1A/IL1B/IL2/IL21/IL23A/IL2RA/IL4/IL4R/IL6/IL6ST/IL7/IL7R/JAK2/JAK3/KITLG/LCK/LEF1/LEP/LGALS1/LGALS9/MIR21/NLRP3/NOD2/PTPN11/PTPRC/PYCARD/RHOA/RIPK2/SHH/SIRPA/SOCS1/SRC/T…	84
GO:0036293	BP	GO:0036293	response to decreased oxygen levels	84/754	306/18614	2.03937e-46	1.228e-44	4.36034e-45	ACE/ACVRL1/ADAM17/ADIPOQ/ADM/AGER/AKT1/ANGPT2/ANGPT4/ATF4/BCL2/BECN1/BMP2/BMP7/CASP3/CAT/CAV1/CCN2/CD34/CD38/CFLAR/CREBBP/CXCL12/CXCR4/CYBB/DPP4/EDN1/EDNRA/EGR1/EP300/EPO/FOS/GATA6/HIF1A/HMOX1/IL1A/KCNMB1/LEP/LOXL2/MALAT1/MDM2/MECP2/MIR126/MIR145/MIR146A/MIR21/MIR34A/MMP14/MMP2/MTOR/MYC/NFE2L2/NOS2/PDGFA/PINK1/PLAT/PLAU/PPARA/PPARG/PTGS2/PTK2B/RHOA/SIRT1/SLC2A1/SMAD3/SMAD4/SOD2/SOD3/SRC/SRF/TERC/…	84
GO:0033002	BP	GO:0033002	muscle cell proliferation	83/754	249/18614	2.47033e-53	2.47033e-51	8.77151e-52	ABL1/ACE2/ADIPOQ/AGT/AIF1/AKT1/ANGPT1/APOE/BMP2/BMP4/BMPR2/CCL5/CCN4/CDKN1A/CFLAR/CTNNB1/CX3CL1/DDIT3/EDN1/ELANE/ELN/EREG/ERN1/FGF2/FGF9/FGFR2/FOS/GATA6/GLI1/GNA13/HBEGF/HGF/HMOX1/IFNG/IGF1/IGF1R/IGFBP3/IGFBP5/IL10/IL12B/IL13/IL15/IL18/IL6/IL6R/ITGB3/JAK2/JUN/MAPK14/MIR145/MIR146A/MIR21/MIR34A/MMP2/MMP9/MYD88/NOS3/NOX1/PDGFB/PDGFRB/PPARG/PPARGC1A/PTEN/PTGS2/RHOA/S1PR1/S1PR2/SHH/SMAD1/SOD2/SRC/STA…	83
GO:0062023	CC	GO:0062023	collagen-containing extracellular matrix	83/756	415/19518	4.74654e-36	1.08933e-33	7.74435e-34	A2M/ACTA2/ADIPOQ/AGT/ANGPT1/ANGPT2/ANGPT4/ANGPTL3/ANXA1/ANXA5/APCS/APOA1/APOE/BGN/BMP7/C1QA/CCN2/CDH2/CMA1/COL1A1/COL1A2/COL3A1/CTSB/CTSD/CTSL/CXCL12/ELANE/ELN/F2/F3/FCN1/FGB/FGF10/FGFR2/FN1/GDF15/GREM1/HSP90AA1/ICAM1/IFNA2/IL7/LGALS1/LGALS3/LGALS9/LOX/LOXL2/LTBP1/MFGE8/MMP2/MMP28/MMP8/MMP9/MMRN1/NCAM1/PDGFB/PF4/PLG/POSTN/PRTN3/S100A4/S100A8/S100A9/SDC2/SEMA7A/SERPINA1/SERPINE1/SERPINH1/SHH/SOD3/…	83
GO:0071900	BP	GO:0071900	regulation of protein serine/threonine kinase activity	82/754	369/18614	8.25196e-38	3.25429e-36	1.15552e-36	ABL1/ACTB/ADAM17/ADIPOQ/AGER/AGT/AKT1/APC/APOE/AXIN1/BMP2/BMP4/BMP7/CASP3/CAV1/CCL19/CCND1/CD40/CDKN1A/CDKN2A/CEBPA/CSF1R/DKK1/DUSP1/EDN1/EGF/EGFR/ELANE/ERBB2/ERN1/FGF1/FGF2/FGFR1/FLT1/FLT3/HMGA2/IFNG/IL1B/IRAK3/KIT/KITLG/LRP5/MAP2K1/MAP2K6/MAP2K7/MAP3K7/MIF/MIR34A/NOD2/NOX4/NUP62/P2RX7/PDGFA/PDGFB/PDGFRB/PIK3CG/PLA2G1B/PPARG/PRKCD/PTEN/PTK2B/PTPRC/PYCARD/RHOA/S100A12/SIRT1/SMPD1/SNCA/SRC/TGFA/TG…	82
GO:0045088	BP	GO:0045088	regulation of innate immune response	82/754	373/18614	1.92992e-37	7.50524e-36	2.66493e-36	A2M/ADAR/AIM2/APOE/ARG1/ATG5/BTK/CASP1/CASP8/CAV1/CCL5/CD14/CD40/CREBBP/EP300/EREG/ESR1/F2RL1/FCGR2B/FCN1/HMGB1/HSP90AA1/HSPA1A/IFIH1/IFNB1/IL12B/IL21/INS/IRAK3/IRF1/IRF3/IRF4/IRF7/ISG15/KLRB1/LAMP1/LEP/LGALS9/MAP2K6/MAP3K7/MAPKAPK2/MAVS/MIR146A/MIR21/MMP12/MYD88/NFE2L2/NFKBIA/NLRC4/NLRP1/NLRP3/NOD2/PARP1/PARP9/PPARG/PTPN11/PYCARD/RELA/RIPK2/SPI1/SRC/STAT2/STING1/TBK1/TGFB1/TICAM1/TLR2/TLR3/TLR4/…	82
GO:0052547	BP	GO:0052547	regulation of peptidase activity	82/754	425/18614	4.43124e-33	1.31994e-31	4.68679e-32	A2M/ADORA2A/AGER/AIM2/AKT1/APP/BAX/BBC3/BID/CASP1/CASP8/CASP9/CAV1/CCN2/CD27/CD44/CLDN4/CST3/CTSB/CTSD/CTSK/CTSL/CYCS/EIF2AK3/F2R/F3/FAS/FASLG/FURIN/GAPDH/HGF/HMGB1/IL9/JAK2/KLF4/LAMP3/LCK/LGALS9/LGMN/LRP1/LXN/MIR21/MIR29B1/MIR29C/MMP9/MYC/NGF/NLRC4/NLRP1/NLRP3/PINK1/PLAUR/PPARG/PTGS2/PYCARD/RENBP/RHOA/RIPK2/S100A8/S100A9/SERPINA1/SERPINE1/SERPINH1/SIRT1/SMAD3/SNCA/SOX2/SRC/STAT3/THBS1/TIMP1/TIMP…	82
GO:0001666	BP	GO:0001666	response to hypoxia	81/754	293/18614	5.09306e-45	2.85211e-43	1.01271e-43	ACE/ACVRL1/ADAM17/ADIPOQ/ADM/AGER/ANGPT2/ANGPT4/BCL2/BECN1/BMP2/BMP7/CASP3/CAT/CAV1/CD34/CD38/CFLAR/CREBBP/CXCL12/CXCR4/CYBB/DPP4/EDN1/EDNRA/EGR1/EP300/EPO/FOS/GATA6/HIF1A/HMOX1/IL1A/KCNMB1/LEP/LOXL2/MALAT1/MDM2/MECP2/MIR126/MIR145/MIR146A/MIR21/MIR34A/MMP14/MMP2/MTOR/MYC/NFE2L2/NOS2/PDGFA/PINK1/PLAT/PLAU/PPARA/PPARG/PTGS2/PTK2B/RHOA/SIRT1/SLC2A1/SMAD3/SMAD4/SOD2/SOD3/SRC/SRF/TERC/TERT/TFRC/TGFB2…	81
GO:1901214	BP	GO:1901214	regulation of neuron death	81/754	327/18614	4.27785e-41	1.91648e-39	6.80494e-40	ABL1/ADORA2A/AKT1/ANGPT1/APOE/ATF4/AXL/BAX/BCL2/BCL2L1/C1QA/CASP3/CASP8/CASP9/CCL2/CCL3/CCL5/CCND1/CD34/CEBPB/CSF1/CSF3/CTNNB1/CX3CL1/CX3CR1/DDIT3/DKK1/EFNB2/EGR1/EPO/F2R/FASLG/FCGR2B/FOS/FOXO3/GATA3/GSK3A/GSK3B/HIF1A/HMOX1/IFNG/IL10/IL13/IL6ST/ITGA1/ITGAM/ITGB2/JAK2/JUN/KDR/KRAS/LGMN/MAP2K7/MCL1/MECP2/MIR200C/NGF/NR3C1/PARP1/PINK1/PPARA/PPARGC1A/PTK2B/RHOA/ROCK1/SIRT1/SNCA/SOD1/SOD2/TBK1/TERT/TG…	81
GO:0031667	BP	GO:0031667	response to nutrient levels	81/754	477/18614	1.18087e-28	2.59328e-27	9.20809e-28	A2M/ACE/ADIPOQ/ADM/AKT1/ALB/APOE/ARG1/ATF3/ATF4/ATG5/ATN1/BAX/BCL2/BECN1/BMP7/BMPR2/CAT/CCND1/CD68/CDKN1A/COL1A1/CTSK/CXCL10/CYBB/DDIT3/EIF2AK3/EPO/FAS/FOLR2/FOS/FOXO3/GDF15/GPT/HMOX1/HSPA5/IGF1R/IGFBP2/IL15/IL1A/KL/KRT20/LEP/MAP1LC3A/MAP1LC3B/MAPK1/MAPK14/MAPK3/MAPK8/MBD2/MPO/MTOR/NFE2L2/NOD2/PDX1/POSTN/PPARA/PPARG/PPARGC1A/PRKAA2/PTGS2/PTH/RXRA/SIRT1/SLC2A1/SNAI2/SOD1/SOD2/SPP1/SRC/SRF/STAT1/TF…	81
GO:0070374	BP	GO:0070374	positive regulation of ERK1 and ERK2 cascade	80/754	222/18614	1.94677e-54	2.05697e-52	7.30378e-53	ABL1/ACTA2/AGER/ANGPT1/APOE/APP/BMP2/BMP4/C5AR1/CCL1/CCL11/CCL13/CCL17/CCL18/CCL19/CCL2/CCL20/CCL21/CCL22/CCL24/CCL26/CCL3/CCL4/CCL5/CCL7/CCL8/CCN2/CCR1/CCR7/CD4/CD44/CFLAR/CHI3L1/CSF1R/CX3CL1/CXCL17/EGFR/EPO/F2R/F2RL1/FGB/FGF1/FGF10/FGF2/FGFR2/HLA-DRB1/HMGB1/ICAM1/IGF1/IL1A/ITGB3/JUN/KDR/LGALS9/MAP2K1/MAP2K7/MAPK3/MARCO/MIF/MIR126/MIR21/NOD2/NOX4/PDGFA/PDGFB/PDGFRA/PDGFRB/PTK2B/PTPN11/PTPRC/PYCA…	80
GO:0050920	BP	GO:0050920	regulation of chemotaxis	80/754	230/18614	4.73619e-53	4.6531e-51	1.6522e-51	ADAM10/ADAM17/AGER/AIF1/ANGPT2/BMPR2/C5AR1/CCL1/CCL19/CCL2/CCL21/CCL26/CCL3/CCL4/CCL5/CCL7/CCR1/CCR2/CCR4/CCR6/CCR7/CSF1/CSF1R/CX3CR1/CXCL10/CXCL12/CXCL13/CXCL17/CXCL8/CXCR2/CXCR4/DPP4/DUSP1/EDN1/EFNB2/ELANE/F2RL1/F3/FGF1/FGF10/FGF2/FGFR1/GREM1/HMGB1/HSPB1/IL23A/IL4/IL6/IL6R/KDR/LGALS9/LGMN/LPAR1/MAPK1/MAPK3/MCU/MET/MIF/MIR34A/MMP28/NOD2/PDGFB/PDGFRA/PDGFRB/PLA2G7/PTK2/PTK2B/RAC1/S1PR1/SEMA7A/SER…	80
GO:0034612	BP	GO:0034612	response to tumor necrosis factor	80/754	257/18614	8.11254e-49	5.75066e-47	2.04192e-47	ADAM10/ADAM17/ADIPOQ/AIM2/AKT1/APOA1/CALCA/CAMP/CASP1/CASP3/CASP8/CCL1/CCL11/CCL13/CCL17/CCL18/CCL19/CCL2/CCL20/CCL21/CCL22/CCL24/CCL26/CCL3/CCL4/CCL5/CCL7/CCL8/CD14/CD40/CEBPA/CHI3L1/CHUK/COL1A1/CTSK/CX3CL1/CXCL16/CXCL8/EDN1/F2RL1/FABP4/FAS/FOS/FOXO3/GATA3/HAS2/HSPA1A/JAK2/KRT8/MAP2K7/MAPK1/MAPK14/MAPK3/MIR34A/NFATC1/NFE2L2/NFKB1/NFKBIA/PTGS2/PTK2B/PYCARD/RELA/SELE/SIRT1/SMPD1/SPHK1/STAT1/THBS1/…	80
GO:0002757	BP	GO:0002757	immune response-activating signaling pathway	80/754	423/18614	1.19767e-31	3.2245e-30	1.14494e-30	ABL1/AIM2/BAX/BCAR1/BCL2/BTK/C5AR1/CASP1/CAV1/CCR7/CD14/CD19/CD28/CD38/CD40/CD47/CD79A/CD8A/CREBBP/CTLA4/EP300/ESR1/F2RL1/FCGR2B/FCN1/FOXP3/FPR1/GATA3/HLA-DRB1/HMGB1/HSPA1A/IFIH1/IGHE/IRAK3/IRF1/IRF3/IRF4/IRF7/ITK/LCK/LGALS3/MAP2K6/MAP3K7/MAPK1/MAPKAPK2/MIR146A/MIR34A/MS4A1/MYD88/NFKB1/NFKBIA/NLRC4/NLRP1/NLRP3/NOD2/PIK3CD/PRKCD/PTK2/PTPRC/PYCARD/RELA/RIPK2/SRC/THY1/TICAM1/TLR2/TLR3/TLR4/TLR5/TLR7…	80
GO:0002699	BP	GO:0002699	positive regulation of immune effector process	79/754	267/18614	2.37468e-46	1.4147e-44	5.02325e-45	ADORA2B/ANXA1/ARG1/B2M/BTK/C3/CCL19/CCR2/CD1A/CD1C/CD28/CD40/CD80/CD86/ENPP3/EPHB2/F2RL1/FCER2/FCGR1A/FCN1/FOXP3/GATA3/HLA-DRA/HLA-DRB1/HMOX1/IFNG/IL10/IL12B/IL13/IL13RA2/IL17A/IL17F/IL18/IL1B/IL1R1/IL2/IL21/IL23A/IL33/IL4/IL4R/IL5/IL6/ITGAM/ITGB2/KIT/LAMP1/LGALS9/MAP3K7/MAPKAPK2/MAVS/MIF/MIR21/MYD88/MZB1/NLRP3/NOD2/NOS2/P2RX7/PTPRC/PYCARD/RIPK2/SEMA7A/SIRT1/SPI1/STAT6/TBX21/TFRC/TGFB1/TICAM1/TLR…	79
GO:0002274	BP	GO:0002274	myeloid leukocyte activation	78/754	240/18614	3.47469e-49	2.59444e-47	9.2122e-48	ADAM10/ADORA2B/AGER/AIF1/ANXA1/APP/BTK/C1QA/C5AR1/CAMP/CCL3/CCL5/CCR2/CD2/CEBPA/CSF1/CSF2/CX3CL1/CX3CR1/CXCL6/CXCL8/CXCR2/ENPP3/F2RL1/FCGR2B/FCGR3A/FN1/GRP/HMGB1/HMOX1/IFNG/IL10/IL13/IL13RA2/IL15/IL18/IL1RL1/IL33/IL4/IL4R/IL6/IRF4/ITGAM/ITGB2/ITGB6/JAK2/JUN/KIT/LGALS9/LTBR/MIF/MIR145/MMP8/MYD88/PIK3CD/PIK3CG/PLA2G4A/PRKCD/PTGDS/PTPRC/PYCARD/S100A12/SNCA/SPHK1/SPI1/TGFBR2/THBS1/TICAM1/TLR2/TLR3/TL…	78
GO:0016032	BP	GO:0016032	viral process	78/754	426/18614	7.09301e-30	1.67599e-28	5.95101e-29	ACE2/ADAR/AGTR1/AICDA/ANPEP/APCS/APOE/ATG5/AXL/BCL2/BCL2L1/BECN1/BSG/CAV1/CCL1/CCL2/CCL3/CCL4/CCL5/CCL8/CCR5/CD209/CD28/CD4/CD80/CD86/CSF1R/CTSB/CTSL/CXCL8/CXCR4/DPP4/EFNB2/EGFR/EP300/FCN1/FURIN/GSK3A/GSK3B/HLA-DRB1/HMGA2/HMGB1/HSPA1A/ICAM1/IFI27/IFIH1/IFNA2/IFNB1/IRF7/ISG15/ITGAV/ITGB1/ITGB3/ITGB6/JUN/LAMP1/LAMP3/LEF1/LGALS1/LGALS9/MAVS/MRC1/MX1/NCAM1/PARP9/PPARA/PTX3/SIGLEC1/SMPD1/SSB/STAT1/TFR…	78
GO:0002573	BP	GO:0002573	myeloid leukocyte differentiation	77/754	227/18614	3.92447e-50	3.05236e-48	1.08382e-48	ADIPOQ/APCS/APP/BMP2/BMP4/CASP8/CCL19/CCL3/CCN4/CCR1/CCR7/CD4/CDC42/CEBPA/CEBPB/CREB1/CSF1/CSF1R/CSF2/CSF3/CTNNB1/F2RL1/FASN/FOS/GATA3/HLA-DRB1/IFNG/IL12B/IL15/IL17A/IL1RL1/IL23A/IL25/IL33/IL4/IL5/IRF4/IRF7/ITGB6/JUN/JUNB/KIT/KITLG/LEF1/LIF/LTBR/MAFB/MAPK14/MIR145/MMP9/MTOR/MYC/NR3C1/PARP1/PF4/PIK3CD/PIK3R1/PPARG/PRTN3/SIRT1/SOCS1/SPI1/SRC/TCIRG1/TF/TFRC/TGFB1/TGFBR2/TLR2/TLR3/TLR4/TNF/TNFSF11/TR…	77
GO:0010632	BP	GO:0010632	regulation of epithelial cell migration	77/754	295/18614	7.68144e-41	3.41397e-39	1.21222e-39	ABL1/ACVRL1/ADAM17/AGT/AGTR2/AKT1/ANGPT1/ANGPT2/ANGPT4/ANXA1/APOE/BCAR1/BMP4/BMPR2/CD40/CXCL13/EDN1/EGF/ENPP2/FGF1/FGF10/FGF2/FGF7/FGFR1/FUT1/GATA3/HAS2/HBEGF/HDAC9/HIF1A/HMGB1/HMOX1/HSPB1/IFNG/IL4/ITGB3/JUN/KDR/KLF4/LGMN/MECP2/MET/MIR126/MIR146A/MIR200C/MIR21/MIR29A/MIR29C/MMP9/MTOR/NFE2L2/NOS3/PDGFB/PIK3CD/PIK3CG/PPARG/PTEN/PTGS2/PTK2/PTK2B/RAC1/RHOA/SIRT1/SOX9/SPARC/SRC/STAT5A/TEK/TGFB1/TGFB2/…	77
GO:0002440	BP	GO:0002440	production of molecular mediator of immune response	77/754	328/18614	2.63203e-37	1.01651e-35	3.60937e-36	AICDA/ANGPT1/APOA1/ARG1/ATG5/AXL/B2M/BTK/CCR2/CCR6/CD28/CD40/CD40LG/CD86/ELANE/EPHB2/F2RL1/FCGR2B/FOXP3/GATA3/HLA-DRA/HLA-DRB1/HMOX1/IFNA2/IFNB1/IL10/IL13/IL13RA2/IL17A/IL17F/IL18/IL1B/IL1R1/IL2/IL21/IL33/IL4/IL4R/IL5/IL6/IRAK3/JAK3/KIT/MAP3K7/MAPKAPK2/MAVS/MIF/MYD88/MZB1/NLRP3/NOD2/P2RX7/PTPRC/PYCARD/RIPK2/SEMA7A/SIRT1/SMAD7/STAT6/TBX21/TFRC/TGFB1/TGFB2/TGFB3/TICAM1/TLR3/TLR4/TLR7/TLR9/TNF/TNFRS…	77
GO:0051091	BP	GO:0051091	positive regulation of DNA-binding transcription factor activity	76/754	271/18614	9.53323e-43	4.64227e-41	1.64836e-41	AGER/AGT/AIM2/AKT1/ALK/APP/AR/BMP2/BTK/CAT/CAV1/CD40/CD40LG/CFLAR/CHUK/CSF3/CTNNB1/CX3CL1/CX3CR1/DDIT3/EDN1/EP300/ESR1/FOSL1/GREM1/HSPA1A/IL10/IL18/IL1B/IL5/IL6/INS/IRAK3/JAK2/KIT/LGALS9/LRP5/MAP3K7/MAVS/MYD88/NLRC4/NLRP3/NOD2/PINK1/PLA2G1B/PPARG/PPARGC1A/PTEN/PYCARD/RELA/RIPK2/RIPK3/S100A12/S100A8/S100A9/SHH/SMAD3/SPHK1/SRF/STAT3/STING1/TFRC/TICAM1/TLR2/TLR3/TLR4/TLR9/TNF/TNFSF11/TRAF6/TRIM21/TR…	76
GO:0007249	BP	GO:0007249	I-kappaB kinase/NF-kappaB signaling	76/754	293/18614	4.17637e-40	1.78532e-38	6.33923e-39	ABL1/ADIPOQ/AKT1/ANGPT1/BTK/CASP1/CASP8/CCL19/CCL21/CCR7/CD4/CD40/CFLAR/CHUK/CTNNB1/CX3CL1/CX3CR1/EDN1/EDNRA/ESR1/F2R/F2RL1/FASLG/GAPDH/HLA-DRB1/HMOX1/HSPB1/IL1A/IL1B/IRF3/LGALS1/LGALS9/LPAR1/LTBR/MAP3K7/MAVS/MYD88/NFKB1/NFKBIA/NOD2/NUP62/PINK1/PYCARD/RELA/RHOA/RIPK2/RIPK3/ROCK1/S100A12/S100A4/S100B/SIRPA/SIRT1/SQSTM1/STAT1/TBK1/TFRC/TICAM1/TLR2/TLR3/TLR4/TLR7/TLR8/TLR9/TNF/TNFAIP3/TNFRSF10B/TNFR…	76
GO:0044403	BP	GO:0044403	biological process involved in symbiotic interaction	76/754	313/18614	6.35026e-38	2.57692e-36	9.15e-37	ACE2/AGTR1/ANPEP/APCS/APOE/ARG1/AXL/BCL2L1/BECN1/BSG/CAMP/CAV1/CCL3/CCL4/CCL5/CCL8/CCR5/CD209/CD4/CD80/CD86/CDC42/CFHR1/CSF1R/CTSB/CTSL/CX3CR1/CXCL6/CXCL8/CXCR4/DPP4/EFNB2/EGFR/ELANE/EP300/F2/F2RL1/FASN/FCN1/FN1/FURIN/GAPDH/HLA-DRB1/HMGA2/HMGB1/HSPA1A/ICAM1/IFI27/IFNA2/ITGAV/ITGB1/ITGB3/ITGB6/JAK2/JUN/LAMP1/LEF1/LGALS1/LGALS9/MRC1/MYD88/NCAM1/PF4/PLG/PTX3/SFTPD/SIGLEC1/SMPD1/SPRR2A/SRC/TFRC/TMPRS…	76
GO:0051098	BP	GO:0051098	regulation of binding	76/754	369/18614	1.09048e-32	3.21403e-31	1.14122e-31	ABL1/ACE/ACTB/ADIPOQ/AGER/AKT1/ANGPT1/APOE/APP/B2M/BAX/BMP2/BMP4/CAV1/CDC42/CDKN1A/CFHR1/CSF3/CTNNB1/DDIT3/DKK1/EGF/EP300/GATA3/GSK3B/HMGA2/HMGB1/HMOX1/IFNG/IGF1/IL10/IRF4/JAK2/JUN/KLF4/LEF1/LIF/LOX/LRP1/MAPK3/MAPK8/MBD2/MET/MMP8/MMP9/NFKBIA/NGF/PARP1/PARP9/PDGFB/PDX1/PLAUR/PPARA/PPARG/PRKCD/RIPK2/ROCK1/SMAD2/SMAD3/SMAD4/SRC/STING1/TERT/TGFB1/TGFBR1/TICAM1/TNFSF11/TRAF6/TRIM21/TWIST1/TXN/UBASH3B/…	76
GO:0050731	BP	GO:0050731	positive regulation of peptidyl-tyrosine phosphorylation	75/754	181/18614	2.4197e-56	2.76537e-54	9.81914e-55	ABL1/ACE/ADAM17/ADIPOQ/AGT/ANGPT1/ANGPT4/AREG/CCL5/CD4/CD40/CD44/CD80/CSF1R/CSF2/CSF3/EGF/ENPP2/EPO/EREG/FCGR1A/FGF10/FGF7/FLT3/GREM1/HBEGF/HGF/IFNA2/IFNG/IGF1/IGF2/IL11/IL12B/IL13/IL15/IL18/IL2/IL21/IL23A/IL24/IL3/IL4/IL5/IL6/IL6R/IL6ST/ITGB3/JAK2/KIT/KITLG/LEP/LIF/MIF/MTOR/NOD2/NOX4/OSM/PARP9/PDGFB/PECAM1/PTK2B/PTPN11/PTPRC/RIPK2/SRC/TGFA/TGFB1/TNF/TNFRSF1A/TP53/TREM2/TSLP/VEGFA/VTN/WNT3A	75
GO:0043542	BP	GO:0043542	endothelial cell migration	75/754	283/18614	2.70832e-40	1.17571e-38	4.17464e-39	ABL1/ACVRL1/ADAM17/AGT/AGTR2/AKT1/ANGPT1/ANGPT2/ANGPT4/ANXA1/APOA1/APOE/BCAR1/BMP4/BMPR2/CD40/CDH5/CXCL13/DPP4/EDN1/EFNB2/EGF/FAP/FGF1/FGF2/FGFR1/FUT1/GATA3/GREM1/HDAC9/HIF1A/HMGB1/HMOX1/HSPB1/ITGB1/ITGB3/KDR/KLF4/LGMN/LOXL2/MECP2/MET/MIR126/MIR146A/MIR200C/MIR21/MIR29A/MIR29C/NFE2L2/NOS3/PDGFB/PIK3CD/PIK3CG/PPARG/PTGS2/PTK2/PTK2B/RAC1/RHOA/S100A12/S100A9/SIRT1/SNAI2/SPARC/SRF/STAT5A/TEK/TGFB1/TG…	75
GO:0042692	BP	GO:0042692	muscle cell differentiation	75/754	410/18614	1.01483e-28	2.25518e-27	8.0076e-28	ACTA1/ADM/AGT/AKT1/ATG5/BCL2/BMP2/BMP4/BMPR2/CASP3/CD9/CDH2/CFLAR/CTNNB1/CXCL10/CXCL9/DKK1/DNER/EDN1/EDNRA/EFNB2/ENG/EREG/FGF10/FGF9/FGFR2/GATA6/GDF15/GREM1/GSK3A/HDAC9/IGF1/IGF2/IGFBP5/IL4/IL4R/ITGB1/KDM6B/KIT/KRAS/KRT19/KRT8/LOX/MAPK14/MDM2/MECP2/MIR145/MIR21/MIR34A/MMP14/MRTFA/MTOR/NFATC1/NOX4/PDGFB/PDGFRA/PDGFRB/PPARA/SDC1/SHH/SIRT1/SMAD1/SMAD4/SOD2/SOX9/SRF/TGFB1/TNFSF14/VEGFA/WNT1/WNT3A/XBP…	75
GO:0009410	BP	GO:0009410	response to xenobiotic stimulus	75/754	440/18614	1.11311e-26	2.15689e-25	7.65858e-26	ABCA3/ABL1/ACE/ADAM17/ADIPOQ/ADORA2A/AHR/AIM2/ARG1/ATG5/BCL2/BECN1/CASP3/CAT/CCND1/CD38/CD69/CDH1/COL1A1/CREB1/CTNNB1/CXCR4/CYBB/DUSP6/EDN1/ENG/FOS/FOSL1/FZD3/GATA3/GATA6/HMOX1/HSP90AA1/HSPA5/IGFBP2/IL10/IL1B/ITGB3/JUN/LCK/LOX/MAP2K6/MIR326/MMP2/MYC/NFE2L2/NOS2/P2RX7/PDE4A/PDGFA/PDX1/PRKAA2/PTGS2/PTH/PTK2B/REN/RHOA/RORC/S100A12/SCGB1A1/SMPD1/SNCA/SOD1/SOD2/SRC/STAT1/TFRC/TGFA/TGFB2/TGFBR2/THBS1/T…	75
GO:0042113	BP	GO:0042113	B cell activation	74/754	276/18614	3.8277e-40	1.64886e-38	5.85468e-39	ABL1/ADAM17/AHR/AICDA/BAX/BCL2/BTK/CASP3/CASP8/CCR6/CD19/CD27/CD28/CD38/CD40/CD40LG/CD79A/CD86/CDKN1A/CTLA4/CXCR5/EP300/EPHB2/FCGR2B/FLT3/FOXJ1/FOXP3/HDAC9/IFNA1/IFNA2/IFNB1/IL10/IL11/IL13/IL2/IL21/IL4/IL5/IL6/IL7/IL7R/IL9/IRF8/ITGB1/JAK3/KIT/LEF1/LGALS1/MIF/MMP14/MS4A1/MZB1/NOD2/PIK3CD/PIK3R1/PRKCD/PTK2B/PTPRC/SPI1/STAT6/TBX21/TCIRG1/TFRC/TGFB1/TICAM1/TLR4/TLR9/TNFAIP3/TNFSF13B/TP53/VCAM1/WNT3A/…	74
GO:0034599	BP	GO:0034599	cellular response to oxidative stress	74/754	290/18614	1.57149e-38	6.51875e-37	2.31465e-37	ABL1/AIF1/AKT1/ALOX5/ANXA1/ARG1/ATF4/AXL/BCL2/BECN1/BMP7/BTK/CAT/CHUK/CTNNB1/EDN1/EDNRA/EGFR/ERN1/FOS/FOXO3/HGF/HIF1A/HMOX1/HSPA1A/HSPB1/IL10/IL6/INS/JAK2/JUN/KDM6B/KEAP1/MAP1LC3A/MAPK1/MAPK3/MAPK8/MCL1/MET/MIR21/MIR29B1/MIR34A/MMP2/MMP3/MMP9/MPO/NFE2L2/NOS3/NOX1/PARP1/PDGFRA/PINK1/PPARGC1A/PRKAA2/PRKCD/RELA/RIPK3/SIRPA/SIRT1/SNCA/SOD1/SOD2/SOD3/SPHK1/SRC/STAT6/TLR4/TNF/TNFAIP3/TP53/TREM2/TXN/WNT…	74
GO:0071496	BP	GO:0071496	cellular response to external stimulus	74/754	327/18614	1.00805e-34	3.26305e-33	1.15863e-33	ADORA2B/AGT/AIF1/ALB/ATF3/ATF4/ATG5/AXL/BCL2/BECN1/BMPR2/CASP1/CASP8/CD40/CD68/CDKN1A/COL1A1/CTSK/EIF2AK3/ENG/FAS/FGF2/FOLR2/FOS/FOSL1/FOXO3/GSDMD/HMOX1/HSPA5/IGF1R/IL13/IL15/IL1B/IL33/IRF1/ITGB3/KRT20/LEP/LTBR/MAP1LC3A/MAP1LC3B/MAPK1/MAPK3/MAPK8/MTOR/MYD88/NFE2L2/NFKB1/P2RX7/POSTN/PPARA/PRKAA2/PTGS2/PTPRC/RXRA/SIRT1/SLC2A1/SNAI2/SOX9/SRF/TFEB/TLR3/TLR4/TLR5/TLR7/TLR8/TNFRSF10B/TNFRSF1A/TNFRSF8/T…	74
GO:1901653	BP	GO:1901653	cellular response to peptide	74/754	375/18614	1.45471e-30	3.63677e-29	1.29133e-29	ADIPOQ/AGER/AGT/AGTR1/AGTR2/AKT1/AKT2/APC/APP/ARG1/BCAR1/CA2/CAV1/CFLAR/CTSD/EDN1/EDNRA/EPHB2/FCGR2B/FOS/GDF15/GPT/GSK3A/GSK3B/HDAC9/ICAM1/IGF1/IGF1R/IGF2/IGFBP1/IL1B/INS/ITGB3/JAK2/JAK3/LEP/LGMN/LRP1/MAPK1/MAPK3/MDM2/MIR145/MIR146A/MZB1/NFE2L2/NFKB1/NOD2/PARP1/PIK3R1/PLA2G1B/PLAT/PPARG/PRKCD/PTK2/PTPN11/RELA/RIPK2/ROCK1/SIRT1/SOCS1/SOCS3/SRC/STAT1/STAT3/STAT5A/STAT6/TLR4/TNF/TP53/TREM2/VCAM1/VIM…	74
GO:0070665	BP	GO:0070665	positive regulation of leukocyte proliferation	73/754	166/18614	3.92231e-57	4.6625e-55	1.65554e-55	AGER/AIF1/ANXA1/BCL2/BCL2L1/BTK/CCL19/CCL5/CCR2/CD209/CD274/CD28/CD38/CD40/CD40LG/CD80/CD86/CDKN1A/CSF1/CSF1R/CSF2/CSF2RB/EPHB2/EPO/FCGR3A/FGF10/FOXP3/HMGB1/IGF1/IGF2/IGFBP2/IL12B/IL13/IL15/IL18/IL1A/IL1B/IL2/IL21/IL23A/IL2RA/IL4/IL5/IL6/IL6ST/IL7/JAK2/JAK3/KIT/KITLG/LEP/LGALS9/MAPK1/MAPK3/MIF/MIR21/MYD88/PTH/PTK2/PTPRC/PYCARD/RIPK2/SHH/TFRC/TGFBR2/TICAM1/TLR4/TLR9/TNFSF13B/TRAF6/TYK2/VCAM1/WNT3A	73
GO:0097191	BP	GO:0097191	extrinsic apoptotic signaling pathway	73/754	227/18614	1.0949e-45	6.32107e-44	2.24446e-44	AGT/AGTR2/AKT1/AR/ATF3/BAX/BCL2/BCL2A1/BCL2L1/BID/BMP4/CASP8/CAV1/CD27/CFLAR/CSF2/CX3CL1/FAS/FASLG/FGB/FGF10/FGFR1/GSK3A/GSK3B/HGF/HMOX1/HSPA1A/ICAM1/IFI27/IFNG/IGF1/IL1A/IL1B/IL2/IL33/IL4/IL6R/IL7/ITGAV/JAK2/KITLG/KRT8/LGALS3/LTBR/MCL1/NGF/NOS3/P2RX7/PF4/PIK3R1/PTEN/PTPRC/PYCARD/RELA/SERPINE1/SMAD3/SNAI2/SPI1/SRC/TERT/TGFB1/TGFB2/TGFBR1/THBS1/TIMP3/TLR3/TNF/TNFAIP3/TNFRSF10B/TNFRSF1A/TNFRSF1B/TN…	73
GO:0050878	BP	GO:0050878	regulation of body fluid levels	73/754	361/18614	7.07549e-31	1.79288e-29	6.36609e-30	ACTB/ADM/ADORA2A/ANXA5/APOE/AQP5/ATG5/AXL/CAV1/CCND1/CD34/CD40/CD40LG/CD9/CFTR/COL3A1/CREB1/EDN1/EPHB2/F10/F2/F2R/F2RL1/F3/FAP/FGB/FGF10/FLI1/GNA13/HAS2/HIF1A/HPS4/HSPB1/IL6/IL6ST/ITGB3/JAK2/LCK/MAPK14/MERTK/MMRN1/NFE2L2/NOS3/NPPB/PDGFA/PDGFB/PDGFRA/PDPN/PF4/PIK3CG/PLA2G4A/PLAT/PLAU/PLAUR/PLG/PRKCD/SELP/SERPINA1/SERPINE1/SHH/SRC/SRF/STAT5A/THBD/THBS1/TLR4/TXK/UBASH3B/VEGFA/VTN/VWF/WNT3A/XBP1	73
GO:0060537	BP	GO:0060537	muscle tissue development	73/754	426/18614	3.9192e-26	7.36493e-25	2.6151e-25	ABL1/ACTA1/AGT/ATF3/ATG5/BCL2/BMP2/BMP4/BMP7/CAV1/CDC42/CFLAR/COL3A1/CREB1/CTNNB1/DKK1/DNER/EDN1/EDNRA/EFNB2/EGR1/ELN/ENG/EP300/FGF2/FGF9/FGFR2/FOS/GATA6/GLI1/GREM1/GSK3A/HDAC9/HLF/IGF1/IGF2/IGFBP5/ITGB1/KDM6B/KRAS/LEF1/LOX/MAPK14/MIR145/MTOR/MYH14/NOX4/NPPB/PDGFRA/PDGFRB/PPARA/PPARGC1A/RHOA/S1PR1/SHH/SMAD1/SMAD3/SMAD4/SMAD7/SOX9/SRF/TAFAZZIN/TGFB1/TGFB2/TGFBR1/TGFBR2/TWIST1/VEGFA/WNT3A/WNT5A/XK/…	73
GO:1903829	BP	GO:1903829	positive regulation of protein localization	73/754	468/18614	1.44414e-23	2.30404e-22	8.18106e-23	ADORA2A/AKT1/AKT2/APC/BBC3/CD38/CDH1/CFTR/EGF/EGFR/EIF2AK3/EPHB2/ERBB2/F2/F2RL1/FGB/GSK3A/GSK3B/GZMB/HIF1A/HLA-DRB1/HPS4/HSP90AA1/IFNG/IGF1/IL13/IL1A/IL1B/INS/ITGAM/ITGB1/ITGB2/JAK2/LEP/LGALS3/LIF/LRP1/MAPK14/MAPK8/MAVS/MCU/NUP62/P2RX7/PARP1/PARP9/PDX1/PECAM1/PIK3R1/PINK1/PLA2G1B/PPARG/PRKAA2/PRKCD/PTGS2/SHH/SMAD3/SQSTM1/SRC/TERT/TFRC/TGFB1/TGFB2/TGFB3/TLR2/TLR4/TNF/TREM2/TSG101/WNT3A/WNT5A/WNT7A…	73
GO:0016049	BP	GO:0016049	cell growth	73/754	495/18614	4.41632e-22	6.49117e-21	2.30485e-21	ABL1/ACVRL1/ADAM10/ADAM17/AGT/AGTR1/AGTR2/AKT1/APOE/APP/BCAR1/BCL2/BMPR2/CD38/CDC42/CDH1/CDKN1A/CDKN2A/CTNNB1/CXCL12/CXCL16/CXCR4/EDN1/EDNRA/EGFR/ERBB2/F2/FN1/GREM1/GSK3A/GSK3B/HBEGF/HSP90AA1/HSPA1A/IGF1/IGFBP1/IGFBP3/IGFBP5/IL2/IL9/INS/ITGB1/KRT17/MMP14/MTOR/NGF/NPPB/PPARA/PTK2B/RHOA/S100A8/S100A9/SEMA7A/SIRT1/SMAD3/SMAD4/SMAD7/SOX9/SPHK1/SPP1/SRF/TGFB1/TGFB2/TGFBR1/TGFBR2/TNC/TP53/TSG101/VEGFA/…	73
GO:0002819	BP	GO:0002819	regulation of adaptive immune response	72/754	205/18614	4.11949e-48	2.81331e-46	9.98937e-47	AGER/AHR/ANXA1/ARG1/B2M/BTK/C3/CCL19/CCR2/CD1A/CD1C/CD274/CD28/CD4/CD40/CD80/EPHB2/FCER2/FCGR1A/FCGR2B/FOXJ1/FOXP3/GATA3/HLA-DRA/HLA-DRB1/HMGB1/IFNA2/IFNB1/IL10/IL12B/IL18/IL1B/IL1R1/IL1RL1/IL2/IL23A/IL27/IL33/IL4/IL4R/IL6/IL6ST/IL7R/IRF1/IRF7/JAK2/JAK3/JUNB/MAP3K7/MIR21/NLRP3/NOD2/P2RX7/PLA2G4A/PTPRC/PYCARD/RIPK2/RIPK3/SIRT1/SMAD7/STAT6/TBX21/TFRC/TGFB1/TNF/TNFAIP3/TNFRSF1B/TNFSF13B/TRAF6/TREM2/…	72
GO:0042098	BP	GO:0042098	T cell proliferation	72/754	213/18614	8.89133e-47	5.59454e-45	1.98648e-45	ABL1/AGER/AIF1/ANXA1/ARG1/BAX/BID/BMP4/CASP3/CCL19/CCL5/CCR2/CD209/CD274/CD28/CD40LG/CD80/CD86/CEBPB/CTLA4/CTNNB1/EPO/ERBB2/FOXJ1/FOXP3/HLA-DRB1/HMGB1/IDO1/IGF1/IGF2/IGFBP2/IL10/IL12B/IL15/IL18/IL1A/IL1B/IL2/IL21/IL23A/IL27/IL2RA/IL4/IL6/IL6ST/IRF1/JAK2/JAK3/KITLG/LEP/LGALS3/LGALS9/MIR21/P2RX7/PIK3CG/PTPRC/PYCARD/RIPK2/RIPK3/SCGB1A1/SDC4/SFTPD/SHH/TFRC/TGFBR2/TNFRSF1B/TNFSF13B/TNFSF14/TP53/TRAF6/…	72
GO:0071356	BP	GO:0071356	cellular response to tumor necrosis factor	72/754	235/18614	1.96201e-43	9.89844e-42	3.51469e-42	ADAM17/ADIPOQ/AIM2/AKT1/APOA1/CALCA/CAMP/CASP1/CASP8/CCL1/CCL11/CCL13/CCL17/CCL18/CCL19/CCL2/CCL20/CCL21/CCL22/CCL24/CCL26/CCL3/CCL4/CCL5/CCL7/CCL8/CD40/CEBPA/CHI3L1/CHUK/COL1A1/CTSK/CX3CL1/CXCL8/EDN1/F2RL1/FABP4/FAS/FOS/FOXO3/GATA3/HAS2/HSPA1A/JAK2/KRT8/MAPK1/MAPK14/MAPK3/MIR34A/NFATC1/NFE2L2/NFKB1/NFKBIA/PTK2B/PYCARD/RELA/SIRT1/SPHK1/STAT1/THBS1/TNF/TNFAIP3/TNFRSF1A/TNFRSF1B/TNFSF11/TNFSF13B/TP…	72
GO:0002703	BP	GO:0002703	regulation of leukocyte mediated immunity	72/754	246/18614	6.46622e-42	3.04293e-40	1.08047e-40	ADORA2B/AGER/AHR/ARG1/B2M/BTK/C3/CCR2/CD1A/CD1C/CD28/CD40/CX3CR1/CXCL6/F2RL1/FCER2/FCGR1A/FCGR2B/FOXJ1/FOXP3/GATA3/HLA-DRA/HLA-DRB1/HMGB1/HMOX1/ICAM1/IFNA2/IFNB1/IL10/IL12B/IL13/IL13RA2/IL18/IL1B/IL1R1/IL2/IL21/IL23A/IL4/IL4R/IL6/IL7R/ITGAM/ITGB2/JAK3/KIT/KLRB1/LAMP1/LEP/LGALS9/MAP3K7/MAVS/NLRP3/NOD2/NOS2/P2RX7/PTPRC/RIPK3/SMAD7/SPI1/STAT6/TBX21/TFRC/TGFB1/TICAM1/TLR3/TLR4/TLR9/TNF/TNFRSF1B/TRAF6…	72
GO:0002449	BP	GO:0002449	lymphocyte mediated immunity	72/754	300/18614	1.35883e-35	4.6972e-34	1.66786e-34	AGER/AHR/AICDA/ARG1/B2M/BTK/C1QA/C3/CCR2/CCR6/CD19/CD1A/CD1C/CD2/CD27/CD28/CD40/CD40LG/CD8A/CSF2RB/FCER2/FCGR1A/FCGR2B/FCGR3A/FOXJ1/FOXP3/GATA3/GZMB/HLA-DRA/HLA-DRB1/HMGB1/HPRT1/IFNA2/IFNB1/IL10/IL12B/IL13RA2/IL18/IL1B/IL1R1/IL2/IL21/IL23A/IL2RB/IL4/IL6/IL7R/IL9/IRF7/KLRB1/LAMP1/LEP/LGALS9/MAP3K7/MYD88/NLRP3/NOD2/P2RX7/PRKCD/PTPRC/RIPK3/SMAD7/STAT6/TBX21/TCIRG1/TFRC/TGFB1/TLR8/TNF/TNFRSF1B/TRAF6/…	72
GO:0060485	BP	GO:0060485	mesenchyme development	72/754	320/18614	1.26234e-33	3.88411e-32	1.37915e-32	ACTA1/ACTA2/ACVRL1/APC/AXIN2/BCL2/BMP2/BMP4/BMP7/BMPR2/CDC42/CDH2/COL1A1/CTNNB1/DKK1/EDN1/EDNRA/ENG/FGF10/FGF9/FGFR1/FGFR2/FN1/GATA3/GREM1/GSK3B/HAS2/HGF/HIF1A/HMGA2/IGF1/IL1B/IL6/KITLG/LEF1/LOXL2/MAPK1/MAPK3/MDM2/MIR145/MIR21/MIR29B1/MTOR/MYC/NKX2-1/NOS3/PDGFRB/PDPN/PITX2/PTEN/PTK2/ROCK1/S100A4/SEMA7A/SHH/SMAD2/SMAD3/SMAD4/SMAD7/SNAI1/SNAI2/SOX9/STAT1/TGFB1/TGFB2/TGFB3/TGFBR1/TGFBR2/TWIST1/WNT3A…	72
GO:0052548	BP	GO:0052548	regulation of endopeptidase activity	72/754	336/18614	3.63893e-32	1.00881e-30	3.58204e-31	A2M/ADORA2A/AGER/AIM2/AKT1/BAX/BBC3/BID/CASP1/CASP8/CASP9/CCN2/CD27/CD44/CST3/CTSD/CYCS/EIF2AK3/F2R/F3/FAS/FASLG/FURIN/GAPDH/HGF/HMGB1/IL9/JAK2/KLF4/LAMP3/LCK/LGALS9/LGMN/MIR21/MIR29B1/MIR29C/MMP9/MYC/NLRC4/NLRP1/NLRP3/PLAUR/PPARG/PTGS2/PYCARD/RENBP/RHOA/RIPK2/S100A8/S100A9/SERPINA1/SERPINE1/SERPINH1/SIRT1/SMAD3/SNCA/SOX2/SRC/STAT3/THBS1/TIMP1/TIMP2/TIMP3/TIMP4/TNF/TNFSF10/TNFSF14/TP63/VEGFA/VTN/…	72
GO:0010038	BP	GO:0010038	response to metal ion	72/754	367/18614	1.38203e-29	3.23822e-28	1.14981e-28	ABCB6/ACTA1/AKT1/APP/ARG1/ATF4/ATG5/B2M/BCL2/BECN1/BSG/CASP3/CASP8/CASP9/CAT/CAV1/CCND1/CD14/CDH1/CEBPA/CHUK/CREB1/CYBB/EDN1/EGFR/EIF2AK3/FABP4/FGB/FOS/GSK3A/HIF1A/HMOX1/HSPA5/IGFBP2/IL1A/JUN/JUNB/KCNMB1/KCNMB2/KIT/LGMN/LOXL2/MAP1LC3A/MAPK1/MAPK3/MAPK8/MMP9/NFE2L2/P2RX7/PARP1/PDX1/PRKAA2/PTGS2/PTH/PTK2B/S100A8/SDC1/SHH/SMPD1/SNCA/SOD1/SOD2/SOD3/SYT7/TCIRG1/TERT/TF/TFRC/THBS1/TLR9/VCAM1/WNT5A	72
GO:0040013	BP	GO:0040013	negative regulation of locomotion	72/754	427/18614	2.41329e-25	4.30396e-24	1.52823e-24	ACVRL1/ADIPOQ/ADORA2A/AGTR2/AIF1/AKT1/ANGPT2/ANGPT4/APOE/BCL2/BMP4/CCL2/CCL21/CDH1/CDH11/COL3A1/CX3CL1/CX3CR1/CXCL12/CXCL13/DPP4/DUSP1/ELANE/ENG/FGF2/FOXO3/GATA3/GNA13/GREM1/HAS1/HMGB1/HMOX1/IGFBP3/IGFBP5/IL24/IL33/IL4/KLF4/LRP1/MECP2/MIF/MIR126/MIR145/MIR146A/MIR200C/MIR21/MIR29A/MIR29B1/MIR29C/MIR34A/MMP28/NFE2L2/NKX2-1/PPARG/PTEN/RAC1/RHOA/S1PR2/SEMA7A/SERPINE1/SHH/SLURP1/SMAD7/SRF/STAT3/TGFB1…	72
GO:0048568	BP	GO:0048568	embryonic organ development	72/754	453/18614	9.42419e-24	1.52091e-22	5.40036e-23	A2M/ADM/AKT1/ATF4/BMP4/BMP7/CASP8/CDC42/CEBPA/CEBPB/CSF2/CTNNB1/CXCL8/ECE1/EDN1/EDNRA/EGFR/ENG/EPHB2/FGF10/FGF9/FGFR2/FZD3/GATA3/GLI1/GLI2/HIF1A/IGF2/IL10/IL3/JUNB/KDR/KIT/KITLG/KRT19/KRT8/LEF1/LIF/MAFB/MAP2K1/MAPK1/MAPK3/MBD2/MMP14/PDGFA/PDGFB/PDGFRA/PITX2/SHH/SMAD2/SMAD3/SNAI1/SOCS3/SOD1/SOX9/SRF/TFEB/TGFB1/TGFB2/TGFB3/TGFBR1/TGFBR2/TNF/TP53/TWIST1/VEGFA/WNT1/WNT3A/WNT5A/WNT7B/YAP1/ZEB1	72
GO:0050679	BP	GO:0050679	positive regulation of epithelial cell proliferation	71/754	225/18614	8.16474e-44	4.23357e-42	1.50323e-42	ACVRL1/ADAM17/AGTR1/AKT1/AR/AREG/ARG1/BMP2/BMP4/BMPR2/BTK/C5AR1/CCL11/CCL24/CCL26/CCND1/CCR3/CDC42/CFLAR/CTNNB1/CXCL12/EGF/EGFR/ERBB2/F3/FGF1/FGF10/FGF2/FGF7/FGF9/FGFR1/FGFR2/HAS2/HIF1A/HMGB1/HMOX1/IGF1/IGF2/IL10/ITGB3/JUN/KDR/MIR126/MIR146A/MIR21/MIR29A/MMP12/MYC/NEAT1/NOD2/PDGFB/PDX1/PIK3CD/SHH/SIRT1/SOX9/STAT3/STAT5A/TEK/TGFA/TGFBR1/TNF/TNFAIP3/TP63/TWIST1/VEGFA/WNT3A/WNT5A/WNT7A/XBP1/YAP1	71
GO:0002687	BP	GO:0002687	positive regulation of leukocyte migration	70/754	147/18614	8.0147e-58	1.04378e-55	3.70619e-56	ABL1/ADAM10/ADAM17/AGER/AIF1/APP/C5AR1/CCL1/CCL19/CCL20/CCL21/CCL24/CCL3/CCL4/CCL5/CCL7/CCR1/CCR2/CCR6/CCR7/CD47/CSF1/CSF1R/CX3CL1/CX3CR1/CXCL10/CXCL12/CXCL13/CXCL17/CXCL8/CXCR2/EDN1/F2RL1/FUT4/HMGB1/ICAM1/IL1A/IL1R1/IL23A/IL4/IL6/IL6R/ITGB3/KITLG/LGALS3/LGALS9/LGMN/LYVE1/MAPK1/MAPK3/MCU/MMP14/PIK3R1/PLA2G7/PTK2/PTK2B/PYCARD/RAC1/RHOA/SELE/SELP/SERPINE1/SPI1/THBS1/THY1/TNF/TNFSF14/TREM2/VEGFA/WNT…	70
GO:0097530	BP	GO:0097530	granulocyte migration	70/754	156/18614	1.48661e-55	1.665e-53	5.91201e-54	ANXA1/BSG/C5AR1/CCL1/CCL11/CCL13/CCL17/CCL18/CCL19/CCL2/CCL20/CCL21/CCL22/CCL24/CCL26/CCL3/CCL4/CCL5/CCL7/CCL8/CCR7/CSF1/CSF1R/CX3CL1/CXCL1/CXCL10/CXCL11/CXCL13/CXCL17/CXCL2/CXCL3/CXCL5/CXCL6/CXCL8/CXCL9/CXCR1/CXCR2/DPP4/EDN1/FUT4/IL17A/IL17RA/IL1A/IL1B/IL1R1/IL23A/IL4/ITGA1/ITGB2/LGALS3/MAPK1/MAPK3/MCU/MYD88/NOD2/PECAM1/PF4/PIK3CD/PIK3CG/PLA2G1B/PPBP/PRTN3/PTK2/RAC1/S100A12/S100A8/S100A9/TGFB2/T…	70
GO:0048659	BP	GO:0048659	smooth muscle cell proliferation	70/754	180/18614	2.49644e-50	2.0261e-48	7.19417e-49	ACE2/ADIPOQ/AGT/AIF1/AKT1/APOE/BMP2/BMP4/BMPR2/CCL5/CCN4/CDKN1A/CTNNB1/CX3CL1/DDIT3/EDN1/ELANE/ELN/EREG/ERN1/FGF2/FGF9/FGFR2/GNA13/HBEGF/HMOX1/IFNG/IGF1/IGF1R/IGFBP3/IGFBP5/IL10/IL12B/IL13/IL15/IL18/IL6/IL6R/ITGB3/JAK2/JUN/MIR145/MIR146A/MIR21/MIR34A/MMP2/MMP9/MYD88/NOS3/NOX1/PDGFB/PDGFRB/PPARG/PPARGC1A/PTEN/PTGS2/RHOA/S1PR1/S1PR2/SOD2/SRC/STAT1/TERT/TGFB1/TGFB3/TGFBR2/THBS1/TLR4/TNF/TNFAIP3	70
GO:0002700	BP	GO:0002700	regulation of production of molecular mediator of immune response	70/754	189/18614	1.29014e-48	9.03101e-47	3.20669e-47	ANGPT1/APOA1/ARG1/ATG5/AXL/B2M/BTK/CCR2/CD28/CD40/CD40LG/CD86/EPHB2/F2RL1/FCGR2B/FOXP3/GATA3/HMOX1/IFNA2/IFNB1/IL10/IL13/IL13RA2/IL17A/IL17F/IL18/IL1B/IL1R1/IL2/IL21/IL33/IL4/IL4R/IL5/IL6/IRAK3/JAK3/KIT/MAP3K7/MAPKAPK2/MAVS/MIF/MYD88/MZB1/NLRP3/NOD2/P2RX7/PTPRC/PYCARD/RIPK2/SEMA7A/SIRT1/SMAD7/STAT6/TBX21/TFRC/TGFB1/TGFB2/TGFB3/TICAM1/TLR3/TLR4/TLR7/TLR9/TNF/TNFRSF1B/TRAF6/TWIST1/WNT5A/XBP1	70
GO:0071214	BP	GO:0071214	cellular response to abiotic stimulus	70/754	339/18614	3.1551e-30	7.64873e-29	2.71587e-29	AGT/AKT2/AQP5/ATF4/BAX/BCL2L1/CASP1/CASP3/CASP8/CASP9/CD40/CDKN1A/COL1A1/CREBBP/EGR1/ENG/EP300/EPO/FAS/FGF2/GATA3/HSPA5/IGF1R/IL13/IL1B/IL33/IRF1/ITGB3/ITGB6/LTBR/MAPK14/MAPK3/MAPK8/MDM2/MIR21/MMP1/MMP2/MMP3/MMP9/MTOR/MYC/MYD88/NFKB1/NLRP1/NLRP3/NOX1/PARP1/PIK3R1/PRKCD/PTEN/PTGS2/PYCARD/SIRT1/SLC2A1/SMPD1/SNAI2/SOX9/TIMP1/TLR3/TLR4/TLR5/TLR7/TLR8/TNFRSF10B/TNFRSF1A/TNFRSF8/TNFSF14/TP53/YAP1/YY1	70
GO:0104004	BP	GO:0104004	cellular response to environmental stimulus	70/754	339/18614	3.1551e-30	7.64873e-29	2.71587e-29	AGT/AKT2/AQP5/ATF4/BAX/BCL2L1/CASP1/CASP3/CASP8/CASP9/CD40/CDKN1A/COL1A1/CREBBP/EGR1/ENG/EP300/EPO/FAS/FGF2/GATA3/HSPA5/IGF1R/IL13/IL1B/IL33/IRF1/ITGB3/ITGB6/LTBR/MAPK14/MAPK3/MAPK8/MDM2/MIR21/MMP1/MMP2/MMP3/MMP9/MTOR/MYC/MYD88/NFKB1/NLRP1/NLRP3/NOX1/PARP1/PIK3R1/PRKCD/PTEN/PTGS2/PYCARD/SIRT1/SLC2A1/SMPD1/SNAI2/SOX9/TIMP1/TLR3/TLR4/TLR5/TLR7/TLR8/TNFRSF10B/TNFRSF1A/TNFRSF8/TNFSF14/TP53/YAP1/YY1	70
GO:0031589	BP	GO:0031589	cell-substrate adhesion	70/754	359/18614	1.30359e-28	2.82949e-27	1.00468e-27	ABL1/ACVRL1/ANGPT1/ANGPT2/ANGPTL3/APOA1/AXL/BCL2/CCL21/CCN2/CCR7/CD34/CD44/CD63/CDC42/CDH11/CDKN2A/COL1A1/COL3A1/CSF1/CTNNB1/CX3CL1/FGB/FN1/FUT1/GREM1/GSK3B/HAS2/ITGA1/ITGAE/ITGAL/ITGAM/ITGAV/ITGAX/ITGB1/ITGB2/ITGB3/ITGB6/JAK2/KDR/LYVE1/MERTK/MIR29C/MMP12/MMP14/PDGFB/PDPN/PIK3R1/PLAU/PLG/PTEN/PTK2/PTK2B/RAC1/RHOA/ROCK1/SDC4/SERPINE1/SIGLEC1/SMAD3/SRC/SRF/TEK/THBS1/THY1/VCAM1/VEGFA/VTN/VWF/WNT1	70
GO:0045862	BP	GO:0045862	positive regulation of proteolysis	70/754	365/18614	3.77085e-28	7.79215e-27	2.7668e-27	AGER/AIM2/AKT1/APOE/AXIN1/AXIN2/BAX/BBC3/BID/CASP1/CASP8/CASP9/CAV1/CCN2/CEBPA/CLDN4/CTSD/CTSK/CTSL/CYCS/EGF/EIF2AK3/F2R/F3/FAS/FASLG/FURIN/GSK3A/GSK3B/HMGB1/HSPA1A/IFNG/IL1B/IL33/JAK2/KEAP1/LCK/LGALS9/LGMN/MDM2/MIR21/MIR29B1/MMP14/MYC/NFE2L2/NLRC4/NLRP1/NLRP3/PINK1/PPARG/PTEN/PTK2/PTK2B/PYCARD/RHOA/RIPK2/S100A8/S100A9/SIRT1/SMAD3/SMAD7/SNCA/SRC/STAT3/TNF/TNFRSF1B/TNFSF10/TREM2/WNT3A/ZC3H12A	70
GO:0007178	BP	GO:0007178	transmembrane receptor protein serine/threonine kinase signaling pathway	70/754	398/18614	8.73456e-26	1.60372e-24	5.69442e-25	ABL1/ACVRL1/ADAM17/AXIN1/BMP2/BMP4/BMP7/BMPR2/CAV1/CDH5/COL1A2/COL3A1/CREBBP/DKK1/EGR1/ENG/EP300/FGF10/FGF9/FOS/FURIN/GATA6/GDF15/GREM1/HSPA1A/HSPA5/IL17F/ITGB6/JAK2/JUN/KDR/LEF1/LOX/LRP1/LTBP1/MAP3K7/MAPK14/MAPK3/MIR146A/MIR21/MIR29B1/NKX2-1/PARP1/PPARA/PPARG/PTK2/SHH/SIRT1/SMAD1/SMAD2/SMAD3/SMAD4/SMAD7/SPI1/SRC/STAT3/TF/TGFB1/TGFB2/TGFB3/TGFBR1/TGFBR2/THBS1/TP53/TRIM33/VIM/WNT1/WNT5A/XIAP/ZEB1	70
GO:0048660	BP	GO:0048660	regulation of smooth muscle cell proliferation	69/754	176/18614	6.71571e-50	5.08216e-48	1.80455e-48	ACE2/ADIPOQ/AGT/AIF1/AKT1/APOE/BMP2/BMP4/BMPR2/CCL5/CCN4/CDKN1A/CTNNB1/CX3CL1/EDN1/ELANE/ELN/EREG/ERN1/FGF2/FGF9/FGFR2/GNA13/HBEGF/HMOX1/IFNG/IGF1/IGF1R/IGFBP3/IGFBP5/IL10/IL12B/IL13/IL15/IL18/IL6/IL6R/ITGB3/JAK2/JUN/MIR145/MIR146A/MIR21/MIR34A/MMP2/MMP9/MYD88/NOS3/NOX1/PDGFB/PDGFRB/PPARG/PPARGC1A/PTEN/PTGS2/RHOA/S1PR1/S1PR2/SOD2/SRC/STAT1/TERT/TGFB1/TGFB3/TGFBR2/THBS1/TLR4/TNF/TNFAIP3	69
GO:0048545	BP	GO:0048545	response to steroid hormone	69/754	339/18614	2.10769e-29	4.85723e-28	1.72468e-28	A2M/ABCA3/ACE/ACTA1/ADIPOQ/ADM/AIF1/ANXA1/AR/AREG/ARG1/AXIN2/BCL2/BMP4/BMP7/CASP3/CASP9/CAV1/CCN2/CCND1/CD38/CFLAR/CLDN4/COL1A1/CYBB/EDN1/ENG/EP300/EPO/ESR1/FLT3/FOS/FOSL1/GLB1/GSK3A/HSPA1A/IGF1R/IGFBP2/IL10/IL1RN/IL22/IL6/JAK2/LOX/NR3C1/PARP1/PDX1/PLAT/PPARA/PTGDS/PTGER2/PTGS2/RHOA/RXRA/SCGB1A1/SDC1/SIRT1/SPP1/SRC/TGFB1/TGFB2/TGFB3/TGFBR2/THBS1/TLR2/TNF/TP63/WNT7B/YAP1	69
GO:0010563	BP	GO:0010563	negative regulation of phosphorus metabolic process	69/754	440/18614	1.87527e-22	2.84593e-21	1.01052e-21	ABL1/ADAR/ADIPOQ/ADORA2A/AGT/AKT1/ANGPT1/APC/APOE/BAX/BMP2/BMP4/BMP7/CASP3/CAV1/CDKN1A/CDKN2A/CEBPA/DKK1/DUSP1/DUSP6/ENG/EPHB2/FABP4/GREM1/GSK3A/GSK3B/HGF/HSPB1/IFNG/IGFBP3/IL1B/IL2/IRAK3/JUN/LGALS3/LRP1/LRP5/MIR146A/MIR34A/NUP62/OCLN/PARP1/PDGFA/PDGFB/PPARA/PPARG/PRKCD/PTEN/PTPRC/PYCARD/ROCK1/SIRPA/SIRT1/SMAD7/SMPD1/SNCA/SOCS1/SOCS3/STAT3/TGFB1/TGFB2/THY1/TNF/TNFAIP3/TP53/TSG101/UBASH3B/ZC3H12A	69
GO:0090066	BP	GO:0090066	regulation of anatomical structure size	69/754	492/18614	1.09595e-19	1.3313e-18	4.72712e-19	ABL1/ACE/ACE2/ADM/ADORA2A/ADORA2B/AGT/AGTR1/AGTR2/APOE/ATG5/BMPR2/CALCA/CAV1/CCL11/CCL21/CCL24/CCL26/CCR7/CD38/CDH1/CREB1/CRP/CSF3/CXCL12/ECE1/EDN1/EDNRA/ELN/F2R/F2RL1/FGB/FN1/GSK3B/HSP90AA1/IL7R/INS/ITGA1/KCNMB1/KCNMB2/LEP/MIR21/MMP2/MTOR/NGF/NOS3/NPPB/P2RX7/PRKCD/PTEN/PTGS2/PTK2B/PYCARD/RAC1/RHOA/ROCK1/SEMA7A/SOD1/SOD2/SOD3/SPP1/SRF/TNF/VEGFA/WNT3A/WNT5A/WNT7A/WNT7B/XK	69
GO:0045766	BP	GO:0045766	positive regulation of angiogenesis	68/754	185/18614	5.52453e-47	3.51561e-45	1.24831e-45	ABL1/ACVRL1/ADM/ANGPT2/ANGPT4/ANGPTL3/C3/C5AR1/CAMP/CCL11/CCL24/CCR3/CD34/CD40/CDH5/CHI3L1/CMA1/CX3CR1/CXCL8/CXCR2/CXCR4/CYBB/ENG/F3/FGF1/FGF2/FLT1/FUT1/GATA6/GREM1/HGF/HIF1A/HMGA2/HMOX1/HSPB1/IL10/IL1A/IL1B/ITGAX/ITGB1/ITGB3/JAK1/KDR/KLF4/MIR126/MIR21/MIR29A/NFE2L2/NOS3/PIK3CD/PTK2B/S100A1/SERPINE1/SIRT1/SMAD1/SPHK1/STAT3/TEK/TERT/TGFBR2/THBS1/TJP1/TLR3/TWIST1/VEGFA/WNT5A/XBP1/ZC3H12A	68
GO:1904018	BP	GO:1904018	positive regulation of vasculature development	68/754	185/18614	5.52453e-47	3.51561e-45	1.24831e-45	ABL1/ACVRL1/ADM/ANGPT2/ANGPT4/ANGPTL3/C3/C5AR1/CAMP/CCL11/CCL24/CCR3/CD34/CD40/CDH5/CHI3L1/CMA1/CX3CR1/CXCL8/CXCR2/CXCR4/CYBB/ENG/F3/FGF1/FGF2/FLT1/FUT1/GATA6/GREM1/HGF/HIF1A/HMGA2/HMOX1/HSPB1/IL10/IL1A/IL1B/ITGAX/ITGB1/ITGB3/JAK1/KDR/KLF4/MIR126/MIR21/MIR29A/NFE2L2/NOS3/PIK3CD/PTK2B/S100A1/SERPINE1/SIRT1/SMAD1/SPHK1/STAT3/TEK/TERT/TGFBR2/THBS1/TJP1/TLR3/TWIST1/VEGFA/WNT5A/XBP1/ZC3H12A	68
GO:0043491	BP	GO:0043491	protein kinase B signaling	68/754	215/18614	4.65886e-42	2.21098e-40	7.85065e-41	AKT1/ANGPT1/AXL/CCL19/CCL2/CCL21/CCL3/CCL5/CCR7/CD28/CD40/CHI3L1/CSF3/CX3CL1/CX3CR1/DDIT3/EGF/EGFR/ENG/F10/F3/FGF2/FGFR1/GATA3/GDF15/HBEGF/HSP90AA1/IGF1/IGF1R/IGF2/IGFBP5/IL18/IL1B/INS/ITGB1/KDR/LEP/LOX/MERTK/MIR126/MIR145/MIR146A/MIR200C/MIR21/MIR29A/MIR29B1/MIR29C/MIR34A/MTOR/NOX4/OSM/PDGFA/PIK3CD/PIK3CG/PINK1/PPARA/PTEN/PTK2/SIRT1/SOX9/SRC/TEK/TGFB1/TGFBR1/THBS1/TNF/TNFSF11/TXN	68
GO:0042063	BP	GO:0042063	gliogenesis	68/754	320/18614	3.51116e-30	8.47521e-29	3.00934e-29	ABL1/ADORA2A/AGER/AKT1/AKT2/ANXA1/APP/AREG/BMP2/C1QA/C5AR1/CCL2/CCL3/CCR2/CD9/CDH2/COL3A1/CSF1/CSF1R/CTNNB1/CX3CL1/CX3CR1/CXCR4/DNER/ERBB2/F2/FGF10/FGF2/IFNG/IL1B/IL33/IL6/IL6ST/KRAS/LEF1/LIF/LPAR1/LRP1/MAP2K1/MAPK1/MAPK3/MECP2/MIR146A/MMP14/MTOR/NKX2-1/NR3C1/PTEN/PTK2B/PTPN11/RHOA/S100A8/S100A9/SHH/SOD1/SOX2/SOX9/STAT3/TGFB1/TGFB2/TLR2/TLR4/TNF/TNFRSF1B/TP53/TREM2/VIM/VTN	68
GO:0002833	BP	GO:0002833	positive regulation of response to biotic stimulus	68/754	327/18614	1.40421e-29	3.27649e-28	1.1634e-28	AIM2/ARG1/BTK/CASP1/CAV1/CCL5/CD14/CD274/CD40/CREBBP/EP300/EREG/ESR1/F2RL1/FCN1/HLA-DRB1/HMGB1/HSP90AA1/HSPA1A/IFIH1/IFNB1/IL12B/IL17A/IL17F/IL21/IRAK3/IRF1/IRF3/IRF4/IRF7/LAMP1/MAP2K6/MAP3K7/MAPKAPK2/MAVS/MIF/MIR146A/MMP12/MYD88/NFKBIA/NLRC4/NLRP1/NLRP3/NOD2/PARP9/PYCARD/RELA/RIPK2/SPI1/SRC/STING1/TBK1/TICAM1/TLR2/TLR3/TLR4/TLR5/TLR7/TLR8/TLR9/TNF/TNFAIP3/TRAF3/TRAF6/TREM2/TXK/WNT5A/XIAP	68
GO:0045936	BP	GO:0045936	negative regulation of phosphate metabolic process	68/754	439/18614	7.82354e-22	1.13502e-20	4.03018e-21	ABL1/ADAR/ADIPOQ/ADORA2A/AGT/AKT1/ANGPT1/APC/APOE/BAX/BMP2/BMP4/BMP7/CASP3/CAV1/CDKN1A/CDKN2A/CEBPA/DKK1/DUSP1/DUSP6/ENG/EPHB2/FABP4/GREM1/GSK3B/HGF/HSPB1/IFNG/IGFBP3/IL1B/IL2/IRAK3/JUN/LGALS3/LRP1/LRP5/MIR146A/MIR34A/NUP62/OCLN/PARP1/PDGFA/PDGFB/PPARA/PPARG/PRKCD/PTEN/PTPRC/PYCARD/ROCK1/SIRPA/SIRT1/SMAD7/SMPD1/SNCA/SOCS1/SOCS3/STAT3/TGFB1/TGFB2/THY1/TNF/TNFAIP3/TP53/TSG101/UBASH3B/ZC3H12A	68
GO:0009314	BP	GO:0009314	response to radiation	68/754	452/18614	4.11408e-21	5.68861e-20	2.01988e-20	AKT1/AKT2/ANGPT2/ANXA1/APP/ATF4/BAX/BCL2/BCL2L1/CASP3/CASP7/CASP9/CAT/CCL11/CCL7/CCND1/CCR4/CDKN1A/COL3A1/CREBBP/CXCL10/CXCL12/EGFR/EGR1/ELANE/EP300/FOS/FOXP3/GATA3/HIF1A/HSPA5/IL12B/IL1A/ITGB1/ITGB3/ITGB6/KIT/KRAS/MAP2K7/MAPK14/MAPK8/MDM2/MECP2/MIR21/MMP1/MMP2/MMP3/MMP9/MYC/NLRP1/PARP1/PIK3R1/PRKCD/PTGS2/PTPRC/RELA/SIRT1/SMPD1/SNAI2/SOD2/THBD/TIMP1/TNF/TP53/TXN/VCAM1/YAP1/YY1	68
GO:0031983	CC	GO:0031983	vesicle lumen	68/756	327/19518	1.03365e-30	1.58149e-28	1.12432e-28	A2M/ALB/ALOX5/APOA1/APP/ARG1/B2M/C3/CAMP/CAT/CHI3L1/CHIT1/CTSD/CXCL1/EGF/EGFR/ELANE/FASLG/FCN1/FGB/FN1/GLB1/GRP/GSDMD/HGF/HMGB1/HSP90AA1/IGF1/IGF2/INS/LCN2/LYZ/MAPK1/MAPK14/MIF/MMP8/MMRN1/MPO/NEU1/NFKB1/PDGFA/PDGFB/PF4/PLG/PPBP/PRKCD/PRTN3/PTX3/PYCARD/RNASE3/ROCK1/S100A12/S100A8/S100A9/SERPINA1/SERPINE1/SPARC/TF/TGFB1/TGFB2/TGFB3/THBS1/TIMP1/TIMP2/TIMP3/TOLLIP/VEGFA/VWF	68
GO:0050729	BP	GO:0050729	positive regulation of inflammatory response	67/754	154/18614	4.3674e-52	3.94475e-50	1.40068e-50	ACE/ADORA2B/AGT/AGTR1/AIM2/APP/BTK/C3/CASP1/CCL1/CCL24/CCL3/CCN4/CCR2/CCR7/CD28/CD47/CEBPA/CEBPB/CX3CL1/FABP4/FCGR1A/IDO1/IFNG/IL12B/IL15/IL17RA/IL18/IL1B/IL1RL1/IL2/IL21/IL23A/IL33/IL6/IL6ST/JAK2/LGALS1/MIR126/MIR21/MMP8/NEAT1/NFKBIA/NLRC4/NLRP1/NLRP3/OSM/PIK3CG/PLA2G7/PTGS2/PYCARD/S100A12/S100A8/S100A9/SERPINE1/SNCA/TLR2/TLR3/TLR4/TLR7/TLR9/TNF/TNFRSF1A/TNFSF11/TREM2/TSLP/WNT5A	67
GO:0002822	BP	GO:0002822	regulation of adaptive immune response based on somatic recombination of immune receptors built from immunoglobulin superfamily domains	67/754	190/18614	6.18765e-45	3.36416e-43	1.19453e-43	AGER/AHR/ANXA1/ARG1/B2M/BTK/C3/CCL19/CCR2/CD1A/CD1C/CD274/CD28/CD4/CD40/CD80/EPHB2/FCER2/FCGR1A/FCGR2B/FOXJ1/FOXP3/GATA3/HLA-DRA/HLA-DRB1/HMGB1/IFNA2/IFNB1/IL10/IL12B/IL18/IL1B/IL1R1/IL1RL1/IL2/IL23A/IL27/IL33/IL4/IL4R/IL6/IL7R/JAK2/JAK3/JUNB/MAP3K7/MIR21/NLRP3/NOD2/P2RX7/PLA2G4A/PTPRC/RIPK2/RIPK3/SMAD7/STAT6/TBX21/TFRC/TGFB1/TNF/TNFAIP3/TNFRSF1B/TNFSF13B/TRAF6/TREM2/TYK2/ZC3H12A	67
GO:0051402	BP	GO:0051402	neuron apoptotic process	67/754	259/18614	2.43264e-35	8.20651e-34	2.91393e-34	ABL1/ADORA2A/AGTR2/AKT2/ANGPT1/APOE/APP/ATF4/ATN1/AXL/BAX/BCL2/BCL2L1/BID/CASP3/CASP7/CASP9/CCL2/CCL3/CCND1/CEBPB/CTNNB1/CX3CL1/CX3CR1/DDIT3/F2R/FAS/FASLG/FOXO3/GAPDH/GATA3/GSK3A/HIF1A/HMOX1/HSPA5/IL10/IL6ST/ITGA1/ITGAM/JAK2/JUN/KDR/KRAS/LGMN/MAP2K7/MCL1/MECP2/NGF/NLRP1/NR3C1/PARP1/PINK1/PPARGC1A/PTK2B/RHOA/ROCK1/SNCA/SOD1/SOD2/TERT/TGFB2/TGFB3/TNF/TP53/TP63/TREM2/XIAP	67
GO:0048872	BP	GO:0048872	homeostasis of number of cells	67/754	304/18614	9.31052e-31	2.3486e-29	8.3393e-30	ABL1/ADAM17/ADAR/AKT1/ANXA1/AXL/B2M/BAX/BCL2/BMP4/BTK/CASP3/CCR4/CCR7/CDH2/CFLAR/CSF1/CX3CR1/CXCL6/CXCR2/EPO/F2R/FAS/FLT3/FOXO3/FOXP3/GATA3/HIF1A/HMGB1/HMOX1/HSPA1A/IL2/IL2RA/IL6/IL7/IL7R/ISG15/JAK2/JAK3/KIT/KITLG/KRAS/LGALS9/MAFB/MAPK14/MERTK/MIF/MYB/NOS3/P2RX7/PIK3CD/PTH/PTPN11/RIPK3/SOD1/SOX9/SPI1/SPRR2A/SRF/STAT1/STAT3/TCIRG1/TNFAIP3/TNFSF13B/TNFSF14/VEGFA/XIAP	67
GO:0060562	BP	GO:0060562	epithelial tube morphogenesis	67/754	334/18614	3.53412e-28	7.33002e-27	2.60271e-27	ABL1/ACVRL1/ADM/AGT/AGTR2/AR/AREG/BCL2/BMP2/BMP4/BMP7/CASP3/CCL11/CSF1/CSF1R/CTNNB1/CXCL10/CXCR2/CXCR4/EDN1/EDNRA/EFNB2/EGF/ENG/ESR1/FGF1/FGF10/FGF2/FGFR2/FZD3/GATA3/GLI2/GNA13/GREM1/HIF1A/ITGAX/KDR/KRAS/LEF1/LGR5/LRP5/MET/MIR21/MMP14/MYC/NKX2-1/NR3C1/PIK3CD/RHOA/SDC4/SHH/SMAD3/SMAD4/SOX9/SRC/SRF/TGFB1/TGFB2/TGFBR2/TNF/TRAF6/TWIST1/VEGFA/WNT1/WNT3A/WNT5A/YAP1	67
GO:2000146	BP	GO:2000146	negative regulation of cell motility	67/754	390/18614	4.11615e-24	6.79953e-23	2.41435e-23	ACVRL1/ADIPOQ/AGTR2/AIF1/AKT1/ANGPT2/ANGPT4/APOE/BCL2/BMP4/CCL2/CCL21/CDH1/CDH11/COL3A1/CX3CL1/CX3CR1/CXCL12/CXCL13/DPP4/DUSP1/ENG/FGF2/FOXO3/GATA3/GNA13/GREM1/HAS1/HMGB1/HMOX1/IGFBP3/IGFBP5/IL24/IL33/IL4/KLF4/LRP1/MECP2/MIF/MIR126/MIR145/MIR146A/MIR200C/MIR21/MIR29A/MIR29B1/MIR29C/MIR34A/MMP28/NFE2L2/NKX2-1/PPARG/PTEN/RAC1/RHOA/S1PR2/SERPINE1/SHH/SLURP1/SMAD7/SRF/STAT3/TGFB1/THBS1/THY1/TIMP1/TNF	67
GO:0016055	BP	GO:0016055	Wnt signaling pathway	67/754	461/18614	5.50743e-20	6.93069e-19	2.46092e-19	ABL1/APC/APOE/APP/AXIN1/AXIN2/BMP2/CAV1/CCN4/CCND1/CDC42/CDH2/COL1A1/CTNNB1/DDIT3/DKK1/EDN1/EDNRA/EGF/EGFR/EGR1/FGF10/FGF2/FGF9/FGFR2/FZD3/GATA3/GLI1/GREM1/GSK3A/GSK3B/IGFBP1/IGFBP2/KLF4/LEF1/LGR5/LRP1/LRP5/MAPK14/MBD2/MIR145/MIR29B1/MIR29C/NFATC1/NFKB1/PRKAA2/PTEN/RAC1/RHOA/SDC1/SHH/SMAD3/SNAI2/SOX2/SOX9/SRC/TERT/TGFB1/TLR2/TNFAIP3/WNT1/WNT3A/WNT5A/WNT7A/WNT7B/XIAP/YAP1	67
GO:0198738	BP	GO:0198738	cell-cell signaling by wnt	67/754	463/18614	6.98274e-20	8.61307e-19	3.05829e-19	ABL1/APC/APOE/APP/AXIN1/AXIN2/BMP2/CAV1/CCN4/CCND1/CDC42/CDH2/COL1A1/CTNNB1/DDIT3/DKK1/EDN1/EDNRA/EGF/EGFR/EGR1/FGF10/FGF2/FGF9/FGFR2/FZD3/GATA3/GLI1/GREM1/GSK3A/GSK3B/IGFBP1/IGFBP2/KLF4/LEF1/LGR5/LRP1/LRP5/MAPK14/MBD2/MIR145/MIR29B1/MIR29C/NFATC1/NFKB1/PRKAA2/PTEN/RAC1/RHOA/SDC1/SHH/SMAD3/SNAI2/SOX2/SOX9/SRC/TERT/TGFB1/TLR2/TNFAIP3/WNT1/WNT3A/WNT5A/WNT7A/WNT7B/XIAP/YAP1	67
GO:0060205	CC	GO:0060205	cytoplasmic vesicle lumen	67/756	325/19518	4.94365e-30	5.67283e-28	4.03297e-28	A2M/ALB/ALOX5/APOA1/APP/ARG1/B2M/C3/CAMP/CAT/CHI3L1/CHIT1/CTSD/CXCL1/EGF/ELANE/FASLG/FCN1/FGB/FN1/GLB1/GRP/GSDMD/HGF/HMGB1/HSP90AA1/IGF1/IGF2/INS/LCN2/LYZ/MAPK1/MAPK14/MIF/MMP8/MMRN1/MPO/NEU1/NFKB1/PDGFA/PDGFB/PF4/PLG/PPBP/PRKCD/PRTN3/PTX3/PYCARD/RNASE3/ROCK1/S100A12/S100A8/S100A9/SERPINA1/SERPINE1/SPARC/TF/TGFB1/TGFB2/TGFB3/THBS1/TIMP1/TIMP2/TIMP3/TOLLIP/VEGFA/VWF	67
GO:0042129	BP	GO:0042129	regulation of T cell proliferation	66/754	183/18614	5.32618e-45	2.95313e-43	1.04858e-43	AGER/AIF1/ANXA1/ARG1/BID/BMP4/CASP3/CCL19/CCL5/CCR2/CD209/CD274/CD28/CD40LG/CD80/CD86/CEBPB/CTLA4/CTNNB1/EPO/ERBB2/FOXJ1/FOXP3/HLA-DRB1/HMGB1/IDO1/IGF1/IGF2/IGFBP2/IL10/IL12B/IL15/IL18/IL1A/IL1B/IL2/IL21/IL23A/IL27/IL2RA/IL4/IL6/IL6ST/IRF1/JAK2/JAK3/KITLG/LEP/LGALS3/LGALS9/MIR21/PTPRC/PYCARD/RIPK2/RIPK3/SCGB1A1/SDC4/SFTPD/SHH/TFRC/TGFBR2/TNFRSF1B/TNFSF13B/TRAF6/TYK2/VCAM1	66
GO:0071706	BP	GO:0071706	tumor necrosis factor superfamily cytokine production	66/754	190/18614	8.63529e-44	4.39615e-42	1.56096e-42	ADIPOQ/AGER/ANGPT1/APP/AXL/BTK/CCL19/CCL3/CCR2/CD14/CD2/CD274/CD34/CD47/CD86/CX3CL1/CX3CR1/CYBB/EPHB2/FCGR3A/FOXP3/HMGB1/HSPB1/IFIH1/IFNG/IGF1/IL10/IL12B/IL17A/IL17F/IL1A/IL23A/IL33/IL37/IL4/IL6/IRAK3/JAK2/LEP/LGALS9/MAPKAPK2/MAVS/MIF/MMP8/MYD88/NOD2/PF4/PIK3R1/PTPN11/PTPRC/PYCARD/RIPK2/SIRPA/STAT3/THBS1/TICAM1/TLR2/TLR3/TLR4/TLR9/TNFAIP3/TNFRSF8/TREM2/TWIST1/WNT5A/ZC3H12A	66
GO:1903555	BP	GO:1903555	regulation of tumor necrosis factor superfamily cytokine production	66/754	190/18614	8.63529e-44	4.39615e-42	1.56096e-42	ADIPOQ/AGER/ANGPT1/APP/AXL/BTK/CCL19/CCL3/CCR2/CD14/CD2/CD274/CD34/CD47/CD86/CX3CL1/CX3CR1/CYBB/EPHB2/FCGR3A/FOXP3/HMGB1/HSPB1/IFIH1/IFNG/IGF1/IL10/IL12B/IL17A/IL17F/IL1A/IL23A/IL33/IL37/IL4/IL6/IRAK3/JAK2/LEP/LGALS9/MAPKAPK2/MAVS/MIF/MMP8/MYD88/NOD2/PF4/PIK3R1/PTPN11/PTPRC/PYCARD/RIPK2/SIRPA/STAT3/THBS1/TICAM1/TLR2/TLR3/TLR4/TLR9/TNFAIP3/TNFRSF8/TREM2/TWIST1/WNT5A/ZC3H12A	66
GO:0031098	BP	GO:0031098	stress-activated protein kinase signaling cascade	66/754	245/18614	5.28148e-36	1.88384e-34	6.68905e-35	AGER/AGT/APP/AXIN1/BMP2/BMP4/CCL19/CCL21/CCN2/CCR7/CD27/DUSP1/EGFR/F2RL1/FAS/FCGR2B/FOXM1/HGF/HMGB1/IGF1R/IL1A/IL1B/LEP/LGALS9/LTBR/MAP2K1/MAP2K6/MAP2K7/MAP3K7/MAPK1/MAPK14/MAPK3/MAPK8/MAPKAPK2/MMP8/MYC/MYD88/NFKB1/NLRP1/NOD2/NOX1/PINK1/PTK2B/PYCARD/RHOA/RIPK2/SIRPA/SMAD3/SPHK1/SPI1/TGFB2/TLR3/TLR4/TLR7/TLR9/TNF/TNFSF11/TRAF3/TRAF6/TREM2/VEGFA/WNT5A/WNT7A/WNT7B/XIAP/ZC3H12A	66
GO:0061448	BP	GO:0061448	connective tissue development	66/754	275/18614	1.11159e-32	3.25912e-31	1.15723e-31	ACTA2/ACVRL1/AXIN2/BGN/BMP1/BMP2/BMP4/BMP7/BMPR2/CCN2/CCN4/CD34/CD44/CFLAR/CHI3L1/COL1A1/COL3A1/CSF1/CTNNB1/CTSK/EDN1/EGR1/EIF2AK3/FGF2/FGF9/GREM1/HIF1A/HMGA2/IL17F/IL6R/ITGB3/LEP/LOX/LOXL2/LRP5/MAPK14/MAPK3/MIR21/MMP13/PDGFB/PDGFRB/PPARG/PPARGC1A/PTH/PTPN11/RORC/SERPINH1/SIRT1/SMAD1/SMAD3/SMAD7/SNAI1/SNAI2/SOX9/SPI1/SRF/TGFB1/TGFBI/TGFBR1/TGFBR2/TIMP1/WNT5A/WNT7A/WNT7B/XBP1/ZEB1	66
GO:0071559	BP	GO:0071559	response to transforming growth factor beta	66/754	280/18614	3.57206e-32	9.95202e-31	3.53371e-31	ABL1/ACTA2/ACVRL1/ADAM17/ARG1/AXIN1/BMP2/CAV1/CDH5/CFLAR/COL1A1/COL1A2/COL3A1/CREBBP/CTSK/CX3CR1/EDN1/ENG/EP300/FGFR2/FOS/FURIN/GDF15/HSPA1A/HSPA5/IGF1R/IL17F/IL4/ITGB6/JUN/LOX/LTBP1/MAP3K7/MIR21/MIR29B1/NFATC1/NKX2-1/NR3C1/PARP1/PDGFA/PPARA/PPARG/PTK2/ROCK1/SIRT1/SMAD1/SMAD2/SMAD3/SMAD4/SMAD7/SOX9/SPI1/SRC/STAT3/TGFB1/TGFB2/TGFB3/TGFBR1/TGFBR2/THBS1/TP53/TRIM33/WNT1/WNT5A/WNT7A/ZEB1	66
GO:0019216	BP	GO:0019216	regulation of lipid metabolic process	66/754	344/18614	1.3516e-26	2.60664e-25	9.25552e-26	ABCA3/ADIPOQ/ADM/AKT1/AKT2/ALK/ANGPTL3/ANXA1/APOA1/APOE/BMP2/C3/CAV1/CCL19/CCL21/CCR7/CD19/CDC42/CREB1/EGR1/F2/FGF1/FGF2/FLT1/FLT3/IFNG/IGF1R/IL1A/IL1B/INS/KIT/LEP/MIR29B1/MTOR/NFKB1/NOD2/NR3C1/PDGFA/PDGFB/PDGFRA/PDGFRB/PIK3CG/PPARA/PPARG/PPARGC1A/PRKCD/PTGS2/PTK2/PTK2B/RORC/SIRT1/SIRT3/SNAI1/SNAI2/SNCA/SOD1/SOX9/SPHK1/SRC/STAR/TAFAZZIN/TEK/TGFB1/TNF/TREM2/TWIST1	66
GO:0030336	BP	GO:0030336	negative regulation of cell migration	66/754	375/18614	2.24853e-24	3.79269e-23	1.34669e-23	ACVRL1/ADIPOQ/AGTR2/AIF1/AKT1/ANGPT2/ANGPT4/APOE/BCL2/BMP4/CCL2/CCL21/CDH1/CDH11/COL3A1/CX3CL1/CX3CR1/CXCL12/CXCL13/DPP4/DUSP1/ENG/FGF2/FOXO3/GNA13/GREM1/HAS1/HMGB1/HMOX1/IGFBP3/IGFBP5/IL24/IL33/IL4/KLF4/LRP1/MECP2/MIF/MIR126/MIR145/MIR146A/MIR200C/MIR21/MIR29A/MIR29B1/MIR29C/MIR34A/MMP28/NFE2L2/NKX2-1/PPARG/PTEN/RAC1/RHOA/S1PR2/SERPINE1/SHH/SLURP1/SMAD7/SRF/STAT3/TGFB1/THBS1/THY1/TIMP1/TNF	66
GO:0001558	BP	GO:0001558	regulation of cell growth	66/754	420/18614	1.45184e-21	2.05831e-20	7.30854e-21	ABL1/ACVRL1/ADAM10/ADAM17/AGT/AGTR1/AGTR2/AKT1/APOE/BCAR1/BCL2/BMPR2/CD38/CDC42/CDH1/CDKN1A/CDKN2A/CXCL12/CXCL16/CXCR4/EDN1/EGFR/ERBB2/F2/FN1/GREM1/GSK3A/GSK3B/HBEGF/HSPA1A/IGF1/IGFBP1/IGFBP3/IGFBP5/IL2/IL9/INS/KRT17/MMP14/MTOR/NGF/NPPB/PPARA/PTK2B/RHOA/S100A8/S100A9/SEMA7A/SIRT1/SMAD3/SMAD4/SMAD7/SPHK1/SPP1/SRF/TGFB1/TGFB2/TGFBR1/TNC/TP53/TSG101/VEGFA/WNT3A/WNT5A/YAP1/YY1	66
GO:0034774	CC	GO:0034774	secretory granule lumen	66/756	322/19518	1.93532e-29	1.77662e-27	1.26305e-27	A2M/ALB/ALOX5/APOA1/APP/ARG1/B2M/C3/CAMP/CAT/CHI3L1/CHIT1/CTSD/CXCL1/EGF/ELANE/FCN1/FGB/FN1/GLB1/GRP/GSDMD/HGF/HMGB1/HSP90AA1/IGF1/IGF2/INS/LCN2/LYZ/MAPK1/MAPK14/MIF/MMP8/MMRN1/MPO/NEU1/NFKB1/PDGFA/PDGFB/PF4/PLG/PPBP/PRKCD/PRTN3/PTX3/PYCARD/RNASE3/ROCK1/S100A12/S100A8/S100A9/SERPINA1/SERPINE1/SPARC/TF/TGFB1/TGFB2/TGFB3/THBS1/TIMP1/TIMP2/TIMP3/TOLLIP/VEGFA/VWF	66
GO:0045121	CC	GO:0045121	membrane raft	66/756	323/19518	2.34643e-29	1.79502e-27	1.27613e-27	ACE2/ADAM17/ANGPT1/APP/BMPR2/BSG/BTK/CASP3/CASP8/CAV1/CD14/CD19/CD1A/CD2/CD4/CD79A/CD8A/CDH1/CDH2/CFLAR/CTNNB1/CTSD/DPP4/EGFR/F2R/FAS/FASLG/FURIN/HAS2/HMOX1/IGF1R/IL6ST/ITGA1/ITGAM/ITGB1/ITGB2/JAK2/KDR/LCK/MAPK1/MAPK3/MS4A1/NOS3/PDPN/PECAM1/PRTN3/PTGS2/PTK2B/PTPRC/S1PR1/SDC4/SELE/SERPINH1/SHH/SLC2A1/SRC/STAT6/TEK/TGFBR1/TGFBR2/THY1/TLR2/TNF/TNFRSF1A/TNFRSF1B/TREM2	66
GO:0098857	CC	GO:0098857	membrane microdomain	66/756	324/19518	2.84261e-29	1.86394e-27	1.32513e-27	ACE2/ADAM17/ANGPT1/APP/BMPR2/BSG/BTK/CASP3/CASP8/CAV1/CD14/CD19/CD1A/CD2/CD4/CD79A/CD8A/CDH1/CDH2/CFLAR/CTNNB1/CTSD/DPP4/EGFR/F2R/FAS/FASLG/FURIN/HAS2/HMOX1/IGF1R/IL6ST/ITGA1/ITGAM/ITGB1/ITGB2/JAK2/KDR/LCK/MAPK1/MAPK3/MS4A1/NOS3/PDPN/PECAM1/PRTN3/PTGS2/PTK2B/PTPRC/S1PR1/SDC4/SELE/SERPINH1/SHH/SLC2A1/SRC/STAT6/TEK/TGFBR1/TGFBR2/THY1/TLR2/TNF/TNFRSF1A/TNFRSF1B/TREM2	66
GO:0050921	BP	GO:0050921	positive regulation of chemotaxis	65/754	143/18614	4.5223e-52	4.01982e-50	1.42734e-50	ADAM10/ADAM17/AGER/AIF1/BMPR2/C5AR1/CCL1/CCL19/CCL21/CCL26/CCL3/CCL4/CCL5/CCL7/CCR1/CCR2/CCR4/CCR6/CCR7/CSF1/CSF1R/CX3CR1/CXCL10/CXCL12/CXCL13/CXCL17/CXCL8/CXCR2/CXCR4/EDN1/F2RL1/F3/FGF10/FGF2/FGFR1/HMGB1/HSPB1/IL23A/IL4/IL6/IL6R/KDR/LGALS9/LGMN/LPAR1/MAPK1/MAPK3/MCU/MET/PDGFB/PDGFRB/PLA2G7/PTK2/PTK2B/RAC1/S1PR1/SERPINE1/SMAD3/SPI1/TGFB1/THBS1/TNFSF14/TREM2/VEGFA/WNT5A	65
GO:0032946	BP	GO:0032946	positive regulation of mononuclear cell proliferation	65/754	148/18614	7.14021e-51	6.15156e-49	2.18427e-49	AGER/AIF1/ANXA1/BCL2/BCL2L1/BTK/CCL19/CCL5/CCR2/CD209/CD274/CD28/CD38/CD40/CD40LG/CD80/CD86/CDKN1A/CSF1/EPHB2/EPO/FCGR3A/FGF10/FOXP3/HMGB1/IGF1/IGF2/IGFBP2/IL12B/IL13/IL15/IL18/IL1A/IL1B/IL2/IL21/IL23A/IL2RA/IL4/IL5/IL6/IL6ST/IL7/JAK2/JAK3/KITLG/LEP/LGALS9/MIF/MIR21/MYD88/PTPRC/PYCARD/RIPK2/SHH/TFRC/TGFBR2/TICAM1/TLR4/TLR9/TNFSF13B/TRAF6/TYK2/VCAM1/WNT3A	65
GO:0002285	BP	GO:0002285	lymphocyte activation involved in immune response	65/754	208/18614	7.28547e-40	3.0908e-38	1.09747e-38	ABL1/AICDA/ANXA1/CCL19/CCR6/CD19/CD1C/CD28/CD40/CD40LG/CD80/CD86/F2RL1/FCGR2B/FCGR3A/FOXP3/GATA3/HLA-DRA/HLA-DRB1/HMGB1/ICAM1/IFNA1/IFNA2/IFNB1/IFNG/IL10/IL12B/IL18/IL2/IL21/IL23A/IL27/IL4/IL4R/IL6/IL6R/IRF4/IRF8/ITGAL/JAK3/JUNB/LAMP1/LEF1/LGALS1/LGALS3/LGALS9/MIR21/MTOR/MYB/NLRP3/PTK2B/PTPRC/RIPK2/RORC/SMAD7/SPI1/STAT3/STAT6/TBX21/TFRC/TGFB1/TLR4/TP53/XBP1/ZC3H12A	65
GO:0071560	BP	GO:0071560	cellular response to transforming growth factor beta stimulus	65/754	274/18614	7.11753e-32	1.9443e-30	6.90373e-31	ABL1/ACTA2/ACVRL1/ADAM17/ARG1/AXIN1/BMP2/CAV1/CDH5/CFLAR/COL1A1/COL1A2/COL3A1/CREBBP/CTSK/CX3CR1/EDN1/ENG/EP300/FGFR2/FOS/FURIN/GDF15/HSPA1A/HSPA5/IGF1R/IL17F/IL4/ITGB6/JUN/LOX/LTBP1/MAP3K7/MIR21/MIR29B1/NFATC1/NKX2-1/NR3C1/PARP1/PDGFA/PPARA/PPARG/PTK2/SIRT1/SMAD1/SMAD2/SMAD3/SMAD4/SMAD7/SOX9/SPI1/SRC/STAT3/TGFB1/TGFB2/TGFB3/TGFBR1/TGFBR2/THBS1/TP53/TRIM33/WNT1/WNT5A/WNT7A/ZEB1	65
GO:0048771	BP	GO:0048771	tissue remodeling	64/754	181/18614	4.91487e-43	2.43569e-41	8.64852e-42	ACE/ACVRL1/AGT/AGTR2/ARG1/ATG5/AXL/BAX/BMPR2/CALCA/CAV1/CCR2/CD38/CSF1R/CST3/CTNNB1/CTSK/EDNRA/F2R/FGF10/GREM1/HIF1A/IGFBP5/IL12B/IL15/IL18/IL1A/IL2/IL21/IL23A/IL6/IL7/ITGB3/LEP/LIF/LRP5/MDM2/MIR29B1/MIR34A/MMP14/MMP2/NFKB1/NOS3/NOX4/P2RX7/PLG/PPARG/PTH/PTK2B/ROCK1/S1PR1/SPP1/SRC/SYT7/TCIRG1/TF/TFRC/TGFB1/TIMP1/TNFAIP3/TNFSF11/TP53/TRAF6/UBASH3B	64
GO:0097696	BP	GO:0097696	receptor signaling pathway via STAT	64/754	184/18614	1.59725e-42	7.71088e-41	2.73794e-41	AGT/CAV1/CCL2/CCL5/CCR2/CD40/CSF1R/CSF2/CSF2RB/EGF/EPHB2/EPO/F2/F2R/FLT3/IFNA1/IFNA2/IFNAR1/IFNB1/IFNG/IGF1/IL10/IL10RA/IL12B/IL13/IL15/IL18/IL2/IL21/IL23A/IL24/IL3/IL4/IL5/IL6/IL6R/IL6ST/IL7R/IL9/JAK1/JAK2/JAK3/KIT/LEP/LIF/MIR146A/OSM/PARP9/PPARG/PTK2B/PTPRC/SOCS1/SOCS3/STAT1/STAT2/STAT3/STAT4/STAT5A/STAT6/TGFB1/TNF/TNFRSF1A/TSLP/TYK2	64
GO:0051403	BP	GO:0051403	stress-activated MAPK cascade	64/754	237/18614	5.28718e-35	1.74166e-33	6.1842e-34	AGER/AGT/APP/AXIN1/BMP2/BMP4/CCL19/CCL21/CCN2/CCR7/CD27/DUSP1/EGFR/F2RL1/FAS/FCGR2B/FOXM1/HGF/HMGB1/IGF1R/IL1A/IL1B/LEP/LGALS9/LTBR/MAP2K1/MAP2K6/MAP2K7/MAP3K7/MAPK1/MAPK14/MAPK3/MAPK8/MAPKAPK2/MMP8/MYC/MYD88/NFKB1/NOD2/NOX1/PINK1/PTK2B/PYCARD/RIPK2/SIRPA/SMAD3/SPHK1/SPI1/TGFB2/TLR3/TLR4/TLR7/TLR9/TNF/TNFSF11/TRAF3/TRAF6/TREM2/VEGFA/WNT5A/WNT7A/WNT7B/XIAP/ZC3H12A	64
GO:0097193	BP	GO:0097193	intrinsic apoptotic signaling pathway	64/754	301/18614	1.82044e-28	3.92096e-27	1.39223e-27	ABL1/AKT1/ATF4/BAX/BBC3/BCL2/BCL2A1/BCL2L1/BECN1/BID/CASP3/CASP9/CAV1/CD44/CDKN1A/CEBPB/CXCL12/CYCS/DDIT3/EIF2AK3/EP300/EPO/ERN1/HIF1A/HMOX1/HSPA1A/HSPB1/INS/JAK2/LCK/MCL1/MDM2/MIF/MIR21/MMP9/MUC1/MYC/NFE2L2/NOX1/PARP1/PDX1/PIK3R1/PINK1/PLAUR/PRKCD/PTGS2/PYCARD/RIPK3/S100A8/S100A9/SIRT1/SNAI1/SNAI2/SOD1/SOD2/SRC/TNF/TNFRSF10B/TNFRSF1A/TNFRSF1B/TP53/TP63/TREM2/XBP1	64
GO:0042742	BP	GO:0042742	defense response to bacterium	64/754	314/18614	2.30473e-27	4.62598e-26	1.64257e-26	ADAM17/AICDA/C5AR1/CAMP/CASP7/CCL20/CD4/CEBPB/CRP/CXCL13/CXCL6/DROSHA/ELANE/F2/F2RL1/FCGR1A/FGB/GSDMD/IL10/IL12B/IL17A/IL17F/IL18/IL1B/IL23A/IL6/IL6R/IL7R/IRF8/ISG15/LCN2/LYZ/MAVS/MPO/MYD88/NLRC4/NLRP1/NOD2/NOS2/P2RX7/PLA2G1B/PPBP/PRKCD/PYCARD/RIPK2/RNASE3/S100A12/S100A8/S100A9/SELP/SERPINE1/SFTPD/SPRR2A/TBK1/TF/TFEB/TLR2/TLR3/TLR4/TLR9/TNF/TNFRSF1A/TREM1/TREM2	64
GO:0072001	BP	GO:0072001	renal system development	64/754	320/18614	7.09475e-27	1.38131e-25	4.9047e-26	ACE/ACTA2/ADIPOQ/AGT/AGTR1/AGTR2/ANGPT1/ANGPT2/BAX/BCL2/BMP2/BMP4/BMP7/CASP9/CAT/CD34/CFLAR/CTNNB1/CXCR2/EDNRA/EFNB2/EGR1/EPCAM/FGF1/FGF10/FGF2/FGFR2/FOXJ1/GATA3/GLI2/GREM1/HAS2/IL6R/ITGB3/LGR5/LIF/MMP9/MYC/PDGFA/PDGFB/PDGFRA/PDGFRB/PECAM1/PROM1/REN/RHOA/SDC1/SDC4/SHH/SMAD1/SMAD2/SMAD3/SMAD4/SMAD7/SOX9/STAT1/TEK/TGFB2/TGFBR1/VEGFA/WNT1/WNT5A/WNT7B/YAP1	64
GO:0006816	BP	GO:0006816	calcium ion transport	64/754	455/18614	2.15193e-18	2.3629e-17	8.39008e-18	ABL1/ACE/ADORA2A/AGT/ATG5/BAX/BCL2/CAV1/CCL19/CCL2/CCL21/CCL3/CCL4/CCL5/CCL8/CCN2/CCR1/CCR5/CCR7/CD19/CD4/CTNNB1/CX3CL1/CXCL10/CXCL11/CXCL12/CXCL9/CXCR4/DDIT3/EDN1/EDNRA/EGF/EPO/F2/F2R/FASLG/FGF2/IL13/ITGAV/ITGB3/JAK3/LCK/LGALS3/MCU/MIR200C/MIR21/MIR34A/MS4A1/NOS3/P2RX7/PDGFB/PDGFRB/PIK3CG/PLA2G1B/PTGS2/PTK2B/PTPRC/RHOA/RRAD/SNCA/THY1/TLR9/UBASH3B/WNT3A	64
GO:0071621	BP	GO:0071621	granulocyte chemotaxis	63/754	131/18614	1.96883e-52	1.83757e-50	6.52476e-51	ANXA1/BSG/C5AR1/CCL1/CCL11/CCL13/CCL17/CCL18/CCL19/CCL2/CCL20/CCL21/CCL22/CCL24/CCL26/CCL3/CCL4/CCL5/CCL7/CCL8/CCR7/CSF1/CSF1R/CX3CL1/CXCL1/CXCL10/CXCL11/CXCL13/CXCL17/CXCL2/CXCL3/CXCL5/CXCL6/CXCL8/CXCL9/CXCR1/CXCR2/DPP4/EDN1/IL17RA/IL1B/IL23A/IL4/ITGA1/ITGB2/LGALS3/MAPK1/MAPK3/MCU/NOD2/PF4/PIK3CD/PIK3CG/PLA2G1B/PPBP/PTK2/RAC1/S100A12/S100A8/S100A9/TGFB2/THBS1/TREM1	63
GO:0050671	BP	GO:0050671	positive regulation of lymphocyte proliferation	63/754	145/18614	5.77406e-49	4.19932e-47	1.49107e-47	AGER/AIF1/ANXA1/BCL2/BTK/CCL19/CCL5/CCR2/CD209/CD274/CD28/CD38/CD40/CD40LG/CD80/CD86/CDKN1A/EPHB2/EPO/FCGR3A/FGF10/FOXP3/HMGB1/IGF1/IGF2/IGFBP2/IL12B/IL13/IL15/IL18/IL1A/IL1B/IL2/IL21/IL23A/IL2RA/IL4/IL5/IL6/IL6ST/IL7/JAK2/JAK3/KITLG/LEP/LGALS9/MIF/MIR21/MYD88/PTPRC/PYCARD/RIPK2/SHH/TFRC/TGFBR2/TICAM1/TLR4/TLR9/TNFSF13B/TRAF6/TYK2/VCAM1/WNT3A	63
GO:0010634	BP	GO:0010634	positive regulation of epithelial cell migration	63/754	176/18614	9.45497e-43	4.64227e-41	1.64836e-41	ABL1/ADAM17/AGT/AKT1/ANGPT1/ANGPT4/ANXA1/BCAR1/BMP4/BMPR2/CD40/EDN1/EGF/ENPP2/FGF1/FGF10/FGF2/FGF7/FGFR1/FUT1/GATA3/HAS2/HBEGF/HDAC9/HIF1A/HMGB1/HMOX1/HSPB1/IFNG/ITGB3/JUN/KDR/LGMN/MET/MIR126/MIR146A/MIR21/MIR29A/MMP9/MTOR/NFE2L2/NOS3/PDGFB/PIK3CD/PIK3CG/PTGS2/PTK2/PTK2B/RAC1/SIRT1/SOX9/SPARC/SRC/STAT5A/TEK/TGFB1/TGFB2/TGFBR2/THBS1/VEGFA/WNT5A/WNT7A/ZC3H12A	63
GO:0032640	BP	GO:0032640	tumor necrosis factor production	63/754	185/18614	3.17398e-41	1.44506e-39	5.13106e-40	ADIPOQ/AGER/ANGPT1/APP/AXL/BTK/CCL19/CCL3/CCR2/CD14/CD2/CD34/CD47/CX3CL1/CX3CR1/CYBB/EPHB2/FCGR3A/FOXP3/HMGB1/HSPB1/IFIH1/IFNG/IGF1/IL10/IL12B/IL17A/IL1A/IL23A/IL33/IL37/IL4/IL6/IRAK3/JAK2/LEP/LGALS9/MAPKAPK2/MAVS/MIF/MMP8/MYD88/NOD2/PF4/PIK3R1/PTPN11/PTPRC/PYCARD/RIPK2/SIRPA/STAT3/THBS1/TICAM1/TLR2/TLR3/TLR4/TLR9/TNFAIP3/TNFRSF8/TREM2/TWIST1/WNT5A/ZC3H12A	63
GO:0032680	BP	GO:0032680	regulation of tumor necrosis factor production	63/754	185/18614	3.17398e-41	1.44506e-39	5.13106e-40	ADIPOQ/AGER/ANGPT1/APP/AXL/BTK/CCL19/CCL3/CCR2/CD14/CD2/CD34/CD47/CX3CL1/CX3CR1/CYBB/EPHB2/FCGR3A/FOXP3/HMGB1/HSPB1/IFIH1/IFNG/IGF1/IL10/IL12B/IL17A/IL1A/IL23A/IL33/IL37/IL4/IL6/IRAK3/JAK2/LEP/LGALS9/MAPKAPK2/MAVS/MIF/MMP8/MYD88/NOD2/PF4/PIK3R1/PTPN11/PTPRC/PYCARD/RIPK2/SIRPA/STAT3/THBS1/TICAM1/TLR2/TLR3/TLR4/TLR9/TNFAIP3/TNFRSF8/TREM2/TWIST1/WNT5A/ZC3H12A	63
GO:0009612	BP	GO:0009612	response to mechanical stimulus	63/754	215/18614	8.71119e-37	3.31855e-35	1.17833e-35	ACTA1/AGT/ANGPT2/CASP1/CASP8/CD40/CDH2/CHI3L1/COL1A1/CSF1/CTNNB1/CXCL10/CXCL12/CXCR4/EDN1/ENG/FAS/FGF2/FOS/FOSL1/IGF1R/IGFBP2/IL13/IL1B/IL33/IRF1/ITGB3/JUN/KIT/KRT5/LTBR/MAPK14/MAPK3/MAPK8/MBD2/MMP14/MMP2/MPO/MYD88/NFKB1/NFKBIA/P2RX7/PTGS2/PTK2/PTK2B/RELA/RHOA/SLC2A1/SOX9/SRC/STAT1/TGFBR2/THBS1/TLR3/TLR4/TLR5/TLR7/TLR8/TNF/TNFRSF10B/TNFRSF1A/TNFRSF8/TNFSF14	63
GO:0006909	BP	GO:0006909	phagocytosis	63/754	236/18614	3.80479e-34	1.20377e-32	4.27431e-33	ABL1/ADIPOQ/ADORA2A/AIF1/ANXA1/APOA1/ATG5/AXL/BECN1/BTK/C3/CCL2/CD14/CD47/CDC42/CRP/ELANE/F2RL1/FCGR1A/FCGR2B/FCN1/HMGB1/IFNG/IL15/IL1B/IL2RB/IRF8/ITGAL/ITGAM/ITGAV/ITGB1/ITGB2/ITGB3/LEP/LRP1/MARCO/MERTK/MET/MFGE8/MSR1/MYD88/NOD2/P2RX7/PECAM1/PRKCD/PRTN3/PTK2/PTPRC/PTX3/PYCARD/RAC1/SFTPA1/SFTPD/SIRPA/SOD1/SPHK1/SRC/SYT7/THBS1/TLR2/TLR4/TNF/TREM2	63
GO:0043122	BP	GO:0043122	regulation of I-kappaB kinase/NF-kappaB signaling	63/754	258/18614	1.07103e-31	2.91154e-30	1.03382e-30	ABL1/ADIPOQ/ANGPT1/CASP1/CASP8/CCL19/CCL21/CCR7/CD4/CD40/CFLAR/CHUK/CTNNB1/CX3CL1/ESR1/F2R/F2RL1/FASLG/GAPDH/HLA-DRB1/HMOX1/HSPB1/IL1A/IL1B/IRF3/LGALS1/LGALS9/LPAR1/LTBR/MAP3K7/MAVS/MYD88/NOD2/NUP62/PINK1/PYCARD/RELA/RHOA/RIPK2/S100A12/S100A4/S100B/SIRT1/SQSTM1/STAT1/TBK1/TFRC/TICAM1/TLR3/TLR4/TLR9/TNF/TNFAIP3/TNFRSF10B/TNFRSF1A/TNFSF10/TNFSF11/TRAF3/TRAF6/TREM2/TRIM21/WNT5A/ZC3H12A	63
GO:0001822	BP	GO:0001822	kidney development	63/754	310/18614	7.1039e-27	1.38131e-25	4.9047e-26	ACE/ACTA2/ADIPOQ/AGT/AGTR1/AGTR2/ANGPT1/ANGPT2/BAX/BCL2/BMP2/BMP4/BMP7/CASP9/CAT/CD34/CFLAR/CTNNB1/CXCR2/EDNRA/EFNB2/EGR1/EPCAM/FGF1/FGF10/FGF2/FGFR2/FOXJ1/GATA3/GLI2/GREM1/HAS2/IL6R/ITGB3/LIF/MMP9/MYC/PDGFA/PDGFB/PDGFRA/PDGFRB/PECAM1/PROM1/REN/RHOA/SDC1/SDC4/SHH/SMAD1/SMAD2/SMAD3/SMAD4/SMAD7/SOX9/STAT1/TEK/TGFB2/TGFBR1/VEGFA/WNT1/WNT5A/WNT7B/YAP1	63
GO:0051235	BP	GO:0051235	maintenance of location	63/754	347/18614	4.61831e-24	7.58432e-23	2.693e-23	ABL1/AKT1/ALB/ANGPTL3/ANXA1/APOA1/APOE/ATG5/BAX/C3/CAV1/CCL19/CCL21/CCL3/CCR5/CCR7/CD19/CD4/CRP/CX3CL1/CXCL10/CXCL11/CXCL9/DDIT3/F2/F2R/FASLG/FCER2/FGF2/HSPA5/IL10/IL13/IL1B/IL6/ITGAV/ITGB3/KEAP1/LCK/LCN2/LEP/LTBP1/MIR146A/MIR34A/MSR1/NFKB1/NFKBIA/P2RX7/PINK1/PLA2G4C/PPARA/PPARG/PTK2B/PTPRC/S100A8/S100A9/SIRT1/SNCA/THY1/TNF/TREM2/TXN/UBASH3B/ZC3H12A	63
GO:0051051	BP	GO:0051051	negative regulation of transport	63/754	483/18614	1.74518e-16	1.63976e-15	5.82239e-16	ACE/ADIPOQ/AKT1/AKT2/ANGPT1/ANXA1/APOE/ATF4/ATG5/BCL2/CAV1/CCR2/CD47/EDN1/EGF/EPHB2/EPO/F2R/F2RL1/FCGR2B/GRP/GSK3A/HMGB1/HMOX1/IL11/IL12B/IL13RA2/IL1B/INS/ITGAV/ITGB3/LEP/LGALS3/LGALS9/LIF/MIR146A/MIR200C/MIR29B1/MIR326/MIR34A/MMP9/NFKB1/NOS3/OSM/PRTN3/PTEN/PTGS2/PTK2B/PTPN11/RAC1/RRAD/SHH/SIRPA/SNCA/SPI1/THBS1/TLR2/TLR9/TNF/TNFRSF1A/TNFRSF1B/TWIST1/TXN	63
GO:0140297	MF	GO:0140297	DNA-binding transcription factor binding	63/751	478/18369	1.60607e-16	5.84754e-15	4.00364e-15	ACTB/AHR/AR/ATF4/BCL2/CD34/CDKN2A/CEBPA/CEBPB/CREB1/CREBBP/CTNNB1/DDIT3/EP300/ESR1/FLT3/FOS/FOXP3/GATA3/GATA6/GSK3B/HDAC9/HIF1A/HMGA2/HMGB1/HSPB1/IFI27/JUN/KEAP1/KLF4/LEF1/MAPK14/MAPK3/MYC/NFATC1/NFE2L2/NFKBIA/NKX2-1/NLRP3/PARP1/PARP9/PITX2/PPARA/PPARG/PPARGC1A/RELA/RXRA/SIRT1/SMAD2/SMAD3/SMAD4/SOX9/SPI1/SRC/SRF/STAT1/STAT3/STAT5A/STING1/TP53/TWIST1/YAP1/YY1	63
GO:0070555	BP	GO:0070555	response to interleukin-1	62/754	141/18614	1.36304e-48	9.42347e-47	3.34604e-47	ANXA1/APP/CAMP/CCL1/CCL11/CCL13/CCL17/CCL18/CCL19/CCL2/CCL20/CCL21/CCL22/CCL24/CCL26/CCL3/CCL4/CCL5/CCL7/CCL8/CD38/CD40/CD47/CEBPB/CHI3L1/CX3CL1/CXCL8/EDN1/EGR1/EPO/FGB/HAS2/HIF1A/IL17A/IL1B/IL1R1/IL1R2/IL1RN/IL6/IRAK3/LGALS9/MAP2K7/MAP3K7/MAPK3/MIR146A/MIR21/MMP2/MYD88/NFKB1/PYCARD/RELA/RIPK2/SELE/SIRPA/SMPD1/SNCA/SOX9/SRC/TOLLIP/TRAF6/YY1/ZC3H12A	62
GO:0007259	BP	GO:0007259	receptor signaling pathway via JAK-STAT	62/754	173/18614	4.04599e-42	1.93654e-40	6.87618e-41	AGT/CAV1/CCL2/CCL5/CCR2/CD40/CSF1R/CSF2/CSF2RB/EGF/EPHB2/EPO/F2/F2R/FLT3/IFNA1/IFNA2/IFNAR1/IFNB1/IFNG/IGF1/IL10/IL10RA/IL12B/IL13/IL15/IL18/IL2/IL21/IL23A/IL24/IL3/IL4/IL5/IL6/IL6R/IL6ST/IL7R/IL9/JAK1/JAK2/JAK3/KIT/LEP/LIF/MIR146A/OSM/PARP9/PTK2B/PTPRC/SOCS1/SOCS3/STAT1/STAT2/STAT3/STAT4/STAT5A/STAT6/TNF/TNFRSF1A/TSLP/TYK2	62
GO:0045619	BP	GO:0045619	regulation of lymphocyte differentiation	62/754	212/18614	3.69131e-36	1.32509e-34	4.70505e-35	ABL1/ACTB/ANXA1/AXL/BMP4/BTK/CCL19/CCR2/CD2/CD27/CD28/CD80/CD86/CTLA4/DROSHA/ERBB2/FOXJ1/FOXO3/FOXP3/GATA3/GLI2/HLA-DRA/HLA-DRB1/HMGB1/IFNA2/IFNB1/IFNG/IL10/IL12B/IL15/IL18/IL2/IL23A/IL27/IL2RA/IL4/IL4R/IL7/IL7R/IRF1/IRF4/JAK3/JUNB/LEF1/LGALS9/MIR21/MMP14/NLRP3/PTPRC/RHOA/RIPK2/SHH/SMAD7/SOCS1/SOD1/SPI1/TBX21/TGFBR2/TLR9/XBP1/ZC3H12A/ZEB1	62
GO:0010594	BP	GO:0010594	regulation of endothelial cell migration	62/754	232/18614	1.20193e-33	3.71866e-32	1.32041e-32	ABL1/ACVRL1/ADAM17/AGT/AGTR2/AKT1/ANGPT1/ANGPT2/ANGPT4/ANXA1/APOE/BCAR1/BMP4/BMPR2/CD40/CXCL13/EDN1/EGF/FGF1/FGF2/FGFR1/FUT1/GATA3/HDAC9/HIF1A/HMGB1/HMOX1/HSPB1/ITGB3/KDR/KLF4/LGMN/MECP2/MET/MIR126/MIR146A/MIR200C/MIR21/MIR29A/MIR29C/NFE2L2/NOS3/PDGFB/PIK3CD/PIK3CG/PPARG/PTGS2/PTK2/PTK2B/RAC1/RHOA/SIRT1/SPARC/STAT5A/TEK/TGFB1/THBS1/TNF/VEGFA/WNT5A/WNT7A/ZC3H12A	62
GO:0001649	BP	GO:0001649	osteoblast differentiation	62/754	250/18614	1.27664e-31	3.40436e-30	1.2088e-30	ADAR/AKT1/AREG/ATF4/AXIN2/BMP2/BMP4/BMP7/BMPR2/CAT/CCL3/CCN4/CEBPA/CEBPB/COL1A1/CTNNB1/FASN/FGF2/FGF9/FGFR2/GLI1/GLI2/GREM1/GSK3B/HGF/IGF1/IGF2/IGFBP3/IGFBP5/IL6/IL6R/IL6ST/JUNB/LEF1/LOX/LRP5/MAP2K6/MAPK14/MIR200C/MIR21/MIR29B1/PPARG/PTK2/SEMA7A/SHH/SMAD1/SMAD3/SMAD4/SNAI1/SNAI2/SOX2/SOX9/SPP1/TCIRG1/TNC/TNF/TP63/TWIST1/VCAN/WNT3A/WNT7B/YAP1	62
GO:0006959	BP	GO:0006959	humoral immune response	62/754	250/18614	1.27664e-31	3.40436e-30	1.2088e-30	A2M/ALOX5/BCL2/C1QA/C3/CAMP/CCL13/CCL2/CCR6/CCR7/CD28/CFHR1/CXCL1/CXCL10/CXCL11/CXCL13/CXCL14/CXCL2/CXCL3/CXCL5/CXCL6/CXCL8/CXCL9/ELANE/F2/FCER2/FCGR2B/FCN1/FGB/FOXJ1/GAPDH/GATA3/GATA6/HLA-DRB1/IFNA1/IFNA2/IFNB1/IFNG/IL17A/IL17F/IL1B/IL6/IL7/LYZ/MS4A1/NOD2/PDCD1/PF4/PLA2G1B/PPBP/PRTN3/PTPRC/RNASE3/S100A12/S100A9/SFTPD/SPRR2A/TF/TFEB/TNF/TREM1/TREM2	62
GO:0031348	BP	GO:0031348	negative regulation of defense response	62/754	284/18614	2.81372e-28	5.94597e-27	2.11127e-27	A2M/ADAR/ADIPOQ/ADORA2A/ALOX5/APCS/APOA1/APOE/ARG1/ATG5/CDH5/CX3CL1/CXCL17/ELANE/ENPP3/F2RL1/FCGR2B/FOXP3/FURIN/GATA3/HGF/HLA-DRB1/IGF1/IL10/IL12B/IL13/IL2/IL2RA/IL4/INS/IRAK3/ISG15/KLF4/LGALS9/MAPK14/MIR126/MIR145/MIR146A/MIR21/MMP12/NFKB1/NLRP3/NOD2/NT5E/PARP1/PPARA/PPARG/PRKCD/PTPRC/SIRPA/SMAD3/SOCS3/SOD1/SRC/STAT2/TEK/TGFB1/TNFAIP3/TNFRSF1A/TNFRSF1B/TREM2/TRIM21	62
GO:0045089	BP	GO:0045089	positive regulation of innate immune response	62/754	300/18614	6.96059e-27	1.36291e-25	4.83936e-26	AIM2/BTK/CASP1/CAV1/CCL5/CD14/CD40/CREBBP/EP300/EREG/ESR1/F2RL1/FCN1/HMGB1/HSP90AA1/HSPA1A/IFIH1/IFNB1/IL12B/IL21/IRAK3/IRF1/IRF3/IRF4/IRF7/LAMP1/MAP2K6/MAP3K7/MAPKAPK2/MAVS/MIR146A/MMP12/MYD88/NFKBIA/NLRC4/NLRP1/NLRP3/NOD2/PARP9/PYCARD/RELA/RIPK2/SPI1/SRC/STING1/TBK1/TICAM1/TLR2/TLR3/TLR4/TLR5/TLR7/TLR8/TLR9/TNF/TNFAIP3/TRAF3/TRAF6/TREM2/TXK/WNT5A/XIAP	62
GO:0030198	BP	GO:0030198	extracellular matrix organization	62/754	314/18614	9.60014e-26	1.75689e-24	6.23827e-25	ABL1/ADAM10/AGT/APP/AXIN2/BMP1/BMP2/CAV1/CCN2/CFLAR/CMA1/COL1A1/COL1A2/COL3A1/CST3/CTSK/DPP4/ELANE/ELN/ENG/FAP/FURIN/GREM1/HAS1/HAS2/IL6/ITGB1/ITGB3/LOX/LOXL2/LRP1/MIR29B1/MMP1/MMP10/MMP11/MMP12/MMP13/MMP14/MMP2/MMP28/MMP3/MMP7/MMP8/MMP9/NOX1/PDGFRA/PDPN/PLG/POSTN/PTX3/SERPINH1/SMAD3/SOX9/TGFB1/TGFB2/TGFBI/TGFBR1/TNF/TNFRSF1A/TNFRSF1B/VTN/WNT3A	62
GO:0043062	BP	GO:0043062	extracellular structure organization	62/754	315/18614	1.15093e-25	2.0926e-24	7.43032e-25	ABL1/ADAM10/AGT/APP/AXIN2/BMP1/BMP2/CAV1/CCN2/CFLAR/CMA1/COL1A1/COL1A2/COL3A1/CST3/CTSK/DPP4/ELANE/ELN/ENG/FAP/FURIN/GREM1/HAS1/HAS2/IL6/ITGB1/ITGB3/LOX/LOXL2/LRP1/MIR29B1/MMP1/MMP10/MMP11/MMP12/MMP13/MMP14/MMP2/MMP28/MMP3/MMP7/MMP8/MMP9/NOX1/PDGFRA/PDPN/PLG/POSTN/PTX3/SERPINH1/SMAD3/SOX9/TGFB1/TGFB2/TGFBI/TGFBR1/TNF/TNFRSF1A/TNFRSF1B/VTN/WNT3A	62
GO:0045229	BP	GO:0045229	external encapsulating structure organization	62/754	317/18614	1.65038e-25	2.97175e-24	1.0552e-24	ABL1/ADAM10/AGT/APP/AXIN2/BMP1/BMP2/CAV1/CCN2/CFLAR/CMA1/COL1A1/COL1A2/COL3A1/CST3/CTSK/DPP4/ELANE/ELN/ENG/FAP/FURIN/GREM1/HAS1/HAS2/IL6/ITGB1/ITGB3/LOX/LOXL2/LRP1/MIR29B1/MMP1/MMP10/MMP11/MMP12/MMP13/MMP14/MMP2/MMP28/MMP3/MMP7/MMP8/MMP9/NOX1/PDGFRA/PDPN/PLG/POSTN/PTX3/SERPINH1/SMAD3/SOX9/TGFB1/TGFB2/TGFBI/TGFBR1/TNF/TNFRSF1A/TNFRSF1B/VTN/WNT3A	62
GO:0019058	BP	GO:0019058	viral life cycle	62/754	320/18614	2.81773e-25	5.00929e-24	1.77868e-24	ACE2/ADAR/AGTR1/AICDA/ANPEP/APCS/APOE/ATG5/AXL/BCL2/BSG/CAV1/CCL2/CCL5/CCL8/CCR5/CD209/CD28/CD4/CD80/CD86/CTSB/CTSL/CXCL8/CXCR4/DPP4/EFNB2/EGFR/FCN1/FURIN/HLA-DRB1/HMGA2/HMGB1/HSPA1A/ICAM1/IFI27/IFIH1/IFNA2/IFNB1/ISG15/ITGAV/ITGB1/ITGB3/ITGB6/LAMP1/LAMP3/LGALS1/LGALS9/MAVS/MRC1/MX1/NCAM1/PPARA/PTX3/SIGLEC1/SMPD1/TFRC/TMPRSS2/TNF/TRIM21/TSG101/ZC3H12A	62
GO:0030139	CC	GO:0030139	endocytic vesicle	62/756	347/19518	2.62788e-24	1.50775e-22	1.0719e-22	ACE2/APOA1/APOE/AREG/ATG5/B2M/BECN1/CAV1/CD163/CD207/CD4/CD9/CDC42/CFTR/CSF3/CTLA4/CTSL/CYBB/DPP4/EGF/EGFR/ELANE/EREG/FCGR1A/HBEGF/HLA-DRA/HLA-DRB1/HSP90AA1/IL7R/ITGAV/LAMP1/LPAR1/LRP1/MARCO/MDM2/MPO/MSR1/MTOR/NOD2/NOS3/OCLN/SFTPA1/SFTPA2/SFTPB/SFTPC/SFTPD/SPARC/SPHK1/SYT7/TCIRG1/TF/TFRC/TGFA/TLR2/TLR7/TLR9/VIM/WNT1/WNT3A/WNT5A/WNT7A/WNT7B	62
GO:0001664	MF	GO:0001664	G protein-coupled receptor binding	62/751	289/18369	1.27936e-27	1.13863e-25	7.79585e-26	ACE/ADM/ADORA2A/AGT/AGTR1/C3/CALCA/CCL1/CCL11/CCL13/CCL17/CCL18/CCL19/CCL2/CCL20/CCL21/CCL22/CCL24/CCL26/CCL3/CCL4/CCL5/CCL7/CCL8/CCR2/CX3CL1/CX3CR1/CXCL1/CXCL10/CXCL11/CXCL12/CXCL13/CXCL14/CXCL16/CXCL2/CXCL3/CXCL5/CXCL6/CXCL8/CXCL9/EDN1/FCN1/FPR1/GNA13/GPHA2/HSPA1A/IL2/JAK1/JAK2/MARCO/PF4/PPBP/PTH/S1PR1/S1PR2/STAT1/TYK2/WNT1/WNT3A/WNT5A/WNT7A/WNT7B	62
GO:0090287	BP	GO:0090287	regulation of cellular response to growth factor stimulus	61/754	345/18614	1.05337e-22	1.61171e-21	5.72277e-22	ABL1/ACVRL1/ADAM17/AGT/AGTR2/AXIN1/BMP2/BMP4/BMPR2/CAV1/CD63/CDH5/CFLAR/CREBBP/CTNNB1/CXCL13/DKK1/ENG/EP300/FGF1/FGF10/FGF2/FGF9/FGFR1/GATA3/GATA6/GREM1/HIF1A/HSPA1A/HSPA5/IL12B/IL17F/IL1B/IL4/ITGB3/KDR/LOX/LTBP1/MIR146A/MIR200C/MIR21/MIR29B1/NKX2-1/PPARA/PPARG/SIRT1/SMAD2/SMAD3/SMAD4/SMAD7/TGFB1/TGFB3/THBS1/TP53/TRIM33/VEGFA/VTN/WNT1/WNT5A/XIAP/ZEB1	61
GO:0001935	BP	GO:0001935	endothelial cell proliferation	60/754	201/18614	1.39658e-35	4.79808e-34	1.70368e-34	ACVRL1/ADAM17/AGTR1/AKT1/ALOX5/APOA1/APOE/ARG1/BMP2/BMP4/BMPR2/CAV1/CCL11/CCL2/CCL24/CCL26/CCR3/CD34/CXCL12/EGF/ERN1/F3/FGF10/FGF2/FGF7/FGFR1/FLT1/FUT1/HIF1A/HMGB1/HMOX1/IGF2/IL10/IL12B/ITGB3/JUN/KDR/LEP/LOXL2/MIR126/MIR146A/MIR21/MIR29A/MIR29C/MIR34A/MMP14/PDGFB/PIK3CD/PPARG/SIRT1/SPARC/STAT1/STAT3/STAT5A/TEK/TGFBR1/THBS1/TNF/VEGFA/WNT5A	60
GO:0000302	BP	GO:0000302	response to reactive oxygen species	60/754	205/18614	4.85768e-35	1.60965e-33	5.71545e-34	ABL1/AKT1/ANXA1/APOE/AREG/ARG1/AXL/BCL2/BECN1/BMP7/BTK/CASP3/CAT/CHUK/COL1A1/EDN1/EGFR/ERN1/FOS/FOSL1/HGF/HIF1A/HMOX1/IL10/IL1A/IL6/JUN/KDM6B/MAP1LC3A/MAPK1/MAPK3/MAPK8/MET/MIR21/MIR34A/MMP2/MMP9/MPO/NFE2L2/NOS3/PDGFRA/PDGFRB/PINK1/PRKCD/PTK2B/RELA/RIPK3/SCGB1A1/SDC1/SIRPA/SIRT1/SOD1/SOD2/SOD3/SPHK1/SRC/STAT1/STAT6/TNFAIP3/TXN	60
GO:0022408	BP	GO:0022408	negative regulation of cell-cell adhesion	60/754	205/18614	4.85768e-35	1.60965e-33	5.71545e-34	ABL1/ADIPOQ/ADORA2A/AKT1/ANXA1/APOA1/ARG1/BMP2/BMP4/CASP3/CCL21/CD274/CD80/CD86/CD9/CDH1/CEBPB/CTLA4/CXCL12/EPCAM/ERBB2/FCGR2B/FOXJ1/FOXP3/HLA-DRB1/HMGB1/IDO1/IFNA2/IFNB1/IL10/IL1RN/IL2/IL2RA/IL4/IL4R/IRF1/JAK2/JAK3/KLF4/LGALS3/LGALS9/MIR146A/MIR21/PLG/PPARA/PRKCD/PTK2/SCGB1A1/SDC4/SFTPD/SHH/SMAD7/SOCS1/SPI1/TBX21/TGFB1/UBASH3B/VEGFA/WNT1/ZC3H12A	60
GO:0050866	BP	GO:0050866	negative regulation of cell activation	60/754	225/18614	1.57e-32	4.53195e-31	1.60918e-31	ADORA2A/ANXA1/APOE/ARG1/AXL/BMP4/BTK/CASP3/CCR2/CD274/CD80/CD86/CD9/CEBPB/CTLA4/CX3CL1/ENPP3/ERBB2/F2/FCGR2B/FN1/FOXJ1/FOXP3/HLA-DRB1/HMGB1/HMOX1/IDO1/IFNA2/IFNB1/IL10/IL13RA2/IL2/IL2RA/IL4/IL4R/IRF1/JAK3/LGALS3/LGALS9/MERTK/MIR21/NOS3/PDGFA/PDGFB/PDGFRA/PRKCD/PTPRC/SCGB1A1/SDC4/SFTPD/SHH/SMAD7/SOCS1/SPI1/TBX21/THBD/TNFAIP3/TREM2/UBASH3B/ZC3H12A	60
GO:0007599	BP	GO:0007599	hemostasis	60/754	230/18614	5.9853e-32	1.64302e-30	5.83396e-31	ACTB/ADORA2A/ANXA5/APOE/AXL/CAV1/CD34/CD40/CD40LG/CD9/COL3A1/EDN1/EPHB2/F10/F2/F2R/F2RL1/F3/FAP/FGB/FLI1/GNA13/HPS4/HSPB1/IL6/IL6ST/ITGB3/JAK2/LCK/MAPK14/MERTK/MMRN1/NFE2L2/NOS3/PDGFA/PDGFB/PDGFRA/PDPN/PF4/PIK3CG/PLA2G4A/PLAT/PLAU/PLAUR/PLG/PRKCD/SELP/SERPINA1/SERPINE1/SHH/SRC/SRF/THBD/THBS1/TLR4/TXK/UBASH3B/VTN/VWF/WNT3A	60
GO:2001234	BP	GO:2001234	negative regulation of apoptotic signaling pathway	60/754	233/18614	1.31153e-31	3.48083e-30	1.23596e-30	AKT1/AR/BAX/BCL2/BCL2L1/BID/BMP4/CD44/CFLAR/CSF2/CTNNB1/CX3CL1/CX3CR1/CXCL12/EPO/FGB/FGF10/GSK3B/HGF/HIF1A/HMOX1/HSPA1A/HSPB1/ICAM1/IGF1/IL1A/IL1B/IL4/IL7/IL9/INS/ITGAV/LGALS3/MCL1/MDM2/MIF/MIR21/MMP9/MUC1/NFE2L2/NOS3/PDX1/PF4/PINK1/PLAUR/PTGS2/RELA/SERPINE1/SIRT1/SNAI1/SNAI2/SOD2/SRC/TERT/TGFBR1/THBS1/TNF/TNFAIP3/XBP1/YAP1	60
GO:0051607	BP	GO:0051607	defense response to virus	60/754	303/18614	5.1802e-25	9.12236e-24	3.23912e-24	ADAR/AICDA/AIM2/ATG5/BCL2/BCL2L1/BECN1/CASP1/CD207/CD40/CXCL10/CXCL9/F2RL1/FOXP3/HSP90AA1/IFI27/IFIH1/IFNA1/IFNA2/IFNB1/IFNG/IL12B/IL15/IL1B/IL21/IL23A/IL27/IL33/IL4/IL6/IRF1/IRF3/IRF5/IRF7/ISG15/ITGAX/MAVS/MMP12/MX1/MYD88/NLRP1/PARP9/PTPRC/PYCARD/RELA/RIPK3/STAT1/STAT2/STING1/TBK1/TICAM1/TLR2/TLR3/TLR7/TLR8/TLR9/TNFAIP3/TRAF3/TRIM21/ZC3H12A	60
GO:0140546	BP	GO:0140546	defense response to symbiont	60/754	304/18614	6.21419e-25	1.08073e-23	3.8374e-24	ADAR/AICDA/AIM2/ATG5/BCL2/BCL2L1/BECN1/CASP1/CD207/CD40/CXCL10/CXCL9/F2RL1/FOXP3/HSP90AA1/IFI27/IFIH1/IFNA1/IFNA2/IFNB1/IFNG/IL12B/IL15/IL1B/IL21/IL23A/IL27/IL33/IL4/IL6/IRF1/IRF3/IRF5/IRF7/ISG15/ITGAX/MAVS/MMP12/MX1/MYD88/NLRP1/PARP9/PTPRC/PYCARD/RELA/RIPK3/STAT1/STAT2/STING1/TBK1/TICAM1/TLR2/TLR3/TLR7/TLR8/TLR9/TNFAIP3/TRAF3/TRIM21/ZC3H12A	60
GO:0042326	BP	GO:0042326	negative regulation of phosphorylation	60/754	383/18614	1.26964e-19	1.53564e-18	5.45266e-19	ABL1/ADAR/ADIPOQ/ADORA2A/AGT/AKT1/ANGPT1/APC/APOE/BAX/BMP2/BMP4/BMP7/CASP3/CAV1/CDKN1A/CDKN2A/CEBPA/DKK1/DUSP1/DUSP6/ENG/EPHB2/FABP4/GREM1/HGF/HSPB1/IFNG/IGFBP3/IL1B/IL2/IRAK3/JUN/LRP1/LRP5/MIR146A/MIR34A/NUP62/OCLN/PPARA/PPARG/PRKCD/PTEN/PTPRC/PYCARD/ROCK1/SIRPA/SIRT1/SMAD7/SMPD1/SNCA/SOCS1/SOCS3/STAT3/TGFB1/THY1/TNFAIP3/TSG101/UBASH3B/ZC3H12A	60
GO:0031331	BP	GO:0031331	positive regulation of cellular catabolic process	60/754	450/18614	3.37949e-16	3.11782e-15	1.10706e-15	AKT1/AKT2/APOE/APP/ATF6/AXIN1/AXIN2/BAX/BECN1/CAV1/CEBPA/EGF/FOXO3/FURIN/GSK3A/GSK3B/HIF1A/HMGB1/HMOX1/HSPA1A/IFNB1/IFNG/IGF1/IL1B/IL33/IL4/IL6/INS/KDR/KEAP1/MAP3K7/MAPK3/MDM2/MIR146A/MTOR/NFE2L2/NOD2/P2RX7/PINK1/PPARA/PRKAA2/PRKCD/PTEN/PTK2/PTK2B/RIPK2/ROCK1/SIRT1/SMAD7/SNCA/STING1/TBK1/TFEB/TICAM1/TLR9/TNF/TNFRSF1B/TRIM21/TWIST1/ZC3H12A	60
GO:1990266	BP	GO:1990266	neutrophil migration	59/754	128/18614	9.05569e-48	6.10987e-46	2.16946e-46	BSG/C5AR1/CCL1/CCL11/CCL13/CCL17/CCL18/CCL19/CCL2/CCL20/CCL21/CCL22/CCL24/CCL26/CCL3/CCL4/CCL5/CCL7/CCL8/CCR7/CX3CL1/CXCL1/CXCL10/CXCL11/CXCL13/CXCL2/CXCL3/CXCL5/CXCL6/CXCL8/CXCL9/CXCR1/CXCR2/DPP4/EDN1/FUT4/IL1A/IL1B/IL1R1/IL23A/ITGA1/ITGB2/LGALS3/MCU/MYD88/NOD2/PECAM1/PF4/PIK3CD/PIK3CG/PLA2G1B/PPBP/PRTN3/RAC1/S100A12/S100A8/S100A9/TGFB2/TREM1	59
GO:0032635	BP	GO:0032635	interleukin-6 production	59/754	178/18614	6.83219e-38	2.73288e-36	9.70377e-37	ADORA2B/AGER/AIF1/APP/BTK/CD47/CEBPB/CX3CL1/EREG/F2R/F2RL1/FOXJ1/FOXP3/HGF/HMGB1/IFIH1/IFNG/IL10/IL17A/IL17F/IL17RA/IL1A/IL1B/IL33/IL37/IL6/IL6R/IRAK3/LEP/LGALS9/MAPKAPK2/MAVS/MIR146A/MMP8/MYD88/NOD2/NOS2/P2RX7/PTPN11/PYCARD/RIPK2/SIRPA/STAT3/TICAM1/TLR2/TLR3/TLR4/TLR7/TLR8/TLR9/TNF/TNFAIP3/TRAF6/TREM2/TSLP/TWIST1/WNT5A/XBP1/ZC3H12A	59
GO:0032675	BP	GO:0032675	regulation of interleukin-6 production	59/754	178/18614	6.83219e-38	2.73288e-36	9.70377e-37	ADORA2B/AGER/AIF1/APP/BTK/CD47/CEBPB/CX3CL1/EREG/F2R/F2RL1/FOXJ1/FOXP3/HGF/HMGB1/IFIH1/IFNG/IL10/IL17A/IL17F/IL17RA/IL1A/IL1B/IL33/IL37/IL6/IL6R/IRAK3/LEP/LGALS9/MAPKAPK2/MAVS/MIR146A/MMP8/MYD88/NOD2/NOS2/P2RX7/PTPN11/PYCARD/RIPK2/SIRPA/STAT3/TICAM1/TLR2/TLR3/TLR4/TLR7/TLR8/TLR9/TNF/TNFAIP3/TRAF6/TREM2/TSLP/TWIST1/WNT5A/XBP1/ZC3H12A	59
GO:0043405	BP	GO:0043405	regulation of MAP kinase activity	59/754	186/18614	1.14972e-36	4.32108e-35	1.53431e-35	ADIPOQ/AGER/AGT/APOE/AXIN1/BMP2/BMP4/BMP7/CAV1/CCL19/CD40/DKK1/DUSP1/EDN1/EGF/EGFR/ELANE/ERBB2/ERN1/FGF1/FGF2/FGFR1/FLT1/FLT3/IL1B/IRAK3/KIT/KITLG/MAP2K6/MAP2K7/MAP3K7/MIF/NOD2/NOX4/NUP62/P2RX7/PDGFA/PDGFB/PDGFRB/PIK3CG/PLA2G1B/PPARG/PRKCD/PTK2B/PTPRC/S100A12/SMPD1/SRC/TGFA/TGFB1/THBS1/TLR4/TLR9/TNF/TNFSF11/TRAF6/TSG101/VEGFA/WNT5A	59
GO:0051896	BP	GO:0051896	regulation of protein kinase B signaling	59/754	186/18614	1.14972e-36	4.32108e-35	1.53431e-35	ANGPT1/AXL/CCL19/CCL21/CCL3/CCR7/CD28/CHI3L1/CSF3/CX3CL1/CX3CR1/DDIT3/EGF/EGFR/ENG/F10/F3/FGF2/FGFR1/GATA3/GDF15/HBEGF/HSP90AA1/IGF1/IGF1R/IGF2/IGFBP5/IL18/INS/ITGB1/LEP/MIR126/MIR145/MIR146A/MIR200C/MIR21/MIR29A/MIR29B1/MIR29C/MIR34A/MTOR/NOX4/OSM/PDGFA/PIK3CD/PIK3CG/PINK1/PPARA/PTEN/PTK2/SIRT1/SRC/TEK/TGFB1/TGFBR1/THBS1/TNF/TNFSF11/TXN	59
GO:0007596	BP	GO:0007596	blood coagulation	59/754	224/18614	1.11018e-31	3.00338e-30	1.06643e-30	ACTB/ADORA2A/ANXA5/APOE/AXL/CAV1/CD34/CD40/CD40LG/CD9/COL3A1/EDN1/EPHB2/F10/F2/F2R/F2RL1/F3/FAP/FGB/GNA13/HPS4/HSPB1/IL6/IL6ST/ITGB3/JAK2/LCK/MAPK14/MERTK/MMRN1/NFE2L2/NOS3/PDGFA/PDGFB/PDGFRA/PDPN/PF4/PIK3CG/PLA2G4A/PLAT/PLAU/PLAUR/PLG/PRKCD/SELP/SERPINA1/SERPINE1/SHH/SRC/SRF/THBD/THBS1/TLR4/TXK/UBASH3B/VTN/VWF/WNT3A	59
GO:0050817	BP	GO:0050817	coagulation	59/754	229/18614	4.1395e-31	1.06336e-29	3.77572e-30	ACTB/ADORA2A/ANXA5/APOE/AXL/CAV1/CD34/CD40/CD40LG/CD9/COL3A1/EDN1/EPHB2/F10/F2/F2R/F2RL1/F3/FAP/FGB/GNA13/HPS4/HSPB1/IL6/IL6ST/ITGB3/JAK2/LCK/MAPK14/MERTK/MMRN1/NFE2L2/NOS3/PDGFA/PDGFB/PDGFRA/PDPN/PF4/PIK3CG/PLA2G4A/PLAT/PLAU/PLAUR/PLG/PRKCD/SELP/SERPINA1/SERPINE1/SHH/SRC/SRF/THBD/THBS1/TLR4/TXK/UBASH3B/VTN/VWF/WNT3A	59
GO:0048762	BP	GO:0048762	mesenchymal cell differentiation	59/754	255/18614	2.19767e-28	4.67946e-27	1.66156e-27	AXIN2/BCL2/BMP2/BMP4/BMP7/CDC42/CDH2/COL1A1/CTNNB1/EDN1/EDNRA/ENG/FGF10/FGFR1/FGFR2/FN1/GATA3/GREM1/GSK3B/HAS2/HGF/HIF1A/HMGA2/IGF1/IL1B/IL6/KITLG/LEF1/LOXL2/MAPK1/MAPK3/MIR145/MIR21/MIR29B1/MTOR/NKX2-1/PDPN/PITX2/PTEN/PTK2/ROCK1/S100A4/SEMA7A/SHH/SMAD2/SMAD3/SMAD4/SMAD7/SNAI1/SNAI2/SOX9/STAT1/TGFB1/TGFB2/TGFB3/TGFBR1/TGFBR2/TWIST1/WNT5A	59
GO:0001701	BP	GO:0001701	in utero embryonic development	59/754	398/18614	3.92334e-18	4.21703e-17	1.49736e-17	ACVRL1/ADAM10/ADM/AKT1/ANGPT1/AR/AXIN1/BCL2L1/BMP2/BMP7/CASP8/CEBPA/CEBPB/COL3A1/CSF2/CTNNB1/EDN1/EDNRA/EGFR/FGFR2/FOSL1/FURIN/GATA3/GATA6/GNA13/HIF1A/IGF1/IGF2/IL10/ITGB1/JUNB/KEAP1/KLF4/KRT19/KRT8/LEF1/LIF/MAP2K1/MAPK1/NOS3/PDGFB/PDGFRA/SMAD2/SMAD3/SMAD4/SNAI1/SOCS3/SRF/TFEB/TGFB3/TGFBR1/TGFBR2/TP53/TRAF6/TWIST1/VEGFA/WNT3A/WNT7B/YAP1	59
GO:0010959	BP	GO:0010959	regulation of metal ion transport	59/754	423/18614	7.30316e-17	7.08799e-16	2.51677e-16	ABL1/ACE/ADORA2A/AGT/AKT1/ATF4/ATG5/B2M/BAX/BCL2/CAV1/CCL2/CCL3/CCL4/CCL5/CCR1/CD19/CD4/CD63/CTNNB1/CX3CL1/CXCL10/CXCL11/CXCL12/CXCL9/CXCR4/EGF/EPO/F2/F2R/GRP/IFNG/IL13/ITGB1/ITGB3/JAK3/KCNMB1/LGALS3/MIR200C/MIR21/MIR29B1/MIR34A/MS4A1/NOS3/P2RX7/PDGFB/PDGFRB/PIK3CG/PLA2G1B/PTGS2/PTK2B/RHOA/RRAD/SNCA/TF/THY1/TLR9/TREM2/UBASH3B	59
GO:1902107	BP	GO:1902107	positive regulation of leukocyte differentiation	58/754	184/18614	6.89566e-36	2.42866e-34	8.62357e-35	ACTB/AGER/ANXA1/AXL/BTK/CASP8/CCL19/CCR1/CD27/CD4/CD80/CD86/CREB1/CSF1/FOS/FOXO3/FOXP3/GATA3/GLI2/HLA-DRA/HLA-DRB1/HMGB1/IFNG/IL10/IL12B/IL15/IL17A/IL18/IL2/IL23A/IL2RA/IL4/IL4R/IL5/IL7/IL7R/KITLG/LEF1/LGALS9/LIF/MIR145/MIR21/MMP14/NLRP3/PF4/PTPRC/RHOA/RIPK2/SHH/SOCS1/SPI1/TGFB1/TGFBR2/TNF/TNFSF11/TRAF6/TREM2/XBP1	58
GO:1903708	BP	GO:1903708	positive regulation of hemopoiesis	58/754	184/18614	6.89566e-36	2.42866e-34	8.62357e-35	ACTB/AGER/ANXA1/AXL/BTK/CASP8/CCL19/CCR1/CD27/CD4/CD80/CD86/CREB1/CSF1/FOS/FOXO3/FOXP3/GATA3/GLI2/HLA-DRA/HLA-DRB1/HMGB1/IFNG/IL10/IL12B/IL15/IL17A/IL18/IL2/IL23A/IL2RA/IL4/IL4R/IL5/IL7/IL7R/KITLG/LEF1/LGALS9/LIF/MIR145/MIR21/MMP14/NLRP3/PF4/PTPRC/RHOA/RIPK2/SHH/SOCS1/SPI1/TGFB1/TGFBR2/TNF/TNFSF11/TRAF6/TREM2/XBP1	58
GO:0010721	BP	GO:0010721	negative regulation of cell development	58/754	286/18614	9.13986e-25	1.57487e-23	5.59196e-24	ADIPOQ/ANXA1/APCS/B2M/BMP4/BMP7/CCL11/CCL3/CDH1/CEBPA/CTLA4/CTNNB1/EPHB2/ERBB2/F2/FCGR2B/FOXJ1/FOXP3/GSK3A/GSK3B/HMGB1/IFNA2/IFNB1/IGF1/IL1A/IL1B/IL2/IL4/IL4R/IL6/IRF1/JAK3/MAFB/MIR146A/MIR21/MIR29B1/MYC/PIK3R1/PTEN/SEMA7A/SHH/SMAD7/SNAI2/SOCS1/SPP1/TBX21/THY1/TLR3/TLR4/TNF/TP53/TREM2/UBASH3B/VEGFA/WNT3A/WNT5A/WNT7A/ZC3H12A	58
GO:0048608	BP	GO:0048608	reproductive structure development	58/754	301/18614	1.3988e-23	2.23808e-22	7.94686e-23	A2M/ACE/ANXA1/AR/ATN1/AXL/BAX/BCL2/BCL2L1/BMP4/BMP7/C3/CASP3/CCND1/CEBPB/CTNNB1/EREG/ESR1/FGF10/FGF9/FGFR2/GATA3/GATA6/GLI1/HSPA5/IL1A/KDR/KIT/KITLG/LEP/MERTK/MMP14/MMP2/NKX2-1/NOS3/PDGFA/PDGFRA/PDGFRB/PTPN11/PTX3/REN/SDC1/SHH/SIRT1/SMAD4/SOD1/SOX9/SRC/TGFB2/TGFBR1/TLR3/TLR9/TNC/TNFSF10/TP63/VEGFA/WNT5A/WNT7A	58
GO:0061458	BP	GO:0061458	reproductive system development	58/754	305/18614	2.80719e-23	4.40344e-22	1.56355e-22	A2M/ACE/ANXA1/AR/ATN1/AXL/BAX/BCL2/BCL2L1/BMP4/BMP7/C3/CASP3/CCND1/CEBPB/CTNNB1/EREG/ESR1/FGF10/FGF9/FGFR2/GATA3/GATA6/GLI1/HSPA5/IL1A/KDR/KIT/KITLG/LEP/MERTK/MMP14/MMP2/NKX2-1/NOS3/PDGFA/PDGFRA/PDGFRB/PTPN11/PTX3/REN/SDC1/SHH/SIRT1/SMAD4/SOD1/SOX9/SRC/TGFB2/TGFBR1/TLR3/TLR9/TNC/TNFSF10/TP63/VEGFA/WNT5A/WNT7A	58
GO:0043254	BP	GO:0043254	regulation of protein-containing complex assembly	58/754	409/18614	6.23868e-17	6.1078e-16	2.16873e-16	ABCA3/ABL1/APOE/BAX/BID/BTK/CCL11/CCL21/CCL24/CCL26/CCR7/CDC42/CDH5/CSF2/CSF3/CXCL13/DKK1/ELN/EP300/ESR1/GSK3B/HMGB1/HSP90AA1/HSPA1A/HSPA5/IFNG/IL5/ISG15/LGALS3/MAPK8/MAVS/MECP2/MET/MMP1/MMP3/MTOR/MYD88/OCLN/PARP1/PINK1/PRKCD/PTK2B/PTPN11/PYCARD/RAC1/RHOA/SELP/SNCA/SOX9/SRC/TFRC/TGFB1/TICAM1/TLR4/TNF/TP53/TREM2/VEGFA	58
GO:0022411	BP	GO:0022411	cellular component disassembly	58/754	488/18614	1.76202e-13	1.28985e-12	4.57992e-13	ADAM10/APC/ATG5/BAX/BECN1/C1QA/C3/CMA1/CST3/CTSK/CX3CL1/CX3CR1/DKK1/DPP4/ELANE/F2RL1/FAP/FURIN/GSK3A/GSK3B/HIF1A/IGF1R/IL6/IRAK3/ITGAM/ITGB1/LRP1/MAP1LC3A/MAP1LC3B/MIR146A/MMP1/MMP10/MMP11/MMP12/MMP13/MMP14/MMP2/MMP3/MMP7/MMP8/MMP9/MYC/PDPN/PIK3R1/PINK1/PLG/PRKAA2/SNAI2/SQSTM1/STING1/TAFAZZIN/TGFB1/TGFB3/TGFBR1/TNF/TP53/TREM2/TSG101	58
GO:0010876	BP	GO:0010876	lipid localization	58/754	497/18614	3.85414e-13	2.71829e-12	9.65197e-13	ABCA3/ACE/ADIPOQ/AGT/AGTR1/AKT1/AKT2/ANGPTL3/ANXA1/APOA1/APOE/C3/CAV1/CFTR/CRP/EDN1/EGF/FABP4/FASLG/FURIN/IL1A/IL1B/IL6/ITGAV/ITGB3/LEP/LRP1/MAP2K6/MIF/MIR146A/MIR34A/MSR1/NFKB1/NFKBIA/NOS2/P2RX7/PLA2G1B/PLA2G4A/PLA2G4C/PPARA/PPARG/PRKCD/PTGS2/PTPN11/REN/RXRA/SFTPA1/SHH/SIRT1/SLC2A1/SPP1/STAR/SYT7/THBS1/TNF/TNFSF11/TREM2/ZC3H12A	58
GO:0005925	CC	GO:0005925	focal adhesion	58/756	422/19518	3.70709e-17	1.41796e-15	1.00807e-15	ACTB/ADAM10/ADAM17/ANXA1/ANXA5/B2M/BCAR1/BSG/CAT/CAV1/CD44/CD9/CDC42/CDH2/CTNNB1/DPP4/EFNB2/EGFR/ENG/FAP/FAT1/FLT1/GNA13/HSPA1A/HSPA5/HSPB1/ICAM1/IL1RL1/ITGA1/ITGAV/ITGB1/ITGB2/ITGB3/ITGB6/JAK1/JAK2/KRAS/LRP1/MAP2K1/MAPK1/MAPK3/MMP14/NOX4/PDGFRB/PLAU/PLAUR/PTK2/PTK2B/PTPRC/RAC1/RHOA/SDC4/SRC/TEK/THY1/TNC/TNFSF13B/VIM	58
GO:0030055	CC	GO:0030055	cell-substrate junction	58/756	432/19518	1.10714e-16	3.90907e-15	2.77906e-15	ACTB/ADAM10/ADAM17/ANXA1/ANXA5/B2M/BCAR1/BSG/CAT/CAV1/CD44/CD9/CDC42/CDH2/CTNNB1/DPP4/EFNB2/EGFR/ENG/FAP/FAT1/FLT1/GNA13/HSPA1A/HSPA5/HSPB1/ICAM1/IL1RL1/ITGA1/ITGAV/ITGB1/ITGB2/ITGB3/ITGB6/JAK1/JAK2/KRAS/LRP1/MAP2K1/MAPK1/MAPK3/MMP14/NOX4/PDGFRB/PLAU/PLAUR/PTK2/PTK2B/PTPRC/RAC1/RHOA/SDC4/SRC/TEK/THY1/TNC/TNFSF13B/VIM	58
GO:0046631	BP	GO:0046631	alpha-beta T cell activation	57/754	175/18614	3.66287e-36	1.32336e-34	4.69892e-35	ABL1/ADORA2A/AGER/ANXA1/BCL2/CCL19/CCR2/CD274/CD28/CD80/CD86/CTSL/FOXP3/GATA3/HLA-DRA/HLA-DRB1/HMGB1/IFNG/IL12B/IL15/IL18/IL2/IL21/IL23A/IL27/IL2RA/IL4/IL4R/IL6/IL6R/INS/IRF1/IRF4/ITK/JAK2/JAK3/JUNB/LEF1/LGALS9/MIR21/MTOR/MYB/NLRP3/PTPRC/RHOA/RIPK2/RORC/SHH/SMAD7/SOCS1/STAT3/STAT6/TBX21/TCIRG1/TGFBR2/TYK2/ZC3H12A	57
GO:0001894	BP	GO:0001894	tissue homeostasis	57/754	263/18614	6.70699e-26	1.24781e-24	4.43067e-25	ACTB/ALB/ANGPT1/B2M/BAX/BCL2/CALCA/CCN2/CD34/CD38/CDH5/COL3A1/CSF1/CSF1R/CTNNB1/CTSK/F2R/HSPB1/IL17A/IL6/IL7/ITGB1/ITGB3/KRAS/LYZ/NOD2/NOS3/NOX4/OCLN/P2RX7/PECAM1/POTEF/PROM1/PTGS2/PTH/PTK2B/PTPN11/S1PR1/SLC2A1/SOD1/SOX9/SPP1/SRC/SRF/TCIRG1/TF/TFRC/TJP1/TLR4/TLR9/TNFAIP3/TNFSF11/TRAF6/UBASH3B/VEGFA/XIAP/YAP1	57
GO:0060249	BP	GO:0060249	anatomical structure homeostasis	57/754	263/18614	6.70699e-26	1.24781e-24	4.43067e-25	ACTB/ALB/ANGPT1/B2M/BAX/BCL2/CALCA/CCN2/CD34/CD38/CDH5/COL3A1/CSF1/CSF1R/CTNNB1/CTSK/F2R/HSPB1/IL17A/IL6/IL7/ITGB1/ITGB3/KRAS/LYZ/NOD2/NOS3/NOX4/OCLN/P2RX7/PECAM1/POTEF/PROM1/PTGS2/PTH/PTK2B/PTPN11/S1PR1/SLC2A1/SOD1/SOX9/SPP1/SRC/SRF/TCIRG1/TF/TFRC/TJP1/TLR4/TLR9/TNFAIP3/TNFSF11/TRAF6/UBASH3B/VEGFA/XIAP/YAP1	57
GO:0018209	BP	GO:0018209	peptidyl-serine modification	57/754	327/18614	5.71273e-21	7.70875e-20	2.73719e-20	AKT1/AKT2/ANGPT1/APP/AXIN1/BAX/BCL2/BGN/CAV1/CD44/CHUK/CSF3/DKK1/EGFR/EIF2AK3/EPO/ERN1/GSK3A/GSK3B/HGF/HSP90AA1/IFNA1/IFNA2/IFNB1/IFNG/IL11/IL24/IL6/LIF/MAPK1/MAPK14/MAPK8/MAPKAPK2/MIF/MTOR/NGF/OSM/PDGFB/PINK1/PRKCD/PTEN/PTGS2/RIPK2/ROCK1/SMAD7/SNCA/SRC/TBK1/TFRC/TGFB1/TGFBR1/TGFBR2/TNF/TXN/VEGFA/WNT3A/WNT5A	57
GO:0055074	BP	GO:0055074	calcium ion homeostasis	57/754	327/18614	5.71273e-21	7.70875e-20	2.73719e-20	ABL1/ADM/APOE/APP/ATF4/ATG5/BAX/BCL2/CALCA/CAV1/CCL1/CCL11/CCL13/CCL19/CCL21/CCL3/CCL5/CCL7/CCL8/CCR1/CCR2/CCR5/CCR7/CD19/CD40/CDH5/CX3CL1/CXCL10/CXCL11/CXCL12/CXCL9/DDIT3/EDN1/EDNRA/ELANE/F2/F2R/FASLG/FGF2/IL13/ITGB3/KDR/KL/LCK/MCU/NT5E/P2RX7/PTH/PTK2B/PTPRC/SNCA/TCIRG1/THY1/TNFSF11/UBASH3B/WNT5A/XK	57
GO:0001933	BP	GO:0001933	negative regulation of protein phosphorylation	57/754	341/18614	4.58877e-20	5.84025e-19	2.07373e-19	ABL1/ADAR/ADIPOQ/ADORA2A/AGT/AKT1/ANGPT1/APC/APOE/BAX/BMP2/BMP4/BMP7/CASP3/CAV1/CDKN1A/CDKN2A/CEBPA/DKK1/DUSP1/DUSP6/ENG/EPHB2/FABP4/GREM1/HGF/HSPB1/IFNG/IGFBP3/IL1B/IL2/IRAK3/JUN/LRP1/LRP5/MIR146A/MIR34A/NUP62/OCLN/PPARG/PRKCD/PTEN/PTPRC/PYCARD/SIRPA/SIRT1/SMAD7/SMPD1/SNCA/SOCS1/SOCS3/TGFB1/THY1/TNFAIP3/TSG101/UBASH3B/ZC3H12A	57
GO:0005788	CC	GO:0005788	endoplasmic reticulum lumen	57/756	312/19518	6.3976e-23	3.26278e-21	2.3196e-21	ACE2/ADAM10/ADAM17/ALB/APOA1/APOE/APP/B2M/BMP4/C3/CD4/CDH2/COL1A1/COL1A2/COL3A1/CSF1/CST3/EDN1/F10/F2/FLT3/FN1/HSPA5/IGFBP1/IGFBP3/IGFBP5/IL12B/IL23A/IL27/IL6/INS/LGALS1/LTBP1/MAPK1/MAPK3/MFGE8/MZB1/PDGFA/PDGFB/PLAUR/PTGS2/SDC2/SERPINA1/SERPINH1/SHH/SPP1/TF/THBS1/TIMP1/TNC/VCAN/VTN/WNT1/WNT3A/WNT5A/WNT7A/WNT7B	57
GO:0045580	BP	GO:0045580	regulation of T cell differentiation	56/754	180/18614	2.44652e-34	7.82887e-33	2.77984e-33	ABL1/ACTB/ANXA1/BMP4/CCL19/CCR2/CD2/CD27/CD28/CD80/CD86/CTLA4/DROSHA/ERBB2/FOXJ1/FOXO3/FOXP3/GATA3/GLI2/HLA-DRA/HLA-DRB1/HMGB1/IFNA2/IFNB1/IFNG/IL12B/IL15/IL18/IL2/IL23A/IL27/IL2RA/IL4/IL4R/IL7/IL7R/IRF1/IRF4/JAK3/JUNB/LEF1/LGALS9/MIR21/NLRP3/PTPRC/RHOA/RIPK2/SHH/SMAD7/SOCS1/SOD1/TBX21/TGFBR2/XBP1/ZC3H12A/ZEB1	56
GO:0071902	BP	GO:0071902	positive regulation of protein serine/threonine kinase activity	56/754	195/18614	2.80211e-32	7.96538e-31	2.82831e-31	ADAM17/ADIPOQ/AGER/AKT1/AXIN1/CCL19/CCND1/CD40/CSF1R/DKK1/EDN1/EGF/EGFR/ELANE/ERBB2/ERN1/FGF1/FGF2/FGFR1/FLT1/FLT3/HMGA2/IFNG/IL1B/KIT/KITLG/MAP2K1/MAP2K6/MAP2K7/MAP3K7/MIF/NOD2/NOX4/P2RX7/PDGFA/PDGFB/PDGFRB/PIK3CG/PLA2G1B/PTK2B/PTPRC/RHOA/S100A12/SIRT1/SNCA/SRC/TGFA/TGFB1/THBS1/TLR4/TLR9/TNF/TNFSF11/TRAF6/VEGFA/WNT5A	56
GO:0007160	BP	GO:0007160	cell-matrix adhesion	56/754	239/18614	2.74569e-27	5.47184e-26	1.94292e-26	ABL1/ACVRL1/ANGPTL3/BCL2/CCL21/CCN2/CCR7/CD34/CD44/CD63/CDH11/CDKN2A/COL3A1/CSF1/CTNNB1/CX3CL1/FGB/FN1/FUT1/GREM1/GSK3B/ITGA1/ITGAE/ITGAL/ITGAM/ITGAV/ITGAX/ITGB1/ITGB2/ITGB3/ITGB6/KDR/LYVE1/MIR29C/MMP12/MMP14/PIK3R1/PLAU/PTEN/PTK2/PTK2B/RAC1/RHOA/ROCK1/SDC4/SERPINE1/SIGLEC1/SMAD3/SRC/SRF/TEK/THBS1/THY1/VCAM1/VEGFA/VTN	56
GO:0071375	BP	GO:0071375	cellular response to peptide hormone stimulus	56/754	308/18614	1.57873e-21	2.22692e-20	7.90724e-21	ADIPOQ/AGT/AGTR1/AGTR2/AKT1/AKT2/APC/ARG1/BCAR1/CA2/CAV1/CFLAR/CTSD/EDN1/EDNRA/FOS/GDF15/GPT/GSK3A/GSK3B/HDAC9/IGF1R/IGF2/IGFBP1/IL1B/INS/ITGB3/JAK2/JAK3/LEP/MAPK1/MAPK3/MIR145/MZB1/NFE2L2/NFKB1/PARP1/PIK3R1/PLA2G1B/PLAT/PPARG/PRKCD/PTK2/PTPN11/RELA/ROCK1/SIRT1/SOCS1/SOCS3/SRC/STAT1/STAT3/STAT5A/STAT6/WNT1/XBP1	56
GO:0018105	BP	GO:0018105	peptidyl-serine phosphorylation	56/754	309/18614	1.85622e-21	2.60522e-20	9.25049e-21	AKT1/AKT2/ANGPT1/APP/AXIN1/BAX/BCL2/CAV1/CD44/CHUK/CSF3/DKK1/EGFR/EIF2AK3/EPO/ERN1/GSK3A/GSK3B/HGF/HSP90AA1/IFNA1/IFNA2/IFNB1/IFNG/IL11/IL24/IL6/LIF/MAPK1/MAPK14/MAPK8/MAPKAPK2/MIF/MTOR/NGF/OSM/PDGFB/PINK1/PRKCD/PTEN/PTGS2/RIPK2/ROCK1/SMAD7/SNCA/SRC/TBK1/TFRC/TGFB1/TGFBR1/TGFBR2/TNF/TXN/VEGFA/WNT3A/WNT5A	56
GO:0051047	BP	GO:0051047	positive regulation of secretion	56/754	317/18614	6.61011e-21	8.83452e-20	3.13692e-20	ADORA2A/ADORA2B/AGT/ATG5/BMP2/CD38/CFTR/CREB1/CXCL12/EDN1/F2/F2RL1/FGB/GRP/HIF1A/HLA-DRB1/IFNG/IGF1/IL13/IL1A/IL1B/IL4/IL4R/INS/ITGAM/ITGB2/JAK2/LAMP1/LEP/MAP2K6/MCU/MIF/NPPB/P2RX7/PDX1/PINK1/PLA2G1B/PLA2G4A/PPARG/PTPN11/S100A8/SDC1/SDC4/SMAD4/SNCA/SPP1/SYT7/TGFB1/TGFB2/TGFB3/TLR2/TLR4/TNFSF11/TREM2/TSG101/XBP1	56
GO:0002768	BP	GO:0002768	immune response-regulating cell surface receptor signaling pathway	56/754	329/18614	4.09882e-20	5.25249e-19	1.86503e-19	ABL1/BAX/BCAR1/BCL2/BTK/C5AR1/CCR7/CD14/CD19/CD28/CD38/CD40/CD47/CD79A/CD8A/CREBBP/CTLA4/EP300/F2RL1/FCGR1A/FCGR2B/FCGR3A/FCN1/FOXP3/FPR1/GATA3/HLA-DRB1/IGHE/ITK/KIT/LCK/LGALS3/MAP2K7/MAP3K7/MAPK1/MAPK8/MIR146A/MIR34A/MS4A1/NFKB1/NFKBIA/NOD2/PIK3CD/PRKCD/PTK2/PTPRC/RELA/RIPK2/SRC/THY1/TLR4/TNFAIP3/TRAF6/TREM2/TXK/ZC3H12A	56
GO:0062012	BP	GO:0062012	regulation of small molecule metabolic process	56/754	331/18614	5.5063e-20	6.93069e-19	2.46092e-19	ADIPOQ/ADM/ADORA2B/AKT1/AKT2/ANXA1/APOA1/APOE/APP/BMP2/CAV1/EGR1/EP300/FGF1/GPT/GSK3A/HIF1A/IFNG/IGF1/IGF2/IGFBP3/IL1B/IL4/INS/KIT/LEP/MIR21/MTOR/NFKB1/NOS2/NOS3/NR3C1/P2RX7/PARP1/PINK1/PPARA/PPARGC1A/PRKAA2/PTGS2/PTH/PTK2B/RORC/SIRT1/SNAI1/SNAI2/SNCA/SOD1/SOX9/SRC/STAR/STAT3/TAFAZZIN/TNF/TP53/TREM2/TWIST1	56
GO:0034329	BP	GO:0034329	cell junction assembly	56/754	444/18614	3.82986e-14	2.98292e-13	1.05916e-13	ABL1/ACE/ACE2/ACTB/ACVRL1/AGT/APC/APP/BCL2/CAV1/CD9/CDC42/CDH1/CDH11/CDH2/CDH5/CLDN4/CTNNB1/DKK1/DNER/EFNB2/EPHB2/FN1/GREM1/IL17A/IL1B/ITGB3/KDR/MECP2/MMP14/OCLN/PECAM1/PTEN/PTK2/PTK2B/RAC1/RHOA/ROCK1/SDC4/SMAD3/SMAD7/SNAI1/SNAI2/SNCA/SRC/SRF/TEK/THBS1/THY1/TJP1/TLR2/TNF/VEGFA/WNT3A/WNT5A/WNT7A	56
GO:0051960	BP	GO:0051960	regulation of nervous system development	56/754	461/18614	1.88533e-13	1.37472e-12	4.88129e-13	ACE/AKT1/B2M/BMP2/BMP7/BMPR2/CCL11/CDH1/CTNNB1/CX3CL1/CX3CR1/CXCL12/CXCR4/DKK1/EIF2AK3/EPHB2/F2/FGF2/FN1/FZD3/HGF/HIF1A/IFNG/IL1B/IL33/IL6/IL6ST/ITGAX/ITGB1/KIT/KRAS/LEF1/LIF/MAP2K1/MECP2/MIR146A/MTOR/NGF/PLXNA2/PTEN/SEMA7A/SHH/SPP1/SRF/TGFB1/THY1/TLR2/TNF/TNFRSF1B/TP53/TREM2/VEGFA/WNT3A/WNT5A/WNT7A/YAP1	56
GO:0001936	BP	GO:0001936	regulation of endothelial cell proliferation	55/754	185/18614	1.37825e-32	3.99906e-31	1.41997e-31	ACVRL1/ADAM17/AGTR1/AKT1/ALOX5/APOE/ARG1/BMP2/BMP4/BMPR2/CAV1/CCL11/CCL2/CCL24/CCL26/CCR3/CXCL12/EGF/F3/FGF10/FGF2/FGF7/FGFR1/FLT1/FUT1/HIF1A/HMGB1/HMOX1/IGF2/IL10/IL12B/ITGB3/JUN/KDR/LEP/MIR126/MIR146A/MIR21/MIR29A/MIR29C/MIR34A/PDGFB/PIK3CD/PPARG/SIRT1/SPARC/STAT1/STAT3/STAT5A/TEK/TGFBR1/THBS1/TNF/VEGFA/WNT5A	55
GO:0043523	BP	GO:0043523	regulation of neuron apoptotic process	55/754	219/18614	1.88117e-28	4.03623e-27	1.43316e-27	ABL1/ADORA2A/ANGPT1/APOE/ATF4/AXL/BAX/BCL2/BCL2L1/CASP3/CASP9/CCL2/CCL3/CCND1/CEBPB/CTNNB1/CX3CL1/CX3CR1/DDIT3/F2R/FASLG/FOXO3/GATA3/GSK3A/HIF1A/HMOX1/IL10/IL6ST/ITGA1/ITGAM/JAK2/JUN/KDR/KRAS/LGMN/MAP2K7/MCL1/MECP2/NGF/NR3C1/PARP1/PINK1/PPARGC1A/PTK2B/RHOA/ROCK1/SNCA/SOD1/SOD2/TERT/TGFB2/TGFB3/TNF/TP53/TREM2	55
GO:2000116	BP	GO:2000116	regulation of cysteine-type endopeptidase activity	55/754	234/18614	6.84765e-27	1.3455e-25	4.77755e-26	ADORA2A/AIM2/AKT1/BAX/BBC3/BID/CASP1/CASP8/CASP9/CCN2/CD27/CD44/CST3/CTSD/CYCS/EIF2AK3/F2R/F3/FAS/FASLG/HGF/HMGB1/IL9/JAK2/KLF4/LAMP3/LCK/LGALS9/LGMN/MMP9/MYC/NLRC4/NLRP1/NLRP3/PLAUR/PPARG/PTGS2/PYCARD/RHOA/RIPK2/S100A8/S100A9/SIRT1/SMAD3/SNCA/SOX2/SRC/THBS1/TNF/TNFSF10/TNFSF14/TP63/VEGFA/WNT3A/XIAP	55
GO:0072593	BP	GO:0072593	reactive oxygen species metabolic process	55/754	237/18614	1.35452e-26	2.60664e-25	9.25552e-26	ACE2/AGT/AGTR1/ALOX5/ATG5/BCL2/BECN1/BMP7/CAT/CCN2/CDKN1A/CFLAR/CRP/CYBB/EDN1/F2/F2RL1/FOXM1/HIF1A/INS/ITGAM/ITGB2/LEP/MAPK14/MIR21/MMP3/MMP8/MPO/NFE2L2/NOS2/NOS3/NOX1/NOX4/P2RX7/PDGFB/PDGFRB/PINK1/PPARA/PRKCD/PTK2B/RAC1/RHOA/RIPK3/SFTPD/SNCA/SOD1/SOD2/SOD3/TGFB1/TGFBR2/THBS1/TLR4/TNF/TP53/ZC3H12A	55
GO:0003012	BP	GO:0003012	muscle system process	55/754	452/18614	2.91382e-13	2.0813e-12	7.39019e-13	ACE2/ACTA1/ADORA2B/AGT/AIF1/BECN1/CALCA/CAV1/CCN2/CD38/CFLAR/CXCR4/DES/EDN1/EDNRA/F2R/FOXO3/GATA6/GSK3A/HMOX1/HSP90AA1/IGF1/IGFBP5/IL15/IL1B/IL6ST/KIT/LEP/LTB4R/MAP2K6/MIR145/MIR200C/MIR21/MTOR/MYH14/NOS3/PARP1/PIK3CG/PPARA/PPARG/PTGS2/RHOA/ROCK1/SMAD3/SMAD4/SMAD7/SOD1/SPHK1/SRF/TAFAZZIN/TNF/TNFRSF1A/TNFRSF1B/YY1/ZC3H12A	55
GO:0061564	BP	GO:0061564	axon development	55/754	479/18614	3.08285e-12	1.99353e-11	7.07853e-12	ABL1/APOE/APP/B3GNT2/BCL2/BMP7/BMPR2/CASP3/CDH1/CDH11/CDH2/CREB1/CSF1R/CXCL12/ECE1/EDN1/EDNRA/EFNB2/EPHB2/ERBB2/FGFR2/FN1/FZD3/GATA3/GLI2/GSK3B/HSP90AA1/IGF1R/ITGB1/JAK2/JUN/KLF4/MAP2K1/MMP2/NCAM1/NGF/NKX2-1/PLXNA2/PTEN/PTK2/PTPN11/RAC1/S100B/SEMA7A/SHH/SMAD4/SPP1/SRF/THY1/TNC/VEGFA/WNT3A/WNT5A/WNT7A/XK	55
GO:0023061	BP	GO:0023061	signal release	55/754	483/18614	4.29698e-12	2.72515e-11	9.67633e-12	ADIPOQ/ADM/ADORA2A/AGT/AGTR1/ALOX5/ANXA1/BTK/CCL5/CD38/CFTR/CREB1/CXCL12/EDN1/F2/F2R/F2RL1/FGB/GATA3/GRP/HIF1A/HLA-DRB1/IFNG/IL11/IL1A/IL1B/IL1RN/IL6/INS/JAK2/LEP/LIF/LRP5/MAP2K6/MCU/MIF/NOS2/OSM/P2RX7/PDX1/PINK1/PLA2G4A/PPARG/PTGS2/PTPN11/REN/SMAD2/SMAD4/SNCA/SPP1/SYT7/TCIRG1/TNF/TNFSF11/WNT7A	55
GO:1903034	BP	GO:1903034	regulation of response to wounding	54/754	170/18614	1.14084e-33	3.54929e-32	1.26027e-32	ACTA2/ALOX5/ANXA1/APCS/APOE/CAV1/CCN4/CD34/CD9/CLDN4/CXCR4/EDN1/EPHB2/F2/F2R/F2RL1/F3/FAP/FGB/FGF2/HBEGF/IGF1R/IL10/ITGB1/KLF4/MAP2K1/MIR21/MIR29A/MIR34A/MMRN1/MTOR/NFE2L2/NOS3/OCLN/PDGFA/PDGFB/PDGFRA/PLAT/PLAU/PLAUR/PLG/PRKCD/PTEN/PTK2/SERPINE1/SMAD3/SPP1/THBD/THBS1/TNF/TNFAIP3/UBASH3B/VTN/XBP1	54
GO:0048015	BP	GO:0048015	phosphatidylinositol-mediated signaling	54/754	172/18614	2.25297e-33	6.78315e-32	2.40853e-32	AGT/AKT1/ANGPT1/BECN1/CAT/CCL5/CD28/CSF1R/CSF3/EDN1/EGF/EGFR/ERBB2/F2/F2R/F2RL1/FCGR3A/FGF2/FGFR1/FLT1/FLT3/FN1/GATA3/HGF/IGF1/IGF1R/IL18/INS/JAK2/KDR/KIT/LEP/MIR126/MIR21/MUC5AC/OSM/PDGFA/PDGFB/PDGFRA/PDGFRB/PIK3CD/PIK3CG/PIK3R1/PTEN/PTK2/SELP/SIRT1/SOX9/SRC/TEK/TGFB2/TNF/TREM2/TWIST1	54
GO:0048017	BP	GO:0048017	inositol lipid-mediated signaling	54/754	176/18614	8.51467e-33	2.52287e-31	8.95807e-32	AGT/AKT1/ANGPT1/BECN1/CAT/CCL5/CD28/CSF1R/CSF3/EDN1/EGF/EGFR/ERBB2/F2/F2R/F2RL1/FCGR3A/FGF2/FGFR1/FLT1/FLT3/FN1/GATA3/HGF/IGF1/IGF1R/IL18/INS/JAK2/KDR/KIT/LEP/MIR126/MIR21/MUC5AC/OSM/PDGFA/PDGFB/PDGFRA/PDGFRB/PIK3CD/PIK3CG/PIK3R1/PTEN/PTK2/SELP/SIRT1/SOX9/SRC/TEK/TGFB2/TNF/TREM2/TWIST1	54
GO:0032872	BP	GO:0032872	regulation of stress-activated MAPK cascade	54/754	193/18614	1.58866e-30	3.954e-29	1.40397e-29	AGER/APP/AXIN1/BMP2/BMP4/CCL19/CCL21/CCN2/CCR7/CD27/DUSP1/EGFR/F2RL1/FAS/FCGR2B/FOXM1/HGF/HMGB1/IGF1R/IL1A/IL1B/LEP/LTBR/MAP2K1/MAP2K7/MAPK1/MAPK3/MMP8/MYC/MYD88/NOD2/NOX1/PINK1/PTK2B/PYCARD/RIPK2/SIRPA/SPHK1/SPI1/TGFB2/TLR3/TLR4/TLR9/TNF/TNFSF11/TRAF3/TRAF6/TREM2/VEGFA/WNT5A/WNT7A/WNT7B/XIAP/ZC3H12A	54
GO:0070302	BP	GO:0070302	regulation of stress-activated protein kinase signaling cascade	54/754	196/18614	3.75019e-30	9.01334e-29	3.20041e-29	AGER/APP/AXIN1/BMP2/BMP4/CCL19/CCL21/CCN2/CCR7/CD27/DUSP1/EGFR/F2RL1/FAS/FCGR2B/FOXM1/HGF/HMGB1/IGF1R/IL1A/IL1B/LEP/LTBR/MAP2K1/MAP2K7/MAPK1/MAPK3/MMP8/MYC/MYD88/NOD2/NOX1/PINK1/PTK2B/PYCARD/RIPK2/SIRPA/SPHK1/SPI1/TGFB2/TLR3/TLR4/TLR9/TNF/TNFSF11/TRAF3/TRAF6/TREM2/VEGFA/WNT5A/WNT7A/WNT7B/XIAP/ZC3H12A	54
GO:0061629	MF	GO:0061629	RNA polymerase II-specific DNA-binding transcription factor binding	54/751	348/18369	2.07169e-17	8.29713e-16	5.6808e-16	ACTB/AHR/AR/ATF4/CD34/CDKN2A/CEBPA/CEBPB/CREB1/CREBBP/CTNNB1/DDIT3/EP300/ESR1/FLT3/FOS/FOXP3/GATA3/GATA6/GSK3B/HDAC9/HIF1A/HMGA2/HMGB1/HSPB1/IFI27/JUN/KEAP1/KLF4/LEF1/MAPK14/NFATC1/NFE2L2/NFKBIA/NKX2-1/PARP1/PARP9/PITX2/PPARA/PPARG/PPARGC1A/RELA/RXRA/SIRT1/SMAD2/SMAD3/SMAD4/SPI1/SRC/SRF/STAT1/STAT3/STING1/TP53	54
GO:1990868	BP	GO:1990868	response to chemokine	53/754	99/18614	1.82719e-47	1.20379e-45	4.27438e-46	CCL1/CCL11/CCL13/CCL17/CCL18/CCL19/CCL2/CCL20/CCL21/CCL22/CCL24/CCL26/CCL3/CCL4/CCL5/CCL7/CCL8/CCR1/CCR2/CCR3/CCR4/CCR5/CCR6/CCR7/CCR8/CX3CL1/CX3CR1/CXCL1/CXCL10/CXCL11/CXCL12/CXCL13/CXCL2/CXCL3/CXCL5/CXCL6/CXCL8/CXCL9/CXCR1/CXCR2/CXCR3/CXCR4/CXCR5/DUSP1/EDN1/HIF1A/LOX/PF4/PPBP/PTK2B/RHOA/TREM2/ZC3H12A	53
GO:1990869	BP	GO:1990869	cellular response to chemokine	53/754	99/18614	1.82719e-47	1.20379e-45	4.27438e-46	CCL1/CCL11/CCL13/CCL17/CCL18/CCL19/CCL2/CCL20/CCL21/CCL22/CCL24/CCL26/CCL3/CCL4/CCL5/CCL7/CCL8/CCR1/CCR2/CCR3/CCR4/CCR5/CCR6/CCR7/CCR8/CX3CL1/CX3CR1/CXCL1/CXCL10/CXCL11/CXCL12/CXCL13/CXCL2/CXCL3/CXCL5/CXCL6/CXCL8/CXCL9/CXCR1/CXCR2/CXCR3/CXCR4/CXCR5/DUSP1/EDN1/HIF1A/LOX/PF4/PPBP/PTK2B/RHOA/TREM2/ZC3H12A	53
GO:0030593	BP	GO:0030593	neutrophil chemotaxis	53/754	107/18614	4.22874e-45	2.39202e-43	8.49346e-44	BSG/C5AR1/CCL1/CCL11/CCL13/CCL17/CCL18/CCL19/CCL2/CCL20/CCL21/CCL22/CCL24/CCL26/CCL3/CCL4/CCL5/CCL7/CCL8/CCR7/CX3CL1/CXCL1/CXCL10/CXCL11/CXCL13/CXCL2/CXCL3/CXCL5/CXCL6/CXCL8/CXCL9/CXCR1/CXCR2/DPP4/EDN1/IL1B/IL23A/ITGA1/ITGB2/LGALS3/MCU/NOD2/PF4/PIK3CD/PIK3CG/PLA2G1B/PPBP/RAC1/S100A12/S100A8/S100A9/TGFB2/TREM1	53
GO:0002688	BP	GO:0002688	regulation of leukocyte chemotaxis	53/754	126/18614	2.05692e-40	8.99901e-39	3.19533e-39	ADAM10/ADAM17/AIF1/C5AR1/CCL1/CCL19/CCL2/CCL21/CCL3/CCL4/CCL5/CCL7/CCR1/CCR2/CCR6/CCR7/CSF1/CSF1R/CX3CR1/CXCL10/CXCL12/CXCL13/CXCL17/CXCL8/CXCR2/DPP4/DUSP1/EDN1/F2RL1/GREM1/HMGB1/IL23A/IL4/IL6/IL6R/LGALS9/LGMN/MAPK1/MAPK3/MCU/MIF/MMP28/NOD2/PLA2G7/PTK2/PTK2B/RAC1/SERPINE1/SPI1/THBS1/TNFSF14/VEGFA/WNT5A	53
GO:0002520	BP	GO:0002520	immune system development	53/754	197/18614	4.72879e-29	1.0635e-27	3.77623e-28	ABL1/ADAM17/ADAR/AICDA/BCL2/CCR4/CCR6/CD274/CD28/CD40/CD40LG/CTNNB1/CXCR5/FGF10/FOXJ1/FOXP3/GATA3/HMGB1/ICOS/IDO1/IL10/IL15/IL2/IL2RA/IL4/IL7R/IRAK3/LEF1/LGALS9/LRP5/LTBR/MAFB/MAP2K1/MAPK1/MAPK3/PDCD1/PDPN/PITX2/PTPRC/RIPK3/SHH/SMAD3/SOD1/SRF/STAT6/TBX21/TFRC/TGFB1/TGFBR1/TGFBR2/TNFAIP3/TP53/YY1	53
GO:0060070	BP	GO:0060070	canonical Wnt signaling pathway	53/754	313/18614	5.44624e-19	6.1864e-18	2.19664e-18	APC/APOE/AXIN1/AXIN2/BMP2/CAV1/CDH2/COL1A1/CTNNB1/DDIT3/DKK1/EDN1/EDNRA/EGF/EGFR/EGR1/FGF10/FGF2/FGF9/FGFR2/FZD3/GATA3/GLI1/GREM1/GSK3A/GSK3B/IGFBP1/IGFBP2/KLF4/LEF1/LGR5/LRP5/MAPK14/MIR145/MIR29B1/MIR29C/NFKB1/PTEN/SDC1/SHH/SMAD3/SNAI2/SOX2/SOX9/SRC/TGFB1/WNT1/WNT3A/WNT5A/WNT7A/WNT7B/XIAP/YAP1	53
GO:0032602	BP	GO:0032602	chemokine production	52/754	99/18614	5.23631e-46	3.05451e-44	1.08458e-44	ADAM17/ADIPOQ/ADORA2B/AGER/AIF1/APP/CHIA/CSF1R/CXCL6/EGR1/ELANE/F2RL1/HIF1A/HMGB1/HMOX1/IFNG/IL10/IL17A/IL17F/IL17RA/IL18/IL1B/IL1RL1/IL33/IL4R/IL6/IL6R/IL7/KLF4/LGALS9/MAVS/MIF/MIR146A/MIR34A/MYD88/NOD2/PYCARD/RIPK2/SIRPA/SNAI2/TICAM1/TLR2/TLR3/TLR4/TLR7/TLR9/TNF/TREM1/TREM2/TSLP/TWIST1/WNT5A	52
GO:0034341	BP	GO:0034341	response to type II interferon	52/754	139/18614	1.45306e-36	5.42475e-35	1.9262e-35	AIF1/ARG1/CASP1/CCL1/CCL11/CCL13/CCL17/CCL18/CCL19/CCL2/CCL20/CCL21/CCL22/CCL24/CCL26/CCL3/CCL4/CCL5/CCL7/CCL8/CD40/CD47/CDC42/CX3CL1/CXCL16/EDN1/FASLG/GAPDH/IFNG/IL12B/IRF1/IRF8/JAK1/JAK2/LGALS9/MRC1/NOS2/PARP9/PPARG/SIRPA/SNCA/STAT1/TLR2/TLR3/TLR4/TNF/TP53/TRIM21/TXK/TYK2/VIM/WNT5A	52
GO:0014065	BP	GO:0014065	phosphatidylinositol 3-kinase signaling	52/754	144/18614	1.17566e-35	4.08925e-34	1.45199e-34	AGT/AKT1/ANGPT1/BECN1/CAT/CCL5/CD28/CSF3/EDN1/EGF/EGFR/ERBB2/F2/F2R/F2RL1/FCGR3A/FGF2/FGFR1/FLT1/FLT3/FN1/GATA3/HGF/IGF1/IGF1R/IL18/INS/JAK2/KDR/KIT/LEP/MIR126/MIR21/OSM/PDGFA/PDGFB/PDGFRA/PDGFRB/PIK3CD/PIK3CG/PIK3R1/PTEN/PTK2/SELP/SIRT1/SOX9/SRC/TEK/TGFB2/TNF/TREM2/TWIST1	52
GO:0002706	BP	GO:0002706	regulation of lymphocyte mediated immunity	52/754	184/18614	1.14945e-29	2.70459e-28	9.60332e-29	AGER/AHR/ARG1/B2M/BTK/C3/CCR2/CD1A/CD1C/CD28/CD40/FCER2/FCGR1A/FCGR2B/FOXJ1/FOXP3/GATA3/HLA-DRA/HLA-DRB1/HMGB1/IFNA2/IFNB1/IL10/IL12B/IL18/IL1B/IL1R1/IL2/IL21/IL23A/IL4/IL6/IL7R/KLRB1/LAMP1/LEP/LGALS9/MAP3K7/NLRP3/NOD2/P2RX7/PTPRC/RIPK3/SMAD7/STAT6/TBX21/TFRC/TGFB1/TNF/TNFRSF1B/TRAF6/TREM2	52
GO:0050777	BP	GO:0050777	negative regulation of immune response	52/754	191/18614	8.50027e-29	1.89647e-27	6.73391e-28	A2M/ADAR/AHR/ANXA1/ARG1/ATG5/CCR2/COL3A1/CTLA4/ENPP3/FCGR2B/FOXJ1/FOXP3/FURIN/HLA-DRB1/HMOX1/IFNA2/IFNB1/IL10/IL12B/IL13RA2/IL1RL1/IL2/IL33/IL4/IL4R/IL7R/INS/IRAK3/ISG15/JAK3/LGALS3/LGALS9/MAPK14/MIR21/MMP12/NOD2/PARP1/PDCD1/PPARG/PTPRC/SMAD7/SPI1/SRC/STAT2/STAT6/TBX21/TGFB1/TNFAIP3/TREM2/TRIM21/ZC3H12A	52
GO:0060541	BP	GO:0060541	respiratory system development	52/754	211/18614	1.56575e-26	3.00281e-25	1.06622e-25	ABCA3/ACE/ARG1/BMP4/BMPR2/CCN2/CDC42/CEBPA/CHI3L1/COL3A1/CREB1/CTNNB1/EP300/FGF10/FGF7/FGF9/FGFR2/FOXJ1/GATA6/GLI1/GLI2/IGFBP5/IL13/ITGB6/KDR/KRAS/LEF1/LIF/LOX/MAP2K1/MAPK1/MAPK3/MMP12/MMP14/NKX2-1/NOS3/PDGFA/PDGFRA/PDGFRB/PDPN/SFTPD/SHH/SMAD2/SOX9/SRF/TGFB3/TGFBR2/TNF/VEGFA/WNT5A/WNT7B/YAP1	52
GO:0097305	BP	GO:0097305	response to alcohol	52/754	252/18614	1.12491e-22	1.71648e-21	6.0948e-22	A2M/ACE/ADIPOQ/AHR/AKT1/BCL2L1/CASP8/CAT/CCL19/CCL21/CCL3/CCL7/CCND1/CCR5/CCR7/CD14/CD27/CDH1/CFTR/CREB1/CSF3/CTNNB1/CTSK/CYBB/FGFR2/FOS/FOSL1/FOXP3/GATA3/GLB1/IGF1R/IL13/IL2/KCNMB1/LEP/MYD88/PARP1/PPARA/PRKAA2/PTGER2/PTH/PTK2B/RHOA/S100A8/SMAD2/SOD1/SOD2/TGFB1/TGFBR1/TGFBR2/TNF/VCAM1	52
GO:1903532	BP	GO:1903532	positive regulation of secretion by cell	52/754	289/18614	7.39006e-20	9.09545e-19	3.22957e-19	ADORA2A/ADORA2B/AGT/BMP2/CD38/CFTR/CREB1/CXCL12/EDN1/F2/F2RL1/FGB/GRP/HIF1A/HLA-DRB1/IFNG/IGF1/IL13/IL1A/IL1B/IL4/IL4R/INS/ITGAM/ITGB2/JAK2/LAMP1/LEP/MAP2K6/MCU/MIF/P2RX7/PDX1/PINK1/PLA2G1B/PLA2G4A/PPARG/PTPN11/SDC1/SDC4/SMAD4/SNCA/SPP1/SYT7/TGFB1/TGFB2/TGFB3/TLR2/TLR4/TNFSF11/TREM2/TSG101	52
GO:0090092	BP	GO:0090092	regulation of transmembrane receptor protein serine/threonine kinase signaling pathway	52/754	301/18614	4.77187e-19	5.46472e-18	1.94039e-18	ABL1/ACVRL1/ADAM17/AXIN1/BMP2/BMP4/BMP7/BMPR2/CAV1/CDH5/CREBBP/DKK1/ENG/EP300/FGF10/FGF9/GATA6/GDF15/GREM1/HSPA1A/HSPA5/IL17F/JAK2/KDR/LOX/LRP1/LTBP1/MIR146A/MIR21/MIR29B1/NKX2-1/PARP1/PPARA/PPARG/SHH/SIRT1/SMAD2/SMAD3/SMAD4/SMAD7/TGFB1/TGFB2/TGFB3/TGFBR1/TGFBR2/THBS1/TP53/TRIM33/WNT1/WNT5A/XIAP/ZEB1	52
GO:0006874	BP	GO:0006874	intracellular calcium ion homeostasis	52/754	303/18614	6.44731e-19	7.27922e-18	2.58467e-18	ABL1/APOE/APP/ATF4/ATG5/BAX/BCL2/CALCA/CAV1/CCL1/CCL11/CCL13/CCL19/CCL21/CCL3/CCL5/CCL7/CCL8/CCR1/CCR2/CCR5/CCR7/CD19/CD40/CDH5/CX3CL1/CXCL10/CXCL11/CXCL12/CXCL9/DDIT3/EDN1/EDNRA/ELANE/F2/F2R/FASLG/FGF2/IL13/ITGB3/LCK/MCU/P2RX7/PTH/PTK2B/PTPRC/SNCA/TCIRG1/THY1/UBASH3B/WNT5A/XK	52
GO:0010506	BP	GO:0010506	regulation of autophagy	52/754	348/18614	2.92084e-16	2.70807e-15	9.61567e-16	ABL1/AKT1/ATF6/ATG5/BCL2/BECN1/CASP3/DDIT3/EP300/ERN1/FOXO3/GAPDH/GSK3A/GSK3B/HGF/HIF1A/HMGB1/HMOX1/HSPB1/IFNB1/IFNG/IL10/IL10RA/IL4/KDR/KEAP1/LAMP3/LEP/MAP3K7/MAPK3/MAPK8/MCL1/MET/MTOR/NOD2/PINK1/PRKAA2/PYCARD/RIPK2/ROCK1/SIRT1/SNCA/STAT3/STING1/TBK1/TFEB/TICAM1/TLR9/TP53/TREM2/TRIM21/ZC3H12A	52
GO:1902074	BP	GO:1902074	response to salt	52/754	383/18614	1.64309e-14	1.30515e-13	4.63425e-14	ACTA1/ADIPOQ/AIF1/ATG5/B2M/CAT/CAV1/CCND1/CDH1/CEBPA/COL1A1/CXCR4/EDN1/EDNRA/EGR1/FABP4/FGB/FOS/GSK3A/HSP90AA1/HSPA5/IGF1R/IGFBP2/IL1A/IL1B/JUN/JUNB/KCNMB1/KCNMB2/KRT8/LEP/LGMN/MAP1LC3A/NFE2L2/NT5E/P2RX7/PDGFB/PDX1/PRKAA2/PTGS2/PTK2B/SDC1/SHH/SMPD1/SOD1/SOD2/SYT7/THBS1/TLR9/TNF/WNT5A/ZC3H12A	52
GO:0150063	BP	GO:0150063	visual system development	52/754	389/18614	3.10806e-14	2.43428e-13	8.64353e-14	ACVRL1/AQP5/ATF4/ATF6/BAX/BCL2/BMP4/BMP7/BMPR2/C1QA/C3/CTNNB1/EGFR/EPHB2/FASLG/FAT1/FGF10/FGF2/FGF9/FLT1/GATA3/HIF1A/ITGAM/JUN/KDR/KLF4/LRP5/MERTK/PDGFRA/PDGFRB/PITX2/PROM1/SHH/SMAD3/SOX2/SOX9/SRF/STAT3/TCIRG1/TGFB2/TGFBR1/TGFBR2/THY1/TWIST1/VEGFA/VIM/WNT5A/WNT7A/WNT7B/YY1/ZEB1/ZHX2	52
GO:0048880	BP	GO:0048880	sensory system development	52/754	395/18614	5.79581e-14	4.4461e-13	1.5787e-13	ACVRL1/AQP5/ATF4/ATF6/BAX/BCL2/BMP4/BMP7/BMPR2/C1QA/C3/CTNNB1/EGFR/EPHB2/FASLG/FAT1/FGF10/FGF2/FGF9/FLT1/GATA3/HIF1A/ITGAM/JUN/KDR/KLF4/LRP5/MERTK/PDGFRA/PDGFRB/PITX2/PROM1/SHH/SMAD3/SOX2/SOX9/SRF/STAT3/TCIRG1/TGFB2/TGFBR1/TGFBR2/THY1/TWIST1/VEGFA/VIM/WNT5A/WNT7A/WNT7B/YY1/ZEB1/ZHX2	52
GO:0007389	BP	GO:0007389	pattern specification process	52/754	467/18614	3.90149e-11	2.21361e-10	7.85998e-11	ACVRL1/APC/AR/AXIN1/AXIN2/BMP1/BMP2/BMP4/BMP7/BMPR2/C1QA/C3/CTNNB1/DDIT3/DKK1/EDN1/ENG/EP300/FGF1/FGF10/FGF2/FGFR2/FOXJ1/GLI1/GLI2/GREM1/HIF1A/ITGAM/LEF1/LRP5/MAFB/NKX2-1/PITX2/PLXNA2/SHH/SMAD1/SMAD2/SMAD3/SMAD4/SNAI1/SRF/TGFBR1/TGFBR2/TP53/TP63/WNT1/WNT3A/WNT5A/WNT7A/WNT7B/YY1/ZEB1	52
GO:0001228	MF	GO:0001228	DNA-binding transcription activator activity, RNA polymerase II-specific	52/751	468/18369	5.86036e-11	1.17354e-09	8.03487e-10	AR/ATF3/ATF4/ATF6/CEBPA/CEBPB/CREB1/DDIT3/EGR1/ESR1/FLI1/FOS/FOSL1/FOSL2/FOXJ1/FOXO3/GATA3/GLI1/HIF1A/HLF/IRF1/IRF3/IRF4/IRF5/IRF6/JUN/JUNB/KLF4/LEF1/MAFB/MYB/MYC/NFATC1/NFE2L2/NFKB1/NR3C1/PPARA/RELA/SMAD1/SMAD2/SMAD3/SMAD4/SOX2/SOX9/SPI1/SRF/STAT3/STAT6/TBX21/TP53/TP63/YY1	52
GO:0001216	MF	GO:0001216	DNA-binding transcription activator activity	52/751	472/18369	8.01928e-11	1.56669e-09	1.07267e-09	AR/ATF3/ATF4/ATF6/CEBPA/CEBPB/CREB1/DDIT3/EGR1/ESR1/FLI1/FOS/FOSL1/FOSL2/FOXJ1/FOXO3/GATA3/GLI1/HIF1A/HLF/IRF1/IRF3/IRF4/IRF5/IRF6/JUN/JUNB/KLF4/LEF1/MAFB/MYB/MYC/NFATC1/NFE2L2/NFKB1/NR3C1/PPARA/RELA/SMAD1/SMAD2/SMAD3/SMAD4/SOX2/SOX9/SPI1/SRF/STAT3/STAT6/TBX21/TP53/TP63/YY1	52
GO:0032642	BP	GO:0032642	regulation of chemokine production	51/754	98/18614	7.24952e-45	3.90359e-43	1.38607e-43	ADAM17/ADIPOQ/ADORA2B/AGER/AIF1/APP/CHIA/CSF1R/CXCL6/EGR1/ELANE/F2RL1/HIF1A/HMGB1/HMOX1/IFNG/IL10/IL17A/IL17F/IL17RA/IL18/IL1B/IL1RL1/IL33/IL4R/IL6/IL6R/IL7/KLF4/LGALS9/MAVS/MIF/MIR146A/MIR34A/MYD88/NOD2/PYCARD/RIPK2/SIRPA/SNAI2/TICAM1/TLR2/TLR3/TLR4/TLR7/TLR9/TNF/TREM2/TSLP/TWIST1/WNT5A	51
GO:0071347	BP	GO:0071347	cellular response to interleukin-1	51/754	111/18614	2.5736e-41	1.19109e-39	4.22925e-40	CAMP/CCL1/CCL11/CCL13/CCL17/CCL18/CCL19/CCL2/CCL20/CCL21/CCL22/CCL24/CCL26/CCL3/CCL4/CCL5/CCL7/CCL8/CD40/CD47/CEBPB/CX3CL1/CXCL8/EDN1/EGR1/FGB/HAS2/HIF1A/IL17A/IL1B/IL1R1/IL1R2/IL1RN/IL6/IRAK3/MAP2K7/MAP3K7/MAPK3/MIR146A/MIR21/MMP2/MYD88/NFKB1/PYCARD/RELA/SIRPA/SOX9/TOLLIP/TRAF6/YY1/ZC3H12A	51
GO:0002367	BP	GO:0002367	cytokine production involved in immune response	51/754	121/18614	5.6164e-39	2.34715e-37	8.33416e-38	ANGPT1/APOA1/ARG1/ATG5/AXL/B2M/BTK/CCR2/F2RL1/FOXP3/GATA3/HMOX1/IFNA2/IFNB1/IL10/IL18/IL1B/IL1R1/IL4/IL6/IRAK3/JAK3/KIT/MAP3K7/MAPKAPK2/MAVS/MIF/MYD88/NLRP3/NOD2/P2RX7/PYCARD/RIPK2/SEMA7A/SIRT1/SMAD7/TBX21/TGFB1/TGFB2/TGFB3/TICAM1/TLR3/TLR4/TLR7/TLR9/TNF/TNFRSF1B/TRAF6/TREM1/TWIST1/WNT5A	51
GO:0060759	BP	GO:0060759	regulation of response to cytokine stimulus	51/754	177/18614	1.46217e-29	3.38354e-28	1.20141e-28	ADAM17/ADAR/ADIPOQ/ANGPT1/APOA1/ARG1/AXL/CASP1/CASP8/CAV1/CCL5/CSF1/CXCR4/EDN1/F2RL1/HIF1A/HSPA1A/IFIH1/IL1R1/IL1R2/IL1RN/IL6/IL7/IRAK3/IRF3/IRF7/ISG15/KLF4/MAVS/MIR21/MIR29B1/MMP12/PARP9/PPARG/PTPN11/PTPRC/PYCARD/RIPK2/SPHK1/STAT2/STING1/TBK1/TLR2/TLR4/TNFAIP3/TNFRSF1A/TREM2/TSLP/TXK/WNT5A/XIAP	51
GO:0030324	BP	GO:0030324	lung development	51/754	186/18614	2.00398e-28	4.28333e-27	1.5209e-27	ABCA3/ACE/ARG1/BMP4/BMPR2/CCN2/CDC42/CEBPA/CHI3L1/COL3A1/CREB1/CTNNB1/EP300/FGF10/FGF7/FGF9/FGFR2/FOXJ1/GATA6/GLI1/GLI2/IGFBP5/IL13/ITGB6/KDR/KRAS/LIF/LOX/MAP2K1/MAPK1/MAPK3/MMP12/MMP14/NKX2-1/NOS3/PDGFA/PDGFRA/PDGFRB/PDPN/SFTPD/SHH/SMAD2/SOX9/SRF/TGFB3/TGFBR2/TNF/VEGFA/WNT5A/WNT7B/YAP1	51
GO:0061138	BP	GO:0061138	morphogenesis of a branching epithelium	51/754	188/18614	3.50421e-28	7.32222e-27	2.59994e-27	ABL1/ADM/AGT/AGTR2/AR/AREG/BCL2/BMP2/BMP4/BMP7/CCL11/CSF1/CTNNB1/EDN1/EDNRA/EGF/ENG/ESR1/FGF1/FGF10/FGF2/FGF7/FGFR2/GLI2/GNA13/GREM1/HGF/IL10/KDR/KRAS/LEF1/LRP5/MET/MMP14/MYC/NKX2-1/PDGFA/SHH/SMAD4/SNAI2/SOCS3/SOX9/SRC/SRF/TGFBR2/TNF/TP63/VEGFA/WNT1/WNT5A/YAP1	51
GO:0030323	BP	GO:0030323	respiratory tube development	51/754	190/18614	6.07945e-28	1.24252e-26	4.41186e-27	ABCA3/ACE/ARG1/BMP4/BMPR2/CCN2/CDC42/CEBPA/CHI3L1/COL3A1/CREB1/CTNNB1/EP300/FGF10/FGF7/FGF9/FGFR2/FOXJ1/GATA6/GLI1/GLI2/IGFBP5/IL13/ITGB6/KDR/KRAS/LIF/LOX/MAP2K1/MAPK1/MAPK3/MMP12/MMP14/NKX2-1/NOS3/PDGFA/PDGFRA/PDGFRB/PDPN/SFTPD/SHH/SMAD2/SOX9/SRF/TGFB3/TGFBR2/TNF/VEGFA/WNT5A/WNT7B/YAP1	51
GO:0043123	BP	GO:0043123	positive regulation of I-kappaB kinase/NF-kappaB signaling	51/754	192/18614	1.04665e-27	2.10836e-26	7.48628e-27	ABL1/ADIPOQ/CASP1/CASP8/CCL19/CCL21/CCR7/CD4/CD40/CFLAR/CHUK/CTNNB1/CX3CL1/F2R/F2RL1/FASLG/GAPDH/HLA-DRB1/HMOX1/IL1A/IL1B/IRF3/LGALS1/LGALS9/LPAR1/LTBR/MAP3K7/MAVS/MYD88/NOD2/NUP62/PINK1/RELA/RHOA/RIPK2/S100A12/S100A4/S100B/TBK1/TFRC/TICAM1/TLR3/TLR4/TLR9/TNF/TNFRSF10B/TNFRSF1A/TNFSF10/TNFSF11/TRAF6/TRIM21	51
GO:0001763	BP	GO:0001763	morphogenesis of a branching structure	51/754	203/18614	1.8252e-26	3.48845e-25	1.23866e-25	ABL1/ADM/AGT/AGTR2/AR/AREG/BCL2/BMP2/BMP4/BMP7/CCL11/CSF1/CTNNB1/EDN1/EDNRA/EGF/ENG/ESR1/FGF1/FGF10/FGF2/FGF7/FGFR2/GLI2/GNA13/GREM1/HGF/IL10/KDR/KRAS/LEF1/LRP5/MET/MMP14/MYC/NKX2-1/PDGFA/SHH/SMAD4/SNAI2/SOCS3/SOX9/SRC/SRF/TGFBR2/TNF/TP63/VEGFA/WNT1/WNT5A/YAP1	51
GO:0043281	BP	GO:0043281	regulation of cysteine-type endopeptidase activity involved in apoptotic process	51/754	204/18614	2.34271e-26	4.4623e-25	1.58445e-25	ADORA2A/AKT1/BAX/BBC3/BID/CASP1/CASP8/CASP9/CCN2/CD27/CD44/CTSD/CYCS/EIF2AK3/F2R/F3/FAS/FASLG/HGF/HMGB1/IL9/JAK2/KLF4/LAMP3/LCK/LGALS9/MMP9/MYC/NLRC4/NLRP1/NLRP3/PLAUR/PPARG/PTGS2/PYCARD/RHOA/S100A8/S100A9/SIRT1/SMAD3/SNCA/SOX2/SRC/THBS1/TNF/TNFSF10/TNFSF14/TP63/VEGFA/WNT3A/XIAP	51
GO:0002218	BP	GO:0002218	activation of innate immune response	51/754	233/18614	1.71948e-23	2.72778e-22	9.68568e-23	AIM2/BTK/CASP1/CAV1/CD14/CD40/CREBBP/EP300/ESR1/F2RL1/FCN1/HMGB1/HSP90AA1/HSPA1A/IFIH1/IRAK3/IRF1/IRF3/IRF4/IRF7/MAP2K6/MAP3K7/MAPKAPK2/MAVS/MIR146A/MYD88/NFKBIA/NLRC4/NLRP1/NLRP3/NOD2/PYCARD/RELA/RIPK2/SRC/STING1/TBK1/TICAM1/TLR2/TLR3/TLR4/TLR5/TLR7/TLR8/TLR9/TNF/TNFAIP3/TRAF3/TRAF6/TREM2/XIAP	51
GO:0010001	BP	GO:0010001	glial cell differentiation	51/754	235/18614	2.60203e-23	4.09308e-22	1.45335e-22	ABL1/ADORA2A/AGER/AKT1/AKT2/APP/BMP2/C1QA/C5AR1/CDH2/CTNNB1/CXCR4/DNER/ERBB2/F2/FGF10/FGF2/IFNG/IL1B/IL33/IL6/IL6ST/KRAS/LEF1/LIF/LPAR1/LRP1/MAP2K1/MAPK1/MAPK3/MTOR/NKX2-1/NR3C1/PTEN/PTPN11/RHOA/S100A8/S100A9/SHH/SOD1/SOX2/SOX9/STAT3/TGFB1/TLR2/TLR4/TNF/TNFRSF1B/TREM2/VIM/VTN	51
GO:0003018	BP	GO:0003018	vascular process in circulatory system	51/754	265/18614	7.74449e-21	1.03015e-19	3.65779e-20	ABL1/ACE/ACE2/ADM/ADORA2A/ADORA2B/AGER/AGT/AGTR1/AGTR2/ANGPT1/APOE/ATG5/BMPR2/CALCA/CAV1/CD38/CDH5/CRP/CXCR2/ECE1/EDN1/EDNRA/F2R/F2RL1/FGB/INS/ITGA1/KCNMB1/KCNMB2/LEP/LRP1/MIR21/MMP2/NOS3/NPPB/OCLN/PTGS2/RHOA/ROCK1/SLC2A1/SOD1/SOD2/SOD3/SRC/TEK/TFRC/TGFB1/TJP1/TNF/VEGFA	51
GO:0045165	BP	GO:0045165	cell fate commitment	51/754	281/18614	1.14391e-19	1.38655e-18	4.9233e-19	APC/AR/BCL2/BMP2/BMP4/CASP3/CDC42/CTNNB1/CTSL/DKK1/EDN1/EDNRA/FGF10/FGF2/FGFR2/FOXP3/GATA3/GATA6/GLI2/IL12B/IL23A/IL6/IL6R/IL7/IRF4/ITGB1/KDM6B/KDR/KLF4/MCL1/MTOR/NKX2-1/PDPN/PPARG/RHOA/SHH/SMAD1/SMAD2/SMAD4/SOX2/SOX9/STAT3/STAT6/TBX21/TGFBR1/TP53/WNT1/WNT3A/WNT5A/WNT7A/WNT7B	51
GO:0007548	BP	GO:0007548	sex differentiation	51/754	283/18614	1.57824e-19	1.8966e-18	6.73435e-19	A2M/ACE/AR/ATN1/AXL/BAX/BCL2/BCL2L1/CASP3/CCND1/CEBPB/CTNNB1/EREG/ESR1/FGF10/FGF9/GATA3/GATA6/HSPA5/IL1A/KDR/KIT/KITLG/LEP/MERTK/MMP14/MMP2/NKX2-1/NOS3/PDGFA/PDGFRA/PDGFRB/PTPN11/PTX3/REN/SDC1/SHH/SIRT1/SMAD4/SOD1/SOX9/SRC/TGFB2/TGFBR1/TLR3/TLR9/TNFSF10/TP63/VEGFA/WNT5A/WNT7A	51
GO:0051146	BP	GO:0051146	striated muscle cell differentiation	51/754	297/18614	1.38066e-18	1.53103e-17	5.43631e-18	ACTA1/AGT/AKT1/ATG5/BCL2/BMP2/BMP4/CASP3/CD9/CDH2/CFLAR/CXCL10/CXCL9/DKK1/DNER/EDN1/EFNB2/GATA6/GDF15/GREM1/GSK3A/HDAC9/IGF1/IGF2/IGFBP5/IL4/IL4R/ITGB1/KDM6B/KRAS/KRT19/KRT8/MAPK14/MMP14/MTOR/NOX4/PDGFRA/PDGFRB/PPARA/SDC1/SHH/SMAD4/SRF/TGFB1/TNFSF14/VEGFA/WNT1/WNT3A/XBP1/XK/YY1	51
GO:0051222	BP	GO:0051222	positive regulation of protein transport	51/754	309/18614	7.94242e-18	8.31356e-17	2.95194e-17	ADORA2A/AKT2/BBC3/CD38/CDH1/CFTR/ERBB2/F2/F2RL1/FGB/GSK3A/GSK3B/GZMB/HIF1A/HLA-DRB1/HPS4/HSP90AA1/IFNG/IGF1/IL13/IL1A/IL1B/INS/ITGAM/ITGB2/JAK2/LEP/MAPK14/MAPK8/MAVS/MCU/P2RX7/PDX1/PIK3R1/PINK1/PLA2G1B/PPARG/PRKCD/PTGS2/SHH/SMAD3/SRC/TGFB1/TGFB2/TGFB3/TLR2/TLR4/TNF/TREM2/TSG101/ZC3H12A	51
GO:1904951	BP	GO:1904951	positive regulation of establishment of protein localization	51/754	325/18614	7.10369e-17	6.90637e-16	2.45228e-16	ADORA2A/AKT2/BBC3/CD38/CDH1/CFTR/ERBB2/F2/F2RL1/FGB/GSK3A/GSK3B/GZMB/HIF1A/HLA-DRB1/HPS4/HSP90AA1/IFNG/IGF1/IL13/IL1A/IL1B/INS/ITGAM/ITGB2/JAK2/LEP/MAPK14/MAPK8/MAVS/MCU/P2RX7/PDX1/PIK3R1/PINK1/PLA2G1B/PPARG/PRKCD/PTGS2/SHH/SMAD3/SRC/TGFB1/TGFB2/TGFB3/TLR2/TLR4/TNF/TREM2/TSG101/ZC3H12A	51
GO:0030111	BP	GO:0030111	regulation of Wnt signaling pathway	51/754	338/18614	3.77926e-16	3.45814e-15	1.2279e-15	ABL1/APC/APOE/APP/AXIN1/AXIN2/BMP2/CAV1/CCN4/CDH2/COL1A1/CTNNB1/DDIT3/DKK1/EGF/EGFR/EGR1/FGF10/FGF2/FGF9/FGFR2/GLI1/GREM1/GSK3A/GSK3B/IGFBP1/IGFBP2/LEF1/LGR5/LRP1/MAPK14/MBD2/MIR145/MIR29B1/MIR29C/NFATC1/NFKB1/SHH/SMAD3/SNAI2/SOX2/SOX9/SRC/TERT/TGFB1/TLR2/TNFAIP3/WNT3A/WNT5A/XIAP/YAP1	51
GO:0050767	BP	GO:0050767	regulation of neurogenesis	51/754	381/18614	5.24404e-14	4.02834e-13	1.43036e-13	ACE/B2M/BMP2/BMP7/BMPR2/CCL11/CDH1/CTNNB1/CX3CL1/CX3CR1/CXCL12/CXCR4/EPHB2/F2/FGF2/FN1/FZD3/HIF1A/IFNG/IL1B/IL33/IL6/IL6ST/ITGB1/KIT/KRAS/LEF1/LIF/MAP2K1/MECP2/MIR146A/MTOR/NGF/PLXNA2/PTEN/SEMA7A/SHH/SPP1/SRF/TGFB1/THY1/TLR2/TNF/TNFRSF1B/TP53/TREM2/VEGFA/WNT3A/WNT5A/WNT7A/YAP1	51
GO:0002718	BP	GO:0002718	regulation of cytokine production involved in immune response	50/754	119/18614	3.77248e-38	1.54204e-36	5.47539e-37	ANGPT1/APOA1/ARG1/ATG5/AXL/B2M/BTK/CCR2/F2RL1/FOXP3/GATA3/HMOX1/IFNA2/IFNB1/IL10/IL18/IL1B/IL1R1/IL4/IL6/IRAK3/JAK3/KIT/MAP3K7/MAPKAPK2/MAVS/MIF/MYD88/NLRP3/NOD2/P2RX7/PYCARD/RIPK2/SEMA7A/SIRT1/SMAD7/TBX21/TGFB1/TGFB2/TGFB3/TICAM1/TLR3/TLR4/TLR7/TLR9/TNF/TNFRSF1B/TRAF6/TWIST1/WNT5A	50
GO:0071675	BP	GO:0071675	regulation of mononuclear cell migration	50/754	122/18614	1.66636e-37	6.52562e-36	2.31709e-36	ABL1/ADAM10/ADAM17/AGER/AIF1/AKT1/APP/C5AR1/CCL1/CCL2/CCL20/CCL21/CCL3/CCL4/CCL5/CCL7/CCR1/CCR2/CCR6/CCR7/CD47/CSF1/CSF1R/CX3CR1/CXCL10/CXCL12/CXCL13/CXCL17/DUSP1/GREM1/HMGB1/IL4/ITGB3/LGALS3/LGALS9/LGMN/MAPK1/MAPK3/PLA2G7/PTK2/PTK2B/PYCARD/RHOA/RIPK3/SERPINE1/SPI1/THBS1/TNF/TNFSF14/WNT5A	50
GO:0051092	BP	GO:0051092	positive regulation of NF-kappaB transcription factor activity	50/754	159/18614	5.16602e-31	1.32099e-29	4.69051e-30	AGER/AGT/AIM2/ALK/APP/AR/BTK/CAT/CAV1/CD40/CD40LG/CFLAR/CHUK/CX3CL1/CX3CR1/EP300/GREM1/HSPA1A/IL18/IL1B/INS/IRAK3/LGALS9/MAP3K7/MYD88/NLRC4/NLRP3/NOD2/PLA2G1B/PYCARD/RELA/RIPK2/RIPK3/S100A12/S100A8/S100A9/SPHK1/STAT3/TFRC/TICAM1/TLR2/TLR3/TLR4/TLR9/TNF/TNFSF11/TRAF6/TRIM21/TRIM37/WNT5A	50
GO:0045637	BP	GO:0045637	regulation of myeloid cell differentiation	50/754	214/18614	2.0462e-24	3.46186e-23	1.22922e-23	ADIPOQ/APCS/B2M/CASP8/CCL3/CCR1/CD4/CEBPB/CREB1/CSF1/CSF3/CTNNB1/FOS/FOXO3/HIF1A/HLA-DRB1/HSPA1A/IFNG/IL12B/IL17A/IL23A/IL4/IL5/IRF7/ISG15/KITLG/LEF1/LIF/LOX/MAFB/MAPK14/MIR145/MTOR/MYB/MYC/NFKBIA/PF4/PIK3R1/PTK2B/SPI1/STAT1/STAT3/TGFB1/TLR3/TLR4/TNF/TNFSF11/TRAF6/TREM2/UBASH3B	50
GO:0006898	BP	GO:0006898	receptor-mediated endocytosis	50/754	256/18614	9.62197e-21	1.27083e-19	4.51239e-20	ACE2/ADIPOQ/ADM/ANGPT1/APOE/B2M/C3/CAV1/CCL19/CCL21/CD14/CD63/CD9/CTSL/CXCL16/CXCL8/CXCR1/CXCR2/DKK1/DPP4/EFNB2/EGF/FCGR1A/FCGR2B/GREM1/IL4/ITGAM/ITGAV/ITGB1/ITGB2/ITGB3/LPAR1/LRP1/LYVE1/MARCO/MRC1/MSR1/RAC1/SDC1/SELE/SERPINE1/SFTPD/SIGLEC1/SNCA/TF/TFRC/TGFBR2/VEGFA/VTN/WNT3A	50
GO:0045927	BP	GO:0045927	positive regulation of growth	50/754	258/18614	1.37287e-20	1.79628e-19	6.37813e-20	ADAM10/ADAM17/AKT1/BCL2/BMPR2/CD38/CDC42/CREB1/CSF1/CXCL12/CXCL16/CXCR4/EDN1/EGFR/ERBB2/F2/FGF2/FGF9/FGFR2/FN1/GATA6/GLI1/HBEGF/IGF1/IGF2/IGFBP1/IL2/IL7/IL9/INS/KRT17/LEP/MAPK14/MMP14/MTOR/NGF/PTK2B/RHOA/S100A8/S100A9/SEMA7A/SMAD7/SPHK1/SRF/TGFB2/TGFBR1/TGFBR2/VEGFA/WNT3A/YAP1	50
GO:0014706	BP	GO:0014706	striated muscle tissue development	50/754	259/18614	1.63759e-20	2.13764e-19	7.59024e-20	ABL1/AGT/ATG5/BMP2/BMP4/BMP7/CDC42/CREB1/DKK1/EDN1/EDNRA/EFNB2/ENG/FGF2/FGF9/FGFR2/GATA6/GLI1/GREM1/GSK3A/IGF1/ITGB1/KDM6B/LEF1/LOX/MAPK14/MTOR/NOX4/NPPB/PDGFRA/PDGFRB/PPARA/S1PR1/SHH/SMAD1/SMAD3/SMAD4/SMAD7/SRF/TAFAZZIN/TGFB1/TGFB2/TGFBR1/TGFBR2/TWIST1/VEGFA/WNT3A/WNT5A/YAP1/YY1	50
GO:0002429	BP	GO:0002429	immune response-activating cell surface receptor signaling pathway	50/754	302/18614	1.47463e-17	1.5208e-16	5.39998e-17	ABL1/BAX/BCAR1/BCL2/BTK/C5AR1/CCR7/CD14/CD19/CD28/CD38/CD47/CD79A/CD8A/CREBBP/CTLA4/EP300/F2RL1/FCGR2B/FCN1/FOXP3/FPR1/GATA3/HLA-DRB1/IGHE/ITK/LCK/LGALS3/MAP3K7/MAPK1/MIR146A/MIR34A/MS4A1/NFKB1/NFKBIA/NOD2/PIK3CD/PRKCD/PTK2/PTPRC/RELA/RIPK2/SRC/THY1/TLR4/TNFAIP3/TRAF6/TREM2/TXK/ZC3H12A	50
GO:0051346	BP	GO:0051346	negative regulation of hydrolase activity	50/754	345/18614	3.89063e-15	3.23257e-14	1.14781e-14	A2M/ABL1/ADORA2A/AKT1/ANGPTL3/ANXA1/APCS/APOA1/APP/CD27/CD44/CST3/CTSB/GAPDH/GSK3B/HDAC9/HGF/IL9/KLF4/LAMP3/LGALS3/LRP1/LXN/MIR21/MIR29B1/MIR29C/MMP9/NGF/NOS3/PLAUR/PTGS2/PTX3/RENBP/ROCK1/SERPINA1/SERPINE1/SERPINH1/SNCA/SRC/TGFB2/THBS1/TIMP1/TIMP2/TIMP3/TIMP4/TNF/TNFSF14/VEGFA/VTN/XIAP	50
GO:0008544	BP	GO:0008544	epidermis development	50/754	375/18614	1.09084e-13	8.11252e-13	2.88055e-13	ANXA1/BCL2/BMP4/CASP3/CCN2/CFLAR/CLDN4/CTNNB1/DKK1/EGFR/EREG/FGF10/FGF2/FGF7/FGFR2/FOSL2/FZD3/GATA6/GLI1/GLI2/HLA-DRB1/IGFBP5/IL17A/IL18/IL1A/IRF6/KEAP1/KLF4/KRT17/KRT5/LGR5/MAFB/MAP2K1/MET/PDGFA/PITX2/PPARA/RELA/ROCK1/SHH/SMAD4/SNAI1/SOD1/SOX9/TGFB2/TNF/TP63/TSG101/WNT5A/YAP1	50
GO:0006869	BP	GO:0006869	lipid transport	50/754	447/18614	7.97132e-11	4.37641e-10	1.55396e-10	ABCA3/ACE/ADIPOQ/AGT/AGTR1/AKT1/AKT2/ANXA1/APOA1/APOE/CAV1/CFTR/EDN1/EGF/FABP4/FASLG/FURIN/IL1A/IL1B/ITGAV/ITGB3/LEP/LRP1/MAP2K6/MIF/MIR34A/MSR1/NFKB1/NFKBIA/NOS2/P2RX7/PLA2G1B/PLA2G4A/PPARA/PPARG/PRKCD/PTGS2/PTPN11/REN/RXRA/SFTPA1/SHH/SIRT1/SLC2A1/SPP1/STAR/SYT7/THBS1/TNFSF11/TREM2	50
GO:0070851	MF	GO:0070851	growth factor receptor binding	50/751	137/18369	2.12931e-34	3.41116e-32	2.33552e-32	ADAM17/APP/CDH5/CSF2/CSF3/EGF/EREG/ERN1/FGF1/FGF10/FGF2/FGF7/FGF9/GATA3/GREM1/IL10/IL11/IL12B/IL1A/IL1B/IL1R1/IL1RN/IL2/IL21/IL3/IL37/IL4/IL5/IL6/IL6R/IL6ST/IL7/IL9/ITGB3/JAK2/KL/MS4A1/MYD88/PDGFA/PDGFB/PDGFRA/PDGFRB/PYCARD/SRC/TGFA/TLR5/TLR9/TOLLIP/TSLP/VEGFA	50
GO:0070098	BP	GO:0070098	chemokine-mediated signaling pathway	49/754	91/18614	4.08346e-44	2.13714e-42	7.58845e-43	CCL1/CCL11/CCL13/CCL17/CCL18/CCL19/CCL2/CCL20/CCL21/CCL22/CCL24/CCL26/CCL3/CCL4/CCL5/CCL7/CCL8/CCR1/CCR2/CCR3/CCR4/CCR5/CCR6/CCR7/CCR8/CX3CL1/CX3CR1/CXCL1/CXCL10/CXCL11/CXCL12/CXCL13/CXCL2/CXCL3/CXCL5/CXCL6/CXCL8/CXCL9/CXCR1/CXCR2/CXCR3/CXCR4/CXCR5/EDN1/HIF1A/PF4/PPBP/PTK2B/TREM2	49
GO:0010595	BP	GO:0010595	positive regulation of endothelial cell migration	49/754	131/18614	1.6532e-34	5.32065e-33	1.88923e-33	ABL1/ADAM17/AGT/AKT1/ANGPT1/ANGPT4/ANXA1/BCAR1/BMP4/BMPR2/CD40/EDN1/EGF/FGF1/FGF2/FGFR1/FUT1/GATA3/HDAC9/HIF1A/HMGB1/HMOX1/HSPB1/ITGB3/KDR/LGMN/MET/MIR126/MIR146A/MIR21/MIR29A/NFE2L2/NOS3/PDGFB/PIK3CD/PIK3CG/PTGS2/PTK2B/RAC1/SIRT1/SPARC/STAT5A/TEK/TGFB1/THBS1/VEGFA/WNT5A/WNT7A/ZC3H12A	49
GO:0002702	BP	GO:0002702	positive regulation of production of molecular mediator of immune response	49/754	134/18614	5.85485e-34	1.84198e-32	6.5404e-33	B2M/BTK/CD28/CD40/CD86/EPHB2/F2RL1/GATA3/IL10/IL13/IL17A/IL17F/IL18/IL1B/IL1R1/IL2/IL21/IL33/IL4/IL4R/IL5/IL6/KIT/MAP3K7/MAPKAPK2/MAVS/MIF/MYD88/MZB1/NLRP3/NOD2/P2RX7/PTPRC/PYCARD/RIPK2/SEMA7A/SIRT1/STAT6/TBX21/TFRC/TGFB1/TICAM1/TLR3/TLR4/TLR7/TLR9/TRAF6/WNT5A/XBP1	49
GO:0001906	BP	GO:0001906	cell killing	49/754	197/18614	2.94097e-25	5.21185e-24	1.8506e-24	AGER/ARG1/ATN1/B2M/BCL2L1/C3/CCL13/CD1A/CD1C/CD2/CX3CR1/CXCL6/ELANE/F2/F2RL1/FCER2/FCGR1A/FCGR2B/FCGR3A/GAPDH/GZMB/HLA-DRA/HLA-DRB1/HPRT1/ICAM1/IFNG/IL12B/IL13/IL18/IL21/IL23A/IL4/IL7R/ITGAM/KLRB1/LAMP1/LEP/LGALS9/LYZ/MAPK8/MYD88/NOS2/P2RX7/PTPRC/RIPK3/S100A12/SPI1/TGFB1/TREM1	49
GO:0002695	BP	GO:0002695	negative regulation of leukocyte activation	49/754	202/18614	9.90826e-25	1.70203e-23	6.0435e-24	ADORA2A/ANXA1/ARG1/AXL/BMP4/BTK/CASP3/CCR2/CD274/CD80/CD86/CEBPB/CTLA4/CX3CL1/ENPP3/ERBB2/FCGR2B/FN1/FOXJ1/FOXP3/HLA-DRB1/HMGB1/HMOX1/IDO1/IFNA2/IFNB1/IL10/IL13RA2/IL2/IL2RA/IL4/IL4R/IRF1/JAK3/LGALS3/LGALS9/MERTK/MIR21/PTPRC/SCGB1A1/SDC4/SFTPD/SHH/SMAD7/SOCS1/SPI1/TBX21/TNFAIP3/ZC3H12A	49
GO:0051216	BP	GO:0051216	cartilage development	49/754	203/18614	1.25722e-24	2.14647e-23	7.62159e-24	ACVRL1/AXIN2/BGN/BMP1/BMP2/BMP4/BMP7/BMPR2/CCN2/CCN4/CD44/CHI3L1/COL1A1/COL3A1/CTNNB1/CTSK/EDN1/EIF2AK3/FGF2/FGF9/GREM1/HIF1A/HMGA2/IL17F/LEP/LOXL2/MAPK14/MAPK3/MIR21/MMP13/PTH/PTPN11/SERPINH1/SMAD1/SMAD3/SMAD7/SNAI1/SNAI2/SOX9/SRF/TGFB1/TGFBI/TGFBR1/TGFBR2/TIMP1/WNT5A/WNT7A/WNT7B/ZEB1	49
GO:1901215	BP	GO:1901215	negative regulation of neuron death	49/754	219/18614	4.64311e-23	7.2026e-22	2.55747e-22	ADORA2A/AKT1/ANGPT1/APOE/ATF4/AXL/BAX/BCL2/BCL2L1/CCL2/CCND1/CD34/CEBPB/CSF1/CSF3/CTNNB1/CX3CL1/CX3CR1/EPO/F2R/GSK3B/HIF1A/HMOX1/IL10/IL13/IL6ST/JAK2/JUN/KDR/KRAS/LGMN/MECP2/MIR200C/NGF/PINK1/PPARA/PPARGC1A/PTK2B/RHOA/ROCK1/SIRT1/SNCA/SOD1/SOD2/TERT/TGFB3/TNFRSF1B/WNT1/WNT3A	49
GO:0048863	BP	GO:0048863	stem cell differentiation	49/754	247/18614	1.17799e-20	1.54853e-19	5.49844e-20	A2M/ABL1/ACE/BCL2/BMP4/BMP7/CDC42/CDH2/CTNNB1/EDN1/EDNRA/EPCAM/ESR1/FGF2/FGFR2/FN1/GATA6/GREM1/GSK3B/HIF1A/HMGA2/ITGB1/KIT/KITLG/LIF/MAPK1/MAPK14/MAPK3/MIR146A/NFE2L2/OSM/PDGFRA/PDX1/PITX2/PTPRC/SEMA7A/SHH/SMAD4/SNAI2/SOX9/SRF/STAT3/TGFB2/TP53/TP63/TWIST1/WNT3A/WNT7A/YAP1	49
GO:0031668	BP	GO:0031668	cellular response to extracellular stimulus	49/754	261/18614	1.37898e-19	1.66071e-18	5.89677e-19	ADORA2B/AIF1/ALB/ATF3/ATF4/ATG5/AXL/BCL2/BECN1/BMPR2/CD68/CDKN1A/COL1A1/CTSK/EIF2AK3/FAS/FOLR2/FOS/FOSL1/FOXO3/GSDMD/HMOX1/HSPA5/IGF1R/IL15/KRT20/LEP/MAP1LC3A/MAP1LC3B/MAPK1/MAPK3/MAPK8/MTOR/NFE2L2/P2RX7/POSTN/PPARA/PRKAA2/PTPRC/RXRA/SIRT1/SLC2A1/SNAI2/SRF/TFEB/TP53/VCAM1/XBP1/ZC3H12A	49
GO:0003007	BP	GO:0003007	heart morphogenesis	49/754	262/18614	1.63263e-19	1.95775e-18	6.9515e-19	ACVRL1/APC/AXIN2/BMP2/BMP4/BMP7/BMPR2/CDC42/CTNNB1/DKK1/EDN1/EDNRA/ELN/ENG/FGFR2/GATA3/GATA6/GSK3A/HAS2/HIF1A/JUN/MDM2/MIR21/MTOR/NOS3/PITX2/PTK2/S1PR1/SHH/SMAD2/SMAD3/SMAD4/SMAD7/SNAI1/SNAI2/SOX9/SRF/TAFAZZIN/TEK/TGFB1/TGFB2/TGFBR1/TGFBR2/TP53/TWIST1/VEGFA/WNT3A/WNT5A/YAP1	49
GO:0048638	BP	GO:0048638	regulation of developmental growth	49/754	328/18614	2.18655e-15	1.84686e-14	6.55774e-15	ABL1/AKT1/APOE/APP/AR/BCL2/BMP4/BMPR2/CDH1/CDKN1A/CREB1/CSF1/CXCL12/CXCR4/DUSP6/EDN1/FGF2/FGF9/FGFR2/FN1/GATA6/GDF15/GLI1/GSK3A/GSK3B/IGF1/IGF2/IL7/LEP/LGMN/MAPK14/MIR29B1/NGF/PPARA/PTEN/SEMA7A/SMAD7/SOD1/SPP1/SRF/STAT3/STAT5A/TGFBR1/TGFBR2/VEGFA/WNT3A/WNT5A/YAP1/YY1	49
GO:0045861	BP	GO:0045861	negative regulation of proteolysis	49/754	330/18614	2.7948e-15	2.33944e-14	8.30679e-15	A2M/ADORA2A/AKT1/APP/CD27/CD44/CST3/CTSB/F2/GAPDH/HGF/IL10/IL1R2/IL9/INS/KLF4/LAMP3/LRP1/LXN/MIR126/MIR29B1/MIR29C/MMP9/NGF/PLAT/PLAU/PLAUR/PTGS2/RENBP/ROCK1/SERPINA1/SERPINE1/SERPINH1/SHH/SNCA/SRC/THBS1/TIMP1/TIMP2/TIMP3/TIMP4/TNF/TNFSF14/TP53/TRIM21/VEGFA/VTN/WNT1/XIAP	49
GO:0007517	BP	GO:0007517	muscle organ development	49/754	351/18614	3.25387e-14	2.54138e-13	9.02381e-14	ACTA1/ATF3/BCL2/BMP2/BMP4/CAV1/CFLAR/COL3A1/CREB1/CTNNB1/CXCL10/DES/DNER/EDNRA/EGR1/ELN/ENG/EP300/FGFR2/FOS/HBEGF/HDAC9/HLF/IGF1/IGF2/ITGB1/KRAS/LEF1/LIF/LOX/MAPK14/MIR145/MYH14/RHOA/S1PR1/SHH/SIRT1/SMAD3/SMAD4/SMAD7/TAFAZZIN/TGFB1/TGFB2/TGFBR1/TWIST1/WNT3A/WNT5A/XBP1/XK	49
GO:0031346	BP	GO:0031346	positive regulation of cell projection organization	49/754	353/18614	4.06562e-14	3.14468e-13	1.1166e-13	ABL1/AGT/ALK/APC/APOE/BMP7/BMPR2/CCL19/CCL21/CCR7/CDC42/CFLAR/CX3CL1/CXCL12/ENPP2/EP300/EPHB2/EPO/F2RL1/FN1/GSK3B/HGF/HSP90AA1/HSPA5/IGF1R/INS/KIT/MAP2K1/MIR200C/MIR21/MTOR/NFE2L2/NGF/OCLN/P2RX7/PIK3R1/PLXNA2/PTK2B/RAC1/S100A9/SEMA7A/SRC/SRF/TGFB3/TGFBR1/VEGFA/WNT1/WNT3A/WNT5A	49
GO:0001654	BP	GO:0001654	eye development	49/754	385/18614	1.13523e-12	7.72455e-12	2.7428e-12	ACVRL1/AQP5/ATF4/ATF6/BAX/BCL2/BMP4/BMP7/BMPR2/CTNNB1/EGFR/EPHB2/FASLG/FAT1/FGF10/FGF2/FGF9/FLT1/GATA3/HIF1A/JUN/KDR/KLF4/LRP5/MERTK/PDGFRA/PDGFRB/PITX2/PROM1/SHH/SMAD3/SOX2/SOX9/SRF/STAT3/TCIRG1/TGFB2/TGFBR1/TGFBR2/THY1/TWIST1/VEGFA/VIM/WNT5A/WNT7A/WNT7B/YY1/ZEB1/ZHX2	49
GO:0030900	BP	GO:0030900	forebrain development	49/754	397/18614	3.56575e-12	2.28208e-11	8.10309e-12	ALK/APP/AXL/B2M/BAX/BMP2/BMP4/CASP3/CDH1/CDH2/COL3A1/CREB1/CSF1R/CTNNB1/CXCL12/CXCR4/DKK1/EGFR/EPHB2/FGF10/FGF2/FGFR2/FUT1/GLI1/GLI2/GSK3B/HIF1A/HPRT1/IGF1R/ITGAM/KRAS/LEF1/LPAR1/NKX2-1/PITX2/PTEN/RHOA/SEMA7A/SHH/SLC2A1/SOX2/SRC/SRF/WNT1/WNT3A/WNT5A/WNT7A/WNT7B/ZEB1	49
GO:0007409	BP	GO:0007409	axonogenesis	49/754	427/18614	5.01976e-11	2.81694e-10	1.00023e-10	ABL1/APOE/APP/B3GNT2/BCL2/BMP7/BMPR2/CDH1/CDH11/CDH2/CREB1/CSF1R/CXCL12/ECE1/EDN1/EDNRA/EFNB2/EPHB2/ERBB2/FGFR2/FN1/FZD3/GATA3/GLI2/GSK3B/HSP90AA1/IGF1R/ITGB1/MAP2K1/NCAM1/NGF/NKX2-1/PLXNA2/PTEN/PTK2/PTPN11/RAC1/S100B/SEMA7A/SHH/SMAD4/SPP1/SRF/THY1/VEGFA/WNT3A/WNT5A/WNT7A/XK	49
GO:0050804	BP	GO:0050804	modulation of chemical synaptic transmission	49/754	487/18614	4.53572e-09	1.99216e-08	7.07366e-09	ABL1/ACE/ADIPOQ/ADORA2A/ADORA2B/AGER/AGT/APOE/APP/ATF4/CA2/CCL2/CCR2/CD38/CDH1/CDH11/CDH2/CX3CL1/CX3CR1/DKK1/EDN1/EPHB2/GSK3B/IL1B/INS/ITGB1/JAK2/KIT/KRAS/LGMN/MAPK1/MAPK3/MECP2/PINK1/PLAT/PTEN/PTGS2/PTK2B/S100B/S1PR2/SNCA/SQSTM1/SRC/SRF/SYT7/TNF/WNT3A/WNT5A/WNT7A	49
GO:0099177	BP	GO:0099177	regulation of trans-synaptic signaling	49/754	488/18614	4.85191e-09	2.1194e-08	7.52545e-09	ABL1/ACE/ADIPOQ/ADORA2A/ADORA2B/AGER/AGT/APOE/APP/ATF4/CA2/CCL2/CCR2/CD38/CDH1/CDH11/CDH2/CX3CL1/CX3CR1/DKK1/EDN1/EPHB2/GSK3B/IL1B/INS/ITGB1/JAK2/KIT/KRAS/LGMN/MAPK1/MAPK3/MECP2/PINK1/PLAT/PTEN/PTGS2/PTK2B/S100B/S1PR2/SNCA/SQSTM1/SRC/SRF/SYT7/TNF/WNT3A/WNT5A/WNT7A	49
GO:0008083	MF	GO:0008083	growth factor activity	49/751	160/18369	1.23862e-29	1.24017e-27	8.49107e-28	AGT/ANGPTL3/BMP1/BMP2/BMP4/BMP7/CCN2/CSF1/CSF2/CSF3/CXCL1/CXCL12/DKK1/EGF/F2/FGF1/FGF10/FGF2/FGF7/FGF9/GDF15/HBEGF/HGF/IGF1/IGF2/IL10/IL11/IL12B/IL2/IL3/IL4/IL5/IL6/IL7/IL9/KITLG/LIF/NGF/OSM/PDGFA/PDGFB/PPBP/TDGF1P3/TGFA/TGFB1/TGFB2/TGFB3/TIMP1/VEGFA	49
GO:0005539	MF	GO:0005539	glycosaminoglycan binding	49/751	232/18369	9.95769e-22	5.31741e-20	3.64067e-20	ALK/ANGPTL3/APOE/APP/BGN/BMP4/BMP7/CCL7/CCL8/CCN2/CCN4/CD44/CXCL10/CXCL11/CXCL13/CXCL6/CXCL8/ELANE/ENG/F2/FGF1/FGF10/FGF2/FGF7/FGF9/FGFR1/FGFR2/FN1/FURIN/HBEGF/LXN/LYVE1/MPO/NLRP3/NOD2/PF4/POSTN/PTPRC/SELL/SELP/SHH/SOD3/TGFBR2/THBS1/TLR2/TREM2/VCAN/VEGFA/VTN	49
GO:1903557	BP	GO:1903557	positive regulation of tumor necrosis factor superfamily cytokine production	48/754	109/18614	7.53994e-38	2.99459e-36	1.0633e-36	AGER/APP/BTK/CCL19/CCL3/CCR2/CD14/CD2/CD86/CYBB/EPHB2/FCGR3A/HMGB1/HSPB1/IFIH1/IFNG/IL12B/IL17A/IL17F/IL1A/IL23A/IL33/IL6/JAK2/LEP/LGALS9/MAPKAPK2/MAVS/MIF/MMP8/MYD88/NOD2/PF4/PIK3R1/PTPN11/PTPRC/PYCARD/RIPK2/STAT3/THBS1/TICAM1/TLR2/TLR3/TLR4/TLR9/TNFRSF8/TWIST1/WNT5A	48
GO:0071346	BP	GO:0071346	cellular response to type II interferon	48/754	116/18614	2.7785e-36	1.02366e-34	3.63476e-35	AIF1/ARG1/CASP1/CCL1/CCL11/CCL13/CCL17/CCL18/CCL19/CCL2/CCL20/CCL21/CCL22/CCL24/CCL26/CCL3/CCL4/CCL5/CCL7/CCL8/CD47/CDC42/CX3CL1/EDN1/FASLG/GAPDH/IFNG/IL12B/IRF1/IRF8/JAK1/JAK2/LGALS9/MRC1/NOS2/PARP9/PPARG/SIRPA/STAT1/TLR2/TLR3/TLR4/TNF/TP53/TXK/TYK2/VIM/WNT5A	48
GO:0051897	BP	GO:0051897	positive regulation of protein kinase B signaling	48/754	118/18614	7.35997e-36	2.57599e-34	9.1467e-35	ANGPT1/AXL/CCL19/CCL21/CCL3/CCR7/CD28/CHI3L1/CSF3/CX3CL1/CX3CR1/EGF/EGFR/ENG/F10/F3/FGF2/FGFR1/GATA3/GDF15/HBEGF/HSP90AA1/IGF1/IGF1R/IGF2/IGFBP5/IL18/INS/ITGB1/LEP/MIR126/MIR21/MIR29A/NOX4/OSM/PDGFA/PIK3CD/PIK3CG/PINK1/PTK2/SRC/TEK/TGFB1/TGFBR1/THBS1/TNF/TNFSF11/TXN	48
GO:0061041	BP	GO:0061041	regulation of wound healing	48/754	137/18614	2.77246e-32	7.92131e-31	2.81266e-31	ACTA2/ALOX5/ANXA1/APCS/APOE/CAV1/CCN4/CD34/CD9/CLDN4/CXCR4/EDN1/EPHB2/F2/F2R/F2RL1/F3/FAP/FGB/FGF2/HBEGF/ITGB1/MIR29A/MIR34A/MMRN1/MTOR/NFE2L2/NOS3/OCLN/PDGFA/PDGFB/PDGFRA/PLAT/PLAU/PLAUR/PLG/PRKCD/PTEN/PTK2/SERPINE1/SMAD3/THBD/THBS1/TNF/TNFAIP3/UBASH3B/VTN/XBP1	48
GO:0050728	BP	GO:0050728	negative regulation of inflammatory response	48/754	187/18614	2.02452e-25	3.63375e-24	1.29025e-24	ADIPOQ/ADORA2A/ALOX5/APCS/APOA1/APOE/CDH5/CX3CL1/CXCL17/ELANE/ENPP3/FCGR2B/FOXP3/FURIN/GATA3/HGF/HLA-DRB1/IGF1/IL10/IL12B/IL13/IL2/IL2RA/IL4/INS/KLF4/MAPK14/MIR126/MIR145/MIR146A/NFKB1/NLRP3/NOD2/NT5E/PPARA/PPARG/PRKCD/PTPRC/SIRPA/SMAD3/SOCS3/SOD1/SRC/TEK/TNFAIP3/TNFRSF1A/TNFRSF1B/TREM2	48
GO:0007179	BP	GO:0007179	transforming growth factor beta receptor signaling pathway	48/754	218/18614	2.71613e-22	4.09982e-21	1.45575e-21	ACVRL1/ADAM17/AXIN1/BMP2/CAV1/CDH5/COL1A2/COL3A1/CREBBP/ENG/EP300/FOS/FURIN/GDF15/HSPA1A/HSPA5/IL17F/ITGB6/JUN/LOX/LTBP1/MAP3K7/MIR21/MIR29B1/NKX2-1/PARP1/PPARA/PPARG/PTK2/SIRT1/SMAD1/SMAD2/SMAD3/SMAD4/SMAD7/SPI1/SRC/STAT3/TGFB1/TGFB2/TGFB3/TGFBR1/TGFBR2/THBS1/TP53/TRIM33/WNT1/ZEB1	48
GO:0045444	BP	GO:0045444	fat cell differentiation	48/754	246/18614	6.10459e-20	7.59682e-19	2.69744e-19	ADIPOQ/AKT1/AKT2/ALOX5/AXIN1/AXIN2/BMP2/BMP7/CCN4/CCND1/CEBPA/CEBPB/CREB1/DDIT3/EP300/FABP4/FGF10/GATA3/HMGA2/IL11/IL6/INS/KLF4/LEP/LRP5/MAFB/MAPK14/MIR21/MIR29B1/MMP11/PDGFRA/PPARG/PPARGC1A/PTGS2/RORC/SIRT1/SMAD3/SNAI2/SOCS1/SOD2/TGFB1/TNF/WNT1/WNT3A/WNT5A/XBP1/YAP1/ZC3H12A	48
GO:0051924	BP	GO:0051924	regulation of calcium ion transport	48/754	266/18614	1.7961e-18	1.97996e-17	7.03033e-18	ABL1/ACE/ADORA2A/AGT/ATG5/BAX/BCL2/CAV1/CCL2/CCL3/CCL4/CCL5/CCR1/CD19/CD4/CTNNB1/CX3CL1/CXCL10/CXCL11/CXCL12/CXCL9/CXCR4/EGF/EPO/F2/F2R/IL13/ITGB3/JAK3/LGALS3/MIR200C/MIR21/MIR34A/MS4A1/NOS3/P2RX7/PDGFB/PDGFRB/PIK3CG/PLA2G1B/PTGS2/PTK2B/RHOA/RRAD/SNCA/THY1/TLR9/UBASH3B	48
GO:0019932	BP	GO:0019932	second-messenger-mediated signaling	48/754	292/18614	8.94946e-17	8.67075e-16	3.07877e-16	ADM/ADORA2B/AGT/AGTR1/AGTR2/AHR/APOE/BTK/CCL20/CCL3/CCL4/CCR5/CCR6/CD4/CREB1/CXCL8/CXCR4/EDN1/EGFR/EIF2AK3/FCGR3A/FPR1/GSK3B/IGF1/INS/KDR/LPAR1/MCU/MTOR/NFATC1/NOS2/NOS3/NPPB/P2RX7/PDX1/PTGDR2/PTK2B/PTPRC/SELE/SELP/SOX9/SPHK1/THBS1/TNF/TNFSF11/TREM2/VCAM1/VEGFA	48
GO:0043588	BP	GO:0043588	skin development	48/754	308/18614	7.86068e-16	6.9762e-15	2.47707e-15	ABCB6/ANXA1/BCL2/CASP3/CFLAR/CLDN4/COL1A1/COL1A2/COL3A1/CTNNB1/DKK1/EGFR/EREG/FGF10/FGF7/FGFR2/FOSL2/FZD3/GATA6/GLI2/IGFBP5/IL17A/IL18/IL1A/IRF6/ITGB6/KLF4/KRT17/KRT5/LGR5/MAFB/MAP2K1/MET/MYD88/PDGFA/RELA/ROCK1/SHH/SMAD4/SNAI1/SOX9/SRF/TGFB2/TNF/TP63/TSG101/WNT5A/YAP1	48
GO:0003002	BP	GO:0003002	regionalization	48/754	422/18614	1.08073e-10	5.83054e-10	2.07028e-10	ACVRL1/AR/AXIN1/AXIN2/BMP1/BMP2/BMP4/BMPR2/C1QA/C3/CTNNB1/DDIT3/DKK1/EDN1/ENG/EP300/FGF1/FGF10/FGF2/FGFR2/FOXJ1/GLI1/GLI2/GREM1/HIF1A/ITGAM/LEF1/LRP5/MAFB/NKX2-1/PITX2/PLXNA2/SHH/SMAD2/SMAD3/SMAD4/SNAI1/SRF/TGFBR1/TGFBR2/TP53/TP63/WNT1/WNT3A/WNT5A/WNT7A/WNT7B/YY1	48
GO:0010975	BP	GO:0010975	regulation of neuron projection development	48/754	452/18614	1.11706e-09	5.35577e-09	1.9017e-09	ABL1/AGT/AKT1/ALK/APOE/B2M/BMP7/BMPR2/CD38/CDH1/CDH2/CFLAR/CX3CL1/CXCL12/DKK1/EFNB2/EP300/EPHB2/EPO/FN1/GATA3/GSK3A/GSK3B/HGF/HSPA5/IGF1R/KLF4/LPAR1/MAP2K1/MIR200C/NFE2L2/NGF/PLXNA2/PTEN/PTK2B/RHOA/S100A9/SDC2/SEMA7A/SPP1/SRF/THY1/VEGFA/VIM/WNT3A/WNT5A/WNT7A/XK	48
GO:0045177	CC	GO:0045177	apical part of cell	48/756	446/19518	1.64778e-10	3.02533e-09	2.15079e-09	ACE2/ADAM17/AGER/ANXA1/APP/AQP5/C5AR1/CA2/CD34/CD44/CDC42/CDH2/CFTR/CLDN4/CTNNB1/CTSB/CTSK/CTSL/DPP4/ENPP3/EPCAM/ERBB2/FAP/FAT1/FN1/FZD3/HSP90AA1/IGFBP2/IL6R/ITGB3/KL/LGMN/MUC1/OCLN/PDGFRB/PDPN/PLAT/PROM1/PTEN/REN/SLC2A1/TCIRG1/TEK/TF/THY1/TJP1/TLR9/VCAM1	48
GO:0044389	MF	GO:0044389	ubiquitin-like protein ligase binding	48/751	320/18369	5.10339e-15	1.70326e-13	1.16617e-13	AICDA/APC/ATF6/AXIN1/AXIN2/BCL2/BECN1/BID/CASP8/CD40/CDKN1A/CEBPB/CXCR4/EGFR/GSK3B/HIF1A/HSP90AA1/HSPA1A/HSPA5/ISG15/JAK1/JUN/LTBR/MAP1LC3A/MAP1LC3B/MDM2/NFKBIA/PARP9/PINK1/PPARGC1A/PTK2B/RELA/SMAD2/SMAD3/SMAD7/SQSTM1/STAT1/STAT2/STING1/TNFRSF1B/TOLLIP/TP53/TRAF3/TRAF6/TRIM37/TSG101/TUBA1B/UBASH3B	48
GO:0071887	BP	GO:0071887	leukocyte apoptotic process	47/754	117/18614	7.84325e-35	2.56855e-33	9.12028e-34	ADAM17/AKT1/ANXA1/AXL/BAX/BCL2/BCL2L1/BMP4/BTK/CASP3/CASP7/CASP9/CCL19/CCL21/CCL5/CCR7/CD27/CD274/CDKN2A/CTSL/CXCL12/CXCR2/FAS/FASLG/HIF1A/IDO1/IL10/IL2/IL2RA/IL6/IL7R/IRF3/IRF7/JAK3/KITLG/LGALS3/LGALS9/MERTK/MIF/NOD2/P2RX7/PDCD1/PIK3CD/RIPK3/SIRT1/TP53/WNT5A	47
GO:2001236	BP	GO:2001236	regulation of extrinsic apoptotic signaling pathway	47/754	156/18614	2.76925e-28	5.87417e-27	2.08577e-27	AGT/AGTR2/AKT1/AR/ATF3/BCL2/BCL2L1/BID/BMP4/CAV1/CFLAR/CSF2/CX3CL1/FGB/FGF10/FGFR1/GSK3B/HGF/HMOX1/HSPA1A/ICAM1/IGF1/IL1A/IL1B/IL4/IL7/ITGAV/LGALS3/LTBR/MCL1/NOS3/PF4/PTEN/PTPRC/PYCARD/RELA/SERPINE1/SNAI2/SRC/TERT/TGFBR1/THBS1/TIMP3/TNF/TNFAIP3/TNFSF10/YAP1	47
GO:0001959	BP	GO:0001959	regulation of cytokine-mediated signaling pathway	47/754	165/18614	4.39586e-27	8.72937e-26	3.09958e-26	ADAM17/ADAR/ADIPOQ/ANGPT1/APOA1/ARG1/AXL/CASP1/CASP8/CAV1/CCL5/CSF1/CXCR4/EDN1/F2RL1/HIF1A/HSPA1A/IL1R1/IL1R2/IL1RN/IL6/IL7/IRAK3/IRF3/IRF7/ISG15/MAVS/MIR21/MIR29B1/MMP12/PARP9/PPARG/PTPN11/PTPRC/PYCARD/RIPK2/SPHK1/STAT2/STING1/TBK1/TNFAIP3/TNFRSF1A/TREM2/TSLP/TXK/WNT5A/XIAP	47
GO:0001837	BP	GO:0001837	epithelial to mesenchymal transition	47/754	172/18614	3.29553e-26	6.21379e-25	2.20636e-25	AXIN2/BMP2/BMP4/BMP7/COL1A1/CTNNB1/EDN1/EDNRA/ENG/FGFR1/FGFR2/GATA3/GREM1/GSK3B/HAS2/HGF/HIF1A/HMGA2/IGF1/IL1B/IL6/LEF1/LOXL2/MIR145/MIR21/MIR29B1/MTOR/NKX2-1/PDPN/PTEN/PTK2/ROCK1/S100A4/SMAD2/SMAD3/SMAD4/SMAD7/SNAI1/SNAI2/SOX9/TGFB1/TGFB2/TGFB3/TGFBR1/TGFBR2/TWIST1/WNT5A	47
GO:0002758	BP	GO:0002758	innate immune response-activating signaling pathway	47/754	209/18614	2.89979e-22	4.36527e-21	1.55e-21	AIM2/BTK/CASP1/CAV1/CD14/CD40/CREBBP/EP300/ESR1/F2RL1/FCN1/HMGB1/HSPA1A/IFIH1/IRAK3/IRF1/IRF3/IRF4/IRF7/MAP2K6/MAP3K7/MAPKAPK2/MIR146A/MYD88/NFKBIA/NLRC4/NLRP1/NLRP3/NOD2/PYCARD/RELA/RIPK2/SRC/TICAM1/TLR2/TLR3/TLR4/TLR5/TLR7/TLR8/TLR9/TNF/TNFAIP3/TRAF3/TRAF6/TREM2/XIAP	47
GO:0019955	MF	GO:0019955	cytokine binding	47/751	130/18369	3.52934e-32	4.71166e-30	3.22594e-30	A2M/ACVRL1/BMPR2/CCR1/CCR3/CCR5/CCR6/CCR7/CD4/CSF1R/CX3CR1/CXCR1/CXCR2/CXCR3/CXCR4/ELANE/ENG/FGF2/GREM1/HMGB1/IFNAR1/IL10RA/IL12B/IL13RA1/IL13RA2/IL17F/IL1R1/IL1R2/IL1RL1/IL1RN/IL2RA/IL2RB/IL3RA/IL6R/IL6ST/ITGAV/ITGB1/ITGB3/KIT/LTBP1/PDPN/TGFB3/TGFBR1/TGFBR2/THBS1/TNFRSF1A/TNFRSF1B	47
GO:0002690	BP	GO:0002690	positive regulation of leukocyte chemotaxis	46/754	96/18614	2.0335e-38	8.37323e-37	2.97313e-37	ADAM10/ADAM17/AIF1/C5AR1/CCL1/CCL19/CCL21/CCL3/CCL4/CCL5/CCL7/CCR1/CCR2/CCR6/CCR7/CSF1/CSF1R/CX3CR1/CXCL10/CXCL12/CXCL13/CXCL17/CXCL8/CXCR2/EDN1/F2RL1/HMGB1/IL23A/IL4/IL6/IL6R/LGALS9/LGMN/MAPK1/MAPK3/MCU/PLA2G7/PTK2/PTK2B/RAC1/SERPINE1/SPI1/THBS1/TNFSF14/VEGFA/WNT5A	46
GO:0032760	BP	GO:0032760	positive regulation of tumor necrosis factor production	46/754	105/18614	3.4512e-36	1.25498e-34	4.45613e-35	AGER/APP/BTK/CCL19/CCL3/CCR2/CD14/CD2/CYBB/EPHB2/FCGR3A/HMGB1/HSPB1/IFIH1/IFNG/IL12B/IL17A/IL1A/IL23A/IL33/IL6/JAK2/LEP/LGALS9/MAPKAPK2/MAVS/MIF/MMP8/MYD88/NOD2/PF4/PIK3R1/PTPN11/PTPRC/PYCARD/RIPK2/STAT3/THBS1/TICAM1/TLR2/TLR3/TLR4/TLR9/TNFRSF8/TWIST1/WNT5A	46
GO:0042102	BP	GO:0042102	positive regulation of T cell proliferation	46/754	105/18614	3.4512e-36	1.25498e-34	4.45613e-35	AGER/AIF1/ANXA1/CCL19/CCL5/CCR2/CD209/CD274/CD28/CD40LG/CD80/CD86/EPO/FOXP3/HMGB1/IGF1/IGF2/IGFBP2/IL12B/IL15/IL18/IL1A/IL1B/IL2/IL21/IL23A/IL2RA/IL4/IL6/IL6ST/JAK2/JAK3/KITLG/LEP/LGALS9/MIR21/PTPRC/PYCARD/RIPK2/SHH/TFRC/TGFBR2/TNFSF13B/TRAF6/TYK2/VCAM1	46
GO:0002286	BP	GO:0002286	T cell activation involved in immune response	46/754	119/18614	3.2369e-33	9.6934e-32	3.44188e-32	ANXA1/CCL19/CD1C/CD80/CD86/F2RL1/FCGR2B/FOXP3/GATA3/HLA-DRA/HLA-DRB1/HMGB1/ICAM1/IFNA1/IFNA2/IFNB1/IFNG/IL12B/IL18/IL2/IL21/IL23A/IL27/IL4/IL4R/IL6/IL6R/IRF4/ITGAL/JAK3/JUNB/LEF1/LGALS3/LGALS9/MIR21/MTOR/MYB/NLRP3/RIPK2/RORC/SMAD7/STAT3/STAT6/TBX21/TP53/ZC3H12A	46
GO:0072676	BP	GO:0072676	lymphocyte migration	46/754	122/18614	1.21247e-32	3.53636e-31	1.25567e-31	ABL1/ADAM10/ADAM17/AIF1/AKT1/APP/CCL1/CCL11/CCL13/CCL17/CCL18/CCL19/CCL2/CCL20/CCL21/CCL22/CCL24/CCL26/CCL3/CCL4/CCL5/CCL7/CCL8/CCR2/CCR6/CCR7/CX3CL1/CXCL10/CXCL11/CXCL12/CXCL13/CXCL16/FUT4/GATA3/ITGAL/ITGB3/PIK3CD/PIK3CG/PTK2B/PYCARD/RHOA/RIPK3/S1PR1/TBX21/TNFSF14/WNT5A	46
GO:0034614	BP	GO:0034614	cellular response to reactive oxygen species	46/754	152/18614	8.43156e-28	1.70458e-26	6.05253e-27	ABL1/AKT1/ANXA1/ARG1/AXL/BECN1/BMP7/BTK/CAT/CHUK/EDN1/EGFR/ERN1/FOS/HGF/IL10/IL6/JUN/KDM6B/MAP1LC3A/MAPK1/MAPK3/MAPK8/MET/MIR21/MIR34A/MMP2/MMP9/MPO/NFE2L2/NOS3/PDGFRA/PINK1/PRKCD/RELA/RIPK3/SIRPA/SIRT1/SOD1/SOD2/SOD3/SPHK1/SRC/STAT6/TNFAIP3/TXN	46
GO:0051701	BP	GO:0051701	biological process involved in interaction with host	46/754	206/18614	1.11246e-21	1.59329e-20	5.65737e-21	ACE2/AGTR1/ANPEP/APCS/AXL/BCL2L1/BECN1/BSG/CAV1/CCR5/CD209/CD4/CD80/CD86/CTSB/CTSL/CXCL8/CXCR4/DPP4/EFNB2/EGFR/FCN1/FURIN/HLA-DRB1/HMGB1/HSPA1A/ICAM1/IFNA2/ITGAV/ITGB1/ITGB3/ITGB6/LAMP1/LGALS1/LGALS9/MRC1/NCAM1/PTX3/SFTPD/SIGLEC1/SMPD1/SRC/TFRC/TMPRSS2/TRIM21/TSG101	46
GO:0002064	BP	GO:0002064	epithelial cell development	46/754	210/18614	2.58753e-21	3.59557e-20	1.2767e-20	ACTA2/ADIPOQ/AKT1/AR/ATF4/BMP4/CDH2/CDH5/CEBPA/CXCR4/EDNRA/ESR1/F2RL1/FASN/FAT1/FOSL2/FOXJ1/FOXP3/GSK3A/GSK3B/HIF1A/ICAM1/IL1A/IL1B/IL6ST/KDR/MET/MIR29B1/MYD88/PDGFB/PECAM1/ROCK1/S1PR2/SDC1/SOX9/SRC/TJP1/TNF/TNFRSF1A/TP63/VEGFA/VIM/WNT5A/WNT7A/WNT7B/YAP1	46
GO:0032868	BP	GO:0032868	response to insulin	46/754	272/18614	1.29259e-16	1.23524e-15	4.38601e-16	ADIPOQ/ADM/AGT/AKT1/AKT2/APC/BCAR1/CAT/CFLAR/COL1A1/CTSD/CTSK/EGR1/FOS/GPT/GSK3A/GSK3B/HDAC9/IGF1R/IGF2/IGFBP1/IL10/IL1B/INS/LEP/MAPK1/MAPK14/MAPK3/MTOR/MZB1/PARP1/PIK3R1/PLA2G1B/PPARA/PPARG/PRKCD/PTPN11/SIRT1/SLC2A1/SOCS1/SOCS3/SRC/STAT1/TLR2/TNFSF10/XBP1	46
GO:0048511	BP	GO:0048511	rhythmic process	46/754	303/18614	8.73216e-15	7.05629e-14	2.50551e-14	A2M/ADIPOQ/ADORA2A/AHR/ATF4/AXL/CASP3/CLDN4/CREB1/CREBBP/CSF2/EGR1/EP300/EREG/ESR1/GSK3B/HAS2/HLF/HSPA5/IGF1R/LEP/MAP2K6/MAPK8/MMP2/MTOR/NKX2-1/NOS2/NOS3/PARP1/PDGFRA/PPARA/PPARG/PPARGC1A/PRKAA2/PTEN/PTGDS/PTX3/RORC/SIRT1/SRC/TGFB2/TGFB3/TIMP4/TNF/TP53/TWIST1	46
GO:0071692	BP	GO:0071692	protein localization to extracellular region	46/754	382/18614	3.89578e-11	2.21261e-10	7.85644e-11	ADORA2A/ALOX5/ANXA1/APOE/CCL5/CD38/CFTR/F2/F2R/F2RL1/FGB/HIF1A/HLA-DRB1/IFNG/IGF1/IL12B/IL13/IL1A/IL1B/IL1RN/IL6/INS/JAK2/KRT20/LEP/LRP5/LTBP1/MCU/MIR146A/MIR29B1/NOS2/P2RX7/PDX1/PLA2G1B/PPARG/PTPN11/SMAD2/SYT7/TCIRG1/TGFB1/TGFB2/TGFB3/TLR2/TLR4/TNF/TREM2	46
GO:0034765	BP	GO:0034765	regulation of monoatomic ion transmembrane transport	46/754	478/18614	5.26648e-08	1.98201e-07	7.03762e-08	ABL1/ATG5/BAX/BCL2/CAV1/CCL2/CCR2/CD19/CD63/CFTR/CX3CL1/CXCL10/CXCL11/CXCL9/CYBB/EDN1/EDNRA/EPHB2/EPO/F2/F2R/GRP/IFNG/IL13/ITGB1/ITGB3/KCNMB1/MIR200C/MIR21/MIR29B1/MMP9/MS4A1/NOX1/P2RX7/PIK3CG/PINK1/PLA2G1B/PTK2B/RRAD/SNCA/TCIRG1/THY1/TLR9/TREM2/TWIST1/UBASH3B	46
GO:0048661	BP	GO:0048661	positive regulation of smooth muscle cell proliferation	45/754	99/18614	2.60351e-36	9.6554e-35	3.42839e-35	AGT/AIF1/AKT1/BMP4/CCL5/CCN4/CX3CL1/EDN1/ELANE/EREG/ERN1/FGF2/FGF9/FGFR2/HBEGF/HMOX1/IGF1/IGF1R/IGFBP5/IL10/IL13/IL18/IL6/IL6R/ITGB3/JAK2/JUN/MIR146A/MIR21/MMP2/MMP9/MYD88/NOX1/PDGFB/PDGFRB/PTGS2/S1PR1/SRC/STAT1/TERT/TGFB1/TGFBR2/THBS1/TLR4/TNF	45
GO:0043406	BP	GO:0043406	positive regulation of MAP kinase activity	45/754	117/18614	2.10109e-32	6.03391e-31	2.14249e-31	AGER/AXIN1/CCL19/CD40/DKK1/EDN1/EGF/EGFR/ELANE/ERBB2/ERN1/FGF1/FGF2/FGFR1/FLT1/FLT3/IL1B/KIT/KITLG/MAP2K6/MAP2K7/MAP3K7/MIF/NOD2/NOX4/P2RX7/PDGFA/PDGFB/PDGFRB/PIK3CG/PLA2G1B/PTK2B/PTPRC/S100A12/SRC/TGFA/TGFB1/THBS1/TLR4/TLR9/TNF/TNFSF11/TRAF6/VEGFA/WNT5A	45
GO:0032609	BP	GO:0032609	type II interferon production	45/754	118/18614	3.26913e-32	9.19955e-31	3.26653e-31	ABL1/AXL/CCR2/CCR7/CD14/CD2/CD274/CD47/DDIT3/F2RL1/FOXP3/GATA3/HLA-DRB1/HMGB1/IL10/IL12B/IL18/IL1B/IL1R1/IL1RL1/IL2/IL21/IL23A/IL27/IL33/IRF8/ISG15/JAK2/LGALS9/NOD2/PYCARD/RIPK2/RIPK3/SCGB1A1/SIRPA/TLR3/TLR4/TLR7/TLR8/TLR9/TNF/TXK/TYK2/WNT5A/ZC3H12A	45
GO:0032649	BP	GO:0032649	regulation of type II interferon production	45/754	118/18614	3.26913e-32	9.19955e-31	3.26653e-31	ABL1/AXL/CCR2/CCR7/CD14/CD2/CD274/CD47/DDIT3/F2RL1/FOXP3/GATA3/HLA-DRB1/HMGB1/IL10/IL12B/IL18/IL1B/IL1R1/IL1RL1/IL2/IL21/IL23A/IL27/IL33/IRF8/ISG15/JAK2/LGALS9/NOD2/PYCARD/RIPK2/RIPK3/SCGB1A1/SIRPA/TLR3/TLR4/TLR7/TLR8/TLR9/TNF/TXK/TYK2/WNT5A/ZC3H12A	45
GO:0046632	BP	GO:0046632	alpha-beta T cell differentiation	45/754	119/18614	5.06027e-32	1.39594e-30	4.95662e-31	ABL1/ANXA1/BCL2/CCL19/CD80/CD86/CTSL/FOXP3/GATA3/HLA-DRA/HLA-DRB1/HMGB1/IFNG/IL12B/IL18/IL2/IL21/IL23A/IL27/IL4/IL4R/IL6/IL6R/IRF1/IRF4/ITK/JAK3/JUNB/LEF1/LGALS9/MIR21/MTOR/MYB/NLRP3/RHOA/RIPK2/RORC/SHH/SMAD7/SOCS1/STAT3/STAT6/TBX21/TGFBR2/ZC3H12A	45
GO:0022612	BP	GO:0022612	gland morphogenesis	45/754	123/18614	2.76469e-31	7.20106e-30	2.55692e-30	AR/AREG/ARG1/BAX/BCL2/BMP4/BMP7/CAV1/CCL11/CEBPB/CFLAR/CSF1/CSF1R/EGFR/ESR1/FGF1/FGF10/FGF7/FGFR2/GLI1/HGF/IGFBP5/IL6/LRP5/MMP2/NFKB1/NR3C1/PDGFA/SHH/SNAI2/SOX9/SRC/STAT6/TGFA/TGFB1/TGFB2/TGFB3/TGFBR2/TNC/TNF/TNFAIP3/TP63/WNT3A/WNT5A/XBP1	45
GO:0002821	BP	GO:0002821	positive regulation of adaptive immune response	45/754	129/18614	3.07691e-30	7.52433e-29	2.6717e-29	B2M/BTK/C3/CCR2/CD1A/CD1C/CD274/CD28/CD4/CD40/FCER2/FCGR1A/FOXP3/GATA3/HLA-DRA/HLA-DRB1/IL12B/IL18/IL1B/IL1R1/IL2/IL23A/IL4/IL6/IL6ST/JAK2/MAP3K7/MIR21/NLRP3/NOD2/P2RX7/PLA2G4A/PTPRC/PYCARD/RIPK2/SIRT1/STAT6/TBX21/TFRC/TGFB1/TNF/TNFSF13B/TRAF6/TREM2/TYK2	45
GO:0032612	BP	GO:0032612	interleukin-1 production	45/754	131/18614	6.64131e-30	1.5759e-28	5.59564e-29	AGER/AIM2/ANXA1/APOA1/APP/CASP1/CASP8/CCL19/CCL3/CCR7/CX3CL1/CX3CR1/EGR1/F2R/F2RL1/GSDMD/HMGB1/HSPB1/IFNG/IGF1/IL10/IL17A/IL1R2/IL6/JAK2/LGALS9/MYD88/NLRC4/NLRP1/NLRP3/NOD2/P2RX7/PYCARD/RIPK2/SIRPA/SMAD3/SPHK1/STAT3/TLR4/TLR8/TNF/TNFAIP3/TREM2/WNT5A/ZC3H12A	45
GO:0032652	BP	GO:0032652	regulation of interleukin-1 production	45/754	131/18614	6.64131e-30	1.5759e-28	5.59564e-29	AGER/AIM2/ANXA1/APOA1/APP/CASP1/CASP8/CCL19/CCL3/CCR7/CX3CL1/CX3CR1/EGR1/F2R/F2RL1/GSDMD/HMGB1/HSPB1/IFNG/IGF1/IL10/IL17A/IL1R2/IL6/JAK2/LGALS9/MYD88/NLRC4/NLRP1/NLRP3/NOD2/P2RX7/PYCARD/RIPK2/SIRPA/SMAD3/SPHK1/STAT3/TLR4/TLR8/TNF/TNFAIP3/TREM2/WNT5A/ZC3H12A	45
GO:1904019	BP	GO:1904019	epithelial cell apoptotic process	45/754	140/18614	1.75534e-28	3.79532e-27	1.34762e-27	ABL1/ADAR/ANGPT1/BAX/BCL2/BCL2L1/BID/BMPR2/CASP3/CASP9/CCL2/CD40/CD40LG/CDH5/CFLAR/EDNRA/ESR1/FASLG/FGB/GATA3/HMOX1/ICAM1/IGF1R/IL10/IL13/IL4/IL6/JAK2/KDR/KRT8/LEF1/MIR126/NFE2L2/PDX1/PIK3CG/PLA2G1B/PPARA/SERPINE1/TEK/TERT/TGFBR2/THBS1/TNF/TNFAIP3/YAP1	45
GO:0038061	BP	GO:0038061	NIK/NF-kappaB signaling	45/754	142/18614	3.49667e-28	7.32222e-27	2.59994e-27	AGER/AKT1/ALK/APP/BMP7/CCL19/CD14/CD27/CD86/CHI3L1/CHUK/EDN1/EGFR/EP300/GREM1/IL12B/IL18/IL1B/IL23A/LGALS9/MAP3K7/MIR146A/MIR21/MIR29B1/MMP8/NFKB1/NFKBIA/NLRP3/NOD2/RELA/RHOA/RIPK3/SPHK1/SPI1/TLR2/TLR3/TLR4/TLR7/TLR9/TNF/TNFRSF10B/TNFSF14/TRAF6/TREM2/ZC3H12A	45
GO:0045834	BP	GO:0045834	positive regulation of lipid metabolic process	45/754	151/18614	6.65987e-27	1.31321e-25	4.6629e-26	ADIPOQ/ADM/AKT1/AKT2/ANGPTL3/ANXA1/APOA1/APOE/CCL19/CCL21/CCR7/CD19/CDC42/CREB1/F2/FGF1/FGF2/FLT1/FLT3/IFNG/IGF1R/IL1A/IL1B/INS/KIT/MIR29B1/MTOR/NOD2/PDGFB/PDGFRA/PDGFRB/PPARA/PPARGC1A/PRKCD/PTGS2/PTK2/PTK2B/SIRT3/SRC/STAR/TAFAZZIN/TEK/TGFB1/TNF/TWIST1	45
GO:0031960	BP	GO:0031960	response to corticosteroid	45/754	166/18614	5.54898e-25	9.68047e-24	3.43729e-24	A2M/ABCA3/ACE/ADIPOQ/ADM/AIF1/ANXA1/AREG/ARG1/AXIN2/BCL2/CASP3/CASP9/CCN2/CCND1/CFLAR/COL1A1/CYBB/EDN1/ENG/EPO/FLT3/FOS/FOSL1/GLB1/GSK3A/IGF1R/IGFBP2/IL10/IL1RN/IL22/IL6/JAK2/NR3C1/PARP1/PDX1/PLAT/PTGDS/PTGS2/RHOA/SCGB1A1/SDC1/SRC/TNF/WNT7B	45
GO:2001242	BP	GO:2001242	regulation of intrinsic apoptotic signaling pathway	45/754	173/18614	3.65566e-24	6.07468e-23	2.15697e-23	AKT1/BAX/BBC3/BCL2/BCL2L1/BECN1/BID/CAV1/CD44/CXCL12/DDIT3/EIF2AK3/EPO/HIF1A/HSPA1A/HSPB1/INS/LCK/MCL1/MDM2/MIF/MIR21/MMP9/MUC1/MYC/NFE2L2/NOX1/PARP1/PDX1/PINK1/PLAUR/PTGS2/PYCARD/RIPK3/S100A8/S100A9/SIRT1/SNAI1/SNAI2/SOD1/SOD2/SRC/TP53/TREM2/XBP1	45
GO:1905952	BP	GO:1905952	regulation of lipid localization	45/754	182/18614	3.57249e-23	5.57268e-22	1.97872e-22	ABCA3/ADIPOQ/AGT/AGTR1/AKT1/AKT2/APOA1/APOE/C3/CAV1/CRP/EDN1/EGF/FASLG/FURIN/IL1A/IL1B/IL6/ITGAV/ITGB3/LEP/LRP1/MAP2K6/MIF/MIR146A/MIR34A/MSR1/NFKB1/NFKBIA/P2RX7/PLA2G4A/PPARA/PPARG/PRKCD/PTPN11/REN/RXRA/SHH/SIRT1/SPP1/THBS1/TNF/TNFSF11/TREM2/ZC3H12A	45
GO:0044703	BP	GO:0044703	multi-organism reproductive process	45/754	207/18614	9.80363e-21	1.29177e-19	4.58676e-20	ACE/ACE2/ADM/AGT/AKT1/ANGPT2/AR/ARG1/BCL2/BMPR2/BSG/CALCA/CD38/CLDN4/CTSB/EDN1/EPO/ESR1/FOS/FOSL1/IDO1/IGFBP2/IGFBP5/IL1B/ITGB3/JUNB/LEP/LGALS9/LIF/MIR21/MMP2/MMP9/PARP1/PLA2G4C/PTGS2/SCGB1A1/SLC2A1/SOD1/SPP1/TAC1/TGFB3/TGFBR2/THBD/TIMP1/VEGFA	45
GO:0044706	BP	GO:0044706	multi-multicellular organism process	45/754	216/18614	5.95052e-20	7.42158e-19	2.63522e-19	ACE/ACE2/ADM/AGT/AKT1/ANGPT2/AR/ARG1/BCL2/BMPR2/BSG/CALCA/CD38/CLDN4/CTSB/EDN1/EPO/ESR1/FOS/FOSL1/IDO1/IGFBP2/IGFBP5/IL1B/ITGB3/JUNB/LEP/LGALS9/LIF/MIR21/MMP2/MMP9/PARP1/PLA2G4C/PTGS2/SCGB1A1/SLC2A1/SOD1/SPP1/TAC1/TGFB3/TGFBR2/THBD/TIMP1/VEGFA	45
GO:0010810	BP	GO:0010810	regulation of cell-substrate adhesion	45/754	222/18614	1.87366e-19	2.23292e-18	7.92853e-19	ABL1/ACVRL1/ANGPT2/APOA1/BCL2/CCL21/CCR7/CDC42/CDKN2A/COL1A1/CSF1/CX3CL1/FGB/FN1/FUT1/GREM1/GSK3B/HAS2/ITGB3/JAK2/KDR/MIR29C/MMP12/MMP14/PDGFB/PDPN/PIK3R1/PLAU/PLG/PTEN/PTK2/PTK2B/RAC1/RHOA/ROCK1/SDC4/SERPINE1/SMAD3/SRC/TEK/THBS1/THY1/VEGFA/VTN/WNT1	45
GO:0048738	BP	GO:0048738	cardiac muscle tissue development	45/754	243/18614	7.62552e-18	7.9968e-17	2.83947e-17	ABL1/AGT/ATG5/BMP2/BMP4/BMP7/CDC42/CREB1/DKK1/EDN1/EDNRA/EFNB2/ENG/FGF2/FGF9/FGFR2/GATA6/GLI1/GREM1/GSK3A/IGF1/ITGB1/KDM6B/MAPK14/MTOR/NOX4/NPPB/PDGFRA/PDGFRB/PPARA/S1PR1/SMAD1/SMAD4/SMAD7/SRF/TAFAZZIN/TGFB1/TGFB2/TGFBR1/TGFBR2/VEGFA/WNT3A/WNT5A/YAP1/YY1	45
GO:0051054	BP	GO:0051054	positive regulation of DNA metabolic process	45/754	303/18614	3.89466e-14	3.02498e-13	1.0741e-13	ACTB/AKT1/BAX/CD28/CD40/CTNNB1/EGF/EGFR/EREG/FGF10/FGF2/FOXM1/GLI1/GLI2/GREM1/HGF/HMGB1/HSP90AA1/IGF1R/IL2/IL4/IL6/KLF4/MAP2K7/MAPK1/MAPK3/MECP2/MYC/NOX4/PARP1/PDGFB/PDGFRB/PPARGC1A/PRKCD/PTK2B/PTPRC/RTEL1/SIRT1/SRC/STAT6/TBX21/TFRC/TGFB1/TNF/YY1	45
GO:0021700	BP	GO:0021700	developmental maturation	45/754	319/18614	2.56042e-13	1.8525e-12	6.57777e-13	ACVRL1/APP/AXL/BCL2/BMP2/BTK/C1QA/C3/CCL19/CCL21/CCR6/CD63/CDH5/CEBPA/CFTR/CTNNB1/CX3CL1/CX3CR1/DDIT3/EDN1/EDNRA/EPO/EREG/GATA3/GREM1/HIF1A/IGF1/IL15/IL21/KDR/LEP/MECP2/MMP2/PPARG/PTEN/PTH/PTK2B/REN/RHOA/ROCK1/S1PR1/TGFB2/VEGFA/WNT1/WNT5A	45
GO:0009895	BP	GO:0009895	negative regulation of catabolic process	45/754	337/18614	1.82086e-12	1.20104e-11	4.26459e-12	AKT1/ALK/AXIN2/BCL2/BECN1/CST3/EGFR/FURIN/GSK3A/HGF/HMOX1/IL10/IL10RA/IL1B/INS/IRAK3/LAMP3/LEP/MAPK14/MAPKAPK2/MCL1/MET/MIR146A/MIR21/MTOR/MYD88/NOS2/PIK3CG/PINK1/PPARA/RELA/ROCK1/SHH/SMAD3/SMAD4/SNCA/STAT3/TIMP1/TIMP2/TIMP3/TIMP4/TNF/TP53/TREM2/WNT1	45
GO:0045787	BP	GO:0045787	positive regulation of cell cycle	45/754	354/18614	1.0132e-11	6.20776e-11	2.20422e-11	ABL1/ADAM17/AIF1/AKT1/ANXA1/APP/BECN1/CCN2/CCND1/CD28/CDC42/CXCR5/EDN1/EGF/EGFR/EREG/FGF10/FGFR2/FOSL1/GLI1/IGF1/IGF1R/IGF2/IL10/IL1A/IL1B/INS/LGMN/LRP5/MDM2/MECP2/MIR29A/NUP62/PDGFB/PDGFRB/PTPN11/RHOA/SPHK1/SRC/TERT/TGFA/TGFB2/TNF/TRIM21/WNT5A	45
GO:0042176	BP	GO:0042176	regulation of protein catabolic process	45/754	361/18614	1.98299e-11	1.17635e-10	4.17694e-11	AKT1/APC/APOE/AXIN1/AXIN2/CAV1/CDH1/CEBPA/CST3/EGFR/FURIN/GSK3A/GSK3B/HSP90AA1/HSPA1A/IFNG/IL10/IL1B/IL33/INS/IRAK3/KEAP1/LAMP3/LRP1/MDM2/NFE2L2/NOS2/PINK1/RELA/ROCK1/SHH/SMAD3/SMAD4/SMAD7/SNCA/SOX9/TIMP1/TIMP2/TIMP3/TIMP4/TNF/TNFAIP3/TNFRSF1B/TREM2/WNT5A	45
GO:0009306	BP	GO:0009306	protein secretion	45/754	373/18614	5.99695e-11	3.34158e-10	1.18651e-10	ADORA2A/ALOX5/ANXA1/APOE/CCL5/CD38/CFTR/F2/F2R/F2RL1/FGB/HIF1A/HLA-DRB1/IFNG/IGF1/IL12B/IL13/IL1A/IL1B/IL1RN/IL6/INS/JAK2/KRT20/LEP/LRP5/MCU/MIR146A/MIR29B1/NOS2/P2RX7/PDX1/PLA2G1B/PPARG/PTPN11/SMAD2/SYT7/TCIRG1/TGFB1/TGFB2/TGFB3/TLR2/TLR4/TNF/TREM2	45
GO:0035592	BP	GO:0035592	establishment of protein localization to extracellular region	45/754	374/18614	6.56027e-11	3.64098e-10	1.29282e-10	ADORA2A/ALOX5/ANXA1/APOE/CCL5/CD38/CFTR/F2/F2R/F2RL1/FGB/HIF1A/HLA-DRB1/IFNG/IGF1/IL12B/IL13/IL1A/IL1B/IL1RN/IL6/INS/JAK2/KRT20/LEP/LRP5/MCU/MIR146A/MIR29B1/NOS2/P2RX7/PDX1/PLA2G1B/PPARG/PTPN11/SMAD2/SYT7/TCIRG1/TGFB1/TGFB2/TGFB3/TLR2/TLR4/TNF/TREM2	45
GO:0032970	BP	GO:0032970	regulation of actin filament-based process	45/754	387/18614	2.04026e-10	1.0708e-09	3.80216e-10	ABL1/ACTA2/APOA1/CAV1/CCL11/CCL21/CCL24/CCL26/CCN2/CCR7/CD47/CDC42/CSF1R/CSF3/CX3CL1/CXCL12/EDN1/ELN/F2RL1/IL1A/ITGB3/LPAR1/LRP1/MET/MIR21/MTOR/PDGFA/PDGFRA/PDGFRB/PDPN/PIK3R1/PRKCD/PTK2B/PYCARD/RAC1/RHOA/ROCK1/S1PR1/SDC4/SMAD3/SMAD4/TEK/TGFB3/TGFBR1/TJP1	45
GO:0072594	BP	GO:0072594	establishment of protein localization to organelle	45/754	453/18614	2.88065e-08	1.12415e-07	3.99159e-08	AGT/AKT1/ANGPT1/BAX/BBC3/BECN1/BID/BMP4/CDH1/CDKN1A/DDIT3/FGF9/GSK3A/GZMB/HPS4/HSP90AA1/HSPA4/HSPA5/IFNG/IL10RA/IL33/JAK2/LAMP1/LEP/MAPK14/MAPK8/MAVS/MMP12/NFKBIA/NUP62/PIK3R1/PINK1/PRKCD/PTGS2/SHH/SMAD3/SQSTM1/STAT3/TERT/TGFB1/TNFAIP3/TP53/TRIM37/TSG101/ZC3H12A	45
GO:0050808	BP	GO:0050808	synapse organization	45/754	466/18614	6.66177e-08	2.47715e-07	8.79576e-08	ABL1/ACTB/ADAM10/AKT1/APOE/APP/C1QA/C3/C5AR1/CDC42/CDH1/CDH2/CTNNB1/CX3CL1/CX3CR1/DKK1/DNER/EFNB2/EPHB2/ERBB2/F2R/FCGR2B/IGF1R/IL10/IL10RA/INS/ITGAM/ITGB1/ITGB3/LGMN/MAPK14/MECP2/PTEN/PTK2B/RHOA/ROCK1/SNCA/TLR2/TNC/TNF/TREM2/WNT3A/WNT5A/WNT7A/WNT7B	45
GO:0030667	CC	GO:0030667	secretory granule membrane	45/756	319/19518	5.46005e-14	1.56635e-12	1.11356e-12	ABCA3/ADAM10/ANPEP/BSG/C5AR1/CAV1/CD14/CD38/CD44/CD47/CD63/CD68/CD9/CEACAM3/CEACAM8/CXCR1/CXCR2/CYBB/FCGR2A/FPR1/ITGAL/ITGAM/ITGAV/ITGAX/ITGB2/ITGB3/LAMP1/LAMP3/LGALS3/MFGE8/PECAM1/PLAU/PLAUR/PTPRC/RAC1/RHOA/SELL/SELP/SIRPA/SNCA/SPARC/STING1/TCIRG1/TLR2/TNFRSF1B	45
GO:0005178	MF	GO:0005178	integrin binding	45/751	151/18369	9.68554e-27	7.05284e-25	4.82887e-25	ADAM10/ADAM17/ANGPTL3/CCN2/CCN4/CD40LG/CD9/COL3A1/CX3CL1/CXCL12/FAP/FCER2/FGF1/FGF2/FN1/HMGB1/ICAM1/IGF1/IGF2/IL1B/ISG15/ITGA1/ITGAE/ITGAL/ITGAM/ITGAV/ITGAX/ITGB1/ITGB2/ITGB3/ITGB6/KDR/MFGE8/MMP14/PTK2/S1PR2/SEMA7A/SPP1/SRC/TGFBI/THBS1/THY1/VCAM1/VTN/VWF	45
GO:0004175	MF	GO:0004175	endopeptidase activity	45/751	428/18369	6.72311e-09	9.79129e-08	6.70381e-08	ACE/ACE2/ADAM10/ADAM17/BMP1/CASP1/CASP3/CASP7/CASP8/CASP9/CFLAR/CMA1/CTSB/CTSD/CTSK/CTSL/DPP4/ECE1/ELANE/F10/F2/F3/FAP/FURIN/GZMB/LGMN/MMP1/MMP10/MMP11/MMP12/MMP13/MMP14/MMP2/MMP28/MMP3/MMP7/MMP8/MMP9/PLAT/PLAU/PLG/PRTN3/REN/SHH/TMPRSS2	45
GO:0032755	BP	GO:0032755	positive regulation of interleukin-6 production	44/754	100/18614	9.20148e-35	2.99583e-33	1.06375e-33	ADORA2B/AGER/AIF1/APP/BTK/EREG/F2R/F2RL1/HMGB1/IFIH1/IFNG/IL17A/IL17F/IL17RA/IL1A/IL1B/IL33/IL6/IL6R/LEP/LGALS9/MAVS/MMP8/MYD88/NOD2/NOS2/P2RX7/PTPN11/PYCARD/RIPK2/STAT3/TICAM1/TLR2/TLR3/TLR4/TLR7/TLR8/TLR9/TNF/TRAF6/TSLP/TWIST1/WNT5A/XBP1	44
GO:0014066	BP	GO:0014066	regulation of phosphatidylinositol 3-kinase signaling	44/754	112/18614	3.52985e-32	9.88358e-31	3.50941e-31	AGT/ANGPT1/BECN1/CAT/CCL5/CD28/CSF3/EGF/EGFR/F2/F2R/F2RL1/FGF2/FGFR1/FLT1/FLT3/FN1/HGF/IGF1/IGF1R/IL18/INS/JAK2/KDR/KIT/LEP/MIR126/MIR21/OSM/PDGFA/PDGFB/PDGFRA/PDGFRB/PTEN/PTK2/SELP/SIRT1/SOX9/SRC/TEK/TGFB2/TNF/TREM2/TWIST1	44
GO:0035710	BP	GO:0035710	CD4-positive, alpha-beta T cell activation	44/754	115/18614	1.35981e-31	3.59195e-30	1.27541e-30	AGER/ANXA1/CCL19/CD274/CD28/CD80/CD86/CTSL/FOXP3/GATA3/HLA-DRA/HLA-DRB1/HMGB1/IFNG/IL12B/IL18/IL2/IL21/IL23A/IL27/IL2RA/IL4/IL4R/IL6/IL6R/IRF4/JAK3/JUNB/LEF1/LGALS9/MIR21/MTOR/MYB/NLRP3/RIPK2/RORC/SMAD7/SOCS1/STAT3/STAT6/TBX21/TCIRG1/TGFBR2/ZC3H12A	44
GO:0030879	BP	GO:0030879	mammary gland development	44/754	136/18614	5.21432e-28	1.06961e-26	3.7979e-27	AKT1/AKT2/AR/AREG/ARG1/BAX/BMP4/CAV1/CCL11/CCND1/CEBPB/CREB1/CSF1/CSF1R/EGF/ESR1/FASN/FGF10/FGF2/FGFR2/GATA3/GLI2/HIF1A/IGFBP5/IRF6/JAK2/LEF1/LRP5/MAPK1/NFKB1/NR3C1/SOX9/SRC/STAT5A/STAT6/TGFA/TGFB3/TGFBR2/TNFSF11/VEGFA/WNT3A/WNT5A/WNT7B/XBP1	44
GO:0002705	BP	GO:0002705	positive regulation of leukocyte mediated immunity	44/754	148/18614	2.78115e-26	5.27948e-25	1.87461e-25	ARG1/B2M/BTK/C3/CD1A/CD1C/CD28/CD40/F2RL1/FCER2/FCGR1A/FOXP3/GATA3/HLA-DRA/HLA-DRB1/IL12B/IL18/IL1B/IL1R1/IL2/IL21/IL23A/IL4/IL6/ITGAM/ITGB2/KIT/LAMP1/MAP3K7/MAVS/NLRP3/NOD2/NOS2/P2RX7/PTPRC/SPI1/STAT6/TBX21/TFRC/TGFB1/TICAM1/TNF/TRAF6/TREM2	44
GO:0030183	BP	GO:0030183	B cell differentiation	44/754	153/18614	1.28608e-25	2.33076e-24	8.27595e-25	ABL1/ADAM17/AICDA/BAX/BCL2/BTK/CD19/CD27/CD40LG/CD79A/EP300/FCGR2B/FLT3/HDAC9/IFNA1/IFNA2/IFNB1/IL10/IL11/IL2/IL21/IL4/IL6/IL7/IL9/IRF8/ITGB1/JAK3/KIT/LGALS1/MMP14/MS4A1/PIK3CD/PIK3R1/PTK2B/PTPRC/SPI1/TCIRG1/TLR9/TNFSF13B/TP53/VCAM1/XBP1/YY1	44
GO:0007568	BP	GO:0007568	aging	44/754	169/18614	1.13817e-23	1.83153e-22	6.50332e-23	ACE/ADM/AGT/ARG1/BECN1/C1QA/CALCA/CASP9/CAT/CCN2/CD68/CX3CL1/EDN1/EDNRA/EPO/FGF2/FOS/GNA13/GSK3A/IGF1R/IGFBP1/IGFBP2/IGFBP5/IL10/IL15/KCNMB1/KL/LOXL2/MBD2/MMP2/MPO/NFE2L2/PDGFRB/PTGS2/SMAD4/SOD1/SOD2/TFRC/TGFB3/TGFBR2/TIMP1/TNFRSF1B/TP63/VCAM1	44
GO:0043534	BP	GO:0043534	blood vessel endothelial cell migration	44/754	179/18614	1.42027e-22	2.16127e-21	7.67415e-22	ABL1/ACVRL1/ADAM17/AGTR2/AKT1/ANGPT1/ANGPT2/ANGPT4/ANXA1/APOA1/APOE/CD40/CDH5/EFNB2/FGF2/FGFR1/GREM1/HDAC9/HIF1A/HMGB1/HMOX1/HSPB1/ITGB1/KDR/KLF4/MECP2/MIR126/MIR146A/MIR200C/MIR29C/NFE2L2/NOS3/PDGFB/PPARG/PTGS2/PTK2B/RHOA/SIRT1/SRF/STAT5A/TGFB1/THBS1/TNF/VEGFA	44
GO:0010952	BP	GO:0010952	positive regulation of peptidase activity	44/754	185/18614	5.91043e-22	8.61938e-21	3.06053e-21	AGER/AIM2/BAX/BBC3/BID/CASP1/CASP8/CASP9/CCN2/CLDN4/CTSD/CTSK/CTSL/CYCS/EIF2AK3/F2R/F3/FAS/FASLG/HMGB1/JAK2/LCK/LGALS9/LGMN/MIR21/MIR29B1/MYC/NLRC4/NLRP1/NLRP3/PINK1/PPARG/PYCARD/RHOA/RIPK2/S100A8/S100A9/SIRT1/SMAD3/SNCA/STAT3/TNF/TNFSF10/WNT3A	44
GO:0002221	BP	GO:0002221	pattern recognition receptor signaling pathway	44/754	189/18614	1.47827e-21	2.09048e-20	7.42279e-21	AIM2/BTK/CASP1/CAV1/CD14/CD40/ESR1/F2RL1/FCN1/HMGB1/HSPA1A/IFIH1/IRAK3/IRF1/IRF3/IRF4/IRF7/MAP2K6/MAP3K7/MAPKAPK2/MIR146A/MYD88/NFKBIA/NLRC4/NLRP1/NLRP3/NOD2/PYCARD/RELA/RIPK2/TICAM1/TLR2/TLR3/TLR4/TLR5/TLR7/TLR8/TLR9/TNF/TNFAIP3/TRAF3/TRAF6/TREM2/XIAP	44
GO:0046777	BP	GO:0046777	protein autophosphorylation	44/754	227/18614	2.90698e-18	3.15486e-17	1.12021e-17	ABL1/ACE/ADIPOQ/AKT1/ALK/BTK/CAV1/CSF1R/EGFR/EIF2AK3/ENG/ERBB2/ERN1/FGFR1/FGFR2/FLT1/FLT3/GREM1/GSK3B/IGF1R/INS/IRAK3/JAK2/JUN/KDR/KIT/LCK/MAPK3/MAPKAPK2/MTOR/PDGFA/PDGFB/PDGFRA/PDGFRB/PINK1/PTK2/PTK2B/PTPRC/RIPK3/SRC/TEK/THY1/TXK/VEGFA	44
GO:0034764	BP	GO:0034764	positive regulation of transmembrane transport	44/754	235/18614	1.15558e-17	1.20061e-16	4.26305e-17	ABL1/ACE2/ADIPOQ/AGT/AKT1/AKT2/BAX/C3/CA2/CAV1/CCL2/CCR2/CD19/CFTR/CX3CL1/CXCL10/CXCL11/CXCL9/EDN1/EDNRA/EPHB2/F2/F2R/IFNG/IGF1/IL13/INS/ITGB1/KCNMB1/MAPK14/MIR21/MS4A1/NFE2L2/OCLN/P2RX7/PIK3R1/PINK1/PLA2G1B/PTH/PTPN11/SNCA/TERT/THY1/TREM2	44
GO:0030522	BP	GO:0030522	intracellular receptor signaling pathway	44/754	299/18614	1.04895e-13	7.85312e-13	2.78845e-13	AHR/AR/BMP2/CAV1/EP300/ESR1/F2RL1/HMGB1/HSPA1A/IFIH1/IRF3/IRF7/JAK2/LEP/MAP2K6/MAP3K7/MIR34A/MYD88/NFKBIA/NOD2/NR3C1/PARP1/PPARA/PPARG/RELA/RHOA/RIPK2/RORC/RXRA/SIRT1/SNAI2/SRC/STAT3/TLR4/TLR7/TLR8/TLR9/TNF/TNFAIP3/TP63/TRAF6/TWIST1/XIAP/YAP1	44
GO:0043010	BP	GO:0043010	camera-type eye development	44/754	338/18614	7.72588e-12	4.79124e-11	1.70125e-11	ACVRL1/AQP5/ATF4/BAX/BMP4/BMP7/BMPR2/CTNNB1/EGFR/EPHB2/FAT1/FGF10/FGF2/FLT1/GATA3/HIF1A/JUN/KDR/KLF4/LRP5/MERTK/PDGFRA/PDGFRB/PITX2/PROM1/SHH/SMAD3/SOX9/SRF/STAT3/TCIRG1/TGFB2/TGFBR1/TGFBR2/THY1/TWIST1/VEGFA/VIM/WNT5A/WNT7A/WNT7B/YY1/ZEB1/ZHX2	44
GO:1902903	BP	GO:1902903	regulation of supramolecular fiber organization	44/754	376/18614	2.65241e-10	1.37151e-09	4.8699e-10	ABL1/APC/APOA1/APOE/APP/CCL11/CCL21/CCL24/CCL26/CCN2/CCR7/CD47/CDC42/CDH5/CSF3/CX3CL1/CXCL12/EDN1/ELN/F2RL1/HSPA1A/LPAR1/MECP2/MET/MIR21/MIR29B1/MTOR/OCLN/PIK3R1/PRKCD/PTK2B/PYCARD/RAC1/RHOA/ROCK1/S1PR1/SDC4/SMAD3/SMAD4/SNCA/TGFB3/TGFBR1/TJP1/TREM2	44
GO:0031625	MF	GO:0031625	ubiquitin protein ligase binding	44/751	301/18369	1.82035e-13	4.70354e-12	3.22038e-12	AICDA/APC/ATF6/AXIN1/AXIN2/BCL2/BECN1/BID/CASP8/CD40/CDKN1A/CXCR4/EGFR/GSK3B/HIF1A/HSP90AA1/HSPA1A/HSPA5/ISG15/JAK1/JUN/LTBR/MAP1LC3A/MAP1LC3B/MDM2/NFKBIA/PINK1/PPARGC1A/PTK2B/RELA/SMAD2/SMAD3/SMAD7/SQSTM1/STING1/TNFRSF1B/TOLLIP/TP53/TRAF3/TRAF6/TRIM37/TSG101/TUBA1B/UBASH3B	44
GO:1903038	BP	GO:1903038	negative regulation of leukocyte cell-cell adhesion	43/754	150/18614	5.33111e-25	9.32944e-24	3.31265e-24	ADORA2A/AKT1/ANXA1/ARG1/BMP4/CASP3/CCL21/CD274/CD80/CD86/CEBPB/CTLA4/CXCL12/ERBB2/FCGR2B/FOXJ1/FOXP3/HLA-DRB1/HMGB1/IDO1/IFNA2/IFNB1/IL10/IL2/IL2RA/IL4/IL4R/IRF1/JAK3/KLF4/LGALS3/LGALS9/MIR146A/MIR21/PPARA/SCGB1A1/SDC4/SFTPD/SHH/SMAD7/SOCS1/TBX21/ZC3H12A	43
GO:2000377	BP	GO:2000377	regulation of reactive oxygen species metabolic process	43/754	150/18614	5.33111e-25	9.32944e-24	3.31265e-24	ACE2/AGT/AGTR1/ALOX5/ATG5/BCL2/BECN1/BMP7/CDKN1A/CFLAR/CRP/F2/F2RL1/FOXM1/HIF1A/INS/ITGAM/ITGB2/LEP/MAPK14/MIR21/MMP3/MMP8/NFE2L2/PDGFB/PDGFRB/PINK1/PPARA/PRKCD/PTK2B/RAC1/RHOA/RIPK3/SNCA/SOD1/SOD2/TGFB1/TGFBR2/THBS1/TLR4/TNF/TP53/ZC3H12A	43
GO:0048754	BP	GO:0048754	branching morphogenesis of an epithelial tube	43/754	157/18614	4.03753e-24	6.68939e-23	2.37524e-23	ABL1/AGT/AGTR2/AR/AREG/BCL2/BMP2/BMP4/BMP7/CCL11/CSF1/CTNNB1/EDN1/EDNRA/EGF/ENG/ESR1/FGF1/FGF10/FGF2/FGFR2/GLI2/GNA13/GREM1/KDR/KRAS/LEF1/LRP5/MET/MMP14/MYC/NKX2-1/SHH/SMAD4/SOX9/SRC/SRF/TGFBR2/TNF/VEGFA/WNT1/WNT5A/YAP1	43
GO:0051099	BP	GO:0051099	positive regulation of binding	43/754	176/18614	5.62972e-22	8.23145e-21	2.92278e-21	ABL1/ACE/APOE/APP/B2M/BMP2/BMP4/CAV1/CSF3/CTNNB1/EGF/EP300/GATA3/GSK3B/HMGB1/IFNG/IGF1/IRF4/JAK2/KLF4/LRP1/MBD2/MET/MMP8/MMP9/NGF/PARP1/PARP9/PDX1/PLAUR/PPARG/RIPK2/STING1/TERT/TGFB1/TICAM1/TRAF6/TRIM21/TWIST1/TXN/VTN/WNT3A/WNT5A	43
GO:0044000	BP	GO:0044000	movement in host	43/754	185/18614	4.58456e-21	6.27715e-20	2.22886e-20	ACE2/AGTR1/ANPEP/APCS/AXL/BSG/CAV1/CCR5/CD209/CD4/CD80/CD86/CTSB/CTSL/CXCL8/CXCR4/DPP4/EFNB2/EGFR/FCN1/FURIN/HLA-DRB1/HMGB1/HSPA1A/ICAM1/IFNA2/ITGAV/ITGB1/ITGB3/ITGB6/LAMP1/LGALS1/LGALS9/MRC1/NCAM1/PTX3/SIGLEC1/SMPD1/SRC/TFRC/TMPRSS2/TRIM21/TSG101	43
GO:0008217	BP	GO:0008217	regulation of blood pressure	43/754	187/18614	7.1728e-21	9.56373e-20	3.39584e-20	ACE/ACE2/ACTA2/ACVRL1/ADIPOQ/ADM/AGT/AGTR1/AGTR2/AR/BMPR2/CALCA/CD34/CMA1/COL1A2/ECE1/EDN1/EDNRA/F2R/F2RL1/GNA13/GSK3A/HMOX1/KL/LEP/LRP5/MECP2/NOS2/NOS3/NOX1/NPPB/PDGFB/PPARA/PPARG/PTGS1/PTGS2/REN/RENBP/RHOA/SMAD3/SOD1/SOD2/TNF	43
GO:0031334	BP	GO:0031334	positive regulation of protein-containing complex assembly	43/754	195/18614	4.03937e-20	5.18818e-19	1.84219e-19	ABCA3/BAX/BID/BTK/CCL11/CCL21/CCL24/CCL26/CCR7/CDH5/CSF2/CSF3/CXCL13/ESR1/GSK3B/HSP90AA1/HSPA1A/IFNG/IL5/ISG15/LGALS3/MAPK8/MAVS/MECP2/MET/MMP1/MMP3/MTOR/MYD88/OCLN/PINK1/PTK2B/PYCARD/RAC1/RHOA/SNCA/SRC/TFRC/TGFB1/TLR4/TNF/TP53/VEGFA	43
GO:1901654	BP	GO:1901654	response to ketone	43/754	208/18614	5.52078e-19	6.24573e-18	2.2177e-18	A2M/ACE/AHR/AKT1/AR/ARG1/AXIN2/BCL2L1/CASP9/CAV1/CCL19/CCL21/CCND1/CCR7/CD38/CFLAR/CFTR/CLDN4/CREB1/CYBB/EDN1/EPO/FOS/FOSL1/FOXP3/GLB1/IGF1R/JAK2/NR3C1/PARP1/PLAT/POSTN/PRKAA2/PTGER2/SIRT1/SPP1/SRC/TGFB1/TGFB2/TGFB3/THBS1/TLR2/YAP1	43
GO:0008406	BP	GO:0008406	gonad development	43/754	228/18614	2.06169e-17	2.10684e-16	7.48086e-17	A2M/ACE/AR/ATN1/BAX/BCL2/BCL2L1/CASP3/CCND1/CEBPB/EREG/ESR1/FGF9/GATA3/GATA6/HSPA5/IL1A/KDR/KIT/KITLG/LEP/MMP14/MMP2/NKX2-1/NOS3/PDGFA/PDGFRA/PDGFRB/PTX3/REN/SDC1/SIRT1/SMAD4/SOD1/SOX9/SRC/TGFB2/TGFBR1/TLR3/TLR9/TNFSF10/VEGFA/WNT5A	43
GO:0045137	BP	GO:0045137	development of primary sexual characteristics	43/754	233/18614	4.76713e-17	4.72494e-16	1.67771e-16	A2M/ACE/AR/ATN1/BAX/BCL2/BCL2L1/CASP3/CCND1/CEBPB/EREG/ESR1/FGF9/GATA3/GATA6/HSPA5/IL1A/KDR/KIT/KITLG/LEP/MMP14/MMP2/NKX2-1/NOS3/PDGFA/PDGFRA/PDGFRB/PTX3/REN/SDC1/SIRT1/SMAD4/SOD1/SOX9/SRC/TGFB2/TGFBR1/TLR3/TLR9/TNFSF10/VEGFA/WNT5A	43
GO:0051348	BP	GO:0051348	negative regulation of transferase activity	43/754	279/18614	3.88576e-14	3.02226e-13	1.07313e-13	ABL1/ADAR/ADIPOQ/ADORA2A/AGT/AKT1/APC/APOE/BMP2/BMP4/BMP7/CASP3/CAV1/CDKN1A/CDKN2A/CEBPA/DUSP1/EPHB2/FABP4/GSK3A/GSK3B/HSPB1/IFNG/IL1B/IRAK3/LRP5/MIR34A/NUP62/PPARG/PRKCD/PTEN/PTPRC/PYCARD/SIRT1/SMAD7/SMPD1/SNCA/SRC/THY1/TNFAIP3/TP53/TSG101/UBASH3B	43
GO:0034504	BP	GO:0034504	protein localization to nucleus	43/754	304/18614	8.0066e-13	5.50822e-12	1.95583e-12	AGT/AKT1/ANGPT1/BMP4/BMP7/CDH1/CDKN1A/COL1A1/EIF2AK3/F2/FGF9/GSK3B/HSP90AA1/IFNG/IL33/INS/JAK2/LEP/LIF/MAPK14/MAVS/MDM2/MMP12/NFKBIA/NUP62/PARP1/PARP9/PIK3R1/PRKCD/PTGS2/SHH/SMAD3/SOX9/SQSTM1/SRC/STAT3/TERT/TFRC/TGFB1/TP53/TXN/YAP1/ZC3H12A	43
GO:0046879	BP	GO:0046879	hormone secretion	43/754	305/18614	8.96949e-13	6.148e-12	2.183e-12	ADIPOQ/ADM/AGT/AGTR1/ALOX5/ANXA1/BTK/CCL5/CD38/CFTR/CREB1/EDN1/F2/F2RL1/FGB/GATA3/GRP/HIF1A/HLA-DRB1/IFNG/IL11/IL1B/IL1RN/IL6/INS/JAK2/LEP/LIF/LRP5/MCU/NOS2/OSM/PDX1/PPARG/PTPN11/REN/SMAD2/SMAD4/SPP1/SYT7/TCIRG1/TNF/TNFSF11	43
GO:0009914	BP	GO:0009914	hormone transport	43/754	315/18614	2.71273e-12	1.76848e-11	6.27945e-12	ADIPOQ/ADM/AGT/AGTR1/ALOX5/ANXA1/BTK/CCL5/CD38/CFTR/CREB1/EDN1/F2/F2RL1/FGB/GATA3/GRP/HIF1A/HLA-DRB1/IFNG/IL11/IL1B/IL1RN/IL6/INS/JAK2/LEP/LIF/LRP5/MCU/NOS2/OSM/PDX1/PPARG/PTPN11/REN/SMAD2/SMAD4/SPP1/SYT7/TCIRG1/TNF/TNFSF11	43
GO:0070588	BP	GO:0070588	calcium ion transmembrane transport	43/754	360/18614	2.21928e-10	1.15932e-09	4.11647e-10	ABL1/ATG5/BAX/BCL2/CAV1/CCL19/CCL21/CCL3/CCN2/CCR5/CCR7/CD19/CX3CL1/CXCL10/CXCL11/CXCL9/DDIT3/EDN1/EDNRA/EPO/F2/F2R/FASLG/FGF2/IL13/ITGAV/ITGB3/LCK/MCU/MIR200C/MIR21/MS4A1/P2RX7/PIK3CG/PLA2G1B/PTK2B/PTPRC/RRAD/SNCA/THY1/TLR9/UBASH3B/WNT3A	43
GO:0007015	BP	GO:0007015	actin filament organization	43/754	442/18614	1.06304e-07	3.8681e-07	1.37347e-07	ABL1/ACTA1/AIF1/APOA1/BCAR1/BCL2/CCL11/CCL21/CCL24/CCL26/CCN2/CCR7/CD47/CDC42/CSF3/CX3CL1/CXCL12/ELN/F2RL1/FAT1/JAK2/LPAR1/MCU/MET/MIR21/MTOR/PIK3R1/PLA2G1B/PRKCD/PTK2B/PYCARD/RAC1/RHOA/ROCK1/S1PR1/SDC4/SMAD3/SRC/SRF/TF/TGFB3/TGFBR1/TJP1	43
GO:0019838	MF	GO:0019838	growth factor binding	43/751	132/18369	2.21737e-27	1.77611e-25	1.21605e-25	A2M/ACVRL1/CCN2/COL1A1/COL1A2/COL3A1/CSF1R/CXCL13/EGFR/ENG/ERBB2/FGFR1/FGFR2/FLT1/FLT3/FURIN/IGF1R/IGFBP1/IGFBP2/IGFBP3/IGFBP5/IL10RA/IL1R1/IL1R2/IL1RN/IL2RA/IL2RB/IL6R/IL6ST/ITGAV/ITGB3/KDR/KIT/KL/LTBP1/PDGFA/PDGFB/PDGFRA/PDGFRB/TGFB3/TGFBR1/TGFBR2/THBS1	43
GO:0032722	BP	GO:0032722	positive regulation of chemokine production	42/754	70/18614	1.03144e-40	4.54807e-39	1.61491e-39	ADAM17/ADIPOQ/ADORA2B/AGER/AIF1/APP/CHIA/CSF1R/EGR1/F2RL1/HIF1A/HMGB1/HMOX1/IFNG/IL17A/IL17F/IL17RA/IL18/IL1B/IL1RL1/IL33/IL4R/IL6/IL6R/IL7/LGALS9/MAVS/MIF/MYD88/NOD2/PYCARD/RIPK2/TICAM1/TLR2/TLR3/TLR4/TLR7/TLR9/TNF/TSLP/TWIST1/WNT5A	42
GO:0002824	BP	GO:0002824	positive regulation of adaptive immune response based on somatic recombination of immune receptors built from immunoglobulin superfamily domains	42/754	123/18614	7.25232e-28	1.47148e-26	5.22488e-27	B2M/BTK/C3/CCR2/CD1A/CD1C/CD274/CD28/CD4/CD40/FCER2/FCGR1A/FOXP3/GATA3/HLA-DRA/HLA-DRB1/IL12B/IL18/IL1B/IL1R1/IL2/IL23A/IL4/IL6/JAK2/MAP3K7/MIR21/NLRP3/NOD2/P2RX7/PLA2G4A/PTPRC/RIPK2/STAT6/TBX21/TFRC/TGFB1/TNF/TNFSF13B/TRAF6/TREM2/TYK2	42
GO:0044409	BP	GO:0044409	entry into host	42/754	160/18614	8.45168e-23	1.2967e-21	4.60425e-22	ACE2/AGTR1/ANPEP/APCS/AXL/BSG/CAV1/CCR5/CD209/CD4/CD80/CD86/CTSB/CTSL/CXCL8/CXCR4/DPP4/EFNB2/EGFR/FCN1/FURIN/HLA-DRB1/HMGB1/HSPA1A/ICAM1/IFNA2/ITGAV/ITGB1/ITGB3/ITGB6/LAMP1/LGALS1/LGALS9/MRC1/NCAM1/PTX3/SIGLEC1/SMPD1/SRC/TFRC/TMPRSS2/TRIM21	42
GO:0007254	BP	GO:0007254	JNK cascade	42/754	170/18614	1.07752e-21	1.54721e-20	5.49376e-21	AGER/APP/AXIN1/CCL19/CCL21/CCN2/CCR7/CD27/EGFR/F2RL1/FCGR2B/HMGB1/IGF1R/IL1A/IL1B/LTBR/MAP2K7/MAP3K7/MAPK8/MMP8/MYD88/NFKB1/NOD2/NOX1/PINK1/PTK2B/PYCARD/RIPK2/SIRPA/SMAD3/TLR3/TLR4/TLR7/TLR9/TNF/TNFSF11/TRAF3/TRAF6/WNT5A/WNT7A/WNT7B/XIAP	42
GO:0007565	BP	GO:0007565	female pregnancy	42/754	187/18614	5.31797e-20	6.72249e-19	2.38699e-19	ACE/ACE2/ADM/AGT/AKT1/ANGPT2/AR/ARG1/BCL2/BMPR2/BSG/CALCA/CD38/CLDN4/CTSB/EPO/ESR1/FOS/FOSL1/IDO1/IGFBP2/IGFBP5/IL1B/ITGB3/JUNB/LEP/LGALS9/LIF/MIR21/MMP2/MMP9/PARP1/PTGS2/SCGB1A1/SLC2A1/SOD1/SPP1/TGFB3/TGFBR2/THBD/TIMP1/VEGFA	42
GO:0007369	BP	GO:0007369	gastrulation	42/754	196/18614	3.47573e-19	4.06348e-18	1.44284e-18	ADIPOQ/APOA1/AXIN1/BMP4/BMP7/BMPR2/CTNNB1/DKK1/DUSP1/FGFR2/FN1/GATA6/HMGA2/IL10/IL1RN/ITGAV/ITGB1/ITGB2/ITGB3/KDM6B/KLF4/LEF1/LRP5/MAP2K1/MIR145/MIR200C/MMP14/MMP2/MMP8/MMP9/SMAD1/SMAD2/SMAD3/SMAD4/SNAI1/SOX2/SRF/TGFBR2/TP53/VTN/WNT3A/WNT5A	42
GO:0043393	BP	GO:0043393	regulation of protein binding	42/754	201/18614	9.38859e-19	1.05575e-17	3.74869e-18	ABL1/ACE/ACTB/ADIPOQ/AKT1/ANGPT1/APOE/APP/B2M/BAX/BMP2/BMP4/CAV1/CDC42/CDKN1A/CFHR1/CSF3/DKK1/EP300/GSK3B/IL10/LOX/LRP1/MAPK3/MAPK8/MMP9/PDGFB/PPARA/PRKCD/RIPK2/ROCK1/SRC/STING1/TERT/TGFBR1/TICAM1/TNFSF11/TRIM21/UBASH3B/VTN/WNT3A/WNT5A	42
GO:0071695	BP	GO:0071695	anatomical structure maturation	42/754	247/18614	2.30257e-15	1.94193e-14	6.8953e-15	ACVRL1/APP/AXL/BCL2/BMP2/BTK/C1QA/C3/CCL19/CCL21/CCR6/CDH5/CEBPA/CFTR/CTNNB1/CX3CL1/CX3CR1/DDIT3/EDN1/EDNRA/EPO/EREG/GATA3/GREM1/HIF1A/IGF1/IL15/IL21/KDR/LEP/MECP2/MMP2/PPARG/PTH/PTK2B/REN/RHOA/S1PR1/TGFB2/VEGFA/WNT1/WNT5A	42
GO:0050708	BP	GO:0050708	regulation of protein secretion	42/754	275/18614	1.0638e-13	7.95362e-13	2.82413e-13	ADORA2A/ALOX5/APOE/CCL5/CD38/CFTR/F2/F2R/F2RL1/FGB/HIF1A/HLA-DRB1/IFNG/IGF1/IL12B/IL13/IL1A/IL1B/IL6/INS/JAK2/KRT20/LEP/LRP5/MCU/MIR146A/MIR29B1/NOS2/P2RX7/PDX1/PLA2G1B/PPARG/PTPN11/SYT7/TCIRG1/TGFB1/TGFB2/TGFB3/TLR2/TLR4/TNF/TREM2	42
GO:0009416	BP	GO:0009416	response to light stimulus	42/754	323/18614	2.41905e-11	1.42148e-10	5.04731e-11	AKT1/AKT2/APP/ATF4/BAX/BCL2/CASP3/CASP7/CASP9/CAT/CCND1/CDKN1A/CREBBP/EGFR/ELANE/EP300/FOS/HIF1A/IL12B/ITGB1/KIT/KRAS/MAP2K7/MAPK14/MAPK8/MECP2/MMP1/MMP2/MMP3/MMP9/MYC/NLRP1/PARP1/PIK3R1/PRKCD/PTGS2/RELA/SIRT1/SMPD1/TIMP1/TP53/YY1	42
GO:0051604	BP	GO:0051604	protein maturation	42/754	332/18614	5.87518e-11	3.28026e-10	1.16474e-10	ACE/ACE2/ADAM10/ADAM17/BMP1/CASP1/CASP3/CASP7/CASP8/CASP9/CMA1/CREBBP/CTSL/CYCS/DPP4/ECE1/EP300/F3/FGB/FURIN/IL1R2/LGMN/MAFB/MMP14/NLRC4/P2RX7/PARP1/PLA2G7/PLAT/PLAU/PLAUR/PYCARD/REN/RIPK2/SERPINE1/SERPINH1/SHH/SRC/THBD/THBS1/TMPRSS2/XIAP	42
GO:0032956	BP	GO:0032956	regulation of actin cytoskeleton organization	42/754	346/18614	2.1795e-10	1.13961e-09	4.04647e-10	ABL1/APOA1/CCL11/CCL21/CCL24/CCL26/CCN2/CCR7/CD47/CDC42/CSF1R/CSF3/CX3CL1/CXCL12/EDN1/ELN/F2RL1/IL1A/ITGB3/LPAR1/LRP1/MET/MIR21/MTOR/PDGFA/PDGFRA/PDGFRB/PIK3R1/PRKCD/PTK2B/PYCARD/RAC1/RHOA/ROCK1/S1PR1/SDC4/SMAD3/SMAD4/TEK/TGFB3/TGFBR1/TJP1	42
GO:1901681	MF	GO:1901681	sulfur compound binding	42/751	269/18369	6.6479e-14	1.90177e-12	1.30209e-12	ALK/ANGPTL3/APOE/APP/BMP4/BMP7/CCL7/CCL8/CCN2/CCN4/CD34/CXCL10/CXCL11/CXCL13/CXCL6/CXCL8/ELANE/F2/FGF1/FGF10/FGF2/FGF7/FGF9/FGFR1/FGFR2/FN1/FURIN/HBEGF/LRP1/LXN/MPO/PF4/POSTN/PTPRC/SELL/SELP/SMAD4/SOD3/TF/THBS1/VEGFA/VTN	42
GO:0014068	BP	GO:0014068	positive regulation of phosphatidylinositol 3-kinase signaling	41/754	83/18614	4.71855e-35	1.58227e-33	5.61824e-34	AGT/ANGPT1/BECN1/CAT/CCL5/CD28/CSF3/EGF/F2/F2R/F2RL1/FGF2/FGFR1/FLT1/FLT3/FN1/HGF/IGF1/IGF1R/IL18/INS/JAK2/KDR/KIT/LEP/MIR126/MIR21/OSM/PDGFA/PDGFB/PDGFRA/PDGFRB/PTK2/SELP/SIRT1/SOX9/SRC/TEK/TGFB2/TNF/TREM2	41
GO:0032677	BP	GO:0032677	regulation of interleukin-8 production	41/754	103/18614	2.46023e-30	6.04267e-29	2.1456e-29	ADIPOQ/ANXA1/CD14/CD2/CHI3L1/CRP/DDIT3/ELANE/F2R/F2RL1/F3/FCN1/HMGB1/HSPA1A/IL10/IL17F/IL1B/IL6/KLF4/LEP/LGALS9/MAVS/MIR146A/MYD88/NOD2/NOS2/PLA2G1B/PTPRC/PYCARD/RELA/SERPINE1/STAT3/TLR2/TLR3/TLR4/TLR5/TLR7/TLR8/TLR9/TNF/WNT5A	41
GO:0032637	BP	GO:0032637	interleukin-8 production	41/754	104/18614	3.90886e-30	9.35454e-29	3.32156e-29	ADIPOQ/ANXA1/CD14/CD2/CHI3L1/CRP/DDIT3/ELANE/F2R/F2RL1/F3/FCN1/HMGB1/HSPA1A/IL10/IL17F/IL1B/IL6/KLF4/LEP/LGALS9/MAVS/MIR146A/MYD88/NOD2/NOS2/PLA2G1B/PTPRC/PYCARD/RELA/SERPINE1/STAT3/TLR2/TLR3/TLR4/TLR5/TLR7/TLR8/TLR9/TNF/WNT5A	41
GO:0042116	BP	GO:0042116	macrophage activation	41/754	109/18614	3.61792e-29	8.20256e-28	2.91253e-28	AGER/AIF1/APP/C1QA/C5AR1/CCL3/CEBPA/CSF2/CX3CL1/CX3CR1/FCGR2B/FCGR3A/IFNG/IL10/IL13/IL1RL1/IL33/IL4/IL4R/IL6/ITGAM/ITGB2/JAK2/JUN/MIF/MIR145/MMP8/PLA2G4A/PTPRC/SNCA/SPHK1/THBS1/TICAM1/TLR2/TLR3/TLR4/TLR9/TNF/TREM2/WNT5A/ZC3H12A	41
GO:0032611	BP	GO:0032611	interleukin-1 beta production	41/754	112/18614	1.28624e-28	2.8027e-27	9.95168e-28	AGER/AIM2/APOA1/APP/CASP1/CASP8/CCL19/CCL3/CCR7/CX3CL1/CX3CR1/EGR1/F2R/F2RL1/GSDMD/HSPB1/IFNG/IGF1/IL17A/IL6/JAK2/LGALS9/MYD88/NLRC4/NLRP1/NLRP3/NOD2/P2RX7/PYCARD/RIPK2/SIRPA/SMAD3/SPHK1/STAT3/TLR4/TLR8/TNF/TNFAIP3/TREM2/WNT5A/ZC3H12A	41
GO:0032651	BP	GO:0032651	regulation of interleukin-1 beta production	41/754	112/18614	1.28624e-28	2.8027e-27	9.95168e-28	AGER/AIM2/APOA1/APP/CASP1/CASP8/CCL19/CCL3/CCR7/CX3CL1/CX3CR1/EGR1/F2R/F2RL1/GSDMD/HSPB1/IFNG/IGF1/IL17A/IL6/JAK2/LGALS9/MYD88/NLRC4/NLRP1/NLRP3/NOD2/P2RX7/PYCARD/RIPK2/SIRPA/SMAD3/SPHK1/STAT3/TLR4/TLR8/TNF/TNFAIP3/TREM2/WNT5A/ZC3H12A	41
GO:0046634	BP	GO:0046634	regulation of alpha-beta T cell activation	41/754	114/18614	2.92014e-28	6.14765e-27	2.18288e-27	ADORA2A/AGER/ANXA1/CCL19/CCR2/CD274/CD28/CD80/CD86/FOXP3/GATA3/HLA-DRA/HLA-DRB1/HMGB1/IFNG/IL12B/IL18/IL2/IL23A/IL27/IL2RA/IL4/IL4R/IRF1/IRF4/JAK2/JAK3/JUNB/LGALS9/MIR21/NLRP3/PTPRC/RHOA/RIPK2/SHH/SMAD7/SOCS1/TBX21/TGFBR2/TYK2/ZC3H12A	41
GO:0032874	BP	GO:0032874	positive regulation of stress-activated MAPK cascade	41/754	129/18614	7.75038e-26	1.43241e-24	5.08614e-25	AGER/APP/AXIN1/BMP2/BMP4/CCL19/CCL21/CCN2/CCR7/CD27/F2RL1/FCGR2B/HMGB1/IL1A/IL1B/LEP/LTBR/MAP2K7/MMP8/MYD88/NOD2/NOX1/PTK2B/PYCARD/RIPK2/SPHK1/SPI1/TGFB2/TLR3/TLR4/TLR9/TNF/TNFSF11/TRAF3/TRAF6/VEGFA/WNT5A/WNT7A/WNT7B/XIAP/ZC3H12A	41
GO:0042542	BP	GO:0042542	response to hydrogen peroxide	41/754	129/18614	7.75038e-26	1.43241e-24	5.08614e-25	ABL1/ANXA1/AREG/ARG1/AXL/BCL2/BECN1/CASP3/CAT/COL1A1/EDN1/ERN1/FOSL1/HGF/HMOX1/IL10/IL6/KDM6B/MAP1LC3A/MET/MIR21/MIR34A/MMP2/NFE2L2/PDGFRB/PINK1/PRKCD/PTK2B/RELA/RIPK3/SDC1/SIRPA/SIRT1/SOD1/SOD2/SPHK1/SRC/STAT1/STAT6/TNFAIP3/TXN	41
GO:0070304	BP	GO:0070304	positive regulation of stress-activated protein kinase signaling cascade	41/754	131/18614	1.52631e-25	2.75721e-24	9.79017e-25	AGER/APP/AXIN1/BMP2/BMP4/CCL19/CCL21/CCN2/CCR7/CD27/F2RL1/FCGR2B/HMGB1/IL1A/IL1B/LEP/LTBR/MAP2K7/MMP8/MYD88/NOD2/NOX1/PTK2B/PYCARD/RIPK2/SPHK1/SPI1/TGFB2/TLR3/TLR4/TLR9/TNF/TNFSF11/TRAF3/TRAF6/VEGFA/WNT5A/WNT7A/WNT7B/XIAP/ZC3H12A	41
GO:0051250	BP	GO:0051250	negative regulation of lymphocyte activation	41/754	168/18614	5.43824e-21	7.39179e-20	2.62464e-20	ADORA2A/ANXA1/ARG1/AXL/BMP4/BTK/CASP3/CD274/CD80/CD86/CEBPB/CTLA4/ERBB2/FCGR2B/FOXJ1/FOXP3/HLA-DRB1/HMGB1/IDO1/IFNA2/IFNB1/IL10/IL2/IL2RA/IL4/IL4R/IRF1/JAK3/LGALS3/LGALS9/MERTK/MIR21/SCGB1A1/SDC4/SFTPD/SHH/SMAD7/SOCS1/TBX21/TNFAIP3/ZC3H12A	41
GO:0030100	BP	GO:0030100	regulation of endocytosis	41/754	214/18614	6.49258e-17	6.33422e-16	2.24913e-16	ABL1/ACTB/ADIPOQ/ANGPT1/APOE/AXL/B2M/C3/CAV1/CCL19/CCL21/CD14/CD63/CDC42/DKK1/EFNB2/EGF/F2RL1/GREM1/IL4/ITGAV/ITGB3/LGALS3/LPAR1/LRP1/RAC1/ROCK1/SELE/SERPINE1/SMPD1/SNCA/SPHK1/SRC/SYT7/TF/TREM2/TSG101/VEGFA/VTN/WNT3A/WNT5A	41
GO:0031669	BP	GO:0031669	cellular response to nutrient levels	41/754	230/18614	9.15665e-16	8.07515e-15	2.86729e-15	ALB/ATF3/ATF4/ATG5/BCL2/BECN1/BMPR2/CD68/CDKN1A/COL1A1/CTSK/EIF2AK3/FAS/FOLR2/FOS/FOXO3/HMOX1/HSPA5/IGF1R/IL15/KRT20/LEP/MAP1LC3A/MAP1LC3B/MAPK1/MAPK3/MAPK8/MTOR/NFE2L2/POSTN/PPARA/PRKAA2/RXRA/SIRT1/SLC2A1/SNAI2/SRF/TFEB/TP53/XBP1/ZC3H12A	41
GO:0071241	BP	GO:0071241	cellular response to inorganic substance	41/754	231/18614	1.07133e-15	9.40354e-15	3.33896e-15	ABCB6/AKT1/APP/ATF4/B2M/BECN1/CDH1/CEBPA/CFLAR/CHUK/CREB1/CYBB/EDN1/EGFR/EIF2AK3/FABP4/FOS/GSK3A/HMOX1/HSPA5/JUN/JUNB/LGMN/MAP1LC3A/MAPK1/MAPK3/MAPK8/MMP3/MMP9/NFE2L2/PARP1/PRKAA2/PTGS2/SHH/SMPD1/SNCA/SOD1/SYT7/TF/TLR9/WNT5A	41
GO:0060348	BP	GO:0060348	bone development	41/754	235/18614	1.98917e-15	1.68778e-14	5.99288e-15	AXIN2/BGN/BMP2/BMP4/BMPR2/CCN4/COL1A1/COL3A1/ENG/EP300/FGFR2/FLI1/GREM1/HAS2/IGF1/ITGB6/KDR/KIT/LEP/LOX/LRP5/MAP2K6/MAPK14/MMP13/MMP14/PITX2/PTH/PTPN11/PTPRC/RHOA/SERPINH1/SMAD1/SOX9/SRC/SRF/TGFB3/TGFBR2/TNFSF11/TP53/TWIST1/WNT1	41
GO:0060828	BP	GO:0060828	regulation of canonical Wnt signaling pathway	41/754	260/18614	7.01124e-14	5.32018e-13	1.88906e-13	APC/APOE/AXIN1/AXIN2/BMP2/CAV1/CDH2/COL1A1/CTNNB1/DDIT3/DKK1/EGF/EGFR/EGR1/FGF10/FGF2/FGF9/FGFR2/GLI1/GREM1/GSK3A/GSK3B/IGFBP1/IGFBP2/LGR5/MAPK14/MIR145/MIR29B1/MIR29C/NFKB1/SHH/SMAD3/SNAI2/SOX2/SOX9/SRC/TGFB1/WNT3A/WNT5A/XIAP/YAP1	41
GO:0007264	BP	GO:0007264	small GTPase mediated signal transduction	41/754	483/18614	6.87741e-06	1.95599e-05	6.94525e-06	ABL1/AGTR1/AIF1/APOA1/APOE/CDC42/CDKN1A/CDKN2A/COL1A2/COL3A1/CSF1/EPHB2/EPO/F2R/F2RL1/FGF10/FGF2/FOXM1/GNA13/HMOX1/IGF1/ITGAV/ITGB1/KITLG/KRAS/LPAR1/MET/NGF/NUP62/PDGFRB/PDPN/PIK3CG/PTH/RAC1/RHOA/ROCK1/RRAD/SQSTM1/SRC/TGFB2/TP53	41
GO:0031252	CC	GO:0031252	cell leading edge	41/756	422/19518	6.69931e-08	8.78566e-07	6.24597e-07	ABL1/ACTA1/ACTA2/ACTB/ADAM17/ADORA2A/AIF1/AKT1/AKT2/ANGPTL3/APC/APP/ATF4/BCAR1/CD44/CDC42/CDH1/CDH2/CTNNB1/CXCR4/DPP4/EGFR/ERBB2/FAP/FAT1/ITGAV/ITGB1/ITGB3/KITLG/OCLN/PDE4A/PDPN/PTK2B/RAC1/RHOA/ROCK1/S100B/SRC/THY1/TLR4/VIM	41
GO:0002020	MF	GO:0002020	protease binding	41/751	138/18369	2.07133e-24	1.38261e-22	9.46635e-23	A2M/BCL2/CASP1/CASP3/CD28/CFLAR/COL1A1/COL1A2/COL3A1/CST3/DPP4/ELANE/F2RL1/F3/FAP/FN1/FURIN/GSK3B/IL1R1/INS/ITGAV/ITGB1/ITGB3/KIT/MIF/NLRC4/PINK1/PTEN/PYCARD/RIPK2/SELL/SERPINA1/SERPINE1/TIMP1/TIMP2/TIMP3/TIMP4/TNF/TNFAIP3/TP53/VWF	41
GO:0140375	MF	GO:0140375	immune receptor activity	41/751	141/18369	5.21651e-24	3.21417e-22	2.20065e-22	C5AR1/CCR1/CCR2/CCR3/CCR4/CCR5/CCR6/CCR7/CCR8/CD4/CD44/CSF2RB/CX3CR1/CXCR1/CXCR2/CXCR3/CXCR4/CXCR5/FCGR1A/FCGR2B/FCGR3A/FLT3/FPR1/HLA-DRA/HLA-DRB1/IFNAR1/IL10RA/IL12B/IL13RA1/IL13RA2/IL17RA/IL1R1/IL1R2/IL1RL1/IL2RA/IL2RB/IL3RA/IL4R/IL6R/IL6ST/IL7R	41
GO:0002548	BP	GO:0002548	monocyte chemotaxis	40/754	71/18614	2.8203e-37	1.08176e-35	3.84106e-36	AIF1/ANXA1/CALCA/CCL1/CCL11/CCL13/CCL17/CCL18/CCL19/CCL2/CCL20/CCL21/CCL22/CCL24/CCL26/CCL3/CCL4/CCL5/CCL7/CCL8/CCR1/CCR2/CX3CL1/CX3CR1/CXCL10/CXCL12/CXCL17/DUSP1/FLT1/GREM1/HMGB1/IL6/IL6R/LGALS3/LGMN/PDGFB/PLA2G7/S100A12/SERPINE1/TNFSF11	40
GO:2000628	BP	GO:2000628	regulation of miRNA metabolic process	40/754	81/18614	3.22299e-34	1.0255e-32	3.64129e-33	AR/BMP2/BMP4/DROSHA/EGFR/EGR1/ESR1/FGF2/FOS/FOSL1/FOXO3/GATA3/GATA6/HIF1A/IL10/JUN/KLF4/MRTFA/MYB/MYC/NFKB1/NR3C1/PDGFB/PPARA/PPARG/RELA/SMAD1/SMAD3/SMAD4/SOX9/SPI1/SRF/STAT3/TERT/TGFB1/TGFB2/TNF/TP53/YY1/ZC3H12A	40
GO:0010586	BP	GO:0010586	miRNA metabolic process	40/754	97/18614	2.39272e-30	5.90275e-29	2.09592e-29	AR/BMP2/BMP4/DROSHA/EGFR/EGR1/ESR1/FGF2/FOS/FOSL1/FOXO3/GATA3/GATA6/HIF1A/IL10/JUN/KLF4/MRTFA/MYB/MYC/NFKB1/NR3C1/PDGFB/PPARA/PPARG/RELA/SMAD1/SMAD3/SMAD4/SOX9/SPI1/SRF/STAT3/TERT/TGFB1/TGFB2/TNF/TP53/YY1/ZC3H12A	40
GO:0032963	BP	GO:0032963	collagen metabolic process	40/754	108/18614	3.53349e-28	7.33002e-27	2.60271e-27	ARG1/BMP4/CCN2/COL1A1/COL1A2/CST3/CTSB/CTSK/CTSL/ENG/F2/F2R/FAP/FURIN/HIF1A/IL6/ITGB1/MIR145/MIR21/MIR29A/MIR29B1/MMP1/MMP10/MMP11/MMP12/MMP13/MMP14/MMP2/MMP28/MMP3/MMP7/MMP8/MMP9/P2RX7/PDGFRB/PRTN3/SERPINH1/TGFB1/TGFB3/VIM	40
GO:0001938	BP	GO:0001938	positive regulation of endothelial cell proliferation	40/754	115/18614	5.96558e-27	1.18047e-25	4.19155e-26	ACVRL1/ADAM17/AGTR1/AKT1/ARG1/BMP2/BMP4/BMPR2/CCL11/CCL24/CCL26/CCR3/CXCL12/EGF/F3/FGF10/FGF2/FGF7/FGFR1/HIF1A/HMGB1/HMOX1/IGF2/IL10/ITGB3/JUN/KDR/MIR126/MIR146A/MIR21/MIR29A/PDGFB/PIK3CD/SIRT1/STAT3/STAT5A/TEK/TGFBR1/VEGFA/WNT5A	40
GO:0002698	BP	GO:0002698	negative regulation of immune effector process	40/754	122/18614	8.03855e-26	1.48079e-24	5.2579e-25	A2M/AHR/ANGPT1/ANXA1/APOA1/ARG1/AXL/CCR2/CD47/CX3CR1/ENPP3/FCGR2B/FOXJ1/FOXP3/HMOX1/IFNA2/IFNB1/IL10/IL13RA2/IL2/IL33/IL4/IL4R/IL7R/INS/IRAK3/JAK3/LGALS3/LGALS9/NOD2/PTPRC/SMAD7/SPI1/TBX21/TGFB1/TGFB2/TGFB3/TNF/TWIST1/ZC3H12A	40
GO:0050864	BP	GO:0050864	regulation of B cell activation	40/754	130/18614	1.23965e-24	2.12295e-23	7.53808e-24	AHR/BCL2/BTK/CASP3/CD19/CD27/CD28/CD38/CD40/CDKN1A/CTLA4/EPHB2/FCGR2B/FOXJ1/FOXP3/IL10/IL13/IL2/IL21/IL4/IL5/IL6/IL7/MIF/MMP14/MZB1/NOD2/PTPRC/SPI1/STAT6/TBX21/TFRC/TGFB1/TICAM1/TLR4/TLR9/TNFAIP3/TNFSF13B/WNT3A/XBP1	40
GO:0046718	BP	GO:0046718	viral entry into host cell	40/754	153/18614	1.06056e-21	1.52677e-20	5.42119e-21	ACE2/AGTR1/ANPEP/APCS/AXL/BSG/CAV1/CCR5/CD209/CD4/CD80/CD86/CTSB/CTSL/CXCR4/DPP4/EFNB2/EGFR/FCN1/FURIN/HLA-DRB1/HMGB1/HSPA1A/ICAM1/IFNA2/ITGAV/ITGB1/ITGB3/ITGB6/LAMP1/LGALS1/LGALS9/MRC1/NCAM1/PTX3/SIGLEC1/SMPD1/TFRC/TMPRSS2/TRIM21	40
GO:0010950	BP	GO:0010950	positive regulation of endopeptidase activity	40/754	171/18614	8.66346e-20	1.05929e-18	3.76127e-19	AGER/AIM2/BAX/BBC3/BID/CASP1/CASP8/CASP9/CCN2/CTSD/CYCS/EIF2AK3/F2R/F3/FAS/FASLG/HMGB1/JAK2/LCK/LGALS9/LGMN/MIR21/MIR29B1/MYC/NLRC4/NLRP1/NLRP3/PPARG/PYCARD/RHOA/RIPK2/S100A8/S100A9/SIRT1/SMAD3/SNCA/STAT3/TNF/TNFSF10/WNT3A	40
GO:0071453	BP	GO:0071453	cellular response to oxygen levels	40/754	172/18614	1.08639e-19	1.32257e-18	4.6961e-19	AKT1/ANGPT4/ATF4/BCL2/BMP7/CAV1/CD34/CFLAR/CYBB/EDN1/EGR1/FAS/FOS/GATA6/HIF1A/HMOX1/KCNMB1/LPAR1/MALAT1/MDM2/MIR126/MIR145/MIR146A/MIR21/MIR34A/MTOR/MYC/NFE2L2/NOX1/PINK1/PPARG/PTGS2/SIRT1/SRC/TERC/TERT/TP53/TREM2/TWIST1/VEGFA	40
GO:0031099	BP	GO:0031099	regeneration	40/754	190/18614	4.83388e-18	5.17586e-17	1.83782e-17	ACE/ADM/ANGPT2/ANXA1/AXL/BCL2/CCND1/CD9/CDKN1A/CEBPB/CFLAR/CXCL12/FGF10/FLT3/GLI1/HGF/HMOX1/IGF1/IGF1R/IGFBP1/IL10/IL6/JAK2/JUN/KLF4/MAP2K1/MIR29B1/MMP2/PDX1/SOX2/SPP1/TGFBR2/THY1/TNC/TNF/TXK/VTN/WNT1/WNT7A/YAP1	40
GO:0045216	BP	GO:0045216	cell-cell junction organization	40/754	214/18614	3.81346e-16	3.48375e-15	1.23699e-15	ACE/ACE2/ACTB/ADAM10/AGT/APC/CAV1/CD9/CDC42/CDH1/CDH11/CDH2/CDH5/CLDN4/CSF1R/CTNNB1/EFNB2/EPHB2/F2R/F2RL1/IL17A/IL1B/OCLN/PECAM1/PRTN3/RHOA/ROCK1/SMAD3/SMAD7/SNAI1/SNAI2/SRC/SRF/TGFB1/TGFB2/TGFB3/TGFBR1/TJP1/TNF/VEGFA	40
GO:0043087	BP	GO:0043087	regulation of GTPase activity	40/754	364/18614	1.06916e-08	4.44822e-08	1.57945e-08	AKT2/CCL1/CCL11/CCL13/CCL17/CCL18/CCL19/CCL2/CCL20/CCL21/CCL22/CCL24/CCL26/CCL3/CCL4/CCL5/CCL7/CCL8/CCR7/CD40/CX3CL1/CXCL13/ERBB2/F2R/F2RL1/FOXJ1/GSK3B/ITGB1/MET/MIR21/MTOR/PLXNA2/PRTN3/PTK2/PTK2B/PYCARD/S1PR1/SOD1/THY1/WNT5A	40
GO:0005769	CC	GO:0005769	early endosome	40/756	423/19518	1.99457e-07	2.36944e-06	1.6845e-06	ABCB6/AKT2/ANGPTL3/ANXA1/APOA1/APOE/APP/B2M/CAV1/CD207/CD274/CD4/CFTR/CXCR4/DKK1/DNER/EGFR/ERBB2/F2R/F2RL1/FCGR1A/HLA-DRA/KDR/LAMP3/LRP1/MAP2K1/MAPK1/MAPK3/MARCHF8/NOX1/SIGLEC1/SPHK1/TF/TFRC/TLR3/TLR4/TOLLIP/TSG101/VCAM1/WNT3A	40
GO:0071677	BP	GO:0071677	positive regulation of mononuclear cell migration	39/754	72/18614	1.84937e-35	6.31492e-34	2.24227e-34	ABL1/ADAM10/ADAM17/AGER/AIF1/APP/CCL1/CCL20/CCL21/CCL3/CCL4/CCL5/CCL7/CCR1/CCR2/CCR6/CCR7/CD47/CSF1/CX3CR1/CXCL10/CXCL12/CXCL13/CXCL17/HMGB1/IL4/ITGB3/LGALS3/LGALS9/LGMN/PLA2G7/PTK2B/PYCARD/RHOA/SERPINE1/SPI1/TNF/TNFSF14/WNT5A	39
GO:0042100	BP	GO:0042100	B cell proliferation	39/754	103/18614	6.24282e-28	1.27126e-26	4.51395e-27	ABL1/AHR/BAX/BCL2/BTK/CASP3/CD19/CD38/CD40/CD40LG/CD79A/CDKN1A/CTLA4/EPHB2/FCGR2B/IFNA1/IFNA2/IFNB1/IL10/IL13/IL2/IL21/IL4/IL5/IL7/IL7R/IL9/LEF1/MIF/MS4A1/MZB1/PRKCD/PTPRC/TFRC/TICAM1/TLR4/TLR9/TNFSF13B/WNT3A	39
GO:0045621	BP	GO:0045621	positive regulation of lymphocyte differentiation	39/754	130/18614	1.35919e-23	2.18094e-22	7.74397e-23	ACTB/ANXA1/AXL/BTK/CCL19/CD27/CD80/CD86/FOXO3/FOXP3/GATA3/GLI2/HLA-DRA/HLA-DRB1/IFNG/IL10/IL12B/IL15/IL18/IL2/IL23A/IL2RA/IL4/IL4R/IL7/IL7R/LEF1/LGALS9/MIR21/MMP14/NLRP3/PTPRC/RHOA/RIPK2/SHH/SOCS1/SPI1/TGFBR2/XBP1	39
GO:0051384	BP	GO:0051384	response to glucocorticoid	39/754	142/18614	4.8816e-22	7.15627e-21	2.54101e-21	A2M/ABCA3/ACE/ADIPOQ/ADM/AIF1/ANXA1/AREG/ARG1/AXIN2/BCL2/CASP3/CASP9/CCND1/CFLAR/EDN1/EPO/FLT3/FOS/FOSL1/GLB1/GSK3A/IGF1R/IGFBP2/IL10/IL1RN/IL22/IL6/JAK2/NR3C1/PDX1/PLAT/PTGDS/PTGS2/RHOA/SCGB1A1/SDC1/TNF/WNT7B	39
GO:0016064	BP	GO:0016064	immunoglobulin mediated immune response	39/754	145/18614	1.12235e-21	1.60335e-20	5.69311e-21	AICDA/B2M/BTK/C1QA/C3/CCR6/CD19/CD27/CD28/CD40/CD40LG/CSF2RB/FCER2/FCGR1A/FCGR2B/FCGR3A/FOXJ1/FOXP3/HLA-DRA/HLA-DRB1/IL10/IL13RA2/IL2/IL2RB/IL4/IL9/IRF7/MYD88/NOD2/PRKCD/PTPRC/STAT6/TBX21/TCIRG1/TFRC/TGFB1/TLR8/TNF/TREM2	39
GO:0019724	BP	GO:0019724	B cell mediated immunity	39/754	148/18614	2.5226e-21	3.51407e-20	1.24776e-20	AICDA/B2M/BTK/C1QA/C3/CCR6/CD19/CD27/CD28/CD40/CD40LG/CSF2RB/FCER2/FCGR1A/FCGR2B/FCGR3A/FOXJ1/FOXP3/HLA-DRA/HLA-DRB1/IL10/IL13RA2/IL2/IL2RB/IL4/IL9/IRF7/MYD88/NOD2/PRKCD/PTPRC/STAT6/TBX21/TCIRG1/TFRC/TGFB1/TLR8/TNF/TREM2	39
GO:0031214	BP	GO:0031214	biomineral tissue development	39/754	173/18614	1.01162e-18	1.1285e-17	4.00701e-18	ALOX5/ATF4/AXIN2/BMP2/BMP4/BMP7/BMPR2/CCL3/CCR1/CEBPB/CFTR/COL1A1/COL1A2/EIF2AK3/FGFR2/GREM1/HIF1A/IGF1/ISG15/ITGB6/KL/LEP/LOX/MMP13/NOS3/P2RX7/PPARA/PTGS2/PTH/PTK2B/ROCK1/RXRA/S1PR1/SMAD3/SOX9/SPP1/TCIRG1/TGFB1/TWIST1	39
GO:0002040	BP	GO:0002040	sprouting angiogenesis	39/754	188/18614	2.17252e-17	2.21605e-16	7.86866e-17	ABL1/ACVRL1/AGTR1/AKT1/ALOX5/ANGPT1/ANXA1/BMP4/EFNB2/FGF1/FGF2/FUT1/GREM1/HDAC9/HMOX1/IL10/IL12B/ITGB1/JAK1/KDR/KLF4/LEF1/LOXL2/MIR126/MIR146A/MIR200C/MIR21/MIR29C/MIR34A/PTGS2/PTK2B/RHOA/S100A1/SMAD1/SRF/TEK/THBS1/TJP1/VEGFA	39
GO:0071248	BP	GO:0071248	cellular response to metal ion	39/754	200/18614	2.01184e-16	1.884e-15	6.68961e-16	ABCB6/AKT1/APP/ATF4/B2M/BECN1/CDH1/CEBPA/CHUK/CREB1/CYBB/EDN1/EGFR/EIF2AK3/FABP4/FOS/GSK3A/HMOX1/HSPA5/JUN/JUNB/LGMN/MAP1LC3A/MAPK1/MAPK3/MAPK8/MMP9/NFE2L2/PARP1/PRKAA2/PTGS2/SHH/SMPD1/SNCA/SOD1/SYT7/TF/TLR9/WNT5A	39
GO:0016485	BP	GO:0016485	protein processing	39/754	250/18614	4.10655e-13	2.89267e-12	1.02711e-12	ACE/ACE2/ADAM10/ADAM17/BMP1/CASP1/CASP3/CASP7/CASP8/CASP9/CMA1/CTSL/CYCS/DPP4/ECE1/F3/FGB/FURIN/IL1R2/LGMN/MAFB/MMP14/NLRC4/P2RX7/PARP1/PLA2G7/PLAT/PLAU/PLAUR/PYCARD/REN/RIPK2/SERPINE1/SHH/SRC/THBD/THBS1/TMPRSS2/XIAP	39
GO:1903522	BP	GO:1903522	regulation of blood circulation	39/754	261/18614	1.658e-12	1.10533e-11	3.92476e-12	ABL1/ACE/ACE2/ADM/AGER/AGT/AGTR1/AGTR2/BMPR2/CALCA/CAV1/CCN2/CD38/DES/ECE1/EDN1/EDNRA/F2R/FGB/GSK3A/HBEGF/HSP90AA1/IL2/JAK2/KCNMB2/LEP/MDM2/MIR200C/MIR21/MMP2/NOS3/PIK3CG/PTGS2/RHOA/S100A1/SMAD7/TGFB2/TNF/ZC3H12A	39
GO:1904062	BP	GO:1904062	regulation of monoatomic cation transmembrane transport	39/754	346/18614	8.06942e-09	3.4079e-08	1.21006e-08	ABL1/ATG5/BAX/BCL2/CAV1/CD19/CD63/CX3CL1/CXCL10/CXCL11/CXCL9/EDN1/EDNRA/EPO/F2/F2R/GRP/IFNG/IL13/ITGB1/ITGB3/KCNMB1/MIR200C/MIR21/MIR29B1/MMP9/MS4A1/P2RX7/PIK3CG/PLA2G1B/PTK2B/RRAD/SNCA/TCIRG1/THY1/TLR9/TREM2/TWIST1/UBASH3B	39
GO:0043025	CC	GO:0043025	neuronal cell body	39/756	500/19518	2.89293e-05	0.00021417	0.00015226	ABL1/ACVRL1/ADORA2A/AIF1/APOE/APP/ARG1/CALCA/CASP3/CCR2/CCR4/CDC42/CX3CL1/CX3CR1/CYBB/DNER/EPHB2/FZD3/GSK3A/HSP90AA1/IGF1R/IL6ST/ITGA1/LPAR1/P2RX7/PRKAA2/PTK2B/PYCARD/S100B/SNCA/SOD1/SRC/TAC1/TBX21/TGFB2/TGFB3/THY1/TNF/TNFRSF1B	39
GO:0043367	BP	GO:0043367	CD4-positive, alpha-beta T cell differentiation	38/754	89/18614	1.41556e-29	3.28926e-28	1.16793e-28	ANXA1/CCL19/CD80/CD86/CTSL/FOXP3/GATA3/HLA-DRA/HLA-DRB1/HMGB1/IFNG/IL12B/IL18/IL2/IL21/IL23A/IL27/IL4/IL4R/IL6/IL6R/IRF4/JAK3/JUNB/LEF1/LGALS9/MIR21/MTOR/MYB/NLRP3/RIPK2/RORC/SMAD7/SOCS1/STAT3/STAT6/TBX21/ZC3H12A	38
GO:0030168	BP	GO:0030168	platelet activation	38/754	133/18614	3.54283e-22	5.27656e-21	1.87358e-21	ACTB/APOE/AXL/CD40/CD40LG/CD9/COL3A1/F2/F2R/FGB/GNA13/HSPB1/IL6/IL6ST/ITGB3/JAK2/LCK/MAPK14/MERTK/MMRN1/NOS3/PDGFA/PDGFB/PDGFRA/PDPN/PF4/PIK3CG/PLA2G4A/PRKCD/SELP/SRC/SRF/THBD/TLR4/TXK/UBASH3B/VWF/WNT3A	38
GO:0035270	BP	GO:0035270	endocrine system development	38/754	137/18614	1.13367e-21	1.61541e-20	5.73594e-21	AKT1/ANXA1/APOA1/BMP2/BMP4/CDH1/CDH2/CREB1/EDN1/EDNRA/EIF2AK3/FGF10/FGF2/GATA3/GATA6/GLI1/GLI2/GSK3A/GSK3B/IL6/IL6R/MAP2K1/MAPK1/MAPK3/NKX2-1/NR3C1/PDGFRA/PDX1/PITX2/SHH/SMAD2/SMAD3/SMAD4/SOX2/SOX9/SRF/TGFBR1/WNT5A	38
GO:0035296	BP	GO:0035296	regulation of tube diameter	38/754	142/18614	4.5593e-21	6.25786e-20	2.22201e-20	ABL1/ACE/ACE2/ADM/ADORA2A/ADORA2B/AGT/AGTR1/AGTR2/APOE/ATG5/BMPR2/CALCA/CAV1/CD38/CRP/ECE1/EDN1/EDNRA/F2R/F2RL1/FGB/INS/ITGA1/KCNMB1/KCNMB2/LEP/MIR21/MMP2/NOS3/NPPB/PTGS2/RHOA/ROCK1/SOD1/SOD2/SOD3/TNF	38
GO:0097746	BP	GO:0097746	blood vessel diameter maintenance	38/754	142/18614	4.5593e-21	6.25786e-20	2.22201e-20	ABL1/ACE/ACE2/ADM/ADORA2A/ADORA2B/AGT/AGTR1/AGTR2/APOE/ATG5/BMPR2/CALCA/CAV1/CD38/CRP/ECE1/EDN1/EDNRA/F2R/F2RL1/FGB/INS/ITGA1/KCNMB1/KCNMB2/LEP/MIR21/MMP2/NOS3/NPPB/PTGS2/RHOA/ROCK1/SOD1/SOD2/SOD3/TNF	38
GO:0033135	BP	GO:0033135	regulation of peptidyl-serine phosphorylation	38/754	143/18614	5.97555e-21	8.02472e-20	2.84938e-20	AKT1/ANGPT1/APP/AXIN1/BAX/BCL2/CAV1/CD44/CSF3/DKK1/EGFR/GSK3A/HGF/HSP90AA1/IFNA1/IFNA2/IFNB1/IFNG/IL11/IL6/LIF/MIF/NGF/OSM/PINK1/PTEN/PTGS2/RIPK2/SMAD7/SNCA/TBK1/TFRC/TGFB1/TNF/TXN/VEGFA/WNT3A/WNT5A	38
GO:0035150	BP	GO:0035150	regulation of tube size	38/754	143/18614	5.97555e-21	8.02472e-20	2.84938e-20	ABL1/ACE/ACE2/ADM/ADORA2A/ADORA2B/AGT/AGTR1/AGTR2/APOE/ATG5/BMPR2/CALCA/CAV1/CD38/CRP/ECE1/EDN1/EDNRA/F2R/F2RL1/FGB/INS/ITGA1/KCNMB1/KCNMB2/LEP/MIR21/MMP2/NOS3/NPPB/PTGS2/RHOA/ROCK1/SOD1/SOD2/SOD3/TNF	38
GO:0072073	BP	GO:0072073	kidney epithelium development	38/754	146/18614	1.3254e-20	1.73822e-19	6.17201e-20	ADIPOQ/AGT/AGTR2/BCL2/BMP2/BMP4/BMP7/CAT/CD34/CTNNB1/CXCR2/EDNRA/EFNB2/EPCAM/FGF1/FGF2/FGFR2/FOXJ1/GATA3/GREM1/LIF/MYC/PECAM1/PROM1/SDC1/SDC4/SHH/SMAD1/SMAD2/SMAD3/SMAD4/SMAD7/SOX9/STAT1/VEGFA/WNT1/WNT7B/YAP1	38
GO:0072006	BP	GO:0072006	nephron development	38/754	152/18614	6.1188e-20	7.59762e-19	2.69773e-19	ACTA2/ADIPOQ/AGT/AGTR2/ANGPT1/ANGPT2/BCL2/BMP2/BMP4/BMP7/CD34/CFLAR/CTNNB1/EDNRA/EGR1/FGF1/FGF2/FOXJ1/GATA3/GREM1/IL6R/ITGB3/LIF/MYC/PDGFB/PDGFRA/PDGFRB/PECAM1/PROM1/SHH/SMAD4/SOX9/STAT1/TEK/VEGFA/WNT1/WNT7B/YAP1	38
GO:0032368	BP	GO:0032368	regulation of lipid transport	38/754	153/18614	7.83411e-20	9.59978e-19	3.40864e-19	ABCA3/ADIPOQ/AGT/AGTR1/AKT1/AKT2/APOA1/APOE/CAV1/EDN1/EGF/FASLG/FURIN/IL1A/IL1B/ITGAV/ITGB3/LEP/LRP1/MAP2K6/MIF/MIR34A/NFKB1/NFKBIA/P2RX7/PLA2G4A/PPARA/PPARG/PRKCD/PTPN11/REN/RXRA/SHH/SIRT1/SPP1/THBS1/TNFSF11/TREM2	38
GO:0051147	BP	GO:0051147	regulation of muscle cell differentiation	38/754	161/18614	5.25036e-19	5.98819e-18	2.12626e-18	BCL2/BMP2/BMP4/BMPR2/DKK1/EDN1/EFNB2/ENG/EREG/FGF9/FGFR2/GSK3A/HDAC9/IGF1/IGF2/KIT/MAPK14/MDM2/MECP2/MIR145/MIR21/MIR34A/MMP14/MTOR/NFATC1/PDGFB/PPARA/SHH/SIRT1/SMAD1/SMAD4/SOD2/SRF/TGFB1/WNT3A/XBP1/YY1/ZEB1	38
GO:0030307	BP	GO:0030307	positive regulation of cell growth	38/754	164/18614	1.03756e-18	1.15514e-17	4.1016e-18	ADAM10/ADAM17/AKT1/BCL2/BMPR2/CD38/CDC42/CXCL12/CXCL16/CXCR4/EDN1/EGFR/ERBB2/F2/FN1/HBEGF/IGF1/IGFBP1/IL2/IL9/INS/KRT17/MMP14/MTOR/NGF/PTK2B/RHOA/S100A8/S100A9/SEMA7A/SMAD7/SPHK1/SRF/TGFB2/TGFBR1/VEGFA/WNT3A/YAP1	38
GO:0006469	BP	GO:0006469	negative regulation of protein kinase activity	38/754	217/18614	1.90476e-14	1.50659e-13	5.34954e-14	ABL1/ADAR/ADIPOQ/ADORA2A/AGT/AKT1/APC/APOE/BMP2/BMP4/BMP7/CASP3/CAV1/CDKN1A/CDKN2A/CEBPA/DUSP1/EPHB2/FABP4/HSPB1/IFNG/IL1B/IRAK3/LRP5/MIR34A/NUP62/PPARG/PRKCD/PTEN/PTPRC/PYCARD/SIRT1/SMPD1/SNCA/THY1/TNFAIP3/TSG101/UBASH3B	38
GO:0043270	BP	GO:0043270	positive regulation of monoatomic ion transport	38/754	231/18614	1.49326e-13	1.1032e-12	3.91718e-13	ABL1/AKT1/BAX/CAV1/CCL2/CCL3/CCL4/CCL5/CCR1/CCR2/CD19/CFTR/CX3CL1/CXCL10/CXCL11/CXCL12/CXCL9/EDN1/EDNRA/EPHB2/F2/F2R/IFNG/IL13/JAK3/KCNMB1/LEP/LGALS3/MIR21/MS4A1/P2RX7/PDGFB/PDGFRB/PINK1/PLA2G1B/SNCA/THY1/TREM2	38
GO:0051651	BP	GO:0051651	maintenance of location in cell	38/754	233/18614	1.97586e-13	1.43886e-12	5.10903e-13	ABL1/AKT1/ALB/APOE/ATG5/BAX/CAV1/CCL19/CCL21/CCL3/CCR5/CCR7/CD19/CD4/CX3CL1/CXCL10/CXCL11/CXCL9/DDIT3/F2/F2R/FASLG/FGF2/HSPA5/IL13/ITGB3/LCK/LCN2/P2RX7/PINK1/PTK2B/PTPRC/S100A8/S100A9/SNCA/THY1/TXN/UBASH3B	38
GO:0033673	BP	GO:0033673	negative regulation of kinase activity	38/754	239/18614	4.48794e-13	3.14549e-12	1.11689e-12	ABL1/ADAR/ADIPOQ/ADORA2A/AGT/AKT1/APC/APOE/BMP2/BMP4/BMP7/CASP3/CAV1/CDKN1A/CDKN2A/CEBPA/DUSP1/EPHB2/FABP4/HSPB1/IFNG/IL1B/IRAK3/LRP5/MIR34A/NUP62/PPARG/PRKCD/PTEN/PTPRC/PYCARD/SIRT1/SMPD1/SNCA/THY1/TNFAIP3/TSG101/UBASH3B	38
GO:0046883	BP	GO:0046883	regulation of hormone secretion	38/754	247/18614	1.28247e-12	8.63198e-12	3.065e-12	ADIPOQ/AGT/AGTR1/ALOX5/ANXA1/CCL5/CD38/CFTR/CREB1/EDN1/F2/F2RL1/FGB/GRP/HIF1A/HLA-DRB1/IFNG/IL11/IL1B/IL6/INS/JAK2/LEP/LIF/LRP5/MCU/NOS2/OSM/PDX1/PPARG/PTPN11/REN/SMAD4/SPP1/SYT7/TCIRG1/TNF/TNFSF11	38
GO:0090257	BP	GO:0090257	regulation of muscle system process	38/754	254/18614	3.09219e-12	1.99726e-11	7.09177e-12	ACE2/ADORA2B/AGT/AIF1/BECN1/CALCA/CAV1/CCN2/EDN1/F2R/FOXO3/GSK3A/HSP90AA1/IGF1/IGFBP5/IL6ST/KIT/MIR145/MIR200C/MIR21/NOS3/PARP1/PIK3CG/PPARA/PPARG/PTGS2/RHOA/ROCK1/SMAD3/SMAD4/SMAD7/SOD1/SPHK1/SRF/TNFRSF1A/TNFRSF1B/YY1/ZC3H12A	38
GO:0090596	BP	GO:0090596	sensory organ morphogenesis	38/754	269/18614	1.82352e-11	1.08635e-10	3.85737e-11	AQP5/ATF4/BAX/BCL2/BMP4/BMP7/CTNNB1/EDN1/EDNRA/EPHB2/FASLG/FAT1/FGF10/FGF2/FGF9/FGFR2/FZD3/GATA3/HIF1A/KDR/LRP5/MAFB/MAPK1/MAPK3/PITX2/PROM1/SOD1/SOX9/STAT3/THY1/TWIST1/VEGFA/WNT1/WNT3A/WNT5A/YY1/ZEB1/ZHX2	38
GO:0007265	BP	GO:0007265	Ras protein signal transduction	38/754	333/18614	8.96493e-09	3.76904e-08	1.33829e-08	ABL1/AGTR1/AIF1/APOA1/APOE/CDC42/CDKN1A/CDKN2A/COL1A2/COL3A1/CSF1/EPHB2/EPO/F2R/F2RL1/FGF10/FGF2/FOXM1/GNA13/IGF1/ITGB1/KITLG/KRAS/LPAR1/MET/NGF/NUP62/PDGFRB/PDPN/PIK3CG/PTH/RAC1/RHOA/ROCK1/SQSTM1/SRC/TGFB2/TP53	38
GO:0045786	BP	GO:0045786	negative regulation of cell cycle	38/754	404/18614	1.34631e-06	4.23463e-06	1.50361e-06	ABL1/APC/BCL2/BMP2/BMP4/BMP7/CASP3/CCL2/CCND1/CDKN1A/CDKN2A/CEBPA/CTNNB1/DUSP1/FZD3/GATA3/IL10/KLF4/LIF/MAPK14/MDM2/MIR21/MIR29A/MIR29B1/MIR29C/MUC1/PARP9/PTEN/PTGS2/PTPN11/SIRT1/SOX2/TGFB1/TNF/TNFAIP3/TP53/TRIM37/WAPL	38
GO:0098802	CC	GO:0098802	plasma membrane signaling receptor complex	38/756	319/19518	8.02791e-10	1.316e-08	9.35583e-09	ACVRL1/B2M/BMP2/CD4/CD40/CD79A/CD8A/CHUK/CSF2/CSF2RB/ERBB2/IGF1R/IL13RA1/IL2RA/IL2RB/IL6/IL6R/IL6ST/ITGA1/ITGAE/ITGAL/ITGAM/ITGAV/ITGAX/ITGB1/ITGB2/ITGB3/ITGB6/JAK2/PTK2B/TF/TFRC/TGFBR1/TGFBR2/TLR2/TRAF3/TRAF6/TYK2	38
GO:0008201	MF	GO:0008201	heparin binding	38/751	168/18369	3.39322e-18	1.50998e-16	1.03384e-16	ALK/ANGPTL3/APOE/APP/BMP4/BMP7/CCL7/CCL8/CCN2/CCN4/CXCL10/CXCL11/CXCL13/CXCL6/CXCL8/ELANE/F2/FGF1/FGF10/FGF2/FGF7/FGF9/FGFR1/FGFR2/FN1/FURIN/HBEGF/LXN/MPO/PF4/POSTN/PTPRC/SELL/SELP/SOD3/THBS1/VEGFA/VTN	38
GO:0033218	MF	GO:0033218	amide binding	38/751	400/18369	1.31415e-06	1.26823e-05	8.6832e-06	AGER/ANPEP/APOA1/APOE/C1QA/CD1A/CD1C/CD209/CMA1/CST3/ECE1/EPHB2/FASN/FCGR2B/FOLR2/FURIN/HLA-DRA/HLA-DRB1/IGF1R/ITGAM/ITGB2/LRP1/MAP1LC3B/MARCO/MSR1/NFATC1/NFKBIA/NOD2/PIK3R1/PLA2G4A/PPARG/PTGDR2/RELA/RXRA/TGFB2/TLR2/TLR4/TREM2	38
GO:1902893	BP	GO:1902893	regulation of miRNA transcription	37/754	68/18614	8.49316e-34	2.65708e-32	9.43462e-33	AR/BMP2/BMP4/EGFR/EGR1/ESR1/FGF2/FOS/FOSL1/FOXO3/GATA3/GATA6/HIF1A/IL10/JUN/KLF4/MRTFA/MYB/MYC/NR3C1/PDGFB/PPARA/PPARG/RELA/SMAD1/SMAD3/SMAD4/SOX9/SPI1/SRF/STAT3/TERT/TGFB1/TGFB2/TNF/TP53/YY1	37
GO:0061614	BP	GO:0061614	miRNA transcription	37/754	69/18614	1.76246e-33	5.36402e-32	1.90463e-32	AR/BMP2/BMP4/EGFR/EGR1/ESR1/FGF2/FOS/FOSL1/FOXO3/GATA3/GATA6/HIF1A/IL10/JUN/KLF4/MRTFA/MYB/MYC/NR3C1/PDGFB/PPARA/PPARG/RELA/SMAD1/SMAD3/SMAD4/SOX9/SPI1/SRF/STAT3/TERT/TGFB1/TGFB2/TNF/TP53/YY1	37
GO:0150076	BP	GO:0150076	neuroinflammatory response	37/754	76/18614	1.91547e-31	5.01244e-30	1.77979e-30	ADORA2A/AGER/AIF1/APP/C1QA/C5AR1/CCL3/CX3CL1/CX3CR1/IFNG/IGF1/IL13/IL18/IL1B/IL33/IL4/IL6/ITGAM/ITGB1/ITGB2/JAK2/JUN/LRP1/MMP3/MMP8/MMP9/NR3C1/PTGS2/PTPRC/SNCA/SPHK1/TLR2/TLR3/TLR9/TNF/TNFRSF1B/TREM2	37
GO:0007260	BP	GO:0007260	tyrosine phosphorylation of STAT protein	37/754	86/18614	5.62468e-29	1.25993e-27	4.47369e-28	CAV1/CCL5/CD40/CSF1R/CSF2/EPO/FLT3/IFNA2/IFNG/IGF1/IL12B/IL13/IL15/IL18/IL2/IL21/IL23A/IL24/IL3/IL4/IL6/IL6R/IL6ST/JAK1/JAK2/JAK3/KIT/LEP/LIF/MIR146A/OSM/PARP9/SOCS1/SOCS3/TNF/TNFRSF1A/TSLP	37
GO:2000106	BP	GO:2000106	regulation of leukocyte apoptotic process	37/754	90/18614	4.21006e-28	8.66777e-27	3.07771e-27	ADAM17/ANXA1/AXL/BAX/BCL2/BCL2L1/BMP4/BTK/CCL19/CCL21/CCL5/CCR7/CD27/CD274/CDKN2A/CXCL12/CXCR2/HIF1A/IDO1/IL10/IL2/IL7R/IRF7/JAK3/KITLG/LGALS3/LGALS9/MERTK/MIF/NOD2/P2RX7/PDCD1/PIK3CD/RIPK3/SIRT1/TP53/WNT5A	37
GO:0032147	BP	GO:0032147	activation of protein kinase activity	37/754	109/18614	1.37803e-24	2.34559e-23	8.32861e-24	ABL1/AGT/ANGPT1/AXIN1/CALCA/CCL5/CD86/CHI3L1/FGF1/IGF1/IL12B/IL18/IL23A/IL4/IL6R/INS/ITGB3/JAK2/LEP/MAP3K7/MIR21/MTOR/PDGFB/PINK1/PRKCD/PTK2B/RIPK3/SOCS1/SRC/TGFB2/TGFBR2/TLR3/TNFRSF10B/TRAF6/TXN/VEGFA/WNT5A	37
GO:1901222	BP	GO:1901222	regulation of NIK/NF-kappaB signaling	37/754	110/18614	1.99832e-24	3.3911e-23	1.20409e-23	AGER/APP/BMP7/CCL19/CD14/CD27/CD86/EDN1/EGFR/EP300/GREM1/IL12B/IL18/IL1B/IL23A/LGALS9/MIR146A/MIR21/MIR29B1/MMP8/NFKBIA/NLRP3/NOD2/RELA/RHOA/SPHK1/SPI1/TLR2/TLR3/TLR4/TLR7/TLR9/TNF/TNFSF14/TRAF6/TREM2/ZC3H12A	37
GO:0002526	BP	GO:0002526	acute inflammatory response	37/754	114/18614	8.45149e-24	1.36787e-22	4.85697e-23	A2M/APCS/BTK/C3/CCR7/CD163/CEBPB/CRP/CXCR2/ELANE/EPO/F2/F3/FCGR1A/FCGR2B/FCGR3A/FN1/GATA3/IL1A/IL1B/IL22/IL4/IL6/IL6R/IL6ST/INS/KL/NLRP3/OSM/PIK3CG/PTGS2/S100A8/SERPINA1/TFRC/TNF/TNFSF11/VCAM1	37
GO:1904892	BP	GO:1904892	regulation of receptor signaling pathway via STAT	37/754	116/18614	1.69448e-23	2.69576e-22	9.57198e-23	AGT/CAV1/CCL5/EGF/EPHB2/F2/F2R/IFNA1/IFNA2/IFNB1/IFNG/IL10/IL10RA/IL12B/IL23A/IL24/IL4/IL5/IL6/IL6R/IL7R/IL9/JAK2/JAK3/KIT/LEP/LIF/MIR146A/PPARG/PTK2B/PTPRC/SOCS1/SOCS3/TGFB1/TNF/TSLP/TYK2	37
GO:0050868	BP	GO:0050868	negative regulation of T cell activation	37/754	131/18614	1.95719e-21	2.74006e-20	9.72928e-21	ADORA2A/ANXA1/ARG1/BMP4/CASP3/CD274/CD80/CD86/CEBPB/CTLA4/ERBB2/FCGR2B/FOXJ1/FOXP3/HLA-DRB1/HMGB1/IDO1/IFNA2/IFNB1/IL10/IL2/IL2RA/IL4/IL4R/IRF1/JAK3/LGALS3/LGALS9/MIR21/SCGB1A1/SDC4/SFTPD/SHH/SMAD7/SOCS1/TBX21/ZC3H12A	37
GO:0001909	BP	GO:0001909	leukocyte mediated cytotoxicity	37/754	139/18614	1.84807e-20	2.40121e-19	8.5261e-20	AGER/ARG1/B2M/CD1A/CD1C/CD2/CX3CR1/CXCL6/ELANE/F2/F2RL1/FCGR1A/FCGR2B/FCGR3A/GZMB/HLA-DRA/HLA-DRB1/HPRT1/ICAM1/IL12B/IL18/IL21/IL23A/IL7R/ITGAM/KLRB1/LAMP1/LEP/LGALS9/MYD88/NOS2/P2RX7/PTPRC/RIPK3/SPI1/TGFB1/TREM1	37
GO:0046328	BP	GO:0046328	regulation of JNK cascade	37/754	139/18614	1.84807e-20	2.40121e-19	8.5261e-20	AGER/APP/AXIN1/CCL19/CCL21/CCN2/CCR7/CD27/EGFR/F2RL1/FCGR2B/HMGB1/IGF1R/IL1A/IL1B/LTBR/MAP2K7/MMP8/MYD88/NOD2/NOX1/PINK1/PTK2B/PYCARD/RIPK2/SIRPA/TLR3/TLR4/TLR9/TNF/TNFSF11/TRAF3/TRAF6/WNT5A/WNT7A/WNT7B/XIAP	37
GO:0043535	BP	GO:0043535	regulation of blood vessel endothelial cell migration	37/754	152/18614	5.02863e-19	5.747e-18	2.04062e-18	ABL1/ACVRL1/ADAM17/AGTR2/AKT1/ANGPT1/ANGPT2/ANGPT4/ANXA1/APOE/CD40/FGF2/FGFR1/HDAC9/HIF1A/HMGB1/HMOX1/HSPB1/KDR/KLF4/MECP2/MIR126/MIR146A/MIR200C/MIR29C/NFE2L2/NOS3/PDGFB/PPARG/PTGS2/RHOA/SIRT1/STAT5A/TGFB1/THBS1/TNF/VEGFA	37
GO:0030856	BP	GO:0030856	regulation of epithelial cell differentiation	37/754	166/18614	1.18584e-17	1.22976e-16	4.36657e-17	ACVRL1/BMP2/BMP4/BMP7/CAV1/CCND1/CDH5/CEBPB/CTNNB1/FGF10/FGF2/FOXJ1/GATA3/IFNG/IL13/IL1A/IL1B/KEAP1/KRAS/LIF/MIR200C/MIR21/MIR29B1/MIR34A/MMP9/PROM1/ROCK1/S1PR2/SERPINE1/SOX9/STAT1/TNF/TNFRSF1A/TP63/VEGFA/YAP1/ZEB1	37
GO:0035265	BP	GO:0035265	organ growth	37/754	180/18614	1.99433e-16	1.87072e-15	6.64248e-16	ABL1/AGT/AKT1/AR/BCL2/DUSP6/EDN1/ESR1/FGF10/FGF2/FGF7/FGF9/FGFR2/GATA6/GLI1/GSK3A/IGF1/IGF2/IL7/LEP/MAPK14/MMP13/PDGFRB/PPARA/PTEN/PTPN11/S1PR1/SHH/SMAD1/SMAD2/SOD1/SOX9/TGFB2/TGFBR1/TGFBR2/YAP1/YY1	37
GO:0043409	BP	GO:0043409	negative regulation of MAPK cascade	37/754	183/18614	3.51443e-16	3.23166e-15	1.14748e-15	ABL1/ACE2/ADIPOQ/AGT/APOE/ATF3/BMP2/BMP4/BMP7/CAV1/DUSP1/DUSP6/EPHB2/F2RL1/FOXM1/IGF1R/IL1B/IRAK3/LIF/MIR200C/MIR21/MIR29B1/MYC/NUP62/P2RX7/PINK1/PPARG/PRKCD/PTEN/PTPRC/SIRPA/SMAD4/SMPD1/TIMP3/TLR4/TLR9/TREM2	37
GO:1901888	BP	GO:1901888	regulation of cell junction assembly	37/754	214/18614	6.38091e-14	4.86165e-13	1.72625e-13	ABL1/ACE/ACE2/ACVRL1/AGT/APP/CAV1/CTNNB1/DKK1/EPHB2/GREM1/IL17A/IL1B/KDR/MMP14/PTEN/PTK2/PTK2B/RAC1/RHOA/ROCK1/SDC4/SMAD3/SNAI1/SNAI2/SNCA/SRC/TEK/THBS1/THY1/TJP1/TLR2/TNF/VEGFA/WNT3A/WNT5A/WNT7A	37
GO:0010466	BP	GO:0010466	negative regulation of peptidase activity	37/754	236/18614	1.41767e-12	9.5191e-12	3.37999e-12	A2M/ADORA2A/AKT1/APP/CD27/CD44/CST3/CTSB/GAPDH/HGF/IL9/KLF4/LAMP3/LRP1/LXN/MIR29B1/MIR29C/MMP9/NGF/PLAUR/PTGS2/RENBP/SERPINA1/SERPINE1/SERPINH1/SNCA/SRC/THBS1/TIMP1/TIMP2/TIMP3/TIMP4/TNF/TNFSF14/VEGFA/VTN/XIAP	37
GO:0051962	BP	GO:0051962	positive regulation of nervous system development	37/754	280/18614	2.38187e-10	1.24194e-09	4.40983e-10	ACE/BMP2/BMPR2/CTNNB1/CX3CL1/CX3CR1/CXCL12/CXCR4/EPHB2/FGF2/FN1/FZD3/HIF1A/IFNG/IL1B/IL33/IL6/IL6ST/ITGB1/KIT/KRAS/LIF/MAP2K1/MECP2/MTOR/NGF/PLXNA2/SEMA7A/SHH/SRF/TGFB1/TLR2/TNF/TNFRSF1B/VEGFA/WNT3A/WNT7A	37
GO:0050890	BP	GO:0050890	cognition	37/754	317/18614	7.66685e-09	3.2526e-08	1.15492e-08	ABL1/AGER/AGT/APOE/APP/ATXN1/B2M/C5AR1/CASP3/CCL11/CEBPB/CREB1/CX3CR1/DKK1/EGFR/EP300/EPHB2/FOS/FOSL1/HIF1A/HLA-DRA/INS/ITGB1/KIT/KRAS/LGMN/MAPK1/MECP2/NGF/PTEN/PTGS2/S100B/SRC/SRF/TLR2/TNF/TREM2	37
GO:0032386	BP	GO:0032386	regulation of intracellular transport	37/754	332/18614	2.63967e-08	1.03558e-07	3.67709e-08	ADIPOQ/AKT2/ANGPT1/BBC3/BMP4/CDH1/ERBB2/GSK3A/GSK3B/GZMB/HPS4/HSP90AA1/IFI27/IFNG/IL1B/ITGAM/ITGB2/JAK2/LAMP1/LEP/MAP2K1/MAPK1/MAPK14/MAPK3/MAPK8/MAVS/PIK3R1/PINK1/PRKCD/PTGS2/PTPN11/SHH/SMAD3/SRC/TGFB1/TXN/ZC3H12A	37
GO:0042886	BP	GO:0042886	amide transport	37/754	349/18614	9.67675e-08	3.5395e-07	1.25679e-07	ADORA2A/ALOX5/ANXA1/CA2/CCL5/CD209/CD38/CFTR/EDN1/F2/F2RL1/FGB/FOLR2/GRP/HIF1A/HLA-DRB1/IFNG/IL1B/IL1RN/IL6/INS/ITGB1/JAK2/LEP/LRP5/MCU/NOS2/P2RX7/PDX1/PTPN11/S100A8/SMAD2/SNCA/SYT7/TCIRG1/TNF/TNFSF11	37
GO:0032535	BP	GO:0032535	regulation of cellular component size	37/754	354/18614	1.39114e-07	4.97471e-07	1.7664e-07	ABL1/APOE/BMPR2/CCL11/CCL21/CCL24/CCL26/CCR7/CDH1/CREB1/CSF3/CXCL12/EDN1/ELN/F2RL1/FN1/GSK3B/HSP90AA1/IL7R/MTOR/NGF/P2RX7/PRKCD/PTEN/PTK2B/PYCARD/RAC1/RHOA/SEMA7A/SPP1/SRF/VEGFA/WNT3A/WNT5A/WNT7A/WNT7B/XK	37
GO:0030666	CC	GO:0030666	endocytic vesicle membrane	37/756	196/19518	8.94152e-16	2.93154e-14	2.08411e-14	ACE2/APOE/AREG/ATG5/B2M/CAV1/CD163/CD207/CD4/CD9/CFTR/CYBB/EGF/EGFR/EREG/FCGR1A/HBEGF/HLA-DRA/HLA-DRB1/IL7R/LAMP1/LRP1/MARCO/MDM2/MSR1/NOS3/SYT7/TCIRG1/TF/TFRC/TGFA/TLR2/WNT1/WNT3A/WNT5A/WNT7A/WNT7B	37
GO:0016324	CC	GO:0016324	apical plasma membrane	37/756	381/19518	2.96801e-07	3.16818e-06	2.25235e-06	ACE2/ADAM17/AGER/ANXA1/AQP5/CD34/CD44/CDH2/CFTR/CLDN4/CTSB/CTSK/CTSL/DPP4/ENPP3/EPCAM/ERBB2/FAT1/FN1/FZD3/HSP90AA1/IGFBP2/IL6R/ITGB3/KL/MUC1/OCLN/PDGFRB/PDPN/PROM1/PTEN/SLC2A1/TCIRG1/TEK/TF/THY1/TLR9	37
GO:0042379	MF	GO:0042379	chemokine receptor binding	37/751	74/18369	7.45218e-32	8.52742e-30	5.83847e-30	CCL1/CCL11/CCL13/CCL17/CCL18/CCL19/CCL2/CCL20/CCL21/CCL22/CCL24/CCL26/CCL3/CCL4/CCL5/CCL7/CCL8/CCR2/CX3CL1/CX3CR1/CXCL1/CXCL10/CXCL11/CXCL12/CXCL13/CXCL14/CXCL16/CXCL2/CXCL3/CXCL5/CXCL6/CXCL8/CXCL9/JAK1/PF4/PPBP/STAT1	37
GO:0002294	BP	GO:0002294	CD4-positive, alpha-beta T cell differentiation involved in immune response	36/754	71/18614	1.90195e-31	5.00042e-30	1.77553e-30	ANXA1/CCL19/CD80/CD86/FOXP3/GATA3/HLA-DRA/HLA-DRB1/HMGB1/IFNG/IL12B/IL18/IL2/IL21/IL23A/IL27/IL4/IL4R/IL6/IL6R/IRF4/JAK3/JUNB/LEF1/LGALS9/MIR21/MTOR/MYB/NLRP3/RIPK2/RORC/SMAD7/STAT3/STAT6/TBX21/ZC3H12A	36
GO:0002287	BP	GO:0002287	alpha-beta T cell activation involved in immune response	36/754	72/18614	3.66074e-31	9.44707e-30	3.35442e-30	ANXA1/CCL19/CD80/CD86/FOXP3/GATA3/HLA-DRA/HLA-DRB1/HMGB1/IFNG/IL12B/IL18/IL2/IL21/IL23A/IL27/IL4/IL4R/IL6/IL6R/IRF4/JAK3/JUNB/LEF1/LGALS9/MIR21/MTOR/MYB/NLRP3/RIPK2/RORC/SMAD7/STAT3/STAT6/TBX21/ZC3H12A	36
GO:0002293	BP	GO:0002293	alpha-beta T cell differentiation involved in immune response	36/754	72/18614	3.66074e-31	9.44707e-30	3.35442e-30	ANXA1/CCL19/CD80/CD86/FOXP3/GATA3/HLA-DRA/HLA-DRB1/HMGB1/IFNG/IL12B/IL18/IL2/IL21/IL23A/IL27/IL4/IL4R/IL6/IL6R/IRF4/JAK3/JUNB/LEF1/LGALS9/MIR21/MTOR/MYB/NLRP3/RIPK2/RORC/SMAD7/STAT3/STAT6/TBX21/ZC3H12A	36
GO:0002292	BP	GO:0002292	T cell differentiation involved in immune response	36/754	80/18614	4.40502e-29	9.94683e-28	3.53187e-28	ANXA1/CCL19/CD80/CD86/FOXP3/GATA3/HLA-DRA/HLA-DRB1/HMGB1/IFNG/IL12B/IL18/IL2/IL21/IL23A/IL27/IL4/IL4R/IL6/IL6R/IRF4/JAK3/JUNB/LEF1/LGALS9/MIR21/MTOR/MYB/NLRP3/RIPK2/RORC/SMAD7/STAT3/STAT6/TBX21/ZC3H12A	36
GO:0002444	BP	GO:0002444	myeloid leukocyte mediated immunity	36/754	110/18614	2.48403e-23	3.91847e-22	1.39135e-22	ACE/ADAM17/ADORA2B/ARG1/BTK/C3/CCL3/CCR2/CX3CR1/CXCL6/ELANE/F2/F2RL1/FCGR1A/FCGR2B/FCGR3A/GRP/HMOX1/IL13/IL13RA2/IL4/IL4R/IL6/ITGAM/ITGB2/KIT/LGALS9/MAVS/MYD88/PIK3CD/PIK3CG/PLA2G1B/PTGDS/SPI1/TICAM1/TREM1	36
GO:0014812	BP	GO:0014812	muscle cell migration	36/754	110/18614	2.48403e-23	3.91847e-22	1.39135e-22	ACE/ADIPOQ/AGT/AIF1/ANXA1/BCL2/BMP4/CCL5/CCN4/DDIT3/FGF9/GNA13/HAS2/IGF1/IGFBP3/IGFBP5/ITGB3/LPAR1/LRP1/MIR146A/MIR21/MIR34A/NFE2L2/PDGFA/PDGFB/PDGFRB/PLAT/PLAU/RHOA/ROCK1/S1PR2/SERPINE1/SRC/TERT/TLR4/VTN	36
GO:0002761	BP	GO:0002761	regulation of myeloid leukocyte differentiation	36/754	123/18614	1.80985e-21	2.54652e-20	9.04205e-21	ADIPOQ/APCS/CASP8/CCL3/CCR1/CD4/CEBPB/CREB1/CSF1/CTNNB1/FOS/HLA-DRB1/IFNG/IL12B/IL17A/IL23A/IL4/IL5/IRF7/KITLG/LEF1/LIF/MAFB/MIR145/MTOR/MYC/PF4/PIK3R1/TGFB1/TLR3/TLR4/TNF/TNFSF11/TRAF6/TREM2/UBASH3B	36
GO:0042476	BP	GO:0042476	odontogenesis	36/754	135/18614	5.71085e-20	7.13856e-19	2.53473e-19	ADM/AQP5/AXIN2/BAX/BMP2/BMP4/BMP7/BSG/CD34/CFTR/COL1A1/COL1A2/CSF1/CTNNB1/EDN1/FGF10/FGFR2/GATA6/GLI2/ITGB6/LEF1/PDGFRA/PITX2/PPARA/RHOA/SDC1/SERPINE1/SHH/SRC/TCIRG1/TGFB2/TGFB3/TNFSF11/TP63/TRAF6/TWIST1	36
GO:2001235	BP	GO:2001235	positive regulation of apoptotic signaling pathway	36/754	140/18614	2.1369e-19	2.53531e-18	9.00225e-19	ADORA2A/AGT/AGTR2/ATF3/BAX/BBC3/BECN1/BID/CAV1/CTSK/CTSL/DDIT3/FAS/IFNB1/JAK2/LCK/LTBR/MCL1/MYC/NOX1/PRKCD/PTEN/PTPRC/PYCARD/RIPK3/S100A8/S100A9/SIRT1/SOD1/TGFBR1/THBS1/TIMP3/TNF/TNFSF10/TP53/TP63	36
GO:2001056	BP	GO:2001056	positive regulation of cysteine-type endopeptidase activity	36/754	142/18614	3.55986e-19	4.15317e-18	1.47469e-18	AIM2/BAX/BBC3/BID/CASP1/CASP8/CASP9/CCN2/CTSD/CYCS/EIF2AK3/F2R/F3/FAS/FASLG/HMGB1/JAK2/LCK/LGALS9/LGMN/MYC/NLRC4/NLRP1/NLRP3/PPARG/PYCARD/RHOA/RIPK2/S100A8/S100A9/SIRT1/SMAD3/SNCA/TNF/TNFSF10/WNT3A	36
GO:0045598	BP	GO:0045598	regulation of fat cell differentiation	36/754	146/18614	9.60494e-19	1.07575e-17	3.81973e-18	ADIPOQ/AKT1/ALOX5/AXIN1/AXIN2/BMP2/BMP7/CCN4/CEBPA/CEBPB/CREB1/DDIT3/GATA3/IL6/INS/LEP/LRP5/MAPK14/MIR21/MIR29B1/MMP11/PPARG/PTGS2/RORC/SIRT1/SMAD3/SNAI2/SOD2/TGFB1/TNF/WNT1/WNT3A/WNT5A/XBP1/YAP1/ZC3H12A	36
GO:0062013	BP	GO:0062013	positive regulation of small molecule metabolic process	36/754	146/18614	9.60494e-19	1.07575e-17	3.81973e-18	ADIPOQ/ADM/ADORA2B/AKT1/AKT2/ANXA1/APOA1/APOE/APP/FGF1/GPT/HIF1A/IFNG/IGF1/IGF2/IL1B/IL4/INS/MTOR/NOS2/NOS3/P2RX7/PINK1/PPARA/PPARGC1A/PRKAA2/PTGS2/PTH/SIRT1/SNCA/SRC/STAR/TAFAZZIN/TNF/TREM2/TWIST1	36
GO:0045667	BP	GO:0045667	regulation of osteoblast differentiation	36/754	147/18614	1.22407e-18	1.36007e-17	4.82929e-18	AREG/ATF4/AXIN2/BMP2/BMP4/BMP7/BMPR2/CCN4/CEBPA/CEBPB/CTNNB1/FGF2/FGFR2/GLI1/GREM1/HGF/IGF1/IGFBP5/IL6/IL6R/IL6ST/LRP5/MIR200C/MIR21/PPARG/PTK2/SMAD1/SMAD3/SNAI2/SOX9/TCIRG1/TNF/TP63/TWIST1/WNT7B/YAP1	36
GO:0001890	BP	GO:0001890	placenta development	36/754	152/18614	3.98461e-18	4.27468e-17	1.51783e-17	ADM/AKT1/BMP7/BMPR2/BSG/CASP8/CEBPA/CEBPB/CSF2/CTSB/EGFR/FGFR2/FOSL1/HIF1A/IGF2/IL10/JUNB/KRT19/KRT8/LEF1/LEP/LIF/MAP2K1/MAPK1/MAPK14/PARP1/PDGFB/PPARG/PTGS2/PTK2/SNAI1/SOCS3/SOD1/SPP1/TFEB/WNT7B	36
GO:0007584	BP	GO:0007584	response to nutrient	36/754	156/18614	9.87453e-18	1.02783e-16	3.64958e-17	A2M/ADIPOQ/ARG1/BECN1/BMP7/CAT/CCND1/COL1A1/CXCL10/CYBB/EPO/FOLR2/HMOX1/IGF1R/IGFBP2/IL15/IL1A/KL/LEP/MTOR/NOD2/PDX1/POSTN/PPARG/PTGS2/PTH/RXRA/SNAI2/SOD2/SPP1/SRF/STAT1/TFRC/TGFBR2/VCAM1/XBP1	36
GO:0036294	BP	GO:0036294	cellular response to decreased oxygen levels	36/754	157/18614	1.23295e-17	1.27625e-16	4.53164e-17	AKT1/ANGPT4/ATF4/BCL2/BMP7/CD34/CFLAR/CYBB/EDN1/EGR1/FOS/GATA6/HIF1A/HMOX1/KCNMB1/MALAT1/MDM2/MIR126/MIR145/MIR146A/MIR21/MIR34A/MTOR/MYC/NFE2L2/PINK1/PPARG/PTGS2/SIRT1/SRC/TERC/TERT/TP53/TREM2/TWIST1/VEGFA	36
GO:0035051	BP	GO:0035051	cardiocyte differentiation	36/754	161/18614	2.94172e-17	2.95756e-16	1.05016e-16	AGT/ATG5/BMP2/BMP4/BMP7/CDC42/DKK1/EDN1/EDNRA/EFNB2/EGFR/GATA6/GREM1/GSK3A/IGF1/ITGB1/KDM6B/MAPK1/MAPK3/MIR145/MIR21/MTOR/NOX4/PDGFRA/PDGFRB/PITX2/PPARA/SMAD4/SRF/TGFB1/TGFB2/TWIST1/VCAM1/VEGFA/WNT3A/YY1	36
GO:0002262	BP	GO:0002262	myeloid cell homeostasis	36/754	171/18614	2.2917e-16	2.13892e-15	7.59479e-16	ADAM17/ADAR/ANXA1/AXL/B2M/BAX/BMP4/BTK/CASP3/CFLAR/CSF1/CXCR2/EPO/FOXO3/FOXP3/GATA3/HIF1A/HMGB1/HMOX1/HSPA1A/IL6/ISG15/JAK2/KIT/KITLG/MAFB/MAPK14/MERTK/MYB/PIK3CD/SOD1/SPI1/SRF/STAT1/STAT3/VEGFA	36
GO:0050680	BP	GO:0050680	negative regulation of epithelial cell proliferation	36/754	177/18614	7.28053e-16	6.48187e-15	2.30155e-15	ACVRL1/ALOX5/APOE/AR/B2M/BMP4/CAV1/CCL2/EFNB2/EREG/FGFR2/FLT1/GATA3/IL12B/IRF6/MIR126/MIR146A/MIR21/MIR29B1/MIR29C/MIR34A/PDX1/PPARG/SLURP1/SNAI2/SOX2/SOX9/SPARC/STAT1/TGFB1/TGFB2/TGFBR1/THBS1/TNF/WNT5A/ZEB1	36
GO:0043583	BP	GO:0043583	ear development	36/754	221/18614	8.89941e-13	6.10744e-12	2.1686e-12	ADAM10/ATG5/BCL2/BMP2/BMP4/CEBPA/ECE1/EDN1/EDNRA/EPHB2/FGF10/FGF2/FGF9/FGFR2/FZD3/GATA3/LGR5/MAFB/MAPK1/MAPK3/MAPKAPK2/PDGFA/PDGFRB/PTPN11/SDC4/SHH/SOD1/SOX2/SOX9/TGFB2/TGFB3/TWIST1/WNT1/WNT3A/WNT5A/ZEB1	36
GO:0050769	BP	GO:0050769	positive regulation of neurogenesis	36/754	232/18614	3.89733e-12	2.48577e-11	8.82635e-12	ACE/BMP2/BMPR2/CTNNB1/CX3CL1/CX3CR1/CXCL12/CXCR4/EPHB2/FGF2/FN1/FZD3/HIF1A/IFNG/IL1B/IL33/IL6/IL6ST/ITGB1/KIT/KRAS/LIF/MAP2K1/MECP2/MTOR/NGF/PLXNA2/SEMA7A/SHH/SRF/TGFB1/TLR2/TNF/TNFRSF1B/VEGFA/WNT3A	36
GO:0009743	BP	GO:0009743	response to carbohydrate	36/754	234/18614	5.04435e-12	3.16331e-11	1.12321e-11	ACE/ADIPOQ/AGER/ANGPT2/CASP3/CAT/CCN2/CFTR/CMA1/EGR1/ERN1/HIF1A/HLA-DRB1/IGF1R/IL1A/IL1B/LEP/LRP5/MAP2K6/MAP2K7/MIR146A/NOX4/PDX1/PRKAA2/PTGS2/PTK2B/RHOA/SMAD2/SMAD4/SOD2/SRF/TGFBR2/THBS1/TNF/TREM2/XBP1	36
GO:0003015	BP	GO:0003015	heart process	36/754	259/18614	9.93846e-11	5.4245e-10	1.92611e-10	ACE/ACE2/ADM/AGT/AGTR2/ATG5/CALCA/CAV1/CCN2/CDC42/CXCR4/DES/EDN1/EDNRA/GATA6/GSK3A/HBEGF/HSP90AA1/IL2/JAK2/MAP2K6/MDM2/MIR200C/MTOR/NOS3/NOX4/PIK3CG/S100A1/SMAD7/SOD1/SRC/TAFAZZIN/TGFB2/TNF/YAP1/ZC3H12A	36
GO:0090068	BP	GO:0090068	positive regulation of cell cycle process	36/754	262/18614	1.38224e-10	7.37195e-10	2.6176e-10	ADAM17/AIF1/AKT1/ANXA1/APP/BECN1/CCN2/CCND1/CD28/CDC42/CXCR5/EDN1/EGF/EGFR/EREG/FGF10/GLI1/IGF1/IGF1R/IGF2/IL1A/IL1B/INS/LRP5/MDM2/MECP2/MIR29A/NUP62/PDGFB/PDGFRB/RHOA/SPHK1/TERT/TGFA/TNF/WNT5A	36
GO:0006887	BP	GO:0006887	exocytosis	36/754	351/18614	3.26504e-07	1.11218e-06	3.94907e-07	ADORA2B/ANXA1/BTK/CCL3/CCL5/CCL8/CCR1/CCR2/CFTR/F2RL1/FCGR2B/FCGR3A/FGB/GRP/HMOX1/IFNG/IL13/IL13RA2/IL4/IL4R/ITGAM/ITGB2/KIT/LAMP1/LGALS9/P2RX7/PIK3CD/PIK3CG/PTGDS/SDC1/SDC4/SNCA/SPI1/SYT7/TSG101/WNT7A	36
GO:0004674	MF	GO:0004674	protein serine/threonine kinase activity	36/751	421/18369	2.57174e-05	0.000196673	0.000134656	ACVRL1/AKT1/AKT2/BMPR2/CCL3/CHUK/EGFR/EIF2AK3/ERN1/FASTK/GSK3A/GSK3B/IRAK3/LTBP1/MAP2K1/MAP2K6/MAP2K7/MAP3K7/MAPK1/MAPK14/MAPK3/MAPK8/MAPKAPK2/MTOR/PIK3CG/PINK1/PRKAA2/PRKCD/PTK2B/RIPK2/RIPK3/ROCK1/SQSTM1/TBK1/TGFBR1/TGFBR2	36
GO:0042509	BP	GO:0042509	regulation of tyrosine phosphorylation of STAT protein	35/754	82/18614	2.49096e-27	4.98191e-26	1.76895e-26	CAV1/CCL5/CD40/CSF1R/CSF2/EPO/FLT3/IFNA2/IFNG/IGF1/IL12B/IL13/IL15/IL18/IL2/IL21/IL23A/IL24/IL3/IL4/IL6/IL6R/IL6ST/JAK2/KIT/LEP/LIF/MIR146A/OSM/PARP9/SOCS1/SOCS3/TNF/TNFRSF1A/TSLP	35
GO:2001237	BP	GO:2001237	negative regulation of extrinsic apoptotic signaling pathway	35/754	99/18614	5.18954e-24	8.44808e-23	2.9997e-23	AKT1/AR/BCL2/BCL2L1/BMP4/CFLAR/CSF2/CX3CL1/FGB/FGF10/GSK3B/HGF/HMOX1/HSPA1A/ICAM1/IGF1/IL1A/IL1B/IL4/IL7/ITGAV/LGALS3/MCL1/NOS3/PF4/RELA/SERPINE1/SNAI2/SRC/TERT/TGFBR1/THBS1/TNF/TNFAIP3/YAP1	35
GO:0002456	BP	GO:0002456	T cell mediated immunity	35/754	125/18614	3.29368e-20	4.24992e-19	1.50904e-19	AGER/AHR/ARG1/B2M/CCR2/CD1A/CD1C/CD8A/FCGR2B/FOXP3/GATA3/HLA-DRA/HLA-DRB1/HMGB1/HPRT1/IFNA2/IFNB1/IL12B/IL18/IL1B/IL1R1/IL23A/IL4/IL6/IL7R/MAP3K7/NLRP3/NOD2/P2RX7/PTPRC/RIPK3/SMAD7/TBX21/TNFRSF1B/TRAF6	35
GO:0002708	BP	GO:0002708	positive regulation of lymphocyte mediated immunity	35/754	126/18614	4.38861e-20	5.611e-19	1.99233e-19	B2M/BTK/C3/CD1A/CD1C/CD28/CD40/FCER2/FCGR1A/FOXP3/GATA3/HLA-DRA/HLA-DRB1/IL12B/IL18/IL1B/IL1R1/IL2/IL21/IL23A/IL4/IL6/LAMP1/MAP3K7/NLRP3/NOD2/P2RX7/PTPRC/STAT6/TBX21/TFRC/TGFB1/TNF/TRAF6/TREM2	35
GO:0003158	BP	GO:0003158	endothelium development	35/754	137/18614	8.54622e-19	9.62954e-18	3.41921e-18	ACVRL1/BMP4/BMPR2/CD34/CDH5/CTNNB1/CXCL10/CXCR4/EDNRA/F2RL1/FASN/FGF1/FOXP3/ICAM1/IL1B/ITGAX/KDM6B/KDR/MET/MIR200C/MIR21/MIR34A/MYD88/PDPN/PECAM1/RHOA/ROCK1/S1PR1/S1PR2/SMAD4/TJP1/TNF/TNFRSF1A/VEGFA/ZEB1	35
GO:0007204	BP	GO:0007204	positive regulation of cytosolic calcium ion concentration	35/754	179/18614	6.56035e-15	5.34759e-14	1.8988e-14	ABL1/ADM/AGT/AGTR1/BAX/BCL2/C5AR1/CALCA/CAV1/CCL1/CCR1/CD38/CXCL13/EDN1/EDNRA/EPO/ESR1/F2R/F2RL1/FPR1/GNA13/HMGB1/IL2/ITGAV/JAK2/JAK3/LPAR1/P2RX7/PDGFRA/PIK3CG/PLA2G1B/PTGER2/PTK2B/S1PR1/TAC1	35
GO:0042594	BP	GO:0042594	response to starvation	35/754	207/18614	6.03717e-13	4.19977e-12	1.49123e-12	ADM/ALB/ATF3/ATF4/ATG5/BCL2/BECN1/BMPR2/CDKN1A/CTSK/DDIT3/EIF2AK3/FAS/FOS/FOXO3/GPT/HSPA5/IGF1R/KRT20/MAP1LC3A/MAP1LC3B/MAPK1/MAPK3/MAPK8/MTOR/NFE2L2/PPARA/PPARGC1A/PRKAA2/SIRT1/SLC2A1/TFEB/TP53/XBP1/ZC3H12A	35
GO:0060560	BP	GO:0060560	developmental growth involved in morphogenesis	35/754	234/18614	2.26272e-11	1.33241e-10	4.73105e-11	ABL1/APOE/APP/AREG/BMP4/BMPR2/CCL11/CDH1/CSF1/CTNNB1/CXCL12/CXCR4/EDN1/EDNRA/ESR1/FGF1/FGF10/FGFR2/FN1/GSK3B/HSP90AA1/ITGB1/NGF/S1PR1/SEMA7A/SHH/SOX9/SPP1/SRF/TGFBR2/VEGFA/WNT3A/WNT5A/WNT7B/YAP1	35
GO:0044262	BP	GO:0044262	cellular carbohydrate metabolic process	35/754	290/18614	8.22049e-09	3.46908e-08	1.23179e-08	ADIPOQ/AKT1/AKT2/ANGPTL3/B3GNT2/EP300/GLB1/GPT/GSK3A/GSK3B/HAS1/HAS2/IGF1/IGF2/IGFBP3/IL6ST/INS/ISYNA1/LEP/MECP2/MTOR/NR3C1/PFKFB3/PLA2G4A/PPARA/PPARGC1A/PTEN/PTH/PTK2B/RORC/SIRT1/SNCA/SRC/STAT3/TP53	35
GO:0008202	BP	GO:0008202	steroid metabolic process	35/754	323/18614	1.26015e-07	4.52363e-07	1.60623e-07	ADM/ANGPTL3/APOA1/APOE/APP/BMP2/CAT/CEBPA/CFTR/EGR1/ESR1/FGF1/IFNG/IGF1R/IL1A/IL4/KIT/LEP/LGMN/LRP5/MECP2/NFKB1/NR3C1/PDGFRA/PRKAA2/RORC/SHH/SIRT1/SMPD1/SNAI1/SNAI2/SOD1/SPP1/STAR/TNF	35
GO:0006913	BP	GO:0006913	nucleocytoplasmic transport	35/754	328/18614	1.83466e-07	6.48617e-07	2.30308e-07	AGT/AKT1/ANGPT1/ATXN1/AXIN1/BMP4/CDH1/CDKN1A/FGF9/GSK3B/HSP90AA1/IFI27/IFNG/IL1B/IL33/JAK2/LEP/MAPK14/MAVS/MMP12/NFKBIA/NUP62/PIK3R1/PRKCD/PTGS2/PTPN11/SHH/SMAD3/SQSTM1/SSB/STAT3/TGFB1/TP53/TXN/ZC3H12A	35
GO:0051169	BP	GO:0051169	nuclear transport	35/754	328/18614	1.83466e-07	6.48617e-07	2.30308e-07	AGT/AKT1/ANGPT1/ATXN1/AXIN1/BMP4/CDH1/CDKN1A/FGF9/GSK3B/HSP90AA1/IFI27/IFNG/IL1B/IL33/JAK2/LEP/MAPK14/MAVS/MMP12/NFKBIA/NUP62/PIK3R1/PRKCD/PTGS2/PTPN11/SHH/SMAD3/SQSTM1/SSB/STAT3/TGFB1/TP53/TXN/ZC3H12A	35
GO:0090575	CC	GO:0090575	RNA polymerase II transcription regulator complex	35/756	254/19518	7.01568e-11	1.46373e-09	1.0406e-09	ATF3/ATF4/ATF6/CEBPA/CEBPB/CREB1/CTNNB1/DDIT3/FOS/FOSL1/FOSL2/HIF1A/HLF/JUN/JUNB/LEF1/MAFB/MYB/MYC/NFE2L2/PPARG/RXRA/SMAD1/SMAD2/SMAD3/SMAD4/SMAD7/STAT1/STAT2/STAT3/STAT4/STAT5A/STAT6/XBP1/YAP1	35
GO:0004713	MF	GO:0004713	protein tyrosine kinase activity	35/751	137/18369	1.13625e-18	5.35373e-17	3.66554e-17	ABL1/ALK/AXL/BTK/CSF1R/EGFR/EPHB2/ERBB2/FGFR1/FGFR2/FLT1/FLT3/IGF1R/ITK/JAK1/JAK2/JAK3/KDR/KIT/LCK/MAP2K1/MAP2K6/MAP2K7/MERTK/MET/PDGFRA/PDGFRB/PRKCD/PTK2/PTK2B/RIPK2/SRC/TEK/TXK/TYK2	35
GO:0032757	BP	GO:0032757	positive regulation of interleukin-8 production	34/754	63/18614	5.47371e-31	1.39331e-29	4.94729e-30	ADIPOQ/CD14/CD2/CHI3L1/DDIT3/ELANE/F2R/F2RL1/F3/FCN1/HMGB1/HSPA1A/IL1B/IL6/LEP/LGALS9/MAVS/MYD88/NOD2/NOS2/PLA2G1B/PYCARD/RELA/SERPINE1/STAT3/TLR2/TLR3/TLR4/TLR5/TLR7/TLR8/TLR9/TNF/WNT5A	34
GO:0042093	BP	GO:0042093	T-helper cell differentiation	34/754	69/18614	3.21078e-29	7.30909e-28	2.59528e-28	ANXA1/CCL19/CD80/CD86/FOXP3/GATA3/HLA-DRA/HLA-DRB1/HMGB1/IL12B/IL18/IL2/IL21/IL23A/IL27/IL4/IL4R/IL6/IL6R/IRF4/JAK3/JUNB/LEF1/MIR21/MTOR/MYB/NLRP3/RIPK2/RORC/SMAD7/STAT3/STAT6/TBX21/ZC3H12A	34
GO:1901216	BP	GO:1901216	positive regulation of neuron death	34/754	92/18614	4.24146e-24	6.98594e-23	2.48053e-23	ABL1/ATF4/BAX/C1QA/CASP3/CASP8/CASP9/CCL3/CTNNB1/DDIT3/DKK1/EFNB2/EGR1/FASLG/FCGR2B/FOS/FOXO3/GSK3A/GSK3B/IFNG/ITGA1/ITGAM/ITGB2/MAP2K7/MCL1/NR3C1/PARP1/RHOA/SNCA/TGFB2/TLR4/TNF/TP53/WNT5A	34
GO:0014909	BP	GO:0014909	smooth muscle cell migration	34/754	97/18614	3.20932e-23	5.02017e-22	1.78254e-22	ACE/ADIPOQ/AGT/AIF1/BCL2/BMP4/CCL5/CCN4/DDIT3/FGF9/GNA13/HAS2/IGF1/IGFBP3/IGFBP5/ITGB3/LPAR1/LRP1/MIR146A/MIR21/MIR34A/NFE2L2/PDGFA/PDGFB/PDGFRB/PLAT/PLAU/RHOA/S1PR2/SERPINE1/SRC/TERT/TLR4/VTN	34
GO:0001776	BP	GO:0001776	leukocyte homeostasis	34/754	103/18614	3.03989e-22	4.53957e-21	1.61189e-21	ABL1/ADAM17/AKT1/ANXA1/AXL/BAX/BCL2/BTK/CASP3/CSF1/CXCL6/CXCR2/F2R/FAS/FLT3/FOXP3/HIF1A/HMGB1/IL2/IL2RA/IL6/IL7R/JAK3/KITLG/LGALS9/MERTK/MIF/P2RX7/PIK3CD/RIPK3/TCIRG1/TNFAIP3/TNFSF13B/TNFSF14	34
GO:0032479	BP	GO:0032479	regulation of type I interferon production	34/754	104/18614	4.34619e-22	6.40491e-21	2.27422e-21	ATG5/CD14/CHUK/GAPDH/HSP90AA1/IFIH1/IL10/IRF1/IRF3/IRF5/IRF7/IRF8/ISG15/MAVS/MIR21/MMP12/MYD88/PTPN11/PYCARD/RIPK2/SIRPA/STAT1/STING1/TBK1/TICAM1/TLR2/TLR3/TLR4/TLR7/TLR8/TLR9/TRAF3/TRIM21/YY1	34
GO:0032606	BP	GO:0032606	type I interferon production	34/754	104/18614	4.34619e-22	6.40491e-21	2.27422e-21	ATG5/CD14/CHUK/GAPDH/HSP90AA1/IFIH1/IL10/IRF1/IRF3/IRF5/IRF7/IRF8/ISG15/MAVS/MIR21/MMP12/MYD88/PTPN11/PYCARD/RIPK2/SIRPA/STAT1/STING1/TBK1/TICAM1/TLR2/TLR3/TLR4/TLR7/TLR8/TLR9/TRAF3/TRIM21/YY1	34
GO:0046425	BP	GO:0046425	regulation of receptor signaling pathway via JAK-STAT	34/754	105/18614	6.18521e-22	8.99666e-21	3.19449e-21	AGT/CAV1/CCL5/EGF/EPHB2/F2/F2R/IFNA1/IFNA2/IFNB1/IFNG/IL10/IL10RA/IL12B/IL23A/IL24/IL4/IL5/IL6/IL6R/IL7R/IL9/JAK2/JAK3/KIT/LEP/LIF/MIR146A/PTK2B/PTPRC/SOCS1/SOCS3/TNF/TYK2	34
GO:1904035	BP	GO:1904035	regulation of epithelial cell apoptotic process	34/754	109/18614	2.42774e-21	3.39036e-20	1.20383e-20	ABL1/ADAR/ANGPT1/BAX/BCL2/CCL2/CD40/CD40LG/CDH5/CFLAR/ESR1/FASLG/FGB/GATA3/HMOX1/ICAM1/IGF1R/IL13/IL4/IL6/JAK2/KDR/MIR126/NFE2L2/PDX1/PLA2G1B/PPARA/SERPINE1/TEK/TERT/THBS1/TNF/TNFAIP3/YAP1	34
GO:0001704	BP	GO:0001704	formation of primary germ layer	34/754	127/18614	5.43996e-19	6.1864e-18	2.19664e-18	AXIN1/BMP4/BMP7/BMPR2/CTNNB1/DKK1/DUSP1/FGFR2/FN1/GATA6/HMGA2/ITGAV/ITGB1/ITGB2/ITGB3/KDM6B/KLF4/LEF1/MAP2K1/MIR145/MIR200C/MMP14/MMP2/MMP8/MMP9/SMAD1/SMAD2/SMAD3/SNAI1/SOX2/SRF/VTN/WNT3A/WNT5A	34
GO:0071456	BP	GO:0071456	cellular response to hypoxia	34/754	149/18614	1.16765e-16	1.11775e-15	3.96885e-16	ANGPT4/BCL2/BMP7/CD34/CFLAR/CYBB/EDN1/EGR1/FOS/GATA6/HIF1A/HMOX1/KCNMB1/MALAT1/MDM2/MIR126/MIR145/MIR146A/MIR21/MIR34A/MTOR/MYC/NFE2L2/PINK1/PPARG/PTGS2/SIRT1/SRC/TERC/TERT/TP53/TREM2/TWIST1/VEGFA	34
GO:0009411	BP	GO:0009411	response to UV	34/754	154/18614	3.41747e-16	3.14767e-15	1.11766e-15	AKT1/ATF4/BAX/BCL2/CASP3/CASP7/CASP9/CAT/CCND1/CDKN1A/CREBBP/EGFR/ELANE/EP300/IL12B/MAP2K7/MAPK14/MAPK8/MMP1/MMP2/MMP3/MMP9/MYC/NLRP1/PARP1/PIK3R1/PRKCD/PTGS2/RELA/SIRT1/SMPD1/TIMP1/TP53/YY1	34
GO:0043524	BP	GO:0043524	negative regulation of neuron apoptotic process	34/754	155/18614	4.21265e-16	3.81112e-15	1.35323e-15	ADORA2A/ANGPT1/APOE/AXL/BAX/BCL2/BCL2L1/CCL2/CCND1/CEBPB/CX3CL1/CX3CR1/F2R/HIF1A/HMOX1/IL10/IL6ST/JAK2/JUN/KDR/KRAS/LGMN/MECP2/NGF/PINK1/PPARGC1A/PTK2B/RHOA/ROCK1/SNCA/SOD1/SOD2/TERT/TGFB3	34
GO:0050792	BP	GO:0050792	regulation of viral process	34/754	165/18614	3.10353e-15	2.59013e-14	9.1969e-15	ADAR/AICDA/APCS/ATG5/AXL/BCL2/CCL5/CD209/CD28/CD4/CXCL8/CXCR4/FCN1/FURIN/HLA-DRB1/HMGA2/HMGB1/IFIH1/IFNA2/IFNB1/ISG15/LAMP3/LGALS1/LGALS9/MAVS/MX1/PPARA/PTX3/SMPD1/STAT1/TMPRSS2/TNF/TRIM21/TSG101	34
GO:0001659	BP	GO:0001659	temperature homeostasis	34/754	179/18614	3.92411e-14	3.04363e-13	1.08072e-13	ADAM17/ADIPOQ/APC/ATF4/CAV1/CCR2/CEBPB/CXCR4/DDIT3/EGR1/FABP4/IGF1R/IL13/IL15/IL18/IL1A/IL1B/IL4/IL4R/IRF4/JAK2/KDM6B/LCN2/LEP/MAP2K6/PPARGC1A/PTGS2/SQSTM1/STAT3/STAT6/TLR4/TNF/TNFSF11/VEGFA	34
GO:0006109	BP	GO:0006109	regulation of carbohydrate metabolic process	34/754	183/18614	7.71432e-14	5.82998e-13	2.07008e-13	ADIPOQ/AKT1/AKT2/APP/EGF/EP300/GPT/GSK3A/GSK3B/HAS2/HIF1A/IFNG/IGF1/IGF2/IGFBP3/INS/LEP/MTOR/NFKB1/NR3C1/P2RX7/PDGFB/PPARA/PPARGC1A/PRKAA2/PTH/PTK2B/RORC/SIRT1/SNCA/SRC/STAT3/TGFB1/TP53	34
GO:0050851	BP	GO:0050851	antigen receptor-mediated signaling pathway	34/754	201/18614	1.28014e-12	8.62667e-12	3.06312e-12	ABL1/BAX/BCAR1/BCL2/BTK/CCR7/CD19/CD28/CD38/CD79A/CD8A/CTLA4/FCGR2B/FOXP3/GATA3/HLA-DRB1/IGHE/ITK/LCK/LGALS3/MAP3K7/MAPK1/MIR34A/MS4A1/NFKB1/NFKBIA/PIK3CD/PTPRC/RELA/RIPK2/THY1/TRAF6/TXK/ZC3H12A	34
GO:0097553	BP	GO:0097553	calcium ion transmembrane import into cytosol	34/754	201/18614	1.28014e-12	8.62667e-12	3.06312e-12	ABL1/ATG5/BAX/BCL2/CAV1/CCL19/CCL21/CCL3/CCN2/CCR5/CCR7/CD19/CX3CL1/CXCL10/CXCL11/CXCL9/DDIT3/EPO/F2/F2R/FASLG/FGF2/IL13/ITGB3/LCK/MIR200C/MS4A1/P2RX7/PLA2G1B/PTK2B/PTPRC/SNCA/THY1/UBASH3B	34
GO:0002377	BP	GO:0002377	immunoglobulin production	34/754	212/18614	6.03864e-12	3.78259e-11	1.34311e-11	AICDA/B2M/BTK/CCR6/CD28/CD40/CD40LG/CD86/EPHB2/FCGR2B/FOXP3/HLA-DRA/HLA-DRB1/IL10/IL13/IL13RA2/IL2/IL21/IL33/IL4/IL4R/IL5/IL6/MZB1/PTPRC/STAT6/TBX21/TFRC/TGFB1/TLR9/TNF/TRAF6/XBP1/YY1	34
GO:0009636	BP	GO:0009636	response to toxic substance	34/754	242/18614	2.46874e-10	1.28485e-09	4.56217e-10	ABCB6/AHR/ALB/APOE/ARG1/ATF4/BAX/BCL2/BMP7/CAT/CCL3/CCL4/CCL5/CDH1/FOS/GATA6/MIR21/MIR326/MPO/NFE2L2/NOS3/PDGFRB/PINK1/PTGS1/PTGS2/S100A9/SDC1/SOD1/SOD2/SOD3/SRF/TLR2/TNF/TXN	34
GO:0031330	BP	GO:0031330	negative regulation of cellular catabolic process	34/754	251/18614	6.62334e-10	3.26215e-09	1.15831e-09	AKT1/AXIN2/BCL2/BECN1/CST3/FURIN/GSK3A/HGF/HMOX1/IL10/IL10RA/INS/LEP/MAPK14/MAPKAPK2/MCL1/MET/MIR146A/MIR21/MTOR/MYD88/PIK3CG/PINK1/ROCK1/SHH/SNCA/STAT3/TIMP1/TIMP2/TIMP3/TIMP4/TP53/TREM2/WNT1	34
GO:0048562	BP	GO:0048562	embryonic organ morphogenesis	34/754	294/18614	3.91475e-08	1.49235e-07	5.29896e-08	BMP4/BMP7/CTNNB1/EDN1/EDNRA/ENG/EPHB2/FGF10/FGF9/FGFR2/FZD3/GATA3/GLI1/HIF1A/MAFB/MAPK1/MAPK3/MMP14/PDGFRA/SHH/SMAD2/SMAD3/SOD1/SOX9/SRF/TGFB3/TGFBR1/TGFBR2/TWIST1/WNT1/WNT3A/WNT5A/YAP1/ZEB1	34
GO:0015711	BP	GO:0015711	organic anion transport	34/754	433/18614	0.000188663	0.000435856	0.000154762	ACE/ACE2/ADORA2A/AGT/AKT1/AKT2/ANXA1/APOE/ARG1/CD47/CFTR/EDN1/FABP4/FOLR2/IL1A/IL1B/ITGB1/LEP/MAP2K6/MIF/NOS2/P2RX7/PLA2G1B/PLA2G4A/PPARA/PPARG/PTGS2/SLC17A5/SLC2A1/SNCA/THBS1/TNF/TNFSF11/XK	34
GO:0042391	BP	GO:0042391	regulation of membrane potential	34/754	433/18614	0.000188663	0.000435856	0.000154762	ABL1/ADORA2A/AKT1/AKT2/APP/BAX/BCL2/BCL2L1/BID/CAV1/CFTR/EDN1/GSK3A/GSK3B/KCNMB2/KDR/MECP2/MIR29B1/MTOR/MYH14/P2RX7/PARP1/PINK1/PTEN/PTK2B/S1PR2/SMAD7/SNCA/SOD1/SOD2/SRC/TNF/TREM2/WNT7A	34
GO:0004896	MF	GO:0004896	cytokine receptor activity	34/751	92/18369	5.67691e-24	3.248e-22	2.22381e-22	CCR1/CCR2/CCR3/CCR4/CCR5/CCR6/CCR7/CCR8/CD4/CD44/CSF2RB/CX3CR1/CXCR1/CXCR2/CXCR3/CXCR4/CXCR5/FLT3/IFNAR1/IL10RA/IL12B/IL13RA1/IL13RA2/IL17RA/IL1R1/IL1R2/IL1RL1/IL2RA/IL2RB/IL3RA/IL4R/IL6R/IL6ST/IL7R	34
GO:0019902	MF	GO:0019902	phosphatase binding	34/751	187/18369	1.9231e-13	4.81377e-12	3.29584e-12	BCL2/CDH2/CDH5/CSF1R/CTNNB1/EGFR/EIF2AK3/ERBB2/HSP90AA1/ITGA1/JAK1/JAK3/LCK/LGALS3/MAP2K7/MAPK1/MAPK14/MAPK3/MAPK8/MET/PIK3R1/PPARA/PTK2/SIRPA/SMAD2/SMAD3/SOD1/SPHK1/STAT1/STAT3/STAT6/TBK1/TP53/TRAF3	34
GO:2000630	BP	GO:2000630	positive regulation of miRNA metabolic process	33/754	60/18614	1.76414e-30	4.37131e-29	1.55214e-29	AR/BMP2/EGFR/EGR1/FGF2/FOS/FOSL1/FOXO3/GATA3/HIF1A/IL10/JUN/KLF4/MRTFA/MYB/MYC/NFKB1/NR3C1/PDGFB/PPARG/RELA/SMAD1/SMAD3/SMAD4/SPI1/SRF/STAT3/TERT/TGFB1/TGFB2/TNF/TP53/ZC3H12A	33
GO:0032615	BP	GO:0032615	interleukin-12 production	33/754	64/18614	3.05501e-29	6.98288e-28	2.47945e-28	AGER/CCL19/CCR7/CD40/CD40LG/CD47/HMGB1/IDO1/IFNG/IL10/IL12B/IL17A/IL23A/IRAK3/IRF1/IRF5/IRF8/JAK3/LEP/LGALS9/MAPK14/MIR21/NFKB1/NOD2/RELA/RIPK2/THBS1/TLR2/TLR3/TLR4/TLR8/TLR9/TRAF6	33
GO:0032655	BP	GO:0032655	regulation of interleukin-12 production	33/754	64/18614	3.05501e-29	6.98288e-28	2.47945e-28	AGER/CCL19/CCR7/CD40/CD40LG/CD47/HMGB1/IDO1/IFNG/IL10/IL12B/IL17A/IL23A/IRAK3/IRF1/IRF5/IRF8/JAK3/LEP/LGALS9/MAPK14/MIR21/NFKB1/NOD2/RELA/RIPK2/THBS1/TLR2/TLR3/TLR4/TLR8/TLR9/TRAF6	33
GO:0032613	BP	GO:0032613	interleukin-10 production	33/754	66/18614	1.14933e-28	2.53395e-27	8.99741e-28	AGER/BTK/CD274/CD28/CD34/CD40LG/CD47/F2RL1/FCGR2B/FOXP3/HGF/HLA-DRB1/HMGB1/IDO1/IL12B/IL13/IL23A/IL4/IL6/IRF4/ISG15/JAK3/LGALS9/MIR145/MMP8/NOD2/PYCARD/STAT3/TLR2/TLR4/TLR9/TREM2/TSLP	33
GO:0032653	BP	GO:0032653	regulation of interleukin-10 production	33/754	66/18614	1.14933e-28	2.53395e-27	8.99741e-28	AGER/BTK/CD274/CD28/CD34/CD40LG/CD47/F2RL1/FCGR2B/FOXP3/HGF/HLA-DRB1/HMGB1/IDO1/IL12B/IL13/IL23A/IL4/IL6/IRF4/ISG15/JAK3/LGALS9/MIR145/MMP8/NOD2/PYCARD/STAT3/TLR2/TLR4/TLR9/TREM2/TSLP	33
GO:2000514	BP	GO:2000514	regulation of CD4-positive, alpha-beta T cell activation	33/754	77/18614	6.5623e-26	1.22906e-24	4.36409e-25	AGER/ANXA1/CCL19/CD274/CD28/CD80/CD86/FOXP3/GATA3/HLA-DRA/HLA-DRB1/HMGB1/IFNG/IL12B/IL18/IL2/IL23A/IL27/IL2RA/IL4/IL4R/IRF4/JAK3/JUNB/LGALS9/MIR21/NLRP3/RIPK2/SMAD7/SOCS1/TBX21/TGFBR2/ZC3H12A	33
GO:0046330	BP	GO:0046330	positive regulation of JNK cascade	33/754	95/18614	1.97506e-22	2.98929e-21	1.06142e-21	AGER/APP/AXIN1/CCL19/CCL21/CCN2/CCR7/CD27/F2RL1/FCGR2B/HMGB1/IL1A/IL1B/LTBR/MAP2K7/MMP8/MYD88/NOD2/NOX1/PTK2B/PYCARD/RIPK2/TLR3/TLR4/TLR9/TNF/TNFSF11/TRAF3/TRAF6/WNT5A/WNT7A/WNT7B/XIAP	33
GO:0002709	BP	GO:0002709	regulation of T cell mediated immunity	33/754	97/18614	4.22401e-22	6.2578e-21	2.22199e-21	AGER/AHR/ARG1/B2M/CCR2/CD1A/CD1C/FCGR2B/FOXP3/GATA3/HLA-DRA/HLA-DRB1/HMGB1/IFNA2/IFNB1/IL12B/IL18/IL1B/IL1R1/IL23A/IL4/IL6/IL7R/MAP3K7/NLRP3/NOD2/P2RX7/PTPRC/RIPK3/SMAD7/TBX21/TNFRSF1B/TRAF6	33
GO:0033138	BP	GO:0033138	positive regulation of peptidyl-serine phosphorylation	33/754	108/18614	1.94936e-20	2.52694e-19	8.97255e-20	AKT1/ANGPT1/APP/AXIN1/BCL2/CAV1/CD44/CSF3/EGFR/GSK3A/HSP90AA1/IFNA1/IFNA2/IFNB1/IFNG/IL11/IL6/LIF/MIF/NGF/OSM/PINK1/PTGS2/RIPK2/SNCA/TBK1/TFRC/TGFB1/TNF/TXN/VEGFA/WNT3A/WNT5A	33
GO:0031341	BP	GO:0031341	regulation of cell killing	33/754	110/18614	3.69847e-20	4.76125e-19	1.6906e-19	AGER/ARG1/B2M/BCL2L1/CD1A/CD1C/CX3CR1/CXCL6/F2RL1/FCER2/FCGR2B/HLA-DRA/HLA-DRB1/ICAM1/IFNG/IL12B/IL13/IL21/IL23A/IL4/IL7R/ITGAM/KLRB1/LAMP1/LEP/LGALS9/MAPK8/NOS2/P2RX7/PTPRC/RIPK3/SPI1/TGFB1	33
GO:1903707	BP	GO:1903707	negative regulation of hemopoiesis	33/754	115/18614	1.71661e-19	2.05406e-18	7.29347e-19	ADIPOQ/ANXA1/APCS/BMP4/CCL3/CEBPA/CTLA4/CTNNB1/ERBB2/FCGR2B/FOXJ1/FOXP3/HMGB1/IFNA2/IFNB1/IL2/IL4/IL4R/IRF1/JAK3/MAFB/MIR21/MYC/PIK3R1/SHH/SMAD7/SNAI2/SOCS1/TBX21/TLR3/TLR4/UBASH3B/ZC3H12A	33
GO:0045582	BP	GO:0045582	positive regulation of T cell differentiation	33/754	116/18614	2.30865e-19	2.73329e-18	9.70522e-19	ACTB/ANXA1/CCL19/CD27/CD80/CD86/FOXO3/FOXP3/GATA3/GLI2/HLA-DRA/HLA-DRB1/IFNG/IL12B/IL18/IL2/IL23A/IL2RA/IL4/IL4R/IL7/IL7R/LEF1/LGALS9/MIR21/NLRP3/PTPRC/RHOA/RIPK2/SHH/SOCS1/TGFBR2/XBP1	33
GO:0051702	BP	GO:0051702	biological process involved in interaction with symbiont	33/754	118/18614	4.13372e-19	4.77296e-18	1.69476e-18	APCS/APOE/ARG1/CAMP/CCL3/CCL4/CCL5/CCL8/CDC42/CFHR1/CSF1R/CX3CR1/CXCL6/ELANE/EP300/F2/F2RL1/FASN/FN1/GAPDH/HMGA2/IFI27/JAK2/JUN/LEF1/MYD88/PF4/PLG/PTX3/SFTPD/SPRR2A/TREM1/ZC3H12A	33
GO:0043280	BP	GO:0043280	positive regulation of cysteine-type endopeptidase activity involved in apoptotic process	33/754	124/18614	2.19888e-18	2.40974e-17	8.55638e-18	BAX/BBC3/BID/CASP1/CASP8/CASP9/CCN2/CTSD/CYCS/EIF2AK3/F2R/F3/FAS/FASLG/HMGB1/JAK2/LCK/LGALS9/MYC/NLRC4/NLRP1/NLRP3/PPARG/PYCARD/RHOA/S100A8/S100A9/SIRT1/SMAD3/SNCA/TNF/TNFSF10/WNT3A	33
GO:0007219	BP	GO:0007219	Notch signaling pathway	33/754	179/18614	2.26234e-13	1.64107e-12	5.82704e-13	ADAM10/ADAM17/AKT1/ANGPT4/APP/BMP2/BMP7/CEBPA/DNER/FGF10/IL17A/IL2RA/IL6ST/KIT/KRT19/MECP2/MIR126/MMP14/NFKBIA/NOD2/NOS3/POSTN/SNAI1/SNAI2/SOX9/SRC/STAT3/TGFB2/TGFBR2/TIMP4/TP63/WNT1/YAP1	33
GO:0046890	BP	GO:0046890	regulation of lipid biosynthetic process	33/754	182/18614	3.68731e-13	2.60719e-12	9.25748e-13	ABCA3/ADM/AKT1/ANXA1/APOE/BMP2/C3/CREB1/EGR1/FGF1/IFNG/IGF1R/IL1A/IL1B/INS/LEP/MIR29B1/MTOR/NFKB1/NR3C1/PDGFA/PDGFB/PPARA/PRKCD/PTGS2/SIRT1/SIRT3/SNAI1/SNAI2/SOD1/SPHK1/STAR/TNF	33
GO:0031032	BP	GO:0031032	actomyosin structure organization	33/754	202/18614	7.37654e-12	4.58475e-11	1.62793e-11	ABL1/ACTA1/APOA1/CCN2/CD47/CDC42/CFLAR/EDN1/ELN/ITGB1/KRT19/KRT8/LPAR1/MET/MIR21/MTOR/MYH14/PDGFRA/PDGFRB/PIK3R1/PTK2B/RAC1/RHOA/ROCK1/S1PR1/SDC4/SMAD3/SMAD4/SRC/SRF/TGFB3/TGFBR1/TJP1	33
GO:0034284	BP	GO:0034284	response to monosaccharide	33/754	207/18614	1.46383e-11	8.79552e-11	3.12307e-11	ACE/ADIPOQ/AGER/ANGPT2/CASP3/CAT/CCN2/CFTR/CMA1/EGR1/ERN1/HIF1A/HLA-DRB1/IGF1R/IL1A/LEP/LRP5/MIR146A/NOX4/PDX1/PRKAA2/PTGS2/PTK2B/RHOA/SMAD2/SMAD4/SOD2/SRF/TGFBR2/THBS1/TNF/TREM2/XBP1	33
GO:0032869	BP	GO:0032869	cellular response to insulin stimulus	33/754	211/18614	2.49142e-11	1.46247e-10	5.19286e-11	ADIPOQ/AGT/AKT1/AKT2/APC/BCAR1/CFLAR/CTSD/GPT/GSK3A/GSK3B/HDAC9/IGF1R/IGF2/IGFBP1/IL1B/INS/LEP/MAPK1/MAPK3/MZB1/PARP1/PIK3R1/PLA2G1B/PPARG/PRKCD/PTPN11/SIRT1/SOCS1/SOCS3/SRC/STAT1/XBP1	33
GO:0060047	BP	GO:0060047	heart contraction	33/754	247/18614	1.69109e-09	7.82651e-09	2.779e-09	ACE/ACE2/ADM/AGT/AGTR2/ATG5/CALCA/CAV1/CCN2/CDC42/CXCR4/DES/EDN1/EDNRA/GATA6/GSK3A/HBEGF/HSP90AA1/IL2/JAK2/MAP2K6/MDM2/MIR200C/MTOR/NOS3/PIK3CG/S100A1/SMAD7/SOD1/TAFAZZIN/TGFB2/TNF/ZC3H12A	33
GO:0042593	BP	GO:0042593	glucose homeostasis	33/754	248/18614	1.87706e-09	8.67289e-09	3.07953e-09	ACE/ADIPOQ/AGER/AKT1/ALOX5/CCN4/CEBPA/CFTR/CMA1/ERN1/HIF1A/HLA-DRB1/IGF1R/IGFBP5/IL6/INS/LEP/LRP5/MCU/MIR146A/NOX4/PDX1/PIK3R1/PPARG/PPARGC1A/PRKAA2/PTPN11/SIRT1/SMAD4/SRF/STAT3/TREM2/XBP1	33
GO:0033500	BP	GO:0033500	carbohydrate homeostasis	33/754	249/18614	2.08221e-09	9.55766e-09	3.39369e-09	ACE/ADIPOQ/AGER/AKT1/ALOX5/CCN4/CEBPA/CFTR/CMA1/ERN1/HIF1A/HLA-DRB1/IGF1R/IGFBP5/IL6/INS/LEP/LRP5/MCU/MIR146A/NOX4/PDX1/PIK3R1/PPARG/PPARGC1A/PRKAA2/PTPN11/SIRT1/SMAD4/SRF/STAT3/TREM2/XBP1	33
GO:0043547	BP	GO:0043547	positive regulation of GTPase activity	33/754	272/18614	1.93056e-08	7.70022e-08	2.73416e-08	AKT2/CCL1/CCL11/CCL13/CCL17/CCL18/CCL19/CCL2/CCL20/CCL21/CCL22/CCL24/CCL26/CCL3/CCL4/CCL5/CCL7/CCL8/CCR7/CD40/CX3CL1/CXCL13/ERBB2/F2R/F2RL1/FOXJ1/GSK3B/ITGB1/PRTN3/PTK2B/S1PR1/THY1/WNT5A	33
GO:0007611	BP	GO:0007611	learning or memory	33/754	276/18614	2.76312e-08	1.08206e-07	3.84213e-08	ABL1/AGER/AGT/APOE/APP/ATXN1/B2M/CASP3/CCL11/CEBPB/CREB1/CX3CR1/DKK1/EGFR/EP300/EPHB2/FOS/FOSL1/HIF1A/ITGB1/KIT/KRAS/LGMN/MAPK1/MECP2/NGF/PTEN/PTGS2/S100B/SRC/SRF/TLR2/TREM2	33
GO:0006936	BP	GO:0006936	muscle contraction	33/754	349/18614	5.93703e-06	1.70063e-05	6.03852e-06	ACE2/ACTA1/ADORA2B/AGT/CALCA/CAV1/CCN2/CD38/CXCR4/DES/EDN1/EDNRA/F2R/HSP90AA1/KIT/LTB4R/MAP2K6/MIR145/MIR200C/MIR21/MTOR/MYH14/PIK3CG/PTGS2/RHOA/ROCK1/SMAD7/SOD1/SPHK1/SRF/TAFAZZIN/TNF/ZC3H12A	33
GO:0016570	BP	GO:0016570	histone modification	33/754	475/18614	0.00190436	0.00370936	0.0013171	ACTB/ATG5/CREBBP/CTNNB1/EP300/FOXP3/GATA3/HDAC9/IGF2/IRF4/JAK2/KDM6B/LEF1/LIF/MAP3K7/MBD2/MECP2/MUC1/MYD88/PADI4/PINK1/PPARGC1A/PRKAA2/SIRT1/SIRT3/SMAD4/SNAI2/SNCA/SPI1/TP53/TRIM37/TWIST1/VEGFA	33
GO:0048285	BP	GO:0048285	organelle fission	33/754	497/18614	0.00385981	0.00716439	0.0025439	APC/BECN1/BMP4/BMP7/CD28/CDC42/DUSP1/EDN1/EGF/EREG/HSPA1A/IGF1/IGF2/IL1A/IL1B/INS/KDR/LIF/LRP5/MCU/MKI67/NUP62/PDGFB/PDGFRB/PINK1/PPARG/RHOA/SPHK1/STAT2/TGFA/TNF/WAPL/WNT5A	33
GO:0005774	CC	GO:0005774	vacuolar membrane	33/756	460/19518	0.000532972	0.0029863	0.00212304	ABCA3/ABCB6/ANPEP/CD63/CD68/CEACAM8/CFTR/CTSD/DPP4/ECE1/EGF/FPR1/HLA-DRA/HLA-DRB1/HPS4/LAMP1/LRP1/MAP1LC3A/MAP1LC3B/MARCHF8/MTOR/NEU1/OCLN/SLC17A5/STING1/SYT7/TCIRG1/TFEB/THBD/TLR3/TLR7/TLR8/TLR9	33
GO:0008009	MF	GO:0008009	chemokine activity	33/751	49/18369	1.37869e-34	2.76082e-32	1.89025e-32	CCL1/CCL11/CCL13/CCL17/CCL18/CCL19/CCL2/CCL20/CCL21/CCL22/CCL24/CCL26/CCL3/CCL4/CCL5/CCL7/CCL8/CX3CL1/CXCL1/CXCL10/CXCL11/CXCL12/CXCL13/CXCL14/CXCL16/CXCL2/CXCL3/CXCL5/CXCL6/CXCL8/CXCL9/PF4/PPBP	33
GO:0042277	MF	GO:0042277	peptide binding	33/751	317/18369	8.81857e-07	8.82791e-06	6.04421e-06	AGER/ANPEP/APOA1/APOE/C1QA/CD1A/CD1C/CD209/CMA1/CST3/ECE1/EPHB2/FCGR2B/FURIN/HLA-DRA/HLA-DRB1/IGF1R/ITGAM/ITGB2/LRP1/MARCO/MSR1/NFKBIA/NOD2/PIK3R1/PPARG/PTGDR2/RELA/RXRA/TGFB2/TLR2/TLR4/TREM2	33
GO:0098586	BP	GO:0098586	cellular response to virus	32/754	85/18614	4.75551e-23	7.31617e-22	2.59779e-22	ADAR/BAX/CCL19/CCL5/CHUK/CXCL10/HIF1A/HSP90AA1/IFIH1/IFNA1/IFNA2/IFNAR1/IFNB1/IFNG/IL21/IL6/IRF3/JAK1/JAK2/LGALS9/MAPK14/MIR146A/MIR21/MIR29B1/MMP12/NFKB1/NLRP3/SMAD3/TLR3/TLR7/TYK2/ZC3H12A	32
GO:0014910	BP	GO:0014910	regulation of smooth muscle cell migration	32/754	90/18614	3.76376e-22	5.59073e-21	1.98513e-21	ACE/ADIPOQ/AGT/AIF1/BCL2/BMP4/CCL5/CCN4/FGF9/GNA13/HAS2/IGF1/IGFBP3/IGFBP5/ITGB3/LPAR1/LRP1/MIR146A/MIR21/MIR34A/NFE2L2/PDGFA/PDGFB/PDGFRB/PLAU/RHOA/S1PR2/SERPINE1/SRC/TERT/TLR4/VTN	32
GO:0010717	BP	GO:0010717	regulation of epithelial to mesenchymal transition	32/754	110/18614	3.87147e-19	4.47939e-18	1.59052e-18	AXIN2/BMP2/BMP4/BMP7/COL1A1/CTNNB1/ENG/GATA3/GREM1/IL1B/IL6/LEF1/LOXL2/MIR145/MIR21/MIR29B1/MTOR/NKX2-1/PDPN/PTEN/PTK2/SMAD2/SMAD3/SMAD4/SMAD7/SNAI1/TGFB1/TGFB2/TGFB3/TGFBR1/TGFBR2/TWIST1	32
GO:0001952	BP	GO:0001952	regulation of cell-matrix adhesion	32/754	125/18614	2.52372e-17	2.55105e-16	9.05815e-17	ABL1/ACVRL1/BCL2/CCL21/CCR7/CDKN2A/CSF1/CX3CL1/FUT1/GREM1/GSK3B/ITGB3/KDR/MIR29C/MMP12/MMP14/PIK3R1/PLAU/PTEN/PTK2/PTK2B/RAC1/RHOA/ROCK1/SDC4/SERPINE1/SMAD3/SRC/TEK/THBS1/THY1/VEGFA	32
GO:0019730	BP	GO:0019730	antimicrobial humoral response	32/754	126/18614	3.25526e-17	3.26693e-16	1.16e-16	CAMP/CCL13/CXCL1/CXCL10/CXCL11/CXCL13/CXCL14/CXCL2/CXCL3/CXCL5/CXCL6/CXCL8/CXCL9/ELANE/F2/FGB/GAPDH/GATA6/IL17A/IL17F/LYZ/NOD2/PF4/PLA2G1B/PPBP/PRTN3/RNASE3/S100A12/S100A9/SFTPD/SPRR2A/TF	32
GO:2000027	BP	GO:2000027	regulation of animal organ morphogenesis	32/754	129/18614	6.87586e-17	6.69649e-16	2.37776e-16	ABL1/AGT/AGTR2/AR/BMP2/BMP4/BMP7/CD34/CDC42/CSF1/CTNNB1/DKK1/EDN1/FGF1/FGF10/FGF2/FGF7/FZD3/GATA3/GREM1/HGF/PDGFA/RAC1/RHOA/SHH/SNAI2/SOX9/TNF/VEGFA/WNT3A/WNT5A/WNT7A	32
GO:0046661	BP	GO:0046661	male sex differentiation	32/754	168/18614	2.04876e-13	1.49001e-12	5.29064e-13	ACE/AR/ATN1/BAX/BCL2/BCL2L1/CCND1/CTNNB1/ESR1/FGF10/FGF9/GATA3/GATA6/IL1A/KIT/KITLG/MMP14/NKX2-1/PDGFA/PDGFRA/PDGFRB/REN/SDC1/SHH/SMAD4/SOX9/TGFB2/TGFBR1/TLR3/TLR9/TNFSF10/WNT5A	32
GO:0071478	BP	GO:0071478	cellular response to radiation	32/754	191/18614	7.6889e-12	4.7736e-11	1.69499e-11	AKT2/ATF4/BAX/BCL2L1/CASP9/CDKN1A/CREBBP/EGR1/EP300/GATA3/HSPA5/ITGB6/MAPK14/MDM2/MIR21/MMP1/MMP2/MMP3/MMP9/MYC/NLRP1/PARP1/PIK3R1/PRKCD/PTGS2/SIRT1/SMPD1/SNAI2/TIMP1/TP53/YAP1/YY1	32
GO:0016051	BP	GO:0016051	carbohydrate biosynthetic process	32/754	214/18614	1.64979e-10	8.77383e-10	3.11537e-10	ADIPOQ/AKT1/AKT2/ATF3/ATF4/B3GNT2/EGF/EP300/FUT1/FUT4/GPT/GSK3A/GSK3B/HAS1/HAS2/IGF1/IGF2/INS/ISYNA1/LEP/NFKB1/NR3C1/PARP1/PDGFB/PGM1/PPARA/PPARGC1A/PTH/PTK2B/SIRT1/SNCA/TGFB1	32
GO:0033157	BP	GO:0033157	regulation of intracellular protein transport	32/754	224/18614	5.43129e-10	2.68923e-09	9.54881e-10	ADIPOQ/AKT2/ANGPT1/BBC3/BMP4/CDH1/ERBB2/GSK3A/GSK3B/GZMB/HPS4/HSP90AA1/IFI27/IFNG/IL1B/ITGAM/ITGB2/JAK2/LEP/MAPK14/MAPK8/MAVS/PIK3R1/PINK1/PRKCD/PTGS2/PTPN11/SHH/SMAD3/TGFB1/TXN/ZC3H12A	32
GO:0005996	BP	GO:0005996	monosaccharide metabolic process	32/754	256/18614	1.54273e-08	6.27854e-08	2.22935e-08	ADIPOQ/AKT1/AKT2/ATF3/ATF4/EP300/FUT1/FUT4/GAPDH/GLB1/GPT/GSK3A/IGF1/IGF2/IGFBP3/INS/LEP/LRP5/MAPK14/NR3C1/PDX1/PFKFB3/PGM1/PPARA/PPARGC1A/PTH/RORC/SIRT1/SLC2A1/SRC/TNF/TP53	32
GO:0015833	BP	GO:0015833	peptide transport	32/754	259/18614	2.04524e-08	8.12869e-08	2.8863e-08	ALOX5/ANXA1/CA2/CCL5/CD209/CD38/CFTR/EDN1/F2/F2RL1/FGB/GRP/HIF1A/HLA-DRB1/IFNG/IL1B/IL1RN/IL6/INS/JAK2/LEP/LRP5/MCU/NOS2/PDX1/PTPN11/S100A8/SMAD2/SYT7/TCIRG1/TNF/TNFSF11	32
GO:0110053	BP	GO:0110053	regulation of actin filament organization	32/754	268/18614	4.63033e-08	1.76034e-07	6.25053e-08	ABL1/APOA1/CCL11/CCL21/CCL24/CCL26/CCN2/CCR7/CD47/CDC42/CSF3/CX3CL1/CXCL12/ELN/F2RL1/LPAR1/MET/MIR21/MTOR/PIK3R1/PRKCD/PTK2B/PYCARD/RAC1/RHOA/ROCK1/S1PR1/SDC4/SMAD3/TGFB3/TGFBR1/TJP1	32
GO:0015850	BP	GO:0015850	organic hydroxy compound transport	32/754	296/18614	4.58798e-07	1.53481e-06	5.44972e-07	ABCA3/ACTB/ADIPOQ/ADORA2A/AGT/AGTR1/APOA1/APOE/CAV1/CFTR/CXCL12/EGF/FURIN/ITGB3/LEP/LRP1/MECP2/MSR1/NFKB1/NFKBIA/PINK1/PPARG/PTPN11/REN/RXRA/SHH/SIRT1/SNCA/SPP1/STAR/SYT7/TREM2	32
GO:0032409	BP	GO:0032409	regulation of transporter activity	32/754	324/18614	3.29817e-06	9.82957e-06	3.49024e-06	ACE2/ACTB/ADIPOQ/APP/BCL2/CAV1/CCL2/CCR2/CFTR/EDN1/EDNRA/EPHB2/EPO/GRP/IFNG/INS/ITGB1/MIR200C/MIR29B1/MIR326/MIR34A/MMP9/PINK1/PPARG/PRKCD/PTK2B/RRAD/RXRA/SNCA/TLR9/TREM2/TWIST1	32
GO:0015980	BP	GO:0015980	energy derivation by oxidation of organic compounds	32/754	337/18614	7.5111e-06	2.12973e-05	7.56214e-06	AKT1/AKT2/BID/CAT/COX8A/CS/CYCS/GSK3A/GSK3B/HIF1A/IFNAR1/IFNG/IGF1/IGF2/IL4/IL6ST/INS/KL/LEP/MTOR/MYC/NOS2/PINK1/PPARGC1A/PTH/RHOA/SIRT3/SNCA/SOD2/TAFAZZIN/TNF/TP53	32
GO:0046942	BP	GO:0046942	carboxylic acid transport	32/754	352/18614	1.81978e-05	4.90411e-05	1.74133e-05	ACE/ACE2/ADORA2A/AGT/AKT1/AKT2/ANXA1/APOE/ARG1/EDN1/FABP4/FOLR2/IL1A/IL1B/ITGB1/LEP/MAP2K6/MIF/NOS2/P2RX7/PLA2G1B/PLA2G4A/PPARA/PPARG/PTGS2/SLC17A5/SLC2A1/SNCA/THBS1/TNF/TNFSF11/XK	32
GO:0015849	BP	GO:0015849	organic acid transport	32/754	353/18614	1.92589e-05	5.15781e-05	1.83141e-05	ACE/ACE2/ADORA2A/AGT/AKT1/AKT2/ANXA1/APOE/ARG1/EDN1/FABP4/FOLR2/IL1A/IL1B/ITGB1/LEP/MAP2K6/MIF/NOS2/P2RX7/PLA2G1B/PLA2G4A/PPARA/PPARG/PTGS2/SLC17A5/SLC2A1/SNCA/THBS1/TNF/TNFSF11/XK	32
GO:0005770	CC	GO:0005770	late endosome	32/756	296/19518	1.72164e-07	2.13576e-06	1.51837e-06	ABCA3/ABCB6/APOE/CD63/CD79A/CTSL/CXCR4/DDIT3/EGFR/F2R/HLA-DRA/HLA-DRB1/IFNAR1/IL12B/LAMP1/LGMN/MAP1LC3A/MAP2K1/MAPK1/MAPK3/MARCHF8/SFTPA1/SFTPA2/SFTPB/SFTPC/SFTPD/SIGLEC1/SQSTM1/SRC/TCIRG1/TF/TSG101	32
GO:0030135	CC	GO:0030135	coated vesicle	32/756	312/19518	5.65748e-07	5.77063e-06	4.1025e-06	ADAM10/APOE/APP/AREG/B2M/CD207/CD4/CD9/CFTR/CTLA4/ECE1/EDN1/EGF/EGFR/EREG/FCGR1A/FURIN/HBEGF/HLA-DRA/HLA-DRB1/IL7R/SERPINA1/SFTPA1/SFTPA2/SFTPB/SFTPC/SFTPD/TF/TFRC/TGFA/VWF/WNT5A	32
GO:1902895	BP	GO:1902895	positive regulation of miRNA transcription	31/754	51/18614	1.34451e-30	3.37635e-29	1.19886e-29	AR/BMP2/EGFR/EGR1/FGF2/FOS/FOSL1/FOXO3/GATA3/HIF1A/IL10/JUN/KLF4/MRTFA/MYB/MYC/NR3C1/PDGFB/PPARG/RELA/SMAD1/SMAD3/SMAD4/SPI1/SRF/STAT3/TERT/TGFB1/TGFB2/TNF/TP53	31
GO:0042531	BP	GO:0042531	positive regulation of tyrosine phosphorylation of STAT protein	31/754	67/18614	1.11789e-25	2.03915e-24	7.24051e-25	CCL5/CD40/CSF1R/CSF2/EPO/FLT3/IFNA2/IFNG/IGF1/IL12B/IL13/IL15/IL18/IL2/IL21/IL23A/IL24/IL3/IL4/IL6/IL6R/IL6ST/JAK2/KIT/LEP/LIF/OSM/PARP9/TNF/TNFRSF1A/TSLP	31
GO:0046637	BP	GO:0046637	regulation of alpha-beta T cell differentiation	31/754	73/18614	2.88049e-24	4.81515e-23	1.70974e-23	ANXA1/CCL19/CD80/CD86/FOXP3/GATA3/HLA-DRA/HLA-DRB1/HMGB1/IFNG/IL12B/IL18/IL2/IL23A/IL27/IL4/IL4R/IRF4/JAK3/JUNB/LGALS9/MIR21/NLRP3/RHOA/RIPK2/SHH/SMAD7/SOCS1/TBX21/TGFBR2/ZC3H12A	31
GO:0071260	BP	GO:0071260	cellular response to mechanical stimulus	31/754	73/18614	2.88049e-24	4.81515e-23	1.70974e-23	AGT/CASP1/CASP8/CD40/COL1A1/ENG/FAS/FGF2/IGF1R/IL13/IL1B/IL33/IRF1/ITGB3/LTBR/MAPK3/MAPK8/MYD88/NFKB1/PTGS2/SLC2A1/SOX9/TLR3/TLR4/TLR5/TLR7/TLR8/TNFRSF10B/TNFRSF1A/TNFRSF8/TNFSF14	31
GO:0032732	BP	GO:0032732	positive regulation of interleukin-1 production	31/754	74/18614	4.7702e-24	7.78808e-23	2.76535e-23	AGER/AIM2/APP/CASP1/CASP8/CCL19/CCL3/EGR1/F2RL1/GSDMD/HMGB1/HSPB1/IFNG/IL17A/IL6/JAK2/LGALS9/MYD88/NLRC4/NLRP1/NLRP3/NOD2/P2RX7/PYCARD/RIPK2/SMAD3/STAT3/TLR4/TLR8/TNF/WNT5A	31
GO:0045123	BP	GO:0045123	cellular extravasation	31/754	74/18614	4.7702e-24	7.78808e-23	2.76535e-23	AGER/CCL2/CCL21/CCR2/CD47/CX3CL1/CX3CR1/CXCL12/ELANE/FUT4/ICAM1/IL1R1/ITGA1/ITGAL/ITGB1/LEP/LYVE1/MIR146A/PECAM1/PIK3CD/PIK3CG/PRTN3/RIPK3/ROCK1/SELE/SELL/SELP/SIRPA/THY1/TNF/VCAM1	31
GO:0050871	BP	GO:0050871	positive regulation of B cell activation	31/754	83/18614	3.01535e-22	4.51496e-21	1.60315e-21	BCL2/BTK/CD27/CD28/CD38/CD40/CDKN1A/EPHB2/IL10/IL13/IL2/IL21/IL4/IL5/IL6/IL7/MIF/MMP14/NOD2/PTPRC/SPI1/STAT6/TBX21/TFRC/TGFB1/TICAM1/TLR4/TLR9/TNFSF13B/WNT3A/XBP1	31
GO:0034103	BP	GO:0034103	regulation of tissue remodeling	31/754	86/18614	1.04813e-21	1.51277e-20	5.37146e-21	AGT/CALCA/CD38/CSF1R/CST3/GREM1/IL12B/IL15/IL18/IL2/IL21/IL23A/IL6/ITGB3/LEP/MIR29B1/MIR34A/P2RX7/PPARG/ROCK1/S1PR1/SPP1/SRC/SYT7/TF/TFRC/TGFB1/TNFAIP3/TNFSF11/TP53/UBASH3B	31
GO:1990874	BP	GO:1990874	vascular associated smooth muscle cell proliferation	31/754	97/18614	6.35919e-20	7.87864e-19	2.79751e-19	ADIPOQ/AGT/BMP4/CDKN1A/DDIT3/EDN1/ERN1/FGF2/FGF9/GNA13/HMOX1/IGF1/IGFBP5/IL10/JAK2/JUN/MIR146A/MIR21/MIR34A/MMP2/MMP9/PDGFB/PPARG/PTEN/RHOA/S1PR2/SOD2/SRC/TERT/TGFB3/TNF	31
GO:0050764	BP	GO:0050764	regulation of phagocytosis	31/754	101/18614	2.42809e-19	2.86862e-18	1.01858e-18	ADIPOQ/APOA1/ATG5/BTK/C3/CCL2/CD47/F2RL1/FCGR1A/FCGR2B/FCN1/HMGB1/IFNG/IL15/IL1B/IL2RB/ITGAV/MERTK/NOD2/PRTN3/PTPRC/PTX3/PYCARD/SFTPD/SIRPA/SOD1/SPHK1/SYT7/TLR2/TNF/TREM2	31
GO:0030316	BP	GO:0030316	osteoclast differentiation	31/754	102/18614	3.35667e-19	3.9325e-18	1.39633e-18	BMP2/CCL3/CCN4/CCR1/CEBPB/CREB1/CSF1/CSF1R/CTNNB1/FOS/IFNG/IL12B/IL17A/IL23A/IL4/JUNB/MAFB/MAPK14/MTOR/PIK3R1/SRC/TCIRG1/TF/TFRC/TLR3/TLR4/TNF/TNFSF11/TRAF6/TREM2/UBASH3B	31
GO:0048144	BP	GO:0048144	fibroblast proliferation	31/754	103/18614	4.62078e-19	5.31342e-18	1.88666e-18	ABL1/AGT/BAX/CAV1/CDKN1A/COL3A1/CTNNB1/EGFR/EREG/ESR1/FGF10/FN1/FOSL2/IGF1/IL13/ITGB3/JUN/LIF/MIF/MYC/PDGFA/PDGFB/PDGFRA/PDGFRB/PLA2G1B/SOD2/SPHK1/TP53/WNT1/WNT5A/WNT7B	31
GO:1902106	BP	GO:1902106	negative regulation of leukocyte differentiation	31/754	109/18614	2.8925e-18	3.14525e-17	1.1168e-17	ADIPOQ/ANXA1/APCS/BMP4/CCL3/CTLA4/CTNNB1/ERBB2/FCGR2B/FOXJ1/FOXP3/HMGB1/IFNA2/IFNB1/IL2/IL4/IL4R/IRF1/JAK3/MAFB/MIR21/MYC/PIK3R1/SHH/SMAD7/SOCS1/TBX21/TLR3/TLR4/UBASH3B/ZC3H12A	31
GO:0007229	BP	GO:0007229	integrin-mediated signaling pathway	31/754	112/18614	6.88509e-18	7.23386e-17	2.56857e-17	ABL1/ADAM10/ANGPTL3/APOA1/BCAR1/CCN2/CD40LG/CD47/CD63/CDC42/COL3A1/FN1/ISG15/ITGA1/ITGAE/ITGAL/ITGAM/ITGAV/ITGAX/ITGB1/ITGB2/ITGB3/ITGB6/PTK2/PTK2B/PTPN11/SEMA7A/SRC/THY1/TIMP1/TXK	31
GO:1903900	BP	GO:1903900	regulation of viral life cycle	31/754	143/18614	1.19802e-14	9.58415e-14	3.40309e-14	ADAR/AICDA/APCS/AXL/BCL2/CCL5/CD209/CD28/CD4/CXCL8/FCN1/FURIN/HLA-DRB1/HMGA2/HMGB1/IFIH1/IFNA2/IFNB1/ISG15/LAMP3/LGALS1/LGALS9/MAVS/MX1/PPARA/PTX3/SMPD1/TMPRSS2/TNF/TRIM21/TSG101	31
GO:0055123	BP	GO:0055123	digestive system development	31/754	146/18614	2.19667e-14	1.73502e-13	6.16064e-14	BCL2/BMP4/COL3A1/CTNNB1/CXCL8/EGFR/FGF10/FGF9/FGFR2/GATA6/GLI1/GLI2/HIF1A/IGF2/IL6ST/KIT/MIR29B1/PDGFRA/PDX1/SHH/SMAD2/SMAD3/SOX9/SRC/TGFB2/TGFB3/TGFBR2/TNF/TP63/WNT5A/YAP1	31
GO:1903844	BP	GO:1903844	regulation of cellular response to transforming growth factor beta stimulus	31/754	151/18614	5.81889e-14	4.4577e-13	1.58282e-13	ADAM17/AXIN1/BMP2/CAV1/CFLAR/CREBBP/ENG/EP300/HSPA1A/HSPA5/IL17F/IL4/LOX/LTBP1/MIR21/MIR29B1/NKX2-1/PPARA/PPARG/SIRT1/SMAD2/SMAD3/SMAD4/SMAD7/TGFB1/TGFB3/THBS1/TP53/TRIM33/WNT1/ZEB1	31
GO:0010951	BP	GO:0010951	negative regulation of endopeptidase activity	31/754	160/18614	3.02527e-13	2.15267e-12	7.6436e-13	A2M/ADORA2A/AKT1/CD27/CD44/CST3/GAPDH/HGF/IL9/KLF4/LAMP3/MIR29C/MMP9/PLAUR/PTGS2/RENBP/SERPINA1/SERPINE1/SERPINH1/SNCA/SRC/THBS1/TIMP1/TIMP2/TIMP3/TIMP4/TNF/TNFSF14/VEGFA/VTN/XIAP	31
GO:0009267	BP	GO:0009267	cellular response to starvation	31/754	170/18614	1.64003e-12	1.09466e-11	3.88686e-12	ALB/ATF3/ATF4/ATG5/BCL2/BECN1/BMPR2/CDKN1A/CTSK/EIF2AK3/FAS/FOS/FOXO3/HSPA5/IGF1R/KRT20/MAP1LC3A/MAP1LC3B/MAPK1/MAPK3/MAPK8/MTOR/NFE2L2/PPARA/PRKAA2/SIRT1/SLC2A1/TFEB/TP53/XBP1/ZC3H12A	31
GO:0010469	BP	GO:0010469	regulation of signaling receptor activity	31/754	177/18614	4.94927e-12	3.12116e-11	1.10825e-11	ACE2/ADAM17/AGTR2/APP/AREG/CCL2/CCR2/DKK1/EDN1/EGF/EPHB2/EREG/FCGR2B/GREM1/HBEGF/HIF1A/IFNG/IL10/ITGB1/JAK2/PINK1/PLAU/PPARA/PPARG/PRKCD/PTK2B/SERPINE1/SRC/TGFA/TNF/TSG101	31
GO:0009266	BP	GO:0009266	response to temperature stimulus	31/754	183/18614	1.21734e-11	7.39383e-11	2.62536e-11	ADM/AKT1/CALCA/CASP8/CD14/CD34/CREBBP/CXCL10/CXCL12/CXCR4/EIF2AK3/EP300/FGF1/FOS/GSK3B/HMOX1/HSP90AA1/HSPA1A/IGF1/IL1A/LXN/MAP2K7/MAPKAPK2/MTOR/NFKBIA/NOS3/PTGS2/SIRT1/SOD1/SOD2/THBS1	31
GO:0051495	BP	GO:0051495	positive regulation of cytoskeleton organization	31/754	190/18614	3.30836e-11	1.88281e-10	6.68538e-11	ABL1/APOA1/CCL11/CCL21/CCL24/CCL26/CCN2/CCR7/CD47/CDC42/CSF3/CX3CL1/EDN1/F2RL1/HSPA1A/LPAR1/MECP2/MET/MTOR/NUP62/OCLN/P2RX7/PTK2B/PYCARD/RAC1/RHOA/SDC4/SMAD3/TEK/TGFB3/TGFBR1	31
GO:0019318	BP	GO:0019318	hexose metabolic process	31/754	228/18614	3.43934e-09	1.53347e-08	5.44495e-09	ADIPOQ/AKT1/AKT2/ATF3/ATF4/EP300/FUT1/FUT4/GAPDH/GLB1/GPT/GSK3A/IGF1/IGF2/IGFBP3/INS/LEP/LRP5/MAPK14/NR3C1/PDX1/PFKFB3/PGM1/PPARA/PPARGC1A/PTH/RORC/SIRT1/SRC/TNF/TP53	31
GO:0022604	BP	GO:0022604	regulation of cell morphogenesis	31/754	245/18614	1.94185e-08	7.73975e-08	2.74819e-08	ANXA1/CCL11/CCL13/CCL2/CCL24/CCL3/CCL7/CD44/CLDN4/CSF1R/CXCR4/ENPP2/EPHB2/F2/FN1/GNA13/ITGB2/KDR/KIT/LPAR1/MIR21/MYH14/PDPN/PLXNA2/PTK2/PTK2B/RAC1/SPARC/SRC/VEGFA/WNT5A	31
GO:0045926	BP	GO:0045926	negative regulation of growth	31/754	252/18614	3.76382e-08	1.43971e-07	5.11206e-08	ACVRL1/AGT/AGTR2/BCL2/BMP4/BMPR2/CDH1/CDKN1A/CDKN2A/GDF15/GREM1/GSK3A/HIF1A/HSPA1A/IGFBP5/LGMN/NPPB/PPARA/PTEN/SEMA7A/SIRT1/SMAD3/SMAD4/SPP1/TGFB1/TGFB2/TGFBR2/TP53/WNT3A/WNT5A/YY1	31
GO:0034976	BP	GO:0034976	response to endoplasmic reticulum stress	31/754	259/18614	7.09995e-08	2.6331e-07	9.34947e-08	ABL1/ALOX5/ATF3/ATF4/ATF6/BAX/BBC3/BCL2/BCL2L1/CAV1/CCND1/CEBPB/CFTR/CXCL8/DDIT3/EIF2AK3/ERN1/FCGR2B/GSK3B/HSPA1A/HSPA5/JUN/MIR200C/NFE2L2/PDX1/PIK3R1/SIRT1/THBS1/TNFRSF10B/TP53/XBP1	31
GO:0016236	BP	GO:0016236	macroautophagy	31/754	322/18614	7.87835e-06	2.22597e-05	7.90388e-06	AKT1/ATG5/BECN1/CASP3/CTSD/ERN1/GAPDH/HIF1A/HMOX1/IL4/KDR/MAP1LC3A/MAP1LC3B/MAP3K7/MAPK3/MAPK8/MTOR/NOD2/PINK1/PRKAA2/RIPK2/SIRT1/SQSTM1/SRC/STING1/TAFAZZIN/TBK1/TCIRG1/TGFB1/TP53/TSG101	31
GO:0018205	BP	GO:0018205	peptidyl-lysine modification	31/754	374/18614	0.000137829	0.000325671	0.000115638	ACTB/ATG5/CREBBP/CTNNB1/EGR1/EP300/FOXP3/GATA3/HDAC9/IFIH1/IRF4/LEF1/LIF/LOX/LOXL2/MAP3K7/MDM2/MECP2/MUC1/PPARGC1A/PRKAA2/RELA/SHH/SIRT1/SIRT3/SMAD4/SNAI2/SNCA/SPI1/TOLLIP/TWIST1	31
GO:1901987	BP	GO:1901987	regulation of cell cycle phase transition	31/754	457/18614	0.00367282	0.00682181	0.00242226	ACTB/ADAM17/AIF1/AKT1/ANXA1/APC/APP/BCL2/BID/CCL2/CCND1/CDKN1A/CDKN2A/DUSP1/EGFR/FGF10/GLI1/KLF4/MAPK14/MDM2/MECP2/MIR29A/MIR29B1/MIR29C/MUC1/PARP9/PTEN/PTPN11/SOX2/TERT/TP53	31
GO:0046982	MF	GO:0046982	protein heterodimerization activity	31/751	343/18369	3.26133e-05	0.000244143	0.000167157	AGTR1/AHR/ATF3/ATF4/ATF6/BAX/BCL2/BCL2A1/BCL2L1/CAV1/CEACAM8/CEBPB/CHUK/CYBB/DDIT3/ERBB2/GPHA2/HIF1A/IL12B/IL17A/IL17F/IRAK3/ITGB1/MCL1/PDGFA/PDGFB/PIK3R1/TLR4/TP53/XBP1/ZHX2	31
GO:0004857	MF	GO:0004857	enzyme inhibitor activity	31/751	359/18369	7.6983e-05	0.000536204	0.000367123	A2M/ANGPTL3/ANXA1/ANXA5/APP/C3/CD27/CDKN1A/CST3/F2RL1/FURIN/GAPDH/LGALS3/LXN/NGF/PARP9/RENBP/ROCK1/SCGB1A1/SERPINA1/SERPINE1/SERPINH1/SNCA/SOCS1/SOCS3/TIMP1/TIMP2/TIMP3/TIMP4/TNFSF14/XIAP	31
GO:0032731	BP	GO:0032731	positive regulation of interleukin-1 beta production	30/754	63/18614	2.32402e-25	4.15798e-24	1.4764e-24	AGER/AIM2/APP/CASP1/CASP8/CCL19/CCL3/EGR1/F2RL1/GSDMD/HSPB1/IFNG/IL17A/IL6/JAK2/LGALS9/MYD88/NLRC4/NLRP1/NLRP3/NOD2/P2RX7/PYCARD/RIPK2/SMAD3/STAT3/TLR4/TLR8/TNF/WNT5A	30
GO:0048247	BP	GO:0048247	lymphocyte chemotaxis	30/754	64/18614	4.20964e-25	7.43658e-24	2.64055e-24	ADAM10/ADAM17/CCL1/CCL11/CCL13/CCL17/CCL18/CCL19/CCL2/CCL20/CCL21/CCL22/CCL24/CCL26/CCL3/CCL4/CCL5/CCL7/CCL8/CCR2/CX3CL1/CXCL10/CXCL11/CXCL13/CXCL16/PIK3CD/PIK3CG/PTK2B/TNFSF14/WNT5A	30
GO:0046209	BP	GO:0046209	nitric oxide metabolic process	30/754	83/18614	4.35446e-21	6.00615e-20	2.13263e-20	AGT/AGTR2/AIF1/AKT1/CAV1/CD34/CD47/CX3CR1/EDN1/HSP90AA1/IFNG/IL10/IL1B/JAK2/KLF4/MMP8/NOS2/NOS3/PTGS2/PTK2B/PTX3/RAC1/SIRPA/SMAD3/SOD2/TICAM1/TLR2/TLR4/TNF/ZC3H12A	30
GO:2001057	BP	GO:2001057	reactive nitrogen species metabolic process	30/754	84/18614	6.51811e-21	8.7324e-20	3.10066e-20	AGT/AGTR2/AIF1/AKT1/CAV1/CD34/CD47/CX3CR1/EDN1/HSP90AA1/IFNG/IL10/IL1B/JAK2/KLF4/MMP8/NOS2/NOS3/PTGS2/PTK2B/PTX3/RAC1/SIRPA/SMAD3/SOD2/TICAM1/TLR2/TLR4/TNF/ZC3H12A	30
GO:0060191	BP	GO:0060191	regulation of lipase activity	30/754	89/18614	4.45897e-20	5.68798e-19	2.01966e-19	ABL1/AGT/AGTR1/ANGPTL3/ANXA1/C5AR1/CCL5/CD86/EDNRA/EGFR/ESR1/FGF2/FGFR1/FGFR2/FLT1/FURIN/GNA13/HDAC9/ITK/KIT/LPAR1/LRP1/PDGFRA/PDGFRB/PLA2G1B/PTH/RHOA/SELE/SNCA/TXK	30
GO:1903035	BP	GO:1903035	negative regulation of response to wounding	30/754	93/18614	1.87406e-19	2.23292e-18	7.92853e-19	ALOX5/APCS/APOE/CD34/CD9/EDN1/F2/FAP/FGB/FGF2/MIR34A/MMRN1/NOS3/PDGFA/PDGFB/PDGFRA/PLAT/PLAU/PLAUR/PLG/PRKCD/PTEN/SERPINE1/SMAD3/SPP1/THBD/THBS1/TNF/UBASH3B/VTN	30
GO:1904705	BP	GO:1904705	regulation of vascular associated smooth muscle cell proliferation	30/754	95/18614	3.72514e-19	4.32307e-18	1.53501e-18	ADIPOQ/AGT/BMP4/CDKN1A/EDN1/ERN1/FGF2/FGF9/GNA13/HMOX1/IGF1/IGFBP5/IL10/JAK2/JUN/MIR146A/MIR21/MIR34A/MMP2/MMP9/PDGFB/PPARG/PTEN/RHOA/S1PR2/SOD2/SRC/TERT/TGFB3/TNF	30
GO:0036473	BP	GO:0036473	cell death in response to oxidative stress	30/754	99/18614	1.39083e-18	1.53926e-17	5.46554e-18	ABL1/AKT1/ATF4/BCL2/CTNNB1/HGF/HIF1A/HSPB1/IL10/INS/JAK2/MCL1/MET/MIR21/MIR29B1/MIR34A/MMP3/NFE2L2/NOX1/PARP1/PINK1/PRKCD/SIRT1/SOD1/SOD2/TLR4/TNF/TREM2/TXN/WNT1	30
GO:0140888	BP	GO:0140888	interferon-mediated signaling pathway	30/754	100/18614	1.91196e-18	2.10353e-17	7.4691e-18	ADAR/ARG1/IFI27/IFNA1/IFNA2/IFNAR1/IFNB1/IFNG/IRF1/IRF3/IRF7/ISG15/JAK1/JAK2/MAVS/MIR21/MMP12/MYD88/PARP9/PPARG/PTPN11/STAT1/STAT2/STING1/TBK1/TP53/TRAF3/TXK/TYK2/WNT5A	30
GO:0002532	BP	GO:0002532	production of molecular mediator involved in inflammatory response	30/754	102/18614	3.56788e-18	3.84233e-17	1.36432e-17	ALOX5/BTK/CHIA/EPHB2/F2/HIF1A/IL17A/IL17F/IL17RA/IL1R2/IL4R/IL6/INS/LEP/MAPK14/MIR146A/MIR21/MYD88/NOD2/NOS2/PPARA/PYCARD/SERPINE1/SIRPA/STAT3/TICAM1/TLR4/TNF/TREM2/ZC3H12A	30
GO:0045639	BP	GO:0045639	positive regulation of myeloid cell differentiation	30/754	103/18614	4.84424e-18	5.17705e-17	1.83824e-17	CASP8/CCR1/CD4/CREB1/CSF1/CSF3/FOS/FOXO3/HIF1A/HLA-DRB1/HSPA1A/IFNG/IL12B/IL17A/IL23A/IL5/ISG15/KITLG/LEF1/LIF/MAPK14/MIR145/PF4/STAT1/STAT3/TGFB1/TNF/TNFSF11/TRAF6/TREM2	30
GO:0033209	BP	GO:0033209	tumor necrosis factor-mediated signaling pathway	30/754	109/18614	2.80203e-17	2.82219e-16	1.00209e-16	ADAM17/ADIPOQ/AIM2/APOA1/CASP1/CASP8/CHUK/F2RL1/FAS/FOXO3/HSPA1A/JAK2/KRT8/MIR34A/NFKBIA/PTK2B/PYCARD/RELA/SPHK1/STAT1/TNF/TNFAIP3/TNFRSF1A/TNFRSF1B/TNFSF11/TNFSF13B/TP53/TRAF3/TRAF6/XIAP	30
GO:0045446	BP	GO:0045446	endothelial cell differentiation	30/754	119/18614	3.99125e-16	3.63431e-15	1.29045e-15	ACVRL1/BMP4/BMPR2/CDH5/CTNNB1/CXCR4/EDNRA/F2RL1/FASN/FOXP3/ICAM1/IL1B/KDM6B/KDR/MET/MIR200C/MIR21/MIR34A/MYD88/PDPN/PECAM1/ROCK1/S1PR1/S1PR2/SMAD4/TJP1/TNF/TNFRSF1A/VEGFA/ZEB1	30
GO:0051101	BP	GO:0051101	regulation of DNA binding	30/754	120/18614	5.12091e-16	4.61789e-15	1.6397e-15	AGER/CTNNB1/DDIT3/EGF/EP300/GATA3/HMGA2/HMGB1/HMOX1/IFNG/IGF1/IRF4/JAK2/JUN/KLF4/LEF1/LIF/MAPK8/MMP8/MMP9/NFKBIA/NGF/PARP1/PDX1/PLAUR/PPARG/TGFB1/TRAF6/TWIST1/TXN	30
GO:0048565	BP	GO:0048565	digestive tract development	30/754	134/18614	1.28467e-14	1.02335e-13	3.63366e-14	BCL2/BMP4/COL3A1/CTNNB1/CXCL8/EGFR/FGF10/FGF9/FGFR2/GATA6/GLI1/GLI2/HIF1A/IL6ST/KIT/MIR29B1/PDGFRA/PDX1/SHH/SMAD2/SMAD3/SOX9/SRC/TGFB2/TGFB3/TGFBR2/TNF/TP63/WNT5A/YAP1	30
GO:1902905	BP	GO:1902905	positive regulation of supramolecular fiber organization	30/754	171/18614	1.04638e-11	6.3971e-11	2.27145e-11	ABL1/APOA1/APOE/APP/CCL11/CCL21/CCL24/CCL26/CCN2/CCR7/CD47/CDC42/CSF3/CX3CL1/EDN1/F2RL1/HSPA1A/LPAR1/MECP2/MET/MTOR/OCLN/PTK2B/PYCARD/RAC1/RHOA/SDC4/SMAD3/TGFB3/TGFBR1	30
GO:0019722	BP	GO:0019722	calcium-mediated signaling	30/754	187/18614	1.05765e-10	5.7115e-10	2.02801e-10	AGTR1/BTK/CCL20/CCL3/CCL4/CCR5/CCR6/CD4/CXCL8/CXCR4/EDN1/EIF2AK3/FCGR3A/GSK3B/IGF1/KDR/MCU/MTOR/NFATC1/P2RX7/PTGDR2/PTK2B/PTPRC/SELE/SELP/SPHK1/TNF/TNFSF11/TREM2/VCAM1	30
GO:0051302	BP	GO:0051302	regulation of cell division	30/754	187/18614	1.05765e-10	5.7115e-10	2.02801e-10	BCL2L1/BECN1/CAT/CDC42/CXCR5/EREG/FGF1/FGF2/FGF7/FGF9/FGFR2/IGF1R/IGF2/IL1A/IL1B/MIR145/MYC/NUP62/OSM/PDGFA/PDGFB/PPBP/RHOA/SHH/TGFA/TGFB1/TGFB2/TGFB3/TP63/VEGFA	30
GO:0071772	BP	GO:0071772	response to BMP	30/754	187/18614	1.05765e-10	5.7115e-10	2.02801e-10	ABL1/ACVRL1/BMP2/BMP4/BMP7/BMPR2/CDH5/DKK1/EGR1/ENG/GATA3/GATA6/GREM1/KDR/LEF1/MAPK3/MIR21/PPARG/SMAD1/SMAD2/SMAD4/SMAD7/SOX9/TGFB1/TGFB2/TGFB3/TRIM33/WNT1/WNT5A/XIAP	30
GO:0071773	BP	GO:0071773	cellular response to BMP stimulus	30/754	187/18614	1.05765e-10	5.7115e-10	2.02801e-10	ABL1/ACVRL1/BMP2/BMP4/BMP7/BMPR2/CDH5/DKK1/EGR1/ENG/GATA3/GATA6/GREM1/KDR/LEF1/MAPK3/MIR21/PPARG/SMAD1/SMAD2/SMAD4/SMAD7/SOX9/TGFB1/TGFB2/TGFB3/TRIM33/WNT1/WNT5A/XIAP	30
GO:0048705	BP	GO:0048705	skeletal system morphogenesis	30/754	229/18614	1.47337e-08	6.00065e-08	2.13068e-08	AXIN2/BMP1/BMP4/BMP7/BMPR2/CCN2/COL1A1/COL3A1/CTNNB1/FGFR1/FGFR2/GREM1/HAS2/LRP5/MAPK14/MMP13/MMP14/MMP2/P2RX7/PDGFRA/SERPINH1/SMAD2/SMAD3/SOX9/TGFB3/TGFBR1/TGFBR2/TWIST1/WNT7A/ZEB1	30
GO:0002790	BP	GO:0002790	peptide secretion	30/754	243/18614	5.75161e-08	2.15445e-07	7.64991e-08	ALOX5/ANXA1/CCL5/CD38/CFTR/EDN1/F2/F2RL1/FGB/GRP/HIF1A/HLA-DRB1/IFNG/IL1B/IL1RN/IL6/INS/JAK2/LEP/LRP5/MCU/NOS2/PDX1/PTPN11/S100A8/SMAD2/SYT7/TCIRG1/TNF/TNFSF11	30
GO:1903320	BP	GO:1903320	regulation of protein modification by small protein conjugation or removal	30/754	255/18614	1.68824e-07	5.97985e-07	2.1233e-07	ABL1/AKT1/ANGPT1/ATG5/AXIN1/CAV1/CTNNB1/EGR1/GSK3A/HIF1A/HSP90AA1/HSPA1A/HSPA5/ISG15/NOD2/PINK1/PTEN/RELA/RIPK2/SMAD7/SPHK1/SQSTM1/TGFBR1/TICAM1/TNFAIP3/TOLLIP/TRAF6/TRIM21/XIAP/ZC3H12A	30
GO:0031647	BP	GO:0031647	regulation of protein stability	30/754	322/18614	2.07253e-05	5.53994e-05	1.9671e-05	APOA1/BCL2/BMP2/CASP3/CREB1/CREBBP/EP300/GAPDH/HPS4/HSP90AA1/HSPA1A/IGF1/LAMP1/MAPK1/MDM2/PIK3R1/PINK1/PPARGC1A/PRKCD/PTEN/PYCARD/SIRT1/SMAD3/SMAD7/SNCA/SRC/TERT/TF/TP53/TRIM21	30
GO:0010639	BP	GO:0010639	negative regulation of organelle organization	30/754	362/18614	0.000176209	0.000409279	0.000145325	AKT1/APC/BCL2L1/BECN1/BMP4/BMP7/CDH5/DUSP1/HGF/HSPA1A/IGF1/LIF/MET/MIR21/PARP1/PIK3R1/PINK1/PPARG/PRKCD/RTEL1/S1PR1/SMAD4/SNCA/SRC/TFRC/TJP1/TP53/TRIM37/WAPL/YAP1	30
GO:0006631	BP	GO:0006631	fatty acid metabolic process	30/754	394/18614	0.00073041	0.00153252	0.00054416	ADIPOQ/AKT1/AKT2/ALOX5/ANGPTL3/ANXA1/C3/CAV1/EDN1/FASN/IL1B/INS/LEP/MAPK14/MIF/PLA2G1B/PLA2G4A/PLA2G4C/PPARA/PPARGC1A/PRKAA2/PTGDS/PTGS1/PTGS2/SIRT1/SNCA/SOX9/TNFRSF1A/TWIST1/XBP1	30
GO:0009259	BP	GO:0009259	ribonucleotide metabolic process	30/754	464/18614	0.00819298	0.0143288	0.00508779	APP/CMPK1/ENPP3/EP300/GAPDH/HIF1A/HPRT1/HSPA1A/IFNG/IGF1/IL4/INS/MTOR/NPPB/NT5E/P2RX7/PARP1/PDE4A/PGM1/PINK1/PPARA/PPARGC1A/PRKAA2/PTH/RHOA/SNCA/STAT3/TAFAZZIN/TGFB1/TREM2	30
GO:0019693	BP	GO:0019693	ribose phosphate metabolic process	30/754	473/18614	0.0105603	0.0179804	0.00638441	APP/CMPK1/ENPP3/EP300/GAPDH/HIF1A/HPRT1/HSPA1A/IFNG/IGF1/IL4/INS/MTOR/NPPB/NT5E/P2RX7/PARP1/PDE4A/PGM1/PINK1/PPARA/PPARGC1A/PRKAA2/PTH/RHOA/SNCA/STAT3/TAFAZZIN/TGFB1/TREM2	30
GO:0046700	BP	GO:0046700	heterocycle catabolic process	30/754	488/18614	0.0157276	0.0258814	0.00918985	AICDA/AKT1/AXIN2/BAX/ENPP3/ERN1/FASTK/GSK3A/HMOX1/HPRT1/HSPA1A/IDO1/IL6/MAPK14/MAPKAPK2/MIR146A/MYD88/NFE2L2/NT5E/PDE4A/PRKCD/RNASE3/ROCK1/SCGB1A1/SSB/TNFRSF1B/VIM/ZC3H12A/ZC3H4/ZHX2	30
GO:0031091	CC	GO:0031091	platelet alpha granule	30/756	91/19518	2.67851e-20	1.22944e-18	8.74041e-19	A2M/ALB/APP/CD9/EGF/FGB/FN1/HGF/IGF1/IGF2/ITGB3/MMRN1/PDGFA/PDGFB/PECAM1/PF4/PLG/PPBP/SELP/SERPINA1/SERPINE1/SNCA/SPARC/TGFB1/TGFB2/TGFB3/THBS1/TIMP1/VEGFA/VWF	30
GO:0045178	CC	GO:0045178	basal part of cell	30/756	285/19518	7.36157e-07	7.34557e-06	5.22217e-06	ACE/ANXA1/AQP5/BSG/C5AR1/CD34/CD38/CD44/CDH2/CLDN4/CTNNB1/EDN1/EGFR/EPCAM/ERBB2/FAP/HSP90AA1/ITGA1/LRP1/MET/NOD2/PDGFB/PDPN/SLC2A1/TEK/TF/TFRC/TGFA/TJP1/TLR9	30
GO:0098978	CC	GO:0098978	glutamatergic synapse	30/756	410/19518	0.000682746	0.00373072	0.00265227	ACTB/ADAM10/ADORA2A/ADORA2B/AKT1/APOE/CDC42/CDH1/CDH11/CTNNB1/DROSHA/EFNB2/EPHB2/GSK3B/ITGB1/ITGB3/JAK2/LPAR1/MAP1LC3A/MAPK14/MAPK3/PLAT/PTK2B/RAC1/RELA/RHOA/SRC/WNT3A/WNT5A/WNT7A	30
GO:0061134	MF	GO:0061134	peptidase regulator activity	30/751	230/18369	1.99932e-08	2.67212e-07	1.82952e-07	A2M/APP/C3/CASP1/CAV1/CD27/CST3/CTSK/CTSL/FN1/FURIN/GAPDH/LXN/NGF/NLRC4/NLRP1/PINK1/PYCARD/RENBP/ROCK1/SERPINA1/SERPINE1/SERPINH1/SNCA/TIMP1/TIMP2/TIMP3/TIMP4/TNFSF14/XIAP	30
GO:0030246	MF	GO:0030246	carbohydrate binding	30/751	273/18369	8.9271e-07	8.82791e-06	6.04421e-06	APCS/BSG/CD207/CD209/CD34/CD69/CHI3L1/ENG/ENPP2/FCER2/FCN1/HLA-DRA/HLA-DRB1/IL2/KLRB1/LGALS1/LGALS3/LGALS9/LOXL2/MRC1/PTX3/SELE/SELL/SELP/SFTPA1/SFTPA2/SFTPD/SIGLEC1/VCAN/VTN	30
GO:0061900	BP	GO:0061900	glial cell activation	29/754	55/18614	3.22464e-26	6.10068e-25	2.1662e-25	ADORA2A/AGER/AIF1/APP/C1QA/C5AR1/CCL3/CX3CL1/CX3CR1/IFNG/IL13/IL1B/IL33/IL4/IL6/ITGAM/ITGB2/JAK2/JUN/LRP1/MMP8/PTPRC/SNCA/SPHK1/TLR2/TLR3/TLR9/TNF/TREM2	29
GO:1901224	BP	GO:1901224	positive regulation of NIK/NF-kappaB signaling	29/754	67/18614	4.50277e-23	7.00431e-22	2.48706e-22	AGER/APP/CCL19/CD14/CD27/CD86/EDN1/EGFR/EP300/GREM1/IL12B/IL18/IL1B/IL23A/LGALS9/MMP8/NOD2/RELA/RHOA/SPHK1/TLR2/TLR3/TLR4/TLR7/TLR9/TNF/TNFSF14/TRAF6/TREM2	29
GO:0006809	BP	GO:0006809	nitric oxide biosynthetic process	29/754	77/18614	5.14134e-21	7.02232e-20	2.49345e-20	AGT/AGTR2/AIF1/AKT1/CAV1/CD34/CD47/CX3CR1/EDN1/HSP90AA1/IFNG/IL10/IL1B/JAK2/KLF4/MMP8/NOS2/NOS3/PTGS2/PTK2B/PTX3/RAC1/SIRPA/SMAD3/SOD2/TICAM1/TLR4/TNF/ZC3H12A	29
GO:0061045	BP	GO:0061045	negative regulation of wound healing	29/754	78/18614	7.87547e-21	1.04509e-19	3.71084e-20	ALOX5/APCS/APOE/CD34/CD9/EDN1/F2/FAP/FGB/FGF2/MIR34A/MMRN1/NOS3/PDGFA/PDGFB/PDGFRA/PLAT/PLAU/PLAUR/PLG/PRKCD/PTEN/SERPINE1/SMAD3/THBD/THBS1/TNF/UBASH3B/VTN	29
GO:0048145	BP	GO:0048145	regulation of fibroblast proliferation	29/754	87/18614	2.68369e-19	3.15066e-18	1.11872e-18	ABL1/AGT/BAX/CAV1/CDKN1A/CTNNB1/EGFR/EREG/ESR1/FGF10/FN1/FOSL2/IGF1/IL13/ITGB3/JUN/LIF/MIF/MYC/PDGFA/PDGFB/PDGFRA/PDGFRB/PLA2G1B/SOD2/SPHK1/TP53/WNT1/WNT5A	29
GO:0048708	BP	GO:0048708	astrocyte differentiation	29/754	87/18614	2.68369e-19	3.15066e-18	1.11872e-18	ABL1/ADORA2A/AGER/APP/BMP2/C1QA/C5AR1/F2/IFNG/IL1B/IL6/IL6ST/KRAS/LIF/LRP1/MAP2K1/MAPK1/MAPK3/NR3C1/PTPN11/S100A8/S100A9/SHH/SOX9/STAT3/TLR4/TNF/TREM2/VIM	29
GO:1900407	BP	GO:1900407	regulation of cellular response to oxidative stress	29/754	94/18614	3.01465e-18	3.26538e-17	1.15946e-17	ABL1/AKT1/ALOX5/ATF4/BMP7/CTNNB1/HGF/HIF1A/HSPB1/IL10/INS/MCL1/MET/MIR21/MIR29B1/MIR34A/MMP3/NFE2L2/NOX1/PARP1/PINK1/SIRT1/SOD1/SOD2/TLR4/TNF/TREM2/TXN/WNT1	29
GO:0001823	BP	GO:0001823	mesonephros development	29/754	102/18614	3.61581e-17	3.61581e-16	1.28389e-16	AGT/AGTR2/BCL2/BMP2/BMP4/BMP7/CAT/CTNNB1/EPCAM/FGF1/FGF10/FGF2/FGFR2/FOXJ1/GATA3/GREM1/MYC/REN/SDC1/SDC4/SHH/SMAD1/SMAD2/SMAD3/SMAD4/SMAD7/SOX9/VEGFA/WNT1	29
GO:1902882	BP	GO:1902882	regulation of response to oxidative stress	29/754	103/18614	4.84298e-17	4.78319e-16	1.69839e-16	ABL1/AKT1/ALOX5/ATF4/BMP7/CTNNB1/HGF/HIF1A/HSPB1/IL10/INS/MCL1/MET/MIR21/MIR29B1/MIR34A/MMP3/NFE2L2/NOX1/PARP1/PINK1/SIRT1/SOD1/SOD2/TLR4/TNF/TREM2/TXN/WNT1	29
GO:0030278	BP	GO:0030278	regulation of ossification	29/754	119/18614	3.28095e-15	2.73412e-14	9.70819e-15	ALOX5/BCL2/BMP2/BMP4/BMP7/BMPR2/CALCA/CCL3/CCR1/CSF1/DKK1/GREM1/HIF1A/ISG15/KL/MAPK1/MAPK14/MAPK3/P2RX7/PTH/PTK2B/PTPN11/RXRA/S1PR1/SMAD3/SMAD7/SOX9/TWIST1/WNT5A	29
GO:0032355	BP	GO:0032355	response to estradiol	29/754	120/18614	4.16333e-15	3.44382e-14	1.22281e-14	AGT/ANXA1/AREG/BMP7/CASP3/CASP8/CASP9/CAT/CCN2/CCND1/CD38/CFLAR/COL1A1/CTNNB1/EGFR/ESR1/FGF10/IGF1R/IGFBP2/IL10/LEP/MBD2/MMP2/PDGFA/PDGFRB/PTGS2/STAT3/TGFB1/WNT7A	29
GO:0030282	BP	GO:0030282	bone mineralization	29/754	121/18614	5.26914e-15	4.34569e-14	1.54305e-14	ALOX5/ATF4/AXIN2/BMP2/BMP4/BMP7/BMPR2/CCL3/CCR1/COL1A2/EIF2AK3/FGFR2/GREM1/HIF1A/IGF1/ISG15/KL/LEP/LOX/MMP13/P2RX7/PTGS2/PTH/PTK2B/RXRA/S1PR1/SMAD3/SOX9/TWIST1	29
GO:0008584	BP	GO:0008584	male gonad development	29/754	144/18614	6.34549e-13	4.40331e-12	1.56351e-12	ACE/AR/ATN1/BAX/BCL2/BCL2L1/CCND1/ESR1/FGF9/GATA3/GATA6/IL1A/KIT/KITLG/MMP14/NKX2-1/PDGFA/PDGFRA/PDGFRB/REN/SDC1/SMAD4/SOX9/TGFB2/TGFBR1/TLR3/TLR9/TNFSF10/WNT5A	29
GO:0046546	BP	GO:0046546	development of primary male sexual characteristics	29/754	145/18614	7.63272e-13	5.25747e-12	1.8668e-12	ACE/AR/ATN1/BAX/BCL2/BCL2L1/CCND1/ESR1/FGF9/GATA3/GATA6/IL1A/KIT/KITLG/MMP14/NKX2-1/PDGFA/PDGFRA/PDGFRB/REN/SDC1/SMAD4/SOX9/TGFB2/TGFBR1/TLR3/TLR9/TNFSF10/WNT5A	29
GO:0030177	BP	GO:0030177	positive regulation of Wnt signaling pathway	29/754	146/18614	9.16538e-13	6.27459e-12	2.22795e-12	ABL1/BMP2/CAV1/CCN4/COL1A1/DKK1/EGF/EGFR/FGF10/FGF2/FGF9/FGFR2/LEF1/LGR5/MBD2/MIR145/MIR29B1/NFKB1/SHH/SMAD3/SRC/TERT/TGFB1/TLR2/TNFAIP3/WNT3A/WNT5A/XIAP/YAP1	29
GO:0017015	BP	GO:0017015	regulation of transforming growth factor beta receptor signaling pathway	29/754	148/18614	1.31495e-12	8.84e-12	3.13886e-12	ADAM17/AXIN1/BMP2/CAV1/CREBBP/ENG/EP300/HSPA1A/HSPA5/IL17F/LOX/LTBP1/MIR21/MIR29B1/NKX2-1/PPARA/PPARG/SIRT1/SMAD2/SMAD3/SMAD4/SMAD7/TGFB1/TGFB3/THBS1/TP53/TRIM33/WNT1/ZEB1	29
GO:0048839	BP	GO:0048839	inner ear development	29/754	193/18614	1.06009e-09	5.09136e-09	1.80782e-09	ADAM10/ATG5/BMP2/BMP4/CEBPA/EPHB2/FGF10/FGF2/FGF9/FGFR2/FZD3/GATA3/LGR5/MAFB/MAPKAPK2/PDGFA/PDGFRB/PTPN11/SDC4/SHH/SOD1/SOX2/SOX9/TGFB2/TGFB3/WNT1/WNT3A/WNT5A/ZEB1	29
GO:0043433	BP	GO:0043433	negative regulation of DNA-binding transcription factor activity	29/754	194/18614	1.19943e-09	5.68741e-09	2.01946e-09	AIM2/BMP7/CAT/CDKN2A/CHUK/DDIT3/ESR1/FOXJ1/FOXP3/HMOX1/IL10/IRAK3/KEAP1/KLF4/MIR21/NFKBIA/NLRP3/NOD2/PYCARD/SIRT1/SMAD7/SPI1/TLR9/TNFAIP3/TRAF3/TRIM21/TRIM37/TWIST1/ZC3H12A	29
GO:0009746	BP	GO:0009746	response to hexose	29/754	199/18614	2.1946e-09	1.00325e-08	3.56228e-09	ACE/ADIPOQ/AGER/ANGPT2/CASP3/CCN2/CFTR/CMA1/EGR1/ERN1/HIF1A/HLA-DRB1/IGF1R/LRP5/MIR146A/NOX4/PDX1/PRKAA2/PTGS2/PTK2B/RHOA/SMAD2/SMAD4/SRF/TGFBR2/THBS1/TNF/TREM2/XBP1	29
GO:0048588	BP	GO:0048588	developmental cell growth	29/754	231/18614	6.6147e-08	2.46128e-07	8.73941e-08	ABL1/AGT/APOE/APP/BMPR2/CDH1/CTNNB1/CXCL12/CXCR4/EDN1/EDNRA/FN1/GSK3A/GSK3B/HSP90AA1/IGF1/ITGB1/NGF/PPARA/SEMA7A/SMAD7/SOX9/SPP1/SRF/TGFBR2/VEGFA/WNT3A/WNT5A/YY1	29
GO:0030072	BP	GO:0030072	peptide hormone secretion	29/754	238/18614	1.2713e-07	4.56073e-07	1.6194e-07	ALOX5/ANXA1/CCL5/CD38/CFTR/EDN1/F2/F2RL1/FGB/GRP/HIF1A/HLA-DRB1/IFNG/IL1B/IL1RN/IL6/INS/JAK2/LEP/LRP5/MCU/NOS2/PDX1/PTPN11/SMAD2/SYT7/TCIRG1/TNF/TNFSF11	29
GO:0021537	BP	GO:0021537	telencephalon development	29/754	270/18614	1.79847e-06	5.5429e-06	1.96815e-06	ALK/BAX/BMP2/BMP4/CASP3/CDH2/COL3A1/CSF1R/CTNNB1/CXCL12/CXCR4/EGFR/EPHB2/FUT1/GSK3B/HIF1A/HPRT1/IGF1R/LEF1/LPAR1/NKX2-1/PTEN/RHOA/SEMA7A/SHH/SLC2A1/SRF/WNT3A/WNT5A	29
GO:0016311	BP	GO:0016311	dephosphorylation	29/754	342/18614	0.000151983	0.000355517	0.000126235	AGTR2/ALPP/BCL2/BMP2/CDH5/DUSP1/DUSP6/GSK3B/IFNG/ITGA1/JAK2/LGALS3/MIR146A/MTOR/PDGFRB/PINK1/PRKCD/PTEN/PTPN11/PTPRC/RIPK3/ROCK1/SMAD3/SMPD1/SRC/TGFB1/TGFB2/TNF/UBASH3B	29
GO:0009150	BP	GO:0009150	purine ribonucleotide metabolic process	29/754	445/18614	0.0083248	0.0145366	0.00516159	APP/ENPP3/EP300/GAPDH/HIF1A/HPRT1/HSPA1A/IFNG/IGF1/IL4/INS/MTOR/NPPB/NT5E/P2RX7/PARP1/PDE4A/PGM1/PINK1/PPARA/PPARGC1A/PRKAA2/PTH/RHOA/SNCA/STAT3/TAFAZZIN/TGFB1/TREM2	29
GO:0044772	BP	GO:0044772	mitotic cell cycle phase transition	29/754	467/18614	0.0153518	0.0252853	0.0089782	ACTB/ADAM17/AIF1/AKT1/ANXA1/APC/APP/BCL2/BID/CCL2/CCND1/CDKN1A/CDKN2A/DUSP1/EGFR/FGF10/FOXM1/ITGB1/KLF4/MDM2/MECP2/MIR29A/MIR29B1/MIR29C/MUC1/MYC/PTEN/TERT/TP53	29
GO:0044270	BP	GO:0044270	cellular nitrogen compound catabolic process	29/754	486/18614	0.0246864	0.0393073	0.0139571	AICDA/AKT1/AXIN2/BAX/ENPP3/ERN1/FASTK/GSK3A/HMOX1/HPRT1/HSPA1A/IDO1/IL6/MAPK14/MAPKAPK2/MIR146A/MYD88/NT5E/PDE4A/PRKCD/RNASE3/ROCK1/SCGB1A1/SSB/TNFRSF1B/VIM/ZC3H12A/ZC3H4/ZHX2	29
GO:0042581	CC	GO:0042581	specific granule	29/756	160/19518	3.43892e-12	7.89233e-11	5.61088e-11	ADAM10/ARG1/B2M/CAMP/CD47/CEACAM3/CEACAM8/CHI3L1/CHIT1/CTSD/CXCL1/CYBB/ELANE/GSDMD/ITGAL/ITGAM/ITGAV/ITGB2/LCN2/LYZ/MMP8/NEU1/NFKB1/PLAU/PLAUR/PTX3/TIMP2/TNFRSF1B/TOLLIP	29
GO:0070820	CC	GO:0070820	tertiary granule	29/756	164/19518	6.51823e-12	1.4247e-10	1.01286e-10	ADAM10/B2M/CAMP/CD47/CEACAM8/CHIT1/CST3/CTSD/CXCL1/CYBB/FPR1/GSDMD/ITGAM/ITGAX/ITGB2/LAMP1/LGALS3/LYZ/MMP8/MMP9/PGM1/PLAU/PPBP/PTX3/RAC1/RHOA/SIRPA/TCIRG1/TIMP2	29
GO:0030136	CC	GO:0030136	clathrin-coated vesicle	29/756	215/19518	4.96252e-09	7.41072e-08	5.26848e-08	ADAM10/APOE/AREG/CD207/CD4/CD9/CFTR/CTLA4/ECE1/EDN1/EGF/EGFR/EREG/FCGR1A/FURIN/HBEGF/HLA-DRA/HLA-DRB1/IL7R/SFTPA1/SFTPA2/SFTPB/SFTPC/SFTPD/TF/TFRC/TGFA/VWF/WNT5A	29
GO:0005765	CC	GO:0005765	lysosomal membrane	29/756	415/19518	0.00168303	0.00813169	0.00578105	ABCA3/ABCB6/ANPEP/CD63/CD68/CEACAM8/CFTR/CTSD/DPP4/ECE1/EGF/FPR1/HLA-DRA/HLA-DRB1/HPS4/LAMP1/LRP1/MARCHF8/MTOR/NEU1/OCLN/SLC17A5/SYT7/TCIRG1/TFEB/TLR3/TLR7/TLR8/TLR9	29
GO:0098852	CC	GO:0098852	lytic vacuole membrane	29/756	415/19518	0.00168303	0.00813169	0.00578105	ABCA3/ABCB6/ANPEP/CD63/CD68/CEACAM8/CFTR/CTSD/DPP4/ECE1/EGF/FPR1/HLA-DRA/HLA-DRB1/HPS4/LAMP1/LRP1/MARCHF8/MTOR/NEU1/OCLN/SLC17A5/SYT7/TCIRG1/TFEB/TLR3/TLR7/TLR8/TLR9	29
GO:0019903	MF	GO:0019903	protein phosphatase binding	29/751	140/18369	3.73621e-13	8.80207e-12	6.02652e-12	BCL2/CDH2/CDH5/CSF1R/CTNNB1/EGFR/EIF2AK3/ERBB2/HSP90AA1/ITGA1/JAK1/JAK3/LCK/LGALS3/MAP2K7/MAPK14/MAPK8/MET/PIK3R1/PTK2/SIRPA/SOD1/SPHK1/STAT1/STAT3/STAT6/TBK1/TP53/TRAF3	29
GO:0043370	BP	GO:0043370	regulation of CD4-positive, alpha-beta T cell differentiation	28/754	55/18614	8.53151e-25	1.47458e-23	5.23587e-24	ANXA1/CCL19/CD80/CD86/FOXP3/GATA3/HLA-DRA/HLA-DRB1/HMGB1/IFNG/IL12B/IL18/IL2/IL23A/IL27/IL4/IL4R/IRF4/JAK3/JUNB/LGALS9/MIR21/NLRP3/RIPK2/SMAD7/SOCS1/TBX21/ZC3H12A	28
GO:0030225	BP	GO:0030225	macrophage differentiation	28/754	58/18614	5.77758e-24	9.3781e-23	3.32993e-23	ADIPOQ/APP/BMP4/CASP8/CD4/CDC42/CEBPA/CSF1/CSF1R/CSF2/GATA3/HLA-DRB1/IFNG/IL15/IL1RL1/IL33/LIF/MIR145/MMP9/NR3C1/PARP1/PF4/SIRT1/SOCS1/SPI1/TGFB1/TLR2/VEGFA	28
GO:1905330	BP	GO:1905330	regulation of morphogenesis of an epithelium	28/754	65/18614	2.98498e-22	4.48148e-21	1.59126e-21	ABL1/AGT/AGTR2/AR/BMP4/BMP7/CTNNB1/CXCL10/EGF/ESR1/FGF1/FGF10/FGF2/FGF7/GATA3/GREM1/HGF/ITGAX/LIF/MIR21/PDGFA/PIK3CD/SHH/SNAI2/SOX9/TNF/VEGFA/WNT5A	28
GO:0072678	BP	GO:0072678	T cell migration	28/754	71/18614	5.56771e-21	7.54944e-20	2.68062e-20	ABL1/ADAM10/ADAM17/AIF1/APP/CCL2/CCL20/CCL21/CCL26/CCL3/CCL5/CCR2/CCR6/CXCL10/CXCL11/CXCL12/CXCL13/CXCL16/ITGAL/ITGB3/PIK3CD/PIK3CG/PYCARD/RHOA/RIPK3/S1PR1/TNFSF14/WNT5A	28
GO:0050818	BP	GO:0050818	regulation of coagulation	28/754	75/18614	3.25321e-20	4.20739e-19	1.49394e-19	ANXA5/APOE/CAV1/CD34/CD9/EDN1/EPHB2/F2/F2R/F2RL1/F3/FAP/FGB/NFE2L2/NOS3/PDGFA/PDGFB/PDGFRA/PLAT/PLAU/PLAUR/PLG/PRKCD/SERPINE1/THBD/THBS1/UBASH3B/VTN	28
GO:0002637	BP	GO:0002637	regulation of immunoglobulin production	28/754	76/18614	4.95663e-20	6.29414e-19	2.23489e-19	BTK/CD28/CD40/CD40LG/CD86/EPHB2/FCGR2B/FOXP3/IL10/IL13/IL13RA2/IL2/IL21/IL33/IL4/IL4R/IL5/IL6/MZB1/PTPRC/STAT6/TBX21/TFRC/TGFB1/TLR9/TNF/TRAF6/XBP1	28
GO:0032729	BP	GO:0032729	positive regulation of type II interferon production	28/754	77/18614	7.4952e-20	9.20464e-19	3.26834e-19	ABL1/CCR2/CD14/CD2/F2RL1/IL12B/IL18/IL1B/IL1R1/IL2/IL21/IL23A/IL27/IRF8/ISG15/JAK2/LGALS9/PYCARD/RIPK2/TLR3/TLR4/TLR7/TLR8/TLR9/TNF/TXK/TYK2/WNT5A	28
GO:0002720	BP	GO:0002720	positive regulation of cytokine production involved in immune response	28/754	80/18614	2.48289e-19	2.9272e-18	1.03938e-18	B2M/F2RL1/GATA3/IL18/IL1B/IL1R1/IL4/IL6/KIT/MAP3K7/MAPKAPK2/MAVS/MIF/MYD88/NLRP3/NOD2/P2RX7/PYCARD/RIPK2/SEMA7A/SIRT1/TBX21/TICAM1/TLR3/TLR4/TLR7/TRAF6/WNT5A	28
GO:0033077	BP	GO:0033077	T cell differentiation in thymus	28/754	86/18614	2.28993e-18	2.49486e-17	8.85863e-18	ABL1/ADAM17/ATG5/B2M/BCL2/BMP4/CCR6/CCR7/CD28/CTNNB1/ERBB2/FOXJ1/FOXP3/GATA3/GLI2/IL1A/IL1B/IL7R/MAFB/PTPRC/RIPK2/RIPK3/SHH/SOD1/SRF/TP53/WNT1/ZEB1	28
GO:0070301	BP	GO:0070301	cellular response to hydrogen peroxide	28/754	93/18614	2.38082e-17	2.42411e-16	8.60741e-17	ABL1/ANXA1/ARG1/AXL/BECN1/CAT/EDN1/ERN1/HGF/IL10/IL6/KDM6B/MAP1LC3A/MET/MIR21/MIR34A/NFE2L2/PINK1/PRKCD/RELA/RIPK3/SIRPA/SIRT1/SPHK1/SRC/STAT6/TNFAIP3/TXN	28
GO:0070664	BP	GO:0070664	negative regulation of leukocyte proliferation	28/754	96/18614	6.04826e-17	5.93174e-16	2.10621e-16	ARG1/BMP4/BTK/CASP3/CD274/CD80/CD86/CEBPB/CRP/CTLA4/ENPP3/ERBB2/FCGR2B/FOXJ1/FOXP3/GREM1/HLA-DRB1/IDO1/IL10/IL2/IL2RA/IL33/LGALS9/SCGB1A1/SDC4/SFTPD/SHH/TNFAIP3	28
GO:0002275	BP	GO:0002275	myeloid cell activation involved in immune response	28/754	98/18614	1.10227e-16	1.05697e-15	3.75303e-16	ADORA2B/BTK/CCL3/CCR2/CX3CR1/ENPP3/F2RL1/GRP/HMOX1/IFNG/IL13/IL13RA2/IL33/IL4/IL4R/ITGAM/ITGB2/KIT/LGALS9/MYD88/PIK3CD/PIK3CG/PTGDS/PYCARD/SPI1/TICAM1/TNF/TREM2	28
GO:0002062	BP	GO:0002062	chondrocyte differentiation	28/754	113/18614	6.23179e-15	5.08717e-14	1.80633e-14	ACVRL1/AXIN2/BMP2/BMP4/BMPR2/CCN2/CCN4/COL3A1/CTNNB1/EIF2AK3/FGF9/GREM1/HIF1A/HMGA2/LOXL2/MAPK14/PTH/PTPN11/SERPINH1/SMAD3/SMAD7/SNAI2/SOX9/TGFB1/TGFBI/TGFBR1/TGFBR2/WNT7A	28
GO:0046660	BP	GO:0046660	female sex differentiation	28/754	122/18614	5.05576e-14	3.89976e-13	1.38471e-13	A2M/AXL/BAX/BCL2/BCL2L1/CASP3/CEBPB/EREG/ESR1/FGF10/HSPA5/KDR/KIT/KITLG/LEP/MERTK/MMP14/MMP2/NOS3/PDGFRA/PTX3/SIRT1/SMAD4/SOD1/SRC/TP63/VEGFA/WNT5A	28
GO:0045471	BP	GO:0045471	response to ethanol	28/754	126/18614	1.20123e-13	8.92158e-13	3.16783e-13	ADIPOQ/CASP8/CAT/CCL7/CCND1/CD14/CD27/CSF3/CTSK/CYBB/FGFR2/FOS/GATA3/IGF1R/IL13/IL2/KCNMB1/LEP/MYD88/PPARA/PTH/PTK2B/RHOA/S100A8/SOD1/SOD2/TNF/VCAM1	28
GO:0038127	BP	GO:0038127	ERBB signaling pathway	28/754	131/18614	3.36963e-13	2.39163e-12	8.49207e-13	ABL1/ADAM17/AGT/AKT1/AREG/BCAR1/EGF/EGFR/ERBB2/EREG/FASLG/HBEGF/ITGA1/LGMN/MAPK1/MIR21/MIR29A/MMP9/NUP62/PLAUR/PTK2/PTK2B/PTPN11/SOX9/SRC/TGFA/TGFB1/TSG101	28
GO:1900180	BP	GO:1900180	regulation of protein localization to nucleus	28/754	134/18614	6.10247e-13	4.23993e-12	1.50549e-12	AKT1/ANGPT1/BMP4/CDH1/EIF2AK3/F2/GSK3B/HSP90AA1/IFNG/INS/JAK2/LEP/LIF/MAPK14/MAVS/PARP1/PARP9/PIK3R1/PRKCD/PTGS2/SHH/SMAD3/SRC/TERT/TFRC/TGFB1/YAP1/ZC3H12A	28
GO:0007498	BP	GO:0007498	mesoderm development	28/754	137/18614	1.0859e-12	7.39784e-12	2.62679e-12	AXIN1/BMP4/BMP7/BMPR2/BTK/DKK1/FGFR2/HMGA2/ITGB1/ITGB3/JAK2/KDM6B/KLF4/LEF1/MIR145/MIR200C/SHH/SMAD1/SMAD2/SMAD3/SMAD4/SNAI1/SRF/TP63/VEGFA/WNT3A/WNT5A/YAP1	28
GO:0010212	BP	GO:0010212	response to ionizing radiation	28/754	143/18614	3.27259e-12	2.10407e-11	7.47105e-12	ANXA1/BAX/BCL2/BCL2L1/CASP3/CCL7/CCND1/CDKN1A/CXCL10/EGR1/GATA3/HSPA5/IL1A/ITGB6/MAPK14/MDM2/MIR21/MYC/PARP1/PTPRC/SIRT1/SMPD1/SNAI2/SOD2/THBD/TP53/VCAM1/YAP1	28
GO:0010821	BP	GO:0010821	regulation of mitochondrion organization	28/754	151/18614	1.29713e-11	7.86142e-11	2.79139e-11	AKT1/BAX/BBC3/BCL2L1/BID/EP300/GSK3A/GSK3B/GZMB/HGF/HIF1A/HSPA1A/IGF1/KDR/MAPK8/MCU/MMP9/PINK1/PLAUR/PPARG/PPARGC1A/PYCARD/SQSTM1/STAT2/TFRC/TNFSF10/TP53/TREM2	28
GO:0016525	BP	GO:0016525	negative regulation of angiogenesis	28/754	151/18614	1.29713e-11	7.86142e-11	2.79139e-11	AGT/ALOX5/ANGPT2/ANGPT4/CCR2/CTNNB1/CXCL10/FASLG/IL17F/KLF4/MECP2/MIR145/MIR146A/MIR21/MIR29A/MIR29C/MIR34A/NPPB/PF4/PPARG/ROCK1/SERPINE1/SPARC/STAT1/TEK/TGFB2/THBS1/TNF	28
GO:2000181	BP	GO:2000181	negative regulation of blood vessel morphogenesis	28/754	153/18614	1.80223e-11	1.07481e-10	3.8164e-11	AGT/ALOX5/ANGPT2/ANGPT4/CCR2/CTNNB1/CXCL10/FASLG/IL17F/KLF4/MECP2/MIR145/MIR146A/MIR21/MIR29A/MIR29C/MIR34A/NPPB/PF4/PPARG/ROCK1/SERPINE1/SPARC/STAT1/TEK/TGFB2/THBS1/TNF	28
GO:1901343	BP	GO:1901343	negative regulation of vasculature development	28/754	154/18614	2.11969e-11	1.25082e-10	4.44135e-11	AGT/ALOX5/ANGPT2/ANGPT4/CCR2/CTNNB1/CXCL10/FASLG/IL17F/KLF4/MECP2/MIR145/MIR146A/MIR21/MIR29A/MIR29C/MIR34A/NPPB/PF4/PPARG/ROCK1/SERPINE1/SPARC/STAT1/TEK/TGFB2/THBS1/TNF	28
GO:0030178	BP	GO:0030178	negative regulation of Wnt signaling pathway	28/754	174/18614	4.12711e-10	2.07467e-09	7.36664e-10	APC/APOE/AXIN1/AXIN2/BMP2/CAV1/CDH2/CTNNB1/DDIT3/DKK1/EGR1/FGF9/GLI1/GREM1/GSK3A/GSK3B/IGFBP1/IGFBP2/LRP1/MAPK14/MIR29B1/MIR29C/NFATC1/SHH/SNAI2/SOX2/SOX9/WNT5A	28
GO:0030509	BP	GO:0030509	BMP signaling pathway	28/754	176/18614	5.4107e-10	2.68141e-09	9.52102e-10	ABL1/ACVRL1/BMP2/BMP4/BMP7/BMPR2/CDH5/DKK1/EGR1/ENG/GATA6/GREM1/KDR/LEF1/MAPK3/MIR21/PPARG/SMAD1/SMAD2/SMAD4/SMAD7/TGFB1/TGFB2/TGFB3/TRIM33/WNT1/WNT5A/XIAP	28
GO:0051048	BP	GO:0051048	negative regulation of secretion	28/754	180/18614	9.18224e-10	4.43663e-09	1.57534e-09	ACE/ADIPOQ/ANXA1/APOE/CCR2/EDN1/EGF/F2R/F2RL1/FCGR2B/HMOX1/IL11/IL12B/IL13RA2/IL1B/INS/LEP/LGALS9/LIF/MIR146A/MIR29B1/OSM/PTPN11/SNCA/SPI1/TNF/TNFRSF1A/TNFRSF1B	28
GO:0055001	BP	GO:0055001	muscle cell development	28/754	192/18614	4.08267e-09	1.80735e-08	6.41744e-09	ACTA1/ADM/AGT/ATG5/BCL2/BMP4/CFLAR/DNER/EDN1/EDNRA/ENG/GSK3A/HDAC9/IGF1/ITGB1/KRT19/KRT8/LOX/MTOR/PDGFRA/PDGFRB/PPARA/SDC1/SMAD4/SRF/VEGFA/XK/YY1	28
GO:0007163	BP	GO:0007163	establishment or maintenance of cell polarity	28/754	226/18614	1.47249e-07	5.25889e-07	1.8673e-07	ABL1/ACTB/ATN1/CCL19/CCL21/CCL4/CCR7/CDC42/CDH5/FAT1/FGF10/FOXJ1/GATA3/GSK3B/HSP90AA1/IGF1R/ITGB1/PTK2/PTK2B/RAC1/RHOA/ROCK1/SHH/TCIRG1/TEK/WNT5A/WNT7A/WNT7B	28
GO:0098742	BP	GO:0098742	cell-cell adhesion via plasma-membrane adhesion molecules	28/754	278/18614	9.27895e-06	2.5994e-05	9.22984e-06	ADIPOQ/APOA1/BMP2/CD209/CDH1/CDH11/CDH2/CDH5/CEACAM8/CLDN4/CX3CL1/FAT1/ICAM1/IL10/IL1RN/ITGAL/ITGAM/ITGB1/ITGB2/KLF4/MAPK14/PECAM1/SELE/SELL/SELP/TGFB2/TGFBR2/VCAM1	28
GO:2001020	BP	GO:2001020	regulation of response to DNA damage stimulus	28/754	311/18614	7.08246e-05	0.000174108	6.18214e-05	ABL1/ACTB/AXIN2/BCL2/BCL2L1/BID/CASP9/CD44/CXCL12/EGFR/FGF10/FOXM1/HMGA2/HMGB1/MCL1/MDM2/MIF/MUC1/MYC/PARP1/PRKCD/RTEL1/SIRT1/SNAI1/SNAI2/TP53/TWIST1/YY1	28
GO:1990778	BP	GO:1990778	protein localization to cell periphery	28/754	345/18614	0.000401113	0.000883995	0.000313885	ACTB/ADAM10/ADIPOQ/AKT1/AKT2/AR/BCL2L1/BSG/CAV1/CDH1/CDH2/EGFR/EPHB2/ERBB2/IFNG/INS/ITGB1/LGALS3/LRP1/MMP14/PIK3R1/ROCK1/SQSTM1/TGFB1/TNF/TNFRSF1A/TREM2/WNT3A	28
GO:0006644	BP	GO:0006644	phospholipid metabolic process	28/754	375/18614	0.00144923	0.0028657	0.00101754	ABCA3/ANGPTL3/APOA1/BECN1/CSF1R/ENPP2/FGF2/GATA6/ISYNA1/MECP2/NKX2-1/PDGFA/PDGFB/PDGFRB/PIK3CD/PIK3CG/PIK3R1/PLA2G1B/PLA2G4A/PLA2G4C/PLA2G7/PRKCD/PTEN/SMPD1/SNCA/SOCS1/SOCS3/TAFAZZIN	28
GO:0046486	BP	GO:0046486	glycerolipid metabolic process	28/754	385/18614	0.00212812	0.00409818	0.00145516	ABCA3/APOA1/APOE/BECN1/C3/CAT/CAV1/CSF1R/ENPP2/FGF2/MECP2/MIR29B1/PDGFA/PDGFB/PDGFRB/PIK3CD/PIK3CG/PIK3R1/PLA2G1B/PLA2G4A/PLA2G4C/PLA2G7/PTEN/PTPN11/SIRT1/SOCS1/SOCS3/TAFAZZIN	28
GO:0022412	BP	GO:0022412	cellular process involved in reproduction in multicellular organism	28/754	438/18614	0.0119713	0.0200357	0.00711418	AKT1/ANGPT2/BAX/BCL2/BCL2L1/BMP4/CCR6/CD9/CFTR/CTNNB1/EDN1/EDNRA/EREG/FOLR2/FOSL1/GLI1/IGF1/ITGB1/KIT/LGR5/MTOR/PTGDR2/PTGDS/PTK2B/PTX3/SRC/TAFAZZIN/TGFBR1	28
GO:0051656	BP	GO:0051656	establishment of organelle localization	28/754	445/18614	0.0145313	0.0240046	0.00852343	ADORA2B/BECN1/BTK/CDC42/CTNNB1/FGF10/GRP/HIF1A/HMOX1/IFNG/IL13/IL13RA2/IL4/IL4R/ITGB1/KIT/LAMP1/LGALS9/NUP62/PIK3CD/PIK3CG/PINK1/PTGDS/SDC1/SDC4/SNCA/TCIRG1/TSG101	28
GO:0000280	BP	GO:0000280	nuclear division	28/754	450/18614	0.0166157	0.0272789	0.00968605	APC/BECN1/BMP4/BMP7/CD28/CDC42/DUSP1/EDN1/EGF/EREG/HSPA1A/IGF1/IGF2/IL1A/IL1B/INS/LIF/LRP5/MKI67/NUP62/PDGFB/PDGFRB/RHOA/SPHK1/TGFA/TNF/WAPL/WNT5A	28
GO:0005775	CC	GO:0005775	vacuolar lumen	28/756	176/19518	1.99079e-10	3.5145e-09	2.49856e-09	ARG1/BGN/C3/CSF3/CTSB/CTSD/CTSK/CTSL/ELANE/FASLG/GLB1/HSP90AA1/LGMN/LYZ/MAPK1/MPO/NEU1/PDGFRB/PRKCD/PRTN3/PYCARD/RNASE3/SDC1/SDC2/SDC4/SMPD1/TOLLIP/VCAN	28
GO:0008236	MF	GO:0008236	serine-type peptidase activity	28/751	190/18369	3.9224e-09	6.41193e-08	4.39006e-08	ACE/BMP1/CMA1/CTSK/DPP4/ELANE/F10/F2/F3/FAP/FURIN/GZMB/MMP1/MMP10/MMP11/MMP12/MMP13/MMP14/MMP2/MMP3/MMP7/MMP8/MMP9/PLAT/PLAU/PLG/PRTN3/TMPRSS2	28
GO:0017171	MF	GO:0017171	serine hydrolase activity	28/751	194/18369	6.29931e-09	9.34398e-08	6.39755e-08	ACE/BMP1/CMA1/CTSK/DPP4/ELANE/F10/F2/F3/FAP/FURIN/GZMB/MMP1/MMP10/MMP11/MMP12/MMP13/MMP14/MMP2/MMP3/MMP7/MMP8/MMP9/PLAT/PLAU/PLG/PRTN3/TMPRSS2	28
GO:0019207	MF	GO:0019207	kinase regulator activity	28/751	211/18369	4.07145e-08	5.01728e-07	3.43519e-07	ALK/ANGPT4/APC/AREG/BMP2/BMPR2/CCL5/CD40LG/CD79A/CDKN1A/EGF/EGFR/EPO/EREG/F2/GREM1/HBEGF/IGF2/IL2/KRAS/MAP2K1/MAP2K6/PIK3R1/SNCA/SOCS1/SOCS3/TGFA/TREM2	28
GO:0002269	BP	GO:0002269	leukocyte activation involved in inflammatory response	27/754	50/18614	7.1867e-25	1.24599e-23	4.4242e-24	AGER/AIF1/APP/C1QA/C5AR1/CCL3/CX3CL1/CX3CR1/IFNG/IL13/IL33/IL4/IL6/ITGAM/ITGB2/JAK2/JUN/MMP8/MYD88/PTPRC/SNCA/SPHK1/TLR2/TLR3/TLR9/TNF/TREM2	27
GO:0045428	BP	GO:0045428	regulation of nitric oxide biosynthetic process	27/754	62/18614	1.17287e-21	1.66702e-20	5.91919e-21	AGT/AGTR2/AIF1/AKT1/CAV1/CD34/CD47/CX3CR1/EDN1/HSP90AA1/IFNG/IL10/IL1B/JAK2/KLF4/MMP8/PTGS2/PTK2B/PTX3/RAC1/SIRPA/SMAD3/SOD2/TICAM1/TLR4/TNF/ZC3H12A	27
GO:0050918	BP	GO:0050918	positive chemotaxis	27/754	64/18614	3.28756e-21	4.55701e-20	1.61808e-20	AGER/ANGPT1/ANGPT2/BMP4/CCL3/CCL5/CCR4/CX3CL1/CXCL10/CXCL12/CXCL8/F2RL1/F3/FGF10/FGF2/FGF7/HGF/HMGB1/KDR/LGALS3/MET/MIF/PDGFB/S1PR1/SMAD3/VEGFA/WNT5A	27
GO:0080164	BP	GO:0080164	regulation of nitric oxide metabolic process	27/754	65/18614	5.41136e-21	7.37315e-20	2.61802e-20	AGT/AGTR2/AIF1/AKT1/CAV1/CD34/CD47/CX3CR1/EDN1/HSP90AA1/IFNG/IL10/IL1B/JAK2/KLF4/MMP8/PTGS2/PTK2B/PTX3/RAC1/SIRPA/SMAD3/SOD2/TICAM1/TLR4/TNF/ZC3H12A	27
GO:0010517	BP	GO:0010517	regulation of phospholipase activity	27/754	66/18614	8.81231e-21	1.16664e-19	4.14245e-20	ABL1/AGT/AGTR1/ANGPTL3/ANXA1/C5AR1/CCL5/CD86/EDNRA/EGFR/ESR1/FGF2/FGFR1/FGFR2/FLT1/GNA13/ITK/KIT/LPAR1/LRP1/PDGFRA/PDGFRB/PLA2G1B/PTH/SELE/SNCA/TXK	27
GO:0030193	BP	GO:0030193	regulation of blood coagulation	27/754	70/18614	5.61402e-20	7.03322e-19	2.49732e-19	APOE/CAV1/CD34/CD9/EDN1/EPHB2/F2/F2R/F2RL1/F3/FAP/FGB/NFE2L2/NOS3/PDGFA/PDGFB/PDGFRA/PLAT/PLAU/PLAUR/PLG/PRKCD/SERPINE1/THBD/THBS1/UBASH3B/VTN	27
GO:2000379	BP	GO:2000379	positive regulation of reactive oxygen species metabolic process	27/754	70/18614	5.61402e-20	7.03322e-19	2.49732e-19	ACE2/AGT/AGTR1/CDKN1A/CRP/F2/F2RL1/ITGAM/ITGB2/LEP/MAPK14/MMP8/NFE2L2/PDGFB/PDGFRB/PRKCD/PTK2B/RIPK3/SNCA/SOD1/SOD2/TGFB1/TGFBR2/THBS1/TLR4/TP53/ZC3H12A	27
GO:1900046	BP	GO:1900046	regulation of hemostasis	27/754	72/18614	1.34217e-19	1.61986e-18	5.75172e-19	APOE/CAV1/CD34/CD9/EDN1/EPHB2/F2/F2R/F2RL1/F3/FAP/FGB/NFE2L2/NOS3/PDGFA/PDGFB/PDGFRA/PLAT/PLAU/PLAUR/PLG/PRKCD/SERPINE1/THBD/THBS1/UBASH3B/VTN	27
GO:0003170	BP	GO:0003170	heart valve development	27/754	73/18614	2.04963e-19	2.43693e-18	8.65295e-19	APC/AXIN2/BMP2/BMP4/BMPR2/CDH11/DKK1/ELN/GATA3/GSK3B/MDM2/MTOR/NFATC1/NOS3/RHOA/ROCK1/SMAD2/SMAD4/SNAI1/SNAI2/SOX9/TGFB1/TGFB2/TGFBR2/TNFRSF1A/TNFRSF1B/TWIST1	27
GO:0048662	BP	GO:0048662	negative regulation of smooth muscle cell proliferation	27/754	75/18614	4.66916e-19	5.35805e-18	1.90251e-18	ACE2/ADIPOQ/AIF1/APOE/BMP2/BMP4/BMPR2/CDKN1A/GNA13/HMOX1/IFNG/IGFBP3/IGFBP5/IL10/IL12B/IL15/MIR145/MIR34A/NOS3/PPARG/PPARGC1A/PTEN/RHOA/S1PR2/SOD2/TGFB3/TNFAIP3	27
GO:1903201	BP	GO:1903201	regulation of oxidative stress-induced cell death	27/754	79/18614	2.222e-18	2.43031e-17	8.62942e-18	ABL1/AKT1/ATF4/CTNNB1/HGF/HIF1A/HSPB1/IL10/INS/MCL1/MET/MIR21/MIR29B1/MIR34A/MMP3/NFE2L2/NOX1/PARP1/PINK1/SIRT1/SOD1/SOD2/TLR4/TNF/TREM2/TXN/WNT1	27
GO:0010657	BP	GO:0010657	muscle cell apoptotic process	27/754	90/18614	9.83582e-17	9.46402e-16	3.36044e-16	AGT/ATF4/ATG5/BMP7/CDKN2A/CFLAR/CXCR2/EDN1/GATA6/HMOX1/HSP90AA1/IFNG/IGF1/IGF1R/IL12B/JAK2/MIR145/MIR21/MIR34A/NFE2L2/PPARG/PTK2B/SIRT1/SMAD4/SOD2/TP53/ZC3H12A	27
GO:0001910	BP	GO:0001910	regulation of leukocyte mediated cytotoxicity	27/754	95/18614	4.51112e-16	4.07456e-15	1.44678e-15	AGER/ARG1/B2M/CD1A/CD1C/CX3CR1/CXCL6/F2RL1/FCGR2B/HLA-DRA/HLA-DRB1/ICAM1/IL12B/IL21/IL23A/IL7R/ITGAM/KLRB1/LAMP1/LEP/LGALS9/NOS2/P2RX7/PTPRC/RIPK3/SPI1/TGFB1	27
GO:0001657	BP	GO:0001657	ureteric bud development	27/754	97/18614	8.05368e-16	7.13617e-15	2.53388e-15	AGT/AGTR2/BCL2/BMP2/BMP4/BMP7/CAT/CTNNB1/EPCAM/FGF1/FGF2/FGFR2/FOXJ1/GATA3/GREM1/MYC/SDC1/SDC4/SHH/SMAD1/SMAD2/SMAD3/SMAD4/SMAD7/SOX9/VEGFA/WNT1	27
GO:0072163	BP	GO:0072163	mesonephric epithelium development	27/754	98/18614	1.06972e-15	9.40354e-15	3.33896e-15	AGT/AGTR2/BCL2/BMP2/BMP4/BMP7/CAT/CTNNB1/EPCAM/FGF1/FGF2/FGFR2/FOXJ1/GATA3/GREM1/MYC/SDC1/SDC4/SHH/SMAD1/SMAD2/SMAD3/SMAD4/SMAD7/SOX9/VEGFA/WNT1	27
GO:0072164	BP	GO:0072164	mesonephric tubule development	27/754	98/18614	1.06972e-15	9.40354e-15	3.33896e-15	AGT/AGTR2/BCL2/BMP2/BMP4/BMP7/CAT/CTNNB1/EPCAM/FGF1/FGF2/FGFR2/FOXJ1/GATA3/GREM1/MYC/SDC1/SDC4/SHH/SMAD1/SMAD2/SMAD3/SMAD4/SMAD7/SOX9/VEGFA/WNT1	27
GO:2001243	BP	GO:2001243	negative regulation of intrinsic apoptotic signaling pathway	27/754	99/18614	1.4154e-15	1.22507e-14	4.34994e-15	AKT1/BCL2/BCL2L1/BID/CD44/CXCL12/EPO/HIF1A/HSPA1A/HSPB1/INS/MDM2/MIF/MIR21/MMP9/MUC1/NFE2L2/PDX1/PINK1/PLAUR/PTGS2/SIRT1/SNAI1/SNAI2/SOD2/SRC/XBP1	27
GO:0051341	BP	GO:0051341	regulation of oxidoreductase activity	27/754	111/18614	3.11478e-14	2.43614e-13	8.65012e-14	ABL1/AGT/AGTR1/AGTR2/AKT1/APOE/CAV1/EDN1/EGFR/FCER2/HIF1A/IFNG/IL13/IL1A/IL1B/INS/LEP/MIR21/NFKB1/NOD2/PTK2B/RIPK3/S100A1/SIRT3/SNCA/TERT/TNF	27
GO:1905954	BP	GO:1905954	positive regulation of lipid localization	27/754	112/18614	3.94944e-14	3.05904e-13	1.08619e-13	ABCA3/ADIPOQ/APOA1/APOE/C3/CAV1/EDN1/FASLG/IL1A/IL1B/LRP1/MAP2K6/MIF/MIR34A/MSR1/NFKB1/NFKBIA/P2RX7/PLA2G4A/PPARG/PRKCD/RXRA/SIRT1/SPP1/TNFSF11/TREM2/ZC3H12A	27
GO:0002065	BP	GO:0002065	columnar/cuboidal epithelial cell differentiation	27/754	118/18614	1.55035e-13	1.14387e-12	4.06158e-13	ABL1/AKT1/BMP2/BMP4/BMP7/CAV1/CDH2/CEBPB/CTNNB1/FASN/FGF2/FGFR2/GATA6/GSK3A/GSK3B/HIF1A/IL13/IL6ST/KLF4/MIR29B1/PDX1/SERPINE1/SOX9/SRC/TP63/WNT5A/YAP1	27
GO:0043500	BP	GO:0043500	muscle adaptation	27/754	121/18614	2.96809e-13	2.11467e-12	7.50867e-13	ACTA1/AGT/AIF1/BECN1/CFLAR/EDN1/FOXO3/GATA6/GSK3A/HMOX1/IGF1/IGFBP5/IL15/IL1B/IL6ST/MIR145/MIR21/NOS3/PARP1/PPARA/PPARG/ROCK1/SMAD3/SMAD4/TNFRSF1A/TNFRSF1B/YY1	27
GO:0098773	BP	GO:0098773	skin epidermis development	27/754	121/18614	2.96809e-13	2.11467e-12	7.50867e-13	BCL2/CLDN4/CTNNB1/DKK1/EGFR/FGF10/FGF7/FGFR2/FZD3/GATA6/GLI2/IGFBP5/IL18/KLF4/KRT17/LGR5/MET/PDGFA/RELA/SHH/SMAD4/SNAI1/SOX9/TGFB2/TNF/TP63/WNT5A	27
GO:0090100	BP	GO:0090100	positive regulation of transmembrane receptor protein serine/threonine kinase signaling pathway	27/754	122/18614	3.66796e-13	2.59679e-12	9.22055e-13	ACVRL1/ADAM17/AXIN1/BMP2/BMP4/BMP7/BMPR2/CDH5/CREBBP/ENG/EP300/FGF9/GATA6/GDF15/JAK2/KDR/MIR21/PARP1/PPARG/SMAD2/SMAD4/TGFB1/TGFB2/TGFB3/TGFBR1/TGFBR2/THBS1	27
GO:0071901	BP	GO:0071901	negative regulation of protein serine/threonine kinase activity	27/754	123/18614	4.52242e-13	3.16569e-12	1.12406e-12	ABL1/ADIPOQ/AGT/AKT1/APC/APOE/BMP2/BMP4/BMP7/CASP3/CAV1/CDKN1A/CDKN2A/CEBPA/DUSP1/IL1B/IRAK3/LRP5/MIR34A/NUP62/PPARG/PRKCD/PTEN/PYCARD/SIRT1/SMPD1/TNFAIP3	27
GO:0051209	BP	GO:0051209	release of sequestered calcium ion into cytosol	27/754	130/18614	1.84254e-12	1.21391e-11	4.31029e-12	ABL1/ATG5/BAX/CCL19/CCL21/CCL3/CCR5/CCR7/CD19/CX3CL1/CXCL10/CXCL11/CXCL9/DDIT3/F2/F2R/FASLG/FGF2/IL13/ITGB3/LCK/P2RX7/PTK2B/PTPRC/SNCA/THY1/UBASH3B	27
GO:0051283	BP	GO:0051283	negative regulation of sequestering of calcium ion	27/754	131/18614	2.23341e-12	1.46282e-11	5.19411e-12	ABL1/ATG5/BAX/CCL19/CCL21/CCL3/CCR5/CCR7/CD19/CX3CL1/CXCL10/CXCL11/CXCL9/DDIT3/F2/F2R/FASLG/FGF2/IL13/ITGB3/LCK/P2RX7/PTK2B/PTPRC/SNCA/THY1/UBASH3B	27
GO:0051282	BP	GO:0051282	regulation of sequestering of calcium ion	27/754	133/18614	3.26233e-12	2.09989e-11	7.45619e-12	ABL1/ATG5/BAX/CCL19/CCL21/CCL3/CCR5/CCR7/CD19/CX3CL1/CXCL10/CXCL11/CXCL9/DDIT3/F2/F2R/FASLG/FGF2/IL13/ITGB3/LCK/P2RX7/PTK2B/PTPRC/SNCA/THY1/UBASH3B	27
GO:0051208	BP	GO:0051208	sequestering of calcium ion	27/754	137/18614	6.80549e-12	4.24396e-11	1.50692e-11	ABL1/ATG5/BAX/CCL19/CCL21/CCL3/CCR5/CCR7/CD19/CX3CL1/CXCL10/CXCL11/CXCL9/DDIT3/F2/F2R/FASLG/FGF2/IL13/ITGB3/LCK/P2RX7/PTK2B/PTPRC/SNCA/THY1/UBASH3B	27
GO:0001889	BP	GO:0001889	liver development	27/754	142/18614	1.63964e-11	9.8308e-11	3.49067e-11	ANXA1/ARG1/CCND1/CEBPA/CEBPB/CFLAR/FGF1/GATA6/GLI1/HGF/HMOX1/IL10/IL6/JUN/MET/PDX1/RELA/SMAD3/SOD2/SOX9/TGFA/TNF/TNFAIP3/VTN/WNT1/WNT3A/XBP1	27
GO:0014074	BP	GO:0014074	response to purine-containing compound	27/754	143/18614	1.9451e-11	1.1551e-10	4.10147e-11	ADIPOQ/ADORA2A/AHR/APP/AREG/BSG/CFTR/COL1A1/CREB1/FOS/FOSL1/GATA6/HSPA5/IGFBP5/IL1B/NT5E/P2RX7/PIK3CG/PLAT/PTGS2/PTK2B/REN/SDC1/SOD1/STAT1/THBD/TLR7	27
GO:0061008	BP	GO:0061008	hepaticobiliary system development	27/754	145/18614	2.72421e-11	1.57925e-10	5.60753e-11	ANXA1/ARG1/CCND1/CEBPA/CEBPB/CFLAR/FGF1/GATA6/GLI1/HGF/HMOX1/IL10/IL6/JUN/MET/PDX1/RELA/SMAD3/SOD2/SOX9/TGFA/TNF/TNFAIP3/VTN/WNT1/WNT3A/XBP1	27
GO:0010508	BP	GO:0010508	positive regulation of autophagy	27/754	146/18614	3.21636e-11	1.83418e-10	6.51271e-11	ATF6/BECN1/FOXO3/GSK3A/GSK3B/HIF1A/HMGB1/HMOX1/IFNB1/IFNG/IL4/KDR/MAP3K7/MAPK3/NOD2/PINK1/PRKAA2/RIPK2/ROCK1/SIRT1/STING1/TBK1/TFEB/TICAM1/TLR9/TRIM21/ZC3H12A	27
GO:0006606	BP	GO:0006606	protein import into nucleus	27/754	163/18614	4.35127e-10	2.18539e-09	7.75979e-10	AGT/AKT1/ANGPT1/BMP4/CDH1/CDKN1A/FGF9/HSP90AA1/IFNG/IL33/JAK2/LEP/MAPK14/MAVS/MMP12/NFKBIA/NUP62/PIK3R1/PRKCD/PTGS2/SHH/SMAD3/SQSTM1/STAT3/TGFB1/TP53/ZC3H12A	27
GO:0048639	BP	GO:0048639	positive regulation of developmental growth	27/754	165/18614	5.76758e-10	2.84568e-09	1.01043e-09	AKT1/BCL2/BMPR2/CREB1/CSF1/CXCL12/CXCR4/EDN1/FGF2/FGF9/FGFR2/FN1/GATA6/GLI1/IGF1/IGF2/IL7/LEP/MAPK14/NGF/SEMA7A/SMAD7/SRF/TGFBR2/VEGFA/WNT3A/YAP1	27
GO:0051170	BP	GO:0051170	import into nucleus	27/754	168/18614	8.72452e-10	4.22276e-09	1.4994e-09	AGT/AKT1/ANGPT1/BMP4/CDH1/CDKN1A/FGF9/HSP90AA1/IFNG/IL33/JAK2/LEP/MAPK14/MAVS/MMP12/NFKBIA/NUP62/PIK3R1/PRKCD/PTGS2/SHH/SMAD3/SQSTM1/STAT3/TGFB1/TP53/ZC3H12A	27
GO:0034767	BP	GO:0034767	positive regulation of monoatomic ion transmembrane transport	27/754	175/18614	2.20415e-09	1.00597e-08	3.57195e-09	ABL1/BAX/CAV1/CCL2/CCR2/CD19/CFTR/CX3CL1/CXCL10/CXCL11/CXCL9/EDN1/EDNRA/EPHB2/F2/F2R/IFNG/IL13/KCNMB1/MIR21/MS4A1/P2RX7/PINK1/PLA2G1B/SNCA/THY1/TREM2	27
GO:1905475	BP	GO:1905475	regulation of protein localization to membrane	27/754	175/18614	2.20415e-09	1.00597e-08	3.57195e-09	ACTB/ADAM10/AKT1/AKT2/AR/BBC3/BCL2L1/CDH2/EGFR/EPHB2/ERBB2/GZMB/IFNG/INS/ITGAM/ITGB1/ITGB2/LGALS3/LRP1/MAPK8/MMP14/PIK3R1/SQSTM1/TGFB1/TNF/TREM2/WNT3A	27
GO:0048469	BP	GO:0048469	cell maturation	27/754	184/18614	6.73913e-09	2.88967e-08	1.02605e-08	APP/AXL/BCL2/BTK/C1QA/C3/CCL19/CCL21/CCR6/CEBPA/CFTR/CTNNB1/CX3CL1/EDN1/EDNRA/EPO/EREG/GATA3/HIF1A/IL15/IL21/KDR/MECP2/PPARG/PTK2B/REN/VEGFA	27
GO:1903169	BP	GO:1903169	regulation of calcium ion transmembrane transport	27/754	186/18614	8.54873e-09	3.59946e-08	1.27808e-08	ABL1/ATG5/BAX/BCL2/CAV1/CD19/CX3CL1/CXCL10/CXCL11/CXCL9/EPO/F2/F2R/IL13/ITGB3/MIR200C/MIR21/MS4A1/P2RX7/PIK3CG/PLA2G1B/PTK2B/RRAD/SNCA/THY1/TLR9/UBASH3B	27
GO:0006006	BP	GO:0006006	glucose metabolic process	27/754	187/18614	9.61518e-09	4.0273e-08	1.42999e-08	ADIPOQ/AKT1/AKT2/ATF3/ATF4/EP300/GAPDH/GPT/GSK3A/IGF1/IGF2/IGFBP3/INS/LEP/LRP5/MAPK14/NR3C1/PDX1/PGM1/PPARA/PPARGC1A/PTH/RORC/SIRT1/SRC/TNF/TP53	27
GO:0009749	BP	GO:0009749	response to glucose	27/754	194/18614	2.13647e-08	8.43739e-08	2.99591e-08	ACE/ADIPOQ/AGER/ANGPT2/CASP3/CCN2/CFTR/CMA1/EGR1/ERN1/HIF1A/HLA-DRB1/IGF1R/LRP5/MIR146A/NOX4/PDX1/PRKAA2/PTK2B/RHOA/SMAD2/SMAD4/SRF/TGFBR2/THBS1/TREM2/XBP1	27
GO:0090087	BP	GO:0090087	regulation of peptide transport	27/754	197/18614	2.97046e-08	1.15759e-07	4.11032e-08	ALOX5/CA2/CCL5/CD38/CFTR/F2/F2RL1/FGB/GRP/HIF1A/HLA-DRB1/IFNG/IL1B/IL6/INS/JAK2/LEP/LRP5/MCU/NOS2/PDX1/PTPN11/S100A8/SYT7/TCIRG1/TNF/TNFSF11	27
GO:0071897	BP	GO:0071897	DNA biosynthetic process	27/754	198/18614	3.31004e-08	1.27572e-07	4.52977e-08	ACVRL1/ADIPOQ/BMPR2/CCN2/CDKN1A/CTNNB1/FGF2/GREM1/HGF/HSP90AA1/KLF4/LOX/MAP2K7/MAPK1/MAPK3/MYC/NOX4/PDGFB/PDGFRB/PTK2B/SIRT1/SPHK1/SRC/TERC/TERT/TNF/TP53	27
GO:0048167	BP	GO:0048167	regulation of synaptic plasticity	27/754	209/18614	1.03519e-07	3.77413e-07	1.3401e-07	ABL1/ACE/ADORA2A/AGER/AGT/APOE/APP/ATF4/CD38/CX3CL1/CX3CR1/EPHB2/GSK3B/INS/KIT/KRAS/LGMN/MAPK1/MECP2/PLAT/PTGS2/PTK2B/S100B/SNCA/SQSTM1/SRF/SYT7	27
GO:0071383	BP	GO:0071383	cellular response to steroid hormone stimulus	27/754	209/18614	1.03519e-07	3.77413e-07	1.3401e-07	ACE/ANXA1/AR/ARG1/AXIN2/BMP4/BMP7/CASP9/CFLAR/EDN1/EP300/ESR1/FLT3/GSK3A/HSPA1A/IGF1R/JAK2/NR3C1/PARP1/PLAT/PPARA/RHOA/RXRA/SIRT1/SRC/TP63/YAP1	27
GO:0050807	BP	GO:0050807	regulation of synapse organization	27/754	234/18614	1.01982e-06	3.24859e-06	1.15349e-06	ABL1/ADAM10/AKT1/APOE/APP/CDC42/CDH2/CTNNB1/DKK1/EPHB2/FCGR2B/IL10/IL10RA/INS/ITGB1/MAPK14/PTEN/PTK2B/RHOA/ROCK1/SNCA/TLR2/TNF/TREM2/WNT3A/WNT5A/WNT7A	27
GO:0050803	BP	GO:0050803	regulation of synapse structure or activity	27/754	240/18614	1.67186e-06	5.18118e-06	1.83971e-06	ABL1/ADAM10/AKT1/APOE/APP/CDC42/CDH2/CTNNB1/DKK1/EPHB2/FCGR2B/IL10/IL10RA/INS/ITGB1/MAPK14/PTEN/PTK2B/RHOA/ROCK1/SNCA/TLR2/TNF/TREM2/WNT3A/WNT5A/WNT7A	27
GO:0051258	BP	GO:0051258	protein polymerization	27/754	276/18614	2.25313e-05	6.01122e-05	2.13443e-05	ABL1/AIF1/CCL11/CCL21/CCL24/CCL26/CCR7/CDH5/CSF3/ELN/FGB/HSP90AA1/HSPA1A/JAK2/KRT5/MECP2/MET/MTOR/OCLN/PINK1/PRKCD/PTK2B/PYCARD/RAC1/RHOA/SNCA/VTN	27
GO:0044843	BP	GO:0044843	cell cycle G1/S phase transition	27/754	281/18614	3.09605e-05	8.04169e-05	2.8554e-05	ACTB/ADAM17/AIF1/AKT1/ANXA1/APC/BCL2/BID/CCL2/CCND1/CDKN1A/CDKN2A/EGFR/FGF10/GLI1/ITGB1/KLF4/MDM2/MIR29A/MIR29B1/MIR29C/MUC1/MYC/PTEN/SOX2/TERT/TP53	27
GO:0051056	BP	GO:0051056	regulation of small GTPase mediated signal transduction	27/754	298/18614	8.52179e-05	0.000206499	7.33228e-05	ABL1/APOA1/APOE/COL3A1/CSF1/EPHB2/EPO/F2R/F2RL1/FGF10/FOXM1/GNA13/IGF1/ITGAV/ITGB1/KITLG/KRAS/LPAR1/MET/NGF/NUP62/PDGFRB/PIK3CG/RAC1/SQSTM1/SRC/TGFB2	27
GO:0006066	BP	GO:0006066	alcohol metabolic process	27/754	366/18614	0.00207317	0.00399372	0.00141807	ANGPTL3/APOA1/APOE/APP/BMP2/CAT/CEBPA/CFTR/FGF1/FGF2/IGF1/IL4/ISYNA1/LEP/LRP5/MECP2/NFKB1/PLA2G4A/PRKAA2/PTEN/PTH/PTK2B/SMPD1/SNCA/SOD1/SPHK1/STAR	27
GO:0034655	BP	GO:0034655	nucleobase-containing compound catabolic process	27/754	447/18614	0.0257526	0.0406009	0.0144164	AICDA/AKT1/AXIN2/BAX/ENPP3/ERN1/FASTK/GSK3A/HPRT1/HSPA1A/IL6/MAPK14/MAPKAPK2/MIR146A/MYD88/NT5E/PDE4A/PRKCD/RNASE3/ROCK1/SCGB1A1/SSB/TNFRSF1B/VIM/ZC3H12A/ZC3H4/ZHX2	27
GO:0005796	CC	GO:0005796	Golgi lumen	27/756	106/19518	3.10888e-15	9.51317e-14	6.76317e-14	APP/BGN/F10/F2/FURIN/INS/MMP11/MMP14/MUC1/MUC16/MUC5AC/MUC5B/NGF/PDGFA/PDGFB/SDC1/SDC2/SDC4/SOD3/TGFB1/VCAN/VTN/WNT1/WNT3A/WNT5A/WNT7A/WNT7B	27
GO:0101002	CC	GO:0101002	ficolin-1-rich granule	27/756	185/19518	2.97159e-09	4.7033e-08	3.34371e-08	ALOX5/CAT/CST3/CTSB/CTSD/FCN1/FPR1/GLB1/GSDMD/HMGB1/HSP90AA1/HSPA1A/ITGAX/ITGB2/LAMP1/LGALS3/MAPK1/MAPK14/MIF/MMP9/PGM1/RAC1/RHOA/SERPINA1/SIRPA/TCIRG1/TIMP2	27
GO:0009925	CC	GO:0009925	basal plasma membrane	27/756	266/19518	5.20079e-06	4.49709e-05	3.19711e-05	ACE/ANXA1/AQP5/BSG/C5AR1/CD34/CD38/CD44/CDH2/CLDN4/CTNNB1/EGFR/EPCAM/ERBB2/HSP90AA1/LRP1/MET/NOD2/PDGFB/PDPN/SLC2A1/TEK/TF/TFRC/TGFA/TJP1/TLR9	27
GO:0004252	MF	GO:0004252	serine-type endopeptidase activity	27/751	170/18369	1.39208e-09	2.42403e-08	1.65966e-08	BMP1/CMA1/CTSK/DPP4/ELANE/F10/F2/F3/FAP/FURIN/GZMB/MMP1/MMP10/MMP11/MMP12/MMP13/MMP14/MMP2/MMP3/MMP7/MMP8/MMP9/PLAT/PLAU/PLG/PRTN3/TMPRSS2	27
GO:0001774	BP	GO:0001774	microglial cell activation	26/754	47/18614	2.30231e-24	3.87176e-23	1.37477e-23	AGER/AIF1/APP/C1QA/C5AR1/CCL3/CX3CL1/CX3CR1/IFNG/IL13/IL33/IL4/IL6/ITGAM/ITGB2/JAK2/JUN/MMP8/PTPRC/SNCA/SPHK1/TLR2/TLR3/TLR9/TNF/TREM2	26
GO:0030888	BP	GO:0030888	regulation of B cell proliferation	26/754	65/18614	9.20653e-20	1.12324e-18	3.98834e-19	AHR/BCL2/BTK/CASP3/CD38/CD40/CDKN1A/CTLA4/EPHB2/FCGR2B/IL10/IL13/IL2/IL21/IL4/IL5/IL7/MIF/MZB1/PTPRC/TFRC/TICAM1/TLR4/TLR9/TNFSF13B/WNT3A	26
GO:0061180	BP	GO:0061180	mammary gland epithelium development	26/754	68/18614	3.5814e-19	4.16961e-18	1.48053e-18	AKT1/AKT2/AR/AREG/BAX/CCL11/CCND1/CEBPB/CSF1/CSF1R/ESR1/FGF10/FGF2/FGFR2/GATA3/HIF1A/IRF6/JAK2/LRP5/MAPK1/NR3C1/SRC/STAT6/TNFSF11/WNT5A/WNT7B	26
GO:0043536	BP	GO:0043536	positive regulation of blood vessel endothelial cell migration	26/754	75/18614	6.32321e-18	6.66854e-17	2.36783e-17	ABL1/ADAM17/AKT1/ANGPT1/ANGPT4/ANXA1/CD40/FGF2/FGFR1/HDAC9/HIF1A/HMGB1/HMOX1/HSPB1/KDR/MIR126/MIR146A/NFE2L2/NOS3/PDGFB/PTGS2/SIRT1/STAT5A/TGFB1/THBS1/VEGFA	26
GO:0002437	BP	GO:0002437	inflammatory response to antigenic stimulus	26/754	78/18614	1.93964e-17	1.99668e-16	7.08973e-17	A2M/BTK/C3/CCR7/CD28/CD68/CXCR2/ELANE/FCGR1A/FCGR2B/FCGR3A/FURIN/GATA3/HLA-DRB1/HMGB1/IL10/IL12B/IL1RN/IL25/IL2RA/IL37/MAPK14/NOD2/SRC/TNF/TREM2	26
GO:0070227	BP	GO:0070227	lymphocyte apoptotic process	26/754	80/18614	3.96631e-17	3.94517e-16	1.40083e-16	AKT1/BAX/BCL2/BMP4/BTK/CASP7/CCL5/CD27/CD274/FAS/FASLG/HIF1A/IDO1/IL10/IL2/IL2RA/IL7R/JAK3/LGALS3/LGALS9/MIF/P2RX7/PDCD1/RIPK3/TP53/WNT5A	26
GO:0010660	BP	GO:0010660	regulation of muscle cell apoptotic process	26/754	85/18614	2.1444e-16	2.00479e-15	7.1185e-16	AGT/ATF4/ATG5/BMP7/CDKN2A/CFLAR/CXCR2/EDN1/GATA6/HMOX1/IFNG/IGF1/IGF1R/IL12B/JAK2/MIR145/MIR21/MIR34A/NFE2L2/PPARG/PTK2B/SIRT1/SMAD4/SOD2/TP53/ZC3H12A	26
GO:0008625	BP	GO:0008625	extrinsic apoptotic signaling pathway via death domain receptors	26/754	86/18614	2.95777e-16	2.73777e-15	9.72115e-16	ATF3/BAX/BCL2/BCL2L1/BID/CASP8/CFLAR/FASLG/FGB/GSK3B/HGF/HMOX1/ICAM1/LGALS3/NGF/NOS3/PIK3R1/PTEN/SERPINE1/SPI1/THBS1/TIMP3/TNF/TNFAIP3/TNFRSF10B/TNFRSF1A	26
GO:0033627	BP	GO:0033627	cell adhesion mediated by integrin	26/754	87/18614	4.05943e-16	3.69039e-15	1.31037e-15	ADAM17/CCL21/CCL5/CXCL13/DPP4/ITGA1/ITGAE/ITGAL/ITGAM/ITGAV/ITGAX/ITGB1/ITGB2/ITGB3/ITGB6/LIF/MMRN1/MUC1/PIK3CG/PLAU/PTK2/PTPN11/SERPINE1/SNAI2/TGFB2/VTN	26
GO:0046849	BP	GO:0046849	bone remodeling	26/754	88/18614	5.54456e-16	4.97589e-15	1.76681e-15	CALCA/CD38/CSF1R/CTNNB1/CTSK/GREM1/IL6/IL7/ITGB3/LEP/LRP5/NOX4/P2RX7/PTH/PTK2B/S1PR1/SPP1/SRC/SYT7/TCIRG1/TF/TFRC/TNFAIP3/TNFSF11/TRAF6/UBASH3B	26
GO:0002312	BP	GO:0002312	B cell activation involved in immune response	26/754	89/18614	7.53751e-16	6.70001e-15	2.37901e-15	ABL1/AICDA/CCR6/CD19/CD28/CD40/CD40LG/FCGR2B/FOXP3/IFNB1/IL10/IL2/IL21/IL4/IL6/IRF8/LGALS1/PTK2B/PTPRC/SPI1/STAT6/TBX21/TFRC/TGFB1/TLR4/XBP1	26
GO:0045807	BP	GO:0045807	positive regulation of endocytosis	26/754	96/18614	5.72694e-15	4.68873e-14	1.66485e-14	ANGPT1/APOE/AXL/B2M/C3/CCL19/CCL21/CD14/CD63/CDC42/EGF/F2RL1/GREM1/IL4/LRP1/SELE/SERPINE1/SMPD1/SNCA/TF/TREM2/TSG101/VEGFA/VTN/WNT3A/WNT5A	26
GO:0008630	BP	GO:0008630	intrinsic apoptotic signaling pathway in response to DNA damage	26/754	103/18614	3.60579e-14	2.81232e-13	9.98585e-14	ABL1/BAX/BCL2/BCL2A1/BCL2L1/BID/CASP9/CD44/CDKN1A/CXCL12/EP300/HMOX1/MCL1/MIF/MUC1/PIK3R1/PYCARD/SIRT1/SNAI1/SNAI2/SOD2/TNF/TNFRSF1A/TNFRSF1B/TP53/TP63	26
GO:0090398	BP	GO:0090398	cellular senescence	26/754	108/18614	1.21564e-13	9.01664e-13	3.20159e-13	ABL1/B2M/CDKN1A/CDKN2A/HMGA2/IGF1R/MAP2K1/MAP2K6/MAP2K7/MAPK14/MAPK8/MIF/MIR146A/MIR34A/NUP62/PRKCD/PTEN/SIRT1/SPI1/SRF/TERC/TERT/TP53/TP63/TWIST1/WNT1	26
GO:0007173	BP	GO:0007173	epidermal growth factor receptor signaling pathway	26/754	114/18614	4.75087e-13	3.32145e-12	1.17937e-12	ABL1/ADAM17/AGT/AKT1/AREG/BCAR1/EGF/EGFR/ERBB2/EREG/FASLG/HBEGF/ITGA1/MIR21/MIR29A/MMP9/NUP62/PLAUR/PTK2/PTK2B/PTPN11/SOX9/SRC/TGFA/TGFB1/TSG101	26
GO:0072009	BP	GO:0072009	nephron epithelium development	26/754	116/18614	7.3271e-13	5.05318e-12	1.79426e-12	ADIPOQ/AGT/AGTR2/BCL2/BMP2/BMP4/CD34/CTNNB1/EDNRA/FGF1/FGF2/FOXJ1/GATA3/GREM1/LIF/MYC/PECAM1/PROM1/SHH/SMAD4/SOX9/STAT1/VEGFA/WNT1/WNT7B/YAP1	26
GO:0072089	BP	GO:0072089	stem cell proliferation	26/754	121/18614	2.07466e-12	1.36043e-11	4.83056e-12	ACE/AXIN2/CD34/CEBPA/CTNNB1/EPCAM/FGF10/FGF2/FGF9/HMGA2/IRF6/KDR/KITLG/MIR29B1/PTPRC/SHH/SNAI2/SOX9/TERT/TGFBR2/TP53/TP63/WNT1/WNT5A/WNT7B/YAP1	26
GO:0046683	BP	GO:0046683	response to organophosphorus	26/754	129/18614	9.78196e-12	5.99989e-11	2.13041e-11	ADIPOQ/AHR/APP/AREG/BSG/CFTR/COL1A1/FOS/FOSL1/GATA6/HSPA5/IGFBP5/IL1B/LPAR1/NT5E/P2RX7/PIK3CG/PLAT/PTGS2/PTK2B/REN/SDC1/SOD1/STAT1/THBD/TLR7	26
GO:0051928	BP	GO:0051928	positive regulation of calcium ion transport	26/754	129/18614	9.78196e-12	5.99989e-11	2.13041e-11	ABL1/BAX/CAV1/CCL2/CCL3/CCL4/CCL5/CCR1/CD19/CX3CL1/CXCL10/CXCL11/CXCL12/CXCL9/F2/F2R/IL13/JAK3/LGALS3/MS4A1/P2RX7/PDGFB/PDGFRB/PLA2G1B/SNCA/THY1	26
GO:0043467	BP	GO:0043467	regulation of generation of precursor metabolites and energy	26/754	135/18614	2.88194e-11	1.6638e-10	5.90775e-11	AKT1/AKT2/APP/EP300/GSK3A/GSK3B/HIF1A/IFNAR1/IFNG/IGF1/IGF2/IL4/INS/MTOR/NOS2/P2RX7/PINK1/PPARA/PPARGC1A/PRKAA2/PTH/RHOA/SNCA/STAT3/TNF/TP53	26
GO:0120161	BP	GO:0120161	regulation of cold-induced thermogenesis	26/754	147/18614	2.08203e-10	1.0917e-09	3.87635e-10	ADAM17/ADIPOQ/APC/ATF4/CAV1/CCR2/CEBPB/CXCR4/DDIT3/FABP4/IGF1R/IL13/IL15/IL18/IL4/IL4R/IRF4/JAK2/KDM6B/LCN2/LEP/MAP2K6/PPARGC1A/STAT6/TLR4/VEGFA	26
GO:0106106	BP	GO:0106106	cold-induced thermogenesis	26/754	148/18614	2.43063e-10	1.26619e-09	4.49591e-10	ADAM17/ADIPOQ/APC/ATF4/CAV1/CCR2/CEBPB/CXCR4/DDIT3/FABP4/IGF1R/IL13/IL15/IL18/IL4/IL4R/IRF4/JAK2/KDM6B/LCN2/LEP/MAP2K6/PPARGC1A/STAT6/TLR4/VEGFA	26
GO:0090316	BP	GO:0090316	positive regulation of intracellular protein transport	26/754	155/18614	6.90991e-10	3.38247e-09	1.20103e-09	AKT2/BBC3/CDH1/ERBB2/GSK3A/GSK3B/GZMB/HPS4/HSP90AA1/IFNG/IL1B/ITGAM/ITGB2/JAK2/LEP/MAPK14/MAPK8/MAVS/PIK3R1/PINK1/PRKCD/PTGS2/SHH/SMAD3/TGFB1/ZC3H12A	26
GO:0007043	BP	GO:0007043	cell-cell junction assembly	26/754	157/18614	9.20343e-10	4.43921e-09	1.57625e-09	ACE/ACE2/ACTB/AGT/APC/CAV1/CD9/CDH1/CDH11/CDH2/CDH5/CLDN4/CTNNB1/EPHB2/IL17A/IL1B/OCLN/PECAM1/RHOA/ROCK1/SMAD7/SNAI1/SNAI2/SRF/TJP1/TNF	26
GO:0030902	BP	GO:0030902	hindbrain development	26/754	157/18614	9.20343e-10	4.43921e-09	1.57625e-09	ABL1/AIF1/BCL2/BMP7/CTNNB1/EGF/EPHB2/FCGR2B/FGF2/GLI1/GLI2/HSPA5/IGF1R/ITGB1/LEF1/LPAR1/MAFB/MAP2K1/MECP2/PLXNA2/PTPN11/SHH/SMAD1/TP53/WNT1/WNT7A	26
GO:1990845	BP	GO:1990845	adaptive thermogenesis	26/754	161/18614	1.60852e-09	7.46215e-09	2.64962e-09	ADAM17/ADIPOQ/APC/ATF4/CAV1/CCR2/CEBPB/CXCR4/DDIT3/FABP4/IGF1R/IL13/IL15/IL18/IL4/IL4R/IRF4/JAK2/KDM6B/LCN2/LEP/MAP2K6/PPARGC1A/STAT6/TLR4/VEGFA	26
GO:0051100	BP	GO:0051100	negative regulation of binding	26/754	163/18614	2.11127e-09	9.68314e-09	3.43824e-09	ACE/ACTB/ADIPOQ/AKT1/B2M/BAX/CAV1/CDKN1A/CFHR1/DDIT3/DKK1/GSK3B/HMGA2/HMOX1/IL10/JAK2/JUN/LEF1/MAPK3/MAPK8/NFKBIA/PDGFB/PPARA/PRKCD/ROCK1/WAPL	26
GO:0048736	BP	GO:0048736	appendage development	26/754	182/18614	2.25679e-08	8.89375e-08	3.15795e-08	BAX/BMP4/BMP7/BMPR2/COL3A1/CREBBP/CTNNB1/DKK1/ECE1/FGF10/FGF9/FGFR2/GREM1/IRF6/LEF1/LRP5/PITX2/PLXNA2/SHH/SMAD4/SOX9/TGFB2/TP63/TWIST1/WNT5A/WNT7A	26
GO:0060173	BP	GO:0060173	limb development	26/754	182/18614	2.25679e-08	8.89375e-08	3.15795e-08	BAX/BMP4/BMP7/BMPR2/COL3A1/CREBBP/CTNNB1/DKK1/ECE1/FGF10/FGF9/FGFR2/GREM1/IRF6/LEF1/LRP5/PITX2/PLXNA2/SHH/SMAD4/SOX9/TGFB2/TP63/TWIST1/WNT5A/WNT7A	26
GO:0002791	BP	GO:0002791	regulation of peptide secretion	26/754	195/18614	9.3974e-08	3.43957e-07	1.22131e-07	ALOX5/CCL5/CD38/CFTR/F2/F2RL1/FGB/GRP/HIF1A/HLA-DRB1/IFNG/IL1B/IL6/INS/JAK2/LEP/LRP5/MCU/NOS2/PDX1/PTPN11/S100A8/SYT7/TCIRG1/TNF/TNFSF11	26
GO:0032388	BP	GO:0032388	positive regulation of intracellular transport	26/754	197/18614	1.15611e-07	4.16347e-07	1.47834e-07	AKT2/BBC3/CDH1/ERBB2/GSK3A/GSK3B/GZMB/HPS4/HSP90AA1/IFNG/IL1B/ITGAM/ITGB2/JAK2/LEP/MAPK14/MAPK8/MAVS/PIK3R1/PINK1/PRKCD/PTGS2/SHH/SMAD3/TGFB1/ZC3H12A	26
GO:1902075	BP	GO:1902075	cellular response to salt	26/754	204/18614	2.33167e-07	8.09006e-07	2.87258e-07	AIF1/B2M/CDH1/CEBPA/COL1A1/EDN1/EGR1/FABP4/FOS/GSK3A/HSPA5/JUN/JUNB/LEP/LGMN/P2RX7/PDGFB/PRKAA2/PTGS2/SHH/SMPD1/SOD1/SYT7/TLR9/WNT5A/ZC3H12A	26
GO:2000241	BP	GO:2000241	regulation of reproductive process	26/754	206/18614	2.83066e-07	9.7071e-07	3.44675e-07	AR/BAX/BCL2L1/BMP4/BMP7/CCR6/CTNNB1/DUSP1/ESR1/FGF9/IGF1/IL1A/ITGB3/KIT/LIF/PLAT/PTGDR2/PTGDS/SHH/SNAI1/SOD1/SOX9/SRC/TIMP1/VEGFA/WNT5A	26
GO:0007623	BP	GO:0007623	circadian rhythm	26/754	207/18614	3.11561e-07	1.06647e-06	3.78676e-07	ADIPOQ/ADORA2A/AHR/ATF4/CLDN4/CREB1/CSF2/EGR1/EP300/GSK3B/LEP/MAPK8/MTOR/NKX2-1/NOS2/PARP1/PPARA/PPARG/PPARGC1A/PRKAA2/PTEN/PTGDS/RORC/SIRT1/TNF/TP53	26
GO:0045732	BP	GO:0045732	positive regulation of protein catabolic process	26/754	209/18614	3.76669e-07	1.27069e-06	4.5119e-07	AKT1/APC/APOE/AXIN1/AXIN2/CAV1/CEBPA/FURIN/GSK3A/GSK3B/HSP90AA1/HSPA1A/IFNG/IL1B/IL33/KEAP1/LRP1/MDM2/NFE2L2/SMAD7/SOX9/TNF/TNFAIP3/TNFRSF1B/TREM2/WNT5A	26
GO:0007411	BP	GO:0007411	axon guidance	26/754	225/18614	1.56676e-06	4.87707e-06	1.73173e-06	APP/B3GNT2/BMP7/BMPR2/CSF1R/CXCL12/ECE1/EDN1/EDNRA/EFNB2/EPHB2/ERBB2/FZD3/GATA3/GLI2/NCAM1/NKX2-1/PLXNA2/PTK2/RAC1/SEMA7A/SHH/SMAD4/VEGFA/WNT3A/WNT5A	26
GO:0097485	BP	GO:0097485	neuron projection guidance	26/754	225/18614	1.56676e-06	4.87707e-06	1.73173e-06	APP/B3GNT2/BMP7/BMPR2/CSF1R/CXCL12/ECE1/EDN1/EDNRA/EFNB2/EPHB2/ERBB2/FZD3/GATA3/GLI2/NCAM1/NKX2-1/PLXNA2/PTK2/RAC1/SEMA7A/SHH/SMAD4/VEGFA/WNT3A/WNT5A	26
GO:0045055	BP	GO:0045055	regulated exocytosis	26/754	228/18614	2.01201e-06	6.15361e-06	2.185e-06	ADORA2B/BTK/CCL3/CCR2/F2RL1/FCGR2B/FCGR3A/GRP/HMOX1/IL13/IL13RA2/IL4/IL4R/ITGAM/ITGB2/KIT/LAMP1/LGALS9/P2RX7/PIK3CD/PIK3CG/PTGDS/SNCA/SPI1/SYT7/WNT7A	26
GO:0009913	BP	GO:0009913	epidermal cell differentiation	26/754	240/18614	5.21009e-06	1.5133e-05	5.37337e-06	ANXA1/BMP4/CASP3/CFLAR/CTNNB1/EREG/FGF2/FOSL2/GATA6/GLI1/IL17A/IL1A/IRF6/KEAP1/KLF4/KRT17/KRT5/MAFB/MAP2K1/PITX2/ROCK1/SOD1/TP63/TSG101/WNT5A/YAP1	26
GO:0042445	BP	GO:0042445	hormone metabolic process	26/754	241/18614	5.62101e-06	1.62928e-05	5.78517e-06	ACE/ACE2/ADAM10/ADM/BMP2/CMA1/CTSB/CTSK/CTSL/DPP4/ECE1/EGR1/ESR1/FURIN/GATA3/HIF1A/IGF1R/LEP/NFKB1/NR3C1/PDGFRA/PLA2G7/PTPN11/REN/SHH/SPP1	26
GO:0140014	BP	GO:0140014	mitotic nuclear division	26/754	286/18614	0.000108429	0.000257946	9.15901e-05	APC/BECN1/BMP4/BMP7/CD28/CDC42/DUSP1/EDN1/EGF/EREG/HSPA1A/IGF1/IGF2/IL1A/IL1B/INS/LRP5/MKI67/NUP62/PDGFB/PDGFRB/RHOA/SPHK1/TGFA/TNF/WAPL	26
GO:0022898	BP	GO:0022898	regulation of transmembrane transporter activity	26/754	289/18614	0.000128453	0.000304417	0.000108091	ACE2/ACTB/APP/BCL2/CAV1/CCL2/CCR2/CFTR/EDN1/EDNRA/EPHB2/EPO/GRP/IFNG/INS/ITGB1/MIR200C/MIR29B1/MMP9/PINK1/PTK2B/RRAD/SNCA/TLR9/TREM2/TWIST1	26
GO:1901990	BP	GO:1901990	regulation of mitotic cell cycle phase transition	26/754	357/18614	0.00295485	0.00557707	0.00198028	ACTB/ADAM17/AIF1/AKT1/ANXA1/APC/APP/BCL2/BID/CCL2/CCND1/CDKN1A/CDKN2A/DUSP1/EGFR/FGF10/KLF4/MDM2/MECP2/MIR29A/MIR29B1/MIR29C/MUC1/PTEN/TERT/TP53	26
GO:0019898	CC	GO:0019898	extrinsic component of membrane	26/756	288/19518	5.92097e-05	0.000418112	0.000297247	AKT1/ANXA1/APC/BECN1/CDH1/CDH11/CDH2/CDH5/CTNNB1/FCN1/GNA13/KRAS/LCK/MUC16/PIK3CD/PIK3CG/PIK3R1/PLAUR/PLG/RAC1/RHOA/SOCS1/SOCS3/SRC/TF/ZC3H12A	26
GO:0031253	CC	GO:0031253	cell projection membrane	26/756	349/19518	0.0011711	0.0059726	0.00424609	ACE/ACE2/ADAM17/ADORA2A/AIF1/AKT2/APC/ATF4/CD44/CTNNB1/DPP4/EGFR/ERBB2/FAP/GNA13/HSP90AA1/ITGAV/ITGB1/ITGB3/PDE4A/PDPN/PROM1/RAC1/RHOA/SRC/THY1	26
GO:0019887	MF	GO:0019887	protein kinase regulator activity	26/751	184/18369	3.40534e-08	4.26199e-07	2.91806e-07	ALK/ANGPT4/APC/AREG/BMP2/BMPR2/CCL5/CD40LG/CD79A/CDKN1A/EGF/EGFR/EPO/EREG/F2/GREM1/HBEGF/IGF2/KRAS/MAP2K1/MAP2K6/PIK3R1/SNCA/SOCS1/SOCS3/TGFA	26
GO:0032735	BP	GO:0032735	positive regulation of interleukin-12 production	25/754	43/18614	3.1937e-24	5.32283e-23	1.89001e-23	AGER/CCL19/CCR7/CD40/CD40LG/HMGB1/IDO1/IFNG/IL12B/IL17A/IL23A/IRF1/IRF5/IRF8/LEP/LGALS9/MAPK14/NOD2/RELA/RIPK2/TLR2/TLR3/TLR4/TLR9/TRAF6	25
GO:0010718	BP	GO:0010718	positive regulation of epithelial to mesenchymal transition	25/754	58/18614	5.14788e-20	6.52221e-19	2.31587e-19	AXIN2/BMP2/BMP4/BMP7/COL1A1/CTNNB1/ENG/IL1B/IL6/LEF1/LOXL2/MIR21/MTOR/PDPN/PTK2/SMAD2/SMAD3/SMAD4/SNAI1/TGFB1/TGFB2/TGFB3/TGFBR1/TGFBR2/TWIST1	25
GO:0032481	BP	GO:0032481	positive regulation of type I interferon production	25/754	62/18614	3.72864e-19	4.32307e-18	1.53501e-18	CD14/CHUK/GAPDH/HSP90AA1/IFIH1/IRF1/IRF3/IRF5/IRF7/ISG15/MAVS/MMP12/MYD88/PTPN11/RIPK2/STAT1/STING1/TBK1/TICAM1/TLR2/TLR3/TLR4/TLR7/TLR8/TLR9	25
GO:0031663	BP	GO:0031663	lipopolysaccharide-mediated signaling pathway	25/754	65/18614	1.46898e-18	1.62254e-17	5.76124e-18	AKT1/CCL2/CCL3/CCL5/CD14/CX3CL1/IL18/IL1B/IRF3/MAPK1/MAPK14/MAPK3/MIF/MYD88/NFKBIA/NOS3/RIPK2/SPI1/TGFB1/TICAM1/TLR2/TLR4/TNF/TNFAIP3/TRAF6	25
GO:0060760	BP	GO:0060760	positive regulation of response to cytokine stimulus	25/754	66/18614	2.27556e-18	2.48404e-17	8.82023e-18	ADAM17/AXL/CASP1/CSF1/CXCR4/EDN1/HIF1A/HSPA1A/IFIH1/IL1R1/IL7/IRF3/IRF7/MAVS/MMP12/PARP9/RIPK2/STING1/TBK1/TLR2/TLR4/TREM2/TSLP/TXK/WNT5A	25
GO:0038034	BP	GO:0038034	signal transduction in absence of ligand	25/754	67/18614	3.49323e-18	3.76919e-17	1.33835e-17	AKT1/BAX/BCL2/BCL2A1/BCL2L1/CSF2/CX3CL1/FAS/FGF10/FGFR1/GSK3A/GSK3B/HSPA1A/IL1A/IL1B/IL2/IL4/IL7/ITGAV/KITLG/MCL1/PF4/SNAI2/TERT/TNF	25
GO:0097192	BP	GO:0097192	extrinsic apoptotic signaling pathway in absence of ligand	25/754	67/18614	3.49323e-18	3.76919e-17	1.33835e-17	AKT1/BAX/BCL2/BCL2A1/BCL2L1/CSF2/CX3CL1/FAS/FGF10/FGFR1/GSK3A/GSK3B/HSPA1A/IL1A/IL1B/IL2/IL4/IL7/ITGAV/KITLG/MCL1/PF4/SNAI2/TERT/TNF	25
GO:2000401	BP	GO:2000401	regulation of lymphocyte migration	25/754	68/18614	5.31596e-18	5.65958e-17	2.00958e-17	ABL1/ADAM10/ADAM17/AIF1/AKT1/APP/CCL2/CCL20/CCL21/CCL3/CCL4/CCL5/CCL7/CCR2/CCR6/CXCL10/CXCL12/CXCL13/ITGB3/PTK2B/PYCARD/RHOA/RIPK3/TNFSF14/WNT5A	25
GO:0046635	BP	GO:0046635	positive regulation of alpha-beta T cell activation	25/754	72/18614	2.6294e-17	2.65309e-16	9.42046e-17	ANXA1/CCL19/CCR2/CD28/CD80/CD86/FOXP3/HLA-DRA/HLA-DRB1/IFNG/IL12B/IL18/IL23A/IL4R/JAK2/LGALS9/MIR21/NLRP3/PTPRC/RHOA/RIPK2/SHH/SOCS1/TGFBR2/TYK2	25
GO:0051145	BP	GO:0051145	smooth muscle cell differentiation	25/754	74/18614	5.59248e-17	5.51371e-16	1.95778e-16	ADM/BMP4/CTNNB1/EDNRA/ENG/EREG/FGF10/FGF9/FGFR2/GATA6/KIT/MECP2/MIR145/MIR21/MIR34A/MRTFA/NFATC1/PDGFB/SHH/SIRT1/SOD2/SOX9/SRF/VEGFA/ZEB1	25
GO:0002534	BP	GO:0002534	cytokine production involved in inflammatory response	25/754	78/18614	2.33619e-16	2.1696e-15	7.70371e-16	ALOX5/EPHB2/F2/HIF1A/IL17A/IL17F/IL17RA/IL1R2/IL6/LEP/MAPK14/MIR146A/MIR21/MYD88/NOD2/NOS2/PPARA/PYCARD/SIRPA/STAT3/TICAM1/TLR4/TNF/TREM2/ZC3H12A	25
GO:1900015	BP	GO:1900015	regulation of cytokine production involved in inflammatory response	25/754	78/18614	2.33619e-16	2.1696e-15	7.70371e-16	ALOX5/EPHB2/F2/HIF1A/IL17A/IL17F/IL17RA/IL1R2/IL6/LEP/MAPK14/MIR146A/MIR21/MYD88/NOD2/NOS2/PPARA/PYCARD/SIRPA/STAT3/TICAM1/TLR4/TNF/TREM2/ZC3H12A	25
GO:0061844	BP	GO:0061844	antimicrobial humoral immune response mediated by antimicrobial peptide	25/754	82/18614	8.87103e-16	7.83561e-15	2.78223e-15	CAMP/CCL13/CXCL1/CXCL10/CXCL11/CXCL13/CXCL14/CXCL2/CXCL3/CXCL5/CXCL6/CXCL8/CXCL9/ELANE/F2/GAPDH/IL17A/IL17F/NOD2/PF4/PLA2G1B/PPBP/RNASE3/S100A12/S100A9	25
GO:1900182	BP	GO:1900182	positive regulation of protein localization to nucleus	25/754	86/18614	3.09571e-15	2.58746e-14	9.18743e-15	AKT1/CDH1/EIF2AK3/F2/HSP90AA1/IFNG/INS/JAK2/LEP/LIF/MAPK14/MAVS/PARP1/PARP9/PIK3R1/PRKCD/PTGS2/SHH/SMAD3/SRC/TERT/TFRC/TGFB1/YAP1/ZC3H12A	25
GO:0001656	BP	GO:0001656	metanephros development	25/754	92/18614	1.7567e-14	1.39145e-13	4.94068e-14	ADIPOQ/AGTR2/BCL2/BMP4/BMP7/CD34/CTNNB1/CXCR2/EGR1/FGF10/FOXJ1/GATA3/GREM1/LIF/MYC/PDGFA/PDGFB/PDGFRA/PDGFRB/SHH/SMAD4/SOX9/STAT1/WNT7B/YAP1	25
GO:0051781	BP	GO:0051781	positive regulation of cell division	25/754	93/18614	2.31203e-14	1.82101e-13	6.46594e-14	CAT/CDC42/CXCR5/EREG/FGF1/FGF2/FGF7/FGF9/FGFR2/IGF1R/IGF2/IL1A/IL1B/NUP62/OSM/PDGFA/PDGFB/PPBP/RHOA/SHH/TGFA/TGFB1/TGFB2/TGFB3/VEGFA	25
GO:0003073	BP	GO:0003073	regulation of systemic arterial blood pressure	25/754	94/18614	3.03105e-14	2.37729e-13	8.44118e-14	ACE/ACE2/ADM/AGT/AGTR1/AGTR2/AR/BMPR2/CALCA/CMA1/ECE1/EDN1/F2R/F2RL1/GSK3A/KL/MECP2/NOS3/NOX1/NPPB/PDGFB/REN/RHOA/SOD2/TNF	25
GO:0048534	BP	GO:0048534	hematopoietic or lymphoid organ development	25/754	96/18614	5.1508e-14	3.9676e-13	1.4088e-13	ABL1/ADAM17/BCL2/CTNNB1/CXCR5/FGF10/GATA3/IL15/IL7R/LRP5/LTBR/MAFB/MAP2K1/MAPK1/MAPK3/PDPN/PITX2/PTPRC/RIPK3/SHH/SOD1/SRF/TGFB1/TGFBR1/TP53	25
GO:0070167	BP	GO:0070167	regulation of biomineral tissue development	25/754	101/18614	1.82256e-13	1.33242e-12	4.73109e-13	ALOX5/ATF4/BMP2/BMP4/BMP7/BMPR2/CCL3/CCR1/CEBPB/CFTR/GREM1/HIF1A/ISG15/KL/NOS3/P2RX7/PTH/PTK2B/ROCK1/RXRA/S1PR1/SMAD3/SOX9/TGFB1/TWIST1	25
GO:0008637	BP	GO:0008637	apoptotic mitochondrial changes	25/754	111/18614	1.80708e-12	1.19335e-11	4.2373e-12	AKT1/BAX/BBC3/BCL2/BCL2A1/BCL2L1/BID/GSK3A/GSK3B/GZMB/HGF/HSPA1A/IGF1/MAPK8/MCL1/MIR29A/MIR29B1/MIR29C/MMP9/PINK1/PLAUR/PYCARD/SOD2/TNFSF10/TP53	25
GO:0010811	BP	GO:0010811	positive regulation of cell-substrate adhesion	25/754	125/18614	2.92709e-11	1.68813e-10	5.99411e-11	ABL1/APOA1/CCL21/CCR7/CDC42/CSF1/CX3CL1/FGB/FN1/FUT1/GSK3B/HAS2/ITGB3/JAK2/KDR/PDGFB/PTK2B/RAC1/ROCK1/SDC4/SMAD3/TEK/THY1/VEGFA/VTN	25
GO:0001101	BP	GO:0001101	response to acid chemical	25/754	136/18614	1.97464e-10	1.03928e-09	3.69024e-10	ARG1/BCL2/BCL2L1/CASP3/CCN2/CEBPB/COL1A1/COL1A2/COL3A1/CYBB/EDN1/EGFR/IGF1R/KRT8/MMP2/MTOR/MYD88/PDGFRA/PDX1/RHOA/SOCS1/TNF/VEGFA/XBP1/ZEB1	25
GO:0090090	BP	GO:0090090	negative regulation of canonical Wnt signaling pathway	25/754	139/18614	3.20567e-10	1.63794e-09	5.8159e-10	APC/APOE/AXIN1/AXIN2/BMP2/CAV1/CDH2/CTNNB1/DDIT3/DKK1/EGR1/GLI1/GREM1/GSK3A/GSK3B/IGFBP1/IGFBP2/MAPK14/MIR29B1/MIR29C/SHH/SNAI2/SOX2/SOX9/WNT5A	25
GO:1903531	BP	GO:1903531	negative regulation of secretion by cell	25/754	156/18614	3.89638e-09	1.73035e-08	6.14405e-09	ADIPOQ/ANXA1/APOE/CCR2/EDN1/F2R/F2RL1/FCGR2B/HMOX1/IL11/IL12B/IL13RA2/IL1B/INS/LEP/LGALS9/LIF/MIR146A/MIR29B1/OSM/PTPN11/SNCA/SPI1/TNFRSF1A/TNFRSF1B	25
GO:0048592	BP	GO:0048592	eye morphogenesis	25/754	157/18614	4.46002e-09	1.96199e-08	6.96654e-09	AQP5/ATF4/BAX/BCL2/BMP4/BMP7/CTNNB1/EPHB2/FASLG/FAT1/FGF2/HIF1A/KDR/LRP5/PITX2/PROM1/SOX9/STAT3/THY1/TWIST1/VEGFA/WNT5A/YY1/ZEB1/ZHX2	25
GO:0051017	BP	GO:0051017	actin filament bundle assembly	25/754	161/18614	7.56684e-09	3.21749e-08	1.14245e-08	ABL1/AIF1/APOA1/CCN2/CD47/CDC42/CX3CL1/ELN/LPAR1/MET/MIR21/MTOR/PIK3R1/PTK2B/RAC1/RHOA/ROCK1/S1PR1/SDC4/SMAD3/SRC/SRF/TGFB3/TGFBR1/TJP1	25
GO:0061572	BP	GO:0061572	actin filament bundle organization	25/754	165/18614	1.26072e-08	5.19121e-08	1.84327e-08	ABL1/AIF1/APOA1/CCN2/CD47/CDC42/CX3CL1/ELN/LPAR1/MET/MIR21/MTOR/PIK3R1/PTK2B/RAC1/RHOA/ROCK1/S1PR1/SDC4/SMAD3/SRC/SRF/TGFB3/TGFBR1/TJP1	25
GO:0060538	BP	GO:0060538	skeletal muscle organ development	25/754	178/18614	5.90927e-08	2.21055e-07	7.84911e-08	ACTA1/ATF3/BCL2/CAV1/CFLAR/CTNNB1/DES/DNER/EGR1/ELN/EP300/FOS/HDAC9/HLF/IGF2/KRAS/MAPK14/MYH14/RHOA/SHH/TAFAZZIN/TGFB1/TWIST1/WNT3A/XK	25
GO:0046578	BP	GO:0046578	regulation of Ras protein signal transduction	25/754	184/18614	1.14274e-07	4.1366e-07	1.4688e-07	ABL1/APOA1/APOE/COL3A1/CSF1/EPHB2/EPO/F2R/F2RL1/FGF10/FOXM1/IGF1/ITGB1/KITLG/KRAS/LPAR1/MET/NGF/NUP62/PDGFRB/PIK3CG/RAC1/SQSTM1/SRC/TGFB2	25
GO:0090276	BP	GO:0090276	regulation of peptide hormone secretion	25/754	192/18614	2.62635e-07	9.03411e-07	3.20779e-07	ALOX5/CCL5/CD38/CFTR/F2/F2RL1/FGB/GRP/HIF1A/HLA-DRB1/IFNG/IL1B/IL6/INS/JAK2/LEP/LRP5/MCU/NOS2/PDX1/PTPN11/SYT7/TCIRG1/TNF/TNFSF11	25
GO:1902806	BP	GO:1902806	regulation of cell cycle G1/S phase transition	25/754	214/18614	2.03034e-06	6.20628e-06	2.2037e-06	ACTB/ADAM17/AIF1/AKT1/ANXA1/APC/BCL2/BID/CCL2/CCND1/CDKN1A/CDKN2A/EGFR/FGF10/GLI1/KLF4/MDM2/MIR29A/MIR29B1/MIR29C/MUC1/PTEN/SOX2/TERT/TP53	25
GO:0000082	BP	GO:0000082	G1/S transition of mitotic cell cycle	25/754	251/18614	3.32632e-05	8.60387e-05	3.05502e-05	ACTB/ADAM17/AIF1/AKT1/ANXA1/APC/BCL2/BID/CCL2/CCND1/CDKN1A/CDKN2A/EGFR/FGF10/ITGB1/KLF4/MDM2/MIR29A/MIR29B1/MIR29C/MUC1/MYC/PTEN/TERT/TP53	25
GO:0009141	BP	GO:0009141	nucleoside triphosphate metabolic process	25/754	269/18614	0.000103037	0.000246849	8.765e-05	APP/CMPK1/ENPP3/EP300/GAPDH/HIF1A/HSPA1A/IFNG/IGF1/IL4/INS/MTOR/NT5E/P2RX7/PARP1/PGM1/PINK1/PPARA/PPARGC1A/PRKAA2/RHOA/STAT3/TAFAZZIN/TGFB1/TREM2	25
GO:0072659	BP	GO:0072659	protein localization to plasma membrane	25/754	285/18614	0.000253906	0.000573336	0.000203577	ACTB/ADIPOQ/AKT1/AKT2/AR/BCL2L1/BSG/CDH1/CDH2/EGFR/EPHB2/IFNG/INS/ITGB1/LGALS3/LRP1/MMP14/PIK3R1/ROCK1/SQSTM1/TGFB1/TNF/TNFRSF1A/TREM2/WNT3A	25
GO:0009100	BP	GO:0009100	glycoprotein metabolic process	25/754	401/18614	0.0222357	0.0355873	0.0126362	APCS/B3GNT2/BCL2/BGN/BMP2/BMPR2/BTK/CCL19/CCL21/CCR7/CST3/CTNNB1/CTSL/FUT1/FUT4/GLB1/HBEGF/HIF1A/IGF1/IL15/IL33/JAK3/LEP/MMP12/PTX3	25
GO:0031093	CC	GO:0031093	platelet alpha granule lumen	25/756	67/19518	1.22597e-18	5.11565e-17	3.63686e-17	A2M/ALB/APP/EGF/FGB/FN1/HGF/IGF1/IGF2/MMRN1/PDGFA/PDGFB/PF4/PLG/PPBP/SERPINA1/SERPINE1/SPARC/TGFB1/TGFB2/TGFB3/THBS1/TIMP1/VEGFA/VWF	25
GO:0044853	CC	GO:0044853	plasma membrane raft	25/756	114/19518	1.29696e-12	3.13317e-11	2.22746e-11	BMPR2/CAV1/CD8A/CDH1/CDH2/CTNNB1/F2R/FASLG/HAS2/HMOX1/IGF1R/ITGAM/ITGB2/JAK2/MAPK1/MAPK3/MS4A1/NOS3/PRTN3/PTGS2/SELE/SLC2A1/SRC/TGFBR2/TREM2	25
GO:0030027	CC	GO:0030027	lamellipodium	25/756	202/19518	3.06342e-07	3.1957e-06	2.27191e-06	ACTA1/ACTA2/ACTB/AIF1/AKT1/ANGPTL3/APC/APP/BCAR1/CD44/CDH1/CDH2/CTNNB1/DPP4/FAP/FAT1/ITGAV/ITGB1/ITGB3/KITLG/PDPN/PTK2B/RAC1/RHOA/ROCK1	25
GO:0106310	MF	GO:0106310	protein serine kinase activity	25/751	363/18369	0.00792764	0.0302383	0.0207033	AKT1/AKT2/EIF2AK3/ERN1/FASTK/GSK3A/GSK3B/MAP2K1/MAP2K6/MAP2K7/MAP3K7/MAPK1/MAPK14/MAPK3/MAPK8/MAPKAPK2/MTOR/PIK3CG/PINK1/PRKAA2/PRKCD/RIPK2/RIPK3/ROCK1/TBK1	25
GO:0032733	BP	GO:0032733	positive regulation of interleukin-10 production	24/754	42/18614	4.72957e-23	7.29631e-22	2.59074e-22	CD274/CD28/CD34/CD40LG/F2RL1/HGF/HMGB1/IL12B/IL13/IL23A/IL4/IL6/IRF4/ISG15/LGALS9/MIR145/NOD2/PYCARD/STAT3/TLR2/TLR4/TLR9/TREM2/TSLP	24
GO:0045622	BP	GO:0045622	regulation of T-helper cell differentiation	24/754	42/18614	4.72957e-23	7.29631e-22	2.59074e-22	ANXA1/CCL19/CD80/CD86/FOXP3/GATA3/HLA-DRA/HLA-DRB1/IL12B/IL18/IL2/IL23A/IL27/IL4/IL4R/IRF4/JAK3/JUNB/MIR21/NLRP3/RIPK2/SMAD7/TBX21/ZC3H12A	24
GO:0042088	BP	GO:0042088	T-helper 1 type immune response	24/754	46/18614	9.04797e-22	1.30927e-20	4.64888e-21	ANXA1/CCL19/CCR2/CD80/HLA-DRB1/HMGB1/IL12B/IL18/IL1B/IL1R1/IL1RL1/IL23A/IL27/IL33/IL4R/JAK3/LEF1/MTOR/PLA2G4A/RIPK2/STAT6/TBX21/TLR4/TRAF6	24
GO:0048146	BP	GO:0048146	positive regulation of fibroblast proliferation	24/754	53/18614	6.82896e-20	8.44198e-19	2.99754e-19	ABL1/AGT/CDKN1A/EGFR/EREG/ESR1/FGF10/FN1/FOSL2/IGF1/IL13/ITGB3/JUN/LIF/MIF/MYC/PDGFA/PDGFB/PDGFRA/PDGFRB/PLA2G1B/SPHK1/WNT1/WNT5A	24
GO:0022617	BP	GO:0022617	extracellular matrix disassembly	24/754	62/18614	6.01479e-18	6.39143e-17	2.26944e-17	ADAM10/CMA1/CST3/CTSK/DPP4/ELANE/FAP/FURIN/IL6/LRP1/MMP1/MMP10/MMP11/MMP12/MMP13/MMP14/MMP2/MMP3/MMP7/MMP8/MMP9/PDPN/PLG/TGFB1	24
GO:1903036	BP	GO:1903036	positive regulation of response to wounding	24/754	76/18614	1.36505e-15	1.18332e-14	4.20169e-15	ANXA1/CCN4/CLDN4/CXCR4/F2/F2R/F3/HBEGF/IGF1R/ITGB1/MIR21/MIR29A/MTOR/NFE2L2/OCLN/PLAT/PLAU/PLG/PTK2/SERPINE1/THBD/THBS1/VTN/XBP1	24
GO:0034340	BP	GO:0034340	response to type I interferon	24/754	83/18614	1.26982e-14	1.01296e-13	3.59677e-14	ADAR/IFI27/IFNA1/IFNA2/IFNAR1/IFNB1/IRF3/IRF7/ISG15/JAK1/MAVS/MIR21/MMP12/MX1/MYD88/PTPN11/SMPD1/STAT1/STAT2/STING1/TBK1/TRAF3/TYK2/WNT5A	24
GO:0001892	BP	GO:0001892	embryonic placenta development	24/754	89/18614	7.0958e-14	5.3698e-13	1.90668e-13	ADM/AKT1/BMP7/CASP8/CEBPA/CEBPB/CSF2/EGFR/FGFR2/HIF1A/IGF2/IL10/JUNB/KRT19/KRT8/LEF1/LIF/MAP2K1/MAPK1/PDGFB/SNAI1/SOCS3/TFEB/WNT7B	24
GO:0032945	BP	GO:0032945	negative regulation of mononuclear cell proliferation	24/754	89/18614	7.0958e-14	5.3698e-13	1.90668e-13	ARG1/BMP4/BTK/CASP3/CD274/CD80/CD86/CEBPB/CRP/CTLA4/ERBB2/FCGR2B/FOXJ1/FOXP3/HLA-DRB1/IDO1/IL10/IL2/IL2RA/LGALS9/SCGB1A1/SDC4/SFTPD/SHH	24
GO:0050829	BP	GO:0050829	defense response to Gram-negative bacterium	24/754	90/18614	9.31175e-14	7.00884e-13	2.48867e-13	CAMP/CD4/CXCL6/DROSHA/ELANE/F2/F2RL1/GSDMD/IL12B/IL17A/IL17F/IL23A/IL6/IL6R/LYZ/NOS2/PYCARD/RNASE3/SELP/SERPINE1/TLR4/TLR9/TREM1/TREM2	24
GO:0060395	BP	GO:0060395	SMAD protein signal transduction	24/754	90/18614	9.31175e-14	7.00884e-13	2.48867e-13	BMP2/BMP4/BMP7/BMPR2/FOS/GDF15/ITGB6/JAK2/JUN/LRP1/MIR146A/PARP1/PPARG/SMAD1/SMAD2/SMAD3/SMAD4/SMAD7/TF/TGFB1/TGFB2/TGFB3/TGFBR1/VIM	24
GO:0032088	BP	GO:0032088	negative regulation of NF-kappaB transcription factor activity	24/754	96/18614	4.38874e-13	3.07982e-12	1.09357e-12	AIM2/BMP7/CAT/CDKN2A/CHUK/DDIT3/FOXJ1/FOXP3/IL10/IRAK3/KLF4/MIR21/NFKBIA/NLRP3/NOD2/PYCARD/SIRT1/SPI1/TLR9/TNFAIP3/TRAF3/TRIM21/TRIM37/ZC3H12A	24
GO:0060840	BP	GO:0060840	artery development	24/754	109/18614	8.43469e-12	5.20775e-11	1.84914e-11	ACVRL1/ANGPTL3/APOE/BMP4/BMPR2/COL3A1/DDIT3/EDN1/EDNRA/EFNB2/ENG/LEP/LOX/LRP1/MIR145/MIR29B1/PDGFRB/SHH/SMAD7/SRF/TGFB2/TGFBR1/TGFBR2/VEGFA	24
GO:0019882	BP	GO:0019882	antigen processing and presentation	24/754	114/18614	2.32574e-11	1.36808e-10	4.85772e-11	ACE/ATG5/B2M/CCL19/CCL21/CCR7/CD1A/CD1C/CD209/CD68/CD8A/CTSD/CTSL/FCGR1A/FCGR2B/HLA-DRA/HLA-DRB1/LGMN/MARCHF8/NOD2/PYCARD/THBS1/TRAF6/TREM2	24
GO:0042303	BP	GO:0042303	molting cycle	24/754	115/18614	2.82853e-11	1.63634e-10	5.81023e-11	BCL2/CTNNB1/DKK1/EGFR/FGF10/FGF7/FGFR2/FZD3/GLI2/IGFBP5/KRT17/LGR5/PDGFA/PTGS2/RELA/SHH/SMAD4/SNAI1/SOX9/TERT/TGFB2/TNF/TP63/WNT5A	24
GO:0042633	BP	GO:0042633	hair cycle	24/754	115/18614	2.82853e-11	1.63634e-10	5.81023e-11	BCL2/CTNNB1/DKK1/EGFR/FGF10/FGF7/FGFR2/FZD3/GLI2/IGFBP5/KRT17/LGR5/PDGFA/PTGS2/RELA/SHH/SMAD4/SNAI1/SOX9/TERT/TGFB2/TNF/TP63/WNT5A	24
GO:0050830	BP	GO:0050830	defense response to Gram-positive bacterium	24/754	118/18614	5.02019e-11	2.81694e-10	1.00023e-10	ADAM17/C5AR1/CAMP/CRP/DROSHA/GSDMD/IL17A/IL17F/IL18/IL1B/IL6/IL7R/LYZ/MYD88/NOD2/P2RX7/PLA2G1B/PYCARD/RIPK2/RNASE3/SPRR2A/TBK1/TLR2/TNF	24
GO:0055007	BP	GO:0055007	cardiac muscle cell differentiation	24/754	127/18614	2.51042e-10	1.30412e-09	4.63059e-10	AGT/ATG5/BMP2/BMP4/DKK1/EDN1/EFNB2/GATA6/GREM1/GSK3A/IGF1/ITGB1/KDM6B/MTOR/NOX4/PDGFRA/PDGFRB/PPARA/SMAD4/SRF/TGFB1/VEGFA/WNT3A/YY1	24
GO:0008286	BP	GO:0008286	insulin receptor signaling pathway	24/754	128/18614	2.97354e-10	1.53473e-09	5.44945e-10	AGT/AKT1/AKT2/APC/BCAR1/CTSD/GSK3A/GSK3B/IGF1R/IGF2/IGFBP1/IL1B/INS/LEP/MAPK1/MAPK3/MZB1/PIK3R1/PRKCD/PTPN11/SIRT1/SOCS1/SOCS3/SRC	24
GO:0034219	BP	GO:0034219	carbohydrate transmembrane transport	24/754	133/18614	6.75361e-10	3.32339e-09	1.18006e-09	ACE/ADIPOQ/AKT1/AKT2/C3/EDN1/EDNRA/GSK3A/IGF1/IL1B/INS/LEP/MAPK14/NFE2L2/OCLN/PIK3R1/PLA2G1B/PPBP/PTH/PTPN11/SLC17A5/SLC2A1/TERT/TNF	24
GO:0051783	BP	GO:0051783	regulation of nuclear division	24/754	145/18614	4.11594e-09	1.82064e-08	6.46463e-09	APC/BMP4/BMP7/CD28/CDC42/DUSP1/EDN1/EGF/EREG/IGF1/IGF2/IL1A/IL1B/INS/LIF/LRP5/MKI67/NUP62/PDGFB/PDGFRB/SPHK1/TGFA/TNF/WNT5A	24
GO:0050714	BP	GO:0050714	positive regulation of protein secretion	24/754	146/18614	4.7405e-09	2.07397e-08	7.36415e-09	ADORA2A/CD38/CFTR/F2/F2RL1/FGB/HIF1A/HLA-DRB1/IGF1/IL13/IL1A/INS/JAK2/MCU/P2RX7/PDX1/PLA2G1B/PPARG/TGFB1/TGFB2/TGFB3/TLR2/TLR4/TREM2	24
GO:0010675	BP	GO:0010675	regulation of cellular carbohydrate metabolic process	24/754	152/18614	1.07663e-08	4.47266e-08	1.58813e-08	ADIPOQ/AKT1/AKT2/EP300/GPT/GSK3A/GSK3B/IGF1/IGF2/IGFBP3/INS/LEP/MTOR/NR3C1/PPARA/PPARGC1A/PTH/PTK2B/RORC/SIRT1/SNCA/SRC/STAT3/TP53	24
GO:0016331	BP	GO:0016331	morphogenesis of embryonic epithelium	24/754	152/18614	1.07663e-08	4.47266e-08	1.58813e-08	ABL1/ADM/AR/BMP4/BMP7/CASP3/CTNNB1/FGF10/FGFR2/FZD3/GATA3/GREM1/HIF1A/PDX1/SDC4/SHH/SOX9/TGFB1/TGFB2/TP63/TRAF6/TWIST1/WNT5A/WNT7B	24
GO:0035148	BP	GO:0035148	tube formation	24/754	154/18614	1.40114e-08	5.71982e-08	2.03097e-08	ABL1/ADM/BMP4/BMP7/CASP3/CTNNB1/EGF/FGF10/FGF2/FGFR2/FZD3/GATA3/GREM1/HIF1A/PIK3CD/SDC4/SHH/SOX9/TGFB1/TGFB2/TRAF6/TWIST1/VEGFA/WNT5A	24
GO:0008643	BP	GO:0008643	carbohydrate transport	24/754	156/18614	1.81481e-08	7.29047e-08	2.58867e-08	ACE/ADIPOQ/AKT1/AKT2/C3/EDN1/EDNRA/GSK3A/IGF1/IL1B/INS/LEP/MAPK14/NFE2L2/OCLN/PIK3R1/PLA2G1B/PPBP/PTH/PTPN11/SLC17A5/SLC2A1/TERT/TNF	24
GO:0007519	BP	GO:0007519	skeletal muscle tissue development	24/754	165/18614	5.49956e-08	2.06141e-07	7.31957e-08	ACTA1/ATF3/BCL2/CAV1/CFLAR/CTNNB1/DNER/EGR1/ELN/EP300/FOS/HDAC9/HLF/IGF2/KRAS/MAPK14/MYH14/RHOA/SHH/TAFAZZIN/TGFB1/TWIST1/WNT3A/XK	24
GO:0003205	BP	GO:0003205	cardiac chamber development	24/754	166/18614	6.18763e-08	2.30851e-07	8.19695e-08	BMP2/BMP4/BMP7/BMPR2/EDNRA/ENG/FGFR2/GATA3/GATA6/GSK3A/HIF1A/IGF1R/MDM2/NOS3/SMAD4/SMAD7/SRF/TEK/TGFB1/TGFB2/TGFBR1/TGFBR2/TP53/WNT5A	24
GO:0015718	BP	GO:0015718	monocarboxylic acid transport	24/754	177/18614	2.12297e-07	7.42887e-07	2.63781e-07	ACE/AKT1/AKT2/ANXA1/APOE/EDN1/FABP4/IL1A/IL1B/LEP/MAP2K6/MIF/NOS2/P2RX7/PLA2G1B/PLA2G4A/PPARA/PPARG/PTGS2/SLC17A5/SLC2A1/THBS1/TNF/TNFSF11	24
GO:0008361	BP	GO:0008361	regulation of cell size	24/754	178/18614	2.36173e-07	8.18928e-07	2.90781e-07	ABL1/APOE/BMPR2/CDH1/CREB1/CXCL12/EDN1/FN1/GSK3B/HSP90AA1/IL7R/MTOR/NGF/P2RX7/PTEN/RAC1/RHOA/SEMA7A/SPP1/SRF/VEGFA/WNT3A/WNT5A/XK	24
GO:0030308	BP	GO:0030308	negative regulation of cell growth	24/754	191/18614	8.75409e-07	2.8239e-06	1.0027e-06	ACVRL1/AGT/AGTR2/BCL2/BMPR2/CDH1/CDKN1A/CDKN2A/GREM1/GSK3A/HSPA1A/NPPB/PPARA/SEMA7A/SIRT1/SMAD3/SMAD4/SPP1/TGFB1/TGFB2/TP53/WNT3A/WNT5A/YY1	24
GO:0017157	BP	GO:0017157	regulation of exocytosis	24/754	194/18614	1.1626e-06	3.68661e-06	1.30902e-06	ADORA2B/ANXA1/CCR2/CFTR/F2RL1/FCGR2B/FGB/HMOX1/IFNG/IL13/IL13RA2/IL4/IL4R/ITGAM/ITGB2/LAMP1/LGALS9/SDC1/SDC4/SNCA/SPI1/SYT7/TSG101/WNT7A	24
GO:0045664	BP	GO:0045664	regulation of neuron differentiation	24/754	194/18614	1.1626e-06	3.68661e-06	1.30902e-06	ALK/APP/B2M/BCL2/BMP2/BMP4/BMP7/CXCL12/DKK1/EPO/FGF2/FGFR1/GSK3B/ITGB1/MIR146A/NGF/RHOA/ROCK1/SHH/SOX2/SOX9/WNT3A/ZEB1/ZHX2	24
GO:0030073	BP	GO:0030073	insulin secretion	24/754	197/18614	1.53401e-06	4.78043e-06	1.69741e-06	ALOX5/ANXA1/CCL5/CD38/CFTR/F2/F2RL1/HIF1A/HLA-DRB1/IFNG/IL1B/IL1RN/IL6/JAK2/LEP/LRP5/MCU/NOS2/PDX1/PTPN11/SMAD2/SYT7/TCIRG1/TNF	24
GO:0060491	BP	GO:0060491	regulation of cell projection assembly	24/754	197/18614	1.53401e-06	4.78043e-06	1.69741e-06	APC/ATG5/CAV1/CCL19/CCL21/CCR7/CDC42/EPHB2/F2RL1/GSK3B/HSP90AA1/KIT/MTOR/OCLN/P2RX7/PIK3R1/PRKCD/RAC1/SRC/SRF/TGFB3/TGFBR1/WNT1/YAP1	24
GO:0006473	BP	GO:0006473	protein acetylation	24/754	208/18614	4.02335e-06	1.18583e-05	4.21058e-06	ACTB/ATG5/CREBBP/EP300/FOXP3/GATA3/GSK3B/IRF4/LEF1/LIF/MAP3K7/MECP2/MIR34A/MUC1/PPARGC1A/PRKAA2/SHH/SIRT1/SMAD4/SNAI2/SNCA/SPHK1/SPI1/TWIST1	24
GO:0008016	BP	GO:0008016	regulation of heart contraction	24/754	213/18614	6.07999e-06	1.73891e-05	6.17445e-06	ACE2/ADM/AGT/AGTR2/CALCA/CAV1/CCN2/DES/EDN1/EDNRA/GSK3A/HBEGF/HSP90AA1/IL2/JAK2/MDM2/MIR200C/NOS3/PIK3CG/S100A1/SMAD7/TGFB2/TNF/ZC3H12A	24
GO:0007188	BP	GO:0007188	adenylate cyclase-modulating G protein-coupled receptor signaling pathway	24/754	234/18614	2.95431e-05	7.69136e-05	2.73101e-05	ADGRE1/ADM/ADORA2A/ADORA2B/CALCA/CCR3/CXCL10/CXCL11/CXCL9/EDN1/EDNRA/FPR1/GNA13/GPHA2/GSK3A/ITGB3/LPAR1/MARCO/PDE4A/PF4/PTGDR2/PTGER2/PTH/S1PR1	24
GO:1901617	BP	GO:1901617	organic hydroxy compound biosynthetic process	24/754	242/18614	5.08864e-05	0.000128536	4.56399e-05	APOE/BMP2/CFTR/FGF1/FGF2/GATA3/IFNG/ISYNA1/KL/LEP/NFKB1/PRKAA2/PTH/PTK2B/SIRT1/SNAI1/SNAI2/SNCA/SOD1/SPHK1/STAR/TGFB2/TNF/WNT5A	24
GO:0009205	BP	GO:0009205	purine ribonucleoside triphosphate metabolic process	24/754	244/18614	5.80296e-05	0.000145204	5.15582e-05	APP/ENPP3/EP300/GAPDH/HIF1A/HSPA1A/IFNG/IGF1/IL4/INS/MTOR/NT5E/P2RX7/PARP1/PGM1/PINK1/PPARA/PPARGC1A/PRKAA2/RHOA/STAT3/TAFAZZIN/TGFB1/TREM2	24
GO:0009144	BP	GO:0009144	purine nucleoside triphosphate metabolic process	24/754	249/18614	7.99719e-05	0.000194292	6.89882e-05	APP/ENPP3/EP300/GAPDH/HIF1A/HSPA1A/IFNG/IGF1/IL4/INS/MTOR/NT5E/P2RX7/PARP1/PGM1/PINK1/PPARA/PPARGC1A/PRKAA2/RHOA/STAT3/TAFAZZIN/TGFB1/TREM2	24
GO:0043543	BP	GO:0043543	protein acylation	24/754	250/18614	8.51603e-05	0.000206449	7.3305e-05	ACTB/ATG5/CREBBP/EP300/FOXP3/GATA3/GSK3B/IRF4/LEF1/LIF/MAP3K7/MECP2/MIR34A/MUC1/PPARGC1A/PRKAA2/SHH/SIRT1/SMAD4/SNAI2/SNCA/SPHK1/SPI1/TWIST1	24
GO:0009199	BP	GO:0009199	ribonucleoside triphosphate metabolic process	24/754	251/18614	9.06472e-05	0.000218992	7.77588e-05	APP/ENPP3/EP300/GAPDH/HIF1A/HSPA1A/IFNG/IGF1/IL4/INS/MTOR/NT5E/P2RX7/PARP1/PGM1/PINK1/PPARA/PPARGC1A/PRKAA2/RHOA/STAT3/TAFAZZIN/TGFB1/TREM2	24
GO:0045334	CC	GO:0045334	clathrin-coated endocytic vesicle	24/756	92/19518	6.08011e-14	1.64163e-12	1.16708e-12	APOE/AREG/CD207/CD4/CD9/CFTR/CTLA4/EGF/EGFR/EREG/FCGR1A/HBEGF/HLA-DRA/HLA-DRB1/IL7R/SFTPA1/SFTPA2/SFTPB/SFTPC/SFTPD/TF/TFRC/TGFA/WNT5A	24
GO:0140272	MF	GO:0140272	exogenous protein binding	24/751	78/18369	3.24532e-15	1.13022e-13	7.73827e-14	ACE2/ALB/ANPEP/AXL/BSG/CCR5/CD209/CD4/CD80/CD86/CXCR4/DPP4/EFNB2/EGFR/HSPA1A/ICAM1/ITGAV/ITGB1/ITGB3/ITGB6/LAMP1/MRC1/NCAM1/TFRC	24
GO:0001221	MF	GO:0001221	transcription coregulator binding	24/751	111/18369	1.54113e-11	3.16524e-10	2.16715e-10	AHR/AR/CREBBP/CTNNB1/EP300/ESR1/FOS/GATA3/GATA6/HIF1A/LEF1/MYC/NFATC1/NFE2L2/PPARA/PPARG/RELA/RXRA/SMAD3/SMAD4/STAT1/STAT6/TERT/TWIST1	24
GO:0019209	MF	GO:0019209	kinase activator activity	24/751	141/18369	2.75921e-09	4.60444e-08	3.15252e-08	ALK/ANGPT4/AREG/BMP2/BMPR2/CCL5/CD40LG/CD79A/CDKN1A/EGF/EGFR/EPO/EREG/F2/GREM1/HBEGF/IGF2/IL2/KRAS/MAP2K1/MAP2K6/PIK3R1/TGFA/TREM2	24
GO:0061082	BP	GO:0061082	myeloid leukocyte cytokine production	23/754	51/18614	4.56025e-19	5.25461e-18	1.86578e-18	AXL/HMOX1/IRAK3/KIT/MAPKAPK2/MAVS/MIF/MYD88/NOD2/P2RX7/PYCARD/RIPK2/SEMA7A/SIRT1/TGFB1/TGFB2/TGFB3/TICAM1/TLR3/TLR4/TLR7/TWIST1/WNT5A	23
GO:0032608	BP	GO:0032608	interferon-beta production	23/754	56/18614	6.05775e-18	6.41275e-17	2.27701e-17	HSP90AA1/IFIH1/IRF1/IRF3/IRF5/IRF7/ISG15/MAVS/PTPN11/PYCARD/RIPK2/SIRPA/STING1/TBK1/TICAM1/TLR2/TLR3/TLR4/TLR7/TLR8/TLR9/TRAF3/YY1	23
GO:0032648	BP	GO:0032648	regulation of interferon-beta production	23/754	56/18614	6.05775e-18	6.41275e-17	2.27701e-17	HSP90AA1/IFIH1/IRF1/IRF3/IRF5/IRF7/ISG15/MAVS/PTPN11/PYCARD/RIPK2/SIRPA/STING1/TBK1/TICAM1/TLR2/TLR3/TLR4/TLR7/TLR8/TLR9/TRAF3/YY1	23
GO:0072132	BP	GO:0072132	mesenchyme morphogenesis	23/754	57/18614	9.77322e-18	1.01918e-16	3.61886e-17	ACTA1/ACTA2/ACVRL1/APC/BMP2/BMP7/ENG/LEF1/MDM2/MYC/NOS3/SMAD2/SMAD3/SMAD4/SNAI1/SNAI2/SOX9/TGFB2/TGFBR1/TGFBR2/TWIST1/WNT3A/WNT5A	23
GO:0034113	BP	GO:0034113	heterotypic cell-cell adhesion	23/754	61/18614	5.92607e-17	5.8221e-16	2.06729e-16	ADIPOQ/AGER/APOA1/BMP7/CD2/CD44/CD47/FGB/IL10/IL1B/IL1RN/ITGAV/ITGAX/ITGB1/ITGB2/ITGB3/KLF4/LCK/PTPRC/SIRPA/THY1/TNF/VCAM1	23
GO:1905517	BP	GO:1905517	macrophage migration	23/754	61/18614	5.92607e-17	5.8221e-16	2.06729e-16	C5AR1/CCL2/CCL3/CCL5/CCR2/CD9/CSF1/CSF1R/CX3CL1/CX3CR1/CXCL17/LGALS3/MAPK1/MAPK3/MIF/MMP14/MMP2/MMP28/PTK2/PTK2B/SFTPD/THBS1/TREM2	23
GO:0043030	BP	GO:0043030	regulation of macrophage activation	23/754	62/18614	9.06621e-17	8.75359e-16	3.10818e-16	CCL3/CEBPA/CX3CL1/FCGR2B/IL10/IL13/IL1RL1/IL33/IL4/IL4R/IL6/MIF/MIR145/MMP8/PLA2G4A/PTPRC/SNCA/SPHK1/THBS1/TLR4/TREM2/WNT5A/ZC3H12A	23
GO:1904036	BP	GO:1904036	negative regulation of epithelial cell apoptotic process	23/754	62/18614	9.06621e-17	8.75359e-16	3.10818e-16	ABL1/ADAR/ANGPT1/BCL2/CDH5/CFLAR/FGB/GATA3/HMOX1/ICAM1/IGF1R/IL13/IL4/KDR/MIR126/NFE2L2/PDX1/PPARA/SERPINE1/TEK/TERT/TNFAIP3/YAP1	23
GO:0072577	BP	GO:0072577	endothelial cell apoptotic process	23/754	65/18614	3.07444e-16	2.84106e-15	1.00879e-15	ABL1/ANGPT1/BMPR2/CCL2/CD40/CD40LG/CDH5/FASLG/FGB/GATA3/ICAM1/IL10/IL13/IL4/KDR/MIR126/NFE2L2/SERPINE1/TEK/TERT/THBS1/TNF/TNFAIP3	23
GO:0060193	BP	GO:0060193	positive regulation of lipase activity	23/754	67/18614	6.65474e-16	5.93416e-15	2.10707e-15	AGT/AGTR1/C5AR1/CCL5/CD86/EDNRA/EGFR/ESR1/FGF2/FGFR1/FGFR2/FLT1/GNA13/ITK/KIT/LPAR1/PDGFRA/PDGFRB/PLA2G1B/PTH/RHOA/SELE/TXK	23
GO:0050766	BP	GO:0050766	positive regulation of phagocytosis	23/754	73/18614	5.66292e-15	4.6431e-14	1.64865e-14	APOA1/BTK/C3/CCL2/CD47/F2RL1/FCGR1A/FCGR2B/FCN1/IFNG/IL15/IL1B/IL2RB/MERTK/NOD2/PTPRC/PTX3/PYCARD/SFTPD/SIRPA/SOD1/TNF/TREM2	23
GO:0061035	BP	GO:0061035	regulation of cartilage development	23/754	73/18614	5.66292e-15	4.6431e-14	1.64865e-14	ACVRL1/AXIN2/BMP1/BMP2/BMP4/BMPR2/CCN2/CCN4/CTNNB1/CTSK/GREM1/LEP/LOXL2/MIR21/PTH/PTPN11/SMAD1/SMAD3/SMAD7/SNAI2/SOX9/TGFBR1/WNT5A	23
GO:0019915	BP	GO:0019915	lipid storage	23/754	86/18614	2.85948e-13	2.0556e-12	7.29892e-13	ANGPTL3/APOA1/APOE/C3/CAV1/CRP/IL1B/IL6/ITGAV/ITGB3/LEP/MIR146A/MIR34A/MSR1/NFKB1/NFKBIA/PLA2G4C/PPARA/PPARG/SIRT1/TNF/TREM2/ZC3H12A	23
GO:0050672	BP	GO:0050672	negative regulation of lymphocyte proliferation	23/754	88/18614	4.87399e-13	3.40329e-12	1.20842e-12	ARG1/BMP4/BTK/CASP3/CD274/CD80/CD86/CEBPB/CTLA4/ERBB2/FCGR2B/FOXJ1/FOXP3/HLA-DRB1/IDO1/IL10/IL2/IL2RA/LGALS9/SCGB1A1/SDC4/SFTPD/SHH	23
GO:0072091	BP	GO:0072091	regulation of stem cell proliferation	23/754	91/18614	1.0531e-12	7.18312e-12	2.55055e-12	ACE/CEBPA/CTNNB1/EPCAM/FGF10/FGF2/FGF9/HMGA2/IRF6/KDR/KITLG/MIR29B1/PTPRC/SHH/SNAI2/SOX9/TERT/TGFBR2/TP53/TP63/WNT1/WNT5A/YAP1	23
GO:0060993	BP	GO:0060993	kidney morphogenesis	23/754	97/18614	4.46304e-12	2.82407e-11	1.00276e-11	AGT/AGTR2/BCL2/BMP2/BMP4/BMP7/CTNNB1/FGF1/FGF10/FGF2/FOXJ1/GATA3/GREM1/LIF/MYC/PDGFRB/SHH/SMAD4/SOX9/STAT1/VEGFA/WNT1/WNT7B	23
GO:0043255	BP	GO:0043255	regulation of carbohydrate biosynthetic process	23/754	101/18614	1.09587e-11	6.68503e-11	2.37369e-11	ADIPOQ/AKT1/AKT2/EGF/EP300/GPT/GSK3A/GSK3B/HAS2/IGF1/IGF2/INS/LEP/NFKB1/NR3C1/PDGFB/PPARA/PPARGC1A/PTH/PTK2B/SIRT1/SNCA/TGFB1	23
GO:0008585	BP	GO:0008585	female gonad development	23/754	102/18614	1.36171e-11	8.24385e-11	2.92719e-11	A2M/BAX/BCL2/BCL2L1/CASP3/CEBPB/EREG/ESR1/HSPA5/KDR/KIT/KITLG/LEP/MMP14/MMP2/NOS3/PDGFRA/PTX3/SIRT1/SMAD4/SOD1/SRC/VEGFA	23
GO:0150115	BP	GO:0150115	cell-substrate junction organization	23/754	103/18614	1.68727e-11	1.01056e-10	3.58824e-11	ABL1/ACVRL1/BCL2/CDH11/FN1/GREM1/ITGB3/KDR/MMP14/PIK3R1/PTEN/PTK2/PTK2B/RAC1/RHOA/ROCK1/SDC4/SMAD3/SRC/TEK/THBS1/THY1/VEGFA	23
GO:0046545	BP	GO:0046545	development of primary female sexual characteristics	23/754	106/18614	3.15791e-11	1.80268e-10	6.40087e-11	A2M/BAX/BCL2/BCL2L1/CASP3/CEBPB/EREG/ESR1/HSPA5/KDR/KIT/KITLG/LEP/MMP14/MMP2/NOS3/PDGFRA/PTX3/SIRT1/SMAD4/SOD1/SRC/VEGFA	23
GO:0018107	BP	GO:0018107	peptidyl-threonine phosphorylation	23/754	109/18614	5.7744e-11	3.22721e-10	1.1459e-10	AKT1/APP/AXIN1/BCL2/BMP7/CHI3L1/EGF/GSK3A/GSK3B/MAPK1/MAPK8/MTOR/PRKCD/RIPK2/ROCK1/S1PR2/SMAD7/SPHK1/TBK1/TGFB1/TGFBR1/TGFBR2/WNT5A	23
GO:0030038	BP	GO:0030038	contractile actin filament bundle assembly	23/754	109/18614	5.7744e-11	3.22721e-10	1.1459e-10	ABL1/APOA1/CCN2/CD47/CDC42/ELN/LPAR1/MET/MIR21/MTOR/PIK3R1/PTK2B/RAC1/RHOA/ROCK1/S1PR1/SDC4/SMAD3/SRC/SRF/TGFB3/TGFBR1/TJP1	23
GO:0043149	BP	GO:0043149	stress fiber assembly	23/754	109/18614	5.7744e-11	3.22721e-10	1.1459e-10	ABL1/APOA1/CCN2/CD47/CDC42/ELN/LPAR1/MET/MIR21/MTOR/PIK3R1/PTK2B/RAC1/RHOA/ROCK1/S1PR1/SDC4/SMAD3/SRC/SRF/TGFB3/TGFBR1/TJP1	23
GO:0009408	BP	GO:0009408	response to heat	23/754	110/18614	7.02648e-11	3.89202e-10	1.38196e-10	AKT1/CALCA/CD14/CD34/CREBBP/CXCL10/CXCL12/EP300/FGF1/GSK3B/HMOX1/HSP90AA1/HSPA1A/IGF1/IL1A/MAP2K7/MAPKAPK2/MTOR/NOS3/PTGS2/SIRT1/SOD1/THBS1	23
GO:1904659	BP	GO:1904659	glucose transmembrane transport	23/754	114/18614	1.50502e-10	8.01915e-10	2.8474e-10	ACE/ADIPOQ/AKT1/AKT2/C3/EDN1/EDNRA/GSK3A/IGF1/IL1B/INS/LEP/MAPK14/NFE2L2/OCLN/PIK3R1/PLA2G1B/PPBP/PTH/PTPN11/SLC2A1/TERT/TNF	23
GO:0008645	BP	GO:0008645	hexose transmembrane transport	23/754	117/18614	2.60358e-10	1.34751e-09	4.78468e-10	ACE/ADIPOQ/AKT1/AKT2/C3/EDN1/EDNRA/GSK3A/IGF1/IL1B/INS/LEP/MAPK14/NFE2L2/OCLN/PIK3R1/PLA2G1B/PPBP/PTH/PTPN11/SLC2A1/TERT/TNF	23
GO:0018210	BP	GO:0018210	peptidyl-threonine modification	23/754	119/18614	3.71307e-10	1.88174e-09	6.68158e-10	AKT1/APP/AXIN1/BCL2/BMP7/CHI3L1/EGF/GSK3A/GSK3B/MAPK1/MAPK8/MTOR/PRKCD/RIPK2/ROCK1/S1PR2/SMAD7/SPHK1/TBK1/TGFB1/TGFBR1/TGFBR2/WNT5A	23
GO:0021782	BP	GO:0021782	glial cell development	23/754	119/18614	3.71307e-10	1.88174e-09	6.68158e-10	ADORA2A/AGER/AKT1/AKT2/APP/C1QA/C5AR1/IFNG/IL1B/IL6/KRAS/LPAR1/LRP1/PTEN/S100A8/S100A9/SHH/SOD1/TLR2/TLR4/TNF/TREM2/VIM	23
GO:0015749	BP	GO:0015749	monosaccharide transmembrane transport	23/754	120/18614	4.42086e-10	2.21439e-09	7.86273e-10	ACE/ADIPOQ/AKT1/AKT2/C3/EDN1/EDNRA/GSK3A/IGF1/IL1B/INS/LEP/MAPK14/NFE2L2/OCLN/PIK3R1/PLA2G1B/PPBP/PTH/PTPN11/SLC2A1/TERT/TNF	23
GO:0043200	BP	GO:0043200	response to amino acid	23/754	120/18614	4.42086e-10	2.21439e-09	7.86273e-10	ARG1/BCL2/BCL2L1/CASP3/CCN2/CEBPB/COL1A1/COL1A2/COL3A1/CYBB/EDN1/EGFR/IGF1R/MMP2/MTOR/MYD88/PDGFRA/PDX1/RHOA/SOCS1/TNF/XBP1/ZEB1	23
GO:0071774	BP	GO:0071774	response to fibroblast growth factor	23/754	120/18614	4.42086e-10	2.21439e-09	7.86273e-10	CCL2/CCL5/CCN2/CD44/COL1A1/CTNNB1/CXCL13/CXCL8/FGF1/FGF10/FGF2/FGF7/FGF9/FGFR1/FGFR2/GATA3/KL/MIR146A/PTH/PTPN11/SCGB1A1/THBS1/WNT5A	23
GO:0003206	BP	GO:0003206	cardiac chamber morphogenesis	23/754	126/18614	1.21016e-09	5.7334e-09	2.03579e-09	BMP2/BMP4/BMP7/BMPR2/EDNRA/ENG/FGFR2/GATA3/GATA6/GSK3A/HIF1A/MDM2/NOS3/SMAD4/SMAD7/SRF/TEK/TGFB1/TGFB2/TGFBR1/TGFBR2/TP53/WNT5A	23
GO:0071482	BP	GO:0071482	cellular response to light stimulus	23/754	127/18614	1.42227e-09	6.67061e-09	2.36857e-09	AKT2/ATF4/BAX/CASP9/CDKN1A/CREBBP/EP300/MAPK14/MMP1/MMP2/MMP3/MMP9/MYC/NLRP1/PARP1/PIK3R1/PRKCD/PTGS2/SIRT1/SMPD1/TIMP1/TP53/YY1	23
GO:0008360	BP	GO:0008360	regulation of cell shape	23/754	138/18614	7.54695e-09	3.21147e-08	1.14031e-08	ANXA1/CCL11/CCL13/CCL2/CCL24/CCL3/CCL7/CSF1R/F2/FN1/GNA13/ITGB2/KDR/KIT/LPAR1/MIR21/MYH14/PDPN/PLXNA2/PTK2/PTK2B/RAC1/VEGFA	23
GO:0034101	BP	GO:0034101	erythrocyte homeostasis	23/754	139/18614	8.70376e-09	3.66199e-08	1.30028e-08	ADAR/AXL/B2M/BMP4/CASP3/CFLAR/EPO/FOXO3/GATA3/HIF1A/HMOX1/HSPA1A/ISG15/JAK2/KIT/MAFB/MAPK14/MYB/SPI1/SRF/STAT1/STAT3/VEGFA	23
GO:0050852	BP	GO:0050852	T cell receptor signaling pathway	23/754	140/18614	1.00237e-08	4.17345e-08	1.48189e-08	ABL1/BCAR1/BTK/CCR7/CD28/CD8A/CTLA4/FOXP3/GATA3/HLA-DRB1/ITK/LCK/LGALS3/MAP3K7/MAPK1/PIK3CD/PTPRC/RELA/RIPK2/THY1/TRAF6/TXK/ZC3H12A	23
GO:0035107	BP	GO:0035107	appendage morphogenesis	23/754	146/18614	2.27296e-08	8.94488e-08	3.17611e-08	BAX/BMP4/BMP7/COL3A1/CREBBP/CTNNB1/DKK1/ECE1/FGF10/FGF9/FGFR2/GREM1/LEF1/LRP5/PLXNA2/SHH/SMAD4/SOX9/TGFB2/TP63/TWIST1/WNT5A/WNT7A	23
GO:0035108	BP	GO:0035108	limb morphogenesis	23/754	146/18614	2.27296e-08	8.94488e-08	3.17611e-08	BAX/BMP4/BMP7/COL3A1/CREBBP/CTNNB1/DKK1/ECE1/FGF10/FGF9/FGFR2/GREM1/LEF1/LRP5/PLXNA2/SHH/SMAD4/SOX9/TGFB2/TP63/TWIST1/WNT5A/WNT7A	23
GO:0098727	BP	GO:0098727	maintenance of cell number	23/754	181/18614	1.20994e-06	3.83456e-06	1.36156e-06	ACTB/BMP7/CDH2/CTNNB1/FGF10/HMGA2/IGF1/KIT/KLF4/LIF/LOXL2/LRP5/MIR145/MYC/PADI4/SOX2/SOX9/SPI1/STAT3/TP63/WNT7A/YAP1/ZHX2	23
GO:2000045	BP	GO:2000045	regulation of G1/S transition of mitotic cell cycle	23/754	186/18614	1.94919e-06	5.98763e-06	2.12606e-06	ACTB/ADAM17/AIF1/AKT1/ANXA1/APC/BCL2/BID/CCL2/CCND1/CDKN1A/CDKN2A/EGFR/FGF10/KLF4/MDM2/MIR29A/MIR29B1/MIR29C/MUC1/PTEN/TERT/TP53	23
GO:0120032	BP	GO:0120032	regulation of plasma membrane bounded cell projection assembly	23/754	195/18614	4.38879e-06	1.28475e-05	4.56182e-06	APC/ATG5/CAV1/CCL19/CCL21/CCR7/CDC42/EPHB2/F2RL1/GSK3B/HSP90AA1/KIT/MTOR/OCLN/P2RX7/PIK3R1/PRKCD/RAC1/SRF/TGFB3/TGFBR1/WNT1/YAP1	23
GO:0031396	BP	GO:0031396	regulation of protein ubiquitination	23/754	213/18614	1.89565e-05	5.08169e-05	1.80438e-05	ABL1/AKT1/ANGPT1/ATG5/AXIN1/CAV1/GSK3A/HSP90AA1/HSPA1A/HSPA5/ISG15/NOD2/PINK1/PTEN/RIPK2/SMAD7/SPHK1/SQSTM1/TGFBR1/TICAM1/TNFAIP3/TRAF6/XIAP	23
GO:0046034	BP	GO:0046034	ATP metabolic process	23/754	219/18614	2.95947e-05	7.70121e-05	2.73451e-05	APP/ENPP3/EP300/GAPDH/HIF1A/HSPA1A/IFNG/IGF1/IL4/INS/MTOR/NT5E/P2RX7/PARP1/PGM1/PINK1/PPARA/PPARGC1A/PRKAA2/STAT3/TAFAZZIN/TGFB1/TREM2	23
GO:1903050	BP	GO:1903050	regulation of proteolysis involved in protein catabolic process	23/754	230/18614	6.37799e-05	0.0001586	5.6315e-05	AKT1/APOE/AXIN1/AXIN2/CAV1/CEBPA/EGF/GSK3A/GSK3B/HSPA1A/IL33/KEAP1/LAMP3/MDM2/NFE2L2/PINK1/PTEN/PTK2/PTK2B/SHH/SMAD7/TREM2/WNT1	23
GO:0010948	BP	GO:0010948	negative regulation of cell cycle process	23/754	317/18614	0.00522366	0.00946683	0.00336144	APC/BCL2/BMP4/BMP7/CCL2/CCND1/CDKN1A/DUSP1/KLF4/LIF/MAPK14/MDM2/MIR29A/MIR29B1/MIR29C/MUC1/PARP9/PTEN/PTPN11/SOX2/TP53/TRIM37/WAPL	23
GO:0016042	BP	GO:0016042	lipid catabolic process	23/754	330/18614	0.00834512	0.014563	0.00517096	ADIPOQ/AKT1/AKT2/ALK/ANGPTL3/APOE/ENPP2/IL1B/INS/LEP/NEU1/PIK3CG/PLA2G1B/PLA2G4A/PLA2G4C/PLA2G7/PPARA/PRKCD/SMPD1/SPHK1/SPP1/TNF/TWIST1	23
GO:0072562	CC	GO:0072562	blood microparticle	23/756	144/19518	7.63631e-09	1.09533e-07	7.78703e-08	A2M/ACTA1/ACTB/AGT/ALB/ANXA5/APCS/APOA1/APOE/C3/CFHR1/ENG/F2/FGB/FN1/HSPA1A/PLG/POTEF/SLC2A1/TF/TFRC/TGFB1/VTN	23
GO:0005938	CC	GO:0005938	cell cortex	23/756	302/19518	0.00165185	0.00813169	0.00578105	ACTB/AKT2/AXIN1/CAV1/CCN2/CDH1/CDH2/CTNNB1/FGB/FGF1/FGFR2/KRT19/NOS2/PLA2G4C/POTEF/PTK2/PTK2B/RAC1/RHOA/SELE/SLC2A1/SNCA/TRAF6	23
GO:0001618	MF	GO:0001618	virus receptor activity	23/751	77/18369	2.51951e-14	7.47455e-13	5.1176e-13	ACE2/ANPEP/AXL/BSG/CCR5/CD209/CD4/CD80/CD86/CXCR4/DPP4/EFNB2/EGFR/HSPA1A/ICAM1/ITGAV/ITGB1/ITGB3/ITGB6/LAMP1/MRC1/NCAM1/TFRC	23
GO:0019199	MF	GO:0019199	transmembrane receptor protein kinase activity	23/751	77/18369	2.51951e-14	7.47455e-13	5.1176e-13	ACVRL1/ALK/AXL/BMPR2/CSF1R/EGFR/EPHB2/ERBB2/FGFR1/FGFR2/FLT1/FLT3/IGF1R/KDR/KIT/LTBP1/MERTK/MET/PDGFRA/PDGFRB/TEK/TGFBR1/TGFBR2	23
GO:0061135	MF	GO:0061135	endopeptidase regulator activity	23/751	187/18369	2.49321e-06	2.32217e-05	1.58992e-05	A2M/APP/C3/CD27/CST3/FURIN/GAPDH/LXN/NGF/NLRC4/NLRP1/RENBP/ROCK1/SERPINA1/SERPINE1/SERPINH1/SNCA/TIMP1/TIMP2/TIMP3/TIMP4/TNFSF14/XIAP	23
GO:0001217	MF	GO:0001217	DNA-binding transcription repressor activity	23/751	308/18369	0.00412126	0.0171934	0.0117718	ATF3/CEBPB/FOXO3/FOXP3/GATA3/IRF3/IRF8/JUN/LEF1/MYC/NFKB1/NR3C1/PPARA/RELA/RORC/SMAD3/SNAI1/SNAI2/SPI1/TBX21/TP53/YY1/ZEB1	23
GO:0002701	BP	GO:0002701	negative regulation of production of molecular mediator of immune response	22/754	47/18614	9.8027e-19	1.09571e-17	3.8906e-18	ANGPT1/APOA1/ARG1/AXL/FCGR2B/FOXP3/HMOX1/IFNA2/IFNB1/IL10/IL13RA2/IL33/IRAK3/JAK3/NOD2/SMAD7/TBX21/TGFB1/TGFB2/TGFB3/TNF/TWIST1	22
GO:1904894	BP	GO:1904894	positive regulation of receptor signaling pathway via STAT	22/754	50/18614	5.22731e-18	5.57579e-17	1.97983e-17	AGT/CCL5/F2/F2R/IL10/IL10RA/IL12B/IL23A/IL4/IL5/IL6/IL6R/IL7R/JAK2/KIT/LEP/PTK2B/SOCS1/TGFB1/TNF/TSLP/TYK2	22
GO:0045058	BP	GO:0045058	T cell selection	22/754	51/18614	8.8469e-18	9.24303e-17	3.28197e-17	ATG5/BCL2/CCR7/CD28/CD4/CTSL/FOXP3/GATA3/IL12B/IL15/IL23A/IL6/IL6R/IRF4/MTOR/PTPRC/RHOA/SHH/SRF/STAT3/STAT6/TBX21	22
GO:0002639	BP	GO:0002639	positive regulation of immunoglobulin production	22/754	53/18614	2.42812e-17	2.46778e-16	8.76249e-17	BTK/CD28/CD40/CD86/EPHB2/IL10/IL13/IL2/IL21/IL33/IL4/IL4R/IL5/IL6/MZB1/PTPRC/STAT6/TBX21/TFRC/TGFB1/TLR9/XBP1	22
GO:0050819	BP	GO:0050819	negative regulation of coagulation	22/754	54/18614	3.94327e-17	3.92924e-16	1.39518e-16	ANXA5/APOE/CD34/CD9/EDN1/F2/FAP/FGB/NOS3/PDGFA/PDGFB/PDGFRA/PLAT/PLAU/PLAUR/PLG/PRKCD/SERPINE1/THBD/THBS1/UBASH3B/VTN	22
GO:1904645	BP	GO:1904645	response to amyloid-beta	22/754	54/18614	3.94327e-17	3.92924e-16	1.39518e-16	AGER/APP/EPHB2/FCGR2B/GSK3B/ICAM1/IGF1/IGF1R/LGMN/LRP1/MIR146A/MIR200C/MMP12/MMP13/MMP2/MMP3/MMP9/PARP1/TLR4/TNF/TREM2/VCAM1	22
GO:0010518	BP	GO:0010518	positive regulation of phospholipase activity	22/754	55/18614	6.32483e-17	6.18133e-16	2.19484e-16	AGT/AGTR1/C5AR1/CCL5/CD86/EDNRA/EGFR/ESR1/FGF2/FGFR1/FGFR2/FLT1/GNA13/ITK/KIT/LPAR1/PDGFRA/PDGFRB/PLA2G1B/PTH/SELE/TXK	22
GO:2000107	BP	GO:2000107	negative regulation of leukocyte apoptotic process	22/754	56/18614	1.00254e-16	9.62988e-16	3.41933e-16	AXL/BCL2/BCL2L1/BMP4/CCL19/CCL21/CCL5/CCR7/CD27/CXCL12/CXCR2/HIF1A/IDO1/IL2/IL7R/IRF7/JAK3/KITLG/MERTK/MIF/NOD2/PDCD1	22
GO:0061756	BP	GO:0061756	leukocyte adhesion to vascular endothelial cell	22/754	57/18614	1.57127e-16	1.48383e-15	5.26873e-16	ALOX5/CCL21/CX3CR1/CXCL12/ELANE/FUT4/IL6/ITGB1/ITGB2/KLF4/LEP/MIR146A/MIR21/RELA/RHOA/ROCK1/SELE/SELL/SELP/TNF/TRAF6/VCAM1	22
GO:0001961	BP	GO:0001961	positive regulation of cytokine-mediated signaling pathway	22/754	59/18614	3.73867e-16	3.42661e-15	1.2167e-15	ADAM17/AXL/CASP1/CSF1/CXCR4/EDN1/HIF1A/HSPA1A/IL1R1/IL7/IRF3/IRF7/MAVS/MMP12/PARP9/RIPK2/STING1/TBK1/TREM2/TSLP/TXK/WNT5A	22
GO:0002763	BP	GO:0002763	positive regulation of myeloid leukocyte differentiation	22/754	59/18614	3.73867e-16	3.42661e-15	1.2167e-15	CASP8/CCR1/CD4/CREB1/CSF1/FOS/HLA-DRB1/IFNG/IL12B/IL17A/IL23A/IL5/KITLG/LEF1/LIF/MIR145/PF4/TGFB1/TNF/TNFSF11/TRAF6/TREM2	22
GO:0003179	BP	GO:0003179	heart valve morphogenesis	22/754	60/18614	5.68108e-16	5.09025e-15	1.80742e-15	AXIN2/BMP2/BMP4/BMPR2/CDH11/ELN/GATA3/MDM2/MTOR/NFATC1/NOS3/RHOA/ROCK1/SMAD2/SMAD4/SNAI1/SNAI2/SOX9/TGFB1/TGFB2/TGFBR2/TWIST1	22
GO:0090303	BP	GO:0090303	positive regulation of wound healing	22/754	62/18614	1.27562e-15	1.10751e-14	3.93251e-15	ANXA1/CCN4/CLDN4/CXCR4/F2/F2R/F3/HBEGF/ITGB1/MIR29A/MTOR/NFE2L2/OCLN/PLAT/PLAU/PLG/PTK2/SERPINE1/THBD/THBS1/VTN/XBP1	22
GO:0032623	BP	GO:0032623	interleukin-2 production	22/754	63/18614	1.88636e-15	1.60541e-14	5.70042e-15	ABL1/ANXA1/CCR2/CD28/CD34/CD4/CD80/CD86/FOXP3/GATA3/IL17F/IL1A/IL1B/IRF4/MAP3K7/NOD2/PTPRC/RIPK2/SFTPD/TBX21/TNFAIP3/TRAF6	22
GO:0032663	BP	GO:0032663	regulation of interleukin-2 production	22/754	63/18614	1.88636e-15	1.60541e-14	5.70042e-15	ABL1/ANXA1/CCR2/CD28/CD34/CD4/CD80/CD86/FOXP3/GATA3/IL17F/IL1A/IL1B/IRF4/MAP3K7/NOD2/PTPRC/RIPK2/SFTPD/TBX21/TNFAIP3/TRAF6	22
GO:0045453	BP	GO:0045453	bone resorption	22/754	64/18614	2.76633e-15	2.31908e-14	8.23446e-15	CALCA/CD38/CSF1R/CTNNB1/CTSK/IL6/IL7/ITGB3/NOX4/P2RX7/PTH/PTK2B/S1PR1/SPP1/SRC/TCIRG1/TF/TFRC/TNFAIP3/TNFSF11/TRAF6/UBASH3B	22
GO:0045670	BP	GO:0045670	regulation of osteoclast differentiation	22/754	68/18614	1.18427e-14	9.4877e-14	3.36885e-14	CCL3/CCR1/CEBPB/CREB1/CSF1/CTNNB1/FOS/IFNG/IL12B/IL17A/IL23A/IL4/MAFB/MTOR/PIK3R1/TLR3/TLR4/TNF/TNFSF11/TRAF6/TREM2/UBASH3B	22
GO:0060337	BP	GO:0060337	type I interferon-mediated signaling pathway	22/754	76/18614	1.5794e-13	1.16377e-12	4.13225e-13	ADAR/IFI27/IFNA1/IFNA2/IFNAR1/IFNB1/IRF3/IRF7/ISG15/JAK1/MAVS/MIR21/MMP12/MYD88/PTPN11/STAT1/STAT2/STING1/TBK1/TRAF3/TYK2/WNT5A	22
GO:0071357	BP	GO:0071357	cellular response to type I interferon	22/754	77/18614	2.12802e-13	1.54564e-12	5.48819e-13	ADAR/IFI27/IFNA1/IFNA2/IFNAR1/IFNB1/IRF3/IRF7/ISG15/JAK1/MAVS/MIR21/MMP12/MYD88/PTPN11/STAT1/STAT2/STING1/TBK1/TRAF3/TYK2/WNT5A	22
GO:0045913	BP	GO:0045913	positive regulation of carbohydrate metabolic process	22/754	79/18614	3.80494e-13	2.68697e-12	9.54075e-13	AKT1/AKT2/APP/EGF/GPT/HAS2/HIF1A/IFNG/IGF1/IGF2/INS/MTOR/NFKB1/P2RX7/PDGFB/PPARA/PPARGC1A/PRKAA2/PTH/SIRT1/SNCA/SRC	22
GO:0043299	BP	GO:0043299	leukocyte degranulation	22/754	81/18614	6.67357e-13	4.62525e-12	1.64231e-12	ADORA2B/BTK/CCL3/CCR2/F2RL1/FCGR2B/FCGR3A/GRP/HMOX1/IL13/IL13RA2/IL4/IL4R/ITGAM/ITGB2/KIT/LAMP1/LGALS9/PIK3CD/PIK3CG/PTGDS/SPI1	22
GO:0032370	BP	GO:0032370	positive regulation of lipid transport	22/754	87/18614	3.24207e-12	2.08925e-11	7.41841e-12	ABCA3/ADIPOQ/APOA1/APOE/CAV1/EDN1/FASLG/IL1A/IL1B/LRP1/MAP2K6/MIF/NFKBIA/P2RX7/PLA2G4A/PPARG/PRKCD/RXRA/SIRT1/SPP1/TNFSF11/TREM2	22
GO:0033273	BP	GO:0033273	response to vitamin	22/754	88/18614	4.16029e-12	2.64746e-11	9.40047e-12	ARG1/BECN1/BMP7/CAT/CCND1/COL1A1/CXCL10/EPO/FOLR2/IGF1R/IL15/IL1A/KL/LEP/PDX1/POSTN/PTGS2/PTH/RXRA/SNAI2/SOD2/SPP1	22
GO:0001942	BP	GO:0001942	hair follicle development	22/754	91/18614	8.59919e-12	5.30347e-11	1.88313e-11	BCL2/CTNNB1/DKK1/EGFR/FGF10/FGF7/FGFR2/FZD3/GLI2/IGFBP5/KRT17/LGR5/PDGFA/RELA/SHH/SMAD4/SNAI1/SOX9/TGFB2/TNF/TP63/WNT5A	22
GO:0034644	BP	GO:0034644	cellular response to UV	22/754	93/18614	1.37121e-11	8.27454e-11	2.93809e-11	ATF4/BAX/CASP9/CDKN1A/CREBBP/EP300/MAPK14/MMP1/MMP2/MMP3/MMP9/MYC/NLRP1/PARP1/PIK3R1/PRKCD/PTGS2/SIRT1/SMPD1/TIMP1/TP53/YY1	22
GO:0050886	BP	GO:0050886	endocrine process	22/754	93/18614	1.37121e-11	8.27454e-11	2.93809e-11	ACE/ACE2/AGT/AGTR1/AGTR2/CMA1/ECE1/EDN1/F2R/F2RL1/GATA3/IL1B/KRAS/LEP/NOS3/NOX1/PPARG/PTPN11/REN/RHOA/SMAD4/SPP1	22
GO:1900542	BP	GO:1900542	regulation of purine nucleotide metabolic process	22/754	93/18614	1.37121e-11	8.27454e-11	2.93809e-11	ADORA2B/APP/EP300/HIF1A/IFNG/IGF1/IL4/INS/MTOR/NOS2/NOS3/P2RX7/PARP1/PINK1/PPARA/PPARGC1A/PRKAA2/SNCA/STAT3/TAFAZZIN/TP53/TREM2	22
GO:0006140	BP	GO:0006140	regulation of nucleotide metabolic process	22/754	94/18614	1.72293e-11	1.02861e-10	3.65235e-11	ADORA2B/APP/EP300/HIF1A/IFNG/IGF1/IL4/INS/MTOR/NOS2/NOS3/P2RX7/PARP1/PINK1/PPARA/PPARGC1A/PRKAA2/SNCA/STAT3/TAFAZZIN/TP53/TREM2	22
GO:0022404	BP	GO:0022404	molting cycle process	22/754	94/18614	1.72293e-11	1.02861e-10	3.65235e-11	BCL2/CTNNB1/DKK1/EGFR/FGF10/FGF7/FGFR2/FZD3/GLI2/IGFBP5/KRT17/LGR5/PDGFA/RELA/SHH/SMAD4/SNAI1/SOX9/TGFB2/TNF/TP63/WNT5A	22
GO:0022405	BP	GO:0022405	hair cycle process	22/754	94/18614	1.72293e-11	1.02861e-10	3.65235e-11	BCL2/CTNNB1/DKK1/EGFR/FGF10/FGF7/FGFR2/FZD3/GLI2/IGFBP5/KRT17/LGR5/PDGFA/RELA/SHH/SMAD4/SNAI1/SOX9/TGFB2/TNF/TP63/WNT5A	22
GO:0002753	BP	GO:0002753	cytosolic pattern recognition receptor signaling pathway	22/754	95/18614	2.15792e-11	1.27204e-10	4.51668e-11	CAV1/F2RL1/HMGB1/HSPA1A/IFIH1/IRF3/IRF7/MAP2K6/MAP3K7/MYD88/NFKBIA/NOD2/RELA/RIPK2/TLR4/TLR7/TLR8/TLR9/TNF/TNFAIP3/TRAF6/XIAP	22
GO:0007044	BP	GO:0007044	cell-substrate junction assembly	22/754	96/18614	2.69428e-11	1.56352e-10	5.55167e-11	ABL1/ACVRL1/BCL2/CDH11/FN1/GREM1/ITGB3/KDR/MMP14/PTEN/PTK2/PTK2B/RAC1/RHOA/ROCK1/SDC4/SMAD3/SRC/TEK/THBS1/THY1/VEGFA	22
GO:0030101	BP	GO:0030101	natural killer cell activation	22/754	100/18614	6.35473e-11	3.53391e-10	1.2548e-10	AXL/CASP8/CD2/FCGR3A/GATA3/IFNA1/IFNA2/IFNB1/IL12B/IL15/IL18/IL2/IL23A/IL2RB/JAK2/LAMP1/LEP/MERTK/PIK3CD/PTPRC/TICAM1/TYK2	22
GO:0061326	BP	GO:0061326	renal tubule development	22/754	100/18614	6.35473e-11	3.53391e-10	1.2548e-10	AGT/AGTR2/BCL2/BMP2/BMP4/CTNNB1/FGF1/FGF2/GATA3/GREM1/LGR5/LIF/MYC/PROM1/SHH/SMAD4/SOX9/STAT1/VEGFA/WNT1/WNT7B/YAP1	22
GO:0032526	BP	GO:0032526	response to retinoic acid	22/754	107/18614	2.56802e-10	1.33033e-09	4.72368e-10	CD38/COL1A1/CREB1/DKK1/FGFR2/GATA6/GSK3B/IGFBP2/KLF4/LEP/MMP2/PDGFA/PDGFRB/PTK2B/RXRA/SOX9/TFRC/TNF/WNT3A/WNT5A/WNT7B/YAP1	22
GO:0048259	BP	GO:0048259	regulation of receptor-mediated endocytosis	22/754	115/18614	1.09815e-09	5.26962e-09	1.87111e-09	ADIPOQ/ANGPT1/B2M/C3/CCL19/CCL21/CD63/DKK1/EFNB2/EGF/GREM1/IL4/ITGAV/ITGB3/LPAR1/RAC1/SELE/SERPINE1/TF/VEGFA/VTN/WNT3A	22
GO:0015908	BP	GO:0015908	fatty acid transport	22/754	116/18614	1.3043e-09	6.12757e-09	2.17575e-09	ACE/AKT1/AKT2/ANXA1/APOE/EDN1/FABP4/IL1A/IL1B/LEP/MAP2K6/MIF/NOS2/P2RX7/PLA2G1B/PLA2G4A/PPARA/PPARG/PTGS2/SLC2A1/THBS1/TNFSF11	22
GO:0007088	BP	GO:0007088	regulation of mitotic nuclear division	22/754	117/18614	1.54605e-09	7.18497e-09	2.5512e-09	APC/BMP4/BMP7/CD28/CDC42/DUSP1/EDN1/EGF/EREG/IGF1/IGF2/IL1A/IL1B/INS/LRP5/MKI67/NUP62/PDGFB/PDGFRB/SPHK1/TGFA/TNF	22
GO:0031623	BP	GO:0031623	receptor internalization	22/754	125/18614	5.63204e-09	2.4336e-08	8.6411e-09	ADM/ANGPT1/CAV1/CD63/CD9/CXCL8/CXCR1/CXCR2/DKK1/EFNB2/EGF/GREM1/ITGB1/ITGB2/ITGB3/LPAR1/LRP1/SELE/SNCA/TFRC/VEGFA/WNT3A	22
GO:0035303	BP	GO:0035303	regulation of dephosphorylation	22/754	127/18614	7.64547e-09	3.24599e-08	1.15257e-08	AGTR2/BMP2/CDH5/GSK3B/IFNG/ITGA1/JAK2/LGALS3/MIR146A/MTOR/PDGFRB/PINK1/PRKCD/PTPRC/RIPK3/ROCK1/SMAD3/SMPD1/SRC/TGFB1/TGFB2/TNF	22
GO:0048593	BP	GO:0048593	camera-type eye morphogenesis	22/754	127/18614	7.64547e-09	3.24599e-08	1.15257e-08	AQP5/ATF4/BAX/BMP4/BMP7/CTNNB1/EPHB2/FAT1/HIF1A/KDR/LRP5/PITX2/PROM1/SOX9/STAT3/THY1/TWIST1/VEGFA/WNT5A/YY1/ZEB1/ZHX2	22
GO:0072175	BP	GO:0072175	epithelial tube formation	22/754	138/18614	3.67455e-08	1.40749e-07	4.99764e-08	ABL1/ADM/BMP4/BMP7/CASP3/CTNNB1/EGF/FGF10/FGF2/FGFR2/FZD3/GATA3/GREM1/HIF1A/PIK3CD/SDC4/SOX9/TGFB1/TGFB2/TRAF6/TWIST1/WNT5A	22
GO:1904064	BP	GO:1904064	positive regulation of cation transmembrane transport	22/754	152/18614	2.14104e-07	7.45897e-07	2.64849e-07	ABL1/BAX/CAV1/CD19/CX3CL1/CXCL10/CXCL11/CXCL9/EDN1/EDNRA/F2/F2R/IFNG/IL13/KCNMB1/MIR21/MS4A1/P2RX7/PLA2G1B/SNCA/THY1/TREM2	22
GO:0030010	BP	GO:0030010	establishment of cell polarity	22/754	155/18614	3.03204e-07	1.03913e-06	3.68971e-07	ABL1/CCL19/CCL21/CCR7/CDC42/CDH5/FAT1/FGF10/FOXJ1/GATA3/GSK3B/HSP90AA1/IGF1R/ITGB1/PTK2/PTK2B/RHOA/ROCK1/SHH/TCIRG1/WNT5A/WNT7A	22
GO:0051961	BP	GO:0051961	negative regulation of nervous system development	22/754	156/18614	3.39765e-07	1.15454e-06	4.09949e-07	B2M/BMP7/CCL11/CDH1/CTNNB1/DKK1/EPHB2/F2/IL1B/IL6/MIR146A/PTEN/SEMA7A/SPP1/THY1/TLR2/TNF/TP53/TREM2/WNT3A/WNT5A/WNT7A	22
GO:0016241	BP	GO:0016241	regulation of macroautophagy	22/754	159/18614	4.75134e-07	1.57814e-06	5.6036e-07	AKT1/ATG5/BECN1/CASP3/ERN1/GAPDH/HIF1A/HMOX1/IL4/KDR/MAP3K7/MAPK3/MAPK8/MTOR/NOD2/PINK1/PRKAA2/RIPK2/SIRT1/STING1/TBK1/TP53	22
GO:0016052	BP	GO:0016052	carbohydrate catabolic process	22/754	162/18614	6.58479e-07	2.16656e-06	7.69292e-07	APP/CHIA/CHIT1/EP300/FUT1/FUT4/GAPDH/GLB1/GSK3A/HIF1A/IFNG/IGF1/INS/LRP5/MTOR/NEU1/P2RX7/PGM1/PPARA/PRKAA2/STAT3/TP53	22
GO:0090101	BP	GO:0090101	negative regulation of transmembrane receptor protein serine/threonine kinase signaling pathway	22/754	169/18614	1.3642e-06	4.27745e-06	1.51882e-06	ABL1/ADAM17/BMP2/CAV1/DKK1/GREM1/HSPA1A/HSPA5/LRP1/LTBP1/MIR146A/MIR29B1/NKX2-1/PPARA/PPARG/SIRT1/SMAD7/TGFB3/TP53/TRIM33/WNT1/WNT5A	22
GO:0019827	BP	GO:0019827	stem cell population maintenance	22/754	177/18614	2.97591e-06	8.92614e-06	3.16945e-06	ACTB/BMP7/CDH2/CTNNB1/FGF10/HMGA2/KIT/KLF4/LIF/LOXL2/LRP5/MIR145/MYC/PADI4/SOX2/SOX9/SPI1/STAT3/TP63/WNT7A/YAP1/ZHX2	22
GO:0032271	BP	GO:0032271	regulation of protein polymerization	22/754	191/18614	1.03385e-05	2.87182e-05	1.01971e-05	ABL1/CCL11/CCL21/CCL24/CCL26/CCR7/CDH5/CSF3/ELN/HSP90AA1/HSPA1A/MECP2/MET/MTOR/OCLN/PINK1/PRKCD/PTK2B/PYCARD/RAC1/RHOA/SNCA	22
GO:0009952	BP	GO:0009952	anterior/posterior pattern specification	22/754	209/18614	4.23032e-05	0.000107583	3.82001e-05	AXIN2/BMP2/BMP4/BMPR2/CTNNB1/DDIT3/DKK1/EP300/LEF1/LRP5/PLXNA2/SHH/SMAD2/SMAD3/SMAD4/SRF/TGFBR1/TP53/WNT1/WNT3A/WNT5A/YY1	22
GO:0045930	BP	GO:0045930	negative regulation of mitotic cell cycle	22/754	243/18614	0.000378492	0.000837438	0.000297353	ABL1/APC/BCL2/BMP4/BMP7/CCL2/CCND1/CDKN1A/CTNNB1/DUSP1/FZD3/IL10/KLF4/MDM2/MIR21/MIR29A/MIR29B1/MIR29C/MUC1/PTEN/TNF/TP53	22
GO:0098858	CC	GO:0098858	actin-based cell projection	22/756	225/19518	6.68898e-05	0.000458245	0.000325779	ACTA1/ACTA2/ANGPT1/APP/AQP5/CD44/CDC42/CTNNB1/FAT1/FZD3/ITGAV/ITGB1/ITGB3/KITLG/PDGFA/PDGFRA/PDPN/PROM1/SRC/TEK/TGFB1/VCAM1	22
GO:0048020	MF	GO:0048020	CCR chemokine receptor binding	22/751	50/18369	6.33771e-18	2.67184e-16	1.82933e-16	CCL1/CCL11/CCL13/CCL17/CCL18/CCL19/CCL2/CCL20/CCL21/CCL22/CCL24/CCL26/CCL3/CCL4/CCL5/CCL7/CCL8/CCR2/CX3CL1/CXCL13/JAK1/STAT1	22
GO:0005518	MF	GO:0005518	collagen binding	22/751	66/18369	7.00313e-15	2.2438e-13	1.53627e-13	CD44/CTSB/CTSK/CTSL/FN1/ITGA1/ITGB1/LOX/MMP12/MMP13/MMP9/PDGFA/PDGFB/SERPINH1/SMAD3/SMAD4/SMAD7/SPARC/TGFBI/THBS1/VTN/VWF	22
GO:0046332	MF	GO:0046332	SMAD binding	22/751	77/18369	2.55514e-13	6.20202e-12	4.24634e-12	ACVRL1/AXIN1/AXIN2/BMP2/COL1A2/COL3A1/CTNNB1/DROSHA/FOS/HMGA2/JUN/PARP1/PPARG/SMAD1/SMAD2/SMAD3/SMAD4/SMAD7/TGFBR1/TGFBR2/TRIM33/YY1	22
GO:0030295	MF	GO:0030295	protein kinase activator activity	22/751	135/18369	2.86638e-08	3.70317e-07	2.53545e-07	ALK/ANGPT4/AREG/BMP2/BMPR2/CCL5/CD40LG/CD79A/CDKN1A/EGF/EGFR/EPO/EREG/F2/GREM1/HBEGF/IGF2/KRAS/MAP2K1/MAP2K6/PIK3R1/TGFA	22
GO:0008528	MF	GO:0008528	G protein-coupled peptide receptor activity	22/751	142/18369	7.31171e-08	8.74131e-07	5.98492e-07	AGTR1/AGTR2/CCR1/CCR2/CCR3/CCR4/CCR5/CCR6/CCR7/CCR8/CX3CR1/CXCR1/CXCR2/CXCR3/CXCR4/CXCR5/EDNRA/F2R/F2RL1/FPR1/LTB4R/S1PR2	22
GO:0001653	MF	GO:0001653	peptide receptor activity	22/751	148/18369	1.5517e-07	1.75058e-06	1.19857e-06	AGTR1/AGTR2/CCR1/CCR2/CCR3/CCR4/CCR5/CCR6/CCR7/CCR8/CX3CR1/CXCR1/CXCR2/CXCR3/CXCR4/CXCR5/EDNRA/F2R/F2RL1/FPR1/LTB4R/S1PR2	22
GO:0005201	MF	GO:0005201	extracellular matrix structural constituent	22/751	167/18369	1.29404e-06	1.26405e-05	8.6546e-06	ADIPOQ/BGN/CD4/CHI3L1/COL1A1/COL1A2/COL3A1/ELN/FGB/FN1/LTBP1/MFGE8/MMRN1/MUC5AC/POSTN/SPARC/TGFBI/THBS1/TNC/VCAN/VTN/VWF	22
GO:0001227	MF	GO:0001227	DNA-binding transcription repressor activity, RNA polymerase II-specific	22/751	303/18369	0.00683703	0.0263291	0.0180268	ATF3/CEBPB/FOXO3/FOXP3/GATA3/IRF3/IRF8/JUN/LEF1/MYC/NFKB1/NR3C1/PPARA/RELA/RORC/SNAI1/SNAI2/SPI1/TBX21/TP53/YY1/ZEB1	22
GO:2000403	BP	GO:2000403	positive regulation of lymphocyte migration	21/754	41/18614	5.46873e-19	6.19937e-18	2.20124e-18	ABL1/ADAM10/ADAM17/AIF1/APP/CCL20/CCL21/CCL3/CCL4/CCL5/CCL7/CCR2/CXCL10/CXCL12/CXCL13/ITGB3/PTK2B/PYCARD/RHOA/TNFSF14/WNT5A	21
GO:0097028	BP	GO:0097028	dendritic cell differentiation	21/754	45/18614	6.57812e-18	6.92433e-17	2.45866e-17	AGER/AXL/CCL19/CCR7/CEBPB/CSF2/F2RL1/FCGR2B/FLT3/HMGB1/IL4/IRF4/IRF8/ITGB6/LGALS9/LTBR/PRTN3/SPI1/TGFBR2/TRAF6/TREM2	21
GO:0031294	BP	GO:0031294	lymphocyte costimulation	21/754	47/18614	2.02654e-17	2.0747e-16	7.36674e-17	AKT1/CAV1/CCL19/CCL21/CCR7/CD274/CD28/CD40LG/CD5/CD80/CD86/DPP4/EFNB2/ICOS/IL4/LCK/LGALS1/PTPN11/SRC/TNFSF13B/TNFSF14	21
GO:1905314	BP	GO:1905314	semi-lunar valve development	21/754	47/18614	2.02654e-17	2.0747e-16	7.36674e-17	AXIN2/BMP2/BMP4/BMPR2/CDH11/ELN/GATA3/NFATC1/NOS3/RHOA/ROCK1/SMAD2/SNAI1/SNAI2/SOX9/TGFB1/TGFB2/TGFBR2/TNFRSF1A/TNFRSF1B/TWIST1	21
GO:0050798	BP	GO:0050798	activated T cell proliferation	21/754	48/18614	3.46727e-17	3.47347e-16	1.23334e-16	ABL1/AGER/ARG1/CASP3/CD274/EPO/FOXP3/HMGB1/IGF1/IGF2/IGFBP2/IL12B/IL18/IL2/IL23A/IL2RA/JAK3/LGALS9/MIR21/PYCARD/RIPK3	21
GO:0030195	BP	GO:0030195	negative regulation of blood coagulation	21/754	50/18614	9.68973e-17	9.3395e-16	3.31622e-16	APOE/CD34/CD9/EDN1/F2/FAP/FGB/NOS3/PDGFA/PDGFB/PDGFRA/PLAT/PLAU/PLAUR/PLG/PRKCD/SERPINE1/THBD/THBS1/UBASH3B/VTN	21
GO:1900047	BP	GO:1900047	negative regulation of hemostasis	21/754	51/18614	1.58533e-16	1.49458e-15	5.30689e-16	APOE/CD34/CD9/EDN1/F2/FAP/FGB/NOS3/PDGFA/PDGFB/PDGFRA/PLAT/PLAU/PLAUR/PLG/PRKCD/SERPINE1/THBD/THBS1/UBASH3B/VTN	21
GO:0071622	BP	GO:0071622	regulation of granulocyte chemotaxis	21/754	53/18614	4.07947e-16	3.7026e-15	1.3147e-15	C5AR1/CCL19/CCL21/CCL5/CCR7/CSF1/CSF1R/CXCL17/CXCL8/CXCR2/DPP4/EDN1/IL23A/IL4/MAPK1/MAPK3/MCU/NOD2/PTK2/RAC1/THBS1	21
GO:0070231	BP	GO:0070231	T cell apoptotic process	21/754	56/18614	1.54017e-15	1.32488e-14	4.70432e-15	AKT1/BAX/BCL2/BMP4/CCL5/CD27/CD274/FAS/FASLG/HIF1A/IDO1/IL2RA/IL7R/JAK3/LGALS3/LGALS9/P2RX7/PDCD1/RIPK3/TP53/WNT5A	21
GO:0043388	BP	GO:0043388	positive regulation of DNA binding	21/754	57/18614	2.34695e-15	1.97638e-14	7.01762e-15	CTNNB1/EGF/EP300/GATA3/HMGB1/IFNG/IGF1/IRF4/JAK2/KLF4/MMP8/MMP9/NGF/PARP1/PDX1/PLAUR/PPARG/TGFB1/TRAF6/TWIST1/TXN	21
GO:0070228	BP	GO:0070228	regulation of lymphocyte apoptotic process	21/754	59/18614	5.29083e-15	4.35076e-14	1.54485e-14	BAX/BCL2/BMP4/BTK/CCL5/CD27/CD274/HIF1A/IDO1/IL10/IL2/IL7R/JAK3/LGALS3/LGALS9/MIF/P2RX7/PDCD1/RIPK3/TP53/WNT5A	21
GO:2000351	BP	GO:2000351	regulation of endothelial cell apoptotic process	21/754	59/18614	5.29083e-15	4.35076e-14	1.54485e-14	ABL1/ANGPT1/CCL2/CD40/CD40LG/CDH5/FASLG/FGB/GATA3/ICAM1/IL13/IL4/KDR/MIR126/NFE2L2/SERPINE1/TEK/TERT/THBS1/TNF/TNFAIP3	21
GO:0002886	BP	GO:0002886	regulation of myeloid leukocyte mediated immunity	21/754	60/18614	7.83383e-15	6.33952e-14	2.25101e-14	ADORA2B/ARG1/BTK/C3/CCR2/CX3CR1/CXCL6/F2RL1/FCGR1A/FCGR2B/HMOX1/IL13/IL13RA2/IL4/IL4R/ITGAM/ITGB2/LGALS9/MAVS/SPI1/TICAM1	21
GO:0032835	BP	GO:0032835	glomerulus development	21/754	69/18614	1.87538e-13	1.36925e-12	4.86187e-13	ACTA2/ADIPOQ/AGTR2/ANGPT1/ANGPT2/BCL2/BMP4/BMP7/CD34/CFLAR/EDNRA/EGR1/FOXJ1/IL6R/ITGB3/PDGFB/PDGFRA/PDGFRB/PECAM1/PROM1/TEK	21
GO:0002224	BP	GO:0002224	toll-like receptor signaling pathway	21/754	70/18614	2.57848e-13	1.86316e-12	6.61561e-13	BTK/CD40/ESR1/IRAK3/IRF1/IRF3/IRF4/IRF7/MAP3K7/MAPKAPK2/MIR146A/MYD88/TICAM1/TLR2/TLR3/TLR4/TLR5/TLR8/TLR9/TRAF3/TRAF6	21
GO:0001707	BP	GO:0001707	mesoderm formation	21/754	75/18614	1.16205e-12	7.87828e-12	2.79738e-12	AXIN1/BMP4/BMP7/BMPR2/DKK1/FGFR2/HMGA2/ITGB1/ITGB3/KDM6B/KLF4/LEF1/MIR145/MIR200C/SMAD1/SMAD2/SMAD3/SNAI1/SRF/WNT3A/WNT5A	21
GO:0045669	BP	GO:0045669	positive regulation of osteoblast differentiation	21/754	75/18614	1.16205e-12	7.87828e-12	2.79738e-12	BMP2/BMP4/BMP7/BMPR2/CCN4/CEBPA/CEBPB/CTNNB1/FGF2/HGF/IGF1/IL6/IL6R/IL6ST/LRP5/MIR200C/MIR21/SMAD1/TP63/WNT7B/YAP1	21
GO:0006919	BP	GO:0006919	activation of cysteine-type endopeptidase activity involved in apoptotic process	21/754	76/18614	1.54543e-12	1.03398e-11	3.67141e-12	BAX/BBC3/BID/CASP8/CASP9/CYCS/EIF2AK3/F2R/F3/FASLG/JAK2/LCK/NLRC4/NLRP1/PPARG/PYCARD/S100A8/S100A9/SMAD3/SNCA/TNF	21
GO:0010827	BP	GO:0010827	regulation of glucose transmembrane transport	21/754	77/18614	2.04517e-12	1.34267e-11	4.76747e-12	ACE/ADIPOQ/AKT1/AKT2/C3/EDN1/EDNRA/GSK3A/IGF1/IL1B/INS/LEP/MAPK14/NFE2L2/OCLN/PIK3R1/PLA2G1B/PTH/PTPN11/TERT/TNF	21
GO:0048332	BP	GO:0048332	mesoderm morphogenesis	21/754	77/18614	2.04517e-12	1.34267e-11	4.76747e-12	AXIN1/BMP4/BMP7/BMPR2/DKK1/FGFR2/HMGA2/ITGB1/ITGB3/KDM6B/KLF4/LEF1/MIR145/MIR200C/SMAD1/SMAD2/SMAD3/SNAI1/SRF/WNT3A/WNT5A	21
GO:0042310	BP	GO:0042310	vasoconstriction	21/754	79/18614	3.53104e-12	2.26245e-11	8.03341e-12	ABL1/ACE/ACE2/ADM/AGT/AGTR1/BMPR2/CAV1/CD38/CRP/ECE1/EDN1/EDNRA/F2R/FGB/KCNMB2/LEP/MIR21/MMP2/PTGS2/RHOA	21
GO:0061097	BP	GO:0061097	regulation of protein tyrosine kinase activity	21/754	82/18614	7.74636e-12	4.79863e-11	1.70388e-11	ACE/ADAM17/AGT/APP/AREG/CAV1/CSF1R/EGF/EREG/FCGR1A/GREM1/HBEGF/ITGB3/NOX4/PDGFB/PTPRC/SRC/TGFA/THY1/TSG101/WNT3A	21
GO:0032092	BP	GO:0032092	positive regulation of protein binding	21/754	87/18614	2.64507e-11	1.54135e-10	5.47296e-11	ABL1/ACE/APOE/APP/B2M/BMP2/BMP4/CAV1/CSF3/EP300/GSK3B/LRP1/MMP9/RIPK2/STING1/TERT/TICAM1/TRIM21/VTN/WNT3A/WNT5A	21
GO:0048864	BP	GO:0048864	stem cell development	21/754	88/18614	3.34372e-11	1.901e-10	6.74998e-11	BCL2/BMP4/BMP7/CDC42/CDH2/EDN1/EDNRA/FGF2/FN1/HIF1A/KITLG/MAPK1/MAPK3/PITX2/PTPRC/SEMA7A/SHH/SNAI2/SOX9/TWIST1/WNT7A	21
GO:0042475	BP	GO:0042475	odontogenesis of dentin-containing tooth	21/754	91/18614	6.61622e-11	3.6684e-10	1.30256e-10	ADM/BAX/BMP2/BMP4/BMP7/BSG/CFTR/CSF1/CTNNB1/FGF10/GATA6/GLI2/ITGB6/LEF1/PDGFRA/PPARA/SERPINE1/SHH/TCIRG1/TP63/TRAF6	21
GO:0060761	BP	GO:0060761	negative regulation of response to cytokine stimulus	21/754	92/18614	8.25141e-11	4.52132e-10	1.60541e-10	ADAR/ADIPOQ/APOA1/ARG1/CAV1/CCL5/F2RL1/IL1R2/IL1RN/IL6/IRAK3/ISG15/KLF4/MIR21/MIR29B1/MMP12/PPARG/PTPRC/STAT2/TREM2/XIAP	21
GO:0043502	BP	GO:0043502	regulation of muscle adaptation	21/754	96/18614	1.93531e-10	1.01954e-09	3.62014e-10	AGT/AIF1/BECN1/EDN1/FOXO3/GSK3A/IGF1/IGFBP5/IL6ST/MIR145/MIR21/NOS3/PARP1/PPARA/PPARG/ROCK1/SMAD3/SMAD4/TNFRSF1A/TNFRSF1B/YY1	21
GO:0072080	BP	GO:0072080	nephron tubule development	21/754	96/18614	1.93531e-10	1.01954e-09	3.62014e-10	AGT/AGTR2/BCL2/BMP2/BMP4/CTNNB1/FGF1/FGF2/GATA3/GREM1/LIF/MYC/PROM1/SHH/SMAD4/SOX9/STAT1/VEGFA/WNT1/WNT7B/YAP1	21
GO:0110020	BP	GO:0110020	regulation of actomyosin structure organization	21/754	104/18614	9.30797e-10	4.48577e-09	1.59279e-09	ABL1/APOA1/CCN2/CD47/CDC42/EDN1/LPAR1/MET/MIR21/MTOR/PIK3R1/RAC1/RHOA/ROCK1/S1PR1/SDC4/SMAD3/SMAD4/TGFB3/TGFBR1/TJP1	21
GO:0046822	BP	GO:0046822	regulation of nucleocytoplasmic transport	21/754	107/18614	1.60969e-09	7.46215e-09	2.64962e-09	ANGPT1/BMP4/CDH1/GSK3B/HSP90AA1/IFI27/IFNG/IL1B/JAK2/LEP/MAPK14/MAVS/PIK3R1/PRKCD/PTGS2/PTPN11/SHH/SMAD3/TGFB1/TXN/ZC3H12A	21
GO:1901655	BP	GO:1901655	cellular response to ketone	21/754	107/18614	1.60969e-09	7.46215e-09	2.64962e-09	ACE/AHR/AKT1/AR/ARG1/AXIN2/CASP9/CFLAR/CFTR/CREB1/FOS/IGF1R/JAK2/NR3C1/PLAT/POSTN/PRKAA2/PTGER2/SIRT1/SPP1/SRC	21
GO:0045445	BP	GO:0045445	myoblast differentiation	21/754	110/18614	2.72777e-09	1.23389e-08	4.38123e-09	ACTB/BMP4/CCL17/CXCL10/CXCL9/DDIT3/GREM1/IGF1/IGFBP3/IL18/ITGB1/LGALS1/MAPK14/SDC1/SHH/SOX9/SRF/TGFB1/TNF/TNFSF14/WNT3A	21
GO:0044344	BP	GO:0044344	cellular response to fibroblast growth factor stimulus	21/754	113/18614	4.53502e-09	1.99216e-08	7.07366e-09	CCL2/CCL5/CCN2/CD44/COL1A1/CTNNB1/CXCL13/CXCL8/FGF1/FGF10/FGF2/FGF7/FGF9/FGFR1/FGFR2/GATA3/KL/MIR146A/PTPN11/THBS1/WNT5A	21
GO:0010633	BP	GO:0010633	negative regulation of epithelial cell migration	21/754	116/18614	7.40521e-09	3.16317e-08	1.12316e-08	ACVRL1/AGTR2/ANGPT2/ANGPT4/APOE/CXCL13/FGF2/HMGB1/IL4/KLF4/MECP2/MIR146A/MIR200C/MIR21/MIR29C/PPARG/PTEN/RHOA/TGFB1/THBS1/TNF	21
GO:2000278	BP	GO:2000278	regulation of DNA biosynthetic process	21/754	121/18614	1.61544e-08	6.55064e-08	2.32597e-08	ACVRL1/ADIPOQ/BMPR2/CDKN1A/CTNNB1/FGF2/GREM1/HGF/HSP90AA1/KLF4/MAP2K7/MAPK1/MAPK3/MYC/NOX4/PDGFB/PDGFRB/PTK2B/SRC/TNF/TP53	21
GO:0003014	BP	GO:0003014	renal system process	21/754	127/18614	3.89313e-08	1.48512e-07	5.27328e-08	ACE/ADIPOQ/ADM/ADORA2A/AGT/AGTR1/AGTR2/BCL2/BMP4/CD34/CLDN4/EDN1/EDNRA/F2R/F2RL1/HAS2/LGMN/NPPB/PDGFB/REN/RHOA	21
GO:0014902	BP	GO:0014902	myotube differentiation	21/754	127/18614	3.89313e-08	1.48512e-07	5.27328e-08	ACTA1/BCL2/CD9/CFLAR/CXCL10/CXCL9/DNER/GDF15/HDAC9/IGF1/IL4/IL4R/ITGB1/MAPK14/MMP14/MTOR/SHH/TNFSF14/WNT1/XBP1/XK	21
GO:0030218	BP	GO:0030218	erythrocyte differentiation	21/754	130/18614	5.91678e-08	2.21188e-07	7.85384e-08	ADAR/B2M/BMP4/CASP3/CFLAR/EPO/FOXO3/GATA3/HIF1A/HSPA1A/ISG15/JAK2/KIT/MAFB/MAPK14/MYB/SPI1/SRF/STAT1/STAT3/VEGFA	21
GO:0034763	BP	GO:0034763	negative regulation of transmembrane transport	21/754	153/18614	9.86136e-07	3.14485e-06	1.11666e-06	ACE/AKT1/AKT2/BCL2/CAV1/EPHB2/EPO/GRP/GSK3A/IL1B/LEP/MIR200C/MIR29B1/MIR326/MIR34A/MMP9/RRAD/THBS1/TLR9/TNF/TWIST1	21
GO:0050796	BP	GO:0050796	regulation of insulin secretion	21/754	163/18614	2.79296e-06	8.4089e-06	2.98579e-06	ALOX5/CCL5/CD38/CFTR/F2/F2RL1/HIF1A/HLA-DRB1/IFNG/IL1B/IL6/JAK2/LEP/LRP5/MCU/NOS2/PDX1/PTPN11/SYT7/TCIRG1/TNF	21
GO:0034250	BP	GO:0034250	positive regulation of amide metabolic process	21/754	169/18614	4.9918e-06	1.45367e-05	5.16162e-06	CASP3/CCL5/CD28/ERBB2/GSK3A/IFNG/IL6/KRT17/MTOR/NFE2L2/NOD2/PINK1/PRKCD/PTK2B/RELA/RHOA/SIRT3/SSB/THBS1/TNF/VIM	21
GO:0050806	BP	GO:0050806	positive regulation of synaptic transmission	21/754	170/18614	5.48276e-06	1.59168e-05	5.65165e-06	ABL1/ADORA2A/AGER/APOE/APP/CA2/CCL2/CCR2/CX3CR1/EPHB2/GSK3B/INS/LGMN/MAPK1/MECP2/PINK1/PTGS2/PTK2B/SNCA/SQSTM1/TNF	21
GO:0018394	BP	GO:0018394	peptidyl-lysine acetylation	21/754	172/18614	6.59808e-06	1.8775e-05	6.66655e-06	ACTB/ATG5/CREBBP/EP300/FOXP3/GATA3/IRF4/LEF1/LIF/MAP3K7/MECP2/MUC1/PPARGC1A/PRKAA2/SHH/SIRT1/SMAD4/SNAI2/SNCA/SPI1/TWIST1	21
GO:0072331	BP	GO:0072331	signal transduction by p53 class mediator	21/754	173/18614	7.22942e-06	2.05194e-05	7.28593e-06	AKT1/BAX/BCL2/CD44/CDKN1A/EP300/FOXM1/MAP2K6/MDM2/MIF/MIR21/MTOR/MUC1/MYC/PYCARD/SIRT1/SNAI1/SNAI2/TP53/TP63/TWIST1	21
[truncated: 2,807 more rows]

## Sheet: KEGG_result
	ID	Description	GeneRatio	BgRatio	pvalue	p.adjust	qvalue	geneID	Count
[truncated: 162 more rows]
