# Supplementary material for: Macrophages and pulmonary fibrosis: a bibliometric and visual analysis of publications from 1990 to 2023
Source: Front Med (Lausanne). 2024 Jun 17;11:1374177. doi: 10.3389/fmed.2024.1374177 (PMC11215139; doi:10.3389/fmed.2024.1374177)
Supplement: Supplementary file 13 [file Table_13.XLS]

## Sheet: Sheet4
Description	Fold Enrichment	PValue	Genes	Count
AGE-RAGE signaling pathway in diabetic complications	18.8304	2.07089e-40	CXCL8/SERPINE1/TNF/RELA/ICAM1/MAPK8/CASP3/CCL2/AKT1/MAPK1/RAC1/JAK2/MAPK3/SMAD2/TGFB2/JUN/EDN1/SMAD4/TGFB1/VCAM1/SMAD3/TGFB3/STAT1/MMP2/STAT3/FN1/MAPK14/TGFBR1/NFKB1/AGT/VEGFA/COL1A1/IL1A/COL3A1/IL6/COL1A2/IL1B/BCL2/BAX/NOX4	40
Cytokine-cytokine receptor interaction	9.0348	6.48899e-39	CSF3/CXCL9/IL1RN/CSF2/CXCL8/CSF1/IFNA1/FASLG/CXCL1/CXCL13/TNF/CXCL2/CXCL5/CCR7/IL13RA2/CCR5/CCR4/CCR2/IL10/IL4R/IL15/IL1R1/IL13/IL18/TGFBR1/TNFRSF1A/IL1A/IFNG/IL23A/IL1B/CX3CR1/CSF1R/CCL11/CXCR4/CXCR3/CCL5/CCL4/CCL3/CCL2/CCL18/CCL17/IL33/TGFB2/TGFB1/CCL22/IFNB1/TGFB3/IL2/IL4/CXCL10/CD4/IL6/IL5/CXCL12/IL2RA/IL9/IL17A	57
IL-17 signaling pathway	16.0259	1.81487e-29	CSF3/CCL11/CSF2/CXCL8/CXCL1/PTGS2/TNF/CXCL2/RELA/CXCL5/MAPK8/CASP3/CCL2/MAPK1/CCL17/MAPK3/JUN/MMP1/IL13/MUC5B/MAPK14/MMP9/NFKB1/IL4/CXCL10/IL6/MMP13/IL5/IFNG/IL1B/S100A9/IL17A	32
Viral protein interaction with cytokine and cytokine receptor	15.0643	1.62086e-28	CX3CR1/CSF1R/CXCL9/CCL11/CXCL8/CSF1/CXCR4/CXCL1/CXCL13/TNF/CXCL2/CXCL5/CCL5/CXCR3/CCL4/CCL3/CCL2/CCR7/CCR5/CCL18/CCR4/CCL17/CCR2/IL10/CCL22/IL18/IL2/TNFRSF1A/CXCL10/IL6/CXCL12/IL2RA	32
Lipid and atherosclerosis	9.19626	2.07756e-28	CXCL8/IFNA1/FASLG/CXCL1/TNF/CXCL2/RELA/ICAM1/MAPK8/CASP3/CCL5/CASP1/CCL3/CCL2/AKT1/MAPK1/NLRP3/CD14/RAC1/JAK2/MAPK3/JUN/VCAM1/IFNB1/MMP1/STAT3/IL18/MAPK14/MMP9/NFKB1/TNFRSF1A/IL6/IL1B/BCL2/BAX/CYCS/PPARG/TP53/TLR4/MYD88/NFE2L2/TLR2	42
Hepatitis B	10.7519	2.08834e-27	CXCL8/IFNA1/FASLG/TNF/RELA/IFIH1/MAPK8/MYC/CASP3/AKT1/MAPK1/STAT6/JAK2/JAK1/MAPK3/TGFB2/JUN/SMAD4/TGFB1/SMAD3/IFNB1/TGFB3/STAT1/STAT3/MAPK14/MMP9/TGFBR1/NFKB1/IL6/BCL2/BAX/CYCS/TP53/TLR4/MYD88/TLR3/TLR2	37
Kaposi sarcoma-associated herpesvirus infection	9.22109	1.24579e-25	CD86/CSF2/CXCL8/IFNA1/PDGFB/CXCL1/PTGS2/FGF2/HIF1A/CXCL2/RELA/ICAM1/MAPK8/MYC/CASP3/AKT1/MAPK1/RAC1/JAK2/CCR5/CCR4/JAK1/MAPK3/JUN/IFNB1/STAT1/STAT3/MAPK14/MTOR/NFKB1/TNFRSF1A/VEGFA/IL6/BAX/CTNNB1/CYCS/TP53/TLR3	38
PI3K-Akt signaling pathway	6.03203	3.22248e-23	CSF1R/CSF3/CSF1/IFNA1/PTEN/PDGFB/TNC/PDGFA/TGFA/FASLG/FGF2/THBS1/RELA/EGFR/INS/MYC/CD19/KDR/SPP1/AKT1/MAPK1/RAC1/JAK2/JAK1/MAPK3/PDGFRB/PDGFRA/IL4R/IFNB1/HGF/FN1/IGF1/IL2/MTOR/NFKB1/VEGFA/IL4/COL1A1/IL6/COL1A2/IL2RA/KIT/BCL2/TP53/TLR4/TLR2	46
TNF signaling pathway	11.9755	1.06071e-22	CSF2/CSF1/CXCL1/PTGS2/TNF/CXCL2/RELA/CXCL5/ICAM1/MAPK8/CASP3/CCL5/CCL2/AKT1/MAPK1/MAPK3/JUN/EDN1/VCAM1/IFNB1/IL15/MAPK14/MMP9/NFKB1/TNFRSF1A/CXCL10/MMP14/IL6/IL1B	29
Chemokine signaling pathway	7.84601	2.65117e-19	CX3CR1/CXCL9/CCL11/CXCL8/CXCR4/CXCL1/CXCL13/CXCL2/RELA/CXCL5/CCL5/CXCR3/CCL4/CCL3/CCL2/AKT1/MAPK1/CCR7/RAC1/JAK2/CCR5/CCL18/CCR4/CCL17/CCR2/MAPK3/CCL22/STAT1/STAT3/NFKB1/CXCL10/CXCL12	32
