# Supplementary material for: Macrophages and pulmonary fibrosis: a bibliometric and visual analysis of publications from 1990 to 2023
Source: Front Med (Lausanne). 2024 Jun 17;11:1374177. doi: 10.3389/fmed.2024.1374177 (PMC11215139; doi:10.3389/fmed.2024.1374177)
Supplement: Supplementary file 14 [file Table_14.XLS]

## Sheet: edge
automated_textmining	coexpression	combined_score	database_annotated	experimentally_determined_interaction	gene_fusion	homology	interaction	name	neighborhood_on_chromosome	node1_string_id	node2_string_id	phylogenetic_cooccurrence	selected	shared interaction	shared name
0.832	0.042	0.839	0	0.081	0	0	interacts with	AKT1 (interacts with) CD4	0	9606.ENSP00000451828	9606.ENSP00000011653	0	FALSE	interacts with	AKT1 (interacts with) CD4
0.872	0.118	0.988	0.9	0.11	0	0.593	interacts with	AKT1 (interacts with) MAPK1	0	9606.ENSP00000451828	9606.ENSP00000215832	0	FALSE	interacts with	AKT1 (interacts with) MAPK1
0.844	0.055	0.846	0	0	0	0	interacts with	AKT1 (interacts with) MMP2	0	9606.ENSP00000451828	9606.ENSP00000219070	0	FALSE	interacts with	AKT1 (interacts with) MMP2
0.845	0.104	0.868	0	0.126	0	0	interacts with	AKT1 (interacts with) TGFB1	0	9606.ENSP00000451828	9606.ENSP00000221930	0	FALSE	interacts with	AKT1 (interacts with) TGFB1
0.761	0	0.882	0.5	0.096	0	0	interacts with	AKT1 (interacts with) HGF	0	9606.ENSP00000451828	9606.ENSP00000222390	0	FALSE	interacts with	AKT1 (interacts with) HGF
0.72	0	0.72	0	0	0	0	interacts with	AKT1 (interacts with) CCL2	0	9606.ENSP00000451828	9606.ENSP00000225831	0	FALSE	interacts with	AKT1 (interacts with) CCL2
0.885	0.087	0.896	0	0.095	0	0	interacts with	AKT1 (interacts with) NFKB1	0	9606.ENSP00000451828	9606.ENSP00000226574	0	FALSE	interacts with	AKT1 (interacts with) NFKB1
0.816	0.049	0.817	0	0	0	0	interacts with	AKT1 (interacts with) IFNG	0	9606.ENSP00000451828	9606.ENSP00000229135	0	FALSE	interacts with	AKT1 (interacts with) IFNG
0.535	0.246	0.99	0.9	0.739	0	0.621	interacts with	AKT1 (interacts with) MAPK14	0	9606.ENSP00000451828	9606.ENSP00000229795	0.119	FALSE	interacts with	AKT1 (interacts with) MAPK14
0.628	0.063	0.704	0	0.217	0	0	interacts with	AKT1 (interacts with) TLR2	0	9606.ENSP00000451828	9606.ENSP00000260010	0	FALSE	interacts with	AKT1 (interacts with) TLR2
0.889	0	0.903	0	0.165	0	0	interacts with	AKT1 (interacts with) CDH1	0	9606.ENSP00000451828	9606.ENSP00000261769	0	FALSE	interacts with	AKT1 (interacts with) CDH1
0.853	0.069	0.918	0	0.45	0	0	interacts with	AKT1 (interacts with) SMAD2	0	9606.ENSP00000451828	9606.ENSP00000262160	0	FALSE	interacts with	AKT1 (interacts with) SMAD2
0.864	0	0.864	0	0	0	0	interacts with	AKT1 (interacts with) IL1B	0	9606.ENSP00000451828	9606.ENSP00000263341	0	FALSE	interacts with	AKT1 (interacts with) IL1B
0.859	0	0.926	0.5	0	0	0	interacts with	AKT1 (interacts with) FGF2	0	9606.ENSP00000451828	9606.ENSP00000264498	0	FALSE	interacts with	AKT1 (interacts with) FGF2
0.925	0.118	0.966	0.5	0.096	0	0	interacts with	AKT1 (interacts with) STAT3	0	9606.ENSP00000451828	9606.ENSP00000264657	0	FALSE	interacts with	AKT1 (interacts with) STAT3
0.693	0.074	0.704	0	0	0	0	interacts with	AKT1 (interacts with) ICAM1	0	9606.ENSP00000451828	9606.ENSP00000264832	0	FALSE	interacts with	AKT1 (interacts with) ICAM1
0.934	0.049	0.994	0.9	0.184	0	0	interacts with	AKT1 (interacts with) TP53	0	9606.ENSP00000451828	9606.ENSP00000269305	0	FALSE	interacts with	AKT1 (interacts with) TP53
0.445	0.042	0.792	0	0.64	0	0.559	interacts with	AKT1 (interacts with) EGFR	0	9606.ENSP00000451828	9606.ENSP00000275493	0	FALSE	interacts with	AKT1 (interacts with) EGFR
0.773	0.084	0.79	0	0.071	0	0	interacts with	AKT1 (interacts with) PPARG	0	9606.ENSP00000451828	9606.ENSP00000287820	0	FALSE	interacts with	AKT1 (interacts with) PPARG
0.72	0	0.72	0	0	0	0	interacts with	AKT1 (interacts with) CXCL8	0	9606.ENSP00000451828	9606.ENSP00000306512	0	FALSE	interacts with	AKT1 (interacts with) CXCL8
0.923	0.044	0.945	0	0.311	0	0	interacts with	AKT1 (interacts with) CASP3	0	9606.ENSP00000451828	9606.ENSP00000311032	0	FALSE	interacts with	AKT1 (interacts with) CASP3
0.775	0	0.976	0.9	0.045	0	0	interacts with	AKT1 (interacts with) NOS2	0	9606.ENSP00000451828	9606.ENSP00000327251	0	FALSE	interacts with	AKT1 (interacts with) NOS2
0.989	0.117	0.996	0	0.618	0	0	interacts with	AKT1 (interacts with) SMAD3	0	9606.ENSP00000451828	9606.ENSP00000332973	0	FALSE	interacts with	AKT1 (interacts with) SMAD3
0.844	0.055	0.846	0	0	0	0	interacts with	AKT1 (interacts with) FN1	0	9606.ENSP00000451828	9606.ENSP00000346839	0	FALSE	interacts with	AKT1 (interacts with) FN1
0.954	0.06	0.999	0.9	0.925	0	0	interacts with	AKT1 (interacts with) MTOR	0	9606.ENSP00000451828	9606.ENSP00000354558	0	FALSE	interacts with	AKT1 (interacts with) MTOR
0.767	0.078	0.775	0	0	0	0	interacts with	AKT1 (interacts with) PTGS2	0	9606.ENSP00000451828	9606.ENSP00000356438	0	FALSE	interacts with	AKT1 (interacts with) PTGS2
0.802	0	0.802	0	0	0	0	interacts with	AKT1 (interacts with) CCN2	0	9606.ENSP00000451828	9606.ENSP00000356954	0	FALSE	interacts with	AKT1 (interacts with) CCN2
0.819	0.086	0.827	0	0	0	0	interacts with	AKT1 (interacts with) MMP9	0	9606.ENSP00000451828	9606.ENSP00000361405	0	FALSE	interacts with	AKT1 (interacts with) MMP9
0.745	0.074	0.769	0	0.1	0	0	interacts with	AKT1 (interacts with) TLR4	0	9606.ENSP00000451828	9606.ENSP00000363089	0	FALSE	interacts with	AKT1 (interacts with) TLR4
0.934	0	0.935	0	0.063	0	0	interacts with	AKT1 (interacts with) IGF1	0	9606.ENSP00000451828	9606.ENSP00000376637	0	FALSE	interacts with	AKT1 (interacts with) IGF1
0.576	0.053	0.706	0	0.326	0	0.576	interacts with	AKT1 (interacts with) MAPK8	0	9606.ENSP00000451828	9606.ENSP00000378974	0	FALSE	interacts with	AKT1 (interacts with) MAPK8
0.722	0	0.722	0	0	0	0	interacts with	AKT1 (interacts with) CXCL12	0	9606.ENSP00000451828	9606.ENSP00000379140	0	FALSE	interacts with	AKT1 (interacts with) CXCL12
0.884	0.056	0.911	0	0.25	0	0	interacts with	AKT1 (interacts with) GAPDH	0	9606.ENSP00000451828	9606.ENSP00000380070	0	FALSE	interacts with	AKT1 (interacts with) GAPDH
0.952	0	0.953	0	0.071	0	0	interacts with	AKT1 (interacts with) INS	0	9606.ENSP00000451828	9606.ENSP00000380432	0	FALSE	interacts with	AKT1 (interacts with) INS
0.934	0	0.993	0.9	0	0	0	interacts with	AKT1 (interacts with) BCL2	0	9606.ENSP00000451828	9606.ENSP00000381185	0	FALSE	interacts with	AKT1 (interacts with) BCL2
0.872	0	0.872	0	0	0	0	interacts with	AKT1 (interacts with) IL6	0	9606.ENSP00000451828	9606.ENSP00000385675	0	FALSE	interacts with	AKT1 (interacts with) IL6
0.811	0	0.811	0	0.045	0	0	interacts with	AKT1 (interacts with) CD8A	0	9606.ENSP00000451828	9606.ENSP00000386559	0	FALSE	interacts with	AKT1 (interacts with) CD8A
0.903	0.074	0.907	0	0.057	0	0	interacts with	AKT1 (interacts with) TNF	0	9606.ENSP00000451828	9606.ENSP00000398698	0	FALSE	interacts with	AKT1 (interacts with) TNF
0.764	0	0.764	0	0	0	0	interacts with	AKT1 (interacts with) TGFA	0	9606.ENSP00000451828	9606.ENSP00000404131	0	FALSE	interacts with	AKT1 (interacts with) TGFA
0.728	0	0.731	0	0.052	0	0	interacts with	AKT1 (interacts with) IL10	0	9606.ENSP00000451828	9606.ENSP00000412237	0	FALSE	interacts with	AKT1 (interacts with) IL10
0.916	0	0.932	0	0.229	0	0	interacts with	AKT1 (interacts with) HIF1A	0	9606.ENSP00000451828	9606.ENSP00000437955	0	FALSE	interacts with	AKT1 (interacts with) HIF1A
0.477	0.042	0.779	0.4	0.351	0	0	interacts with	AKT1 (interacts with) VIM	0	9606.ENSP00000451828	9606.ENSP00000446007	0	FALSE	interacts with	AKT1 (interacts with) VIM
0.712	0.083	0.725	0	0	0	0	interacts with	AKT1 (interacts with) CCL5	0	9606.ENSP00000451828	9606.ENSP00000474412	0	FALSE	interacts with	AKT1 (interacts with) CCL5
0.93	0.074	0.979	0.4	0.539	0	0	interacts with	AKT1 (interacts with) CTNNB1	0	9606.ENSP00000451828	9606.ENSP00000495360	0	FALSE	interacts with	AKT1 (interacts with) CTNNB1
0.727	0.068	0.761	0	0.137	0	0	interacts with	ARG1 (interacts with) CD4	0	9606.ENSP00000349446	9606.ENSP00000011653	0	FALSE	interacts with	ARG1 (interacts with) CD4
0.726	0	0.726	0	0	0	0	interacts with	ARG1 (interacts with) CCL2	0	9606.ENSP00000349446	9606.ENSP00000225831	0	FALSE	interacts with	ARG1 (interacts with) CCL2
0.801	0	0.801	0	0	0	0	interacts with	ARG1 (interacts with) IFNG	0	9606.ENSP00000349446	9606.ENSP00000229135	0	FALSE	interacts with	ARG1 (interacts with) IFNG
0.88	0.042	0.88	0	0	0	0	interacts with	ARG1 (interacts with) IL4	0	9606.ENSP00000349446	9606.ENSP00000231449	0	FALSE	interacts with	ARG1 (interacts with) IL4
0.742	0	0.742	0	0	0	0	interacts with	ARG1 (interacts with) CD68	0	9606.ENSP00000349446	9606.ENSP00000250092	0	FALSE	interacts with	ARG1 (interacts with) CD68
0.79	0.084	0.8	0	0	0	0	interacts with	ARG1 (interacts with) IL1B	0	9606.ENSP00000349446	9606.ENSP00000263341	0	FALSE	interacts with	ARG1 (interacts with) IL1B
0.721	0.08	0.732	0	0	0	0	interacts with	ARG1 (interacts with) CCR2	0	9606.ENSP00000349446	9606.ENSP00000292301	0	FALSE	interacts with	ARG1 (interacts with) CCR2
0.798	0.086	0.807	0	0	0	0	interacts with	ARG1 (interacts with) IL13	0	9606.ENSP00000349446	9606.ENSP00000304915	0	FALSE	interacts with	ARG1 (interacts with) IL13
0.81	0	0.98	0.9	0.076	0	0	interacts with	ARG1 (interacts with) NOS2	0	9606.ENSP00000349446	9606.ENSP00000327251	0	FALSE	interacts with	ARG1 (interacts with) NOS2
0.72	0	0.72	0	0	0	0	interacts with	ARG1 (interacts with) CD8A	0	9606.ENSP00000349446	9606.ENSP00000386559	0	FALSE	interacts with	ARG1 (interacts with) CD8A
0.777	0	0.777	0	0	0	0	interacts with	ARG1 (interacts with) TNF	0	9606.ENSP00000349446	9606.ENSP00000398698	0	FALSE	interacts with	ARG1 (interacts with) TNF
0.745	0.077	0.78	0	0.137	0	0	interacts with	ARG1 (interacts with) CD163	0	9606.ENSP00000349446	9606.ENSP00000352071	0	FALSE	interacts with	ARG1 (interacts with) CD163
0.785	0.083	0.795	0	0	0	0	interacts with	ARG1 (interacts with) ITGAM	0	9606.ENSP00000349446	9606.ENSP00000496959	0	FALSE	interacts with	ARG1 (interacts with) ITGAM
0.792	0.097	0.804	0	0	0	0	interacts with	ARG1 (interacts with) IL6	0	9606.ENSP00000349446	9606.ENSP00000385675	0	FALSE	interacts with	ARG1 (interacts with) IL6
0.877	0.074	0.881	0	0	0	0	interacts with	ARG1 (interacts with) MRC1	0	9606.ENSP00000349446	9606.ENSP00000455897	0	FALSE	interacts with	ARG1 (interacts with) MRC1
0.887	0.087	0.893	0	0	0	0	interacts with	ARG1 (interacts with) IL10	0	9606.ENSP00000349446	9606.ENSP00000412237	0	FALSE	interacts with	ARG1 (interacts with) IL10
0.816	0.068	0.837	0	0.125	0	0	interacts with	BCL2 (interacts with) CD4	0	9606.ENSP00000381185	9606.ENSP00000011653	0	FALSE	interacts with	BCL2 (interacts with) CD4
0.586	0.086	0.969	0.9	0.292	0	0	interacts with	BCL2 (interacts with) MAPK1	0	9606.ENSP00000381185	9606.ENSP00000215832	0	FALSE	interacts with	BCL2 (interacts with) MAPK1
0.716	0	0.716	0	0	0	0	interacts with	BCL2 (interacts with) MMP2	0	9606.ENSP00000381185	9606.ENSP00000219070	0	FALSE	interacts with	BCL2 (interacts with) MMP2
0.803	0.114	0.818	0	0.045	0	0	interacts with	BCL2 (interacts with) NFKB1	0	9606.ENSP00000381185	9606.ENSP00000226574	0	FALSE	interacts with	BCL2 (interacts with) NFKB1
0.758	0.044	0.758	0	0	0	0	interacts with	BCL2 (interacts with) IL2	0	9606.ENSP00000381185	9606.ENSP00000226730	0	FALSE	interacts with	BCL2 (interacts with) IL2
0.783	0.092	0.795	0	0	0	0	interacts with	BCL2 (interacts with) IFNG	0	9606.ENSP00000381185	9606.ENSP00000229135	0	FALSE	interacts with	BCL2 (interacts with) IFNG
0.694	0.062	0.701	0	0	0	0	interacts with	BCL2 (interacts with) MAPK14	0	9606.ENSP00000381185	9606.ENSP00000229795	0	FALSE	interacts with	BCL2 (interacts with) MAPK14
0.736	0	0.736	0	0	0	0	interacts with	BCL2 (interacts with) CDH1	0	9606.ENSP00000381185	9606.ENSP00000261769	0	FALSE	interacts with	BCL2 (interacts with) CDH1
0.805	0.055	0.808	0	0	0	0	interacts with	BCL2 (interacts with) IL1B	0	9606.ENSP00000381185	9606.ENSP00000263341	0	FALSE	interacts with	BCL2 (interacts with) IL1B
0.84	0	0.959	0.75	0.056	0	0	interacts with	BCL2 (interacts with) STAT3	0	9606.ENSP00000381185	9606.ENSP00000264657	0	FALSE	interacts with	BCL2 (interacts with) STAT3
0.999	0.103	0.999	0.9	0.869	0	0	interacts with	BCL2 (interacts with) TP53	0	9606.ENSP00000381185	9606.ENSP00000269305	0	FALSE	interacts with	BCL2 (interacts with) TP53
0.838	0.048	0.839	0	0	0	0	interacts with	BCL2 (interacts with) EGFR	0	9606.ENSP00000381185	9606.ENSP00000275493	0	FALSE	interacts with	BCL2 (interacts with) EGFR
0.98	0.098	0.987	0	0.354	0	0	interacts with	BCL2 (interacts with) CASP3	0	9606.ENSP00000381185	9606.ENSP00000311032	0	FALSE	interacts with	BCL2 (interacts with) CASP3
0.785	0	0.785	0	0	0	0	interacts with	BCL2 (interacts with) FN1	0	9606.ENSP00000381185	9606.ENSP00000346839	0	FALSE	interacts with	BCL2 (interacts with) FN1
0.765	0	0.765	0	0	0	0	interacts with	BCL2 (interacts with) MTOR	0	9606.ENSP00000381185	9606.ENSP00000354558	0	FALSE	interacts with	BCL2 (interacts with) MTOR
0.745	0	0.745	0	0	0	0	interacts with	BCL2 (interacts with) PTGS2	0	9606.ENSP00000381185	9606.ENSP00000356438	0	FALSE	interacts with	BCL2 (interacts with) PTGS2
0.809	0.049	0.811	0	0	0	0	interacts with	BCL2 (interacts with) FASLG	0	9606.ENSP00000381185	9606.ENSP00000356694	0	FALSE	interacts with	BCL2 (interacts with) FASLG
0.794	0.087	0.804	0	0	0	0	interacts with	BCL2 (interacts with) MMP9	0	9606.ENSP00000381185	9606.ENSP00000361405	0	FALSE	interacts with	BCL2 (interacts with) MMP9
0.72	0.055	0.724	0	0	0	0	interacts with	BCL2 (interacts with) TLR4	0	9606.ENSP00000381185	9606.ENSP00000363089	0	FALSE	interacts with	BCL2 (interacts with) TLR4
0.721	0.049	0.729	0	0.061	0	0	interacts with	BCL2 (interacts with) FOXP3	0	9606.ENSP00000381185	9606.ENSP00000365380	0	FALSE	interacts with	BCL2 (interacts with) FOXP3
0.762	0.056	0.765	0	0	0	0	interacts with	BCL2 (interacts with) IGF1	0	9606.ENSP00000381185	9606.ENSP00000376637	0	FALSE	interacts with	BCL2 (interacts with) IGF1
0.713	0.094	0.979	0.9	0.287	0	0	interacts with	BCL2 (interacts with) MAPK8	0	9606.ENSP00000381185	9606.ENSP00000378974	0	FALSE	interacts with	BCL2 (interacts with) MAPK8
0.721	0.062	0.727	0	0	0	0	interacts with	BCL2 (interacts with) CXCL12	0	9606.ENSP00000381185	9606.ENSP00000379140	0	FALSE	interacts with	BCL2 (interacts with) CXCL12
0.876	0	0.876	0	0	0	0	interacts with	BCL2 (interacts with) GAPDH	0	9606.ENSP00000381185	9606.ENSP00000380070	0	FALSE	interacts with	BCL2 (interacts with) GAPDH
0.721	0	0.721	0	0	0	0	interacts with	BCL2 (interacts with) INS	0	9606.ENSP00000381185	9606.ENSP00000380432	0	FALSE	interacts with	BCL2 (interacts with) INS
0.718	0	0.718	0	0	0	0	interacts with	BCL2 (interacts with) IL10	0	9606.ENSP00000381185	9606.ENSP00000412237	0	FALSE	interacts with	BCL2 (interacts with) IL10
0.743	0.079	0.753	0	0	0	0	interacts with	BCL2 (interacts with) CCL3	0	9606.ENSP00000381185	9606.ENSP00000477908	0	FALSE	interacts with	BCL2 (interacts with) CCL3
0.779	0.051	0.781	0	0	0	0	interacts with	BCL2 (interacts with) CTNNB1	0	9606.ENSP00000381185	9606.ENSP00000495360	0	FALSE	interacts with	BCL2 (interacts with) CTNNB1
0.794	0.067	0.817	0	0.125	0	0	interacts with	BCL2 (interacts with) CASP1	0	9606.ENSP00000381185	9606.ENSP00000433138	0	FALSE	interacts with	BCL2 (interacts with) CASP1
0.827	0.066	0.831	0	0	0	0	interacts with	BCL2 (interacts with) CD8A	0	9606.ENSP00000381185	9606.ENSP00000386559	0	FALSE	interacts with	BCL2 (interacts with) CD8A
0.866	0.057	0.868	0	0	0	0	interacts with	BCL2 (interacts with) IL6	0	9606.ENSP00000381185	9606.ENSP00000385675	0	FALSE	interacts with	BCL2 (interacts with) IL6
0.876	0.08	0.885	0	0.076	0	0	interacts with	BCL2 (interacts with) TNF	0	9606.ENSP00000381185	9606.ENSP00000398698	0	FALSE	interacts with	BCL2 (interacts with) TNF
0.895	0	0.946	0	0.51	0	0	interacts with	BCL2 (interacts with) HIF1A	0	9606.ENSP00000381185	9606.ENSP00000437955	0	FALSE	interacts with	BCL2 (interacts with) HIF1A
0.934	0	0.993	0.9	0	0	0	interacts with	BCL2 (interacts with) AKT1	0	9606.ENSP00000381185	9606.ENSP00000451828	0	FALSE	interacts with	BCL2 (interacts with) AKT1
0.687	0.12	0.715	0	0.046	0	0	interacts with	CASP1 (interacts with) CD4	0	9606.ENSP00000433138	9606.ENSP00000011653	0	FALSE	interacts with	CASP1 (interacts with) CD4
0.677	0.13	0.707	0	0	0	0	interacts with	CASP1 (interacts with) CCL2	0	9606.ENSP00000433138	9606.ENSP00000225831	0	FALSE	interacts with	CASP1 (interacts with) CCL2
0.799	0.141	0.826	0	0.076	0	0	interacts with	CASP1 (interacts with) NFKB1	0	9606.ENSP00000433138	9606.ENSP00000226574	0	FALSE	interacts with	CASP1 (interacts with) NFKB1
0.885	0.105	0.893	0	0	0	0	interacts with	CASP1 (interacts with) IFNG	0	9606.ENSP00000433138	9606.ENSP00000229135	0	FALSE	interacts with	CASP1 (interacts with) IFNG
0.751	0.207	0.794	0	0	0	0	interacts with	CASP1 (interacts with) IL1RN	0	9606.ENSP00000433138	9606.ENSP00000259206	0	FALSE	interacts with	CASP1 (interacts with) IL1RN
0.729	0.31	0.809	0	0.062	0	0	interacts with	CASP1 (interacts with) TLR2	0	9606.ENSP00000433138	9606.ENSP00000260010	0	FALSE	interacts with	CASP1 (interacts with) TLR2
0.912	0.107	0.968	0.5	0.292	0	0	interacts with	CASP1 (interacts with) IL1A	0	9606.ENSP00000433138	9606.ENSP00000263339	0	FALSE	interacts with	CASP1 (interacts with) IL1A
0.987	0.265	0.999	0.9	0.787	0	0	interacts with	CASP1 (interacts with) IL1B	0	9606.ENSP00000433138	9606.ENSP00000263341	0	FALSE	interacts with	CASP1 (interacts with) IL1B
0.605	0.044	0.876	0.5	0.422	0	0	interacts with	CASP1 (interacts with) TP53	0	9606.ENSP00000433138	9606.ENSP00000269305	0	FALSE	interacts with	CASP1 (interacts with) TP53
0.979	0.105	0.998	0.9	0.292	0	0	interacts with	CASP1 (interacts with) IL18	0	9606.ENSP00000433138	9606.ENSP00000280357	0	FALSE	interacts with	CASP1 (interacts with) IL18
0.349	0.106	0.709	0.54	0	0	0.654	interacts with	CASP1 (interacts with) CASP3	0	9606.ENSP00000433138	9606.ENSP00000311032	0	FALSE	interacts with	CASP1 (interacts with) CASP3
0.355	0.083	0.711	0.5	0.139	0	0	interacts with	CASP1 (interacts with) SMAD3	0	9606.ENSP00000433138	9606.ENSP00000332973	0	FALSE	interacts with	CASP1 (interacts with) SMAD3
0.999	0.15	0.999	0.9	0.307	0	0	interacts with	CASP1 (interacts with) NLRP3	0	9606.ENSP00000433138	9606.ENSP00000337383	0	FALSE	interacts with	CASP1 (interacts with) NLRP3
0.888	0.263	0.916	0	0.062	0	0	interacts with	CASP1 (interacts with) TLR4	0	9606.ENSP00000433138	9606.ENSP00000363089	0	FALSE	interacts with	CASP1 (interacts with) TLR4
0.765	0.074	0.987	0.9	0.51	0	0	interacts with	CASP1 (interacts with) IL33	0	9606.ENSP00000433138	9606.ENSP00000370842	0	FALSE	interacts with	CASP1 (interacts with) IL33
0.794	0.067	0.817	0	0.125	0	0	interacts with	CASP1 (interacts with) BCL2	0	9606.ENSP00000433138	9606.ENSP00000381185	0	FALSE	interacts with	CASP1 (interacts with) BCL2
0.869	0.128	0.881	0	0	0	0	interacts with	CASP1 (interacts with) IL6	0	9606.ENSP00000433138	9606.ENSP00000385675	0	FALSE	interacts with	CASP1 (interacts with) IL6
0.883	0.171	0.904	0	0.091	0	0	interacts with	CASP1 (interacts with) TNF	0	9606.ENSP00000433138	9606.ENSP00000398698	0	FALSE	interacts with	CASP1 (interacts with) TNF
0.723	0.045	0.724	0	0	0	0	interacts with	CASP1 (interacts with) IL10	0	9606.ENSP00000433138	9606.ENSP00000412237	0	FALSE	interacts with	CASP1 (interacts with) IL10
0.771	0	0.772	0	0.046	0	0	interacts with	CASP3 (interacts with) CD4	0	9606.ENSP00000311032	9606.ENSP00000011653	0	FALSE	interacts with	CASP3 (interacts with) CD4
0.599	0.1	0.961	0.9	0.045	0	0	interacts with	CASP3 (interacts with) MAPK1	0	9606.ENSP00000311032	9606.ENSP00000215832	0	FALSE	interacts with	CASP3 (interacts with) MAPK1
0.698	0.09	0.713	0	0	0	0	interacts with	CASP3 (interacts with) MMP2	0	9606.ENSP00000311032	9606.ENSP00000219070	0	FALSE	interacts with	CASP3 (interacts with) MMP2
0.706	0.042	0.706	0	0	0	0	interacts with	CASP3 (interacts with) TGFB1	0	9606.ENSP00000311032	9606.ENSP00000221930	0	FALSE	interacts with	CASP3 (interacts with) TGFB1
0.799	0.113	0.821	0	0.076	0	0	interacts with	CASP3 (interacts with) NFKB1	0	9606.ENSP00000311032	9606.ENSP00000226574	0	FALSE	interacts with	CASP3 (interacts with) NFKB1
0.816	0.088	0.825	0	0	0	0	interacts with	CASP3 (interacts with) IFNG	0	9606.ENSP00000311032	9606.ENSP00000229135	0	FALSE	interacts with	CASP3 (interacts with) IFNG
0.733	0.105	0.817	0	0.294	0	0	interacts with	CASP3 (interacts with) MAPK14	0	9606.ENSP00000311032	9606.ENSP00000229795	0	FALSE	interacts with	CASP3 (interacts with) MAPK14
0.731	0.062	0.956	0.75	0.387	0	0	interacts with	CASP3 (interacts with) CDH1	0	9606.ENSP00000311032	9606.ENSP00000261769	0	FALSE	interacts with	CASP3 (interacts with) CDH1
0.724	0.045	0.725	0	0	0	0	interacts with	CASP3 (interacts with) IL1A	0	9606.ENSP00000311032	9606.ENSP00000263339	0	FALSE	interacts with	CASP3 (interacts with) IL1A
0.898	0.045	0.899	0	0	0	0	interacts with	CASP3 (interacts with) IL1B	0	9606.ENSP00000311032	9606.ENSP00000263341	0	FALSE	interacts with	CASP3 (interacts with) IL1B
0.801	0.055	0.804	0	0	0	0	interacts with	CASP3 (interacts with) STAT3	0	9606.ENSP00000311032	9606.ENSP00000264657	0	FALSE	interacts with	CASP3 (interacts with) STAT3
0.937	0.093	0.956	0	0.292	0	0	interacts with	CASP3 (interacts with) TP53	0	9606.ENSP00000311032	9606.ENSP00000269305	0	FALSE	interacts with	CASP3 (interacts with) TP53
0.741	0.061	0.747	0	0	0	0	interacts with	CASP3 (interacts with) EGFR	0	9606.ENSP00000311032	9606.ENSP00000275493	0	FALSE	interacts with	CASP3 (interacts with) EGFR
0.751	0.045	0.752	0	0	0	0	interacts with	CASP3 (interacts with) CXCL8	0	9606.ENSP00000311032	9606.ENSP00000306512	0	FALSE	interacts with	CASP3 (interacts with) CXCL8
0.349	0.106	0.709	0.54	0	0	0.654	interacts with	CASP3 (interacts with) CASP1	0	9606.ENSP00000311032	9606.ENSP00000433138	0	FALSE	interacts with	CASP3 (interacts with) CASP1
0.723	0.042	0.723	0	0	0	0	interacts with	CASP3 (interacts with) MTOR	0	9606.ENSP00000311032	9606.ENSP00000354558	0	FALSE	interacts with	CASP3 (interacts with) MTOR
0.719	0.092	0.74	0	0.062	0	0	interacts with	CASP3 (interacts with) TLR4	0	9606.ENSP00000311032	9606.ENSP00000363089	0	FALSE	interacts with	CASP3 (interacts with) TLR4
0.736	0.109	0.755	0	0	0	0	interacts with	CASP3 (interacts with) HMGB1	0	9606.ENSP00000311032	9606.ENSP00000345347	0	FALSE	interacts with	CASP3 (interacts with) HMGB1
0.758	0.056	0.761	0	0	0	0	interacts with	CASP3 (interacts with) INS	0	9606.ENSP00000311032	9606.ENSP00000380432	0	FALSE	interacts with	CASP3 (interacts with) INS
0.752	0.094	0.766	0	0	0	0	interacts with	CASP3 (interacts with) HIF1A	0	9606.ENSP00000311032	9606.ENSP00000437955	0	FALSE	interacts with	CASP3 (interacts with) HIF1A
0.786	0	0.786	0	0	0	0	interacts with	CASP3 (interacts with) IL10	0	9606.ENSP00000311032	9606.ENSP00000412237	0	FALSE	interacts with	CASP3 (interacts with) IL10
0.793	0.101	0.806	0	0	0	0	interacts with	CASP3 (interacts with) MMP9	0	9606.ENSP00000311032	9606.ENSP00000361405	0	FALSE	interacts with	CASP3 (interacts with) MMP9
0.863	0.055	0.865	0	0	0	0	interacts with	CASP3 (interacts with) PTGS2	0	9606.ENSP00000311032	9606.ENSP00000356438	0	FALSE	interacts with	CASP3 (interacts with) PTGS2
0.873	0.103	0.881	0	0	0	0	interacts with	CASP3 (interacts with) IL6	0	9606.ENSP00000311032	9606.ENSP00000385675	0	FALSE	interacts with	CASP3 (interacts with) IL6
0.89	0.047	0.89	0	0	0	0	interacts with	CASP3 (interacts with) GAPDH	0	9606.ENSP00000311032	9606.ENSP00000380070	0	FALSE	interacts with	CASP3 (interacts with) GAPDH
0.888	0.074	0.892	0	0	0	0	interacts with	CASP3 (interacts with) FASLG	0	9606.ENSP00000311032	9606.ENSP00000356694	0	FALSE	interacts with	CASP3 (interacts with) FASLG
0.38	0.055	0.908	0.75	0.451	0	0	interacts with	CASP3 (interacts with) VIM	0	9606.ENSP00000311032	9606.ENSP00000446007	0	FALSE	interacts with	CASP3 (interacts with) VIM
0.932	0.098	0.939	0	0.096	0	0	interacts with	CASP3 (interacts with) TNF	0	9606.ENSP00000311032	9606.ENSP00000398698	0	FALSE	interacts with	CASP3 (interacts with) TNF
0.922	0.049	0.943	0	0.292	0	0	interacts with	CASP3 (interacts with) MAPK8	0	9606.ENSP00000311032	9606.ENSP00000378974	0	FALSE	interacts with	CASP3 (interacts with) MAPK8
0.923	0.044	0.945	0	0.311	0	0	interacts with	CASP3 (interacts with) AKT1	0	9606.ENSP00000311032	9606.ENSP00000451828	0	FALSE	interacts with	CASP3 (interacts with) AKT1
0.782	0.088	0.965	0.75	0.395	0	0	interacts with	CASP3 (interacts with) CTNNB1	0	9606.ENSP00000311032	9606.ENSP00000495360	0	FALSE	interacts with	CASP3 (interacts with) CTNNB1
0.98	0.098	0.987	0	0.354	0	0	interacts with	CASP3 (interacts with) BCL2	0	9606.ENSP00000311032	9606.ENSP00000381185	0	FALSE	interacts with	CASP3 (interacts with) BCL2
0.692	0.067	0.718	0	0.099	0	0	interacts with	CCL17 (interacts with) CD4	0	9606.ENSP00000219244	9606.ENSP00000011653	0	FALSE	interacts with	CCL17 (interacts with) CD4
0.696	0.084	0.709	0	0	0	0	interacts with	CCL17 (interacts with) TNF	0	9606.ENSP00000219244	9606.ENSP00000398698	0	FALSE	interacts with	CCL17 (interacts with) TNF
0.715	0.128	0.741	0	0	0	0	interacts with	CCL17 (interacts with) IL2	0	9606.ENSP00000219244	9606.ENSP00000226730	0	FALSE	interacts with	CCL17 (interacts with) IL2
0.724	0.106	0.742	0	0	0	0	interacts with	CCL17 (interacts with) CD8A	0	9606.ENSP00000219244	9606.ENSP00000386559	0	FALSE	interacts with	CCL17 (interacts with) CD8A
0.748	0.048	0.75	0	0	0	0	interacts with	CCL17 (interacts with) CCL2	0	9606.ENSP00000219244	9606.ENSP00000225831	0	FALSE	interacts with	CCL17 (interacts with) CCL2
0.749	0.06	0.753	0	0	0	0	interacts with	CCL17 (interacts with) FOXP3	0	9606.ENSP00000219244	9606.ENSP00000365380	0	FALSE	interacts with	CCL17 (interacts with) FOXP3
0.72	0.192	0.764	0	0	0	0	interacts with	CCL17 (interacts with) IFNG	0	9606.ENSP00000219244	9606.ENSP00000229135	0	FALSE	interacts with	CCL17 (interacts with) IFNG
0.724	0.197	0.768	0	0	0	0	interacts with	CCL17 (interacts with) IL10	0	9606.ENSP00000219244	9606.ENSP00000412237	0	FALSE	interacts with	CCL17 (interacts with) IL10
0.734	0.192	0.776	0	0	0	0	interacts with	CCL17 (interacts with) IL5	0	9606.ENSP00000219244	9606.ENSP00000231454	0	FALSE	interacts with	CCL17 (interacts with) IL5
0.766	0.094	0.779	0	0	0	0	interacts with	CCL17 (interacts with) IL33	0	9606.ENSP00000219244	9606.ENSP00000370842	0	FALSE	interacts with	CCL17 (interacts with) IL33
0.735	0.241	0.791	0	0	0	0	interacts with	CCL17 (interacts with) CXCL9	0	9606.ENSP00000219244	9606.ENSP00000354901	0	FALSE	interacts with	CCL17 (interacts with) CXCL9
0.77	0.143	0.794	0	0	0	0	interacts with	CCL17 (interacts with) IL4	0	9606.ENSP00000219244	9606.ENSP00000231449	0	FALSE	interacts with	CCL17 (interacts with) IL4
0.449	0	0.799	0.65	0.045	0	0	interacts with	CCL17 (interacts with) CX3CR1	0	9606.ENSP00000219244	9606.ENSP00000351059	0	FALSE	interacts with	CCL17 (interacts with) CX3CR1
0.802	0.062	0.806	0	0	0	0	interacts with	CCL17 (interacts with) IL6	0	9606.ENSP00000219244	9606.ENSP00000385675	0	FALSE	interacts with	CCL17 (interacts with) IL6
0.832	0.184	0.857	0	0	0	0	interacts with	CCL17 (interacts with) CXCL8	0	9606.ENSP00000219244	9606.ENSP00000306512	0	FALSE	interacts with	CCL17 (interacts with) CXCL8
0.857	0.21	0.883	0	0	0	0	interacts with	CCL17 (interacts with) CXCL10	0	9606.ENSP00000219244	9606.ENSP00000305651	0	FALSE	interacts with	CCL17 (interacts with) CXCL10
0.902	0.145	0.913	0	0	0	0	interacts with	CCL17 (interacts with) IL13	0	9606.ENSP00000219244	9606.ENSP00000304915	0	FALSE	interacts with	CCL17 (interacts with) IL13
0.942	0.073	0.943	0	0	0	0	interacts with	CCL17 (interacts with) CCL4	0	9606.ENSP00000219244	9606.ENSP00000482259	0	FALSE	interacts with	CCL17 (interacts with) CCL4
0.852	0	0.946	0.65	0.045	0	0	interacts with	CCL17 (interacts with) CCR2	0	9606.ENSP00000219244	9606.ENSP00000292301	0	FALSE	interacts with	CCL17 (interacts with) CCR2
0.606	0.06	0.999	0.9	0.994	0	0.805	interacts with	CCL17 (interacts with) CCL5	0	9606.ENSP00000219244	9606.ENSP00000474412	0	FALSE	interacts with	CCL17 (interacts with) CCL5
0.721	0.126	0.745	0	0	0	0	interacts with	CCL18 (interacts with) IL1B	0	9606.ENSP00000479955	9606.ENSP00000263341	0	FALSE	interacts with	CCL18 (interacts with) IL1B
0.514	0.131	0.839	0.65	0	0	0	interacts with	CCL18 (interacts with) CCR2	0	9606.ENSP00000479955	9606.ENSP00000292301	0	FALSE	interacts with	CCL18 (interacts with) CCR2
0.729	0.103	0.747	0	0	0	0	interacts with	CCL18 (interacts with) IL13	0	9606.ENSP00000479955	9606.ENSP00000304915	0	FALSE	interacts with	CCL18 (interacts with) IL13
0.624	0.279	0.717	0	0	0	0	interacts with	CCL18 (interacts with) CXCL10	0	9606.ENSP00000479955	9606.ENSP00000305651	0	FALSE	interacts with	CCL18 (interacts with) CXCL10
0.824	0.208	0.855	0	0	0	0	interacts with	CCL18 (interacts with) CXCL8	0	9606.ENSP00000479955	9606.ENSP00000306512	0	FALSE	interacts with	CCL18 (interacts with) CXCL8
0.377	0.102	0.787	0.65	0	0	0	interacts with	CCL18 (interacts with) CX3CR1	0	9606.ENSP00000479955	9606.ENSP00000351059	0	FALSE	interacts with	CCL18 (interacts with) CX3CR1
0.661	0.34	0.78	0	0.099	0	0	interacts with	CCL18 (interacts with) CD163	0	9606.ENSP00000479955	9606.ENSP00000352071	0	FALSE	interacts with	CCL18 (interacts with) CD163
0.622	0.433	0.776	0	0	0	0	interacts with	CCL18 (interacts with) CXCL9	0	9606.ENSP00000479955	9606.ENSP00000354901	0	FALSE	interacts with	CCL18 (interacts with) CXCL9
0.655	0.362	0.771	0	0	0	0	interacts with	CCL18 (interacts with) MRC1	0	9606.ENSP00000479955	9606.ENSP00000455897	0	FALSE	interacts with	CCL18 (interacts with) MRC1
0.825	0.058	0.839	0	0.099	0	0	interacts with	CCL2 (interacts with) CD4	0	9606.ENSP00000225831	9606.ENSP00000011653	0	FALSE	interacts with	CCL2 (interacts with) CD4
0.802	0.357	0.867	0	0	0	0	interacts with	CCL2 (interacts with) TIMP1	0	9606.ENSP00000225831	9606.ENSP00000218388	0	FALSE	interacts with	CCL2 (interacts with) TIMP1
0.667	0.15	0.704	0	0	0	0	interacts with	CCL2 (interacts with) MMP2	0	9606.ENSP00000225831	9606.ENSP00000219070	0	FALSE	interacts with	CCL2 (interacts with) MMP2
0.748	0.048	0.75	0	0	0	0	interacts with	CCL2 (interacts with) CCL17	0	9606.ENSP00000225831	9606.ENSP00000219244	0	FALSE	interacts with	CCL2 (interacts with) CCL17
0.843	0.086	0.851	0	0	0	0	interacts with	CCL2 (interacts with) TGFB1	0	9606.ENSP00000225831	9606.ENSP00000221930	0	FALSE	interacts with	CCL2 (interacts with) TGFB1
0.895	0.259	0.918	0	0	0	0	interacts with	CCL2 (interacts with) SERPINE1	0	9606.ENSP00000225831	9606.ENSP00000223095	0	FALSE	interacts with	CCL2 (interacts with) SERPINE1
0.875	0.146	0.93	0.4	0	0	0	interacts with	CCL2 (interacts with) CSF3	0	9606.ENSP00000225831	9606.ENSP00000225474	0	FALSE	interacts with	CCL2 (interacts with) CSF3
0.697	0.072	0.706	0	0	0	0	interacts with	CCL2 (interacts with) IL33	0	9606.ENSP00000225831	9606.ENSP00000370842	0	FALSE	interacts with	CCL2 (interacts with) IL33
0.677	0.13	0.707	0	0	0	0	interacts with	CCL2 (interacts with) CASP1	0	9606.ENSP00000225831	9606.ENSP00000433138	0	FALSE	interacts with	CCL2 (interacts with) CASP1
0.702	0.075	0.712	0	0	0	0	interacts with	CCL2 (interacts with) TGFB2	0	9606.ENSP00000225831	9606.ENSP00000355896	0	FALSE	interacts with	CCL2 (interacts with) TGFB2
0.72	0	0.72	0	0	0	0	interacts with	CCL2 (interacts with) AKT1	0	9606.ENSP00000225831	9606.ENSP00000451828	0	FALSE	interacts with	CCL2 (interacts with) AKT1
0.709	0.087	0.723	0	0	0	0	interacts with	CCL2 (interacts with) FN1	0	9606.ENSP00000225831	9606.ENSP00000346839	0	FALSE	interacts with	CCL2 (interacts with) FN1
0.712	0.08	0.724	0	0	0	0	interacts with	CCL2 (interacts with) ITGAX	0	9606.ENSP00000225831	9606.ENSP00000454623	0	FALSE	interacts with	CCL2 (interacts with) ITGAX
0.72	0.06	0.725	0	0	0	0	interacts with	CCL2 (interacts with) EGFR	0	9606.ENSP00000225831	9606.ENSP00000275493	0	FALSE	interacts with	CCL2 (interacts with) EGFR
0.726	0	0.726	0	0	0	0	interacts with	CCL2 (interacts with) ARG1	0	9606.ENSP00000225831	9606.ENSP00000349446	0	FALSE	interacts with	CCL2 (interacts with) ARG1
0.689	0.155	0.726	0	0	0	0	interacts with	CCL2 (interacts with) SPP1	0	9606.ENSP00000225831	9606.ENSP00000378517	0	FALSE	interacts with	CCL2 (interacts with) SPP1
0.729	0	0.729	0	0	0	0	interacts with	CCL2 (interacts with) GAPDH	0	9606.ENSP00000225831	9606.ENSP00000380070	0	FALSE	interacts with	CCL2 (interacts with) GAPDH
0.717	0.088	0.731	0	0	0	0	interacts with	CCL2 (interacts with) PPARG	0	9606.ENSP00000225831	9606.ENSP00000287820	0	FALSE	interacts with	CCL2 (interacts with) PPARG
0.715	0.101	0.732	0	0	0	0	interacts with	CCL2 (interacts with) FGF2	0	9606.ENSP00000225831	9606.ENSP00000264498	0	FALSE	interacts with	CCL2 (interacts with) FGF2
0.721	0.088	0.735	0	0	0	0	interacts with	CCL2 (interacts with) PTPRC	0	9606.ENSP00000225831	9606.ENSP00000411355	0	FALSE	interacts with	CCL2 (interacts with) PTPRC
0.734	0.054	0.737	0	0	0	0	interacts with	CCL2 (interacts with) FASLG	0	9606.ENSP00000225831	9606.ENSP00000356694	0	FALSE	interacts with	CCL2 (interacts with) FASLG
0.73	0.115	0.75	0	0	0	0	interacts with	CCL2 (interacts with) MMP12	0	9606.ENSP00000225831	9606.ENSP00000458585	0	FALSE	interacts with	CCL2 (interacts with) MMP12
0.755	0.06	0.76	0	0	0	0	interacts with	CCL2 (interacts with) IGF1	0	9606.ENSP00000225831	9606.ENSP00000376637	0	FALSE	interacts with	CCL2 (interacts with) IGF1
0.676	0.292	0.761	0	0	0	0	interacts with	CCL2 (interacts with) IL1RN	0	9606.ENSP00000225831	9606.ENSP00000259206	0	FALSE	interacts with	CCL2 (interacts with) IL1RN
0.766	0.044	0.766	0	0	0	0	interacts with	CCL2 (interacts with) IFNA1	0	9606.ENSP00000225831	9606.ENSP00000276927	0	FALSE	interacts with	CCL2 (interacts with) IFNA1
0.754	0.122	0.774	0	0	0	0	interacts with	CCL2 (interacts with) MMP1	0	9606.ENSP00000225831	9606.ENSP00000322788	0	FALSE	interacts with	CCL2 (interacts with) MMP1
0.771	0.076	0.78	0	0	0	0	interacts with	CCL2 (interacts with) INS	0	9606.ENSP00000225831	9606.ENSP00000380432	0	FALSE	interacts with	CCL2 (interacts with) INS
0.745	0.136	0.784	0	0.099	0	0	interacts with	CCL2 (interacts with) CD163	0	9606.ENSP00000225831	9606.ENSP00000352071	0	FALSE	interacts with	CCL2 (interacts with) CD163
0.478	0.154	0.787	0.4	0.292	0	0.867	interacts with	CCL2 (interacts with) CCL4	0	9606.ENSP00000225831	9606.ENSP00000482259	0	FALSE	interacts with	CCL2 (interacts with) CCL4
0.771	0.119	0.79	0	0	0	0	interacts with	CCL2 (interacts with) TLR2	0	9606.ENSP00000225831	9606.ENSP00000260010	0	FALSE	interacts with	CCL2 (interacts with) TLR2
0.773	0.118	0.791	0	0	0	0	interacts with	CCL2 (interacts with) EDN1	0	9606.ENSP00000225831	9606.ENSP00000368683	0	FALSE	interacts with	CCL2 (interacts with) EDN1
0.782	0.099	0.796	0	0	0	0	interacts with	CCL2 (interacts with) ITGAM	0	9606.ENSP00000225831	9606.ENSP00000496959	0	FALSE	interacts with	CCL2 (interacts with) ITGAM
0.791	0.086	0.8	0	0	0	0	interacts with	CCL2 (interacts with) CD8A	0	9606.ENSP00000225831	9606.ENSP00000386559	0	FALSE	interacts with	CCL2 (interacts with) CD8A
0.802	0.073	0.809	0	0	0	0	interacts with	CCL2 (interacts with) MMP9	0	9606.ENSP00000225831	9606.ENSP00000361405	0	FALSE	interacts with	CCL2 (interacts with) MMP9
0.798	0.122	0.815	0	0	0	0	interacts with	CCL2 (interacts with) CD68	0	9606.ENSP00000225831	9606.ENSP00000250092	0	FALSE	interacts with	CCL2 (interacts with) CD68
0.816	0.044	0.816	0	0	0	0	interacts with	CCL2 (interacts with) CRP	0	9606.ENSP00000225831	9606.ENSP00000255030	0	FALSE	interacts with	CCL2 (interacts with) CRP
0.819	0.081	0.827	0	0	0	0	interacts with	CCL2 (interacts with) MRC1	0	9606.ENSP00000225831	9606.ENSP00000455897	0	FALSE	interacts with	CCL2 (interacts with) MRC1
0.792	0.229	0.833	0	0	0	0	interacts with	CCL2 (interacts with) CSF1	0	9606.ENSP00000225831	9606.ENSP00000327513	0	FALSE	interacts with	CCL2 (interacts with) CSF1
0.818	0.162	0.841	0	0	0	0	interacts with	CCL2 (interacts with) CXCL12	0	9606.ENSP00000225831	9606.ENSP00000379140	0	FALSE	interacts with	CCL2 (interacts with) CXCL12
0.832	0.13	0.847	0	0	0	0	interacts with	CCL2 (interacts with) TLR4	0	9606.ENSP00000225831	9606.ENSP00000363089	0	FALSE	interacts with	CCL2 (interacts with) TLR4
0.852	0.049	0.853	0	0	0	0	interacts with	CCL2 (interacts with) IL2	0	9606.ENSP00000225831	9606.ENSP00000226730	0	FALSE	interacts with	CCL2 (interacts with) IL2
0.862	0.042	0.862	0	0	0	0	interacts with	CCL2 (interacts with) IL5	0	9606.ENSP00000225831	9606.ENSP00000231454	0	FALSE	interacts with	CCL2 (interacts with) IL5
0.848	0.166	0.867	0	0	0	0	interacts with	CCL2 (interacts with) PTGS2	0	9606.ENSP00000225831	9606.ENSP00000356438	0	FALSE	interacts with	CCL2 (interacts with) PTGS2
0.728	0.104	0.867	0.5	0	0	0	interacts with	CCL2 (interacts with) STAT3	0	9606.ENSP00000225831	9606.ENSP00000264657	0	FALSE	interacts with	CCL2 (interacts with) STAT3
0.873	0.042	0.874	0	0	0	0	interacts with	CCL2 (interacts with) IL17A	0	9606.ENSP00000225831	9606.ENSP00000497968	0	FALSE	interacts with	CCL2 (interacts with) IL17A
0.808	0.047	0.881	0.4	0	0	0	interacts with	CCL2 (interacts with) IL18	0	9606.ENSP00000225831	9606.ENSP00000280357	0	FALSE	interacts with	CCL2 (interacts with) IL18
0.873	0.045	0.921	0.4	0	0	0	interacts with	CCL2 (interacts with) IL4	0	9606.ENSP00000225831	9606.ENSP00000231449	0	FALSE	interacts with	CCL2 (interacts with) IL4
0.892	0.36	0.928	0	0	0	0	interacts with	CCL2 (interacts with) ICAM1	0	9606.ENSP00000225831	9606.ENSP00000264832	0	FALSE	interacts with	CCL2 (interacts with) ICAM1
0.879	0.13	0.931	0.4	0	0	0	interacts with	CCL2 (interacts with) CSF2	0	9606.ENSP00000225831	9606.ENSP00000296871	0	FALSE	interacts with	CCL2 (interacts with) CSF2
0.891	0.049	0.932	0.4	0	0	0	interacts with	CCL2 (interacts with) IL13	0	9606.ENSP00000225831	9606.ENSP00000304915	0	FALSE	interacts with	CCL2 (interacts with) IL13
0.882	0.144	0.934	0.4	0	0	0	interacts with	CCL2 (interacts with) IL1A	0	9606.ENSP00000225831	9606.ENSP00000263339	0	FALSE	interacts with	CCL2 (interacts with) IL1A
0.926	0.195	0.938	0	0	0	0	interacts with	CCL2 (interacts with) IFNG	0	9606.ENSP00000225831	9606.ENSP00000229135	0	FALSE	interacts with	CCL2 (interacts with) IFNG
0.929	0.214	0.963	0.4	0	0	0	interacts with	CCL2 (interacts with) IL10	0	9606.ENSP00000225831	9606.ENSP00000412237	0	FALSE	interacts with	CCL2 (interacts with) IL10
0.915	0.373	0.965	0.4	0	0	0	interacts with	CCL2 (interacts with) CXCL10	0	9606.ENSP00000225831	9606.ENSP00000305651	0	FALSE	interacts with	CCL2 (interacts with) CXCL10
0.94	0.239	0.97	0.4	0	0	0	interacts with	CCL2 (interacts with) IL1B	0	9606.ENSP00000225831	9606.ENSP00000263341	0	FALSE	interacts with	CCL2 (interacts with) IL1B
0.952	0.311	0.978	0.4	0	0	0	interacts with	CCL2 (interacts with) TNF	0	9606.ENSP00000225831	9606.ENSP00000398698	0	FALSE	interacts with	CCL2 (interacts with) TNF
0.811	0.139	0.982	0.9	0	0	0	interacts with	CCL2 (interacts with) NFKB1	0	9606.ENSP00000225831	9606.ENSP00000226574	0	FALSE	interacts with	CCL2 (interacts with) NFKB1
0.953	0.517	0.985	0.4	0	0	0	interacts with	CCL2 (interacts with) IL6	0	9606.ENSP00000225831	9606.ENSP00000385675	0	FALSE	interacts with	CCL2 (interacts with) IL6
0.996	0.056	0.998	0.65	0.071	0	0	interacts with	CCL2 (interacts with) CX3CR1	0	9606.ENSP00000225831	9606.ENSP00000351059	0	FALSE	interacts with	CCL2 (interacts with) CX3CR1
0.882	0.156	0.999	0.4	0.994	0	0.825	interacts with	CCL2 (interacts with) CCL5	0	9606.ENSP00000225831	9606.ENSP00000474412	0	FALSE	interacts with	CCL2 (interacts with) CCL5
0.948	0.487	0.999	0.4	0.994	0	0	interacts with	CCL2 (interacts with) CXCL8	0	9606.ENSP00000225831	9606.ENSP00000306512	0	FALSE	interacts with	CCL2 (interacts with) CXCL8
0.901	0.237	0.999	0	0.994	0	0	interacts with	CCL2 (interacts with) CXCL9	0	9606.ENSP00000225831	9606.ENSP00000354901	0	FALSE	interacts with	CCL2 (interacts with) CXCL9
0.999	0.084	0.999	0.9	0.949	0	0	interacts with	CCL2 (interacts with) CCR2	0	9606.ENSP00000225831	9606.ENSP00000292301	0	FALSE	interacts with	CCL2 (interacts with) CCR2
0.855	0.156	0.88	0	0.099	0	0	interacts with	CCL3 (interacts with) CD4	0	9606.ENSP00000477908	9606.ENSP00000011653	0	FALSE	interacts with	CCL3 (interacts with) CD4
0.879	0.104	0.929	0.4	0	0	0	interacts with	CCL3 (interacts with) CSF3	0	9606.ENSP00000477908	9606.ENSP00000225474	0	FALSE	interacts with	CCL3 (interacts with) CSF3
0.73	0.11	0.749	0	0	0	0	interacts with	CCL3 (interacts with) NFKB1	0	9606.ENSP00000477908	9606.ENSP00000226574	0	FALSE	interacts with	CCL3 (interacts with) NFKB1
0.87	0.089	0.876	0	0	0	0	interacts with	CCL3 (interacts with) IL2	0	9606.ENSP00000477908	9606.ENSP00000226730	0	FALSE	interacts with	CCL3 (interacts with) IL2
0.924	0.332	0.947	0	0	0	0	interacts with	CCL3 (interacts with) IFNG	0	9606.ENSP00000477908	9606.ENSP00000229135	0	FALSE	interacts with	CCL3 (interacts with) IFNG
0.821	0.074	0.827	0	0	0	0	interacts with	CCL3 (interacts with) IL4	0	9606.ENSP00000477908	9606.ENSP00000231449	0	FALSE	interacts with	CCL3 (interacts with) IL4
0.828	0.067	0.833	0	0	0	0	interacts with	CCL3 (interacts with) IL5	0	9606.ENSP00000477908	9606.ENSP00000231454	0	FALSE	interacts with	CCL3 (interacts with) IL5
0.759	0	0.759	0	0	0	0	interacts with	CCL3 (interacts with) CRP	0	9606.ENSP00000477908	9606.ENSP00000255030	0	FALSE	interacts with	CCL3 (interacts with) CRP
0.738	0.204	0.782	0	0	0	0	interacts with	CCL3 (interacts with) IL1RN	0	9606.ENSP00000477908	9606.ENSP00000259206	0	FALSE	interacts with	CCL3 (interacts with) IL1RN
0.76	0.15	0.787	0	0	0	0	interacts with	CCL3 (interacts with) TLR2	0	9606.ENSP00000477908	9606.ENSP00000260010	0	FALSE	interacts with	CCL3 (interacts with) TLR2
0.841	0.259	0.923	0.4	0	0	0	interacts with	CCL3 (interacts with) IL1A	0	9606.ENSP00000477908	9606.ENSP00000263339	0	FALSE	interacts with	CCL3 (interacts with) IL1A
0.883	0.64	0.972	0.4	0	0	0	interacts with	CCL3 (interacts with) IL1B	0	9606.ENSP00000477908	9606.ENSP00000263341	0	FALSE	interacts with	CCL3 (interacts with) IL1B
0.721	0.065	0.858	0.5	0	0	0	interacts with	CCL3 (interacts with) STAT3	0	9606.ENSP00000477908	9606.ENSP00000264657	0	FALSE	interacts with	CCL3 (interacts with) STAT3
0.695	0.184	0.74	0	0	0	0	interacts with	CCL3 (interacts with) ICAM1	0	9606.ENSP00000477908	9606.ENSP00000264832	0	FALSE	interacts with	CCL3 (interacts with) ICAM1
0.72	0.068	0.727	0	0	0	0	interacts with	CCL3 (interacts with) IFNA1	0	9606.ENSP00000477908	9606.ENSP00000276927	0	FALSE	interacts with	CCL3 (interacts with) IFNA1
0.773	0.054	0.86	0.4	0	0	0	interacts with	CCL3 (interacts with) IL18	0	9606.ENSP00000477908	9606.ENSP00000280357	0	FALSE	interacts with	CCL3 (interacts with) IL18
0.997	0.144	0.999	0.65	0	0	0	interacts with	CCL3 (interacts with) CCR2	0	9606.ENSP00000477908	9606.ENSP00000292301	0	FALSE	interacts with	CCL3 (interacts with) CCR2
0.877	0.196	0.935	0.4	0	0	0	interacts with	CCL3 (interacts with) CSF2	0	9606.ENSP00000477908	9606.ENSP00000296871	0	FALSE	interacts with	CCL3 (interacts with) CSF2
0.89	0.082	0.895	0	0	0	0	interacts with	CCL3 (interacts with) IL13	0	9606.ENSP00000477908	9606.ENSP00000304915	0	FALSE	interacts with	CCL3 (interacts with) IL13
0.893	0.303	0.951	0.4	0	0	0	interacts with	CCL3 (interacts with) CXCL10	0	9606.ENSP00000477908	9606.ENSP00000305651	0	FALSE	interacts with	CCL3 (interacts with) CXCL10
0.931	0.497	0.977	0.4	0	0	0	interacts with	CCL3 (interacts with) CXCL8	0	9606.ENSP00000477908	9606.ENSP00000306512	0	FALSE	interacts with	CCL3 (interacts with) CXCL8
0.697	0.139	0.728	0	0	0	0	interacts with	CCL3 (interacts with) CSF1	0	9606.ENSP00000477908	9606.ENSP00000327513	0	FALSE	interacts with	CCL3 (interacts with) CSF1
0.912	0.11	0.97	0.65	0	0	0	interacts with	CCL3 (interacts with) CX3CR1	0	9606.ENSP00000477908	9606.ENSP00000351059	0	FALSE	interacts with	CCL3 (interacts with) CX3CR1
0.85	0.257	0.884	0	0	0	0	interacts with	CCL3 (interacts with) CXCL9	0	9606.ENSP00000477908	9606.ENSP00000354901	0	FALSE	interacts with	CCL3 (interacts with) CXCL9
0.72	0.252	0.781	0	0	0	0	interacts with	CCL3 (interacts with) PTGS2	0	9606.ENSP00000477908	9606.ENSP00000356438	0	FALSE	interacts with	CCL3 (interacts with) PTGS2
0.792	0.149	0.815	0	0	0	0	interacts with	CCL3 (interacts with) TLR4	0	9606.ENSP00000477908	9606.ENSP00000363089	0	FALSE	interacts with	CCL3 (interacts with) TLR4
0.808	0.116	0.823	0	0	0	0	interacts with	CCL3 (interacts with) CXCL12	0	9606.ENSP00000477908	9606.ENSP00000379140	0	FALSE	interacts with	CCL3 (interacts with) CXCL12
0.743	0.079	0.753	0	0	0	0	interacts with	CCL3 (interacts with) BCL2	0	9606.ENSP00000477908	9606.ENSP00000381185	0	FALSE	interacts with	CCL3 (interacts with) BCL2
0.919	0.277	0.962	0.4	0	0	0	interacts with	CCL3 (interacts with) IL6	0	9606.ENSP00000477908	9606.ENSP00000385675	0	FALSE	interacts with	CCL3 (interacts with) IL6
0.863	0.111	0.873	0	0	0	0	interacts with	CCL3 (interacts with) CD8A	0	9606.ENSP00000477908	9606.ENSP00000386559	0	FALSE	interacts with	CCL3 (interacts with) CD8A
0.924	0.774	0.988	0.4	0	0	0	interacts with	CCL3 (interacts with) TNF	0	9606.ENSP00000477908	9606.ENSP00000398698	0	FALSE	interacts with	CCL3 (interacts with) TNF
0.705	0	0.705	0	0	0	0	interacts with	CCL3 (interacts with) TGFA	0	9606.ENSP00000477908	9606.ENSP00000404131	0	FALSE	interacts with	CCL3 (interacts with) TGFA
0.944	0.227	0.972	0.4	0	0	0	interacts with	CCL3 (interacts with) IL10	0	9606.ENSP00000477908	9606.ENSP00000412237	0	FALSE	interacts with	CCL3 (interacts with) IL10
0.836	0.166	0.913	0.4	0	0	0.938	interacts with	CCL3 (interacts with) CCL5	0	9606.ENSP00000477908	9606.ENSP00000474412	0.069	FALSE	interacts with	CCL3 (interacts with) CCL5
0.669	0.164	0.711	0	0	0	0	interacts with	CCL3 (interacts with) ITGAM	0	9606.ENSP00000477908	9606.ENSP00000496959	0	FALSE	interacts with	CCL3 (interacts with) ITGAM
0.842	0.072	0.847	0	0	0	0	interacts with	CCL3 (interacts with) IL17A	0	9606.ENSP00000477908	9606.ENSP00000497968	0	FALSE	interacts with	CCL3 (interacts with) IL17A
0.943	0.921	0.997	0.4	0.292	0	0.953	interacts with	CCL3 (interacts with) CCL4	0	9606.ENSP00000477908	9606.ENSP00000482259	0.063	FALSE	interacts with	CCL3 (interacts with) CCL4
0.929	0.136	0.939	0	0.099	0	0	interacts with	CCL4 (interacts with) CD4	0	9606.ENSP00000482259	9606.ENSP00000011653	0	FALSE	interacts with	CCL4 (interacts with) CD4
0.942	0.073	0.943	0	0	0	0	interacts with	CCL4 (interacts with) CCL17	0	9606.ENSP00000482259	9606.ENSP00000219244	0	FALSE	interacts with	CCL4 (interacts with) CCL17
0.848	0.083	0.909	0.4	0	0	0	interacts with	CCL4 (interacts with) CSF3	0	9606.ENSP00000482259	9606.ENSP00000225474	0	FALSE	interacts with	CCL4 (interacts with) CSF3
0.478	0.154	0.787	0.4	0.292	0	0.867	interacts with	CCL4 (interacts with) CCL2	0	9606.ENSP00000482259	9606.ENSP00000225831	0	FALSE	interacts with	CCL4 (interacts with) CCL2
0.819	0.068	0.824	0	0	0	0	interacts with	CCL4 (interacts with) IL2	0	9606.ENSP00000482259	9606.ENSP00000226730	0	FALSE	interacts with	CCL4 (interacts with) IL2
0.916	0.343	0.942	0	0	0	0	interacts with	CCL4 (interacts with) IFNG	0	9606.ENSP00000482259	9606.ENSP00000229135	0	FALSE	interacts with	CCL4 (interacts with) IFNG
0.802	0.059	0.805	0	0	0	0	interacts with	CCL4 (interacts with) IL4	0	9606.ENSP00000482259	9606.ENSP00000231449	0	FALSE	interacts with	CCL4 (interacts with) IL4
0.826	0.042	0.826	0	0	0	0	interacts with	CCL4 (interacts with) IL5	0	9606.ENSP00000482259	9606.ENSP00000231454	0	FALSE	interacts with	CCL4 (interacts with) IL5
0.709	0.219	0.763	0	0	0	0	interacts with	CCL4 (interacts with) TLR2	0	9606.ENSP00000482259	9606.ENSP00000260010	0	FALSE	interacts with	CCL4 (interacts with) TLR2
0.862	0.124	0.921	0.4	0	0	0	interacts with	CCL4 (interacts with) IL1A	0	9606.ENSP00000482259	9606.ENSP00000263339	0	FALSE	interacts with	CCL4 (interacts with) IL1A
0.872	0.292	0.94	0.4	0	0	0	interacts with	CCL4 (interacts with) IL1B	0	9606.ENSP00000482259	9606.ENSP00000263341	0	FALSE	interacts with	CCL4 (interacts with) IL1B
0.51	0.05	0.746	0.5	0	0	0	interacts with	CCL4 (interacts with) STAT3	0	9606.ENSP00000482259	9606.ENSP00000264657	0	FALSE	interacts with	CCL4 (interacts with) STAT3
0.725	0.174	0.763	0	0	0	0	interacts with	CCL4 (interacts with) ICAM1	0	9606.ENSP00000482259	9606.ENSP00000264832	0	FALSE	interacts with	CCL4 (interacts with) ICAM1
0.717	0.056	0.721	0	0	0	0	interacts with	CCL4 (interacts with) IFNA1	0	9606.ENSP00000482259	9606.ENSP00000276927	0	FALSE	interacts with	CCL4 (interacts with) IFNA1
0.723	0.055	0.829	0.4	0	0	0	interacts with	CCL4 (interacts with) IL18	0	9606.ENSP00000482259	9606.ENSP00000280357	0	FALSE	interacts with	CCL4 (interacts with) IL18
0.997	0.1	0.999	0.65	0	0	0	interacts with	CCL4 (interacts with) CCR2	0	9606.ENSP00000482259	9606.ENSP00000292301	0	FALSE	interacts with	CCL4 (interacts with) CCR2
0.871	0.1	0.924	0.4	0	0	0	interacts with	CCL4 (interacts with) CSF2	0	9606.ENSP00000482259	9606.ENSP00000296871	0	FALSE	interacts with	CCL4 (interacts with) CSF2
0.826	0.062	0.83	0	0	0	0	interacts with	CCL4 (interacts with) IL13	0	9606.ENSP00000482259	9606.ENSP00000304915	0	FALSE	interacts with	CCL4 (interacts with) IL13
0.889	0.328	0.959	0.5	0	0	0	interacts with	CCL4 (interacts with) CXCL10	0	9606.ENSP00000482259	9606.ENSP00000305651	0	FALSE	interacts with	CCL4 (interacts with) CXCL10
0.969	0.282	0.988	0.5	0	0	0	interacts with	CCL4 (interacts with) CXCL8	0	9606.ENSP00000482259	9606.ENSP00000306512	0	FALSE	interacts with	CCL4 (interacts with) CXCL8
0.583	0.072	0.852	0.65	0	0	0	interacts with	CCL4 (interacts with) CX3CR1	0	9606.ENSP00000482259	9606.ENSP00000351059	0	FALSE	interacts with	CCL4 (interacts with) CX3CR1
0.889	0.32	0.959	0.5	0	0	0	interacts with	CCL4 (interacts with) CXCL9	0	9606.ENSP00000482259	9606.ENSP00000354901	0	FALSE	interacts with	CCL4 (interacts with) CXCL9
0.731	0.108	0.749	0	0	0	0	interacts with	CCL4 (interacts with) TLR4	0	9606.ENSP00000482259	9606.ENSP00000363089	0	FALSE	interacts with	CCL4 (interacts with) TLR4
0.875	0.072	0.948	0.5	0	0	0	interacts with	CCL4 (interacts with) CXCL12	0	9606.ENSP00000482259	9606.ENSP00000379140	0.219	FALSE	interacts with	CCL4 (interacts with) CXCL12
0.876	0.17	0.933	0.4	0	0	0	interacts with	CCL4 (interacts with) IL6	0	9606.ENSP00000482259	9606.ENSP00000385675	0	FALSE	interacts with	CCL4 (interacts with) IL6
0.861	0.24	0.889	0	0	0	0	interacts with	CCL4 (interacts with) CD8A	0	9606.ENSP00000482259	9606.ENSP00000386559	0	FALSE	interacts with	CCL4 (interacts with) CD8A
0.909	0.446	0.967	0.4	0	0	0	interacts with	CCL4 (interacts with) TNF	0	9606.ENSP00000482259	9606.ENSP00000398698	0	FALSE	interacts with	CCL4 (interacts with) TNF
0.873	0.228	0.936	0.4	0	0	0	interacts with	CCL4 (interacts with) IL10	0	9606.ENSP00000482259	9606.ENSP00000412237	0	FALSE	interacts with	CCL4 (interacts with) IL10
0.874	0.301	0.953	0.5	0	0	0.93	interacts with	CCL4 (interacts with) CCL5	0	9606.ENSP00000482259	9606.ENSP00000474412	0.072	FALSE	interacts with	CCL4 (interacts with) CCL5
0.943	0.921	0.997	0.4	0.292	0	0.953	interacts with	CCL4 (interacts with) CCL3	0	9606.ENSP00000482259	9606.ENSP00000477908	0.063	FALSE	interacts with	CCL4 (interacts with) CCL3
0.82	0.049	0.822	0	0	0	0	interacts with	CCL4 (interacts with) IL17A	0	9606.ENSP00000482259	9606.ENSP00000497968	0	FALSE	interacts with	CCL4 (interacts with) IL17A
0.871	0.102	0.887	0	0.099	0	0	interacts with	CCL5 (interacts with) CD4	0	9606.ENSP00000474412	9606.ENSP00000011653	0	FALSE	interacts with	CCL5 (interacts with) CD4
0.729	0.082	0.74	0	0	0	0	interacts with	CCL5 (interacts with) TIMP1	0	9606.ENSP00000474412	9606.ENSP00000218388	0	FALSE	interacts with	CCL5 (interacts with) TIMP1
0.606	0.06	0.999	0.9	0.994	0	0.805	interacts with	CCL5 (interacts with) CCL17	0	9606.ENSP00000474412	9606.ENSP00000219244	0	FALSE	interacts with	CCL5 (interacts with) CCL17
0.726	0.044	0.726	0	0	0	0	interacts with	CCL5 (interacts with) SERPINE1	0	9606.ENSP00000474412	9606.ENSP00000223095	0	FALSE	interacts with	CCL5 (interacts with) SERPINE1
0.894	0.047	0.934	0.4	0	0	0	interacts with	CCL5 (interacts with) CSF3	0	9606.ENSP00000474412	9606.ENSP00000225474	0	FALSE	interacts with	CCL5 (interacts with) CSF3
0.882	0.156	0.999	0.4	0.994	0	0.825	interacts with	CCL5 (interacts with) CCL2	0	9606.ENSP00000474412	9606.ENSP00000225831	0	FALSE	interacts with	CCL5 (interacts with) CCL2
0.748	0.116	0.975	0.9	0	0	0	interacts with	CCL5 (interacts with) NFKB1	0	9606.ENSP00000474412	9606.ENSP00000226574	0	FALSE	interacts with	CCL5 (interacts with) NFKB1
0.812	0.044	0.813	0	0	0	0	interacts with	CCL5 (interacts with) IL2	0	9606.ENSP00000474412	9606.ENSP00000226730	0	FALSE	interacts with	CCL5 (interacts with) IL2
0.892	0.297	0.921	0	0	0	0	interacts with	CCL5 (interacts with) IFNG	0	9606.ENSP00000474412	9606.ENSP00000229135	0	FALSE	interacts with	CCL5 (interacts with) IFNG
0.827	0.045	0.828	0	0	0	0	interacts with	CCL5 (interacts with) IL4	0	9606.ENSP00000474412	9606.ENSP00000231449	0	FALSE	interacts with	CCL5 (interacts with) IL4
0.836	0	0.836	0	0	0	0	interacts with	CCL5 (interacts with) IL5	0	9606.ENSP00000474412	9606.ENSP00000231454	0	FALSE	interacts with	CCL5 (interacts with) IL5
0.707	0	0.707	0	0	0	0	interacts with	CCL5 (interacts with) CRP	0	9606.ENSP00000474412	9606.ENSP00000255030	0	FALSE	interacts with	CCL5 (interacts with) CRP
0.722	0.129	0.747	0	0	0	0	interacts with	CCL5 (interacts with) IL1RN	0	9606.ENSP00000474412	9606.ENSP00000259206	0	FALSE	interacts with	CCL5 (interacts with) IL1RN
0.696	0.177	0.739	0	0	0	0	interacts with	CCL5 (interacts with) TLR2	0	9606.ENSP00000474412	9606.ENSP00000260010	0	FALSE	interacts with	CCL5 (interacts with) TLR2
0.832	0.087	0.9	0.4	0	0	0	interacts with	CCL5 (interacts with) IL1A	0	9606.ENSP00000474412	9606.ENSP00000263339	0	FALSE	interacts with	CCL5 (interacts with) IL1A
0.888	0.148	0.938	0.4	0	0	0	interacts with	CCL5 (interacts with) IL1B	0	9606.ENSP00000474412	9606.ENSP00000263341	0	FALSE	interacts with	CCL5 (interacts with) IL1B
0.678	0.064	0.836	0.5	0	0	0	interacts with	CCL5 (interacts with) STAT3	0	9606.ENSP00000474412	9606.ENSP00000264657	0	FALSE	interacts with	CCL5 (interacts with) STAT3
0.784	0.133	0.805	0	0	0	0	interacts with	CCL5 (interacts with) ICAM1	0	9606.ENSP00000474412	9606.ENSP00000264832	0	FALSE	interacts with	CCL5 (interacts with) ICAM1
0.761	0.076	0.769	0	0	0	0	interacts with	CCL5 (interacts with) IFNA1	0	9606.ENSP00000474412	9606.ENSP00000276927	0	FALSE	interacts with	CCL5 (interacts with) IFNA1
0.769	0.054	0.858	0.4	0	0	0	interacts with	CCL5 (interacts with) IL18	0	9606.ENSP00000474412	9606.ENSP00000280357	0	FALSE	interacts with	CCL5 (interacts with) IL18
0.998	0.133	0.999	0.65	0.045	0	0	interacts with	CCL5 (interacts with) CCR2	0	9606.ENSP00000474412	9606.ENSP00000292301	0	FALSE	interacts with	CCL5 (interacts with) CCR2
0.871	0.076	0.922	0.4	0	0	0	interacts with	CCL5 (interacts with) CSF2	0	9606.ENSP00000474412	9606.ENSP00000296871	0	FALSE	interacts with	CCL5 (interacts with) CSF2
0.834	0	0.834	0	0	0	0	interacts with	CCL5 (interacts with) IL13	0	9606.ENSP00000474412	9606.ENSP00000304915	0	FALSE	interacts with	CCL5 (interacts with) IL13
0.95	0.362	0.999	0.5	0.994	0	0	interacts with	CCL5 (interacts with) CXCL10	0	9606.ENSP00000474412	9606.ENSP00000305651	0	FALSE	interacts with	CCL5 (interacts with) CXCL10
0.937	0.217	0.98	0.5	0.292	0	0	interacts with	CCL5 (interacts with) CXCL8	0	9606.ENSP00000474412	9606.ENSP00000306512	0	FALSE	interacts with	CCL5 (interacts with) CXCL8
0.724	0.07	0.732	0	0	0	0	interacts with	CCL5 (interacts with) CSF1	0	9606.ENSP00000474412	9606.ENSP00000327513	0	FALSE	interacts with	CCL5 (interacts with) CSF1
0.981	0.126	0.993	0.65	0.045	0	0	interacts with	CCL5 (interacts with) CX3CR1	0	9606.ENSP00000474412	9606.ENSP00000351059	0	FALSE	interacts with	CCL5 (interacts with) CX3CR1
0.727	0.151	0.773	0	0.099	0	0	interacts with	CCL5 (interacts with) CD163	0	9606.ENSP00000474412	9606.ENSP00000352071	0	FALSE	interacts with	CCL5 (interacts with) CD163
0.948	0.371	0.999	0.5	0.994	0	0	interacts with	CCL5 (interacts with) CXCL9	0	9606.ENSP00000474412	9606.ENSP00000354901	0	FALSE	interacts with	CCL5 (interacts with) CXCL9
0.812	0.097	0.823	0	0	0	0	interacts with	CCL5 (interacts with) PTGS2	0	9606.ENSP00000474412	9606.ENSP00000356438	0	FALSE	interacts with	CCL5 (interacts with) PTGS2
0.729	0.257	0.79	0	0	0	0	interacts with	CCL5 (interacts with) FASLG	0	9606.ENSP00000474412	9606.ENSP00000356694	0	FALSE	interacts with	CCL5 (interacts with) FASLG
0.799	0.106	0.813	0	0	0	0	interacts with	CCL5 (interacts with) MMP9	0	9606.ENSP00000474412	9606.ENSP00000361405	0	FALSE	interacts with	CCL5 (interacts with) MMP9
0.804	0.118	0.82	0	0	0	0	interacts with	CCL5 (interacts with) TLR4	0	9606.ENSP00000474412	9606.ENSP00000363089	0	FALSE	interacts with	CCL5 (interacts with) TLR4
0.904	0.062	0.999	0.5	0.994	0	0	interacts with	CCL5 (interacts with) CXCL12	0	9606.ENSP00000474412	9606.ENSP00000379140	0	FALSE	interacts with	CCL5 (interacts with) CXCL12
0.912	0.127	0.95	0.4	0	0	0	interacts with	CCL5 (interacts with) IL6	0	9606.ENSP00000474412	9606.ENSP00000385675	0	FALSE	interacts with	CCL5 (interacts with) IL6
0.874	0.692	0.959	0	0	0	0	interacts with	CCL5 (interacts with) CD8A	0	9606.ENSP00000474412	9606.ENSP00000386559	0	FALSE	interacts with	CCL5 (interacts with) CD8A
0.924	0.202	0.96	0.4	0	0	0	interacts with	CCL5 (interacts with) TNF	0	9606.ENSP00000474412	9606.ENSP00000398698	0	FALSE	interacts with	CCL5 (interacts with) TNF
0.65	0.236	0.721	0	0	0	0	interacts with	CCL5 (interacts with) PTPRC	0	9606.ENSP00000474412	9606.ENSP00000411355	0	FALSE	interacts with	CCL5 (interacts with) PTPRC
0.89	0.229	0.945	0.4	0	0	0	interacts with	CCL5 (interacts with) IL10	0	9606.ENSP00000474412	9606.ENSP00000412237	0	FALSE	interacts with	CCL5 (interacts with) IL10
0.712	0.083	0.725	0	0	0	0	interacts with	CCL5 (interacts with) AKT1	0	9606.ENSP00000474412	9606.ENSP00000451828	0	FALSE	interacts with	CCL5 (interacts with) AKT1
0.732	0.159	0.765	0	0	0	0	interacts with	CCL5 (interacts with) IFIH1	0	9606.ENSP00000474412	9606.ENSP00000497271	0	FALSE	interacts with	CCL5 (interacts with) IFIH1
0.802	0.194	0.833	0	0	0	0	interacts with	CCL5 (interacts with) ITGAM	0	9606.ENSP00000474412	9606.ENSP00000496959	0	FALSE	interacts with	CCL5 (interacts with) ITGAM
0.849	0	0.849	0	0	0	0	interacts with	CCL5 (interacts with) IL17A	0	9606.ENSP00000474412	9606.ENSP00000497968	0	FALSE	interacts with	CCL5 (interacts with) IL17A
0.836	0.166	0.913	0.4	0	0	0.938	interacts with	CCL5 (interacts with) CCL3	0	9606.ENSP00000474412	9606.ENSP00000477908	0.069	FALSE	interacts with	CCL5 (interacts with) CCL3
0.874	0.301	0.953	0.5	0	0	0.93	interacts with	CCL5 (interacts with) CCL4	0	9606.ENSP00000474412	9606.ENSP00000482259	0.072	FALSE	interacts with	CCL5 (interacts with) CCL4
0.8	0.119	0.816	0	0	0	0	interacts with	CCN2 (interacts with) TIMP1	0	9606.ENSP00000356954	9606.ENSP00000218388	0	FALSE	interacts with	CCN2 (interacts with) TIMP1
0.813	0.175	0.839	0	0	0	0	interacts with	CCN2 (interacts with) MMP2	0	9606.ENSP00000356954	9606.ENSP00000219070	0	FALSE	interacts with	CCN2 (interacts with) MMP2
0.967	0.102	0.969	0	0	0	0	interacts with	CCN2 (interacts with) TGFB1	0	9606.ENSP00000356954	9606.ENSP00000221930	0	FALSE	interacts with	CCN2 (interacts with) TGFB1
0.731	0.354	0.819	0	0	0	0	interacts with	CCN2 (interacts with) SERPINE1	0	9606.ENSP00000356954	9606.ENSP00000223095	0	FALSE	interacts with	CCN2 (interacts with) SERPINE1
0.848	0.214	0.876	0	0	0	0	interacts with	CCN2 (interacts with) COL1A1	0	9606.ENSP00000356954	9606.ENSP00000225964	0	FALSE	interacts with	CCN2 (interacts with) COL1A1
0.842	0.062	0.845	0	0	0	0	interacts with	CCN2 (interacts with) SMAD2	0	9606.ENSP00000356954	9606.ENSP00000262160	0	FALSE	interacts with	CCN2 (interacts with) SMAD2
0.776	0.145	0.8	0	0	0	0	interacts with	CCN2 (interacts with) FGF2	0	9606.ENSP00000356954	9606.ENSP00000264498	0	FALSE	interacts with	CCN2 (interacts with) FGF2
0.694	0.146	0.799	0	0.292	0	0	interacts with	CCN2 (interacts with) EGFR	0	9606.ENSP00000356954	9606.ENSP00000275493	0	FALSE	interacts with	CCN2 (interacts with) EGFR
0.735	0.102	0.751	0	0	0	0	interacts with	CCN2 (interacts with) SMAD3	0	9606.ENSP00000356954	9606.ENSP00000332973	0	FALSE	interacts with	CCN2 (interacts with) SMAD3
0.939	0.216	0.963	0	0.292	0	0	interacts with	CCN2 (interacts with) FN1	0	9606.ENSP00000356954	9606.ENSP00000346839	0	FALSE	interacts with	CCN2 (interacts with) FN1
0.675	0.188	0.725	0	0	0	0	interacts with	CCN2 (interacts with) TGFB2	0	9606.ENSP00000356954	9606.ENSP00000355896	0	FALSE	interacts with	CCN2 (interacts with) TGFB2
0.723	0.102	0.74	0	0	0	0	interacts with	CCN2 (interacts with) TNF	0	9606.ENSP00000356954	9606.ENSP00000398698	0	FALSE	interacts with	CCN2 (interacts with) TNF
0.743	0.062	0.748	0	0	0	0	interacts with	CCN2 (interacts with) HIF1A	0	9606.ENSP00000356954	9606.ENSP00000437955	0	FALSE	interacts with	CCN2 (interacts with) HIF1A
0.736	0.168	0.771	0	0	0	0	interacts with	CCN2 (interacts with) IL6	0	9606.ENSP00000356954	9606.ENSP00000385675	0	FALSE	interacts with	CCN2 (interacts with) IL6
0.751	0.179	0.787	0	0	0	0	interacts with	CCN2 (interacts with) EDN1	0	9606.ENSP00000356954	9606.ENSP00000368683	0	FALSE	interacts with	CCN2 (interacts with) EDN1
0.802	0	0.802	0	0	0	0	interacts with	CCN2 (interacts with) AKT1	0	9606.ENSP00000356954	9606.ENSP00000451828	0	FALSE	interacts with	CCN2 (interacts with) AKT1
0.809	0	0.809	0	0	0	0	interacts with	CCN2 (interacts with) MMP9	0	9606.ENSP00000356954	9606.ENSP00000361405	0	FALSE	interacts with	CCN2 (interacts with) MMP9
0.829	0.049	0.83	0	0	0	0	interacts with	CCN2 (interacts with) IGF1	0	9606.ENSP00000356954	9606.ENSP00000376637	0	FALSE	interacts with	CCN2 (interacts with) IGF1
0.888	0.184	0.909	0	0.091	0	0	interacts with	CCR2 (interacts with) CD4	0	9606.ENSP00000292301	9606.ENSP00000011653	0	FALSE	interacts with	CCR2 (interacts with) CD4
0.852	0	0.946	0.65	0.045	0	0	interacts with	CCR2 (interacts with) CCL17	0	9606.ENSP00000292301	9606.ENSP00000219244	0	FALSE	interacts with	CCR2 (interacts with) CCL17
0.999	0.084	0.999	0.9	0.949	0	0	interacts with	CCR2 (interacts with) CCL2	0	9606.ENSP00000292301	9606.ENSP00000225831	0	FALSE	interacts with	CCR2 (interacts with) CCL2
0.736	0.092	0.751	0	0	0	0	interacts with	CCR2 (interacts with) IL2	0	9606.ENSP00000292301	9606.ENSP00000226730	0	FALSE	interacts with	CCR2 (interacts with) IL2
0.819	0.133	0.837	0	0	0	0	interacts with	CCR2 (interacts with) IFNG	0	9606.ENSP00000292301	9606.ENSP00000229135	0	FALSE	interacts with	CCR2 (interacts with) IFNG
0.771	0.11	0.788	0	0	0	0	interacts with	CCR2 (interacts with) CD68	0	9606.ENSP00000292301	9606.ENSP00000250092	0	FALSE	interacts with	CCR2 (interacts with) CD68
0.734	0.147	0.764	0	0	0	0	interacts with	CCR2 (interacts with) TLR2	0	9606.ENSP00000292301	9606.ENSP00000260010	0	FALSE	interacts with	CCR2 (interacts with) TLR2
0.704	0	0.704	0	0	0	0	interacts with	CCR2 (interacts with) IL1A	0	9606.ENSP00000292301	9606.ENSP00000263339	0	FALSE	interacts with	CCR2 (interacts with) IL1A
0.852	0.134	0.867	0	0	0	0	interacts with	CCR2 (interacts with) IL1B	0	9606.ENSP00000292301	9606.ENSP00000263341	0	FALSE	interacts with	CCR2 (interacts with) IL1B
0.597	0.049	0.791	0.5	0	0	0	interacts with	CCR2 (interacts with) STAT3	0	9606.ENSP00000292301	9606.ENSP00000264657	0	FALSE	interacts with	CCR2 (interacts with) STAT3
0.809	0.106	0.822	0	0	0	0	interacts with	CCR2 (interacts with) ICAM1	0	9606.ENSP00000292301	9606.ENSP00000264832	0	FALSE	interacts with	CCR2 (interacts with) ICAM1
0.721	0.08	0.732	0	0	0	0	interacts with	CCR2 (interacts with) ARG1	0	9606.ENSP00000292301	9606.ENSP00000349446	0	FALSE	interacts with	CCR2 (interacts with) ARG1
0.684	0.206	0.738	0	0	0	0	interacts with	CCR2 (interacts with) TLR4	0	9606.ENSP00000292301	9606.ENSP00000363089	0	FALSE	interacts with	CCR2 (interacts with) TLR4
0.72	0.107	0.739	0	0	0	0	interacts with	CCR2 (interacts with) MRC1	0	9606.ENSP00000292301	9606.ENSP00000455897	0	FALSE	interacts with	CCR2 (interacts with) MRC1
0.751	0.043	0.751	0	0	0	0	interacts with	CCR2 (interacts with) IL17A	0	9606.ENSP00000292301	9606.ENSP00000497968	0	FALSE	interacts with	CCR2 (interacts with) IL17A
0.732	0.12	0.754	0	0	0	0	interacts with	CCR2 (interacts with) ITGAX	0	9606.ENSP00000292301	9606.ENSP00000454623	0	FALSE	interacts with	CCR2 (interacts with) ITGAX
0.761	0.084	0.771	0	0	0	0	interacts with	CCR2 (interacts with) TNF	0	9606.ENSP00000292301	9606.ENSP00000398698	0	FALSE	interacts with	CCR2 (interacts with) TNF
0.72	0.296	0.794	0	0	0	0	interacts with	CCR2 (interacts with) PTPRC	0	9606.ENSP00000292301	9606.ENSP00000411355	0	FALSE	interacts with	CCR2 (interacts with) PTPRC
0.797	0.179	0.826	0	0	0	0	interacts with	CCR2 (interacts with) ITGAM	0	9606.ENSP00000292301	9606.ENSP00000496959	0	FALSE	interacts with	CCR2 (interacts with) ITGAM
0.798	0.148	0.83	0	0.091	0	0	interacts with	CCR2 (interacts with) CD163	0	9606.ENSP00000292301	9606.ENSP00000352071	0	FALSE	interacts with	CCR2 (interacts with) CD163
0.577	0.256	0.835	0.5	0	0	0.882	interacts with	CCR2 (interacts with) CX3CR1	0	9606.ENSP00000292301	9606.ENSP00000351059	0.079	FALSE	interacts with	CCR2 (interacts with) CX3CR1
0.837	0	0.837	0	0	0	0	interacts with	CCR2 (interacts with) CSF1	0	9606.ENSP00000292301	9606.ENSP00000327513	0	FALSE	interacts with	CCR2 (interacts with) CSF1
0.514	0.131	0.839	0.65	0	0	0	interacts with	CCR2 (interacts with) CCL18	0	9606.ENSP00000292301	9606.ENSP00000479955	0	FALSE	interacts with	CCR2 (interacts with) CCL18
0.819	0.155	0.84	0	0	0	0	interacts with	CCR2 (interacts with) CD8A	0	9606.ENSP00000292301	9606.ENSP00000386559	0	FALSE	interacts with	CCR2 (interacts with) CD8A
0.792	0.103	0.878	0.4	0	0	0	interacts with	CCR2 (interacts with) IL10	0	9606.ENSP00000292301	9606.ENSP00000412237	0	FALSE	interacts with	CCR2 (interacts with) IL10
0.879	0	0.879	0	0	0	0	interacts with	CCR2 (interacts with) IL6	0	9606.ENSP00000292301	9606.ENSP00000385675	0	FALSE	interacts with	CCR2 (interacts with) IL6
0.979	0.137	0.993	0.65	0	0	0	interacts with	CCR2 (interacts with) CXCL9	0	9606.ENSP00000292301	9606.ENSP00000354901	0	FALSE	interacts with	CCR2 (interacts with) CXCL9
0.997	0.05	0.998	0.65	0.046	0	0	interacts with	CCR2 (interacts with) CXCL12	0	9606.ENSP00000292301	9606.ENSP00000379140	0	FALSE	interacts with	CCR2 (interacts with) CXCL12
0.995	0.06	0.998	0.65	0	0	0	interacts with	CCR2 (interacts with) CXCL8	0	9606.ENSP00000292301	9606.ENSP00000306512	0	FALSE	interacts with	CCR2 (interacts with) CXCL8
0.995	0.139	0.998	0.65	0	0	0	interacts with	CCR2 (interacts with) CXCL10	0	9606.ENSP00000292301	9606.ENSP00000305651	0	FALSE	interacts with	CCR2 (interacts with) CXCL10
0.998	0.133	0.999	0.65	0.045	0	0	interacts with	CCR2 (interacts with) CCL5	0	9606.ENSP00000292301	9606.ENSP00000474412	0	FALSE	interacts with	CCR2 (interacts with) CCL5
0.997	0.1	0.999	0.65	0	0	0	interacts with	CCR2 (interacts with) CCL4	0	9606.ENSP00000292301	9606.ENSP00000482259	0	FALSE	interacts with	CCR2 (interacts with) CCL4
0.997	0.144	0.999	0.65	0	0	0	interacts with	CCR2 (interacts with) CCL3	0	9606.ENSP00000292301	9606.ENSP00000477908	0	FALSE	interacts with	CCR2 (interacts with) CCL3
0.706	0.485	0.992	0.9	0.541	0	0	interacts with	CD14 (interacts with) TLR2	0	9606.ENSP00000385519	9606.ENSP00000260010	0	FALSE	interacts with	CD14 (interacts with) TLR2
0.939	0.345	0.995	0.9	0	0	0	interacts with	CD14 (interacts with) TLR4	0	9606.ENSP00000385519	9606.ENSP00000363089	0	FALSE	interacts with	CD14 (interacts with) TLR4
0.308	0.338	0.75	0.5	0	0	0	interacts with	CD14 (interacts with) ITGAM	0	9606.ENSP00000385519	9606.ENSP00000496959	0	FALSE	interacts with	CD14 (interacts with) ITGAM
0.772	0.186	0.806	0	0	0	0	interacts with	CD163 (interacts with) CD4	0	9606.ENSP00000352071	9606.ENSP00000011653	0	FALSE	interacts with	CD163 (interacts with) CD4
0.745	0.136	0.784	0	0.099	0	0	interacts with	CD163 (interacts with) CCL2	0	9606.ENSP00000352071	9606.ENSP00000225831	0	FALSE	interacts with	CD163 (interacts with) CCL2
0.737	0.09	0.751	0	0	0	0	interacts with	CD163 (interacts with) IFNG	0	9606.ENSP00000352071	9606.ENSP00000229135	0	FALSE	interacts with	CD163 (interacts with) IFNG
0.746	0	0.746	0	0	0	0	interacts with	CD163 (interacts with) IL4	0	9606.ENSP00000352071	9606.ENSP00000231449	0	FALSE	interacts with	CD163 (interacts with) IL4
0.902	0.203	0.919	0	0	0	0	interacts with	CD163 (interacts with) CD68	0	9606.ENSP00000352071	9606.ENSP00000250092	0	FALSE	interacts with	CD163 (interacts with) CD68
0.7	0.438	0.835	0	0.097	0	0	interacts with	CD163 (interacts with) TLR2	0	9606.ENSP00000352071	9606.ENSP00000260010	0	FALSE	interacts with	CD163 (interacts with) TLR2
0.82	0.149	0.84	0	0	0	0	interacts with	CD163 (interacts with) IL1B	0	9606.ENSP00000352071	9606.ENSP00000263341	0	FALSE	interacts with	CD163 (interacts with) IL1B
0.798	0.148	0.83	0	0.091	0	0	interacts with	CD163 (interacts with) CCR2	0	9606.ENSP00000352071	9606.ENSP00000292301	0	FALSE	interacts with	CD163 (interacts with) CCR2
0.71	0	0.71	0	0	0	0	interacts with	CD163 (interacts with) IL13	0	9606.ENSP00000352071	9606.ENSP00000304915	0	FALSE	interacts with	CD163 (interacts with) IL13
0.721	0.083	0.734	0	0	0	0	interacts with	CD163 (interacts with) CSF1	0	9606.ENSP00000352071	9606.ENSP00000327513	0	FALSE	interacts with	CD163 (interacts with) CSF1
0.745	0.077	0.78	0	0.137	0	0	interacts with	CD163 (interacts with) ARG1	0	9606.ENSP00000352071	9606.ENSP00000349446	0	FALSE	interacts with	CD163 (interacts with) ARG1
0.774	0.063	0.79	0	0.091	0	0	interacts with	CD163 (interacts with) CX3CR1	0	9606.ENSP00000352071	9606.ENSP00000351059	0	FALSE	interacts with	CD163 (interacts with) CX3CR1
0.722	0.14	0.75	0	0	0	0	interacts with	CD163 (interacts with) TNF	0	9606.ENSP00000352071	9606.ENSP00000398698	0	FALSE	interacts with	CD163 (interacts with) TNF
0.706	0.204	0.763	0	0.067	0	0	interacts with	CD163 (interacts with) ITGAX	0	9606.ENSP00000352071	9606.ENSP00000454623	0	FALSE	interacts with	CD163 (interacts with) ITGAX
0.727	0.151	0.773	0	0.099	0	0	interacts with	CD163 (interacts with) CCL5	0	9606.ENSP00000352071	9606.ENSP00000474412	0	FALSE	interacts with	CD163 (interacts with) CCL5
0.661	0.34	0.78	0	0.099	0	0	interacts with	CD163 (interacts with) CCL18	0	9606.ENSP00000352071	9606.ENSP00000479955	0	FALSE	interacts with	CD163 (interacts with) CCL18
0.722	0.246	0.781	0	0	0	0	interacts with	CD163 (interacts with) CXCL9	0	9606.ENSP00000352071	9606.ENSP00000354901	0	FALSE	interacts with	CD163 (interacts with) CXCL9
0.789	0	0.79	0	0.047	0	0	interacts with	CD163 (interacts with) FOXP3	0	9606.ENSP00000352071	9606.ENSP00000365380	0	FALSE	interacts with	CD163 (interacts with) FOXP3
0.768	0.143	0.797	0	0.064	0	0	interacts with	CD163 (interacts with) CD8A	0	9606.ENSP00000352071	9606.ENSP00000386559	0	FALSE	interacts with	CD163 (interacts with) CD8A
0.737	0.28	0.814	0	0.097	0	0	interacts with	CD163 (interacts with) TLR4	0	9606.ENSP00000352071	9606.ENSP00000363089	0	FALSE	interacts with	CD163 (interacts with) TLR4
0.73	0.341	0.819	0	0.067	0	0	interacts with	CD163 (interacts with) ITGAM	0	9606.ENSP00000352071	9606.ENSP00000496959	0	FALSE	interacts with	CD163 (interacts with) ITGAM
0.807	0.186	0.841	0	0.069	0	0	interacts with	CD163 (interacts with) PTPRC	0	9606.ENSP00000352071	9606.ENSP00000411355	0	FALSE	interacts with	CD163 (interacts with) PTPRC
0.883	0.397	0.93	0	0.091	0	0	interacts with	CD163 (interacts with) MRC1	0	9606.ENSP00000352071	9606.ENSP00000455897	0	FALSE	interacts with	CD163 (interacts with) MRC1
0.814	0.126	0.955	0.75	0	0	0	interacts with	CD163 (interacts with) IL10	0	9606.ENSP00000352071	9606.ENSP00000412237	0	FALSE	interacts with	CD163 (interacts with) IL10
0.855	0.101	0.964	0.75	0	0	0	interacts with	CD163 (interacts with) IL6	0	9606.ENSP00000352071	9606.ENSP00000385675	0	FALSE	interacts with	CD163 (interacts with) IL6
0.698	0	0.7	0	0.049	0	0	interacts with	CD4 (interacts with) CTNNB1	0	9606.ENSP00000011653	9606.ENSP00000495360	0	FALSE	interacts with	CD4 (interacts with) CTNNB1
0.661	0.109	0.701	0	0.092	0	0	interacts with	CD4 (interacts with) MMP9	0	9606.ENSP00000011653	9606.ENSP00000361405	0	FALSE	interacts with	CD4 (interacts with) MMP9
0.702	0	0.702	0	0	0	0	interacts with	CD4 (interacts with) TGFB2	0	9606.ENSP00000011653	9606.ENSP00000355896	0	FALSE	interacts with	CD4 (interacts with) TGFB2
0.697	0.06	0.703	0	0	0	0	interacts with	CD4 (interacts with) TP53	0	9606.ENSP00000011653	9606.ENSP00000269305	0	FALSE	interacts with	CD4 (interacts with) TP53
0.687	0.12	0.715	0	0.046	0	0	interacts with	CD4 (interacts with) CASP1	0	9606.ENSP00000011653	9606.ENSP00000433138	0	FALSE	interacts with	CD4 (interacts with) CASP1
0.692	0.067	0.718	0	0.099	0	0	interacts with	CD4 (interacts with) CCL17	0	9606.ENSP00000011653	9606.ENSP00000219244	0	FALSE	interacts with	CD4 (interacts with) CCL17
0.728	0.044	0.729	0	0	0	0	interacts with	CD4 (interacts with) IL33	0	9606.ENSP00000011653	9606.ENSP00000370842	0	FALSE	interacts with	CD4 (interacts with) IL33
0.734	0	0.734	0	0	0	0	interacts with	CD4 (interacts with) CSF3	0	9606.ENSP00000011653	9606.ENSP00000225474	0	FALSE	interacts with	CD4 (interacts with) CSF3
0.72	0.123	0.757	0	0.091	0	0	interacts with	CD4 (interacts with) MRC1	0	9606.ENSP00000011653	9606.ENSP00000455897	0	FALSE	interacts with	CD4 (interacts with) MRC1
0.734	0	0.759	0	0.131	0	0	interacts with	CD4 (interacts with) GAPDH	0	9606.ENSP00000011653	9606.ENSP00000380070	0	FALSE	interacts with	CD4 (interacts with) GAPDH
0.727	0.068	0.761	0	0.137	0	0	interacts with	CD4 (interacts with) ARG1	0	9606.ENSP00000011653	9606.ENSP00000349446	0	FALSE	interacts with	CD4 (interacts with) ARG1
0.717	0.177	0.77	0	0.091	0	0	interacts with	CD4 (interacts with) CX3CR1	0	9606.ENSP00000011653	9606.ENSP00000351059	0	FALSE	interacts with	CD4 (interacts with) CX3CR1
0.771	0	0.772	0	0.046	0	0	interacts with	CD4 (interacts with) CASP3	0	9606.ENSP00000011653	9606.ENSP00000311032	0	FALSE	interacts with	CD4 (interacts with) CASP3
0.79	0	0.79	0	0	0	0	interacts with	CD4 (interacts with) CRP	0	9606.ENSP00000011653	9606.ENSP00000255030	0	FALSE	interacts with	CD4 (interacts with) CRP
0.773	0.114	0.79	0	0	0	0	interacts with	CD4 (interacts with) CXCL9	0	9606.ENSP00000011653	9606.ENSP00000354901	0	FALSE	interacts with	CD4 (interacts with) CXCL9
0.772	0.186	0.806	0	0	0	0	interacts with	CD4 (interacts with) CD163	0	9606.ENSP00000011653	9606.ENSP00000352071	0	FALSE	interacts with	CD4 (interacts with) CD163
0.779	0.141	0.814	0	0.097	0	0	interacts with	CD4 (interacts with) TLR2	0	9606.ENSP00000011653	9606.ENSP00000260010	0	FALSE	interacts with	CD4 (interacts with) TLR2
0.802	0.06	0.825	0	0.134	0	0	interacts with	CD4 (interacts with) CXCL12	0	9606.ENSP00000011653	9606.ENSP00000379140	0	FALSE	interacts with	CD4 (interacts with) CXCL12
0.811	0.042	0.829	0	0.128	0	0	interacts with	CD4 (interacts with) INS	0	9606.ENSP00000011653	9606.ENSP00000380432	0	FALSE	interacts with	CD4 (interacts with) INS
0.816	0.068	0.837	0	0.125	0	0	interacts with	CD4 (interacts with) BCL2	0	9606.ENSP00000011653	9606.ENSP00000381185	0	FALSE	interacts with	CD4 (interacts with) BCL2
0.832	0.042	0.839	0	0.081	0	0	interacts with	CD4 (interacts with) AKT1	0	9606.ENSP00000011653	9606.ENSP00000451828	0	FALSE	interacts with	CD4 (interacts with) AKT1
0.825	0.058	0.839	0	0.099	0	0	interacts with	CD4 (interacts with) CCL2	0	9606.ENSP00000011653	9606.ENSP00000225831	0	FALSE	interacts with	CD4 (interacts with) CCL2
0.83	0.09	0.839	0	0	0	0	interacts with	CD4 (interacts with) CXCL10	0	9606.ENSP00000011653	9606.ENSP00000305651	0	FALSE	interacts with	CD4 (interacts with) CXCL10
0.849	0.042	0.849	0	0	0	0	interacts with	CD4 (interacts with) IL18	0	9606.ENSP00000011653	9606.ENSP00000280357	0	FALSE	interacts with	CD4 (interacts with) IL18
0.848	0.058	0.858	0	0.093	0	0	interacts with	CD4 (interacts with) NFKB1	0	9606.ENSP00000011653	9606.ENSP00000226574	0	FALSE	interacts with	CD4 (interacts with) NFKB1
0.86	0.047	0.861	0	0	0	0	interacts with	CD4 (interacts with) CXCL8	0	9606.ENSP00000011653	9606.ENSP00000306512	0	FALSE	interacts with	CD4 (interacts with) CXCL8
0.865	0.063	0.868	0	0	0	0	interacts with	CD4 (interacts with) FASLG	0	9606.ENSP00000011653	9606.ENSP00000356694	0	FALSE	interacts with	CD4 (interacts with) FASLG
0.866	0.072	0.87	0	0	0	0	interacts with	CD4 (interacts with) TGFB1	0	9606.ENSP00000011653	9606.ENSP00000221930	0	FALSE	interacts with	CD4 (interacts with) TGFB1
0.873	0.065	0.876	0	0	0	0	interacts with	CD4 (interacts with) IL1A	0	9606.ENSP00000011653	9606.ENSP00000263339	0	FALSE	interacts with	CD4 (interacts with) IL1A
0.88	0	0.88	0	0	0	0	interacts with	CD4 (interacts with) CSF2	0	9606.ENSP00000011653	9606.ENSP00000296871	0	FALSE	interacts with	CD4 (interacts with) CSF2
0.855	0.156	0.88	0	0.099	0	0	interacts with	CD4 (interacts with) CCL3	0	9606.ENSP00000011653	9606.ENSP00000477908	0	FALSE	interacts with	CD4 (interacts with) CCL3
0.871	0.102	0.887	0	0.099	0	0	interacts with	CD4 (interacts with) CCL5	0	9606.ENSP00000011653	9606.ENSP00000474412	0	FALSE	interacts with	CD4 (interacts with) CCL5
0.887	0	0.887	0	0	0	0	interacts with	CD4 (interacts with) IFNA1	0	9606.ENSP00000011653	9606.ENSP00000276927	0	FALSE	interacts with	CD4 (interacts with) IFNA1
0.882	0.073	0.892	0	0.091	0	0	interacts with	CD4 (interacts with) STAT3	0	9606.ENSP00000011653	9606.ENSP00000264657	0	FALSE	interacts with	CD4 (interacts with) STAT3
0.888	0.127	0.898	0	0	0	0	interacts with	CD4 (interacts with) CD68	0	9606.ENSP00000011653	9606.ENSP00000250092	0	FALSE	interacts with	CD4 (interacts with) CD68
0.886	0.128	0.902	0	0.097	0	0	interacts with	CD4 (interacts with) TLR4	0	9606.ENSP00000011653	9606.ENSP00000363089	0	FALSE	interacts with	CD4 (interacts with) TLR4
0.888	0.184	0.909	0	0.091	0	0	interacts with	CD4 (interacts with) CCR2	0	9606.ENSP00000011653	9606.ENSP00000292301	0	FALSE	interacts with	CD4 (interacts with) CCR2
0.912	0	0.916	0	0.092	0	0	interacts with	CD4 (interacts with) FN1	0	9606.ENSP00000011653	9606.ENSP00000346839	0	FALSE	interacts with	CD4 (interacts with) FN1
0.93	0	0.93	0	0	0	0	interacts with	CD4 (interacts with) IL5	0	9606.ENSP00000011653	9606.ENSP00000231454	0	FALSE	interacts with	CD4 (interacts with) IL5
0.931	0	0.931	0	0	0	0	interacts with	CD4 (interacts with) IL13	0	9606.ENSP00000011653	9606.ENSP00000304915	0	FALSE	interacts with	CD4 (interacts with) IL13
0.929	0.136	0.939	0	0.099	0	0	interacts with	CD4 (interacts with) CCL4	0	9606.ENSP00000011653	9606.ENSP00000482259	0	FALSE	interacts with	CD4 (interacts with) CCL4
0.929	0.218	0.943	0	0.067	0	0	interacts with	CD4 (interacts with) ITGAM	0	9606.ENSP00000011653	9606.ENSP00000496959	0	FALSE	interacts with	CD4 (interacts with) ITGAM
0.941	0.162	0.949	0	0.067	0	0	interacts with	CD4 (interacts with) ITGAX	0	9606.ENSP00000011653	9606.ENSP00000454623	0	FALSE	interacts with	CD4 (interacts with) ITGAX
0.944	0.108	0.958	0	0	0	0	interacts with	CD4 (interacts with) IL1B	0	9606.ENSP00000011653	9606.ENSP00000263341	0.238	FALSE	interacts with	CD4 (interacts with) IL1B
0.966	0	0.966	0	0	0	0	interacts with	CD4 (interacts with) IL6	0	9606.ENSP00000011653	9606.ENSP00000385675	0	FALSE	interacts with	CD4 (interacts with) IL6
0.966	0.092	0.968	0	0	0	0	interacts with	CD4 (interacts with) TNF	0	9606.ENSP00000011653	9606.ENSP00000398698	0	FALSE	interacts with	CD4 (interacts with) TNF
0.968	0.062	0.969	0	0	0	0	interacts with	CD4 (interacts with) ICAM1	0	9606.ENSP00000011653	9606.ENSP00000264832	0	FALSE	interacts with	CD4 (interacts with) ICAM1
0.97	0	0.97	0	0	0	0	interacts with	CD4 (interacts with) IL4	0	9606.ENSP00000011653	9606.ENSP00000231449	0	FALSE	interacts with	CD4 (interacts with) IL4
0.972	0	0.972	0	0	0	0	interacts with	CD4 (interacts with) IL17A	0	9606.ENSP00000011653	9606.ENSP00000497968	0	FALSE	interacts with	CD4 (interacts with) IL17A
0.975	0.052	0.975	0	0	0	0	interacts with	CD4 (interacts with) IL2	0	9606.ENSP00000011653	9606.ENSP00000226730	0	FALSE	interacts with	CD4 (interacts with) IL2
0.974	0.094	0.976	0	0	0	0	interacts with	CD4 (interacts with) IL10	0	9606.ENSP00000011653	9606.ENSP00000412237	0	FALSE	interacts with	CD4 (interacts with) IL10
0.979	0.072	0.979	0	0.047	0	0	interacts with	CD4 (interacts with) FOXP3	0	9606.ENSP00000011653	9606.ENSP00000365380	0	FALSE	interacts with	CD4 (interacts with) FOXP3
0.943	0.276	0.981	0.4	0.341	0	0	interacts with	CD4 (interacts with) PTPRC	0	9606.ENSP00000011653	9606.ENSP00000411355	0	FALSE	interacts with	CD4 (interacts with) PTPRC
0.991	0.094	0.991	0	0	0	0	interacts with	CD4 (interacts with) IFNG	0	9606.ENSP00000011653	9606.ENSP00000229135	0	FALSE	interacts with	CD4 (interacts with) IFNG
0.993	0.13	0.999	0.9	0.098	0	0	interacts with	CD4 (interacts with) CD8A	0	9606.ENSP00000011653	9606.ENSP00000386559	0	FALSE	interacts with	CD4 (interacts with) CD8A
0.888	0.127	0.898	0	0	0	0	interacts with	CD68 (interacts with) CD4	0	9606.ENSP00000250092	9606.ENSP00000011653	0	FALSE	interacts with	CD68 (interacts with) CD4
0.756	0.163	0.787	0	0	0	0	interacts with	CD68 (interacts with) TGFB1	0	9606.ENSP00000250092	9606.ENSP00000221930	0	FALSE	interacts with	CD68 (interacts with) TGFB1
0.798	0.122	0.815	0	0	0	0	interacts with	CD68 (interacts with) CCL2	0	9606.ENSP00000250092	9606.ENSP00000225831	0	FALSE	interacts with	CD68 (interacts with) CCL2
0.811	0.042	0.811	0	0	0	0	interacts with	CD68 (interacts with) IFNG	0	9606.ENSP00000250092	9606.ENSP00000229135	0	FALSE	interacts with	CD68 (interacts with) IFNG
0.724	0	0.724	0	0	0	0	interacts with	CD68 (interacts with) IL4	0	9606.ENSP00000250092	9606.ENSP00000231449	0	FALSE	interacts with	CD68 (interacts with) IL4
0.695	0.13	0.723	0	0	0	0	interacts with	CD68 (interacts with) CSF1	0	9606.ENSP00000250092	9606.ENSP00000327513	0	FALSE	interacts with	CD68 (interacts with) CSF1
0.688	0.157	0.726	0	0	0	0	interacts with	CD68 (interacts with) TLR4	0	9606.ENSP00000250092	9606.ENSP00000363089	0	FALSE	interacts with	CD68 (interacts with) TLR4
0.719	0.084	0.732	0	0	0	0	interacts with	CD68 (interacts with) CXCL10	0	9606.ENSP00000250092	9606.ENSP00000305651	0	FALSE	interacts with	CD68 (interacts with) CXCL10
0.742	0	0.742	0	0	0	0	interacts with	CD68 (interacts with) ARG1	0	9606.ENSP00000250092	9606.ENSP00000349446	0	FALSE	interacts with	CD68 (interacts with) ARG1
0.741	0.076	0.75	0	0	0	0	interacts with	CD68 (interacts with) CX3CR1	0	9606.ENSP00000250092	9606.ENSP00000351059	0	FALSE	interacts with	CD68 (interacts with) CX3CR1
0.749	0.109	0.766	0	0	0	0	interacts with	CD68 (interacts with) MMP9	0	9606.ENSP00000250092	9606.ENSP00000361405	0	FALSE	interacts with	CD68 (interacts with) MMP9
0.771	0.11	0.788	0	0	0	0	interacts with	CD68 (interacts with) CCR2	0	9606.ENSP00000250092	9606.ENSP00000292301	0	FALSE	interacts with	CD68 (interacts with) CCR2
0.79	0.058	0.794	0	0	0	0	interacts with	CD68 (interacts with) IL10	0	9606.ENSP00000250092	9606.ENSP00000412237	0	FALSE	interacts with	CD68 (interacts with) IL10
0.771	0.27	0.826	0	0	0	0	interacts with	CD68 (interacts with) ITGAX	0	9606.ENSP00000250092	9606.ENSP00000454623	0	FALSE	interacts with	CD68 (interacts with) ITGAX
0.826	0.112	0.839	0	0	0	0	interacts with	CD68 (interacts with) IL6	0	9606.ENSP00000250092	9606.ENSP00000385675	0	FALSE	interacts with	CD68 (interacts with) IL6
0.816	0.168	0.84	0	0	0	0	interacts with	CD68 (interacts with) IL1B	0	9606.ENSP00000250092	9606.ENSP00000263341	0	FALSE	interacts with	CD68 (interacts with) IL1B
0.85	0	0.85	0	0	0	0	interacts with	CD68 (interacts with) FOXP3	0	9606.ENSP00000250092	9606.ENSP00000365380	0	FALSE	interacts with	CD68 (interacts with) FOXP3
0.844	0.143	0.86	0	0	0	0	interacts with	CD68 (interacts with) TNF	0	9606.ENSP00000250092	9606.ENSP00000398698	0	FALSE	interacts with	CD68 (interacts with) TNF
0.859	0.074	0.863	0	0	0	0	interacts with	CD68 (interacts with) GAPDH	0	9606.ENSP00000250092	9606.ENSP00000380070	0	FALSE	interacts with	CD68 (interacts with) GAPDH
0.87	0.095	0.877	0	0	0	0	interacts with	CD68 (interacts with) MRC1	0	9606.ENSP00000250092	9606.ENSP00000455897	0	FALSE	interacts with	CD68 (interacts with) MRC1
0.871	0.169	0.888	0	0	0	0	interacts with	CD68 (interacts with) PTPRC	0	9606.ENSP00000250092	9606.ENSP00000411355	0	FALSE	interacts with	CD68 (interacts with) PTPRC
0.888	0.089	0.893	0	0	0	0	interacts with	CD68 (interacts with) CD8A	0	9606.ENSP00000250092	9606.ENSP00000386559	0	FALSE	interacts with	CD68 (interacts with) CD8A
0.872	0.222	0.896	0	0	0	0	interacts with	CD68 (interacts with) ITGAM	0	9606.ENSP00000250092	9606.ENSP00000496959	0	FALSE	interacts with	CD68 (interacts with) ITGAM
0.902	0.203	0.919	0	0	0	0	interacts with	CD68 (interacts with) CD163	0	9606.ENSP00000250092	9606.ENSP00000352071	0	FALSE	interacts with	CD68 (interacts with) CD163
0.993	0.13	0.999	0.9	0.098	0	0	interacts with	CD8A (interacts with) CD4	0	9606.ENSP00000386559	9606.ENSP00000011653	0	FALSE	interacts with	CD8A (interacts with) CD4
0.724	0.106	0.742	0	0	0	0	interacts with	CD8A (interacts with) CCL17	0	9606.ENSP00000386559	9606.ENSP00000219244	0	FALSE	interacts with	CD8A (interacts with) CCL17
0.796	0.042	0.796	0	0	0	0	interacts with	CD8A (interacts with) TGFB1	0	9606.ENSP00000386559	9606.ENSP00000221930	0	FALSE	interacts with	CD8A (interacts with) TGFB1
0.72	0	0.72	0	0	0	0	interacts with	CD8A (interacts with) CSF3	0	9606.ENSP00000386559	9606.ENSP00000225474	0	FALSE	interacts with	CD8A (interacts with) CSF3
0.791	0.086	0.8	0	0	0	0	interacts with	CD8A (interacts with) CCL2	0	9606.ENSP00000386559	9606.ENSP00000225831	0	FALSE	interacts with	CD8A (interacts with) CCL2
0.802	0.118	0.818	0	0	0	0	interacts with	CD8A (interacts with) NFKB1	0	9606.ENSP00000386559	9606.ENSP00000226574	0	FALSE	interacts with	CD8A (interacts with) NFKB1
0.971	0.056	0.971	0	0	0	0	interacts with	CD8A (interacts with) IL2	0	9606.ENSP00000386559	9606.ENSP00000226730	0	FALSE	interacts with	CD8A (interacts with) IL2
0.987	0.322	0.99	0	0	0	0	interacts with	CD8A (interacts with) IFNG	0	9606.ENSP00000386559	9606.ENSP00000229135	0	FALSE	interacts with	CD8A (interacts with) IFNG
0.947	0.042	0.947	0	0	0	0	interacts with	CD8A (interacts with) IL4	0	9606.ENSP00000386559	9606.ENSP00000231449	0	FALSE	interacts with	CD8A (interacts with) IL4
0.865	0	0.865	0	0	0	0	interacts with	CD8A (interacts with) IL5	0	9606.ENSP00000386559	9606.ENSP00000231454	0	FALSE	interacts with	CD8A (interacts with) IL5
0.888	0.089	0.893	0	0	0	0	interacts with	CD8A (interacts with) CD68	0	9606.ENSP00000386559	9606.ENSP00000250092	0	FALSE	interacts with	CD8A (interacts with) CD68
0.766	0	0.766	0	0	0	0	interacts with	CD8A (interacts with) CRP	0	9606.ENSP00000386559	9606.ENSP00000255030	0	FALSE	interacts with	CD8A (interacts with) CRP
0.72	0.139	0.748	0	0	0	0	interacts with	CD8A (interacts with) TLR2	0	9606.ENSP00000386559	9606.ENSP00000260010	0	FALSE	interacts with	CD8A (interacts with) TLR2
0.713	0.043	0.713	0	0	0	0	interacts with	CD8A (interacts with) CDH1	0	9606.ENSP00000386559	9606.ENSP00000261769	0	FALSE	interacts with	CD8A (interacts with) CDH1
0.777	0	0.777	0	0	0	0	interacts with	CD8A (interacts with) IL1A	0	9606.ENSP00000386559	9606.ENSP00000263339	0	FALSE	interacts with	CD8A (interacts with) IL1A
0.92	0.06	0.922	0	0	0	0	interacts with	CD8A (interacts with) IL1B	0	9606.ENSP00000386559	9606.ENSP00000263341	0	FALSE	interacts with	CD8A (interacts with) IL1B
0.838	0.048	0.839	0	0	0	0	interacts with	CD8A (interacts with) STAT3	0	9606.ENSP00000386559	9606.ENSP00000264657	0	FALSE	interacts with	CD8A (interacts with) STAT3
0.842	0.044	0.842	0	0	0	0	interacts with	CD8A (interacts with) ICAM1	0	9606.ENSP00000386559	9606.ENSP00000264832	0	FALSE	interacts with	CD8A (interacts with) ICAM1
0.72	0.099	0.77	0	0.165	0	0	interacts with	CD8A (interacts with) TP53	0	9606.ENSP00000386559	9606.ENSP00000269305	0	FALSE	interacts with	CD8A (interacts with) TP53
0.89	0	0.89	0	0	0	0	interacts with	CD8A (interacts with) IFNA1	0	9606.ENSP00000386559	9606.ENSP00000276927	0	FALSE	interacts with	CD8A (interacts with) IFNA1
0.775	0.107	0.791	0	0	0	0	interacts with	CD8A (interacts with) IL18	0	9606.ENSP00000386559	9606.ENSP00000280357	0	FALSE	interacts with	CD8A (interacts with) IL18
0.819	0.155	0.84	0	0	0	0	interacts with	CD8A (interacts with) CCR2	0	9606.ENSP00000386559	9606.ENSP00000292301	0	FALSE	interacts with	CD8A (interacts with) CCR2
0.873	0	0.873	0	0	0	0	interacts with	CD8A (interacts with) CSF2	0	9606.ENSP00000386559	9606.ENSP00000296871	0	FALSE	interacts with	CD8A (interacts with) CSF2
0.854	0	0.854	0	0	0	0	interacts with	CD8A (interacts with) IL13	0	9606.ENSP00000386559	9606.ENSP00000304915	0	FALSE	interacts with	CD8A (interacts with) IL13
0.871	0.162	0.887	0	0	0	0	interacts with	CD8A (interacts with) CXCL10	0	9606.ENSP00000386559	9606.ENSP00000305651	0	FALSE	interacts with	CD8A (interacts with) CXCL10
0.844	0.043	0.844	0	0	0	0	interacts with	CD8A (interacts with) CXCL8	0	9606.ENSP00000386559	9606.ENSP00000306512	0	FALSE	interacts with	CD8A (interacts with) CXCL8
0.753	0	0.753	0	0	0	0	interacts with	CD8A (interacts with) FN1	0	9606.ENSP00000386559	9606.ENSP00000346839	0	FALSE	interacts with	CD8A (interacts with) FN1
0.72	0	0.72	0	0	0	0	interacts with	CD8A (interacts with) ARG1	0	9606.ENSP00000386559	9606.ENSP00000349446	0	FALSE	interacts with	CD8A (interacts with) ARG1
0.67	0.138	0.703	0	0	0	0	interacts with	CD8A (interacts with) CX3CR1	0	9606.ENSP00000386559	9606.ENSP00000351059	0	FALSE	interacts with	CD8A (interacts with) CX3CR1
0.768	0.143	0.797	0	0.064	0	0	interacts with	CD8A (interacts with) CD163	0	9606.ENSP00000386559	9606.ENSP00000352071	0	FALSE	interacts with	CD8A (interacts with) CD163
0.79	0.307	0.848	0	0	0	0	interacts with	CD8A (interacts with) CXCL9	0	9606.ENSP00000386559	9606.ENSP00000354901	0	FALSE	interacts with	CD8A (interacts with) CXCL9
0.879	0.382	0.922	0	0	0	0	interacts with	CD8A (interacts with) FASLG	0	9606.ENSP00000386559	9606.ENSP00000356694	0	FALSE	interacts with	CD8A (interacts with) FASLG
0.839	0.093	0.847	0	0	0	0	interacts with	CD8A (interacts with) TLR4	0	9606.ENSP00000386559	9606.ENSP00000363089	0	FALSE	interacts with	CD8A (interacts with) TLR4
0.946	0.094	0.948	0	0	0	0	interacts with	CD8A (interacts with) FOXP3	0	9606.ENSP00000386559	9606.ENSP00000365380	0	FALSE	interacts with	CD8A (interacts with) FOXP3
0.697	0.056	0.701	0	0	0	0	interacts with	CD8A (interacts with) CXCL12	0	9606.ENSP00000386559	9606.ENSP00000379140	0	FALSE	interacts with	CD8A (interacts with) CXCL12
0.827	0.066	0.831	0	0	0	0	interacts with	CD8A (interacts with) BCL2	0	9606.ENSP00000386559	9606.ENSP00000381185	0	FALSE	interacts with	CD8A (interacts with) BCL2
0.93	0.042	0.93	0	0	0	0	interacts with	CD8A (interacts with) IL6	0	9606.ENSP00000386559	9606.ENSP00000385675	0	FALSE	interacts with	CD8A (interacts with) IL6
0.715	0.075	0.725	0	0	0	0	interacts with	CD8A (interacts with) MRC1	0	9606.ENSP00000386559	9606.ENSP00000455897	0	FALSE	interacts with	CD8A (interacts with) MRC1
0.737	0	0.737	0	0	0	0	interacts with	CD8A (interacts with) CTNNB1	0	9606.ENSP00000386559	9606.ENSP00000495360	0	FALSE	interacts with	CD8A (interacts with) CTNNB1
0.811	0	0.811	0	0.045	0	0	interacts with	CD8A (interacts with) AKT1	0	9606.ENSP00000386559	9606.ENSP00000451828	0	FALSE	interacts with	CD8A (interacts with) AKT1
0.863	0.111	0.873	0	0	0	0	interacts with	CD8A (interacts with) CCL3	0	9606.ENSP00000386559	9606.ENSP00000477908	0	FALSE	interacts with	CD8A (interacts with) CCL3
0.861	0.24	0.889	0	0	0	0	interacts with	CD8A (interacts with) CCL4	0	9606.ENSP00000386559	9606.ENSP00000482259	0	FALSE	interacts with	CD8A (interacts with) CCL4
0.936	0	0.936	0	0	0	0	interacts with	CD8A (interacts with) IL17A	0	9606.ENSP00000386559	9606.ENSP00000497968	0	FALSE	interacts with	CD8A (interacts with) IL17A
0.932	0.136	0.938	0	0	0	0	interacts with	CD8A (interacts with) ITGAX	0	9606.ENSP00000386559	9606.ENSP00000454623	0	FALSE	interacts with	CD8A (interacts with) ITGAX
0.932	0.154	0.94	0	0	0	0	interacts with	CD8A (interacts with) ITGAM	0	9606.ENSP00000386559	9606.ENSP00000496959	0	FALSE	interacts with	CD8A (interacts with) ITGAM
0.955	0.105	0.958	0	0	0	0	interacts with	CD8A (interacts with) IL10	0	9606.ENSP00000386559	9606.ENSP00000412237	0	FALSE	interacts with	CD8A (interacts with) IL10
0.957	0.073	0.958	0	0	0	0	interacts with	CD8A (interacts with) TNF	0	9606.ENSP00000386559	9606.ENSP00000398698	0	FALSE	interacts with	CD8A (interacts with) TNF
0.874	0.692	0.959	0	0	0	0	interacts with	CD8A (interacts with) CCL5	0	9606.ENSP00000386559	9606.ENSP00000474412	0	FALSE	interacts with	CD8A (interacts with) CCL5
0.945	0.246	0.969	0	0.322	0	0	interacts with	CD8A (interacts with) PTPRC	0	9606.ENSP00000386559	9606.ENSP00000411355	0	FALSE	interacts with	CD8A (interacts with) PTPRC
0.79	0	0.791	0	0.048	0	0	interacts with	CDH1 (interacts with) MMP2	0	9606.ENSP00000261769	9606.ENSP00000219070	0	FALSE	interacts with	CDH1 (interacts with) MMP2
0.822	0.051	0.841	0	0.133	0	0	interacts with	CDH1 (interacts with) TGFB1	0	9606.ENSP00000261769	9606.ENSP00000221930	0	FALSE	interacts with	CDH1 (interacts with) TGFB1
0.704	0.059	0.819	0.4	0.048	0	0	interacts with	CDH1 (interacts with) MMP7	0	9606.ENSP00000261769	9606.ENSP00000260227	0	FALSE	interacts with	CDH1 (interacts with) MMP7
0.713	0.043	0.713	0	0	0	0	interacts with	CDH1 (interacts with) CD8A	0	9606.ENSP00000261769	9606.ENSP00000386559	0	FALSE	interacts with	CDH1 (interacts with) CD8A
0.721	0	0.721	0	0	0	0	interacts with	CDH1 (interacts with) HIF1A	0	9606.ENSP00000261769	9606.ENSP00000437955	0	FALSE	interacts with	CDH1 (interacts with) HIF1A
0.723	0	0.724	0	0.045	0	0	interacts with	CDH1 (interacts with) SMAD3	0	9606.ENSP00000261769	9606.ENSP00000332973	0	FALSE	interacts with	CDH1 (interacts with) SMAD3
0.722	0.054	0.726	0	0	0	0	interacts with	CDH1 (interacts with) CXCL12	0	9606.ENSP00000261769	9606.ENSP00000379140	0	FALSE	interacts with	CDH1 (interacts with) CXCL12
0.731	0	0.731	0	0	0	0	interacts with	CDH1 (interacts with) IGF1	0	9606.ENSP00000261769	9606.ENSP00000376637	0	FALSE	interacts with	CDH1 (interacts with) IGF1
0.728	0.056	0.732	0	0	0	0	interacts with	CDH1 (interacts with) STAT3	0	9606.ENSP00000261769	9606.ENSP00000264657	0	FALSE	interacts with	CDH1 (interacts with) STAT3
0.736	0	0.736	0	0	0	0	interacts with	CDH1 (interacts with) BCL2	0	9606.ENSP00000261769	9606.ENSP00000381185	0	FALSE	interacts with	CDH1 (interacts with) BCL2
0.851	0	0.852	0	0.045	0	0	interacts with	CDH1 (interacts with) SMAD2	0	9606.ENSP00000261769	9606.ENSP00000262160	0	FALSE	interacts with	CDH1 (interacts with) SMAD2
0.852	0.049	0.853	0	0	0	0	interacts with	CDH1 (interacts with) TP53	0	9606.ENSP00000261769	9606.ENSP00000269305	0	FALSE	interacts with	CDH1 (interacts with) TP53
0.851	0	0.855	0	0.071	0	0	interacts with	CDH1 (interacts with) GAPDH	0	9606.ENSP00000261769	9606.ENSP00000380070	0	FALSE	interacts with	CDH1 (interacts with) GAPDH
0.873	0	0.873	0	0.048	0	0	interacts with	CDH1 (interacts with) FN1	0	9606.ENSP00000261769	9606.ENSP00000346839	0	FALSE	interacts with	CDH1 (interacts with) FN1
0.892	0	0.892	0	0	0	0	interacts with	CDH1 (interacts with) VIM	0	9606.ENSP00000261769	9606.ENSP00000446007	0	FALSE	interacts with	CDH1 (interacts with) VIM
0.889	0	0.903	0	0.165	0	0	interacts with	CDH1 (interacts with) AKT1	0	9606.ENSP00000261769	9606.ENSP00000451828	0	FALSE	interacts with	CDH1 (interacts with) AKT1
0.731	0.062	0.956	0.75	0.387	0	0	interacts with	CDH1 (interacts with) CASP3	0	9606.ENSP00000261769	9606.ENSP00000311032	0	FALSE	interacts with	CDH1 (interacts with) CASP3
0.836	0.044	0.957	0.75	0.048	0	0	interacts with	CDH1 (interacts with) MMP9	0	9606.ENSP00000261769	9606.ENSP00000361405	0	FALSE	interacts with	CDH1 (interacts with) MMP9
0.999	0.063	0.999	0.9	0.999	0	0	interacts with	CDH1 (interacts with) CTNNB1	0	9606.ENSP00000261769	9606.ENSP00000495360	0	FALSE	interacts with	CDH1 (interacts with) CTNNB1
0.995	0.055	0.999	0	0.815	0	0	interacts with	CDH1 (interacts with) EGFR	0	9606.ENSP00000261769	9606.ENSP00000275493	0	FALSE	interacts with	CDH1 (interacts with) EGFR
0.687	0.115	0.96	0.75	0.503	0	0	interacts with	COL18A1 (interacts with) MMP2	0	9606.ENSP00000352798	9606.ENSP00000219070	0	FALSE	interacts with	COL18A1 (interacts with) MMP2
0.273	0.149	0.724	0.4	0.292	0	0.615	interacts with	COL18A1 (interacts with) COL1A1	0	9606.ENSP00000352798	9606.ENSP00000225964	0.111	FALSE	interacts with	COL18A1 (interacts with) COL1A1
0.815	0.163	0.838	0	0	0	0	interacts with	COL18A1 (interacts with) FN1	0	9606.ENSP00000352798	9606.ENSP00000346839	0	FALSE	interacts with	COL18A1 (interacts with) FN1
0.588	0.11	0.92	0.75	0.238	0	0	interacts with	COL18A1 (interacts with) MMP9	0	9606.ENSP00000352798	9606.ENSP00000361405	0	FALSE	interacts with	COL18A1 (interacts with) MMP9
0.817	0.175	0.842	0	0	0	0	interacts with	COL1A1 (interacts with) TIMP1	0	9606.ENSP00000225964	9606.ENSP00000218388	0	FALSE	interacts with	COL1A1 (interacts with) TIMP1
0.623	0.403	0.828	0	0.298	0	0	interacts with	COL1A1 (interacts with) MMP2	0	9606.ENSP00000225964	9606.ENSP00000219070	0	FALSE	interacts with	COL1A1 (interacts with) MMP2
0.789	0.047	0.802	0	0.095	0	0	interacts with	COL1A1 (interacts with) TGFB1	0	9606.ENSP00000225964	9606.ENSP00000221930	0	FALSE	interacts with	COL1A1 (interacts with) TGFB1
0.697	0.097	0.714	0	0	0	0	interacts with	COL1A1 (interacts with) IGF1	0	9606.ENSP00000225964	9606.ENSP00000376637	0	FALSE	interacts with	COL1A1 (interacts with) IGF1
0.273	0.149	0.724	0.4	0.292	0	0.615	interacts with	COL1A1 (interacts with) COL18A1	0	9606.ENSP00000225964	9606.ENSP00000352798	0.111	FALSE	interacts with	COL1A1 (interacts with) COL18A1
0.739	0.043	0.74	0	0	0	0	interacts with	COL1A1 (interacts with) GAPDH	0	9606.ENSP00000225964	9606.ENSP00000380070	0	FALSE	interacts with	COL1A1 (interacts with) GAPDH
0.742	0.061	0.747	0	0	0	0	interacts with	COL1A1 (interacts with) SPP1	0	9606.ENSP00000225964	9606.ENSP00000378517	0	FALSE	interacts with	COL1A1 (interacts with) SPP1
0.738	0.139	0.767	0	0.05	0	0	interacts with	COL1A1 (interacts with) MMP1	0	9606.ENSP00000225964	9606.ENSP00000322788	0	FALSE	interacts with	COL1A1 (interacts with) MMP1
0.751	0	0.773	0	0.126	0	0	interacts with	COL1A1 (interacts with) SMAD3	0	9606.ENSP00000225964	9606.ENSP00000332973	0	FALSE	interacts with	COL1A1 (interacts with) SMAD3
0.749	0.144	0.778	0	0.05	0	0	interacts with	COL1A1 (interacts with) VIM	0	9606.ENSP00000225964	9606.ENSP00000446007	0	FALSE	interacts with	COL1A1 (interacts with) VIM
0.83	0.089	0.84	0	0.05	0	0	interacts with	COL1A1 (interacts with) MMP9	0	9606.ENSP00000225964	9606.ENSP00000361405	0	FALSE	interacts with	COL1A1 (interacts with) MMP9
0.848	0.214	0.876	0	0	0	0	interacts with	COL1A1 (interacts with) CCN2	0	9606.ENSP00000225964	9606.ENSP00000356954	0	FALSE	interacts with	COL1A1 (interacts with) CCN2
0.912	0.335	0.974	0	0.594	0	0	interacts with	COL1A1 (interacts with) FN1	0	9606.ENSP00000225964	9606.ENSP00000346839	0	FALSE	interacts with	COL1A1 (interacts with) FN1
0.79	0	0.79	0	0	0	0	interacts with	CRP (interacts with) CD4	0	9606.ENSP00000255030	9606.ENSP00000011653	0	FALSE	interacts with	CRP (interacts with) CD4
0.79	0.056	0.793	0	0	0	0	interacts with	CRP (interacts with) SERPINE1	0	9606.ENSP00000255030	9606.ENSP00000223095	0	FALSE	interacts with	CRP (interacts with) SERPINE1
0.696	0.093	0.712	0	0	0	0	interacts with	CRP (interacts with) CSF3	0	9606.ENSP00000255030	9606.ENSP00000225474	0	FALSE	interacts with	CRP (interacts with) CSF3
0.816	0.044	0.816	0	0	0	0	interacts with	CRP (interacts with) CCL2	0	9606.ENSP00000255030	9606.ENSP00000225831	0	FALSE	interacts with	CRP (interacts with) CCL2
0.764	0.1	0.778	0	0	0	0	interacts with	CRP (interacts with) IL2	0	9606.ENSP00000255030	9606.ENSP00000226730	0	FALSE	interacts with	CRP (interacts with) IL2
0.798	0.042	0.798	0	0	0	0	interacts with	CRP (interacts with) IFNG	0	9606.ENSP00000255030	9606.ENSP00000229135	0	FALSE	interacts with	CRP (interacts with) IFNG
0.814	0.085	0.822	0	0	0	0	interacts with	CRP (interacts with) IL4	0	9606.ENSP00000255030	9606.ENSP00000231449	0	FALSE	interacts with	CRP (interacts with) IL4
0.704	0.053	0.707	0	0	0	0	interacts with	CRP (interacts with) NLRP3	0	9606.ENSP00000255030	9606.ENSP00000337383	0	FALSE	interacts with	CRP (interacts with) NLRP3
0.707	0	0.707	0	0	0	0	interacts with	CRP (interacts with) CCL5	0	9606.ENSP00000255030	9606.ENSP00000474412	0	FALSE	interacts with	CRP (interacts with) CCL5
0.728	0.124	0.751	0	0	0	0	interacts with	CRP (interacts with) IL17A	0	9606.ENSP00000255030	9606.ENSP00000497968	0	FALSE	interacts with	CRP (interacts with) IL17A
0.759	0	0.759	0	0	0	0	interacts with	CRP (interacts with) CCL3	0	9606.ENSP00000255030	9606.ENSP00000477908	0	FALSE	interacts with	CRP (interacts with) CCL3
0.759	0.048	0.76	0	0	0	0	interacts with	CRP (interacts with) IGF1	0	9606.ENSP00000255030	9606.ENSP00000376637	0	FALSE	interacts with	CRP (interacts with) IGF1
0.765	0	0.765	0	0	0	0	interacts with	CRP (interacts with) CXCL10	0	9606.ENSP00000255030	9606.ENSP00000305651	0	FALSE	interacts with	CRP (interacts with) CXCL10
0.766	0	0.766	0	0	0	0	interacts with	CRP (interacts with) CD8A	0	9606.ENSP00000255030	9606.ENSP00000386559	0	FALSE	interacts with	CRP (interacts with) CD8A
0.789	0	0.789	0	0	0	0	interacts with	CRP (interacts with) ICAM1	0	9606.ENSP00000255030	9606.ENSP00000264832	0	FALSE	interacts with	CRP (interacts with) ICAM1
0.803	0.059	0.806	0	0	0	0	interacts with	CRP (interacts with) MMP9	0	9606.ENSP00000255030	9606.ENSP00000361405	0	FALSE	interacts with	CRP (interacts with) MMP9
0.811	0.099	0.822	0	0	0	0	interacts with	CRP (interacts with) IL1A	0	9606.ENSP00000255030	9606.ENSP00000263339	0	FALSE	interacts with	CRP (interacts with) IL1A
0.835	0	0.835	0	0	0	0	interacts with	CRP (interacts with) IL18	0	9606.ENSP00000255030	9606.ENSP00000280357	0	FALSE	interacts with	CRP (interacts with) IL18
0.867	0.052	0.868	0	0	0	0	interacts with	CRP (interacts with) IL1RN	0	9606.ENSP00000255030	9606.ENSP00000259206	0	FALSE	interacts with	CRP (interacts with) IL1RN
0.874	0.043	0.874	0	0	0	0	interacts with	CRP (interacts with) CXCL8	0	9606.ENSP00000255030	9606.ENSP00000306512	0	FALSE	interacts with	CRP (interacts with) CXCL8
0.872	0.086	0.878	0	0	0	0	interacts with	CRP (interacts with) IL10	0	9606.ENSP00000255030	9606.ENSP00000412237	0	FALSE	interacts with	CRP (interacts with) IL10
0.883	0.067	0.886	0	0	0	0	interacts with	CRP (interacts with) IL1B	0	9606.ENSP00000255030	9606.ENSP00000263341	0	FALSE	interacts with	CRP (interacts with) IL1B
0.887	0.082	0.891	0	0	0	0	interacts with	CRP (interacts with) INS	0	9606.ENSP00000255030	9606.ENSP00000380432	0	FALSE	interacts with	CRP (interacts with) INS
0.855	0.059	0.894	0	0.292	0	0	interacts with	CRP (interacts with) FN1	0	9606.ENSP00000255030	9606.ENSP00000346839	0	FALSE	interacts with	CRP (interacts with) FN1
0.938	0	0.938	0	0	0	0	interacts with	CRP (interacts with) TNF	0	9606.ENSP00000255030	9606.ENSP00000398698	0	FALSE	interacts with	CRP (interacts with) TNF
0.968	0.047	0.968	0	0	0	0	interacts with	CRP (interacts with) IL6	0	9606.ENSP00000255030	9606.ENSP00000385675	0	FALSE	interacts with	CRP (interacts with) IL6
0.75	0.139	0.776	0	0	0	0	interacts with	CSF1 (interacts with) TGFB1	0	9606.ENSP00000327513	9606.ENSP00000221930	0	FALSE	interacts with	CSF1 (interacts with) TGFB1
0.932	0.063	0.933	0	0	0	0	interacts with	CSF1 (interacts with) CSF3	0	9606.ENSP00000327513	9606.ENSP00000225474	0	FALSE	interacts with	CSF1 (interacts with) CSF3
0.792	0.229	0.833	0	0	0	0	interacts with	CSF1 (interacts with) CCL2	0	9606.ENSP00000327513	9606.ENSP00000225831	0	FALSE	interacts with	CSF1 (interacts with) CCL2
0.789	0.043	0.79	0	0	0	0	interacts with	CSF1 (interacts with) IFNG	0	9606.ENSP00000327513	9606.ENSP00000229135	0	FALSE	interacts with	CSF1 (interacts with) IFNG
0.79	0.042	0.791	0	0	0	0	interacts with	CSF1 (interacts with) IL4	0	9606.ENSP00000327513	9606.ENSP00000231449	0	FALSE	interacts with	CSF1 (interacts with) IL4
0.695	0.13	0.723	0	0	0	0	interacts with	CSF1 (interacts with) CD68	0	9606.ENSP00000327513	9606.ENSP00000250092	0	FALSE	interacts with	CSF1 (interacts with) CD68
0.808	0.129	0.826	0	0	0	0	interacts with	CSF1 (interacts with) IL1A	0	9606.ENSP00000327513	9606.ENSP00000263339	0	FALSE	interacts with	CSF1 (interacts with) IL1A
0.793	0.12	0.81	0	0	0	0	interacts with	CSF1 (interacts with) IL1B	0	9606.ENSP00000327513	9606.ENSP00000263341	0	FALSE	interacts with	CSF1 (interacts with) IL1B
0.607	0.075	0.802	0.5	0	0	0	interacts with	CSF1 (interacts with) STAT3	0	9606.ENSP00000327513	9606.ENSP00000264657	0	FALSE	interacts with	CSF1 (interacts with) STAT3
0.571	0.389	0.829	0.4	0	0	0	interacts with	CSF1 (interacts with) ICAM1	0	9606.ENSP00000327513	9606.ENSP00000264832	0	FALSE	interacts with	CSF1 (interacts with) ICAM1
0.834	0.072	0.941	0.65	0	0	0	interacts with	CSF1 (interacts with) EGFR	0	9606.ENSP00000327513	9606.ENSP00000275493	0	FALSE	interacts with	CSF1 (interacts with) EGFR
0.837	0	0.837	0	0	0	0	interacts with	CSF1 (interacts with) CCR2	0	9606.ENSP00000327513	9606.ENSP00000292301	0	FALSE	interacts with	CSF1 (interacts with) CCR2
0.963	0.081	0.964	0	0	0	0	interacts with	CSF1 (interacts with) CSF2	0	9606.ENSP00000327513	9606.ENSP00000296871	0	FALSE	interacts with	CSF1 (interacts with) CSF2
0.732	0.047	0.733	0	0	0	0	interacts with	CSF1 (interacts with) IL13	0	9606.ENSP00000327513	9606.ENSP00000304915	0	FALSE	interacts with	CSF1 (interacts with) IL13
0.706	0.11	0.728	0	0	0	0	interacts with	CSF1 (interacts with) CXCL10	0	9606.ENSP00000327513	9606.ENSP00000305651	0	FALSE	interacts with	CSF1 (interacts with) CXCL10
0.666	0.178	0.714	0	0	0	0	interacts with	CSF1 (interacts with) CXCL8	0	9606.ENSP00000327513	9606.ENSP00000306512	0	FALSE	interacts with	CSF1 (interacts with) CXCL8
0.68	0.103	0.701	0	0	0	0	interacts with	CSF1 (interacts with) CXCL12	0	9606.ENSP00000327513	9606.ENSP00000379140	0	FALSE	interacts with	CSF1 (interacts with) CXCL12
0.72	0.054	0.723	0	0	0	0	interacts with	CSF1 (interacts with) MRC1	0	9606.ENSP00000327513	9606.ENSP00000455897	0	FALSE	interacts with	CSF1 (interacts with) MRC1
0.697	0.139	0.728	0	0	0	0	interacts with	CSF1 (interacts with) CCL3	0	9606.ENSP00000327513	9606.ENSP00000477908	0	FALSE	interacts with	CSF1 (interacts with) CCL3
0.724	0.07	0.732	0	0	0	0	interacts with	CSF1 (interacts with) CCL5	0	9606.ENSP00000327513	9606.ENSP00000474412	0	FALSE	interacts with	CSF1 (interacts with) CCL5
0.721	0.083	0.734	0	0	0	0	interacts with	CSF1 (interacts with) CD163	0	9606.ENSP00000327513	9606.ENSP00000352071	0	FALSE	interacts with	CSF1 (interacts with) CD163
0.743	0	0.743	0	0	0	0	interacts with	CSF1 (interacts with) GAPDH	0	9606.ENSP00000327513	9606.ENSP00000380070	0	FALSE	interacts with	CSF1 (interacts with) GAPDH
0.768	0.094	0.781	0	0	0	0	interacts with	CSF1 (interacts with) ITGAM	0	9606.ENSP00000327513	9606.ENSP00000496959	0	FALSE	interacts with	CSF1 (interacts with) ITGAM
0.781	0.126	0.801	0	0	0	0	interacts with	CSF1 (interacts with) TNF	0	9606.ENSP00000327513	9606.ENSP00000398698	0	FALSE	interacts with	CSF1 (interacts with) TNF
0.805	0.146	0.827	0	0	0	0	interacts with	CSF1 (interacts with) IL6	0	9606.ENSP00000327513	9606.ENSP00000385675	0	FALSE	interacts with	CSF1 (interacts with) IL6
0.792	0.047	0.87	0.4	0	0	0	interacts with	CSF1 (interacts with) IL10	0	9606.ENSP00000327513	9606.ENSP00000412237	0	FALSE	interacts with	CSF1 (interacts with) IL10
0.88	0	0.88	0	0	0	0	interacts with	CSF2 (interacts with) CD4	0	9606.ENSP00000296871	9606.ENSP00000011653	0	FALSE	interacts with	CSF2 (interacts with) CD4
0.697	0.055	0.701	0	0	0	0	interacts with	CSF2 (interacts with) TGFB1	0	9606.ENSP00000296871	9606.ENSP00000221930	0	FALSE	interacts with	CSF2 (interacts with) TGFB1
0.998	0.4	0.999	0.4	0	0	0	interacts with	CSF2 (interacts with) CSF3	0	9606.ENSP00000296871	9606.ENSP00000225474	0	FALSE	interacts with	CSF2 (interacts with) CSF3
0.879	0.13	0.931	0.4	0	0	0	interacts with	CSF2 (interacts with) CCL2	0	9606.ENSP00000296871	9606.ENSP00000225831	0	FALSE	interacts with	CSF2 (interacts with) CCL2
0.722	0.072	0.73	0	0	0	0	interacts with	CSF2 (interacts with) NFKB1	0	9606.ENSP00000296871	9606.ENSP00000226574	0	FALSE	interacts with	CSF2 (interacts with) NFKB1
0.996	0.167	0.997	0.4	0	0	0	interacts with	CSF2 (interacts with) IL2	0	9606.ENSP00000296871	9606.ENSP00000226730	0	FALSE	interacts with	CSF2 (interacts with) IL2
0.981	0.181	0.984	0	0	0	0	interacts with	CSF2 (interacts with) IFNG	0	9606.ENSP00000296871	9606.ENSP00000229135	0	FALSE	interacts with	CSF2 (interacts with) IFNG
0.958	0.152	0.963	0	0	0	0	interacts with	CSF2 (interacts with) IL4	0	9606.ENSP00000296871	9606.ENSP00000231449	0	FALSE	interacts with	CSF2 (interacts with) IL4
0.988	0.168	0.993	0.4	0	0	0	interacts with	CSF2 (interacts with) IL5	0	9606.ENSP00000296871	9606.ENSP00000231454	0	FALSE	interacts with	CSF2 (interacts with) IL5
0.798	0.042	0.798	0	0	0	0	interacts with	CSF2 (interacts with) TLR2	0	9606.ENSP00000296871	9606.ENSP00000260010	0	FALSE	interacts with	CSF2 (interacts with) TLR2
0.992	0.523	0.997	0.4	0	0	0	interacts with	CSF2 (interacts with) IL1A	0	9606.ENSP00000296871	9606.ENSP00000263339	0	FALSE	interacts with	CSF2 (interacts with) IL1A
0.996	0.31	0.998	0.4	0	0	0	interacts with	CSF2 (interacts with) IL1B	0	9606.ENSP00000296871	9606.ENSP00000263341	0	FALSE	interacts with	CSF2 (interacts with) IL1B
0.964	0.076	0.965	0	0	0	0	interacts with	CSF2 (interacts with) FGF2	0	9606.ENSP00000296871	9606.ENSP00000264498	0	FALSE	interacts with	CSF2 (interacts with) FGF2
0.715	0	0.851	0.5	0	0	0	interacts with	CSF2 (interacts with) STAT3	0	9606.ENSP00000296871	9606.ENSP00000264657	0	FALSE	interacts with	CSF2 (interacts with) STAT3
0.722	0.11	0.742	0	0	0	0	interacts with	CSF2 (interacts with) ICAM1	0	9606.ENSP00000296871	9606.ENSP00000264832	0	FALSE	interacts with	CSF2 (interacts with) ICAM1
0.718	0	0.718	0	0	0	0	interacts with	CSF2 (interacts with) TP53	0	9606.ENSP00000296871	9606.ENSP00000269305	0	FALSE	interacts with	CSF2 (interacts with) TP53
0.569	0.042	0.842	0.65	0	0	0	interacts with	CSF2 (interacts with) EGFR	0	9606.ENSP00000296871	9606.ENSP00000275493	0	FALSE	interacts with	CSF2 (interacts with) EGFR
0.85	0.048	0.851	0	0	0	0	interacts with	CSF2 (interacts with) IFNA1	0	9606.ENSP00000296871	9606.ENSP00000276927	0	FALSE	interacts with	CSF2 (interacts with) IFNA1
0.835	0	0.897	0.4	0	0	0	interacts with	CSF2 (interacts with) IL18	0	9606.ENSP00000296871	9606.ENSP00000280357	0	FALSE	interacts with	CSF2 (interacts with) IL18
0.703	0.042	0.703	0	0	0	0	interacts with	CSF2 (interacts with) IL33	0	9606.ENSP00000296871	9606.ENSP00000370842	0	FALSE	interacts with	CSF2 (interacts with) IL33
0.728	0.071	0.736	0	0	0	0	interacts with	CSF2 (interacts with) CXCL9	0	9606.ENSP00000296871	9606.ENSP00000354901	0	FALSE	interacts with	CSF2 (interacts with) CXCL9
0.728	0.079	0.738	0	0	0	0	interacts with	CSF2 (interacts with) FASLG	0	9606.ENSP00000296871	9606.ENSP00000356694	0	FALSE	interacts with	CSF2 (interacts with) FASLG
0.739	0.054	0.743	0	0	0	0	interacts with	CSF2 (interacts with) FOXP3	0	9606.ENSP00000296871	9606.ENSP00000365380	0	FALSE	interacts with	CSF2 (interacts with) FOXP3
0.765	0	0.765	0	0	0	0	interacts with	CSF2 (interacts with) PTPRC	0	9606.ENSP00000296871	9606.ENSP00000411355	0	FALSE	interacts with	CSF2 (interacts with) PTPRC
0.781	0	0.781	0	0	0	0	interacts with	CSF2 (interacts with) TLR4	0	9606.ENSP00000296871	9606.ENSP00000363089	0	FALSE	interacts with	CSF2 (interacts with) TLR4
0.806	0.067	0.811	0	0	0	0	interacts with	CSF2 (interacts with) ITGAM	0	9606.ENSP00000296871	9606.ENSP00000496959	0	FALSE	interacts with	CSF2 (interacts with) ITGAM
0.846	0.067	0.85	0	0	0	0	interacts with	CSF2 (interacts with) ITGAX	0	9606.ENSP00000296871	9606.ENSP00000454623	0	FALSE	interacts with	CSF2 (interacts with) ITGAX
0.873	0	0.873	0	0	0	0	interacts with	CSF2 (interacts with) CD8A	0	9606.ENSP00000296871	9606.ENSP00000386559	0	FALSE	interacts with	CSF2 (interacts with) CD8A
0.881	0.101	0.888	0	0	0	0	interacts with	CSF2 (interacts with) IL17A	0	9606.ENSP00000296871	9606.ENSP00000497968	0	FALSE	interacts with	CSF2 (interacts with) IL17A
0.85	0.089	0.911	0.4	0	0	0	interacts with	CSF2 (interacts with) CXCL10	0	9606.ENSP00000296871	9606.ENSP00000305651	0	FALSE	interacts with	CSF2 (interacts with) CXCL10
0.871	0.076	0.922	0.4	0	0	0	interacts with	CSF2 (interacts with) CCL5	0	9606.ENSP00000296871	9606.ENSP00000474412	0	FALSE	interacts with	CSF2 (interacts with) CCL5
0.871	0.1	0.924	0.4	0	0	0	interacts with	CSF2 (interacts with) CCL4	0	9606.ENSP00000296871	9606.ENSP00000482259	0	FALSE	interacts with	CSF2 (interacts with) CCL4
0.921	0.204	0.934	0	0	0	0	interacts with	CSF2 (interacts with) IL13	0	9606.ENSP00000296871	9606.ENSP00000304915	0	FALSE	interacts with	CSF2 (interacts with) IL13
0.877	0.196	0.935	0.4	0	0	0	interacts with	CSF2 (interacts with) CCL3	0	9606.ENSP00000296871	9606.ENSP00000477908	0	FALSE	interacts with	CSF2 (interacts with) CCL3
0.93	0.096	0.959	0.4	0	0	0	interacts with	CSF2 (interacts with) IL10	0	9606.ENSP00000296871	9606.ENSP00000412237	0	FALSE	interacts with	CSF2 (interacts with) IL10
0.963	0.081	0.964	0	0	0	0	interacts with	CSF2 (interacts with) CSF1	0	9606.ENSP00000296871	9606.ENSP00000327513	0	FALSE	interacts with	CSF2 (interacts with) CSF1
0.929	0.369	0.97	0.4	0	0	0	interacts with	CSF2 (interacts with) TNF	0	9606.ENSP00000296871	9606.ENSP00000398698	0	FALSE	interacts with	CSF2 (interacts with) TNF
0.942	0.277	0.972	0.4	0	0	0	interacts with	CSF2 (interacts with) CXCL8	0	9606.ENSP00000296871	9606.ENSP00000306512	0	FALSE	interacts with	CSF2 (interacts with) CXCL8
0.945	0.284	0.974	0.4	0	0	0	interacts with	CSF2 (interacts with) IL6	0	9606.ENSP00000296871	9606.ENSP00000385675	0	FALSE	interacts with	CSF2 (interacts with) IL6
0.734	0	0.734	0	0	0	0	interacts with	CSF3 (interacts with) CD4	0	9606.ENSP00000225474	9606.ENSP00000011653	0	FALSE	interacts with	CSF3 (interacts with) CD4
0.693	0.093	0.709	0	0	0	0	interacts with	CSF3 (interacts with) INS	0	9606.ENSP00000225474	9606.ENSP00000380432	0	FALSE	interacts with	CSF3 (interacts with) INS
0.696	0.093	0.712	0	0	0	0	interacts with	CSF3 (interacts with) CRP	0	9606.ENSP00000225474	9606.ENSP00000255030	0	FALSE	interacts with	CSF3 (interacts with) CRP
0.72	0	0.72	0	0	0	0	interacts with	CSF3 (interacts with) CD8A	0	9606.ENSP00000225474	9606.ENSP00000386559	0	FALSE	interacts with	CSF3 (interacts with) CD8A
0.757	0	0.757	0	0	0	0	interacts with	CSF3 (interacts with) TLR4	0	9606.ENSP00000225474	9606.ENSP00000363089	0	FALSE	interacts with	CSF3 (interacts with) TLR4
0.719	0.086	0.776	0	0	0	0	interacts with	CSF3 (interacts with) ICAM1	0	9606.ENSP00000225474	9606.ENSP00000264832	0.201	FALSE	interacts with	CSF3 (interacts with) ICAM1
0.786	0	0.786	0	0	0	0	interacts with	CSF3 (interacts with) CXCL12	0	9606.ENSP00000225474	9606.ENSP00000379140	0	FALSE	interacts with	CSF3 (interacts with) CXCL12
0.788	0.057	0.791	0	0	0	0	interacts with	CSF3 (interacts with) ITGAM	0	9606.ENSP00000225474	9606.ENSP00000496959	0	FALSE	interacts with	CSF3 (interacts with) ITGAM
0.668	0	0.792	0.4	0	0	0	interacts with	CSF3 (interacts with) IL18	0	9606.ENSP00000225474	9606.ENSP00000280357	0	FALSE	interacts with	CSF3 (interacts with) IL18
0.786	0.08	0.794	0	0	0	0	interacts with	CSF3 (interacts with) CXCL9	0	9606.ENSP00000225474	9606.ENSP00000354901	0	FALSE	interacts with	CSF3 (interacts with) CXCL9
0.802	0	0.807	0	0.066	0	0	interacts with	CSF3 (interacts with) ELANE	0	9606.ENSP00000225474	9606.ENSP00000466090	0	FALSE	interacts with	CSF3 (interacts with) ELANE
0.801	0.124	0.818	0	0	0	0	interacts with	CSF3 (interacts with) IL4	0	9606.ENSP00000225474	9606.ENSP00000231449	0	FALSE	interacts with	CSF3 (interacts with) IL4
0.814	0.146	0.834	0	0	0	0	interacts with	CSF3 (interacts with) IL13	0	9606.ENSP00000225474	9606.ENSP00000304915	0	FALSE	interacts with	CSF3 (interacts with) IL13
0.827	0.121	0.842	0	0	0	0	interacts with	CSF3 (interacts with) IL5	0	9606.ENSP00000225474	9606.ENSP00000231454	0	FALSE	interacts with	CSF3 (interacts with) IL5
0.61	0.042	0.857	0.65	0	0	0	interacts with	CSF3 (interacts with) EGFR	0	9606.ENSP00000225474	9606.ENSP00000275493	0	FALSE	interacts with	CSF3 (interacts with) EGFR
0.845	0.099	0.908	0.4	0	0	0	interacts with	CSF3 (interacts with) CXCL10	0	9606.ENSP00000225474	9606.ENSP00000305651	0	FALSE	interacts with	CSF3 (interacts with) CXCL10
0.848	0.083	0.909	0.4	0	0	0	interacts with	CSF3 (interacts with) CCL4	0	9606.ENSP00000225474	9606.ENSP00000482259	0	FALSE	interacts with	CSF3 (interacts with) CCL4
0.84	0	0.916	0.5	0	0	0	interacts with	CSF3 (interacts with) STAT3	0	9606.ENSP00000225474	9606.ENSP00000264657	0	FALSE	interacts with	CSF3 (interacts with) STAT3
0.881	0.056	0.927	0.4	0	0	0	interacts with	CSF3 (interacts with) IL10	0	9606.ENSP00000225474	9606.ENSP00000412237	0	FALSE	interacts with	CSF3 (interacts with) IL10
0.907	0.258	0.928	0	0	0	0	interacts with	CSF3 (interacts with) IL17A	0	9606.ENSP00000225474	9606.ENSP00000497968	0	FALSE	interacts with	CSF3 (interacts with) IL17A
0.879	0.104	0.929	0.4	0	0	0	interacts with	CSF3 (interacts with) CCL3	0	9606.ENSP00000225474	9606.ENSP00000477908	0	FALSE	interacts with	CSF3 (interacts with) CCL3
0.875	0.146	0.93	0.4	0	0	0	interacts with	CSF3 (interacts with) CCL2	0	9606.ENSP00000225474	9606.ENSP00000225831	0	FALSE	interacts with	CSF3 (interacts with) CCL2
0.932	0.063	0.933	0	0	0	0	interacts with	CSF3 (interacts with) CSF1	0	9606.ENSP00000225474	9606.ENSP00000327513	0	FALSE	interacts with	CSF3 (interacts with) CSF1
0.894	0.047	0.934	0.4	0	0	0	interacts with	CSF3 (interacts with) CCL5	0	9606.ENSP00000225474	9606.ENSP00000474412	0	FALSE	interacts with	CSF3 (interacts with) CCL5
0.907	0.167	0.949	0.4	0	0	0	interacts with	CSF3 (interacts with) TNF	0	9606.ENSP00000225474	9606.ENSP00000398698	0	FALSE	interacts with	CSF3 (interacts with) TNF
0.96	0.087	0.961	0	0	0	0	interacts with	CSF3 (interacts with) FGF2	0	9606.ENSP00000225474	9606.ENSP00000264498	0	FALSE	interacts with	CSF3 (interacts with) FGF2
0.96	0.106	0.962	0	0	0	0	interacts with	CSF3 (interacts with) IL2	0	9606.ENSP00000225474	9606.ENSP00000226730	0	FALSE	interacts with	CSF3 (interacts with) IL2
0.945	0.201	0.971	0.4	0	0	0	interacts with	CSF3 (interacts with) CXCL8	0	9606.ENSP00000225474	9606.ENSP00000306512	0	FALSE	interacts with	CSF3 (interacts with) CXCL8
0.972	0.369	0.988	0.4	0	0	0	interacts with	CSF3 (interacts with) IL6	0	9606.ENSP00000225474	9606.ENSP00000385675	0	FALSE	interacts with	CSF3 (interacts with) IL6
0.988	0.098	0.989	0	0	0	0	interacts with	CSF3 (interacts with) IFNG	0	9606.ENSP00000225474	9606.ENSP00000229135	0	FALSE	interacts with	CSF3 (interacts with) IFNG
0.983	0.255	0.991	0.4	0	0	0	interacts with	CSF3 (interacts with) IL1A	0	9606.ENSP00000225474	9606.ENSP00000263339	0	FALSE	interacts with	CSF3 (interacts with) IL1A
0.993	0.239	0.996	0.4	0	0	0	interacts with	CSF3 (interacts with) IL1B	0	9606.ENSP00000225474	9606.ENSP00000263341	0	FALSE	interacts with	CSF3 (interacts with) IL1B
0.998	0.4	0.999	0.4	0	0	0	interacts with	CSF3 (interacts with) CSF2	0	9606.ENSP00000225474	9606.ENSP00000296871	0	FALSE	interacts with	CSF3 (interacts with) CSF2
0.698	0	0.7	0	0.049	0	0	interacts with	CTNNB1 (interacts with) CD4	0	9606.ENSP00000495360	9606.ENSP00000011653	0	FALSE	interacts with	CTNNB1 (interacts with) CD4
0.713	0.117	0.736	0	0	0	0	interacts with	CTNNB1 (interacts with) MAPK1	0	9606.ENSP00000495360	9606.ENSP00000215832	0	FALSE	interacts with	CTNNB1 (interacts with) MAPK1
0.798	0.056	0.803	0	0.049	0	0	interacts with	CTNNB1 (interacts with) MMP2	0	9606.ENSP00000495360	9606.ENSP00000219070	0	FALSE	interacts with	CTNNB1 (interacts with) MMP2
0.785	0.048	0.789	0	0.051	0	0	interacts with	CTNNB1 (interacts with) TGFB1	0	9606.ENSP00000495360	9606.ENSP00000221930	0	FALSE	interacts with	CTNNB1 (interacts with) TGFB1
0.845	0.06	0.964	0	0.777	0	0	interacts with	CTNNB1 (interacts with) NFKB1	0	9606.ENSP00000495360	9606.ENSP00000226574	0	FALSE	interacts with	CTNNB1 (interacts with) NFKB1
0.713	0	0.713	0	0	0	0	interacts with	CTNNB1 (interacts with) IFNG	0	9606.ENSP00000495360	9606.ENSP00000229135	0	FALSE	interacts with	CTNNB1 (interacts with) IFNG
0.668	0.102	0.838	0.5	0	0	0	interacts with	CTNNB1 (interacts with) MAPK14	0	9606.ENSP00000495360	9606.ENSP00000229795	0	FALSE	interacts with	CTNNB1 (interacts with) MAPK14
0.815	0.067	0.824	0	0.067	0	0	interacts with	CTNNB1 (interacts with) MMP7	0	9606.ENSP00000495360	9606.ENSP00000260227	0	FALSE	interacts with	CTNNB1 (interacts with) MMP7
0.999	0.063	0.999	0.9	0.999	0	0	interacts with	CTNNB1 (interacts with) CDH1	0	9606.ENSP00000495360	9606.ENSP00000261769	0	FALSE	interacts with	CTNNB1 (interacts with) CDH1
0.991	0.1	0.998	0.5	0.673	0	0	interacts with	CTNNB1 (interacts with) SMAD2	0	9606.ENSP00000495360	9606.ENSP00000262160	0	FALSE	interacts with	CTNNB1 (interacts with) SMAD2
0.745	0	0.745	0	0	0	0	interacts with	CTNNB1 (interacts with) IL1B	0	9606.ENSP00000495360	9606.ENSP00000263341	0	FALSE	interacts with	CTNNB1 (interacts with) IL1B
0.718	0	0.718	0	0	0	0	interacts with	CTNNB1 (interacts with) FGF2	0	9606.ENSP00000495360	9606.ENSP00000264498	0	FALSE	interacts with	CTNNB1 (interacts with) FGF2
0.887	0.128	0.897	0	0	0	0	interacts with	CTNNB1 (interacts with) STAT3	0	9606.ENSP00000495360	9606.ENSP00000264657	0	FALSE	interacts with	CTNNB1 (interacts with) STAT3
0.927	0.049	0.927	0	0	0	0	interacts with	CTNNB1 (interacts with) TP53	0	9606.ENSP00000495360	9606.ENSP00000269305	0	FALSE	interacts with	CTNNB1 (interacts with) TP53
0.94	0.064	0.998	0.9	0.718	0	0	interacts with	CTNNB1 (interacts with) EGFR	0	9606.ENSP00000495360	9606.ENSP00000275493	0	FALSE	interacts with	CTNNB1 (interacts with) EGFR
0.98	0.052	0.994	0	0.735	0	0	interacts with	CTNNB1 (interacts with) PPARG	0	9606.ENSP00000495360	9606.ENSP00000287820	0	FALSE	interacts with	CTNNB1 (interacts with) PPARG
0.731	0.055	0.734	0	0	0	0	interacts with	CTNNB1 (interacts with) CXCL8	0	9606.ENSP00000495360	9606.ENSP00000306512	0	FALSE	interacts with	CTNNB1 (interacts with) CXCL8
0.782	0.088	0.965	0.75	0.395	0	0	interacts with	CTNNB1 (interacts with) CASP3	0	9606.ENSP00000495360	9606.ENSP00000311032	0	FALSE	interacts with	CTNNB1 (interacts with) CASP3
0.98	0.074	0.999	0.8	0.768	0	0	interacts with	CTNNB1 (interacts with) SMAD3	0	9606.ENSP00000495360	9606.ENSP00000332973	0	FALSE	interacts with	CTNNB1 (interacts with) SMAD3
0.843	0.076	0.85	0	0.049	0	0	interacts with	CTNNB1 (interacts with) FN1	0	9606.ENSP00000495360	9606.ENSP00000346839	0	FALSE	interacts with	CTNNB1 (interacts with) FN1
0.664	0.104	0.768	0	0.292	0	0	interacts with	CTNNB1 (interacts with) PTGS2	0	9606.ENSP00000495360	9606.ENSP00000356438	0	FALSE	interacts with	CTNNB1 (interacts with) PTGS2
0.784	0.086	0.799	0	0.066	0	0	interacts with	CTNNB1 (interacts with) MMP9	0	9606.ENSP00000495360	9606.ENSP00000361405	0	FALSE	interacts with	CTNNB1 (interacts with) MMP9
0.571	0.079	0.719	0	0.345	0	0	interacts with	CTNNB1 (interacts with) MAPK8	0	9606.ENSP00000495360	9606.ENSP00000378974	0	FALSE	interacts with	CTNNB1 (interacts with) MAPK8
0.828	0.053	0.897	0	0.409	0	0	interacts with	CTNNB1 (interacts with) GAPDH		9606.ENSP00000495360	9606.ENSP00000380070	0	FALSE	interacts with	CTNNB1 (interacts with) GAPDH
0.719	0.067	0.727	0	0	0	0	interacts with	CTNNB1 (interacts with) INS	0	9606.ENSP00000495360	9606.ENSP00000380432	0	FALSE	interacts with	CTNNB1 (interacts with) INS
0.779	0.051	0.781	0	0	0	0	interacts with	CTNNB1 (interacts with) BCL2	0	9606.ENSP00000495360	9606.ENSP00000381185	0	FALSE	interacts with	CTNNB1 (interacts with) BCL2
0.813	0	0.813	0	0	0	0	interacts with	CTNNB1 (interacts with) IL6	0	9606.ENSP00000495360	9606.ENSP00000385675	0	FALSE	interacts with	CTNNB1 (interacts with) IL6
0.737	0	0.737	0	0	0	0	interacts with	CTNNB1 (interacts with) CD8A	0	9606.ENSP00000495360	9606.ENSP00000386559	0	FALSE	interacts with	CTNNB1 (interacts with) CD8A
0.715	0	0.715	0	0	0	0	interacts with	CTNNB1 (interacts with) TNF	0	9606.ENSP00000495360	9606.ENSP00000398698	0	FALSE	interacts with	CTNNB1 (interacts with) TNF
0.575	0.066	0.735	0	0.386	0	0	interacts with	CTNNB1 (interacts with) PTPRC	0	9606.ENSP00000495360	9606.ENSP00000411355	0	FALSE	interacts with	CTNNB1 (interacts with) PTPRC
0.989	0.26	0.998	0	0.785	0	0	interacts with	CTNNB1 (interacts with) HIF1A	0	9606.ENSP00000495360	9606.ENSP00000437955	0	FALSE	interacts with	CTNNB1 (interacts with) HIF1A
0.728	0.083	0.74	0	0	0	0	interacts with	CTNNB1 (interacts with) VIM	0	9606.ENSP00000495360	9606.ENSP00000446007	0	FALSE	interacts with	CTNNB1 (interacts with) VIM
0.93	0.074	0.979	0.4	0.539	0	0	interacts with	CTNNB1 (interacts with) AKT1	0	9606.ENSP00000495360	9606.ENSP00000451828	0	FALSE	interacts with	CTNNB1 (interacts with) AKT1
0.993	0	0.998	0	0.835	0	0	interacts with	CTNNB1 (interacts with) MUC1	0	9606.ENSP00000495360	9606.ENSP00000484824	0	FALSE	interacts with	CTNNB1 (interacts with) MUC1
0.717	0.177	0.77	0	0.091	0	0	interacts with	CX3CR1 (interacts with) CD4	0	9606.ENSP00000351059	9606.ENSP00000011653	0	FALSE	interacts with	CX3CR1 (interacts with) CD4
0.449	0	0.799	0.65	0.045	0	0	interacts with	CX3CR1 (interacts with) CCL17	0	9606.ENSP00000351059	9606.ENSP00000219244	0	FALSE	interacts with	CX3CR1 (interacts with) CCL17
0.996	0.056	0.998	0.65	0.071	0	0	interacts with	CX3CR1 (interacts with) CCL2	0	9606.ENSP00000351059	9606.ENSP00000225831	0	FALSE	interacts with	CX3CR1 (interacts with) CCL2
0.741	0.076	0.75	0	0	0	0	interacts with	CX3CR1 (interacts with) CD68	0	9606.ENSP00000351059	9606.ENSP00000250092	0	FALSE	interacts with	CX3CR1 (interacts with) CD68
0.72	0.114	0.741	0	0	0	0	interacts with	CX3CR1 (interacts with) TLR2	0	9606.ENSP00000351059	9606.ENSP00000260010	0	FALSE	interacts with	CX3CR1 (interacts with) TLR2
0.726	0.08	0.737	0	0	0	0	interacts with	CX3CR1 (interacts with) IL1B	0	9606.ENSP00000351059	9606.ENSP00000263341	0	FALSE	interacts with	CX3CR1 (interacts with) IL1B
0.704	0.058	0.709	0	0	0	0	interacts with	CX3CR1 (interacts with) ICAM1	0	9606.ENSP00000351059	9606.ENSP00000264832	0	FALSE	interacts with	CX3CR1 (interacts with) ICAM1
0.577	0.256	0.835	0.5	0	0	0.882	interacts with	CX3CR1 (interacts with) CCR2	0	9606.ENSP00000351059	9606.ENSP00000292301	0.079	FALSE	interacts with	CX3CR1 (interacts with) CCR2
0.871	0.049	0.953	0.65	0	0	0	interacts with	CX3CR1 (interacts with) CXCL10	0	9606.ENSP00000351059	9606.ENSP00000305651	0	FALSE	interacts with	CX3CR1 (interacts with) CXCL10
0.765	0	0.914	0.65	0	0	0	interacts with	CX3CR1 (interacts with) CXCL8	0	9606.ENSP00000351059	9606.ENSP00000306512	0	FALSE	interacts with	CX3CR1 (interacts with) CXCL8
0.67	0.138	0.703	0	0	0	0	interacts with	CX3CR1 (interacts with) CD8A	0	9606.ENSP00000351059	9606.ENSP00000386559	0	FALSE	interacts with	CX3CR1 (interacts with) CD8A
0.718	0.065	0.725	0	0	0	0	interacts with	CX3CR1 (interacts with) IL10	0	9606.ENSP00000351059	9606.ENSP00000412237	0	FALSE	interacts with	CX3CR1 (interacts with) IL10
0.72	0.085	0.732	0	0	0	0	interacts with	CX3CR1 (interacts with) ITGAX	0	9606.ENSP00000351059	9606.ENSP00000454623	0	FALSE	interacts with	CX3CR1 (interacts with) ITGAX
0.717	0.156	0.75	0	0	0	0	interacts with	CX3CR1 (interacts with) PTPRC	0	9606.ENSP00000351059	9606.ENSP00000411355	0	FALSE	interacts with	CX3CR1 (interacts with) PTPRC
0.377	0.102	0.787	0.65	0	0	0	interacts with	CX3CR1 (interacts with) CCL18	0	9606.ENSP00000351059	9606.ENSP00000479955	0	FALSE	interacts with	CX3CR1 (interacts with) CCL18
0.774	0.063	0.79	0	0.091	0	0	interacts with	CX3CR1 (interacts with) CD163	0	9606.ENSP00000351059	9606.ENSP00000352071	0	FALSE	interacts with	CX3CR1 (interacts with) CD163
0.789	0.214	0.827	0	0	0	0	interacts with	CX3CR1 (interacts with) ITGAM	0	9606.ENSP00000351059	9606.ENSP00000496959	0	FALSE	interacts with	CX3CR1 (interacts with) ITGAM
0.583	0.072	0.852	0.65	0	0	0	interacts with	CX3CR1 (interacts with) CCL4	0	9606.ENSP00000351059	9606.ENSP00000482259	0	FALSE	interacts with	CX3CR1 (interacts with) CCL4
0.7	0.047	0.891	0.65	0	0	0	interacts with	CX3CR1 (interacts with) CXCL9	0	9606.ENSP00000351059	9606.ENSP00000354901	0	FALSE	interacts with	CX3CR1 (interacts with) CXCL9
0.912	0.11	0.97	0.65	0	0	0	interacts with	CX3CR1 (interacts with) CCL3	0	9606.ENSP00000351059	9606.ENSP00000477908	0	FALSE	interacts with	CX3CR1 (interacts with) CCL3
0.974	0.044	0.99	0.65	0.046	0	0	interacts with	CX3CR1 (interacts with) CXCL12	0	9606.ENSP00000351059	9606.ENSP00000379140	0	FALSE	interacts with	CX3CR1 (interacts with) CXCL12
0.981	0.126	0.993	0.65	0.045	0	0	interacts with	CX3CR1 (interacts with) CCL5	0	9606.ENSP00000351059	9606.ENSP00000474412	0	FALSE	interacts with	CX3CR1 (interacts with) CCL5
0.83	0.09	0.839	0	0	0	0	interacts with	CXCL10 (interacts with) CD4	0	9606.ENSP00000305651	9606.ENSP00000011653	0	FALSE	interacts with	CXCL10 (interacts with) CD4
0.731	0.09	0.744	0	0	0	0	interacts with	CXCL10 (interacts with) TIMP1	0	9606.ENSP00000305651	9606.ENSP00000218388	0	FALSE	interacts with	CXCL10 (interacts with) TIMP1
0.857	0.21	0.883	0	0	0	0	interacts with	CXCL10 (interacts with) CCL17	0	9606.ENSP00000305651	9606.ENSP00000219244	0	FALSE	interacts with	CXCL10 (interacts with) CCL17
0.845	0.099	0.908	0.4	0	0	0	interacts with	CXCL10 (interacts with) CSF3	0	9606.ENSP00000305651	9606.ENSP00000225474	0	FALSE	interacts with	CXCL10 (interacts with) CSF3
0.915	0.373	0.965	0.4	0	0	0	interacts with	CXCL10 (interacts with) CCL2	0	9606.ENSP00000305651	9606.ENSP00000225831	0	FALSE	interacts with	CXCL10 (interacts with) CCL2
0.831	0.122	0.845	0	0	0	0	interacts with	CXCL10 (interacts with) NFKB1	0	9606.ENSP00000305651	9606.ENSP00000226574	0	FALSE	interacts with	CXCL10 (interacts with) NFKB1
0.852	0.072	0.857	0	0	0	0	interacts with	CXCL10 (interacts with) IL2	0	9606.ENSP00000305651	9606.ENSP00000226730	0	FALSE	interacts with	CXCL10 (interacts with) IL2
0.942	0.321	0.959	0	0	0	0	interacts with	CXCL10 (interacts with) IFNG	0	9606.ENSP00000305651	9606.ENSP00000229135	0	FALSE	interacts with	CXCL10 (interacts with) IFNG
0.882	0.044	0.882	0	0	0	0	interacts with	CXCL10 (interacts with) IL4	0	9606.ENSP00000305651	9606.ENSP00000231449	0	FALSE	interacts with	CXCL10 (interacts with) IL4
0.801	0.044	0.801	0	0	0	0	interacts with	CXCL10 (interacts with) IL5	0	9606.ENSP00000305651	9606.ENSP00000231454	0	FALSE	interacts with	CXCL10 (interacts with) IL5
0.719	0.084	0.732	0	0	0	0	interacts with	CXCL10 (interacts with) CD68	0	9606.ENSP00000305651	9606.ENSP00000250092	0	FALSE	interacts with	CXCL10 (interacts with) CD68
0.765	0	0.765	0	0	0	0	interacts with	CXCL10 (interacts with) CRP	0	9606.ENSP00000305651	9606.ENSP00000255030	0	FALSE	interacts with	CXCL10 (interacts with) CRP
0.887	0.168	0.902	0	0	0	0	interacts with	CXCL10 (interacts with) TLR2	0	9606.ENSP00000305651	9606.ENSP00000260010	0	FALSE	interacts with	CXCL10 (interacts with) TLR2
0.925	0.146	0.958	0.4	0	0	0	interacts with	CXCL10 (interacts with) IL1A	0	9606.ENSP00000305651	9606.ENSP00000263339	0	FALSE	interacts with	CXCL10 (interacts with) IL1A
0.925	0.229	0.962	0.4	0	0	0	interacts with	CXCL10 (interacts with) IL1B	0	9606.ENSP00000305651	9606.ENSP00000263341	0	FALSE	interacts with	CXCL10 (interacts with) IL1B
0.634	0.098	0.82	0.5	0	0	0	interacts with	CXCL10 (interacts with) STAT3	0	9606.ENSP00000305651	9606.ENSP00000264657	0	FALSE	interacts with	CXCL10 (interacts with) STAT3
0.817	0.257	0.858	0	0	0	0	interacts with	CXCL10 (interacts with) ICAM1	0	9606.ENSP00000305651	9606.ENSP00000264832	0	FALSE	interacts with	CXCL10 (interacts with) ICAM1
0.818	0.081	0.825	0	0	0	0	interacts with	CXCL10 (interacts with) IFNA1	0	9606.ENSP00000305651	9606.ENSP00000276927	0	FALSE	interacts with	CXCL10 (interacts with) IFNA1
0.773	0.069	0.862	0.4	0	0	0	interacts with	CXCL10 (interacts with) IL18	0	9606.ENSP00000305651	9606.ENSP00000280357	0	FALSE	interacts with	CXCL10 (interacts with) IL18
0.995	0.139	0.998	0.65	0	0	0	interacts with	CXCL10 (interacts with) CCR2	0	9606.ENSP00000305651	9606.ENSP00000292301	0	FALSE	interacts with	CXCL10 (interacts with) CCR2
0.85	0.089	0.911	0.4	0	0	0	interacts with	CXCL10 (interacts with) CSF2	0	9606.ENSP00000305651	9606.ENSP00000296871	0	FALSE	interacts with	CXCL10 (interacts with) CSF2
0.871	0.042	0.871	0	0	0	0	interacts with	CXCL10 (interacts with) IL13	0	9606.ENSP00000305651	9606.ENSP00000304915	0	FALSE	interacts with	CXCL10 (interacts with) IL13
0.624	0.279	0.717	0	0	0	0	interacts with	CXCL10 (interacts with) CCL18	0	9606.ENSP00000305651	9606.ENSP00000479955	0	FALSE	interacts with	CXCL10 (interacts with) CCL18
0.706	0.11	0.728	0	0	0	0	interacts with	CXCL10 (interacts with) CSF1	0	9606.ENSP00000305651	9606.ENSP00000327513	0	FALSE	interacts with	CXCL10 (interacts with) CSF1
0.725	0.067	0.732	0	0	0	0	interacts with	CXCL10 (interacts with) MMP1	0	9606.ENSP00000305651	9606.ENSP00000322788	0	FALSE	interacts with	CXCL10 (interacts with) MMP1
0.754	0.119	0.774	0	0	0	0	interacts with	CXCL10 (interacts with) ITGAM	0	9606.ENSP00000305651	9606.ENSP00000496959	0	FALSE	interacts with	CXCL10 (interacts with) ITGAM
0.845	0.071	0.85	0	0	0	0	interacts with	CXCL10 (interacts with) IL17A	0	9606.ENSP00000305651	9606.ENSP00000497968	0	FALSE	interacts with	CXCL10 (interacts with) IL17A
0.858	0.11	0.868	0	0	0	0	interacts with	CXCL10 (interacts with) MMP9	0	9606.ENSP00000305651	9606.ENSP00000361405	0	FALSE	interacts with	CXCL10 (interacts with) MMP9
0.871	0.162	0.887	0	0	0	0	interacts with	CXCL10 (interacts with) CD8A	0	9606.ENSP00000305651	9606.ENSP00000386559	0	FALSE	interacts with	CXCL10 (interacts with) CD8A
0.783	0.521	0.891	0	0	0	0	interacts with	CXCL10 (interacts with) IFIH1	0	9606.ENSP00000305651	9606.ENSP00000497271	0	FALSE	interacts with	CXCL10 (interacts with) IFIH1
0.893	0.303	0.951	0.4	0	0	0	interacts with	CXCL10 (interacts with) CCL3	0	9606.ENSP00000305651	9606.ENSP00000477908	0	FALSE	interacts with	CXCL10 (interacts with) CCL3
0.871	0.049	0.953	0.65	0	0	0	interacts with	CXCL10 (interacts with) CX3CR1	0	9606.ENSP00000305651	9606.ENSP00000351059	0	FALSE	interacts with	CXCL10 (interacts with) CX3CR1
0.889	0.328	0.959	0.5	0	0	0	interacts with	CXCL10 (interacts with) CCL4	0	9606.ENSP00000305651	9606.ENSP00000482259	0	FALSE	interacts with	CXCL10 (interacts with) CCL4
0.923	0.203	0.96	0.4	0	0	0	interacts with	CXCL10 (interacts with) IL6	0	9606.ENSP00000305651	9606.ENSP00000385675	0	FALSE	interacts with	CXCL10 (interacts with) IL6
0.925	0.225	0.962	0.4	0	0	0	interacts with	CXCL10 (interacts with) IL10	0	9606.ENSP00000305651	9606.ENSP00000412237	0	FALSE	interacts with	CXCL10 (interacts with) IL10
0.93	0.265	0.966	0.4	0	0	0	interacts with	CXCL10 (interacts with) TNF	0	9606.ENSP00000305651	9606.ENSP00000398698	0	FALSE	interacts with	CXCL10 (interacts with) TNF
0.968	0.081	0.969	0	0	0	0	interacts with	CXCL10 (interacts with) TLR4	0	9606.ENSP00000305651	9606.ENSP00000363089	0	FALSE	interacts with	CXCL10 (interacts with) TLR4
0.948	0.124	0.975	0.5	0	0	0	interacts with	CXCL10 (interacts with) CXCL8	0	9606.ENSP00000305651	9606.ENSP00000306512	0	FALSE	interacts with	CXCL10 (interacts with) CXCL8
0.95	0.362	0.999	0.5	0.994	0	0	interacts with	CXCL10 (interacts with) CCL5	0	9606.ENSP00000305651	9606.ENSP00000474412	0	FALSE	interacts with	CXCL10 (interacts with) CCL5
0.857	0.104	0.999	0.5	0.994	0	0	interacts with	CXCL10 (interacts with) CXCL12	0	9606.ENSP00000305651	9606.ENSP00000379140	0	FALSE	interacts with	CXCL10 (interacts with) CXCL12
0.444	0.836	0.999	0.9	0.994	0	0.856	interacts with	CXCL10 (interacts with) CXCL9	0	9606.ENSP00000305651	9606.ENSP00000354901	0	FALSE	interacts with	CXCL10 (interacts with) CXCL9
0.802	0.06	0.825	0	0.134	0	0	interacts with	CXCL12 (interacts with) CD4	0	9606.ENSP00000379140	9606.ENSP00000011653	0	FALSE	interacts with	CXCL12 (interacts with) CD4
0.736	0.045	0.737	0	0	0	0	interacts with	CXCL12 (interacts with) TIMP1	0	9606.ENSP00000379140	9606.ENSP00000218388	0	FALSE	interacts with	CXCL12 (interacts with) TIMP1
0.719	0.187	0.762	0	0	0	0	interacts with	CXCL12 (interacts with) MMP2	0	9606.ENSP00000379140	9606.ENSP00000219070	0	FALSE	interacts with	CXCL12 (interacts with) MMP2
0.783	0.109	0.798	0	0	0	0	interacts with	CXCL12 (interacts with) TGFB1	0	9606.ENSP00000379140	9606.ENSP00000221930	0	FALSE	interacts with	CXCL12 (interacts with) TGFB1
0.743	0.072	0.751	0	0	0	0	interacts with	CXCL12 (interacts with) HGF	0	9606.ENSP00000379140	9606.ENSP00000222390	0	FALSE	interacts with	CXCL12 (interacts with) HGF
0.786	0	0.786	0	0	0	0	interacts with	CXCL12 (interacts with) CSF3	0	9606.ENSP00000379140	9606.ENSP00000225474	0	FALSE	interacts with	CXCL12 (interacts with) CSF3
0.818	0.162	0.841	0	0	0	0	interacts with	CXCL12 (interacts with) CCL2	0	9606.ENSP00000379140	9606.ENSP00000225831	0	FALSE	interacts with	CXCL12 (interacts with) CCL2
0.713	0	0.713	0	0	0	0	interacts with	CXCL12 (interacts with) IFNG	0	9606.ENSP00000379140	9606.ENSP00000229135	0	FALSE	interacts with	CXCL12 (interacts with) IFNG
0.771	0	0.771	0	0	0	0	interacts with	CXCL12 (interacts with) IL4	0	9606.ENSP00000379140	9606.ENSP00000231449	0	FALSE	interacts with	CXCL12 (interacts with) IL4
0.722	0.054	0.726	0	0	0	0	interacts with	CXCL12 (interacts with) CDH1	0	9606.ENSP00000379140	9606.ENSP00000261769	0	FALSE	interacts with	CXCL12 (interacts with) CDH1
0.742	0.087	0.755	0	0	0	0	interacts with	CXCL12 (interacts with) IL1B	0	9606.ENSP00000379140	9606.ENSP00000263341	0	FALSE	interacts with	CXCL12 (interacts with) IL1B
0.893	0.067	0.896	0	0	0	0	interacts with	CXCL12 (interacts with) FGF2	0	9606.ENSP00000379140	9606.ENSP00000264498	0	FALSE	interacts with	CXCL12 (interacts with) FGF2
0.895	0.067	0.897	0	0	0	0	interacts with	CXCL12 (interacts with) EGFR	0	9606.ENSP00000379140	9606.ENSP00000275493	0	FALSE	interacts with	CXCL12 (interacts with) EGFR
0.718	0	0.718	0	0	0	0	interacts with	CXCL12 (interacts with) IL18	0	9606.ENSP00000379140	9606.ENSP00000280357	0	FALSE	interacts with	CXCL12 (interacts with) IL18
0.997	0.05	0.998	0.65	0.046	0	0	interacts with	CXCL12 (interacts with) CCR2	0	9606.ENSP00000379140	9606.ENSP00000292301	0	FALSE	interacts with	CXCL12 (interacts with) CCR2
0.857	0.104	0.999	0.5	0.994	0	0	interacts with	CXCL12 (interacts with) CXCL10	0	9606.ENSP00000379140	9606.ENSP00000305651	0	FALSE	interacts with	CXCL12 (interacts with) CXCL10
0.904	0.067	0.951	0.5	0	0	0	interacts with	CXCL12 (interacts with) CXCL8	0	9606.ENSP00000379140	9606.ENSP00000306512	0	FALSE	interacts with	CXCL12 (interacts with) CXCL8
0.68	0.103	0.701	0	0	0	0	interacts with	CXCL12 (interacts with) CSF1	0	9606.ENSP00000379140	9606.ENSP00000327513	0	FALSE	interacts with	CXCL12 (interacts with) CSF1
0.979	0.042	0.984	0	0.292	0	0	interacts with	CXCL12 (interacts with) HMGB1	0	9606.ENSP00000379140	9606.ENSP00000345347	0	FALSE	interacts with	CXCL12 (interacts with) HMGB1
0.831	0.112	0.884	0	0.292	0	0	interacts with	CXCL12 (interacts with) FN1	0	9606.ENSP00000379140	9606.ENSP00000346839	0	FALSE	interacts with	CXCL12 (interacts with) FN1
0.974	0.044	0.99	0.65	0.046	0	0	interacts with	CXCL12 (interacts with) CX3CR1	0	9606.ENSP00000379140	9606.ENSP00000351059	0	FALSE	interacts with	CXCL12 (interacts with) CX3CR1
0.955	0.16	0.999	0.5	0.994	0	0	interacts with	CXCL12 (interacts with) CXCL9	0	9606.ENSP00000379140	9606.ENSP00000354901	0	FALSE	interacts with	CXCL12 (interacts with) CXCL9
0.888	0.066	0.891	0	0	0	0	interacts with	CXCL12 (interacts with) MMP9	0	9606.ENSP00000379140	9606.ENSP00000361405	0	FALSE	interacts with	CXCL12 (interacts with) MMP9
0.816	0.066	0.821	0	0	0	0	interacts with	CXCL12 (interacts with) TLR4	0	9606.ENSP00000379140	9606.ENSP00000363089	0	FALSE	interacts with	CXCL12 (interacts with) TLR4
0.795	0.277	0.845	0	0	0	0	interacts with	CXCL12 (interacts with) IGF1	0	9606.ENSP00000379140	9606.ENSP00000376637	0	FALSE	interacts with	CXCL12 (interacts with) IGF1
0.697	0.056	0.701	0	0	0	0	interacts with	CXCL12 (interacts with) CD8A	0	9606.ENSP00000379140	9606.ENSP00000386559	0	FALSE	interacts with	CXCL12 (interacts with) CD8A
0.722	0	0.722	0	0	0	0	interacts with	CXCL12 (interacts with) AKT1	0	9606.ENSP00000379140	9606.ENSP00000451828	0	FALSE	interacts with	CXCL12 (interacts with) AKT1
0.725	0	0.725	0	0	0	0	interacts with	CXCL12 (interacts with) IL10	0	9606.ENSP00000379140	9606.ENSP00000412237	0	FALSE	interacts with	CXCL12 (interacts with) IL10
0.721	0.062	0.727	0	0	0	0	interacts with	CXCL12 (interacts with) BCL2	0	9606.ENSP00000379140	9606.ENSP00000381185	0	FALSE	interacts with	CXCL12 (interacts with) BCL2
0.734	0.099	0.75	0	0	0	0	interacts with	CXCL12 (interacts with) TNF	0	9606.ENSP00000379140	9606.ENSP00000398698	0	FALSE	interacts with	CXCL12 (interacts with) TNF
0.792	0.13	0.811	0	0	0	0	interacts with	CXCL12 (interacts with) IL6	0	9606.ENSP00000379140	9606.ENSP00000385675	0	FALSE	interacts with	CXCL12 (interacts with) IL6
0.808	0.116	0.823	0	0	0	0	interacts with	CXCL12 (interacts with) CCL3	0	9606.ENSP00000379140	9606.ENSP00000477908	0	FALSE	interacts with	CXCL12 (interacts with) CCL3
0.812	0.103	0.824	0	0	0	0	interacts with	CXCL12 (interacts with) HIF1A	0	9606.ENSP00000379140	9606.ENSP00000437955	0	FALSE	interacts with	CXCL12 (interacts with) HIF1A
0.817	0.097	0.827	0	0	0	0	interacts with	CXCL12 (interacts with) PTPRC	0	9606.ENSP00000379140	9606.ENSP00000411355	0	FALSE	interacts with	CXCL12 (interacts with) PTPRC
0.875	0.072	0.948	0.5	0	0	0	interacts with	CXCL12 (interacts with) CCL4	0	9606.ENSP00000379140	9606.ENSP00000482259	0.219	FALSE	interacts with	CXCL12 (interacts with) CCL4
0.904	0.062	0.999	0.5	0.994	0	0	interacts with	CXCL12 (interacts with) CCL5	0	9606.ENSP00000379140	9606.ENSP00000474412	0	FALSE	interacts with	CXCL12 (interacts with) CCL5
0.86	0.047	0.861	0	0	0	0	interacts with	CXCL8 (interacts with) CD4	0	9606.ENSP00000306512	9606.ENSP00000011653	0	FALSE	interacts with	CXCL8 (interacts with) CD4
0.735	0.044	0.735	0	0	0	0	interacts with	CXCL8 (interacts with) MAPK1	0	9606.ENSP00000306512	9606.ENSP00000215832	0	FALSE	interacts with	CXCL8 (interacts with) MAPK1
0.77	0.086	0.78	0	0	0	0	interacts with	CXCL8 (interacts with) TIMP1	0	9606.ENSP00000306512	9606.ENSP00000218388	0	FALSE	interacts with	CXCL8 (interacts with) TIMP1
0.814	0.042	0.814	0	0	0	0	interacts with	CXCL8 (interacts with) MMP2	0	9606.ENSP00000306512	9606.ENSP00000219070	0	FALSE	interacts with	CXCL8 (interacts with) MMP2
0.832	0.184	0.857	0	0	0	0	interacts with	CXCL8 (interacts with) CCL17	0	9606.ENSP00000306512	9606.ENSP00000219244	0	FALSE	interacts with	CXCL8 (interacts with) CCL17
0.765	0.085	0.775	0	0	0	0	interacts with	CXCL8 (interacts with) TGFB1	0	9606.ENSP00000306512	9606.ENSP00000221930	0	FALSE	interacts with	CXCL8 (interacts with) TGFB1
0.691	0.076	0.702	0	0	0	0	interacts with	CXCL8 (interacts with) HGF	0	9606.ENSP00000306512	9606.ENSP00000222390	0	FALSE	interacts with	CXCL8 (interacts with) HGF
0.691	0.182	0.736	0	0	0	0	interacts with	CXCL8 (interacts with) SERPINE1	0	9606.ENSP00000306512	9606.ENSP00000223095	0	FALSE	interacts with	CXCL8 (interacts with) SERPINE1
0.945	0.201	0.971	0.4	0	0	0	interacts with	CXCL8 (interacts with) CSF3	0	9606.ENSP00000306512	9606.ENSP00000225474	0	FALSE	interacts with	CXCL8 (interacts with) CSF3
0.948	0.487	0.999	0.4	0.994	0	0	interacts with	CXCL8 (interacts with) CCL2	0	9606.ENSP00000306512	9606.ENSP00000225831	0	FALSE	interacts with	CXCL8 (interacts with) CCL2
0.881	0.143	0.988	0.9	0	0	0	interacts with	CXCL8 (interacts with) NFKB1	0	9606.ENSP00000306512	9606.ENSP00000226574	0	FALSE	interacts with	CXCL8 (interacts with) NFKB1
0.985	0.048	0.985	0	0	0	0	interacts with	CXCL8 (interacts with) IL2	0	9606.ENSP00000306512	9606.ENSP00000226730	0	FALSE	interacts with	CXCL8 (interacts with) IL2
0.942	0.152	0.961	0	0	0	0	interacts with	CXCL8 (interacts with) IFNG	0	9606.ENSP00000306512	9606.ENSP00000229135	0.281	FALSE	interacts with	CXCL8 (interacts with) IFNG
0.996	0.049	0.997	0.4	0	0	0	interacts with	CXCL8 (interacts with) IL4	0	9606.ENSP00000306512	9606.ENSP00000231449	0	FALSE	interacts with	CXCL8 (interacts with) IL4
0.932	0	0.932	0	0	0	0	interacts with	CXCL8 (interacts with) IL5	0	9606.ENSP00000306512	9606.ENSP00000231454	0	FALSE	interacts with	CXCL8 (interacts with) IL5
0.874	0.043	0.874	0	0	0	0	interacts with	CXCL8 (interacts with) CRP	0	9606.ENSP00000306512	9606.ENSP00000255030	0	FALSE	interacts with	CXCL8 (interacts with) CRP
0.897	0.319	0.926	0	0	0	0	interacts with	CXCL8 (interacts with) IL1RN	0	9606.ENSP00000306512	9606.ENSP00000259206	0	FALSE	interacts with	CXCL8 (interacts with) IL1RN
0.869	0.144	0.883	0	0	0	0	interacts with	CXCL8 (interacts with) TLR2	0	9606.ENSP00000306512	9606.ENSP00000260010	0	FALSE	interacts with	CXCL8 (interacts with) TLR2
0.928	0.451	0.974	0.4	0	0	0	interacts with	CXCL8 (interacts with) IL1A	0	9606.ENSP00000306512	9606.ENSP00000263339	0	FALSE	interacts with	CXCL8 (interacts with) IL1A
0.962	0.776	0.994	0.4	0	0	0	interacts with	CXCL8 (interacts with) IL1B	0	9606.ENSP00000306512	9606.ENSP00000263341	0	FALSE	interacts with	CXCL8 (interacts with) IL1B
0.854	0.066	0.857	0	0	0	0	interacts with	CXCL8 (interacts with) FGF2	0	9606.ENSP00000306512	9606.ENSP00000264498	0	FALSE	interacts with	CXCL8 (interacts with) FGF2
0.72	0.066	0.857	0.5	0	0	0	interacts with	CXCL8 (interacts with) STAT3	0	9606.ENSP00000306512	9606.ENSP00000264657	0	FALSE	interacts with	CXCL8 (interacts with) STAT3
0.927	0.259	0.943	0	0	0	0	interacts with	CXCL8 (interacts with) ICAM1	0	9606.ENSP00000306512	9606.ENSP00000264832	0	FALSE	interacts with	CXCL8 (interacts with) ICAM1
0.777	0	0.804	0	0.161	0	0	interacts with	CXCL8 (interacts with) TP53	0	9606.ENSP00000306512	9606.ENSP00000269305	0	FALSE	interacts with	CXCL8 (interacts with) TP53
0.792	0	0.792	0	0	0	0	interacts with	CXCL8 (interacts with) EGFR	0	9606.ENSP00000306512	9606.ENSP00000275493	0	FALSE	interacts with	CXCL8 (interacts with) EGFR
0.774	0.055	0.777	0	0	0	0	interacts with	CXCL8 (interacts with) IFNA1	0	9606.ENSP00000306512	9606.ENSP00000276927	0	FALSE	interacts with	CXCL8 (interacts with) IFNA1
0.877	0.087	0.926	0.4	0	0	0	interacts with	CXCL8 (interacts with) IL18	0	9606.ENSP00000306512	9606.ENSP00000280357	0	FALSE	interacts with	CXCL8 (interacts with) IL18
0.995	0.06	0.998	0.65	0	0	0	interacts with	CXCL8 (interacts with) CCR2	0	9606.ENSP00000306512	9606.ENSP00000292301	0	FALSE	interacts with	CXCL8 (interacts with) CCR2
0.942	0.277	0.972	0.4	0	0	0	interacts with	CXCL8 (interacts with) CSF2	0	9606.ENSP00000306512	9606.ENSP00000296871	0	FALSE	interacts with	CXCL8 (interacts with) CSF2
0.904	0.049	0.94	0.4	0	0	0	interacts with	CXCL8 (interacts with) IL13	0	9606.ENSP00000306512	9606.ENSP00000304915	0	FALSE	interacts with	CXCL8 (interacts with) IL13
0.948	0.124	0.975	0.5	0	0	0	interacts with	CXCL8 (interacts with) CXCL10	0	9606.ENSP00000306512	9606.ENSP00000305651	0	FALSE	interacts with	CXCL8 (interacts with) CXCL10
0.702	0	0.702	0	0	0	0	interacts with	CXCL8 (interacts with) SFTPD	0	9606.ENSP00000306512	9606.ENSP00000361366	0	FALSE	interacts with	CXCL8 (interacts with) SFTPD
0.666	0.178	0.714	0	0	0	0	interacts with	CXCL8 (interacts with) CSF1	0	9606.ENSP00000306512	9606.ENSP00000327513	0	FALSE	interacts with	CXCL8 (interacts with) CSF1
0.667	0.184	0.716	0	0	0	0	interacts with	CXCL8 (interacts with) HIF1A	0	9606.ENSP00000306512	9606.ENSP00000437955	0	FALSE	interacts with	CXCL8 (interacts with) HIF1A
0.72	0	0.72	0	0	0	0	interacts with	CXCL8 (interacts with) AKT1	0	9606.ENSP00000306512	9606.ENSP00000451828	0	FALSE	interacts with	CXCL8 (interacts with) AKT1
0.731	0.055	0.734	0	0	0	0	interacts with	CXCL8 (interacts with) CTNNB1	0	9606.ENSP00000306512	9606.ENSP00000495360	0	FALSE	interacts with	CXCL8 (interacts with) CTNNB1
0.751	0.045	0.752	0	0	0	0	interacts with	CXCL8 (interacts with) CASP3	0	9606.ENSP00000306512	9606.ENSP00000311032	0	FALSE	interacts with	CXCL8 (interacts with) CASP3
0.732	0.124	0.755	0	0	0	0	interacts with	CXCL8 (interacts with) SPP1	0	9606.ENSP00000306512	9606.ENSP00000378517	0	FALSE	interacts with	CXCL8 (interacts with) SPP1
0.72	0.186	0.762	0	0	0	0	interacts with	CXCL8 (interacts with) MMP1	0	9606.ENSP00000306512	9606.ENSP00000322788	0	FALSE	interacts with	CXCL8 (interacts with) MMP1
0.798	0.048	0.799	0	0	0	0	interacts with	CXCL8 (interacts with) IL33	0	9606.ENSP00000306512	9606.ENSP00000370842	0	FALSE	interacts with	CXCL8 (interacts with) IL33
0.795	0.079	0.803	0	0	0	0	interacts with	CXCL8 (interacts with) EDN1	0	9606.ENSP00000306512	9606.ENSP00000368683	0	FALSE	interacts with	CXCL8 (interacts with) EDN1
0.821	0.062	0.824	0	0	0	0	interacts with	CXCL8 (interacts with) ELANE	0	9606.ENSP00000306512	9606.ENSP00000466090	0	FALSE	interacts with	CXCL8 (interacts with) ELANE
0.844	0.043	0.844	0	0	0	0	interacts with	CXCL8 (interacts with) CD8A	0	9606.ENSP00000306512	9606.ENSP00000386559	0	FALSE	interacts with	CXCL8 (interacts with) CD8A
0.846	0.047	0.846	0	0	0	0	interacts with	CXCL8 (interacts with) FN1	0	9606.ENSP00000306512	9606.ENSP00000346839	0	FALSE	interacts with	CXCL8 (interacts with) FN1
0.824	0.208	0.855	0	0	0	0	interacts with	CXCL8 (interacts with) CCL18	0	9606.ENSP00000306512	9606.ENSP00000479955	0	FALSE	interacts with	CXCL8 (interacts with) CCL18
0.867	0.14	0.88	0	0	0	0	interacts with	CXCL8 (interacts with) MMP9	0	9606.ENSP00000306512	9606.ENSP00000361405	0	FALSE	interacts with	CXCL8 (interacts with) MMP9
0.765	0	0.914	0.65	0	0	0	interacts with	CXCL8 (interacts with) CX3CR1	0	9606.ENSP00000306512	9606.ENSP00000351059	0	FALSE	interacts with	CXCL8 (interacts with) CX3CR1
0.923	0.06	0.924	0	0	0	0	interacts with	CXCL8 (interacts with) IL17A	0	9606.ENSP00000306512	9606.ENSP00000497968	0	FALSE	interacts with	CXCL8 (interacts with) IL17A
0.93	0.086	0.933	0	0	0	0	interacts with	CXCL8 (interacts with) TLR4	0	9606.ENSP00000306512	9606.ENSP00000363089	0	FALSE	interacts with	CXCL8 (interacts with) TLR4
0.904	0.067	0.951	0.5	0	0	0	interacts with	CXCL8 (interacts with) CXCL12	0	9606.ENSP00000306512	9606.ENSP00000379140	0	FALSE	interacts with	CXCL8 (interacts with) CXCL12
0.921	0.062	0.959	0.5	0	0	0	interacts with	CXCL8 (interacts with) CXCL9	0	9606.ENSP00000306512	9606.ENSP00000354901	0	FALSE	interacts with	CXCL8 (interacts with) CXCL9
0.946	0.147	0.97	0.4	0	0	0	interacts with	CXCL8 (interacts with) IL10	0	9606.ENSP00000306512	9606.ENSP00000412237	0	FALSE	interacts with	CXCL8 (interacts with) IL10
0.901	0.767	0.975	0	0	0	0	interacts with	CXCL8 (interacts with) PTGS2	0	9606.ENSP00000306512	9606.ENSP00000356438	0	FALSE	interacts with	CXCL8 (interacts with) PTGS2
0.931	0.497	0.977	0.4	0	0	0	interacts with	CXCL8 (interacts with) CCL3	0	9606.ENSP00000306512	9606.ENSP00000477908	0	FALSE	interacts with	CXCL8 (interacts with) CCL3
0.937	0.217	0.98	0.5	0.292	0	0	interacts with	CXCL8 (interacts with) CCL5	0	9606.ENSP00000306512	9606.ENSP00000474412	0	FALSE	interacts with	CXCL8 (interacts with) CCL5
0.965	0.294	0.983	0.4	0	0	0	interacts with	CXCL8 (interacts with) TNF	0	9606.ENSP00000306512	9606.ENSP00000398698	0	FALSE	interacts with	CXCL8 (interacts with) TNF
0.969	0.282	0.988	0.5	0	0	0	interacts with	CXCL8 (interacts with) CCL4	0	9606.ENSP00000306512	9606.ENSP00000482259	0	FALSE	interacts with	CXCL8 (interacts with) CCL4
0.976	0.445	0.991	0.4	0	0	0	interacts with	CXCL8 (interacts with) IL6	0	9606.ENSP00000306512	9606.ENSP00000385675	0	FALSE	interacts with	CXCL8 (interacts with) IL6
0.773	0.114	0.79	0	0	0	0	interacts with	CXCL9 (interacts with) CD4	0	9606.ENSP00000354901	9606.ENSP00000011653	0	FALSE	interacts with	CXCL9 (interacts with) CD4
0.735	0.241	0.791	0	0	0	0	interacts with	CXCL9 (interacts with) CCL17	0	9606.ENSP00000354901	9606.ENSP00000219244	0	FALSE	interacts with	CXCL9 (interacts with) CCL17
0.786	0.08	0.794	0	0	0	0	interacts with	CXCL9 (interacts with) CSF3	0	9606.ENSP00000354901	9606.ENSP00000225474	0	FALSE	interacts with	CXCL9 (interacts with) CSF3
0.901	0.237	0.999	0	0.994	0	0	interacts with	CXCL9 (interacts with) CCL2	0	9606.ENSP00000354901	9606.ENSP00000225831	0	FALSE	interacts with	CXCL9 (interacts with) CCL2
0.727	0.083	0.738	0	0	0	0	interacts with	CXCL9 (interacts with) IL2	0	9606.ENSP00000354901	9606.ENSP00000226730	0	FALSE	interacts with	CXCL9 (interacts with) IL2
0.923	0.352	0.948	0	0	0	0	interacts with	CXCL9 (interacts with) IFNG	0	9606.ENSP00000354901	9606.ENSP00000229135	0	FALSE	interacts with	CXCL9 (interacts with) IFNG
0.734	0.043	0.735	0	0	0	0	interacts with	CXCL9 (interacts with) IL4	0	9606.ENSP00000354901	9606.ENSP00000231449	0	FALSE	interacts with	CXCL9 (interacts with) IL4
0.716	0.049	0.718	0	0	0	0	interacts with	CXCL9 (interacts with) IL5	0	9606.ENSP00000354901	9606.ENSP00000231454	0	FALSE	interacts with	CXCL9 (interacts with) IL5
0.66	0.158	0.701	0	0	0	0	interacts with	CXCL9 (interacts with) IL1RN	0	9606.ENSP00000354901	9606.ENSP00000259206	0	FALSE	interacts with	CXCL9 (interacts with) IL1RN
0.702	0.163	0.739	0	0	0	0	interacts with	CXCL9 (interacts with) TLR2	0	9606.ENSP00000354901	9606.ENSP00000260010	0	FALSE	interacts with	CXCL9 (interacts with) TLR2
0.722	0.067	0.73	0	0	0	0	interacts with	CXCL9 (interacts with) IL1A	0	9606.ENSP00000354901	9606.ENSP00000263339	0	FALSE	interacts with	CXCL9 (interacts with) IL1A
0.838	0.141	0.855	0	0	0	0	interacts with	CXCL9 (interacts with) IL1B	0	9606.ENSP00000354901	9606.ENSP00000263341	0	FALSE	interacts with	CXCL9 (interacts with) IL1B
0.72	0.068	0.728	0	0	0	0	interacts with	CXCL9 (interacts with) IFNA1	0	9606.ENSP00000354901	9606.ENSP00000276927	0	FALSE	interacts with	CXCL9 (interacts with) IFNA1
0.695	0.073	0.705	0	0	0	0	interacts with	CXCL9 (interacts with) IL18	0	9606.ENSP00000354901	9606.ENSP00000280357	0	FALSE	interacts with	CXCL9 (interacts with) IL18
0.979	0.137	0.993	0.65	0	0	0	interacts with	CXCL9 (interacts with) CCR2	0	9606.ENSP00000354901	9606.ENSP00000292301	0	FALSE	interacts with	CXCL9 (interacts with) CCR2
0.728	0.071	0.736	0	0	0	0	interacts with	CXCL9 (interacts with) CSF2	0	9606.ENSP00000354901	9606.ENSP00000296871	0	FALSE	interacts with	CXCL9 (interacts with) CSF2
0.72	0.047	0.722	0	0	0	0	interacts with	CXCL9 (interacts with) IL13	0	9606.ENSP00000354901	9606.ENSP00000304915	0	FALSE	interacts with	CXCL9 (interacts with) IL13
0.444	0.836	0.999	0.9	0.994	0	0.856	interacts with	CXCL9 (interacts with) CXCL10	0	9606.ENSP00000354901	9606.ENSP00000305651	0	FALSE	interacts with	CXCL9 (interacts with) CXCL10
0.921	0.062	0.959	0.5	0	0	0	interacts with	CXCL9 (interacts with) CXCL8	0	9606.ENSP00000354901	9606.ENSP00000306512	0	FALSE	interacts with	CXCL9 (interacts with) CXCL8
0.7	0.047	0.891	0.65	0	0	0	interacts with	CXCL9 (interacts with) CX3CR1	0	9606.ENSP00000354901	9606.ENSP00000351059	0	FALSE	interacts with	CXCL9 (interacts with) CX3CR1
0.722	0.246	0.781	0	0	0	0	interacts with	CXCL9 (interacts with) CD163	0	9606.ENSP00000354901	9606.ENSP00000352071	0	FALSE	interacts with	CXCL9 (interacts with) CD163
0.622	0.433	0.776	0	0	0	0	interacts with	CXCL9 (interacts with) CCL18	0	9606.ENSP00000354901	9606.ENSP00000479955	0	FALSE	interacts with	CXCL9 (interacts with) CCL18
0.79	0.155	0.815	0	0	0	0	interacts with	CXCL9 (interacts with) TNF	0	9606.ENSP00000354901	9606.ENSP00000398698	0	FALSE	interacts with	CXCL9 (interacts with) TNF
0.796	0.129	0.815	0	0	0	0	interacts with	CXCL9 (interacts with) IL6	0	9606.ENSP00000354901	9606.ENSP00000385675	0	FALSE	interacts with	CXCL9 (interacts with) IL6
0.794	0.157	0.819	0	0	0	0	interacts with	CXCL9 (interacts with) IL10	0	9606.ENSP00000354901	9606.ENSP00000412237	0	FALSE	interacts with	CXCL9 (interacts with) IL10
0.823	0.081	0.83	0	0	0	0	interacts with	CXCL9 (interacts with) IL17A	0	9606.ENSP00000354901	9606.ENSP00000497968	0	FALSE	interacts with	CXCL9 (interacts with) IL17A
0.79	0.307	0.848	0	0	0	0	interacts with	CXCL9 (interacts with) CD8A	0	9606.ENSP00000354901	9606.ENSP00000386559	0	FALSE	interacts with	CXCL9 (interacts with) CD8A
0.85	0.257	0.884	0	0	0	0	interacts with	CXCL9 (interacts with) CCL3	0	9606.ENSP00000354901	9606.ENSP00000477908	0	FALSE	interacts with	CXCL9 (interacts with) CCL3
0.889	0.32	0.959	0.5	0	0	0	interacts with	CXCL9 (interacts with) CCL4	0	9606.ENSP00000354901	9606.ENSP00000482259	0	FALSE	interacts with	CXCL9 (interacts with) CCL4
0.955	0.16	0.999	0.5	0.994	0	0	interacts with	CXCL9 (interacts with) CXCL12	0	9606.ENSP00000354901	9606.ENSP00000379140	0	FALSE	interacts with	CXCL9 (interacts with) CXCL12
0.948	0.371	0.999	0.5	0.994	0	0	interacts with	CXCL9 (interacts with) CCL5	0	9606.ENSP00000354901	9606.ENSP00000474412	0	FALSE	interacts with	CXCL9 (interacts with) CCL5
0.601	0.042	0.958	0.9	0	0	0	interacts with	EDN1 (interacts with) MMP2	0	9606.ENSP00000368683	9606.ENSP00000219070	0	FALSE	interacts with	EDN1 (interacts with) MMP2
0.743	0.083	0.755	0	0	0	0	interacts with	EDN1 (interacts with) SERPINE1	0	9606.ENSP00000368683	9606.ENSP00000223095	0	FALSE	interacts with	EDN1 (interacts with) SERPINE1
0.773	0.118	0.791	0	0	0	0	interacts with	EDN1 (interacts with) CCL2	0	9606.ENSP00000368683	9606.ENSP00000225831	0	FALSE	interacts with	EDN1 (interacts with) CCL2
0.784	0.126	0.803	0	0	0	0	interacts with	EDN1 (interacts with) IL1B	0	9606.ENSP00000368683	9606.ENSP00000263341	0	FALSE	interacts with	EDN1 (interacts with) IL1B
0.748	0.094	0.762	0	0	0	0	interacts with	EDN1 (interacts with) FGF2	0	9606.ENSP00000368683	9606.ENSP00000264498	0	FALSE	interacts with	EDN1 (interacts with) FGF2
0.779	0.129	0.799	0	0	0	0	interacts with	EDN1 (interacts with) ICAM1	0	9606.ENSP00000368683	9606.ENSP00000264832	0	FALSE	interacts with	EDN1 (interacts with) ICAM1
0.724	0.042	0.724	0	0	0	0	interacts with	EDN1 (interacts with) PPARG	0	9606.ENSP00000368683	9606.ENSP00000287820	0	FALSE	interacts with	EDN1 (interacts with) PPARG
0.795	0.079	0.803	0	0	0	0	interacts with	EDN1 (interacts with) CXCL8	0	9606.ENSP00000368683	9606.ENSP00000306512	0	FALSE	interacts with	EDN1 (interacts with) CXCL8
0.751	0.179	0.787	0	0	0	0	interacts with	EDN1 (interacts with) CCN2	0	9606.ENSP00000368683	9606.ENSP00000356954	0	FALSE	interacts with	EDN1 (interacts with) CCN2
0.648	0.044	0.963	0.9	0	0	0	interacts with	EDN1 (interacts with) MMP9	0	9606.ENSP00000368683	9606.ENSP00000361405	0	FALSE	interacts with	EDN1 (interacts with) MMP9
0.72	0.083	0.732	0	0	0	0	interacts with	EDN1 (interacts with) TNF	0	9606.ENSP00000368683	9606.ENSP00000398698	0	FALSE	interacts with	EDN1 (interacts with) TNF
0.742	0.128	0.765	0	0	0	0	interacts with	EDN1 (interacts with) IL6	0	9606.ENSP00000368683	9606.ENSP00000385675	0	FALSE	interacts with	EDN1 (interacts with) IL6
0.797	0	0.797	0	0	0	0	interacts with	EDN1 (interacts with) INS	0	9606.ENSP00000368683	9606.ENSP00000380432	0	FALSE	interacts with	EDN1 (interacts with) INS
0.972	0	0.975	0	0.152	0	0	interacts with	EGFR (interacts with) TGFB1	0	9606.ENSP00000275493	9606.ENSP00000221930	0	FALSE	interacts with	EGFR (interacts with) TGFB1
0.947	0	0.98	0.65	0	0	0	interacts with	EGFR (interacts with) HGF	0	9606.ENSP00000275493	9606.ENSP00000222390	0	FALSE	interacts with	EGFR (interacts with) HGF
0.61	0.042	0.857	0.65	0	0	0	interacts with	EGFR (interacts with) CSF3	0	9606.ENSP00000275493	9606.ENSP00000225474	0	FALSE	interacts with	EGFR (interacts with) CSF3
0.72	0.06	0.725	0	0	0	0	interacts with	EGFR (interacts with) CCL2	0	9606.ENSP00000275493	9606.ENSP00000225831	0	FALSE	interacts with	EGFR (interacts with) CCL2
0.835	0.05	0.837	0	0.045	0	0	interacts with	EGFR (interacts with) NFKB1	0	9606.ENSP00000275493	9606.ENSP00000226574	0	FALSE	interacts with	EGFR (interacts with) NFKB1
0.593	0	0.851	0.65	0	0	0	interacts with	EGFR (interacts with) IL2	0	9606.ENSP00000275493	9606.ENSP00000226730	0	FALSE	interacts with	EGFR (interacts with) IL2
0.661	0	0.876	0.65	0	0	0	interacts with	EGFR (interacts with) IFNG	0	9606.ENSP00000275493	9606.ENSP00000229135	0	FALSE	interacts with	EGFR (interacts with) IFNG
0.519	0.042	0.799	0	0.6	0	0.579	interacts with	EGFR (interacts with) MAPK14	0	9606.ENSP00000275493	9606.ENSP00000229795	0	FALSE	interacts with	EGFR (interacts with) MAPK14
0.507	0	0.82	0.65	0	0	0	interacts with	EGFR (interacts with) IL4	0	9606.ENSP00000275493	9606.ENSP00000231449	0	FALSE	interacts with	EGFR (interacts with) IL4
0.348	0	0.762	0.65	0	0	0	interacts with	EGFR (interacts with) IL5	0	9606.ENSP00000275493	9606.ENSP00000231454	0	FALSE	interacts with	EGFR (interacts with) IL5
0.759	0	0.933	0	0.733	0	0	interacts with	EGFR (interacts with) TLR2	0	9606.ENSP00000275493	9606.ENSP00000260010	0	FALSE	interacts with	EGFR (interacts with) TLR2
0.995	0.055	0.999	0	0.815	0	0	interacts with	EGFR (interacts with) CDH1	0	9606.ENSP00000275493	9606.ENSP00000261769	0	FALSE	interacts with	EGFR (interacts with) CDH1
0.728	0.07	0.736	0	0	0	0	interacts with	EGFR (interacts with) SMAD2	0	9606.ENSP00000275493	9606.ENSP00000262160	0	FALSE	interacts with	EGFR (interacts with) SMAD2
0.701	0.043	0.701	0	0	0	0	interacts with	EGFR (interacts with) IL1A	0	9606.ENSP00000275493	9606.ENSP00000263339	0	FALSE	interacts with	EGFR (interacts with) IL1A
0.873	0	0.873	0	0	0	0	interacts with	EGFR (interacts with) IL1B	0	9606.ENSP00000275493	9606.ENSP00000263341	0	FALSE	interacts with	EGFR (interacts with) IL1B
0.877	0.099	0.957	0.65	0	0	0	interacts with	EGFR (interacts with) FGF2	0	9606.ENSP00000275493	9606.ENSP00000264498	0	FALSE	interacts with	EGFR (interacts with) FGF2
0.985	0.042	0.998	0	0.925	0	0	interacts with	EGFR (interacts with) STAT3	0	9606.ENSP00000275493	9606.ENSP00000264657	0	FALSE	interacts with	EGFR (interacts with) STAT3
0.864	0.042	0.877	0	0.135	0	0	interacts with	EGFR (interacts with) ICAM1	0	9606.ENSP00000275493	9606.ENSP00000264832	0	FALSE	interacts with	EGFR (interacts with) ICAM1
0.919	0	0.943	0	0.329	0	0	interacts with	EGFR (interacts with) TP53	0	9606.ENSP00000275493	9606.ENSP00000269305	0	FALSE	interacts with	EGFR (interacts with) TP53
0.669	0.152	0.711	0	0.053	0	0	interacts with	EGFR (interacts with) TGFB2	0	9606.ENSP00000275493	9606.ENSP00000355896	0	FALSE	interacts with	EGFR (interacts with) TGFB2
0.626	0	0.739	0	0.331	0	0	interacts with	EGFR (interacts with) TLR4	0	9606.ENSP00000275493	9606.ENSP00000363089	0	FALSE	interacts with	EGFR (interacts with) TLR4
0.741	0.061	0.747	0	0	0	0	interacts with	EGFR (interacts with) CASP3	0	9606.ENSP00000275493	9606.ENSP00000311032	0	FALSE	interacts with	EGFR (interacts with) CASP3
0.676	0	0.749	0	0.258	0	0	interacts with	EGFR (interacts with) PTPRC	0	9606.ENSP00000275493	9606.ENSP00000411355	0	FALSE	interacts with	EGFR (interacts with) PTPRC
0.445	0.042	0.792	0	0.64	0	0.559	interacts with	EGFR (interacts with) AKT1	0	9606.ENSP00000275493	9606.ENSP00000451828	0	FALSE	interacts with	EGFR (interacts with) AKT1
0.792	0	0.792	0	0	0	0	interacts with	EGFR (interacts with) CXCL8	0	9606.ENSP00000275493	9606.ENSP00000306512	0	FALSE	interacts with	EGFR (interacts with) CXCL8
0.694	0.146	0.799	0	0.292	0	0	interacts with	EGFR (interacts with) CCN2	0	9606.ENSP00000275493	9606.ENSP00000356954	0	FALSE	interacts with	EGFR (interacts with) CCN2
0.769	0.042	0.802	0	0.181	0	0	interacts with	EGFR (interacts with) MTOR	0	9606.ENSP00000275493	9606.ENSP00000354558	0	FALSE	interacts with	EGFR (interacts with) MTOR
0.477	0	0.809	0.65	0	0	0	interacts with	EGFR (interacts with) IL13	0	9606.ENSP00000275493	9606.ENSP00000304915	0	FALSE	interacts with	EGFR (interacts with) IL13
0.812	0	0.812	0	0	0	0	interacts with	EGFR (interacts with) SPP1	0	9606.ENSP00000275493	9606.ENSP00000378517	0	FALSE	interacts with	EGFR (interacts with) SPP1
0.505	0	0.819	0.65	0	0	0	interacts with	EGFR (interacts with) IFNA1	0	9606.ENSP00000275493	9606.ENSP00000276927	0	FALSE	interacts with	EGFR (interacts with) IFNA1
0.825	0.055	0.827	0	0	0	0	interacts with	EGFR (interacts with) MMP9	0	9606.ENSP00000275493	9606.ENSP00000361405	0	FALSE	interacts with	EGFR (interacts with) MMP9
0.567	0.047	0.83	0	0.621	0	0.567	interacts with	EGFR (interacts with) MAPK8	0	9606.ENSP00000275493	9606.ENSP00000378974	0	FALSE	interacts with	EGFR (interacts with) MAPK8
0.831	0.068	0.836	0	0	0	0	interacts with	EGFR (interacts with) PTGS2	0	9606.ENSP00000275493	9606.ENSP00000356438	0	FALSE	interacts with	EGFR (interacts with) PTGS2
0.838	0.048	0.839	0	0	0	0	interacts with	EGFR (interacts with) BCL2	0	9606.ENSP00000275493	9606.ENSP00000381185	0	FALSE	interacts with	EGFR (interacts with) BCL2
0.569	0.042	0.842	0.65	0	0	0	interacts with	EGFR (interacts with) CSF2	0	9606.ENSP00000275493	9606.ENSP00000296871	0	FALSE	interacts with	EGFR (interacts with) CSF2
0.758	0.112	0.843	0	0.329	0	0	interacts with	EGFR (interacts with) PPARG	0	9606.ENSP00000275493	9606.ENSP00000287820	0	FALSE	interacts with	EGFR (interacts with) PPARG
0.89	0	0.89	0	0	0	0	interacts with	EGFR (interacts with) TNF	0	9606.ENSP00000275493	9606.ENSP00000398698	0	FALSE	interacts with	EGFR (interacts with) TNF
0.895	0.067	0.897	0	0	0	0	interacts with	EGFR (interacts with) CXCL12	0	9606.ENSP00000275493	9606.ENSP00000379140	0	FALSE	interacts with	EGFR (interacts with) CXCL12
0.724	0	0.899	0.65	0	0	0	interacts with	EGFR (interacts with) IL10	0	9606.ENSP00000275493	9606.ENSP00000412237	0	FALSE	interacts with	EGFR (interacts with) IL10
0.873	0.055	0.934	0.5	0	0	0	interacts with	EGFR (interacts with) HIF1A	0	9606.ENSP00000275493	9606.ENSP00000437955	0	FALSE	interacts with	EGFR (interacts with) HIF1A
0.834	0.072	0.941	0.65	0	0	0	interacts with	EGFR (interacts with) CSF1	0	9606.ENSP00000275493	9606.ENSP00000327513	0	FALSE	interacts with	EGFR (interacts with) CSF1
0.916	0.138	0.944	0	0.292	0	0	interacts with	EGFR (interacts with) FN1	0	9606.ENSP00000275493	9606.ENSP00000346839	0	FALSE	interacts with	EGFR (interacts with) FN1
0.803	0.06	0.955	0	0.779	0	0	interacts with	EGFR (interacts with) GAPDH	0	9606.ENSP00000275493	9606.ENSP00000380070	0	FALSE	interacts with	EGFR (interacts with) GAPDH
0.943	0.042	0.979	0.65	0	0	0	interacts with	EGFR (interacts with) IL6	0	9606.ENSP00000275493	9606.ENSP00000385675	0	FALSE	interacts with	EGFR (interacts with) IL6
0.919	0	0.991	0.9	0	0	0	interacts with	EGFR (interacts with) IGF1	0	9606.ENSP00000275493	9606.ENSP00000376637	0	FALSE	interacts with	EGFR (interacts with) IGF1
0.93	0	0.992	0.9	0	0	0	interacts with	EGFR (interacts with) INS	0	9606.ENSP00000275493	9606.ENSP00000380432	0	FALSE	interacts with	EGFR (interacts with) INS
0.94	0.064	0.998	0.9	0.718	0	0	interacts with	EGFR (interacts with) CTNNB1	0	9606.ENSP00000275493	9606.ENSP00000495360	0	FALSE	interacts with	EGFR (interacts with) CTNNB1
0.998	0.062	0.999	0.9	0.983	0	0	interacts with	EGFR (interacts with) TGFA	0	9606.ENSP00000275493	9606.ENSP00000404131	0	FALSE	interacts with	EGFR (interacts with) TGFA
0.994	0.074	0.999	0	0.835	0	0	interacts with	EGFR (interacts with) MUC1	0	9606.ENSP00000275493	9606.ENSP00000484824	0	FALSE	interacts with	EGFR (interacts with) MUC1
0.802	0	0.807	0	0.066	0	0	interacts with	ELANE (interacts with) CSF3	0	9606.ENSP00000466090	9606.ENSP00000225474	0	FALSE	interacts with	ELANE (interacts with) CSF3
0.821	0.062	0.824	0	0	0	0	interacts with	ELANE (interacts with) CXCL8	0	9606.ENSP00000466090	9606.ENSP00000306512	0	FALSE	interacts with	ELANE (interacts with) CXCL8
0.868	0.044	0.869	0	0.045	0	0	interacts with	ELANE (interacts with) HMGB1	0	9606.ENSP00000466090	9606.ENSP00000345347	0	FALSE	interacts with	ELANE (interacts with) HMGB1
0.7	0.055	0.705	0	0	0	0	interacts with	ELANE (interacts with) FN1	0	9606.ENSP00000466090	9606.ENSP00000346839	0	FALSE	interacts with	ELANE (interacts with) FN1
0.972	0.085	0.973	0	0	0	0	interacts with	ELANE (interacts with) MMP9	0	9606.ENSP00000466090	9606.ENSP00000361405	0	FALSE	interacts with	ELANE (interacts with) MMP9
0.723	0.074	0.732	0	0	0	0	interacts with	ELANE (interacts with) TLR4	0	9606.ENSP00000466090	9606.ENSP00000363089	0	FALSE	interacts with	ELANE (interacts with) TLR4
0.74	0.055	0.744	0	0	0	0	interacts with	ELANE (interacts with) MMP12	0	9606.ENSP00000466090	9606.ENSP00000458585	0	FALSE	interacts with	ELANE (interacts with) MMP12
0.72	0.097	0.736	0	0	0	0	interacts with	ELANE (interacts with) ITGAM	0	9606.ENSP00000466090	9606.ENSP00000496959	0	FALSE	interacts with	ELANE (interacts with) ITGAM
0.865	0.063	0.868	0	0	0	0	interacts with	FASLG (interacts with) CD4	0	9606.ENSP00000356694	9606.ENSP00000011653	0	FALSE	interacts with	FASLG (interacts with) CD4
0.716	0	0.724	0	0.071	0	0	interacts with	FASLG (interacts with) TGFB1	0	9606.ENSP00000356694	9606.ENSP00000221930	0	FALSE	interacts with	FASLG (interacts with) TGFB1
0.734	0.054	0.737	0	0	0	0	interacts with	FASLG (interacts with) CCL2	0	9606.ENSP00000356694	9606.ENSP00000225831	0	FALSE	interacts with	FASLG (interacts with) CCL2
0.806	0.13	0.824	0	0	0	0	interacts with	FASLG (interacts with) IL2	0	9606.ENSP00000356694	9606.ENSP00000226730	0	FALSE	interacts with	FASLG (interacts with) IL2
0.856	0.555	0.933	0	0	0	0	interacts with	FASLG (interacts with) IFNG	0	9606.ENSP00000356694	9606.ENSP00000229135	0	FALSE	interacts with	FASLG (interacts with) IFNG
0.443	0.05	0.769	0	0.599	0	0	interacts with	FASLG (interacts with) MMP7	0	9606.ENSP00000356694	9606.ENSP00000260227	0	FALSE	interacts with	FASLG (interacts with) MMP7
0.799	0.049	0.8	0	0	0	0	interacts with	FASLG (interacts with) IL1B	0	9606.ENSP00000356694	9606.ENSP00000263341	0	FALSE	interacts with	FASLG (interacts with) IL1B
0.589	0.049	0.893	0.75	0	0	0	interacts with	FASLG (interacts with) STAT3	0	9606.ENSP00000356694	9606.ENSP00000264657	0	FALSE	interacts with	FASLG (interacts with) STAT3
0.766	0.088	0.777	0	0	0	0	interacts with	FASLG (interacts with) ICAM1	0	9606.ENSP00000356694	9606.ENSP00000264832	0	FALSE	interacts with	FASLG (interacts with) ICAM1
0.703	0.087	0.718	0	0	0	0	interacts with	FASLG (interacts with) TP53	0	9606.ENSP00000356694	9606.ENSP00000269305	0	FALSE	interacts with	FASLG (interacts with) TP53
0.728	0.079	0.738	0	0	0	0	interacts with	FASLG (interacts with) CSF2	0	9606.ENSP00000356694	9606.ENSP00000296871	0	FALSE	interacts with	FASLG (interacts with) CSF2
0.888	0.074	0.892	0	0	0	0	interacts with	FASLG (interacts with) CASP3	0	9606.ENSP00000356694	9606.ENSP00000311032	0	FALSE	interacts with	FASLG (interacts with) CASP3
0.781	0	0.909	0	0.601	0	0	interacts with	FASLG (interacts with) FN1	0	9606.ENSP00000356694	9606.ENSP00000346839	0	FALSE	interacts with	FASLG (interacts with) FN1
0.703	0.082	0.715	0	0	0	0	interacts with	FASLG (interacts with) ITGAM	0	9606.ENSP00000356694	9606.ENSP00000496959	0	FALSE	interacts with	FASLG (interacts with) ITGAM
0.729	0.257	0.79	0	0	0	0	interacts with	FASLG (interacts with) CCL5	0	9606.ENSP00000356694	9606.ENSP00000474412	0	FALSE	interacts with	FASLG (interacts with) CCL5
0.809	0.049	0.811	0	0	0	0	interacts with	FASLG (interacts with) BCL2	0	9606.ENSP00000356694	9606.ENSP00000381185	0	FALSE	interacts with	FASLG (interacts with) BCL2
0.435	0.049	0.849	0	0.742	0	0	interacts with	FASLG (interacts with) MAPK8	0	9606.ENSP00000356694	9606.ENSP00000378974	0	FALSE	interacts with	FASLG (interacts with) MAPK8
0.873	0.129	0.885	0	0	0	0	interacts with	FASLG (interacts with) IL10	0	9606.ENSP00000356694	9606.ENSP00000412237	0	FALSE	interacts with	FASLG (interacts with) IL10
0.879	0.382	0.922	0	0	0	0	interacts with	FASLG (interacts with) CD8A	0	9606.ENSP00000356694	9606.ENSP00000386559	0	FALSE	interacts with	FASLG (interacts with) CD8A
0.983	0.085	0.984	0	0.053	0	0.663	interacts with	FASLG (interacts with) TNF	0	9606.ENSP00000356694	9606.ENSP00000398698	0	FALSE	interacts with	FASLG (interacts with) TNF
0.644	0.054	0.78	0.4	0	0	0	interacts with	FGF2 (interacts with) MAPK1	0	9606.ENSP00000264498	9606.ENSP00000215832	0	FALSE	interacts with	FGF2 (interacts with) MAPK1
0.622	0.067	0.77	0.4	0	0	0	interacts with	FGF2 (interacts with) TIMP1	0	9606.ENSP00000264498	9606.ENSP00000218388	0	FALSE	interacts with	FGF2 (interacts with) TIMP1
0.669	0.083	0.802	0.4	0	0	0	interacts with	FGF2 (interacts with) MMP2	0	9606.ENSP00000264498	9606.ENSP00000219070	0	FALSE	interacts with	FGF2 (interacts with) MMP2
0.97	0.062	0.982	0.4	0	0	0	interacts with	FGF2 (interacts with) TGFB1	0	9606.ENSP00000264498	9606.ENSP00000221930	0	FALSE	interacts with	FGF2 (interacts with) TGFB1
0.927	0.054	0.955	0.4	0	0	0	interacts with	FGF2 (interacts with) HGF	0	9606.ENSP00000264498	9606.ENSP00000222390	0	FALSE	interacts with	FGF2 (interacts with) HGF
0.725	0.095	0.741	0	0	0	0	interacts with	FGF2 (interacts with) SERPINE1	0	9606.ENSP00000264498	9606.ENSP00000223095	0	FALSE	interacts with	FGF2 (interacts with) SERPINE1
0.96	0.087	0.961	0	0	0	0	interacts with	FGF2 (interacts with) CSF3	0	9606.ENSP00000264498	9606.ENSP00000225474	0	FALSE	interacts with	FGF2 (interacts with) CSF3
0.715	0.101	0.732	0	0	0	0	interacts with	FGF2 (interacts with) CCL2	0	9606.ENSP00000264498	9606.ENSP00000225831	0	FALSE	interacts with	FGF2 (interacts with) CCL2
0.74	0	0.74	0	0	0	0	interacts with	FGF2 (interacts with) IL2	0	9606.ENSP00000264498	9606.ENSP00000226730	0	FALSE	interacts with	FGF2 (interacts with) IL2
0.697	0.109	0.718	0	0	0	0	interacts with	FGF2 (interacts with) IL1A	0	9606.ENSP00000264498	9606.ENSP00000263339	0	FALSE	interacts with	FGF2 (interacts with) IL1A
0.892	0.076	0.896	0	0	0	0	interacts with	FGF2 (interacts with) IL1B	0	9606.ENSP00000264498	9606.ENSP00000263341	0	FALSE	interacts with	FGF2 (interacts with) IL1B
0.709	0.069	0.717	0	0	0	0	interacts with	FGF2 (interacts with) IL13	0	9606.ENSP00000264498	9606.ENSP00000304915	0	FALSE	interacts with	FGF2 (interacts with) IL13
0.718	0	0.718	0	0	0	0	interacts with	FGF2 (interacts with) CTNNB1	0	9606.ENSP00000264498	9606.ENSP00000495360	0	FALSE	interacts with	FGF2 (interacts with) CTNNB1
0.724	0.049	0.727	0	0	0	0	interacts with	FGF2 (interacts with) HIF1A	0	9606.ENSP00000264498	9606.ENSP00000437955	0	FALSE	interacts with	FGF2 (interacts with) HIF1A
0.732	0	0.732	0	0	0	0	interacts with	FGF2 (interacts with) TNF	0	9606.ENSP00000264498	9606.ENSP00000398698	0	FALSE	interacts with	FGF2 (interacts with) TNF
0.578	0.043	0.737	0.4	0	0	0	interacts with	FGF2 (interacts with) MMP1	0	9606.ENSP00000264498	9606.ENSP00000322788	0	FALSE	interacts with	FGF2 (interacts with) MMP1
0.746	0	0.746	0	0	0	0	interacts with	FGF2 (interacts with) GAPDH	0	9606.ENSP00000264498	9606.ENSP00000380070	0	FALSE	interacts with	FGF2 (interacts with) GAPDH
0.597	0	0.747	0.4	0	0	0	interacts with	FGF2 (interacts with) IL17A	0	9606.ENSP00000264498	9606.ENSP00000497968	0	FALSE	interacts with	FGF2 (interacts with) IL17A
0.741	0.081	0.752	0	0	0	0	interacts with	FGF2 (interacts with) ICAM1	0	9606.ENSP00000264498	9606.ENSP00000264832	0	FALSE	interacts with	FGF2 (interacts with) ICAM1
0.754	0	0.754	0	0	0	0	interacts with	FGF2 (interacts with) TP53	0	9606.ENSP00000264498	9606.ENSP00000269305	0	FALSE	interacts with	FGF2 (interacts with) TP53
0.748	0.094	0.762	0	0	0	0	interacts with	FGF2 (interacts with) EDN1	0	9606.ENSP00000264498	9606.ENSP00000368683	0	FALSE	interacts with	FGF2 (interacts with) EDN1
0.775	0.1	0.789	0	0	0	0	interacts with	FGF2 (interacts with) TGFB2	0	9606.ENSP00000264498	9606.ENSP00000355896	0	FALSE	interacts with	FGF2 (interacts with) TGFB2
0.775	0.104	0.79	0	0	0	0	interacts with	FGF2 (interacts with) PTGS2	0	9606.ENSP00000264498	9606.ENSP00000356438	0	FALSE	interacts with	FGF2 (interacts with) PTGS2
0.776	0.145	0.8	0	0	0	0	interacts with	FGF2 (interacts with) CCN2	0	9606.ENSP00000264498	9606.ENSP00000356954	0	FALSE	interacts with	FGF2 (interacts with) CCN2
0.716	0	0.822	0.4	0	0	0	interacts with	FGF2 (interacts with) IL10	0	9606.ENSP00000264498	9606.ENSP00000412237	0	FALSE	interacts with	FGF2 (interacts with) IL10
0.821	0.057	0.824	0	0	0	0	interacts with	FGF2 (interacts with) TGFA	0	9606.ENSP00000264498	9606.ENSP00000404131	0	FALSE	interacts with	FGF2 (interacts with) TGFA
0.684	0	0.835	0.5	0	0	0	interacts with	FGF2 (interacts with) STAT3	0	9606.ENSP00000264498	9606.ENSP00000264657	0	FALSE	interacts with	FGF2 (interacts with) STAT3
0.836	0.074	0.842	0	0	0	0	interacts with	FGF2 (interacts with) INS	0	9606.ENSP00000264498	9606.ENSP00000380432	0	FALSE	interacts with	FGF2 (interacts with) INS
0.854	0.066	0.857	0	0	0	0	interacts with	FGF2 (interacts with) CXCL8	0	9606.ENSP00000264498	9606.ENSP00000306512	0	FALSE	interacts with	FGF2 (interacts with) CXCL8
0.882	0.043	0.882	0	0	0	0	interacts with	FGF2 (interacts with) IGF1	0	9606.ENSP00000264498	9606.ENSP00000376637	0	FALSE	interacts with	FGF2 (interacts with) IGF1
0.788	0.151	0.882	0.4	0	0	0	interacts with	FGF2 (interacts with) IL6	0	9606.ENSP00000264498	9606.ENSP00000385675	0	FALSE	interacts with	FGF2 (interacts with) IL6
0.893	0.067	0.896	0	0	0	0	interacts with	FGF2 (interacts with) CXCL12	0	9606.ENSP00000264498	9606.ENSP00000379140	0	FALSE	interacts with	FGF2 (interacts with) CXCL12
0.87	0.049	0.919	0.4	0	0	0	interacts with	FGF2 (interacts with) MMP9	0	9606.ENSP00000264498	9606.ENSP00000361405	0	FALSE	interacts with	FGF2 (interacts with) MMP9
0.859	0	0.926	0.5	0	0	0	interacts with	FGF2 (interacts with) AKT1	0	9606.ENSP00000264498	9606.ENSP00000451828	0	FALSE	interacts with	FGF2 (interacts with) AKT1
0.877	0.099	0.957	0.65	0	0	0	interacts with	FGF2 (interacts with) EGFR	0	9606.ENSP00000264498	9606.ENSP00000275493	0	FALSE	interacts with	FGF2 (interacts with) EGFR
0.964	0.076	0.965	0	0	0	0	interacts with	FGF2 (interacts with) CSF2	0	9606.ENSP00000264498	9606.ENSP00000296871	0	FALSE	interacts with	FGF2 (interacts with) CSF2
0.964	0.084	0.965	0	0	0	0	interacts with	FGF2 (interacts with) FN1	0	9606.ENSP00000264498	9606.ENSP00000346839	0	FALSE	interacts with	FGF2 (interacts with) FN1
0.912	0	0.916	0	0.092	0	0	interacts with	FN1 (interacts with) CD4	0	9606.ENSP00000346839	9606.ENSP00000011653	0	FALSE	interacts with	FN1 (interacts with) CD4
0.455	0	0.716	0.5	0	0	0	interacts with	FN1 (interacts with) MAPK1	0	9606.ENSP00000346839	9606.ENSP00000215832	0	FALSE	interacts with	FN1 (interacts with) MAPK1
0.913	0.087	0.954	0.4	0.16	0	0	interacts with	FN1 (interacts with) TIMP1	0	9606.ENSP00000346839	9606.ENSP00000218388	0	FALSE	interacts with	FN1 (interacts with) TIMP1
0.577	0.255	0.756	0	0.24	0	0.615	interacts with	FN1 (interacts with) MMP2	0	9606.ENSP00000346839	9606.ENSP00000219070	0.104	FALSE	interacts with	FN1 (interacts with) MMP2
0.969	0.049	0.969	0	0	0	0	interacts with	FN1 (interacts with) TGFB1	0	9606.ENSP00000346839	9606.ENSP00000221930	0	FALSE	interacts with	FN1 (interacts with) TGFB1
0.947	0.055	0.967	0	0.394	0	0	interacts with	FN1 (interacts with) HGF	0	9606.ENSP00000346839	9606.ENSP00000222390	0	FALSE	interacts with	FN1 (interacts with) HGF
0.72	0.28	0.79	0	0	0	0	interacts with	FN1 (interacts with) SERPINE1	0	9606.ENSP00000346839	9606.ENSP00000223095	0	FALSE	interacts with	FN1 (interacts with) SERPINE1
0.709	0.087	0.723	0	0	0	0	interacts with	FN1 (interacts with) CCL2	0	9606.ENSP00000346839	9606.ENSP00000225831	0	FALSE	interacts with	FN1 (interacts with) CCL2
0.912	0.335	0.974	0	0.594	0	0	interacts with	FN1 (interacts with) COL1A1	0	9606.ENSP00000346839	9606.ENSP00000225964	0	FALSE	interacts with	FN1 (interacts with) COL1A1
0.729	0	0.729	0	0	0	0	interacts with	FN1 (interacts with) NFKB1	0	9606.ENSP00000346839	9606.ENSP00000226574	0	FALSE	interacts with	FN1 (interacts with) NFKB1
0.802	0.053	0.804	0	0	0	0	interacts with	FN1 (interacts with) IL2	0	9606.ENSP00000346839	9606.ENSP00000226730	0	FALSE	interacts with	FN1 (interacts with) IL2
0.737	0.052	0.837	0.4	0	0	0	interacts with	FN1 (interacts with) IL4	0	9606.ENSP00000346839	9606.ENSP00000231449	0	FALSE	interacts with	FN1 (interacts with) IL4
0.855	0.059	0.894	0	0.292	0	0	interacts with	FN1 (interacts with) CRP	0	9606.ENSP00000346839	9606.ENSP00000255030	0	FALSE	interacts with	FN1 (interacts with) CRP
0.917	0.043	0.917	0	0	0	0	interacts with	FN1 (interacts with) TLR2	0	9606.ENSP00000346839	9606.ENSP00000260010	0	FALSE	interacts with	FN1 (interacts with) TLR2
0.777	0.047	0.778	0	0	0	0	interacts with	FN1 (interacts with) MMP7	0	9606.ENSP00000346839	9606.ENSP00000260227	0	FALSE	interacts with	FN1 (interacts with) MMP7
0.873	0	0.873	0	0.048	0	0	interacts with	FN1 (interacts with) CDH1	0	9606.ENSP00000346839	9606.ENSP00000261769	0	FALSE	interacts with	FN1 (interacts with) CDH1
0.764	0	0.765	0	0.045	0	0	interacts with	FN1 (interacts with) SMAD2	0	9606.ENSP00000346839	9606.ENSP00000262160	0	FALSE	interacts with	FN1 (interacts with) SMAD2
0.768	0.055	0.773	0	0.051	0	0	interacts with	FN1 (interacts with) IL1A	0	9606.ENSP00000346839	9606.ENSP00000263339	0	FALSE	interacts with	FN1 (interacts with) IL1A
0.866	0.055	0.869	0	0.051	0	0	interacts with	FN1 (interacts with) IL1B	0	9606.ENSP00000346839	9606.ENSP00000263341	0	FALSE	interacts with	FN1 (interacts with) IL1B
0.964	0.084	0.965	0	0	0	0	interacts with	FN1 (interacts with) FGF2	0	9606.ENSP00000346839	9606.ENSP00000264498	0	FALSE	interacts with	FN1 (interacts with) FGF2
0.796	0	0.988	0.5	0.9	0	0	interacts with	FN1 (interacts with) STAT3	0	9606.ENSP00000346839	9606.ENSP00000264657	0	FALSE	interacts with	FN1 (interacts with) STAT3
0.903	0.055	0.904	0	0	0	0	interacts with	FN1 (interacts with) ICAM1	0	9606.ENSP00000346839	9606.ENSP00000264832	0	FALSE	interacts with	FN1 (interacts with) ICAM1
0.916	0.138	0.944	0	0.292	0	0	interacts with	FN1 (interacts with) EGFR	0	9606.ENSP00000346839	9606.ENSP00000275493	0	FALSE	interacts with	FN1 (interacts with) EGFR
0.571	0.055	0.735	0.4	0	0	0	interacts with	FN1 (interacts with) IL13	0	9606.ENSP00000346839	9606.ENSP00000304915	0	FALSE	interacts with	FN1 (interacts with) IL13
0.846	0.047	0.846	0	0	0	0	interacts with	FN1 (interacts with) CXCL8	0	9606.ENSP00000346839	9606.ENSP00000306512	0	FALSE	interacts with	FN1 (interacts with) CXCL8
0.777	0.109	0.792	0	0	0	0	interacts with	FN1 (interacts with) MMP1	0	9606.ENSP00000346839	9606.ENSP00000322788	0	FALSE	interacts with	FN1 (interacts with) MMP1
0.722	0.062	0.73	0	0.045	0	0	interacts with	FN1 (interacts with) SMAD3	0	9606.ENSP00000346839	9606.ENSP00000332973	0	FALSE	interacts with	FN1 (interacts with) SMAD3
0.697	0.055	0.701	0	0	0	0	interacts with	FN1 (interacts with) INS	0	9606.ENSP00000346839	9606.ENSP00000380432	0	FALSE	interacts with	FN1 (interacts with) INS
0.7	0.055	0.705	0	0	0	0	interacts with	FN1 (interacts with) ELANE	0	9606.ENSP00000346839	9606.ENSP00000466090	0	FALSE	interacts with	FN1 (interacts with) ELANE
0.705	0.05	0.707	0	0	0	0	interacts with	FN1 (interacts with) MMP12	0	9606.ENSP00000346839	9606.ENSP00000458585	0	FALSE	interacts with	FN1 (interacts with) MMP12
0.752	0	0.752	0	0	0	0	interacts with	FN1 (interacts with) IL10	0	9606.ENSP00000346839	9606.ENSP00000412237	0	FALSE	interacts with	FN1 (interacts with) IL10
0.753	0	0.753	0	0	0	0	interacts with	FN1 (interacts with) CD8A	0	9606.ENSP00000346839	9606.ENSP00000386559	0	FALSE	interacts with	FN1 (interacts with) CD8A
0.785	0	0.785	0	0	0	0	interacts with	FN1 (interacts with) BCL2	0	9606.ENSP00000346839	9606.ENSP00000381185	0	FALSE	interacts with	FN1 (interacts with) BCL2
0.795	0.105	0.809	0	0.045	0	0	interacts with	FN1 (interacts with) VIM	0	9606.ENSP00000346839	9606.ENSP00000446007	0	FALSE	interacts with	FN1 (interacts with) VIM
0.816	0.109	0.829	0	0	0	0	interacts with	FN1 (interacts with) TGFB2	0	9606.ENSP00000346839	9606.ENSP00000355896	0	FALSE	interacts with	FN1 (interacts with) TGFB2
0.815	0.163	0.838	0	0	0	0	interacts with	FN1 (interacts with) COL18A1	0	9606.ENSP00000346839	9606.ENSP00000352798	0	FALSE	interacts with	FN1 (interacts with) COL18A1
0.84	0.055	0.842	0	0	0	0	interacts with	FN1 (interacts with) PTPRC	0	9606.ENSP00000346839	9606.ENSP00000411355	0	FALSE	interacts with	FN1 (interacts with) PTPRC
0.844	0.055	0.846	0	0	0	0	interacts with	FN1 (interacts with) AKT1	0	9606.ENSP00000346839	9606.ENSP00000451828	0	FALSE	interacts with	FN1 (interacts with) AKT1
0.843	0.076	0.85	0	0.049	0	0	interacts with	FN1 (interacts with) CTNNB1	0	9606.ENSP00000346839	9606.ENSP00000495360	0	FALSE	interacts with	FN1 (interacts with) CTNNB1
0.774	0.048	0.85	0	0.359	0	0.601	interacts with	FN1 (interacts with) MMP9	0	9606.ENSP00000346839	9606.ENSP00000361405	0	FALSE	interacts with	FN1 (interacts with) MMP9
0.595	0.047	0.853	0.65	0	0	0	interacts with	FN1 (interacts with) ITGAM	0	9606.ENSP00000346839	9606.ENSP00000496959	0	FALSE	interacts with	FN1 (interacts with) ITGAM
0.631	0.044	0.865	0.65	0	0	0	interacts with	FN1 (interacts with) ITGAX	0	9606.ENSP00000346839	9606.ENSP00000454623	0	FALSE	interacts with	FN1 (interacts with) ITGAX
0.831	0.112	0.884	0	0.292	0	0	interacts with	FN1 (interacts with) CXCL12	0	9606.ENSP00000346839	9606.ENSP00000379140	0	FALSE	interacts with	FN1 (interacts with) CXCL12
0.895	0.087	0.9	0	0	0	0	interacts with	FN1 (interacts with) IL6	0	9606.ENSP00000346839	9606.ENSP00000385675	0	FALSE	interacts with	FN1 (interacts with) IL6
0.901	0.107	0.907	0	0	0	0	interacts with	FN1 (interacts with) IGF1	0	9606.ENSP00000346839	9606.ENSP00000376637	0	FALSE	interacts with	FN1 (interacts with) IGF1
0.781	0	0.909	0	0.601	0	0	interacts with	FN1 (interacts with) FASLG	0	9606.ENSP00000346839	9606.ENSP00000356694	0	FALSE	interacts with	FN1 (interacts with) FASLG
0.943	0.06	0.945	0	0.072	0	0	interacts with	FN1 (interacts with) GAPDH	0	9606.ENSP00000346839	9606.ENSP00000380070	0	FALSE	interacts with	FN1 (interacts with) GAPDH
0.939	0.216	0.963	0	0.292	0	0	interacts with	FN1 (interacts with) CCN2	0	9606.ENSP00000346839	9606.ENSP00000356954	0	FALSE	interacts with	FN1 (interacts with) CCN2
0.97	0.057	0.97	0	0	0	0	interacts with	FN1 (interacts with) TNF	0	9606.ENSP00000346839	9606.ENSP00000398698	0	FALSE	interacts with	FN1 (interacts with) TNF
0.995	0.049	0.995	0	0	0	0	interacts with	FN1 (interacts with) TLR4	0	9606.ENSP00000346839	9606.ENSP00000363089	0	FALSE	interacts with	FN1 (interacts with) TLR4
0.996	0.098	0.996	0	0	0	0	interacts with	FN1 (interacts with) SPP1	0	9606.ENSP00000346839	9606.ENSP00000378517	0	FALSE	interacts with	FN1 (interacts with) SPP1
0.979	0.072	0.979	0	0.047	0	0	interacts with	FOXP3 (interacts with) CD4	0	9606.ENSP00000365380	9606.ENSP00000011653	0	FALSE	interacts with	FOXP3 (interacts with) CD4
0.749	0.06	0.753	0	0	0	0	interacts with	FOXP3 (interacts with) CCL17	0	9606.ENSP00000365380	9606.ENSP00000219244	0	FALSE	interacts with	FOXP3 (interacts with) CCL17
0.855	0.06	0.865	0	0.095	0	0	interacts with	FOXP3 (interacts with) TGFB1	0	9606.ENSP00000365380	9606.ENSP00000221930	0	FALSE	interacts with	FOXP3 (interacts with) TGFB1
0.71	0	0.744	0	0.154	0	0	interacts with	FOXP3 (interacts with) NFKB1	0	9606.ENSP00000365380	9606.ENSP00000226574	0	FALSE	interacts with	FOXP3 (interacts with) NFKB1
0.946	0.121	0.991	0.5	0.695	0	0	interacts with	FOXP3 (interacts with) IL2	0	9606.ENSP00000365380	9606.ENSP00000226730	0	FALSE	interacts with	FOXP3 (interacts with) IL2
0.95	0.114	0.982	0.5	0.301	0	0	interacts with	FOXP3 (interacts with) IFNG	0	9606.ENSP00000365380	9606.ENSP00000229135	0	FALSE	interacts with	FOXP3 (interacts with) IFNG
0.923	0.072	0.925	0	0	0	0	interacts with	FOXP3 (interacts with) IL4	0	9606.ENSP00000365380	9606.ENSP00000231449	0	FALSE	interacts with	FOXP3 (interacts with) IL4
0.777	0.166	0.806	0	0	0	0	interacts with	FOXP3 (interacts with) IL5	0	9606.ENSP00000365380	9606.ENSP00000231454	0	FALSE	interacts with	FOXP3 (interacts with) IL5
0.85	0	0.85	0	0	0	0	interacts with	FOXP3 (interacts with) CD68	0	9606.ENSP00000365380	9606.ENSP00000250092	0	FALSE	interacts with	FOXP3 (interacts with) CD68
0.843	0	0.843	0	0	0	0	interacts with	FOXP3 (interacts with) IL1B	0	9606.ENSP00000365380	9606.ENSP00000263341	0	FALSE	interacts with	FOXP3 (interacts with) IL1B
0.965	0	0.984	0	0.567	0	0	interacts with	FOXP3 (interacts with) STAT3	0	9606.ENSP00000365380	9606.ENSP00000264657	0	FALSE	interacts with	FOXP3 (interacts with) STAT3
0.865	0.051	0.873	0	0.095	0	0	interacts with	FOXP3 (interacts with) PPARG	0	9606.ENSP00000365380	9606.ENSP00000287820	0	FALSE	interacts with	FOXP3 (interacts with) PPARG
0.739	0.054	0.743	0	0	0	0	interacts with	FOXP3 (interacts with) CSF2	0	9606.ENSP00000365380	9606.ENSP00000296871	0	FALSE	interacts with	FOXP3 (interacts with) CSF2
0.786	0.138	0.808	0	0	0	0	interacts with	FOXP3 (interacts with) IL13	0	9606.ENSP00000365380	9606.ENSP00000304915	0	FALSE	interacts with	FOXP3 (interacts with) IL13
0.581	0.082	0.805	0	0.534	0	0	interacts with	FOXP3 (interacts with) SMAD3	0	9606.ENSP00000365380	9606.ENSP00000332973	0	FALSE	interacts with	FOXP3 (interacts with) SMAD3
0.789	0	0.79	0	0.047	0	0	interacts with	FOXP3 (interacts with) CD163	0	9606.ENSP00000365380	9606.ENSP00000352071	0	FALSE	interacts with	FOXP3 (interacts with) CD163
0.721	0.049	0.729	0	0.061	0	0	interacts with	FOXP3 (interacts with) BCL2	0	9606.ENSP00000365380	9606.ENSP00000381185	0	FALSE	interacts with	FOXP3 (interacts with) BCL2
0.851	0.068	0.855	0	0	0	0	interacts with	FOXP3 (interacts with) ITGAM	0	9606.ENSP00000365380	9606.ENSP00000496959	0	FALSE	interacts with	FOXP3 (interacts with) ITGAM
0.873	0.054	0.875	0	0	0	0	interacts with	FOXP3 (interacts with) ITGAX	0	9606.ENSP00000365380	9606.ENSP00000454623	0	FALSE	interacts with	FOXP3 (interacts with) ITGAX
0.876	0.062	0.879	0	0.051	0	0	interacts with	FOXP3 (interacts with) PTPRC	0	9606.ENSP00000365380	9606.ENSP00000411355	0	FALSE	interacts with	FOXP3 (interacts with) PTPRC
0.878	0	0.909	0	0.292	0	0	interacts with	FOXP3 (interacts with) TNF	0	9606.ENSP00000365380	9606.ENSP00000398698	0	FALSE	interacts with	FOXP3 (interacts with) TNF
0.908	0	0.913	0	0.095	0	0	interacts with	FOXP3 (interacts with) IL6	0	9606.ENSP00000365380	9606.ENSP00000385675	0	FALSE	interacts with	FOXP3 (interacts with) IL6
0.946	0.094	0.948	0	0	0	0	interacts with	FOXP3 (interacts with) CD8A	0	9606.ENSP00000365380	9606.ENSP00000386559	0	FALSE	interacts with	FOXP3 (interacts with) CD8A
0.948	0.125	0.953	0	0	0	0	interacts with	FOXP3 (interacts with) IL17A	0	9606.ENSP00000365380	9606.ENSP00000497968	0	FALSE	interacts with	FOXP3 (interacts with) IL17A
0.952	0.105	0.955	0	0	0	0	interacts with	FOXP3 (interacts with) IL10	0	9606.ENSP00000365380	9606.ENSP00000412237	0	FALSE	interacts with	FOXP3 (interacts with) IL10
0.988	0	0.988	0	0	0	0	interacts with	FOXP3 (interacts with) HIF1A	0	9606.ENSP00000365380	9606.ENSP00000437955	0	FALSE	interacts with	FOXP3 (interacts with) HIF1A
0.734	0	0.759	0	0.131	0	0	interacts with	GAPDH (interacts with) CD4	0	9606.ENSP00000380070	9606.ENSP00000011653	0	FALSE	interacts with	GAPDH (interacts with) CD4
0.633	0.067	0.701	0	0.196	0	0	interacts with	GAPDH (interacts with) MAPK1	0	9606.ENSP00000380070	9606.ENSP00000215832	0	FALSE	interacts with	GAPDH (interacts with) MAPK1
0.718	0	0.718	0	0	0	0	interacts with	GAPDH (interacts with) MMP2	0	9606.ENSP00000380070	9606.ENSP00000219070	0	FALSE	interacts with	GAPDH (interacts with) MMP2
0.811	0.043	0.811	0	0	0	0	interacts with	GAPDH (interacts with) TGFB1	0	9606.ENSP00000380070	9606.ENSP00000221930	0	FALSE	interacts with	GAPDH (interacts with) TGFB1
0.739	0.06	0.745	0	0	0	0	interacts with	GAPDH (interacts with) SERPINE1	0	9606.ENSP00000380070	9606.ENSP00000223095	0	FALSE	interacts with	GAPDH (interacts with) SERPINE1
0.729	0	0.729	0	0	0	0	interacts with	GAPDH (interacts with) CCL2	0	9606.ENSP00000380070	9606.ENSP00000225831	0	FALSE	interacts with	GAPDH (interacts with) CCL2
0.739	0.043	0.74	0	0	0	0	interacts with	GAPDH (interacts with) COL1A1	0	9606.ENSP00000380070	9606.ENSP00000225964	0	FALSE	interacts with	GAPDH (interacts with) COL1A1
0.721	0.107	0.783	0	0.201	0	0	interacts with	GAPDH (interacts with) NFKB1	0	9606.ENSP00000380070	9606.ENSP00000226574	0	FALSE	interacts with	GAPDH (interacts with) NFKB1
0.794	0.086	0.813	0	0.049	0	0	interacts with	GAPDH (interacts with) IL2		9606.ENSP00000380070	9606.ENSP00000226730	0	FALSE	interacts with	GAPDH (interacts with) IL2
0.794	0	0.794	0	0	0	0	interacts with	GAPDH (interacts with) IFNG	0	9606.ENSP00000380070	9606.ENSP00000229135	0	FALSE	interacts with	GAPDH (interacts with) IFNG
0.713	0	0.713	0	0	0	0	interacts with	GAPDH (interacts with) IL4	0	9606.ENSP00000380070	9606.ENSP00000231449	0	FALSE	interacts with	GAPDH (interacts with) IL4
0.859	0.074	0.863	0	0	0	0	interacts with	GAPDH (interacts with) CD68	0	9606.ENSP00000380070	9606.ENSP00000250092	0	FALSE	interacts with	GAPDH (interacts with) CD68
0.851	0	0.855	0	0.071	0	0	interacts with	GAPDH (interacts with) CDH1	0	9606.ENSP00000380070	9606.ENSP00000261769	0	FALSE	interacts with	GAPDH (interacts with) CDH1
0.722	0.06	0.728	0	0	0	0	interacts with	GAPDH (interacts with) SMAD2	0	9606.ENSP00000380070	9606.ENSP00000262160	0	FALSE	interacts with	GAPDH (interacts with) SMAD2
0.872	0	0.872	0	0	0	0	interacts with	GAPDH (interacts with) IL1B	0	9606.ENSP00000380070	9606.ENSP00000263341	0	FALSE	interacts with	GAPDH (interacts with) IL1B
0.746	0	0.746	0	0	0	0	interacts with	GAPDH (interacts with) FGF2	0	9606.ENSP00000380070	9606.ENSP00000264498	0	FALSE	interacts with	GAPDH (interacts with) FGF2
0.801	0.067	0.807	0	0	0	0	interacts with	GAPDH (interacts with) STAT3	0	9606.ENSP00000380070	9606.ENSP00000264657	0	FALSE	interacts with	GAPDH (interacts with) STAT3
0.827	0.043	0.886	0	0.364	0	0	interacts with	GAPDH (interacts with) TP53	0	9606.ENSP00000380070	9606.ENSP00000269305	0	FALSE	interacts with	GAPDH (interacts with) TP53
0.803	0.06	0.955	0	0.779	0	0	interacts with	GAPDH (interacts with) EGFR	0	9606.ENSP00000380070	9606.ENSP00000275493	0	FALSE	interacts with	GAPDH (interacts with) EGFR
0.713	0	0.713	0	0	0	0	interacts with	GAPDH (interacts with) IFNA1	0	9606.ENSP00000380070	9606.ENSP00000276927	0	FALSE	interacts with	GAPDH (interacts with) IFNA1
0.74	0	0.742	0	0.045	0	0	interacts with	GAPDH (interacts with) PPARG	0	9606.ENSP00000380070	9606.ENSP00000287820	0	FALSE	interacts with	GAPDH (interacts with) PPARG
0.89	0.047	0.89	0	0	0	0	interacts with	GAPDH (interacts with) CASP3	0	9606.ENSP00000380070	9606.ENSP00000311032	0	FALSE	interacts with	GAPDH (interacts with) CASP3
0.743	0	0.743	0	0	0	0	interacts with	GAPDH (interacts with) CSF1	0	9606.ENSP00000380070	9606.ENSP00000327513	0	FALSE	interacts with	GAPDH (interacts with) CSF1
0.794	0.044	0.794	0	0	0	0	interacts with	GAPDH (interacts with) SMAD3	0	9606.ENSP00000380070	9606.ENSP00000332973	0	FALSE	interacts with	GAPDH (interacts with) SMAD3
0.691	0.169	0.74	0	0.068	0	0	interacts with	GAPDH (interacts with) HMGB1	0	9606.ENSP00000380070	9606.ENSP00000345347	0	FALSE	interacts with	GAPDH (interacts with) HMGB1
0.943	0.06	0.945	0	0.072	0	0	interacts with	GAPDH (interacts with) FN1	0	9606.ENSP00000380070	9606.ENSP00000346839	0	FALSE	interacts with	GAPDH (interacts with) FN1
0.701	0.042	0.701	0	0	0	0	interacts with	GAPDH (interacts with) MTOR	0	9606.ENSP00000380070	9606.ENSP00000354558	0	FALSE	interacts with	GAPDH (interacts with) MTOR
0.82	0	0.82	0	0	0	0	interacts with	GAPDH (interacts with) PTGS2	0	9606.ENSP00000380070	9606.ENSP00000356438	0	FALSE	interacts with	GAPDH (interacts with) PTGS2
0.812	0.05	0.814	0	0	0	0	interacts with	GAPDH (interacts with) MMP9	0	9606.ENSP00000380070	9606.ENSP00000361405	0	FALSE	interacts with	GAPDH (interacts with) MMP9
0.748	0	0.761	0	0.091	0	0	interacts with	GAPDH (interacts with) TLR4	0	9606.ENSP00000380070	9606.ENSP00000363089	0	FALSE	interacts with	GAPDH (interacts with) TLR4
0.711	0.058	0.716	0	0	0	0	interacts with	GAPDH (interacts with) SPP1	0	9606.ENSP00000380070	9606.ENSP00000378517	0	FALSE	interacts with	GAPDH (interacts with) SPP1
0.714	0.043	0.714	0	0	0	0	interacts with	GAPDH (interacts with) ITGAM	0	9606.ENSP00000380070	9606.ENSP00000496959	0	FALSE	interacts with	GAPDH (interacts with) ITGAM
0.728	0.042	0.728	0	0	0	0	interacts with	GAPDH (interacts with) PTPRC	0	9606.ENSP00000380070	9606.ENSP00000411355	0	FALSE	interacts with	GAPDH (interacts with) PTPRC
0.748	0.054	0.751	0	0	0	0	interacts with	GAPDH (interacts with) HIF1A	0	9606.ENSP00000380070	9606.ENSP00000437955	0	FALSE	interacts with	GAPDH (interacts with) HIF1A
0.752	0.106	0.769	0	0	0	0	interacts with	GAPDH (interacts with) VIM	0	9606.ENSP00000380070	9606.ENSP00000446007	0	FALSE	interacts with	GAPDH (interacts with) VIM
0.782	0	0.782	0	0	0	0	interacts with	GAPDH (interacts with) IL10	0	9606.ENSP00000380070	9606.ENSP00000412237	0	FALSE	interacts with	GAPDH (interacts with) IL10
0.816	0	0.816	0	0	0	0	interacts with	GAPDH (interacts with) INS	0	9606.ENSP00000380070	9606.ENSP00000380432	0	FALSE	interacts with	GAPDH (interacts with) INS
0.849	0	0.849	0	0	0	0	interacts with	GAPDH (interacts with) TNF	0	9606.ENSP00000380070	9606.ENSP00000398698	0	FALSE	interacts with	GAPDH (interacts with) TNF
0.876	0	0.876	0	0	0	0	interacts with	GAPDH (interacts with) BCL2	0	9606.ENSP00000380070	9606.ENSP00000381185	0	FALSE	interacts with	GAPDH (interacts with) BCL2
0.879	0	0.879	0	0	0	0	interacts with	GAPDH (interacts with) IL6	0	9606.ENSP00000380070	9606.ENSP00000385675	0	FALSE	interacts with	GAPDH (interacts with) IL6
0.828	0.053	0.897	0	0.409	0	0	interacts with	GAPDH (interacts with) CTNNB1		9606.ENSP00000380070	9606.ENSP00000495360	0	FALSE	interacts with	GAPDH (interacts with) CTNNB1
0.884	0.056	0.911	0	0.25	0	0	interacts with	GAPDH (interacts with) AKT1	0	9606.ENSP00000380070	9606.ENSP00000451828	0	FALSE	interacts with	GAPDH (interacts with) AKT1
0.623	0	0.731	0	0.314	0	0	interacts with	GLI2 (interacts with) SMAD3	0	9606.ENSP00000390436	9606.ENSP00000332973	0	FALSE	interacts with	GLI2 (interacts with) SMAD3
0.583	0.062	0.745	0.4	0	0	0	interacts with	HGF (interacts with) TIMP1	0	9606.ENSP00000222390	9606.ENSP00000218388	0	FALSE	interacts with	HGF (interacts with) TIMP1
0.593	0.097	0.76	0.4	0	0	0	interacts with	HGF (interacts with) MMP2	0	9606.ENSP00000222390	9606.ENSP00000219070	0	FALSE	interacts with	HGF (interacts with) MMP2
0.871	0.064	0.921	0.4	0	0	0	interacts with	HGF (interacts with) TGFB1	0	9606.ENSP00000222390	9606.ENSP00000221930	0	FALSE	interacts with	HGF (interacts with) TGFB1
0.701	0	0.701	0	0	0	0	interacts with	HGF (interacts with) TGFA	0	9606.ENSP00000222390	9606.ENSP00000404131	0	FALSE	interacts with	HGF (interacts with) TGFA
0.691	0.076	0.702	0	0	0	0	interacts with	HGF (interacts with) CXCL8	0	9606.ENSP00000222390	9606.ENSP00000306512	0	FALSE	interacts with	HGF (interacts with) CXCL8
0.694	0.08	0.706	0	0	0	0	interacts with	HGF (interacts with) PTPRC	0	9606.ENSP00000222390	9606.ENSP00000411355	0	FALSE	interacts with	HGF (interacts with) PTPRC
0.516	0.077	0.708	0.4	0	0	0	interacts with	HGF (interacts with) MMP1	0	9606.ENSP00000222390	9606.ENSP00000322788	0	FALSE	interacts with	HGF (interacts with) MMP1
0.716	0	0.716	0	0	0	0	interacts with	HGF (interacts with) IFNG	0	9606.ENSP00000222390	9606.ENSP00000229135	0	FALSE	interacts with	HGF (interacts with) IFNG
0.74	0	0.74	0	0	0	0	interacts with	HGF (interacts with) IL1A	0	9606.ENSP00000222390	9606.ENSP00000263339	0	FALSE	interacts with	HGF (interacts with) IL1A
0.743	0.072	0.751	0	0	0	0	interacts with	HGF (interacts with) CXCL12	0	9606.ENSP00000222390	9606.ENSP00000379140	0	FALSE	interacts with	HGF (interacts with) CXCL12
0.789	0	0.789	0	0	0	0	interacts with	HGF (interacts with) INS	0	9606.ENSP00000222390	9606.ENSP00000380432	0	FALSE	interacts with	HGF (interacts with) INS
0.674	0.055	0.799	0.4	0	0	0	interacts with	HGF (interacts with) MMP9	0	9606.ENSP00000222390	9606.ENSP00000361405	0	FALSE	interacts with	HGF (interacts with) MMP9
0.697	0.056	0.813	0.4	0	0	0	interacts with	HGF (interacts with) IL10	0	9606.ENSP00000222390	9606.ENSP00000412237	0	FALSE	interacts with	HGF (interacts with) IL10
0.673	0	0.829	0.5	0	0	0	interacts with	HGF (interacts with) STAT3	0	9606.ENSP00000222390	9606.ENSP00000264657	0	FALSE	interacts with	HGF (interacts with) STAT3
0.825	0.077	0.832	0	0.045	0	0	interacts with	HGF (interacts with) SERPINE1	0	9606.ENSP00000222390	9606.ENSP00000223095	0	FALSE	interacts with	HGF (interacts with) SERPINE1
0.773	0.059	0.86	0.4	0	0	0	interacts with	HGF (interacts with) IL6	0	9606.ENSP00000222390	9606.ENSP00000385675	0	FALSE	interacts with	HGF (interacts with) IL6
0.866	0.061	0.869	0	0	0	0	interacts with	HGF (interacts with) IGF1	0	9606.ENSP00000222390	9606.ENSP00000376637	0	FALSE	interacts with	HGF (interacts with) IGF1
0.761	0	0.882	0.5	0.096	0	0	interacts with	HGF (interacts with) AKT1	0	9606.ENSP00000222390	9606.ENSP00000451828	0	FALSE	interacts with	HGF (interacts with) AKT1
0.927	0.054	0.955	0.4	0	0	0	interacts with	HGF (interacts with) FGF2	0	9606.ENSP00000222390	9606.ENSP00000264498	0	FALSE	interacts with	HGF (interacts with) FGF2
0.947	0.055	0.967	0	0.394	0	0	interacts with	HGF (interacts with) FN1	0	9606.ENSP00000222390	9606.ENSP00000346839	0	FALSE	interacts with	HGF (interacts with) FN1
0.947	0	0.98	0.65	0	0	0	interacts with	HGF (interacts with) EGFR	0	9606.ENSP00000222390	9606.ENSP00000275493	0	FALSE	interacts with	HGF (interacts with) EGFR
0.648	0.049	0.985	0.9	0.626	0	0	interacts with	HIF1A (interacts with) MAPK1	0	9606.ENSP00000437955	9606.ENSP00000215832	0	FALSE	interacts with	HIF1A (interacts with) MAPK1
0.712	0.104	0.731	0	0	0	0	interacts with	HIF1A (interacts with) MMP2	0	9606.ENSP00000437955	9606.ENSP00000219070	0	FALSE	interacts with	HIF1A (interacts with) MMP2
0.799	0.044	0.838	0	0.225	0	0	interacts with	HIF1A (interacts with) TGFB1	0	9606.ENSP00000437955	9606.ENSP00000221930	0	FALSE	interacts with	HIF1A (interacts with) TGFB1
0.807	0.088	0.816	0	0	0	0	interacts with	HIF1A (interacts with) NFKB1	0	9606.ENSP00000437955	9606.ENSP00000226574	0	FALSE	interacts with	HIF1A (interacts with) NFKB1
0.721	0	0.721	0	0	0	0	interacts with	HIF1A (interacts with) CDH1	0	9606.ENSP00000437955	9606.ENSP00000261769	0	FALSE	interacts with	HIF1A (interacts with) CDH1
0.751	0.12	0.771	0	0	0	0	interacts with	HIF1A (interacts with) IL1B	0	9606.ENSP00000437955	9606.ENSP00000263341	0	FALSE	interacts with	HIF1A (interacts with) IL1B
0.724	0.049	0.727	0	0	0	0	interacts with	HIF1A (interacts with) FGF2	0	9606.ENSP00000437955	9606.ENSP00000264498	0	FALSE	interacts with	HIF1A (interacts with) FGF2
0.923	0.115	0.994	0.75	0.738	0	0	interacts with	HIF1A (interacts with) STAT3	0	9606.ENSP00000437955	9606.ENSP00000264657	0	FALSE	interacts with	HIF1A (interacts with) STAT3
0.994	0	0.999	0	0.847	0	0	interacts with	HIF1A (interacts with) TP53	0	9606.ENSP00000437955	9606.ENSP00000269305	0	FALSE	interacts with	HIF1A (interacts with) TP53
0.873	0.055	0.934	0.5	0	0	0	interacts with	HIF1A (interacts with) EGFR	0	9606.ENSP00000437955	9606.ENSP00000275493	0	FALSE	interacts with	HIF1A (interacts with) EGFR
0.845	0.067	0.854	0	0.071	0	0	interacts with	HIF1A (interacts with) PPARG	0	9606.ENSP00000437955	9606.ENSP00000287820	0	FALSE	interacts with	HIF1A (interacts with) PPARG
0.667	0.184	0.716	0	0	0	0	interacts with	HIF1A (interacts with) CXCL8	0	9606.ENSP00000437955	9606.ENSP00000306512	0	FALSE	interacts with	HIF1A (interacts with) CXCL8
0.752	0.094	0.766	0	0	0	0	interacts with	HIF1A (interacts with) CASP3	0	9606.ENSP00000437955	9606.ENSP00000311032	0	FALSE	interacts with	HIF1A (interacts with) CASP3
0.888	0.044	0.975	0	0.784	0	0	interacts with	HIF1A (interacts with) SMAD3	0	9606.ENSP00000437955	9606.ENSP00000332973	0	FALSE	interacts with	HIF1A (interacts with) SMAD3
0.782	0	0.789	0	0.069	0	0	interacts with	HIF1A (interacts with) MTOR	0	9606.ENSP00000437955	9606.ENSP00000354558	0	FALSE	interacts with	HIF1A (interacts with) MTOR
0.797	0.201	0.831	0	0	0	0	interacts with	HIF1A (interacts with) PTGS2	0	9606.ENSP00000437955	9606.ENSP00000356438	0	FALSE	interacts with	HIF1A (interacts with) PTGS2
0.743	0.062	0.748	0	0	0	0	interacts with	HIF1A (interacts with) CCN2	0	9606.ENSP00000437955	9606.ENSP00000356954	0	FALSE	interacts with	HIF1A (interacts with) CCN2
0.815	0.088	0.824	0	0	0	0	interacts with	HIF1A (interacts with) MMP9	0	9606.ENSP00000437955	9606.ENSP00000361405	0	FALSE	interacts with	HIF1A (interacts with) MMP9
0.988	0	0.988	0	0	0	0	interacts with	HIF1A (interacts with) FOXP3	0	9606.ENSP00000437955	9606.ENSP00000365380	0	FALSE	interacts with	HIF1A (interacts with) FOXP3
0.812	0.103	0.824	0	0	0	0	interacts with	HIF1A (interacts with) CXCL12	0	9606.ENSP00000437955	9606.ENSP00000379140	0	FALSE	interacts with	HIF1A (interacts with) CXCL12
0.748	0.054	0.751	0	0	0	0	interacts with	HIF1A (interacts with) GAPDH	0	9606.ENSP00000437955	9606.ENSP00000380070	0	FALSE	interacts with	HIF1A (interacts with) GAPDH
0.895	0	0.946	0	0.51	0	0	interacts with	HIF1A (interacts with) BCL2	0	9606.ENSP00000437955	9606.ENSP00000381185	0	FALSE	interacts with	HIF1A (interacts with) BCL2
0.777	0.139	0.8	0	0	0	0	interacts with	HIF1A (interacts with) IL6	0	9606.ENSP00000437955	9606.ENSP00000385675	0	FALSE	interacts with	HIF1A (interacts with) IL6
0.818	0.044	0.818	0	0	0	0	interacts with	HIF1A (interacts with) TNF	0	9606.ENSP00000437955	9606.ENSP00000398698	0	FALSE	interacts with	HIF1A (interacts with) TNF
0.749	0.048	0.751	0	0	0	0	interacts with	HIF1A (interacts with) IL10	0	9606.ENSP00000437955	9606.ENSP00000412237	0	FALSE	interacts with	HIF1A (interacts with) IL10
0.659	0.065	0.755	0	0.292	0	0	interacts with	HIF1A (interacts with) MUC1	0	9606.ENSP00000437955	9606.ENSP00000484824	0	FALSE	interacts with	HIF1A (interacts with) MUC1
0.916	0	0.932	0	0.229	0	0	interacts with	HIF1A (interacts with) AKT1	0	9606.ENSP00000437955	9606.ENSP00000451828	0	FALSE	interacts with	HIF1A (interacts with) AKT1
0.989	0.26	0.998	0	0.785	0	0	interacts with	HIF1A (interacts with) CTNNB1	0	9606.ENSP00000437955	9606.ENSP00000495360	0	FALSE	interacts with	HIF1A (interacts with) CTNNB1
0.456	0.093	0.792	0.5	0.258	0	0	interacts with	HMGB1 (interacts with) MAPK1	0	9606.ENSP00000345347	9606.ENSP00000215832	0	FALSE	interacts with	HMGB1 (interacts with) MAPK1
0.82	0.111	0.923	0.4	0.294	0	0	interacts with	HMGB1 (interacts with) NFKB1	0	9606.ENSP00000345347	9606.ENSP00000226574	0	FALSE	interacts with	HMGB1 (interacts with) NFKB1
0.782	0.086	0.792	0	0	0	0	interacts with	HMGB1 (interacts with) IFNG	0	9606.ENSP00000345347	9606.ENSP00000229135	0	FALSE	interacts with	HMGB1 (interacts with) IFNG
0.996	0.051	0.998	0.5	0.297	0	0	interacts with	HMGB1 (interacts with) TLR2	0	9606.ENSP00000345347	9606.ENSP00000260010	0	FALSE	interacts with	HMGB1 (interacts with) TLR2
0.898	0	0.898	0	0	0	0	interacts with	HMGB1 (interacts with) IL1A	0	9606.ENSP00000345347	9606.ENSP00000263339	0	FALSE	interacts with	HMGB1 (interacts with) IL1A
0.959	0	0.97	0	0.292	0	0	interacts with	HMGB1 (interacts with) IL1B	0	9606.ENSP00000345347	9606.ENSP00000263341	0	FALSE	interacts with	HMGB1 (interacts with) IL1B
0.876	0.089	0.997	0	0.976	0	0	interacts with	HMGB1 (interacts with) TP53	0	9606.ENSP00000345347	9606.ENSP00000269305	0	FALSE	interacts with	HMGB1 (interacts with) TP53
0.736	0.109	0.755	0	0	0	0	interacts with	HMGB1 (interacts with) CASP3	0	9606.ENSP00000345347	9606.ENSP00000311032	0	FALSE	interacts with	HMGB1 (interacts with) CASP3
0.692	0.083	0.705	0	0	0	0	interacts with	HMGB1 (interacts with) IL10	0	9606.ENSP00000345347	9606.ENSP00000412237	0	FALSE	interacts with	HMGB1 (interacts with) IL10
0.691	0.169	0.74	0	0.068	0	0	interacts with	HMGB1 (interacts with) GAPDH	0	9606.ENSP00000345347	9606.ENSP00000380070	0	FALSE	interacts with	HMGB1 (interacts with) GAPDH
0.742	0.083	0.753	0	0	0	0	interacts with	HMGB1 (interacts with) TNF	0	9606.ENSP00000345347	9606.ENSP00000398698	0	FALSE	interacts with	HMGB1 (interacts with) TNF
0.782	0.086	0.792	0	0	0	0	interacts with	HMGB1 (interacts with) IL6	0	9606.ENSP00000345347	9606.ENSP00000385675	0	FALSE	interacts with	HMGB1 (interacts with) IL6
0.868	0.044	0.869	0	0.045	0	0	interacts with	HMGB1 (interacts with) ELANE	0	9606.ENSP00000345347	9606.ENSP00000466090	0	FALSE	interacts with	HMGB1 (interacts with) ELANE
0.979	0.042	0.984	0	0.292	0	0	interacts with	HMGB1 (interacts with) CXCL12	0	9606.ENSP00000345347	9606.ENSP00000379140	0	FALSE	interacts with	HMGB1 (interacts with) CXCL12
0.998	0.078	0.999	0.5	0.445	0	0	interacts with	HMGB1 (interacts with) TLR4	0	9606.ENSP00000345347	9606.ENSP00000363089	0	FALSE	interacts with	HMGB1 (interacts with) TLR4
0.968	0.062	0.969	0	0	0	0	interacts with	ICAM1 (interacts with) CD4	0	9606.ENSP00000264832	9606.ENSP00000011653	0	FALSE	interacts with	ICAM1 (interacts with) CD4
0.81	0.115	0.825	0	0	0	0	interacts with	ICAM1 (interacts with) TIMP1	0	9606.ENSP00000264832	9606.ENSP00000218388	0	FALSE	interacts with	ICAM1 (interacts with) TIMP1
0.749	0.049	0.751	0	0	0	0	interacts with	ICAM1 (interacts with) MMP2	0	9606.ENSP00000264832	9606.ENSP00000219070	0	FALSE	interacts with	ICAM1 (interacts with) MMP2
0.695	0.151	0.73	0	0	0	0	interacts with	ICAM1 (interacts with) TGFB1	0	9606.ENSP00000264832	9606.ENSP00000221930	0	FALSE	interacts with	ICAM1 (interacts with) TGFB1
0.716	0.129	0.742	0	0	0	0	interacts with	ICAM1 (interacts with) SERPINE1	0	9606.ENSP00000264832	9606.ENSP00000223095	0	FALSE	interacts with	ICAM1 (interacts with) SERPINE1
0.719	0.086	0.776	0	0	0	0	interacts with	ICAM1 (interacts with) CSF3	0	9606.ENSP00000264832	9606.ENSP00000225474	0.201	FALSE	interacts with	ICAM1 (interacts with) CSF3
0.892	0.36	0.928	0	0	0	0	interacts with	ICAM1 (interacts with) CCL2	0	9606.ENSP00000264832	9606.ENSP00000225831	0	FALSE	interacts with	ICAM1 (interacts with) CCL2
0.881	0.22	0.903	0	0	0	0	interacts with	ICAM1 (interacts with) NFKB1	0	9606.ENSP00000264832	9606.ENSP00000226574	0	FALSE	interacts with	ICAM1 (interacts with) NFKB1
0.799	0.049	0.8	0	0	0	0	interacts with	ICAM1 (interacts with) IL2	0	9606.ENSP00000264832	9606.ENSP00000226730	0	FALSE	interacts with	ICAM1 (interacts with) IL2
0.885	0.061	0.902	0	0.164	0	0	interacts with	ICAM1 (interacts with) IFNG	0	9606.ENSP00000264832	9606.ENSP00000229135	0	FALSE	interacts with	ICAM1 (interacts with) IFNG
0.811	0	0.811	0	0	0	0	interacts with	ICAM1 (interacts with) IL4	0	9606.ENSP00000264832	9606.ENSP00000231449	0	FALSE	interacts with	ICAM1 (interacts with) IL4
0.789	0	0.789	0	0	0	0	interacts with	ICAM1 (interacts with) CRP	0	9606.ENSP00000264832	9606.ENSP00000255030	0	FALSE	interacts with	ICAM1 (interacts with) CRP
0.667	0.175	0.714	0	0	0	0	interacts with	ICAM1 (interacts with) TLR2	0	9606.ENSP00000264832	9606.ENSP00000260010	0	FALSE	interacts with	ICAM1 (interacts with) TLR2
0.781	0.155	0.807	0	0	0	0	interacts with	ICAM1 (interacts with) IL1A	0	9606.ENSP00000264832	9606.ENSP00000263339	0	FALSE	interacts with	ICAM1 (interacts with) IL1A
0.885	0.271	0.912	0	0	0	0	interacts with	ICAM1 (interacts with) IL1B	0	9606.ENSP00000264832	9606.ENSP00000263341	0	FALSE	interacts with	ICAM1 (interacts with) IL1B
0.741	0.081	0.752	0	0	0	0	interacts with	ICAM1 (interacts with) FGF2	0	9606.ENSP00000264832	9606.ENSP00000264498	0	FALSE	interacts with	ICAM1 (interacts with) FGF2
0.649	0.122	0.832	0.5	0	0	0	interacts with	ICAM1 (interacts with) STAT3	0	9606.ENSP00000264832	9606.ENSP00000264657	0	FALSE	interacts with	ICAM1 (interacts with) STAT3
0.693	0.074	0.704	0	0	0	0	interacts with	ICAM1 (interacts with) AKT1	0	9606.ENSP00000264832	9606.ENSP00000451828	0	FALSE	interacts with	ICAM1 (interacts with) AKT1
0.704	0.058	0.709	0	0	0	0	interacts with	ICAM1 (interacts with) CX3CR1	0	9606.ENSP00000264832	9606.ENSP00000351059	0	FALSE	interacts with	ICAM1 (interacts with) CX3CR1
0.707	0.084	0.72	0	0	0	0	interacts with	ICAM1 (interacts with) MMP1	0	9606.ENSP00000264832	9606.ENSP00000322788	0	FALSE	interacts with	ICAM1 (interacts with) MMP1
0.722	0	0.722	0	0	0	0	interacts with	ICAM1 (interacts with) TP53	0	9606.ENSP00000264832	9606.ENSP00000269305	0	FALSE	interacts with	ICAM1 (interacts with) TP53
0.723	0	0.723	0	0	0	0	interacts with	ICAM1 (interacts with) IFNA1	0	9606.ENSP00000264832	9606.ENSP00000276927	0	FALSE	interacts with	ICAM1 (interacts with) IFNA1
0.695	0.184	0.74	0	0	0	0	interacts with	ICAM1 (interacts with) CCL3	0	9606.ENSP00000264832	9606.ENSP00000477908	0	FALSE	interacts with	ICAM1 (interacts with) CCL3
0.722	0.11	0.742	0	0	0	0	interacts with	ICAM1 (interacts with) CSF2	0	9606.ENSP00000264832	9606.ENSP00000296871	0	FALSE	interacts with	ICAM1 (interacts with) CSF2
0.725	0.174	0.763	0	0	0	0	interacts with	ICAM1 (interacts with) CCL4	0	9606.ENSP00000264832	9606.ENSP00000482259	0	FALSE	interacts with	ICAM1 (interacts with) CCL4
0.741	0.14	0.768	0	0	0	0	interacts with	ICAM1 (interacts with) TLR4	0	9606.ENSP00000264832	9606.ENSP00000363089	0	FALSE	interacts with	ICAM1 (interacts with) TLR4
0.764	0.059	0.768	0	0	0	0	interacts with	ICAM1 (interacts with) IL13	0	9606.ENSP00000264832	9606.ENSP00000304915	0	FALSE	interacts with	ICAM1 (interacts with) IL13
0.766	0.088	0.777	0	0	0	0	interacts with	ICAM1 (interacts with) FASLG	0	9606.ENSP00000264832	9606.ENSP00000356694	0	FALSE	interacts with	ICAM1 (interacts with) FASLG
0.779	0.094	0.791	0	0	0	0	interacts with	ICAM1 (interacts with) MMP9	0	9606.ENSP00000264832	9606.ENSP00000361405	0	FALSE	interacts with	ICAM1 (interacts with) MMP9
0.779	0.129	0.799	0	0	0	0	interacts with	ICAM1 (interacts with) EDN1	0	9606.ENSP00000264832	9606.ENSP00000368683	0	FALSE	interacts with	ICAM1 (interacts with) EDN1
0.784	0.133	0.805	0	0	0	0	interacts with	ICAM1 (interacts with) CCL5	0	9606.ENSP00000264832	9606.ENSP00000474412	0	FALSE	interacts with	ICAM1 (interacts with) CCL5
0.809	0.106	0.822	0	0	0	0	interacts with	ICAM1 (interacts with) CCR2	0	9606.ENSP00000264832	9606.ENSP00000292301	0	FALSE	interacts with	ICAM1 (interacts with) CCR2
0.813	0.119	0.828	0	0	0	0	interacts with	ICAM1 (interacts with) PTPRC	0	9606.ENSP00000264832	9606.ENSP00000411355	0	FALSE	interacts with	ICAM1 (interacts with) PTPRC
0.571	0.389	0.829	0.4	0	0	0	interacts with	ICAM1 (interacts with) CSF1	0	9606.ENSP00000264832	9606.ENSP00000327513	0	FALSE	interacts with	ICAM1 (interacts with) CSF1
0.814	0.151	0.835	0	0	0	0	interacts with	ICAM1 (interacts with) PTGS2	0	9606.ENSP00000264832	9606.ENSP00000356438	0	FALSE	interacts with	ICAM1 (interacts with) PTGS2
0.842	0.044	0.842	0	0	0	0	interacts with	ICAM1 (interacts with) CD8A	0	9606.ENSP00000264832	9606.ENSP00000386559	0	FALSE	interacts with	ICAM1 (interacts with) CD8A
0.817	0.257	0.858	0	0	0	0	interacts with	ICAM1 (interacts with) CXCL10	0	9606.ENSP00000264832	9606.ENSP00000305651	0	FALSE	interacts with	ICAM1 (interacts with) CXCL10
0.794	0.056	0.873	0.4	0	0	0	interacts with	ICAM1 (interacts with) IL10	0	9606.ENSP00000264832	9606.ENSP00000412237	0	FALSE	interacts with	ICAM1 (interacts with) IL10
0.864	0.042	0.877	0	0.135	0	0	interacts with	ICAM1 (interacts with) EGFR	0	9606.ENSP00000264832	9606.ENSP00000275493	0	FALSE	interacts with	ICAM1 (interacts with) EGFR
0.903	0.055	0.904	0	0	0	0	interacts with	ICAM1 (interacts with) FN1	0	9606.ENSP00000264832	9606.ENSP00000346839	0	FALSE	interacts with	ICAM1 (interacts with) FN1
0.927	0.259	0.943	0	0	0	0	interacts with	ICAM1 (interacts with) CXCL8	0	9606.ENSP00000264832	9606.ENSP00000306512	0	FALSE	interacts with	ICAM1 (interacts with) CXCL8
0.929	0.255	0.944	0	0	0	0	interacts with	ICAM1 (interacts with) TNF	0	9606.ENSP00000264832	9606.ENSP00000398698	0	FALSE	interacts with	ICAM1 (interacts with) TNF
0.931	0.27	0.947	0	0	0	0	interacts with	ICAM1 (interacts with) IL6	0	9606.ENSP00000264832	9606.ENSP00000385675	0	FALSE	interacts with	ICAM1 (interacts with) IL6
0.979	0.152	0.982	0	0	0	0	interacts with	ICAM1 (interacts with) ITGAX	0	9606.ENSP00000264832	9606.ENSP00000454623	0	FALSE	interacts with	ICAM1 (interacts with) ITGAX
0.988	0.117	0.993	0.4	0	0	0	interacts with	ICAM1 (interacts with) MUC1	0	9606.ENSP00000264832	9606.ENSP00000484824	0	FALSE	interacts with	ICAM1 (interacts with) MUC1
0.996	0.133	0.999	0.9	0.292	0	0	interacts with	ICAM1 (interacts with) ITGAM	0	9606.ENSP00000264832	9606.ENSP00000496959	0	FALSE	interacts with	ICAM1 (interacts with) ITGAM
0.577	0.138	0.803	0.5	0.045	0	0	interacts with	IFIH1 (interacts with) NFKB1	0	9606.ENSP00000497271	9606.ENSP00000226574	0	FALSE	interacts with	IFIH1 (interacts with) NFKB1
0.882	0.073	0.886	0	0	0	0	interacts with	IFIH1 (interacts with) IFNA1	0	9606.ENSP00000497271	9606.ENSP00000276927	0	FALSE	interacts with	IFIH1 (interacts with) IFNA1
0.783	0.521	0.891	0	0	0	0	interacts with	IFIH1 (interacts with) CXCL10	0	9606.ENSP00000497271	9606.ENSP00000305651	0	FALSE	interacts with	IFIH1 (interacts with) CXCL10
0.792	0.128	0.811	0	0	0	0	interacts with	IFIH1 (interacts with) TLR4	0	9606.ENSP00000497271	9606.ENSP00000363089	0	FALSE	interacts with	IFIH1 (interacts with) TLR4
0.732	0.159	0.765	0	0	0	0	interacts with	IFIH1 (interacts with) CCL5	0	9606.ENSP00000497271	9606.ENSP00000474412	0	FALSE	interacts with	IFIH1 (interacts with) CCL5
0.887	0	0.887	0	0	0	0	interacts with	IFNA1 (interacts with) CD4	0	9606.ENSP00000276927	9606.ENSP00000011653	0	FALSE	interacts with	IFNA1 (interacts with) CD4
0.766	0.044	0.766	0	0	0	0	interacts with	IFNA1 (interacts with) CCL2	0	9606.ENSP00000276927	9606.ENSP00000225831	0	FALSE	interacts with	IFNA1 (interacts with) CCL2
0.73	0	0.901	0.65	0	0	0	interacts with	IFNA1 (interacts with) NFKB1	0	9606.ENSP00000276927	9606.ENSP00000226574	0	FALSE	interacts with	IFNA1 (interacts with) NFKB1
0.876	0.083	0.881	0	0	0	0	interacts with	IFNA1 (interacts with) IL2	0	9606.ENSP00000276927	9606.ENSP00000226730	0	FALSE	interacts with	IFNA1 (interacts with) IL2
0.95	0.115	0.954	0	0	0	0	interacts with	IFNA1 (interacts with) IFNG	0	9606.ENSP00000276927	9606.ENSP00000229135	0	FALSE	interacts with	IFNA1 (interacts with) IFNG
0.791	0.058	0.794	0	0	0	0	interacts with	IFNA1 (interacts with) IL4	0	9606.ENSP00000276927	9606.ENSP00000231449	0	FALSE	interacts with	IFNA1 (interacts with) IL4
0.712	0.055	0.716	0	0	0	0	interacts with	IFNA1 (interacts with) IL5	0	9606.ENSP00000276927	9606.ENSP00000231454	0	FALSE	interacts with	IFNA1 (interacts with) IL5
0.792	0	0.792	0	0	0	0	interacts with	IFNA1 (interacts with) TLR2	0	9606.ENSP00000276927	9606.ENSP00000260010	0	FALSE	interacts with	IFNA1 (interacts with) TLR2
0.772	0.058	0.776	0	0	0	0	interacts with	IFNA1 (interacts with) IL1A	0	9606.ENSP00000276927	9606.ENSP00000263339	0	FALSE	interacts with	IFNA1 (interacts with) IL1A
0.847	0.055	0.849	0	0	0	0	interacts with	IFNA1 (interacts with) IL1B	0	9606.ENSP00000276927	9606.ENSP00000263341	0	FALSE	interacts with	IFNA1 (interacts with) IL1B
0.723	0	0.723	0	0	0	0	interacts with	IFNA1 (interacts with) ICAM1	0	9606.ENSP00000276927	9606.ENSP00000264832	0	FALSE	interacts with	IFNA1 (interacts with) ICAM1
0.505	0	0.819	0.65	0	0	0	interacts with	IFNA1 (interacts with) EGFR	0	9606.ENSP00000276927	9606.ENSP00000275493	0	FALSE	interacts with	IFNA1 (interacts with) EGFR
0.702	0.055	0.706	0	0	0	0	interacts with	IFNA1 (interacts with) ITGAX	0	9606.ENSP00000276927	9606.ENSP00000454623	0	FALSE	interacts with	IFNA1 (interacts with) ITGAX
0.713	0	0.713	0	0	0	0	interacts with	IFNA1 (interacts with) GAPDH	0	9606.ENSP00000276927	9606.ENSP00000380070	0	FALSE	interacts with	IFNA1 (interacts with) GAPDH
0.713	0	0.713	0	0	0	0	interacts with	IFNA1 (interacts with) IL13	0	9606.ENSP00000276927	9606.ENSP00000304915	0	FALSE	interacts with	IFNA1 (interacts with) IL13
0.717	0.056	0.721	0	0	0	0	interacts with	IFNA1 (interacts with) CCL4	0	9606.ENSP00000276927	9606.ENSP00000482259	0	FALSE	interacts with	IFNA1 (interacts with) CCL4
0.72	0.068	0.727	0	0	0	0	interacts with	IFNA1 (interacts with) CCL3	0	9606.ENSP00000276927	9606.ENSP00000477908	0	FALSE	interacts with	IFNA1 (interacts with) CCL3
0.72	0.068	0.728	0	0	0	0	interacts with	IFNA1 (interacts with) CXCL9	0	9606.ENSP00000276927	9606.ENSP00000354901	0	FALSE	interacts with	IFNA1 (interacts with) CXCL9
0.761	0.076	0.769	0	0	0	0	interacts with	IFNA1 (interacts with) CCL5	0	9606.ENSP00000276927	9606.ENSP00000474412	0	FALSE	interacts with	IFNA1 (interacts with) CCL5
0.774	0.055	0.777	0	0	0	0	interacts with	IFNA1 (interacts with) CXCL8	0	9606.ENSP00000276927	9606.ENSP00000306512	0	FALSE	interacts with	IFNA1 (interacts with) CXCL8
0.768	0.135	0.79	0	0	0	0	interacts with	IFNA1 (interacts with) IL17A	0	9606.ENSP00000276927	9606.ENSP00000497968	0	FALSE	interacts with	IFNA1 (interacts with) IL17A
0.807	0	0.807	0	0	0	0	interacts with	IFNA1 (interacts with) TLR4	0	9606.ENSP00000276927	9606.ENSP00000363089	0	FALSE	interacts with	IFNA1 (interacts with) TLR4
0.818	0.081	0.825	0	0	0	0	interacts with	IFNA1 (interacts with) CXCL10	0	9606.ENSP00000276927	9606.ENSP00000305651	0	FALSE	interacts with	IFNA1 (interacts with) CXCL10
0.849	0	0.849	0	0	0	0	interacts with	IFNA1 (interacts with) IL18	0	9606.ENSP00000276927	9606.ENSP00000280357	0	FALSE	interacts with	IFNA1 (interacts with) IL18
0.85	0.048	0.851	0	0	0	0	interacts with	IFNA1 (interacts with) CSF2	0	9606.ENSP00000276927	9606.ENSP00000296871	0	FALSE	interacts with	IFNA1 (interacts with) CSF2
0.843	0.101	0.852	0	0	0	0	interacts with	IFNA1 (interacts with) IL10	0	9606.ENSP00000276927	9606.ENSP00000412237	0	FALSE	interacts with	IFNA1 (interacts with) IL10
0.882	0.073	0.886	0	0	0	0	interacts with	IFNA1 (interacts with) IFIH1	0	9606.ENSP00000276927	9606.ENSP00000497271	0	FALSE	interacts with	IFNA1 (interacts with) IFIH1
0.89	0	0.89	0	0	0	0	interacts with	IFNA1 (interacts with) CD8A	0	9606.ENSP00000276927	9606.ENSP00000386559	0	FALSE	interacts with	IFNA1 (interacts with) CD8A
0.923	0.092	0.927	0	0	0	0	interacts with	IFNA1 (interacts with) IL6	0	9606.ENSP00000276927	9606.ENSP00000385675	0	FALSE	interacts with	IFNA1 (interacts with) IL6
0.923	0.107	0.928	0	0	0	0	interacts with	IFNA1 (interacts with) TNF	0	9606.ENSP00000276927	9606.ENSP00000398698	0	FALSE	interacts with	IFNA1 (interacts with) TNF
0.991	0.094	0.991	0	0	0	0	interacts with	IFNG (interacts with) CD4	0	9606.ENSP00000229135	9606.ENSP00000011653	0	FALSE	interacts with	IFNG (interacts with) CD4
0.736	0.13	0.76	0	0	0	0	interacts with	IFNG (interacts with) TIMP1	0	9606.ENSP00000229135	9606.ENSP00000218388	0	FALSE	interacts with	IFNG (interacts with) TIMP1
0.72	0.192	0.764	0	0	0	0	interacts with	IFNG (interacts with) CCL17	0	9606.ENSP00000229135	9606.ENSP00000219244	0	FALSE	interacts with	IFNG (interacts with) CCL17
0.886	0.055	0.888	0	0	0	0	interacts with	IFNG (interacts with) TGFB1	0	9606.ENSP00000229135	9606.ENSP00000221930	0	FALSE	interacts with	IFNG (interacts with) TGFB1
0.716	0	0.716	0	0	0	0	interacts with	IFNG (interacts with) HGF	0	9606.ENSP00000229135	9606.ENSP00000222390	0	FALSE	interacts with	IFNG (interacts with) HGF
0.72	0	0.72	0	0	0	0	interacts with	IFNG (interacts with) SERPINE1	0	9606.ENSP00000229135	9606.ENSP00000223095	0	FALSE	interacts with	IFNG (interacts with) SERPINE1
0.988	0.098	0.989	0	0	0	0	interacts with	IFNG (interacts with) CSF3	0	9606.ENSP00000229135	9606.ENSP00000225474	0	FALSE	interacts with	IFNG (interacts with) CSF3
0.926	0.195	0.938	0	0	0	0	interacts with	IFNG (interacts with) CCL2	0	9606.ENSP00000229135	9606.ENSP00000225831	0	FALSE	interacts with	IFNG (interacts with) CCL2
0.929	0.09	0.932	0	0	0	0	interacts with	IFNG (interacts with) NFKB1	0	9606.ENSP00000229135	9606.ENSP00000226574	0	FALSE	interacts with	IFNG (interacts with) NFKB1
0.987	0.295	0.99	0	0	0	0	interacts with	IFNG (interacts with) IL2	0	9606.ENSP00000229135	9606.ENSP00000226730	0	FALSE	interacts with	IFNG (interacts with) IL2
0.701	0.058	0.706	0	0	0	0	interacts with	IFNG (interacts with) MMP1	0	9606.ENSP00000229135	9606.ENSP00000322788	0	FALSE	interacts with	IFNG (interacts with) MMP1
0.713	0	0.713	0	0	0	0	interacts with	IFNG (interacts with) CXCL12	0	9606.ENSP00000229135	9606.ENSP00000379140	0	FALSE	interacts with	IFNG (interacts with) CXCL12
0.713	0	0.713	0	0	0	0	interacts with	IFNG (interacts with) CTNNB1	0	9606.ENSP00000229135	9606.ENSP00000495360	0	FALSE	interacts with	IFNG (interacts with) CTNNB1
0.72	0	0.72	0	0	0	0	interacts with	IFNG (interacts with) NELFCD	0	9606.ENSP00000229135	9606.ENSP00000473290	0	FALSE	interacts with	IFNG (interacts with) NELFCD
0.716	0.055	0.72	0	0	0	0	interacts with	IFNG (interacts with) MUC1	0	9606.ENSP00000229135	9606.ENSP00000484824	0	FALSE	interacts with	IFNG (interacts with) MUC1
0.737	0.09	0.751	0	0	0	0	interacts with	IFNG (interacts with) CD163	0	9606.ENSP00000229135	9606.ENSP00000352071	0	FALSE	interacts with	IFNG (interacts with) CD163
0.737	0.091	0.751	0	0	0	0	interacts with	IFNG (interacts with) MMP9	0	9606.ENSP00000229135	9606.ENSP00000361405	0	FALSE	interacts with	IFNG (interacts with) MMP9
0.741	0.083	0.752	0	0	0	0	interacts with	IFNG (interacts with) SPP1	0	9606.ENSP00000229135	9606.ENSP00000378517	0	FALSE	interacts with	IFNG (interacts with) SPP1
0.753	0.044	0.754	0	0	0	0	interacts with	IFNG (interacts with) IGF1	0	9606.ENSP00000229135	9606.ENSP00000376637	0	FALSE	interacts with	IFNG (interacts with) IGF1
0.769	0	0.769	0	0	0	0	interacts with	IFNG (interacts with) MAPK14	0	9606.ENSP00000229135	9606.ENSP00000229795	0	FALSE	interacts with	IFNG (interacts with) MAPK14
0.778	0	0.778	0	0	0	0	interacts with	IFNG (interacts with) IL33	0	9606.ENSP00000229135	9606.ENSP00000370842	0	FALSE	interacts with	IFNG (interacts with) IL33
0.789	0.043	0.79	0	0	0	0	interacts with	IFNG (interacts with) CSF1	0	9606.ENSP00000229135	9606.ENSP00000327513	0	FALSE	interacts with	IFNG (interacts with) CSF1
0.783	0.069	0.79	0	0	0	0	interacts with	IFNG (interacts with) MRC1	0	9606.ENSP00000229135	9606.ENSP00000455897	0	FALSE	interacts with	IFNG (interacts with) MRC1
0.782	0.086	0.792	0	0	0	0	interacts with	IFNG (interacts with) HMGB1	0	9606.ENSP00000229135	9606.ENSP00000345347	0	FALSE	interacts with	IFNG (interacts with) HMGB1
0.794	0	0.794	0	0	0	0	interacts with	IFNG (interacts with) GAPDH	0	9606.ENSP00000229135	9606.ENSP00000380070	0	FALSE	interacts with	IFNG (interacts with) GAPDH
0.783	0.092	0.795	0	0	0	0	interacts with	IFNG (interacts with) BCL2	0	9606.ENSP00000229135	9606.ENSP00000381185	0	FALSE	interacts with	IFNG (interacts with) BCL2
0.798	0.042	0.798	0	0	0	0	interacts with	IFNG (interacts with) CRP	0	9606.ENSP00000229135	9606.ENSP00000255030	0	FALSE	interacts with	IFNG (interacts with) CRP
0.801	0	0.801	0	0	0	0	interacts with	IFNG (interacts with) ARG1	0	9606.ENSP00000229135	9606.ENSP00000349446	0	FALSE	interacts with	IFNG (interacts with) ARG1
0.811	0.042	0.811	0	0	0	0	interacts with	IFNG (interacts with) CD68	0	9606.ENSP00000229135	9606.ENSP00000250092	0	FALSE	interacts with	IFNG (interacts with) CD68
0.813	0	0.813	0	0	0	0	interacts with	IFNG (interacts with) INS	0	9606.ENSP00000229135	9606.ENSP00000380432	0	FALSE	interacts with	IFNG (interacts with) INS
0.804	0.099	0.816	0	0	0	0	interacts with	IFNG (interacts with) PTGS2	0	9606.ENSP00000229135	9606.ENSP00000356438	0	FALSE	interacts with	IFNG (interacts with) PTGS2
0.816	0.049	0.817	0	0	0	0	interacts with	IFNG (interacts with) AKT1	0	9606.ENSP00000229135	9606.ENSP00000451828	0	FALSE	interacts with	IFNG (interacts with) AKT1
0.816	0.088	0.825	0	0	0	0	interacts with	IFNG (interacts with) CASP3	0	9606.ENSP00000229135	9606.ENSP00000311032	0	FALSE	interacts with	IFNG (interacts with) CASP3
0.826	0.086	0.834	0	0	0	0	interacts with	IFNG (interacts with) TP53	0	9606.ENSP00000229135	9606.ENSP00000269305	0	FALSE	interacts with	IFNG (interacts with) TP53
0.819	0.133	0.837	0	0	0	0	interacts with	IFNG (interacts with) CCR2	0	9606.ENSP00000229135	9606.ENSP00000292301	0	FALSE	interacts with	IFNG (interacts with) CCR2
0.861	0.05	0.862	0	0	0	0	interacts with	IFNG (interacts with) NOS2	0	9606.ENSP00000229135	9606.ENSP00000327251	0	FALSE	interacts with	IFNG (interacts with) NOS2
0.661	0	0.876	0.65	0	0	0	interacts with	IFNG (interacts with) EGFR	0	9606.ENSP00000229135	9606.ENSP00000275493	0	FALSE	interacts with	IFNG (interacts with) EGFR
0.885	0.105	0.893	0	0	0	0	interacts with	IFNG (interacts with) CASP1	0	9606.ENSP00000229135	9606.ENSP00000433138	0	FALSE	interacts with	IFNG (interacts with) CASP1
0.885	0.061	0.902	0	0.164	0	0	interacts with	IFNG (interacts with) ICAM1	0	9606.ENSP00000229135	9606.ENSP00000264832	0	FALSE	interacts with	IFNG (interacts with) ICAM1
0.905	0.058	0.907	0	0	0	0	interacts with	IFNG (interacts with) STAT3	0	9606.ENSP00000229135	9606.ENSP00000264657	0	FALSE	interacts with	IFNG (interacts with) STAT3
0.916	0.06	0.918	0	0	0	0	interacts with	IFNG (interacts with) TLR2	0	9606.ENSP00000229135	9606.ENSP00000260010	0	FALSE	interacts with	IFNG (interacts with) TLR2
0.917	0.072	0.92	0	0	0	0	interacts with	IFNG (interacts with) ITGAM	0	9606.ENSP00000229135	9606.ENSP00000496959	0	FALSE	interacts with	IFNG (interacts with) ITGAM
0.892	0.297	0.921	0	0	0	0	interacts with	IFNG (interacts with) CCL5	0	9606.ENSP00000229135	9606.ENSP00000474412	0	FALSE	interacts with	IFNG (interacts with) CCL5
0.917	0.126	0.924	0	0	0	0	interacts with	IFNG (interacts with) PTPRC	0	9606.ENSP00000229135	9606.ENSP00000411355	0	FALSE	interacts with	IFNG (interacts with) PTPRC
0.925	0.072	0.928	0	0	0	0	interacts with	IFNG (interacts with) ITGAX	0	9606.ENSP00000229135	9606.ENSP00000454623	0	FALSE	interacts with	IFNG (interacts with) ITGAX
0.856	0.555	0.933	0	0	0	0	interacts with	IFNG (interacts with) FASLG	0	9606.ENSP00000229135	9606.ENSP00000356694	0	FALSE	interacts with	IFNG (interacts with) FASLG
0.916	0.343	0.942	0	0	0	0	interacts with	IFNG (interacts with) CCL4	0	9606.ENSP00000229135	9606.ENSP00000482259	0	FALSE	interacts with	IFNG (interacts with) CCL4
0.945	0.056	0.946	0	0	0	0	interacts with	IFNG (interacts with) TLR4	0	9606.ENSP00000229135	9606.ENSP00000363089	0	FALSE	interacts with	IFNG (interacts with) TLR4
0.924	0.332	0.947	0	0	0	0	interacts with	IFNG (interacts with) CCL3	0	9606.ENSP00000229135	9606.ENSP00000477908	0	FALSE	interacts with	IFNG (interacts with) CCL3
0.923	0.352	0.948	0	0	0	0	interacts with	IFNG (interacts with) CXCL9	0	9606.ENSP00000229135	9606.ENSP00000354901	0	FALSE	interacts with	IFNG (interacts with) CXCL9
0.945	0.104	0.949	0	0	0	0	interacts with	IFNG (interacts with) IL18	0	9606.ENSP00000229135	9606.ENSP00000280357	0	FALSE	interacts with	IFNG (interacts with) IL18
0.95	0.115	0.954	0	0	0	0	interacts with	IFNG (interacts with) IFNA1	0	9606.ENSP00000229135	9606.ENSP00000276927	0	FALSE	interacts with	IFNG (interacts with) IFNA1
0.942	0.321	0.959	0	0	0	0	interacts with	IFNG (interacts with) CXCL10	0	9606.ENSP00000229135	9606.ENSP00000305651	0	FALSE	interacts with	IFNG (interacts with) CXCL10
0.959	0.072	0.96	0	0	0	0	interacts with	IFNG (interacts with) IL5	0	9606.ENSP00000229135	9606.ENSP00000231454	0	FALSE	interacts with	IFNG (interacts with) IL5
0.942	0.152	0.961	0	0	0	0	interacts with	IFNG (interacts with) CXCL8	0	9606.ENSP00000229135	9606.ENSP00000306512	0.281	FALSE	interacts with	IFNG (interacts with) CXCL8
0.96	0.072	0.961	0	0	0	0	interacts with	IFNG (interacts with) IL13	0	9606.ENSP00000229135	9606.ENSP00000304915	0	FALSE	interacts with	IFNG (interacts with) IL13
0.966	0.166	0.971	0	0	0	0	interacts with	IFNG (interacts with) IL1A	0	9606.ENSP00000229135	9606.ENSP00000263339	0	FALSE	interacts with	IFNG (interacts with) IL1A
0.975	0.134	0.978	0	0	0	0	interacts with	IFNG (interacts with) IL17A	0	9606.ENSP00000229135	9606.ENSP00000497968	0	FALSE	interacts with	IFNG (interacts with) IL17A
0.95	0.114	0.982	0.5	0.301	0	0	interacts with	IFNG (interacts with) FOXP3	0	9606.ENSP00000229135	9606.ENSP00000365380	0	FALSE	interacts with	IFNG (interacts with) FOXP3
0.981	0.128	0.983	0	0	0	0	interacts with	IFNG (interacts with) IL6	0	9606.ENSP00000229135	9606.ENSP00000385675	0	FALSE	interacts with	IFNG (interacts with) IL6
0.981	0.181	0.984	0	0	0	0	interacts with	IFNG (interacts with) CSF2	0	9606.ENSP00000229135	9606.ENSP00000296871	0	FALSE	interacts with	IFNG (interacts with) CSF2
0.987	0.322	0.99	0	0	0	0	interacts with	IFNG (interacts with) CD8A	0	9606.ENSP00000229135	9606.ENSP00000386559	0	FALSE	interacts with	IFNG (interacts with) CD8A
0.99	0.11	0.99	0	0	0	0	interacts with	IFNG (interacts with) IL4	0	9606.ENSP00000229135	9606.ENSP00000231449	0	FALSE	interacts with	IFNG (interacts with) IL4
0.99	0.202	0.991	0	0	0	0	interacts with	IFNG (interacts with) TNF	0	9606.ENSP00000229135	9606.ENSP00000398698	0	FALSE	interacts with	IFNG (interacts with) TNF
0.989	0.566	0.995	0	0	0	0	interacts with	IFNG (interacts with) IL10	0	9606.ENSP00000229135	9606.ENSP00000412237	0	FALSE	interacts with	IFNG (interacts with) IL10
0.997	0.273	0.998	0	0	0	0	interacts with	IFNG (interacts with) IL1B	0	9606.ENSP00000229135	9606.ENSP00000263341	0	FALSE	interacts with	IFNG (interacts with) IL1B
0.682	0.082	0.809	0.4	0	0	0	interacts with	IGF1 (interacts with) MMP2	0	9606.ENSP00000376637	9606.ENSP00000219070	0	FALSE	interacts with	IGF1 (interacts with) MMP2
0.976	0	0.976	0	0	0	0	interacts with	IGF1 (interacts with) TGFB1	0	9606.ENSP00000376637	9606.ENSP00000221930	0	FALSE	interacts with	IGF1 (interacts with) TGFB1
0.866	0.061	0.869	0	0	0	0	interacts with	IGF1 (interacts with) HGF	0	9606.ENSP00000376637	9606.ENSP00000222390	0	FALSE	interacts with	IGF1 (interacts with) HGF
0.733	0.042	0.733	0	0	0	0	interacts with	IGF1 (interacts with) SERPINE1	0	9606.ENSP00000376637	9606.ENSP00000223095	0	FALSE	interacts with	IGF1 (interacts with) SERPINE1
0.755	0.06	0.76	0	0	0	0	interacts with	IGF1 (interacts with) CCL2	0	9606.ENSP00000376637	9606.ENSP00000225831	0	FALSE	interacts with	IGF1 (interacts with) CCL2
0.697	0.097	0.714	0	0	0	0	interacts with	IGF1 (interacts with) COL1A1	0	9606.ENSP00000376637	9606.ENSP00000225964	0	FALSE	interacts with	IGF1 (interacts with) COL1A1
0.753	0.044	0.754	0	0	0	0	interacts with	IGF1 (interacts with) IFNG	0	9606.ENSP00000376637	9606.ENSP00000229135	0	FALSE	interacts with	IGF1 (interacts with) IFNG
0.759	0.048	0.76	0	0	0	0	interacts with	IGF1 (interacts with) CRP	0	9606.ENSP00000376637	9606.ENSP00000255030	0	FALSE	interacts with	IGF1 (interacts with) CRP
0.731	0	0.731	0	0	0	0	interacts with	IGF1 (interacts with) CDH1	0	9606.ENSP00000376637	9606.ENSP00000261769	0	FALSE	interacts with	IGF1 (interacts with) CDH1
0.716	0	0.716	0	0	0	0	interacts with	IGF1 (interacts with) SMAD2	0	9606.ENSP00000376637	9606.ENSP00000262160	0	FALSE	interacts with	IGF1 (interacts with) SMAD2
0.847	0	0.847	0	0	0	0	interacts with	IGF1 (interacts with) IL1B	0	9606.ENSP00000376637	9606.ENSP00000263341	0	FALSE	interacts with	IGF1 (interacts with) IL1B
0.882	0.043	0.882	0	0	0	0	interacts with	IGF1 (interacts with) FGF2	0	9606.ENSP00000376637	9606.ENSP00000264498	0	FALSE	interacts with	IGF1 (interacts with) FGF2
0.845	0.042	0.845	0	0	0	0	interacts with	IGF1 (interacts with) STAT3	0	9606.ENSP00000376637	9606.ENSP00000264657	0	FALSE	interacts with	IGF1 (interacts with) STAT3
0.72	0	0.72	0	0	0	0	interacts with	IGF1 (interacts with) TP53	0	9606.ENSP00000376637	9606.ENSP00000269305	0	FALSE	interacts with	IGF1 (interacts with) TP53
0.919	0	0.991	0.9	0	0	0	interacts with	IGF1 (interacts with) EGFR	0	9606.ENSP00000376637	9606.ENSP00000275493	0	FALSE	interacts with	IGF1 (interacts with) EGFR
0.828	0.044	0.828	0	0	0	0	interacts with	IGF1 (interacts with) PPARG	0	9606.ENSP00000376637	9606.ENSP00000287820	0	FALSE	interacts with	IGF1 (interacts with) PPARG
0.901	0.107	0.907	0	0	0	0	interacts with	IGF1 (interacts with) FN1	0	9606.ENSP00000376637	9606.ENSP00000346839	0	FALSE	interacts with	IGF1 (interacts with) FN1
0.781	0	0.781	0	0	0	0	interacts with	IGF1 (interacts with) MTOR	0	9606.ENSP00000376637	9606.ENSP00000354558	0	FALSE	interacts with	IGF1 (interacts with) MTOR
0.74	0	0.74	0	0	0	0	interacts with	IGF1 (interacts with) TGFB2	0	9606.ENSP00000376637	9606.ENSP00000355896	0	FALSE	interacts with	IGF1 (interacts with) TGFB2
0.829	0.049	0.83	0	0	0	0	interacts with	IGF1 (interacts with) CCN2	0	9606.ENSP00000376637	9606.ENSP00000356954	0	FALSE	interacts with	IGF1 (interacts with) CCN2
0.765	0.049	0.767	0	0	0	0	interacts with	IGF1 (interacts with) MMP9	0	9606.ENSP00000376637	9606.ENSP00000361405	0	FALSE	interacts with	IGF1 (interacts with) MMP9
0.696	0.104	0.716	0	0	0	0	interacts with	IGF1 (interacts with) IL10	0	9606.ENSP00000376637	9606.ENSP00000412237	0	FALSE	interacts with	IGF1 (interacts with) IL10
0.762	0.056	0.765	0	0	0	0	interacts with	IGF1 (interacts with) BCL2	0	9606.ENSP00000376637	9606.ENSP00000381185	0	FALSE	interacts with	IGF1 (interacts with) BCL2
0.837	0	0.837	0	0	0	0	interacts with	IGF1 (interacts with) TNF	0	9606.ENSP00000376637	9606.ENSP00000398698	0	FALSE	interacts with	IGF1 (interacts with) TNF
0.795	0.277	0.845	0	0	0	0	interacts with	IGF1 (interacts with) CXCL12	0	9606.ENSP00000376637	9606.ENSP00000379140	0	FALSE	interacts with	IGF1 (interacts with) CXCL12
0.913	0	0.913	0	0	0	0	interacts with	IGF1 (interacts with) IL6	0	9606.ENSP00000376637	9606.ENSP00000385675	0	FALSE	interacts with	IGF1 (interacts with) IL6
0.934	0	0.935	0	0.063	0	0	interacts with	IGF1 (interacts with) AKT1	0	9606.ENSP00000376637	9606.ENSP00000451828	0	FALSE	interacts with	IGF1 (interacts with) AKT1
0.812	0	0.98	0.9	0	0	0	interacts with	IGF1 (interacts with) TGFA	0	9606.ENSP00000376637	9606.ENSP00000404131	0	FALSE	interacts with	IGF1 (interacts with) TGFA
0.999	0	0.999	0.9	0	0	0	interacts with	IGF1 (interacts with) INS	0	9606.ENSP00000376637	9606.ENSP00000380432	0	FALSE	interacts with	IGF1 (interacts with) INS
0.974	0.094	0.976	0	0	0	0	interacts with	IL10 (interacts with) CD4	0	9606.ENSP00000412237	9606.ENSP00000011653	0	FALSE	interacts with	IL10 (interacts with) CD4
0.806	0.128	0.954	0.75	0	0	0	interacts with	IL10 (interacts with) TIMP1	0	9606.ENSP00000412237	9606.ENSP00000218388	0	FALSE	interacts with	IL10 (interacts with) TIMP1
0.619	0	0.761	0.4	0	0	0	interacts with	IL10 (interacts with) MMP2	0	9606.ENSP00000412237	9606.ENSP00000219070	0	FALSE	interacts with	IL10 (interacts with) MMP2
0.724	0.197	0.768	0	0	0	0	interacts with	IL10 (interacts with) CCL17	0	9606.ENSP00000412237	9606.ENSP00000219244	0	FALSE	interacts with	IL10 (interacts with) CCL17
0.891	0	0.932	0.4	0	0	0	interacts with	IL10 (interacts with) TGFB1	0	9606.ENSP00000412237	9606.ENSP00000221930	0	FALSE	interacts with	IL10 (interacts with) TGFB1
0.697	0.056	0.813	0.4	0	0	0	interacts with	IL10 (interacts with) HGF	0	9606.ENSP00000412237	9606.ENSP00000222390	0	FALSE	interacts with	IL10 (interacts with) HGF
0.881	0.056	0.927	0.4	0	0	0	interacts with	IL10 (interacts with) CSF3	0	9606.ENSP00000412237	9606.ENSP00000225474	0	FALSE	interacts with	IL10 (interacts with) CSF3
0.929	0.214	0.963	0.4	0	0	0	interacts with	IL10 (interacts with) CCL2	0	9606.ENSP00000412237	9606.ENSP00000225831	0	FALSE	interacts with	IL10 (interacts with) CCL2
0.872	0.075	0.877	0	0	0	0	interacts with	IL10 (interacts with) NFKB1	0	9606.ENSP00000412237	9606.ENSP00000226574	0	FALSE	interacts with	IL10 (interacts with) NFKB1
0.963	0.056	0.964	0	0	0	0	interacts with	IL10 (interacts with) IL2	0	9606.ENSP00000412237	9606.ENSP00000226730	0	FALSE	interacts with	IL10 (interacts with) IL2
0.989	0.566	0.995	0	0	0	0	interacts with	IL10 (interacts with) IFNG	0	9606.ENSP00000412237	9606.ENSP00000229135	0	FALSE	interacts with	IL10 (interacts with) IFNG
0.986	0.043	0.986	0	0	0	0	interacts with	IL10 (interacts with) IL4	0	9606.ENSP00000412237	9606.ENSP00000231449	0	FALSE	interacts with	IL10 (interacts with) IL4
0.982	0	0.982	0	0	0	0	interacts with	IL10 (interacts with) IL5	0	9606.ENSP00000412237	9606.ENSP00000231454	0	FALSE	interacts with	IL10 (interacts with) IL5
0.79	0.058	0.794	0	0	0	0	interacts with	IL10 (interacts with) CD68	0	9606.ENSP00000412237	9606.ENSP00000250092	0	FALSE	interacts with	IL10 (interacts with) CD68
0.872	0.086	0.878	0	0	0	0	interacts with	IL10 (interacts with) CRP	0	9606.ENSP00000412237	9606.ENSP00000255030	0	FALSE	interacts with	IL10 (interacts with) CRP
0.874	0.072	0.923	0.4	0	0	0	interacts with	IL10 (interacts with) IL1RN	0	9606.ENSP00000412237	9606.ENSP00000259206	0	FALSE	interacts with	IL10 (interacts with) IL1RN
0.952	0.09	0.956	0	0.062	0	0	interacts with	IL10 (interacts with) TLR2	0	9606.ENSP00000412237	9606.ENSP00000260010	0	FALSE	interacts with	IL10 (interacts with) TLR2
0.944	0.209	0.971	0.4	0	0	0	interacts with	IL10 (interacts with) IL1A	0	9606.ENSP00000412237	9606.ENSP00000263339	0	FALSE	interacts with	IL10 (interacts with) IL1A
0.978	0.409	0.991	0.4	0	0	0	interacts with	IL10 (interacts with) IL1B	0	9606.ENSP00000412237	9606.ENSP00000263341	0	FALSE	interacts with	IL10 (interacts with) IL1B
0.716	0	0.822	0.4	0	0	0	interacts with	IL10 (interacts with) FGF2	0	9606.ENSP00000412237	9606.ENSP00000264498	0	FALSE	interacts with	IL10 (interacts with) FGF2
0.916	0.057	0.968	0.5	0.301	0	0	interacts with	IL10 (interacts with) STAT3	0	9606.ENSP00000412237	9606.ENSP00000264657	0	FALSE	interacts with	IL10 (interacts with) STAT3
0.794	0.056	0.873	0.4	0	0	0	interacts with	IL10 (interacts with) ICAM1	0	9606.ENSP00000412237	9606.ENSP00000264832	0	FALSE	interacts with	IL10 (interacts with) ICAM1
0.746	0.082	0.756	0	0	0	0	interacts with	IL10 (interacts with) TP53	0	9606.ENSP00000412237	9606.ENSP00000269305	0	FALSE	interacts with	IL10 (interacts with) TP53
0.724	0	0.899	0.65	0	0	0	interacts with	IL10 (interacts with) EGFR	0	9606.ENSP00000412237	9606.ENSP00000275493	0	FALSE	interacts with	IL10 (interacts with) EGFR
0.843	0.101	0.852	0	0	0	0	interacts with	IL10 (interacts with) IFNA1	0	9606.ENSP00000412237	9606.ENSP00000276927	0	FALSE	interacts with	IL10 (interacts with) IFNA1
0.917	0.165	0.955	0.4	0	0	0	interacts with	IL10 (interacts with) IL18	0	9606.ENSP00000412237	9606.ENSP00000280357	0	FALSE	interacts with	IL10 (interacts with) IL18
0.731	0.047	0.733	0	0	0	0	interacts with	IL10 (interacts with) PPARG	0	9606.ENSP00000412237	9606.ENSP00000287820	0	FALSE	interacts with	IL10 (interacts with) PPARG
0.792	0.103	0.878	0.4	0	0	0	interacts with	IL10 (interacts with) CCR2	0	9606.ENSP00000412237	9606.ENSP00000292301	0	FALSE	interacts with	IL10 (interacts with) CCR2
0.93	0.096	0.959	0.4	0	0	0	interacts with	IL10 (interacts with) CSF2	0	9606.ENSP00000412237	9606.ENSP00000296871	0	FALSE	interacts with	IL10 (interacts with) CSF2
0.952	0.043	0.952	0	0	0	0	interacts with	IL10 (interacts with) IL13	0	9606.ENSP00000412237	9606.ENSP00000304915	0	FALSE	interacts with	IL10 (interacts with) IL13
0.925	0.225	0.962	0.4	0	0	0	interacts with	IL10 (interacts with) CXCL10	0	9606.ENSP00000412237	9606.ENSP00000305651	0	FALSE	interacts with	IL10 (interacts with) CXCL10
0.946	0.147	0.97	0.4	0	0	0	interacts with	IL10 (interacts with) CXCL8	0	9606.ENSP00000412237	9606.ENSP00000306512	0	FALSE	interacts with	IL10 (interacts with) CXCL8
0.786	0	0.786	0	0	0	0	interacts with	IL10 (interacts with) CASP3	0	9606.ENSP00000412237	9606.ENSP00000311032	0	FALSE	interacts with	IL10 (interacts with) CASP3
0.574	0.054	0.737	0.4	0	0	0	interacts with	IL10 (interacts with) MMP1	0	9606.ENSP00000412237	9606.ENSP00000322788	0	FALSE	interacts with	IL10 (interacts with) MMP1
0.718	0	0.718	0	0	0	0	interacts with	IL10 (interacts with) NOS2	0	9606.ENSP00000412237	9606.ENSP00000327251	0	FALSE	interacts with	IL10 (interacts with) NOS2
0.792	0.047	0.87	0.4	0	0	0	interacts with	IL10 (interacts with) CSF1	0	9606.ENSP00000412237	9606.ENSP00000327513	0	FALSE	interacts with	IL10 (interacts with) CSF1
0.692	0.083	0.705	0	0	0	0	interacts with	IL10 (interacts with) HMGB1	0	9606.ENSP00000412237	9606.ENSP00000345347	0	FALSE	interacts with	IL10 (interacts with) HMGB1
0.752	0	0.752	0	0	0	0	interacts with	IL10 (interacts with) FN1	0	9606.ENSP00000412237	9606.ENSP00000346839	0	FALSE	interacts with	IL10 (interacts with) FN1
0.887	0.087	0.893	0	0	0	0	interacts with	IL10 (interacts with) ARG1	0	9606.ENSP00000412237	9606.ENSP00000349446	0	FALSE	interacts with	IL10 (interacts with) ARG1
0.718	0.065	0.725	0	0	0	0	interacts with	IL10 (interacts with) CX3CR1	0	9606.ENSP00000412237	9606.ENSP00000351059	0	FALSE	interacts with	IL10 (interacts with) CX3CR1
0.814	0.126	0.955	0.75	0	0	0	interacts with	IL10 (interacts with) CD163	0	9606.ENSP00000412237	9606.ENSP00000352071	0	FALSE	interacts with	IL10 (interacts with) CD163
0.74	0	0.74	0	0	0	0	interacts with	IL10 (interacts with) MTOR	0	9606.ENSP00000412237	9606.ENSP00000354558	0	FALSE	interacts with	IL10 (interacts with) MTOR
0.794	0.157	0.819	0	0	0	0	interacts with	IL10 (interacts with) CXCL9	0	9606.ENSP00000412237	9606.ENSP00000354901	0	FALSE	interacts with	IL10 (interacts with) CXCL9
0.786	0.056	0.789	0	0	0	0	interacts with	IL10 (interacts with) PTGS2	0	9606.ENSP00000412237	9606.ENSP00000356438	0	FALSE	interacts with	IL10 (interacts with) PTGS2
0.873	0.129	0.885	0	0	0	0	interacts with	IL10 (interacts with) FASLG	0	9606.ENSP00000412237	9606.ENSP00000356694	0	FALSE	interacts with	IL10 (interacts with) FASLG
0.808	0.053	0.881	0.4	0	0	0	interacts with	IL10 (interacts with) MMP9	0	9606.ENSP00000412237	9606.ENSP00000361405	0	FALSE	interacts with	IL10 (interacts with) MMP9
0.939	0.068	0.943	0	0.079	0	0	interacts with	IL10 (interacts with) TLR4	0	9606.ENSP00000412237	9606.ENSP00000363089	0	FALSE	interacts with	IL10 (interacts with) TLR4
0.952	0.105	0.955	0	0	0	0	interacts with	IL10 (interacts with) FOXP3	0	9606.ENSP00000412237	9606.ENSP00000365380	0	FALSE	interacts with	IL10 (interacts with) FOXP3
0.792	0.043	0.793	0	0	0	0	interacts with	IL10 (interacts with) IL33	0	9606.ENSP00000412237	9606.ENSP00000370842	0	FALSE	interacts with	IL10 (interacts with) IL33
0.696	0.104	0.716	0	0	0	0	interacts with	IL10 (interacts with) IGF1	0	9606.ENSP00000412237	9606.ENSP00000376637	0	FALSE	interacts with	IL10 (interacts with) IGF1
0.725	0	0.725	0	0	0	0	interacts with	IL10 (interacts with) CXCL12	0	9606.ENSP00000412237	9606.ENSP00000379140	0	FALSE	interacts with	IL10 (interacts with) CXCL12
0.782	0	0.782	0	0	0	0	interacts with	IL10 (interacts with) GAPDH	0	9606.ENSP00000412237	9606.ENSP00000380070	0	FALSE	interacts with	IL10 (interacts with) GAPDH
0.819	0	0.819	0	0	0	0	interacts with	IL10 (interacts with) INS	0	9606.ENSP00000412237	9606.ENSP00000380432	0	FALSE	interacts with	IL10 (interacts with) INS
0.718	0	0.718	0	0	0	0	interacts with	IL10 (interacts with) BCL2	0	9606.ENSP00000412237	9606.ENSP00000381185	0	FALSE	interacts with	IL10 (interacts with) BCL2
0.988	0.13	0.997	0.8	0	0	0	interacts with	IL10 (interacts with) IL6	0	9606.ENSP00000412237	9606.ENSP00000385675	0	FALSE	interacts with	IL10 (interacts with) IL6
0.955	0.105	0.958	0	0	0	0	interacts with	IL10 (interacts with) CD8A	0	9606.ENSP00000412237	9606.ENSP00000386559	0	FALSE	interacts with	IL10 (interacts with) CD8A
0.984	0.234	0.992	0.4	0	0	0	interacts with	IL10 (interacts with) TNF	0	9606.ENSP00000412237	9606.ENSP00000398698	0	FALSE	interacts with	IL10 (interacts with) TNF
0.798	0.067	0.804	0	0	0	0	interacts with	IL10 (interacts with) PTPRC	0	9606.ENSP00000412237	9606.ENSP00000411355	0	FALSE	interacts with	IL10 (interacts with) PTPRC
0.699	0.067	0.707	0	0	0	0	interacts with	IL10 (interacts with) MUC1	0	9606.ENSP00000412237	9606.ENSP00000484824	0	FALSE	interacts with	IL10 (interacts with) MUC1
0.723	0.045	0.724	0	0	0	0	interacts with	IL10 (interacts with) CASP1	0	9606.ENSP00000412237	9606.ENSP00000433138	0	FALSE	interacts with	IL10 (interacts with) CASP1
0.728	0	0.731	0	0.052	0	0	interacts with	IL10 (interacts with) AKT1	0	9606.ENSP00000412237	9606.ENSP00000451828	0	FALSE	interacts with	IL10 (interacts with) AKT1
0.749	0.048	0.751	0	0	0	0	interacts with	IL10 (interacts with) HIF1A	0	9606.ENSP00000412237	9606.ENSP00000437955	0	FALSE	interacts with	IL10 (interacts with) HIF1A
0.826	0.082	0.834	0	0	0	0	interacts with	IL10 (interacts with) ITGAX	0	9606.ENSP00000412237	9606.ENSP00000454623	0	FALSE	interacts with	IL10 (interacts with) ITGAX
0.842	0.124	0.856	0	0	0	0	interacts with	IL10 (interacts with) MRC1	0	9606.ENSP00000412237	9606.ENSP00000455897	0	FALSE	interacts with	IL10 (interacts with) MRC1
0.852	0.063	0.856	0	0	0	0	interacts with	IL10 (interacts with) ITGAM	0	9606.ENSP00000412237	9606.ENSP00000496959	0	FALSE	interacts with	IL10 (interacts with) ITGAM
0.873	0.228	0.936	0.4	0	0	0	interacts with	IL10 (interacts with) CCL4	0	9606.ENSP00000412237	9606.ENSP00000482259	0	FALSE	interacts with	IL10 (interacts with) CCL4
0.89	0.229	0.945	0.4	0	0	0	interacts with	IL10 (interacts with) CCL5	0	9606.ENSP00000412237	9606.ENSP00000474412	0	FALSE	interacts with	IL10 (interacts with) CCL5
0.944	0.227	0.972	0.4	0	0	0	interacts with	IL10 (interacts with) CCL3	0	9606.ENSP00000412237	9606.ENSP00000477908	0	FALSE	interacts with	IL10 (interacts with) CCL3
0.965	0.119	0.98	0.4	0	0	0	interacts with	IL10 (interacts with) IL17A	0	9606.ENSP00000412237	9606.ENSP00000497968	0	FALSE	interacts with	IL10 (interacts with) IL17A
0.931	0	0.931	0	0	0	0	interacts with	IL13 (interacts with) CD4	0	9606.ENSP00000304915	9606.ENSP00000011653	0	FALSE	interacts with	IL13 (interacts with) CD4
0.702	0	0.702	0	0	0	0	interacts with	IL13 (interacts with) TIMP1	0	9606.ENSP00000304915	9606.ENSP00000218388	0	FALSE	interacts with	IL13 (interacts with) TIMP1
0.902	0.145	0.913	0	0	0	0	interacts with	IL13 (interacts with) CCL17	0	9606.ENSP00000304915	9606.ENSP00000219244	0	FALSE	interacts with	IL13 (interacts with) CCL17
0.814	0.054	0.816	0	0	0	0	interacts with	IL13 (interacts with) TGFB1	0	9606.ENSP00000304915	9606.ENSP00000221930	0	FALSE	interacts with	IL13 (interacts with) TGFB1
0.814	0.146	0.834	0	0	0	0	interacts with	IL13 (interacts with) CSF3	0	9606.ENSP00000304915	9606.ENSP00000225474	0	FALSE	interacts with	IL13 (interacts with) CSF3
0.891	0.049	0.932	0.4	0	0	0	interacts with	IL13 (interacts with) CCL2	0	9606.ENSP00000304915	9606.ENSP00000225831	0	FALSE	interacts with	IL13 (interacts with) CCL2
0.922	0.2	0.934	0	0	0	0	interacts with	IL13 (interacts with) IL2	0	9606.ENSP00000304915	9606.ENSP00000226730	0	FALSE	interacts with	IL13 (interacts with) IL2
0.96	0.072	0.961	0	0	0	0	interacts with	IL13 (interacts with) IFNG	0	9606.ENSP00000304915	9606.ENSP00000229135	0	FALSE	interacts with	IL13 (interacts with) IFNG
0.991	0.301	0.993	0	0	0	0	interacts with	IL13 (interacts with) IL4	0	9606.ENSP00000304915	9606.ENSP00000231449	0	FALSE	interacts with	IL13 (interacts with) IL4
0.986	0.406	0.991	0	0	0	0	interacts with	IL13 (interacts with) IL5	0	9606.ENSP00000304915	9606.ENSP00000231454	0	FALSE	interacts with	IL13 (interacts with) IL5
0.702	0.042	0.702	0	0	0	0	interacts with	IL13 (interacts with) IL1RN	0	9606.ENSP00000304915	9606.ENSP00000259206	0	FALSE	interacts with	IL13 (interacts with) IL1RN
0.697	0.056	0.702	0	0	0	0	interacts with	IL13 (interacts with) TLR2	0	9606.ENSP00000304915	9606.ENSP00000260010	0	FALSE	interacts with	IL13 (interacts with) TLR2
0.9	0.123	0.943	0.4	0	0	0	interacts with	IL13 (interacts with) IL1A	0	9606.ENSP00000304915	9606.ENSP00000263339	0	FALSE	interacts with	IL13 (interacts with) IL1A
0.922	0.087	0.953	0.4	0	0	0	interacts with	IL13 (interacts with) IL1B	0	9606.ENSP00000304915	9606.ENSP00000263341	0	FALSE	interacts with	IL13 (interacts with) IL1B
0.709	0.069	0.717	0	0	0	0	interacts with	IL13 (interacts with) FGF2	0	9606.ENSP00000304915	9606.ENSP00000264498	0	FALSE	interacts with	IL13 (interacts with) FGF2
0.699	0	0.843	0.5	0	0	0	interacts with	IL13 (interacts with) STAT3	0	9606.ENSP00000304915	9606.ENSP00000264657	0	FALSE	interacts with	IL13 (interacts with) STAT3
0.764	0.059	0.768	0	0	0	0	interacts with	IL13 (interacts with) ICAM1	0	9606.ENSP00000304915	9606.ENSP00000264832	0	FALSE	interacts with	IL13 (interacts with) ICAM1
0.477	0	0.809	0.65	0	0	0	interacts with	IL13 (interacts with) EGFR	0	9606.ENSP00000304915	9606.ENSP00000275493	0	FALSE	interacts with	IL13 (interacts with) EGFR
0.713	0	0.713	0	0	0	0	interacts with	IL13 (interacts with) IFNA1	0	9606.ENSP00000304915	9606.ENSP00000276927	0	FALSE	interacts with	IL13 (interacts with) IFNA1
0.867	0	0.916	0.4	0	0	0	interacts with	IL13 (interacts with) IL18	0	9606.ENSP00000304915	9606.ENSP00000280357	0	FALSE	interacts with	IL13 (interacts with) IL18
0.921	0.204	0.934	0	0	0	0	interacts with	IL13 (interacts with) CSF2	0	9606.ENSP00000304915	9606.ENSP00000296871	0	FALSE	interacts with	IL13 (interacts with) CSF2
0.71	0	0.71	0	0	0	0	interacts with	IL13 (interacts with) CD163	0	9606.ENSP00000304915	9606.ENSP00000352071	0	FALSE	interacts with	IL13 (interacts with) CD163
0.72	0.047	0.722	0	0	0	0	interacts with	IL13 (interacts with) CXCL9	0	9606.ENSP00000304915	9606.ENSP00000354901	0	FALSE	interacts with	IL13 (interacts with) CXCL9
0.726	0	0.726	0	0	0	0	interacts with	IL13 (interacts with) TGFA	0	9606.ENSP00000304915	9606.ENSP00000404131	0	FALSE	interacts with	IL13 (interacts with) TGFA
0.732	0.047	0.733	0	0	0	0	interacts with	IL13 (interacts with) CSF1	0	9606.ENSP00000304915	9606.ENSP00000327513	0	FALSE	interacts with	IL13 (interacts with) CSF1
0.571	0.055	0.735	0.4	0	0	0	interacts with	IL13 (interacts with) FN1	0	9606.ENSP00000304915	9606.ENSP00000346839	0	FALSE	interacts with	IL13 (interacts with) FN1
0.729	0.103	0.747	0	0	0	0	interacts with	IL13 (interacts with) CCL18	0	9606.ENSP00000304915	9606.ENSP00000479955	0	FALSE	interacts with	IL13 (interacts with) CCL18
0.756	0.055	0.759	0	0	0	0	interacts with	IL13 (interacts with) MMP9	0	9606.ENSP00000304915	9606.ENSP00000361405	0	FALSE	interacts with	IL13 (interacts with) MMP9
0.803	0.056	0.806	0	0	0	0	interacts with	IL13 (interacts with) TLR4	0	9606.ENSP00000304915	9606.ENSP00000363089	0	FALSE	interacts with	IL13 (interacts with) TLR4
0.798	0.086	0.807	0	0	0	0	interacts with	IL13 (interacts with) ARG1	0	9606.ENSP00000304915	9606.ENSP00000349446	0	FALSE	interacts with	IL13 (interacts with) ARG1
0.786	0.138	0.808	0	0	0	0	interacts with	IL13 (interacts with) FOXP3	0	9606.ENSP00000304915	9606.ENSP00000365380	0	FALSE	interacts with	IL13 (interacts with) FOXP3
0.713	0.06	0.824	0.4	0	0	0	interacts with	IL13 (interacts with) ITGAX	0	9606.ENSP00000304915	9606.ENSP00000454623	0	FALSE	interacts with	IL13 (interacts with) ITGAX
0.72	0.06	0.828	0.4	0	0	0	interacts with	IL13 (interacts with) ITGAM	0	9606.ENSP00000304915	9606.ENSP00000496959	0	FALSE	interacts with	IL13 (interacts with) ITGAM
0.826	0.062	0.83	0	0	0	0	interacts with	IL13 (interacts with) CCL4	0	9606.ENSP00000304915	9606.ENSP00000482259	0	FALSE	interacts with	IL13 (interacts with) CCL4
0.834	0	0.834	0	0	0	0	interacts with	IL13 (interacts with) CCL5	0	9606.ENSP00000304915	9606.ENSP00000474412	0	FALSE	interacts with	IL13 (interacts with) CCL5
0.84	0	0.84	0	0	0	0	interacts with	IL13 (interacts with) MRC1	0	9606.ENSP00000304915	9606.ENSP00000455897	0	FALSE	interacts with	IL13 (interacts with) MRC1
0.854	0	0.854	0	0	0	0	interacts with	IL13 (interacts with) CD8A	0	9606.ENSP00000304915	9606.ENSP00000386559	0	FALSE	interacts with	IL13 (interacts with) CD8A
0.871	0.042	0.871	0	0	0	0	interacts with	IL13 (interacts with) CXCL10	0	9606.ENSP00000304915	9606.ENSP00000305651	0	FALSE	interacts with	IL13 (interacts with) CXCL10
0.89	0.082	0.895	0	0	0	0	interacts with	IL13 (interacts with) CCL3	0	9606.ENSP00000304915	9606.ENSP00000477908	0	FALSE	interacts with	IL13 (interacts with) CCL3
0.937	0	0.937	0	0	0	0	interacts with	IL13 (interacts with) IL33	0	9606.ENSP00000304915	9606.ENSP00000370842	0	FALSE	interacts with	IL13 (interacts with) IL33
0.904	0.049	0.94	0.4	0	0	0	interacts with	IL13 (interacts with) CXCL8	0	9606.ENSP00000304915	9606.ENSP00000306512	0	FALSE	interacts with	IL13 (interacts with) CXCL8
0.936	0.104	0.94	0	0	0	0	interacts with	IL13 (interacts with) IL17A	0	9606.ENSP00000304915	9606.ENSP00000497968	0	FALSE	interacts with	IL13 (interacts with) IL17A
0.952	0.043	0.952	0	0	0	0	interacts with	IL13 (interacts with) IL10	0	9606.ENSP00000304915	9606.ENSP00000412237	0	FALSE	interacts with	IL13 (interacts with) IL10
0.93	0.068	0.957	0.4	0	0	0	interacts with	IL13 (interacts with) TNF	0	9606.ENSP00000304915	9606.ENSP00000398698	0	FALSE	interacts with	IL13 (interacts with) TNF
0.929	0.061	0.957	0.4	0	0	0	interacts with	IL13 (interacts with) IL6	0	9606.ENSP00000304915	9606.ENSP00000385675	0	FALSE	interacts with	IL13 (interacts with) IL6
0.972	0	0.972	0	0	0	0	interacts with	IL17A (interacts with) CD4	0	9606.ENSP00000497968	9606.ENSP00000011653	0	FALSE	interacts with	IL17A (interacts with) CD4
0.542	0	0.713	0.4	0	0	0	interacts with	IL17A (interacts with) TIMP1	0	9606.ENSP00000497968	9606.ENSP00000218388	0	FALSE	interacts with	IL17A (interacts with) TIMP1
0.844	0.046	0.903	0.4	0	0	0	interacts with	IL17A (interacts with) TGFB1	0	9606.ENSP00000497968	9606.ENSP00000221930	0	FALSE	interacts with	IL17A (interacts with) TGFB1
0.907	0.258	0.928	0	0	0	0	interacts with	IL17A (interacts with) CSF3	0	9606.ENSP00000497968	9606.ENSP00000225474	0	FALSE	interacts with	IL17A (interacts with) CSF3
0.873	0.042	0.874	0	0	0	0	interacts with	IL17A (interacts with) CCL2	0	9606.ENSP00000497968	9606.ENSP00000225831	0	FALSE	interacts with	IL17A (interacts with) CCL2
0.789	0.051	0.791	0	0	0	0	interacts with	IL17A (interacts with) NFKB1	0	9606.ENSP00000497968	9606.ENSP00000226574	0	FALSE	interacts with	IL17A (interacts with) NFKB1
0.942	0.344	0.984	0	0.623	0	0	interacts with	IL17A (interacts with) IL2	0	9606.ENSP00000497968	9606.ENSP00000226730	0	FALSE	interacts with	IL17A (interacts with) IL2
0.975	0.134	0.978	0	0	0	0	interacts with	IL17A (interacts with) IFNG	0	9606.ENSP00000497968	9606.ENSP00000229135	0	FALSE	interacts with	IL17A (interacts with) IFNG
0.955	0.119	0.959	0	0	0	0	interacts with	IL17A (interacts with) IL4	0	9606.ENSP00000497968	9606.ENSP00000231449	0	FALSE	interacts with	IL17A (interacts with) IL4
0.933	0.126	0.939	0	0	0	0	interacts with	IL17A (interacts with) IL5	0	9606.ENSP00000497968	9606.ENSP00000231454	0	FALSE	interacts with	IL17A (interacts with) IL5
0.728	0.124	0.751	0	0	0	0	interacts with	IL17A (interacts with) CRP	0	9606.ENSP00000497968	9606.ENSP00000255030	0	FALSE	interacts with	IL17A (interacts with) CRP
0.766	0	0.766	0	0	0	0	interacts with	IL17A (interacts with) TLR2	0	9606.ENSP00000497968	9606.ENSP00000260010	0	FALSE	interacts with	IL17A (interacts with) TLR2
0.922	0.121	0.929	0	0	0	0	interacts with	IL17A (interacts with) IL1A	0	9606.ENSP00000497968	9606.ENSP00000263339	0	FALSE	interacts with	IL17A (interacts with) IL1A
0.96	0.094	0.962	0	0	0	0	interacts with	IL17A (interacts with) IL1B	0	9606.ENSP00000497968	9606.ENSP00000263341	0	FALSE	interacts with	IL17A (interacts with) IL1B
0.597	0	0.747	0.4	0	0	0	interacts with	IL17A (interacts with) FGF2	0	9606.ENSP00000497968	9606.ENSP00000264498	0	FALSE	interacts with	IL17A (interacts with) FGF2
0.886	0	0.944	0.5	0.104	0	0	interacts with	IL17A (interacts with) STAT3	0	9606.ENSP00000497968	9606.ENSP00000264657	0	FALSE	interacts with	IL17A (interacts with) STAT3
0.768	0.135	0.79	0	0	0	0	interacts with	IL17A (interacts with) IFNA1	0	9606.ENSP00000497968	9606.ENSP00000276927	0	FALSE	interacts with	IL17A (interacts with) IFNA1
0.83	0.067	0.835	0	0	0	0	interacts with	IL17A (interacts with) IL18	0	9606.ENSP00000497968	9606.ENSP00000280357	0	FALSE	interacts with	IL17A (interacts with) IL18
0.751	0.043	0.751	0	0	0	0	interacts with	IL17A (interacts with) CCR2	0	9606.ENSP00000497968	9606.ENSP00000292301	0	FALSE	interacts with	IL17A (interacts with) CCR2
0.881	0.101	0.888	0	0	0	0	interacts with	IL17A (interacts with) CSF2	0	9606.ENSP00000497968	9606.ENSP00000296871	0	FALSE	interacts with	IL17A (interacts with) CSF2
0.936	0.104	0.94	0	0	0	0	interacts with	IL17A (interacts with) IL13	0	9606.ENSP00000497968	9606.ENSP00000304915	0	FALSE	interacts with	IL17A (interacts with) IL13
0.845	0.071	0.85	0	0	0	0	interacts with	IL17A (interacts with) CXCL10	0	9606.ENSP00000497968	9606.ENSP00000305651	0	FALSE	interacts with	IL17A (interacts with) CXCL10
0.923	0.06	0.924	0	0	0	0	interacts with	IL17A (interacts with) CXCL8	0	9606.ENSP00000497968	9606.ENSP00000306512	0	FALSE	interacts with	IL17A (interacts with) CXCL8
0.523	0.076	0.712	0.4	0	0	0	interacts with	IL17A (interacts with) MMP1	0	9606.ENSP00000497968	9606.ENSP00000322788	0	FALSE	interacts with	IL17A (interacts with) MMP1
0.823	0.081	0.83	0	0	0	0	interacts with	IL17A (interacts with) CXCL9	0	9606.ENSP00000497968	9606.ENSP00000354901	0	FALSE	interacts with	IL17A (interacts with) CXCL9
0.694	0.069	0.814	0.4	0	0	0	interacts with	IL17A (interacts with) MMP9	0	9606.ENSP00000497968	9606.ENSP00000361405	0	FALSE	interacts with	IL17A (interacts with) MMP9
0.867	0	0.867	0	0	0	0	interacts with	IL17A (interacts with) TLR4	0	9606.ENSP00000497968	9606.ENSP00000363089	0	FALSE	interacts with	IL17A (interacts with) TLR4
0.948	0.125	0.953	0	0	0	0	interacts with	IL17A (interacts with) FOXP3	0	9606.ENSP00000497968	9606.ENSP00000365380	0	FALSE	interacts with	IL17A (interacts with) FOXP3
0.851	0.049	0.852	0	0	0	0	interacts with	IL17A (interacts with) IL33	0	9606.ENSP00000497968	9606.ENSP00000370842	0	FALSE	interacts with	IL17A (interacts with) IL33
0.968	0.073	0.98	0.4	0	0	0	interacts with	IL17A (interacts with) IL6	0	9606.ENSP00000497968	9606.ENSP00000385675	0	FALSE	interacts with	IL17A (interacts with) IL6
0.936	0	0.936	0	0	0	0	interacts with	IL17A (interacts with) CD8A	0	9606.ENSP00000497968	9606.ENSP00000386559	0	FALSE	interacts with	IL17A (interacts with) CD8A
0.957	0.068	0.958	0	0	0	0	interacts with	IL17A (interacts with) TNF	0	9606.ENSP00000497968	9606.ENSP00000398698	0	FALSE	interacts with	IL17A (interacts with) TNF
0.778	0.061	0.782	0	0	0	0	interacts with	IL17A (interacts with) PTPRC	0	9606.ENSP00000497968	9606.ENSP00000411355	0	FALSE	interacts with	IL17A (interacts with) PTPRC
0.965	0.119	0.98	0.4	0	0	0	interacts with	IL17A (interacts with) IL10	0	9606.ENSP00000497968	9606.ENSP00000412237	0	FALSE	interacts with	IL17A (interacts with) IL10
0.867	0	0.867	0	0	0	0	interacts with	IL17A (interacts with) ITGAX	0	9606.ENSP00000497968	9606.ENSP00000454623	0	FALSE	interacts with	IL17A (interacts with) ITGAX
0.849	0	0.849	0	0	0	0	interacts with	IL17A (interacts with) CCL5	0	9606.ENSP00000497968	9606.ENSP00000474412	0	FALSE	interacts with	IL17A (interacts with) CCL5
0.842	0.072	0.847	0	0	0	0	interacts with	IL17A (interacts with) CCL3	0	9606.ENSP00000497968	9606.ENSP00000477908	0	FALSE	interacts with	IL17A (interacts with) CCL3
0.82	0.049	0.822	0	0	0	0	interacts with	IL17A (interacts with) CCL4	0	9606.ENSP00000497968	9606.ENSP00000482259	0	FALSE	interacts with	IL17A (interacts with) CCL4
0.783	0.044	0.783	0	0	0	0	interacts with	IL17A (interacts with) ITGAM	0	9606.ENSP00000497968	9606.ENSP00000496959	0	FALSE	interacts with	IL17A (interacts with) ITGAM
0.849	0.042	0.849	0	0	0	0	interacts with	IL18 (interacts with) CD4	0	9606.ENSP00000280357	9606.ENSP00000011653	0	FALSE	interacts with	IL18 (interacts with) CD4
0.668	0	0.792	0.4	0	0	0	interacts with	IL18 (interacts with) CSF3	0	9606.ENSP00000280357	9606.ENSP00000225474	0	FALSE	interacts with	IL18 (interacts with) CSF3
0.808	0.047	0.881	0.4	0	0	0	interacts with	IL18 (interacts with) CCL2	0	9606.ENSP00000280357	9606.ENSP00000225831	0	FALSE	interacts with	IL18 (interacts with) CCL2
0.799	0.053	0.979	0.9	0	0	0	interacts with	IL18 (interacts with) NFKB1	0	9606.ENSP00000280357	9606.ENSP00000226574	0	FALSE	interacts with	IL18 (interacts with) NFKB1
0.815	0	0.815	0	0	0	0	interacts with	IL18 (interacts with) IL2	0	9606.ENSP00000280357	9606.ENSP00000226730	0	FALSE	interacts with	IL18 (interacts with) IL2
0.945	0.104	0.949	0	0	0	0	interacts with	IL18 (interacts with) IFNG	0	9606.ENSP00000280357	9606.ENSP00000229135	0	FALSE	interacts with	IL18 (interacts with) IFNG
0.836	0	0.897	0.4	0	0	0	interacts with	IL18 (interacts with) IL4	0	9606.ENSP00000280357	9606.ENSP00000231449	0	FALSE	interacts with	IL18 (interacts with) IL4
0.786	0	0.786	0	0	0	0	interacts with	IL18 (interacts with) IL5	0	9606.ENSP00000280357	9606.ENSP00000231454	0	FALSE	interacts with	IL18 (interacts with) IL5
0.835	0	0.835	0	0	0	0	interacts with	IL18 (interacts with) CRP	0	9606.ENSP00000280357	9606.ENSP00000255030	0	FALSE	interacts with	IL18 (interacts with) CRP
0.772	0.074	0.779	0	0	0	0	interacts with	IL18 (interacts with) IL1RN	0	9606.ENSP00000280357	9606.ENSP00000259206	0	FALSE	interacts with	IL18 (interacts with) IL1RN
0.84	0.082	0.847	0	0	0	0	interacts with	IL18 (interacts with) TLR2	0	9606.ENSP00000280357	9606.ENSP00000260010	0	FALSE	interacts with	IL18 (interacts with) TLR2
0.994	0.066	0.997	0.5	0	0	0	interacts with	IL18 (interacts with) IL1A	0	9606.ENSP00000280357	9606.ENSP00000263339	0	FALSE	interacts with	IL18 (interacts with) IL1A
0.972	0.095	0.99	0.5	0.312	0	0	interacts with	IL18 (interacts with) IL1B	0	9606.ENSP00000280357	9606.ENSP00000263341	0	FALSE	interacts with	IL18 (interacts with) IL1B
0.624	0.052	0.806	0.5	0	0	0	interacts with	IL18 (interacts with) STAT3	0	9606.ENSP00000280357	9606.ENSP00000264657	0	FALSE	interacts with	IL18 (interacts with) STAT3
0.849	0	0.849	0	0	0	0	interacts with	IL18 (interacts with) IFNA1	0	9606.ENSP00000280357	9606.ENSP00000276927	0	FALSE	interacts with	IL18 (interacts with) IFNA1
0.695	0.073	0.705	0	0	0	0	interacts with	IL18 (interacts with) CXCL9	0	9606.ENSP00000280357	9606.ENSP00000354901	0	FALSE	interacts with	IL18 (interacts with) CXCL9
0.709	0.059	0.714	0	0	0	0	interacts with	IL18 (interacts with) PTGS2	0	9606.ENSP00000280357	9606.ENSP00000356438	0	FALSE	interacts with	IL18 (interacts with) PTGS2
0.718	0	0.718	0	0	0	0	interacts with	IL18 (interacts with) CXCL12	0	9606.ENSP00000280357	9606.ENSP00000379140	0	FALSE	interacts with	IL18 (interacts with) CXCL12
0.721	0	0.721	0	0	0	0	interacts with	IL18 (interacts with) INS	0	9606.ENSP00000280357	9606.ENSP00000380432	0	FALSE	interacts with	IL18 (interacts with) INS
0.775	0.107	0.791	0	0	0	0	interacts with	IL18 (interacts with) CD8A	0	9606.ENSP00000280357	9606.ENSP00000386559	0	FALSE	interacts with	IL18 (interacts with) CD8A
0.723	0.055	0.829	0.4	0	0	0	interacts with	IL18 (interacts with) CCL4	0	9606.ENSP00000280357	9606.ENSP00000482259	0	FALSE	interacts with	IL18 (interacts with) CCL4
0.83	0.067	0.835	0	0	0	0	interacts with	IL18 (interacts with) IL17A	0	9606.ENSP00000280357	9606.ENSP00000497968	0	FALSE	interacts with	IL18 (interacts with) IL17A
0.769	0.054	0.858	0.4	0	0	0	interacts with	IL18 (interacts with) CCL5	0	9606.ENSP00000280357	9606.ENSP00000474412	0	FALSE	interacts with	IL18 (interacts with) CCL5
0.773	0.054	0.86	0.4	0	0	0	interacts with	IL18 (interacts with) CCL3	0	9606.ENSP00000280357	9606.ENSP00000477908	0	FALSE	interacts with	IL18 (interacts with) CCL3
0.773	0.069	0.862	0.4	0	0	0	interacts with	IL18 (interacts with) CXCL10	0	9606.ENSP00000280357	9606.ENSP00000305651	0	FALSE	interacts with	IL18 (interacts with) CXCL10
0.868	0.049	0.869	0	0	0	0	interacts with	IL18 (interacts with) IL33	0	9606.ENSP00000280357	9606.ENSP00000370842	0	FALSE	interacts with	IL18 (interacts with) IL33
0.835	0	0.897	0.4	0	0	0	interacts with	IL18 (interacts with) CSF2	0	9606.ENSP00000280357	9606.ENSP00000296871	0	FALSE	interacts with	IL18 (interacts with) CSF2
0.905	0.068	0.908	0	0	0	0	interacts with	IL18 (interacts with) TLR4	0	9606.ENSP00000280357	9606.ENSP00000363089	0	FALSE	interacts with	IL18 (interacts with) TLR4
0.867	0	0.916	0.4	0	0	0	interacts with	IL18 (interacts with) IL13	0	9606.ENSP00000280357	9606.ENSP00000304915	0	FALSE	interacts with	IL18 (interacts with) IL13
0.877	0.087	0.926	0.4	0	0	0	interacts with	IL18 (interacts with) CXCL8	0	9606.ENSP00000280357	9606.ENSP00000306512	0	FALSE	interacts with	IL18 (interacts with) CXCL8
0.945	0.062	0.946	0	0	0	0	interacts with	IL18 (interacts with) NLRP3	0	9606.ENSP00000280357	9606.ENSP00000337383	0	FALSE	interacts with	IL18 (interacts with) NLRP3
0.917	0.165	0.955	0.4	0	0	0	interacts with	IL18 (interacts with) IL10	0	9606.ENSP00000280357	9606.ENSP00000412237	0	FALSE	interacts with	IL18 (interacts with) IL10
0.937	0.049	0.961	0.4	0	0	0	interacts with	IL18 (interacts with) TNF	0	9606.ENSP00000280357	9606.ENSP00000398698	0	FALSE	interacts with	IL18 (interacts with) TNF
0.953	0	0.97	0.4	0	0	0	interacts with	IL18 (interacts with) IL6	0	9606.ENSP00000280357	9606.ENSP00000385675	0	FALSE	interacts with	IL18 (interacts with) IL6
0.979	0.105	0.998	0.9	0.292	0	0	interacts with	IL18 (interacts with) CASP1	0	9606.ENSP00000280357	9606.ENSP00000433138	0	FALSE	interacts with	IL18 (interacts with) CASP1
0.873	0.065	0.876	0	0	0	0	interacts with	IL1A (interacts with) CD4	0	9606.ENSP00000263339	9606.ENSP00000011653	0	FALSE	interacts with	IL1A (interacts with) CD4
0.763	0.047	0.764	0	0	0	0	interacts with	IL1A (interacts with) TGFB1	0	9606.ENSP00000263339	9606.ENSP00000221930	0	FALSE	interacts with	IL1A (interacts with) TGFB1
0.74	0	0.74	0	0	0	0	interacts with	IL1A (interacts with) HGF	0	9606.ENSP00000263339	9606.ENSP00000222390	0	FALSE	interacts with	IL1A (interacts with) HGF
0.729	0.145	0.758	0	0	0	0	interacts with	IL1A (interacts with) SERPINE1	0	9606.ENSP00000263339	9606.ENSP00000223095	0	FALSE	interacts with	IL1A (interacts with) SERPINE1
0.983	0.255	0.991	0.4	0	0	0	interacts with	IL1A (interacts with) CSF3	0	9606.ENSP00000263339	9606.ENSP00000225474	0	FALSE	interacts with	IL1A (interacts with) CSF3
0.882	0.144	0.934	0.4	0	0	0	interacts with	IL1A (interacts with) CCL2	0	9606.ENSP00000263339	9606.ENSP00000225831	0	FALSE	interacts with	IL1A (interacts with) CCL2
0.9	0.176	0.946	0.4	0	0	0	interacts with	IL1A (interacts with) NFKB1	0	9606.ENSP00000263339	9606.ENSP00000226574	0	FALSE	interacts with	IL1A (interacts with) NFKB1
0.997	0.111	0.997	0	0	0	0	interacts with	IL1A (interacts with) IL2	0	9606.ENSP00000263339	9606.ENSP00000226730	0	FALSE	interacts with	IL1A (interacts with) IL2
0.966	0.166	0.971	0	0	0	0	interacts with	IL1A (interacts with) IFNG	0	9606.ENSP00000263339	9606.ENSP00000229135	0	FALSE	interacts with	IL1A (interacts with) IFNG
0.992	0.111	0.995	0.4	0	0	0	interacts with	IL1A (interacts with) IL4	0	9606.ENSP00000263339	9606.ENSP00000231449	0	FALSE	interacts with	IL1A (interacts with) IL4
0.909	0.134	0.918	0	0	0	0	interacts with	IL1A (interacts with) IL5	0	9606.ENSP00000263339	9606.ENSP00000231454	0	FALSE	interacts with	IL1A (interacts with) IL5
0.811	0.099	0.822	0	0	0	0	interacts with	IL1A (interacts with) CRP	0	9606.ENSP00000263339	9606.ENSP00000255030	0	FALSE	interacts with	IL1A (interacts with) CRP
0.988	0.202	0.99	0	0	0	0	interacts with	IL1A (interacts with) IL1RN	0	9606.ENSP00000263339	9606.ENSP00000259206	0	FALSE	interacts with	IL1A (interacts with) IL1RN
0.864	0.081	0.87	0	0	0	0	interacts with	IL1A (interacts with) TLR2	0	9606.ENSP00000263339	9606.ENSP00000260010	0	FALSE	interacts with	IL1A (interacts with) TLR2
0.696	0.055	0.7	0	0	0	0	interacts with	IL1A (interacts with) ITGAM	0	9606.ENSP00000263339	9606.ENSP00000496959	0	FALSE	interacts with	IL1A (interacts with) ITGAM
0.701	0.043	0.701	0	0	0	0	interacts with	IL1A (interacts with) EGFR	0	9606.ENSP00000263339	9606.ENSP00000275493	0	FALSE	interacts with	IL1A (interacts with) EGFR
0.704	0	0.704	0	0	0	0	interacts with	IL1A (interacts with) CCR2	0	9606.ENSP00000263339	9606.ENSP00000292301	0	FALSE	interacts with	IL1A (interacts with) CCR2
0.697	0.109	0.718	0	0	0	0	interacts with	IL1A (interacts with) FGF2	0	9606.ENSP00000263339	9606.ENSP00000264498	0	FALSE	interacts with	IL1A (interacts with) FGF2
0.724	0.045	0.725	0	0	0	0	interacts with	IL1A (interacts with) CASP3	0	9606.ENSP00000263339	9606.ENSP00000311032	0	FALSE	interacts with	IL1A (interacts with) CASP3
0.722	0.067	0.73	0	0	0	0	interacts with	IL1A (interacts with) CXCL9	0	9606.ENSP00000263339	9606.ENSP00000354901	0	FALSE	interacts with	IL1A (interacts with) CXCL9
0.714	0.099	0.732	0	0	0	0	interacts with	IL1A (interacts with) INS	0	9606.ENSP00000263339	9606.ENSP00000380432	0	FALSE	interacts with	IL1A (interacts with) INS
0.72	0.08	0.734	0	0.051	0	0	interacts with	IL1A (interacts with) MMP9	0	9606.ENSP00000263339	9606.ENSP00000361405	0	FALSE	interacts with	IL1A (interacts with) MMP9
0.759	0.064	0.764	0	0	0	0	interacts with	IL1A (interacts with) PTPRC	0	9606.ENSP00000263339	9606.ENSP00000411355	0	FALSE	interacts with	IL1A (interacts with) PTPRC
0.768	0.055	0.773	0	0.051	0	0	interacts with	IL1A (interacts with) FN1	0	9606.ENSP00000263339	9606.ENSP00000346839	0	FALSE	interacts with	IL1A (interacts with) FN1
0.772	0.058	0.776	0	0	0	0	interacts with	IL1A (interacts with) IFNA1	0	9606.ENSP00000263339	9606.ENSP00000276927	0	FALSE	interacts with	IL1A (interacts with) IFNA1
0.777	0	0.777	0	0	0	0	interacts with	IL1A (interacts with) CD8A	0	9606.ENSP00000263339	9606.ENSP00000386559	0	FALSE	interacts with	IL1A (interacts with) CD8A
0.779	0.115	0.798	0	0.051	0	0	interacts with	IL1A (interacts with) MMP1	0	9606.ENSP00000263339	9606.ENSP00000322788	0	FALSE	interacts with	IL1A (interacts with) MMP1
0.781	0.155	0.807	0	0	0	0	interacts with	IL1A (interacts with) ICAM1	0	9606.ENSP00000263339	9606.ENSP00000264832	0	FALSE	interacts with	IL1A (interacts with) ICAM1
0.812	0.085	0.82	0	0	0	0	interacts with	IL1A (interacts with) IL33	0	9606.ENSP00000263339	9606.ENSP00000370842	0	FALSE	interacts with	IL1A (interacts with) IL33
0.741	0.346	0.823	0	0	0	0	interacts with	IL1A (interacts with) PTGS2	0	9606.ENSP00000263339	9606.ENSP00000356438	0	FALSE	interacts with	IL1A (interacts with) PTGS2
0.808	0.129	0.826	0	0	0	0	interacts with	IL1A (interacts with) CSF1	0	9606.ENSP00000263339	9606.ENSP00000327513	0	FALSE	interacts with	IL1A (interacts with) CSF1
0.835	0.102	0.845	0	0	0	0	interacts with	IL1A (interacts with) NLRP3	0	9606.ENSP00000263339	9606.ENSP00000337383	0	FALSE	interacts with	IL1A (interacts with) NLRP3
0.722	0.083	0.861	0.5	0	0	0	interacts with	IL1A (interacts with) STAT3	0	9606.ENSP00000263339	9606.ENSP00000264657	0	FALSE	interacts with	IL1A (interacts with) STAT3
0.898	0	0.898	0	0	0	0	interacts with	IL1A (interacts with) HMGB1	0	9606.ENSP00000263339	9606.ENSP00000345347	0	FALSE	interacts with	IL1A (interacts with) HMGB1
0.832	0.087	0.9	0.4	0	0	0	interacts with	IL1A (interacts with) CCL5	0	9606.ENSP00000263339	9606.ENSP00000474412	0	FALSE	interacts with	IL1A (interacts with) CCL5
0.862	0.124	0.921	0.4	0	0	0	interacts with	IL1A (interacts with) CCL4	0	9606.ENSP00000263339	9606.ENSP00000482259	0	FALSE	interacts with	IL1A (interacts with) CCL4
0.841	0.259	0.923	0.4	0	0	0	interacts with	IL1A (interacts with) CCL3	0	9606.ENSP00000263339	9606.ENSP00000477908	0	FALSE	interacts with	IL1A (interacts with) CCL3
0.922	0.121	0.929	0	0	0	0	interacts with	IL1A (interacts with) IL17A	0	9606.ENSP00000263339	9606.ENSP00000497968	0	FALSE	interacts with	IL1A (interacts with) IL17A
0.9	0.123	0.943	0.4	0	0	0	interacts with	IL1A (interacts with) IL13	0	9606.ENSP00000263339	9606.ENSP00000304915	0	FALSE	interacts with	IL1A (interacts with) IL13
0.925	0.146	0.958	0.4	0	0	0	interacts with	IL1A (interacts with) CXCL10	0	9606.ENSP00000263339	9606.ENSP00000305651	0	FALSE	interacts with	IL1A (interacts with) CXCL10
0.912	0.107	0.968	0.5	0.292	0	0	interacts with	IL1A (interacts with) CASP1	0	9606.ENSP00000263339	9606.ENSP00000433138	0	FALSE	interacts with	IL1A (interacts with) CASP1
0.944	0.209	0.971	0.4	0	0	0	interacts with	IL1A (interacts with) IL10	0	9606.ENSP00000263339	9606.ENSP00000412237	0	FALSE	interacts with	IL1A (interacts with) IL10
0.972	0.086	0.974	0	0	0	0	interacts with	IL1A (interacts with) TLR4	0	9606.ENSP00000263339	9606.ENSP00000363089	0	FALSE	interacts with	IL1A (interacts with) TLR4
0.928	0.451	0.974	0.4	0	0	0	interacts with	IL1A (interacts with) CXCL8	0	9606.ENSP00000263339	9606.ENSP00000306512	0	FALSE	interacts with	IL1A (interacts with) CXCL8
0.974	0.376	0.989	0.4	0	0	0	interacts with	IL1A (interacts with) IL6	0	9606.ENSP00000263339	9606.ENSP00000385675	0	FALSE	interacts with	IL1A (interacts with) IL6
0.976	0.619	0.994	0.4	0	0	0	interacts with	IL1A (interacts with) TNF	0	9606.ENSP00000263339	9606.ENSP00000398698	0	FALSE	interacts with	IL1A (interacts with) TNF
0.994	0.066	0.997	0.5	0	0	0	interacts with	IL1A (interacts with) IL18	0	9606.ENSP00000263339	9606.ENSP00000280357	0	FALSE	interacts with	IL1A (interacts with) IL18
0.992	0.523	0.997	0.4	0	0	0	interacts with	IL1A (interacts with) CSF2	0	9606.ENSP00000263339	9606.ENSP00000296871	0	FALSE	interacts with	IL1A (interacts with) CSF2
0.983	0.961	0.999	0.9	0	0	0	interacts with	IL1A (interacts with) IL1B	0	9606.ENSP00000263339	9606.ENSP00000263341	0	FALSE	interacts with	IL1A (interacts with) IL1B
0.944	0.108	0.958	0	0	0	0	interacts with	IL1B (interacts with) CD4	0	9606.ENSP00000263341	9606.ENSP00000011653	0.238	FALSE	interacts with	IL1B (interacts with) CD4
0.761	0.164	0.791	0	0	0	0	interacts with	IL1B (interacts with) TIMP1	0	9606.ENSP00000263341	9606.ENSP00000218388	0	FALSE	interacts with	IL1B (interacts with) TIMP1
0.721	0.079	0.745	0	0.087	0	0	interacts with	IL1B (interacts with) MMP2	0	9606.ENSP00000263341	9606.ENSP00000219070	0	FALSE	interacts with	IL1B (interacts with) MMP2
0.924	0.14	0.932	0	0	0	0	interacts with	IL1B (interacts with) TGFB1	0	9606.ENSP00000263341	9606.ENSP00000221930	0	FALSE	interacts with	IL1B (interacts with) TGFB1
0.721	0.125	0.746	0	0	0	0	interacts with	IL1B (interacts with) SERPINE1	0	9606.ENSP00000263341	9606.ENSP00000223095	0	FALSE	interacts with	IL1B (interacts with) SERPINE1
0.993	0.239	0.996	0.4	0	0	0	interacts with	IL1B (interacts with) CSF3	0	9606.ENSP00000263341	9606.ENSP00000225474	0	FALSE	interacts with	IL1B (interacts with) CSF3
0.94	0.239	0.97	0.4	0	0	0	interacts with	IL1B (interacts with) CCL2	0	9606.ENSP00000263341	9606.ENSP00000225831	0	FALSE	interacts with	IL1B (interacts with) CCL2
0.959	0.2	0.996	0.9	0	0	0	interacts with	IL1B (interacts with) NFKB1	0	9606.ENSP00000263341	9606.ENSP00000226574	0	FALSE	interacts with	IL1B (interacts with) NFKB1
0.999	0.073	0.999	0	0	0	0	interacts with	IL1B (interacts with) IL2	0	9606.ENSP00000263341	9606.ENSP00000226730	0	FALSE	interacts with	IL1B (interacts with) IL2
0.997	0.273	0.998	0	0	0	0	interacts with	IL1B (interacts with) IFNG	0	9606.ENSP00000263341	9606.ENSP00000229135	0	FALSE	interacts with	IL1B (interacts with) IFNG
0.779	0.052	0.782	0	0	0	0	interacts with	IL1B (interacts with) MAPK14	0	9606.ENSP00000263341	9606.ENSP00000229795	0	FALSE	interacts with	IL1B (interacts with) MAPK14
0.998	0.072	0.998	0.4	0	0	0	interacts with	IL1B (interacts with) IL4	0	9606.ENSP00000263341	9606.ENSP00000231449	0	FALSE	interacts with	IL1B (interacts with) IL4
0.998	0.104	0.998	0	0	0	0	interacts with	IL1B (interacts with) IL5	0	9606.ENSP00000263341	9606.ENSP00000231454	0	FALSE	interacts with	IL1B (interacts with) IL5
0.816	0.168	0.84	0	0	0	0	interacts with	IL1B (interacts with) CD68	0	9606.ENSP00000263341	9606.ENSP00000250092	0	FALSE	interacts with	IL1B (interacts with) CD68
0.883	0.067	0.886	0	0	0	0	interacts with	IL1B (interacts with) CRP	0	9606.ENSP00000263341	9606.ENSP00000255030	0	FALSE	interacts with	IL1B (interacts with) CRP
0.952	0.377	0.968	0	0	0	0.651	interacts with	IL1B (interacts with) IL1RN	0	9606.ENSP00000263341	9606.ENSP00000259206	0	FALSE	interacts with	IL1B (interacts with) IL1RN
0.96	0.259	0.969	0	0	0	0	interacts with	IL1B (interacts with) TLR2	0	9606.ENSP00000263341	9606.ENSP00000260010	0	FALSE	interacts with	IL1B (interacts with) TLR2
0.724	0.093	0.742	0	0.051	0	0	interacts with	IL1B (interacts with) MMP7	0	9606.ENSP00000263341	9606.ENSP00000260227	0	FALSE	interacts with	IL1B (interacts with) MMP7
0.983	0.961	0.999	0.9	0	0	0	interacts with	IL1B (interacts with) IL1A	0	9606.ENSP00000263341	9606.ENSP00000263339	0	FALSE	interacts with	IL1B (interacts with) IL1A
0.718	0	0.718	0	0	0	0	interacts with	IL1B (interacts with) TP53	0	9606.ENSP00000263341	9606.ENSP00000269305	0	FALSE	interacts with	IL1B (interacts with) TP53
0.726	0.08	0.737	0	0	0	0	interacts with	IL1B (interacts with) CX3CR1	0	9606.ENSP00000263341	9606.ENSP00000351059	0	FALSE	interacts with	IL1B (interacts with) CX3CR1
0.745	0	0.745	0	0	0	0	interacts with	IL1B (interacts with) CTNNB1	0	9606.ENSP00000263341	9606.ENSP00000495360	0	FALSE	interacts with	IL1B (interacts with) CTNNB1
0.721	0.126	0.745	0	0	0	0	interacts with	IL1B (interacts with) CCL18	0	9606.ENSP00000263341	9606.ENSP00000479955	0	FALSE	interacts with	IL1B (interacts with) CCL18
0.742	0.087	0.755	0	0	0	0	interacts with	IL1B (interacts with) CXCL12	0	9606.ENSP00000263341	9606.ENSP00000379140	0	FALSE	interacts with	IL1B (interacts with) CXCL12
0.729	0.12	0.759	0	0.071	0	0	interacts with	IL1B (interacts with) MMP12	0	9606.ENSP00000263341	9606.ENSP00000458585	0	FALSE	interacts with	IL1B (interacts with) MMP12
0.751	0.12	0.771	0	0	0	0	interacts with	IL1B (interacts with) HIF1A	0	9606.ENSP00000263341	9606.ENSP00000437955	0	FALSE	interacts with	IL1B (interacts with) HIF1A
0.79	0.084	0.8	0	0	0	0	interacts with	IL1B (interacts with) ARG1	0	9606.ENSP00000263341	9606.ENSP00000349446	0	FALSE	interacts with	IL1B (interacts with) ARG1
0.799	0.049	0.8	0	0	0	0	interacts with	IL1B (interacts with) FASLG	0	9606.ENSP00000263341	9606.ENSP00000356694	0	FALSE	interacts with	IL1B (interacts with) FASLG
0.796	0.073	0.803	0	0	0	0	interacts with	IL1B (interacts with) NOS2	0	9606.ENSP00000263341	9606.ENSP00000327251	0	FALSE	interacts with	IL1B (interacts with) NOS2
0.784	0.126	0.803	0	0	0	0	interacts with	IL1B (interacts with) EDN1	0	9606.ENSP00000263341	9606.ENSP00000368683	0	FALSE	interacts with	IL1B (interacts with) EDN1
0.775	0.168	0.805	0	0	0	0	interacts with	IL1B (interacts with) ITGAX	0	9606.ENSP00000263341	9606.ENSP00000454623	0	FALSE	interacts with	IL1B (interacts with) ITGAX
0.77	0.197	0.807	0	0	0	0	interacts with	IL1B (interacts with) PTPRC	0	9606.ENSP00000263341	9606.ENSP00000411355	0	FALSE	interacts with	IL1B (interacts with) PTPRC
0.805	0.055	0.808	0	0	0	0	interacts with	IL1B (interacts with) BCL2	0	9606.ENSP00000263341	9606.ENSP00000381185	0	FALSE	interacts with	IL1B (interacts with) BCL2
0.793	0.12	0.81	0	0	0	0	interacts with	IL1B (interacts with) CSF1	0	9606.ENSP00000263341	9606.ENSP00000327513	0	FALSE	interacts with	IL1B (interacts with) CSF1
0.79	0.143	0.812	0	0	0	0	interacts with	IL1B (interacts with) MRC1	0	9606.ENSP00000263341	9606.ENSP00000455897	0	FALSE	interacts with	IL1B (interacts with) MRC1
0.82	0.149	0.84	0	0	0	0	interacts with	IL1B (interacts with) CD163	0	9606.ENSP00000263341	9606.ENSP00000352071	0	FALSE	interacts with	IL1B (interacts with) CD163
0.843	0	0.843	0	0	0	0	interacts with	IL1B (interacts with) FOXP3	0	9606.ENSP00000263341	9606.ENSP00000365380	0	FALSE	interacts with	IL1B (interacts with) FOXP3
0.845	0	0.845	0	0	0	0	interacts with	IL1B (interacts with) MAPK8	0	9606.ENSP00000263341	9606.ENSP00000378974	0	FALSE	interacts with	IL1B (interacts with) MAPK8
0.847	0	0.847	0	0	0	0	interacts with	IL1B (interacts with) IGF1	0	9606.ENSP00000263341	9606.ENSP00000376637	0	FALSE	interacts with	IL1B (interacts with) IGF1
0.847	0.055	0.849	0	0	0	0	interacts with	IL1B (interacts with) IFNA1	0	9606.ENSP00000263341	9606.ENSP00000276927	0	FALSE	interacts with	IL1B (interacts with) IFNA1
0.825	0.194	0.853	0	0	0	0	interacts with	IL1B (interacts with) ITGAM	0	9606.ENSP00000263341	9606.ENSP00000496959	0	FALSE	interacts with	IL1B (interacts with) ITGAM
0.838	0.141	0.855	0	0	0	0	interacts with	IL1B (interacts with) CXCL9	0	9606.ENSP00000263341	9606.ENSP00000354901	0	FALSE	interacts with	IL1B (interacts with) CXCL9
0.848	0.104	0.858	0	0	0	0	interacts with	IL1B (interacts with) PPARG	0	9606.ENSP00000263341	9606.ENSP00000287820	0	FALSE	interacts with	IL1B (interacts with) PPARG
0.864	0	0.864	0	0	0	0	interacts with	IL1B (interacts with) AKT1	0	9606.ENSP00000263341	9606.ENSP00000451828	0	FALSE	interacts with	IL1B (interacts with) AKT1
0.852	0.134	0.867	0	0	0	0	interacts with	IL1B (interacts with) CCR2	0	9606.ENSP00000263341	9606.ENSP00000292301	0	FALSE	interacts with	IL1B (interacts with) CCR2
0.866	0.055	0.869	0	0.051	0	0	interacts with	IL1B (interacts with) FN1	0	9606.ENSP00000263341	9606.ENSP00000346839	0	FALSE	interacts with	IL1B (interacts with) FN1
0.872	0	0.872	0	0	0	0	interacts with	IL1B (interacts with) GAPDH	0	9606.ENSP00000263341	9606.ENSP00000380070	0	FALSE	interacts with	IL1B (interacts with) GAPDH
0.849	0.174	0.873	0	0.07	0	0	interacts with	IL1B (interacts with) MMP1	0	9606.ENSP00000263341	9606.ENSP00000322788	0	FALSE	interacts with	IL1B (interacts with) MMP1
0.873	0	0.873	0	0	0	0	interacts with	IL1B (interacts with) EGFR	0	9606.ENSP00000263341	9606.ENSP00000275493	0	FALSE	interacts with	IL1B (interacts with) EGFR
0.886	0.078	0.89	0	0	0	0	interacts with	IL1B (interacts with) IL33	0	9606.ENSP00000263341	9606.ENSP00000370842	0	FALSE	interacts with	IL1B (interacts with) IL33
0.893	0.068	0.896	0	0	0	0	interacts with	IL1B (interacts with) INS	0	9606.ENSP00000263341	9606.ENSP00000380432	0	FALSE	interacts with	IL1B (interacts with) INS
0.892	0.076	0.896	0	0	0	0	interacts with	IL1B (interacts with) FGF2	0	9606.ENSP00000263341	9606.ENSP00000264498	0	FALSE	interacts with	IL1B (interacts with) FGF2
0.898	0.045	0.899	0	0	0	0	interacts with	IL1B (interacts with) CASP3	0	9606.ENSP00000263341	9606.ENSP00000311032	0	FALSE	interacts with	IL1B (interacts with) CASP3
0.885	0.271	0.912	0	0	0	0	interacts with	IL1B (interacts with) ICAM1	0	9606.ENSP00000263341	9606.ENSP00000264832	0	FALSE	interacts with	IL1B (interacts with) ICAM1
0.92	0.06	0.922	0	0	0	0	interacts with	IL1B (interacts with) CD8A	0	9606.ENSP00000263341	9606.ENSP00000386559	0	FALSE	interacts with	IL1B (interacts with) CD8A
0.877	0.069	0.938	0.5	0	0	0	interacts with	IL1B (interacts with) STAT3	0	9606.ENSP00000263341	9606.ENSP00000264657	0	FALSE	interacts with	IL1B (interacts with) STAT3
0.888	0.148	0.938	0.4	0	0	0	interacts with	IL1B (interacts with) CCL5	0	9606.ENSP00000263341	9606.ENSP00000474412	0	FALSE	interacts with	IL1B (interacts with) CCL5
0.872	0.292	0.94	0.4	0	0	0	interacts with	IL1B (interacts with) CCL4	0	9606.ENSP00000263341	9606.ENSP00000482259	0	FALSE	interacts with	IL1B (interacts with) CCL4
0.932	0.275	0.949	0	0.051	0	0	interacts with	IL1B (interacts with) MMP9	0	9606.ENSP00000263341	9606.ENSP00000361405	0	FALSE	interacts with	IL1B (interacts with) MMP9
0.922	0.087	0.953	0.4	0	0	0	interacts with	IL1B (interacts with) IL13	0	9606.ENSP00000263341	9606.ENSP00000304915	0	FALSE	interacts with	IL1B (interacts with) IL13
0.96	0.094	0.962	0	0	0	0	interacts with	IL1B (interacts with) IL17A	0	9606.ENSP00000263341	9606.ENSP00000497968	0	FALSE	interacts with	IL1B (interacts with) IL17A
0.925	0.229	0.962	0.4	0	0	0	interacts with	IL1B (interacts with) CXCL10	0	9606.ENSP00000263341	9606.ENSP00000305651	0	FALSE	interacts with	IL1B (interacts with) CXCL10
0.959	0	0.97	0	0.292	0	0	interacts with	IL1B (interacts with) HMGB1	0	9606.ENSP00000263341	9606.ENSP00000345347	0	FALSE	interacts with	IL1B (interacts with) HMGB1
0.883	0.64	0.972	0.4	0	0	0	interacts with	IL1B (interacts with) CCL3	0	9606.ENSP00000263341	9606.ENSP00000477908	0	FALSE	interacts with	IL1B (interacts with) CCL3
0.928	0.656	0.974	0	0	0	0	interacts with	IL1B (interacts with) PTGS2	0	9606.ENSP00000263341	9606.ENSP00000356438	0	FALSE	interacts with	IL1B (interacts with) PTGS2
0.984	0.181	0.986	0	0	0	0	interacts with	IL1B (interacts with) TLR4	0	9606.ENSP00000263341	9606.ENSP00000363089	0	FALSE	interacts with	IL1B (interacts with) TLR4
0.972	0.095	0.99	0.5	0.312	0	0	interacts with	IL1B (interacts with) IL18	0	9606.ENSP00000263341	9606.ENSP00000280357	0	FALSE	interacts with	IL1B (interacts with) IL18
0.978	0.409	0.991	0.4	0	0	0	interacts with	IL1B (interacts with) IL10	0	9606.ENSP00000263341	9606.ENSP00000412237	0	FALSE	interacts with	IL1B (interacts with) IL10
0.962	0.776	0.994	0.4	0	0	0	interacts with	IL1B (interacts with) CXCL8	0	9606.ENSP00000263341	9606.ENSP00000306512	0	FALSE	interacts with	IL1B (interacts with) CXCL8
0.989	0.515	0.996	0.4	0	0	0	interacts with	IL1B (interacts with) IL6	0	9606.ENSP00000263341	9606.ENSP00000385675	0	FALSE	interacts with	IL1B (interacts with) IL6
0.947	0.339	0.997	0.9	0.312	0	0	interacts with	IL1B (interacts with) NLRP3	0	9606.ENSP00000263341	9606.ENSP00000337383	0	FALSE	interacts with	IL1B (interacts with) NLRP3
0.993	0.616	0.998	0.4	0	0	0	interacts with	IL1B (interacts with) TNF	0	9606.ENSP00000263341	9606.ENSP00000398698	0	FALSE	interacts with	IL1B (interacts with) TNF
0.996	0.31	0.998	0.4	0	0	0	interacts with	IL1B (interacts with) CSF2	0	9606.ENSP00000263341	9606.ENSP00000296871	0	FALSE	interacts with	IL1B (interacts with) CSF2
0.987	0.265	0.999	0.9	0.787	0	0	interacts with	IL1B (interacts with) CASP1	0	9606.ENSP00000263341	9606.ENSP00000433138	0	FALSE	interacts with	IL1B (interacts with) CASP1
0.676	0.292	0.761	0	0	0	0	interacts with	IL1RN (interacts with) CCL2	0	9606.ENSP00000259206	9606.ENSP00000225831	0	FALSE	interacts with	IL1RN (interacts with) CCL2
0.74	0.042	0.74	0	0	0	0	interacts with	IL1RN (interacts with) IL4	0	9606.ENSP00000259206	9606.ENSP00000231449	0	FALSE	interacts with	IL1RN (interacts with) IL4
0.867	0.052	0.868	0	0	0	0	interacts with	IL1RN (interacts with) CRP	0	9606.ENSP00000259206	9606.ENSP00000255030	0	FALSE	interacts with	IL1RN (interacts with) CRP
0.373	0.123	0.701	0.5	0	0	0	interacts with	IL1RN (interacts with) STAT3	0	9606.ENSP00000259206	9606.ENSP00000264657	0	FALSE	interacts with	IL1RN (interacts with) STAT3
0.66	0.158	0.701	0	0	0	0	interacts with	IL1RN (interacts with) CXCL9	0	9606.ENSP00000259206	9606.ENSP00000354901	0	FALSE	interacts with	IL1RN (interacts with) CXCL9
0.702	0.042	0.702	0	0	0	0	interacts with	IL1RN (interacts with) IL13	0	9606.ENSP00000259206	9606.ENSP00000304915	0	FALSE	interacts with	IL1RN (interacts with) IL13
0.722	0.129	0.747	0	0	0	0	interacts with	IL1RN (interacts with) CCL5	0	9606.ENSP00000259206	9606.ENSP00000474412	0	FALSE	interacts with	IL1RN (interacts with) CCL5
0.713	0.171	0.752	0	0	0	0	interacts with	IL1RN (interacts with) TLR4	0	9606.ENSP00000259206	9606.ENSP00000363089	0	FALSE	interacts with	IL1RN (interacts with) TLR4
0.772	0.074	0.779	0	0	0	0	interacts with	IL1RN (interacts with) IL18	0	9606.ENSP00000259206	9606.ENSP00000280357	0	FALSE	interacts with	IL1RN (interacts with) IL18
0.738	0.204	0.782	0	0	0	0	interacts with	IL1RN (interacts with) CCL3	0	9606.ENSP00000259206	9606.ENSP00000477908	0	FALSE	interacts with	IL1RN (interacts with) CCL3
0.757	0.158	0.786	0	0	0	0	interacts with	IL1RN (interacts with) NLRP3	0	9606.ENSP00000259206	9606.ENSP00000337383	0	FALSE	interacts with	IL1RN (interacts with) NLRP3
0.751	0.207	0.794	0	0	0	0	interacts with	IL1RN (interacts with) CASP1	0	9606.ENSP00000259206	9606.ENSP00000433138	0	FALSE	interacts with	IL1RN (interacts with) CASP1
0.813	0.204	0.844	0	0	0	0	interacts with	IL1RN (interacts with) TNF	0	9606.ENSP00000259206	9606.ENSP00000398698	0	FALSE	interacts with	IL1RN (interacts with) TNF
0.874	0.072	0.923	0.4	0	0	0	interacts with	IL1RN (interacts with) IL10	0	9606.ENSP00000259206	9606.ENSP00000412237	0	FALSE	interacts with	IL1RN (interacts with) IL10
0.913	0.17	0.925	0	0	0	0	interacts with	IL1RN (interacts with) IL6	0	9606.ENSP00000259206	9606.ENSP00000385675	0	FALSE	interacts with	IL1RN (interacts with) IL6
0.897	0.319	0.926	0	0	0	0	interacts with	IL1RN (interacts with) CXCL8	0	9606.ENSP00000259206	9606.ENSP00000306512	0	FALSE	interacts with	IL1RN (interacts with) CXCL8
0.952	0.377	0.968	0	0	0	0.651	interacts with	IL1RN (interacts with) IL1B	0	9606.ENSP00000259206	9606.ENSP00000263341	0	FALSE	interacts with	IL1RN (interacts with) IL1B
0.988	0.202	0.99	0	0	0	0	interacts with	IL1RN (interacts with) IL1A	0	9606.ENSP00000259206	9606.ENSP00000263339	0	FALSE	interacts with	IL1RN (interacts with) IL1A
0.975	0.052	0.975	0	0	0	0	interacts with	IL2 (interacts with) CD4	0	9606.ENSP00000226730	9606.ENSP00000011653	0	FALSE	interacts with	IL2 (interacts with) CD4
0.715	0.128	0.741	0	0	0	0	interacts with	IL2 (interacts with) CCL17	0	9606.ENSP00000226730	9606.ENSP00000219244	0	FALSE	interacts with	IL2 (interacts with) CCL17
0.763	0	0.763	0	0	0	0	interacts with	IL2 (interacts with) TGFB1	0	9606.ENSP00000226730	9606.ENSP00000221930	0	FALSE	interacts with	IL2 (interacts with) TGFB1
0.96	0.106	0.962	0	0	0	0	interacts with	IL2 (interacts with) CSF3	0	9606.ENSP00000226730	9606.ENSP00000225474	0	FALSE	interacts with	IL2 (interacts with) CSF3
0.852	0.049	0.853	0	0	0	0	interacts with	IL2 (interacts with) CCL2	0	9606.ENSP00000226730	9606.ENSP00000225831	0	FALSE	interacts with	IL2 (interacts with) CCL2
0.8	0.055	0.804	0	0.046	0	0	interacts with	IL2 (interacts with) NFKB1	0	9606.ENSP00000226730	9606.ENSP00000226574	0	FALSE	interacts with	IL2 (interacts with) NFKB1
0.721	0	0.721	0	0	0	0	interacts with	IL2 (interacts with) ITGAM	0	9606.ENSP00000226730	9606.ENSP00000496959	0	FALSE	interacts with	IL2 (interacts with) ITGAM
0.729	0.043	0.729	0	0	0	0	interacts with	IL2 (interacts with) ITGAX	0	9606.ENSP00000226730	9606.ENSP00000454623	0	FALSE	interacts with	IL2 (interacts with) ITGAX
0.731	0	0.731	0	0	0	0	interacts with	IL2 (interacts with) TLR4	0	9606.ENSP00000226730	9606.ENSP00000363089	0	FALSE	interacts with	IL2 (interacts with) TLR4
0.722	0.087	0.735	0	0	0	0	interacts with	IL2 (interacts with) INS	0	9606.ENSP00000226730	9606.ENSP00000380432	0	FALSE	interacts with	IL2 (interacts with) INS
0.727	0.083	0.738	0	0	0	0	interacts with	IL2 (interacts with) CXCL9	0	9606.ENSP00000226730	9606.ENSP00000354901	0	FALSE	interacts with	IL2 (interacts with) CXCL9
0.74	0	0.74	0	0	0	0	interacts with	IL2 (interacts with) FGF2	0	9606.ENSP00000226730	9606.ENSP00000264498	0	FALSE	interacts with	IL2 (interacts with) FGF2
0.741	0	0.741	0	0	0	0	interacts with	IL2 (interacts with) TP53	0	9606.ENSP00000226730	9606.ENSP00000269305	0	FALSE	interacts with	IL2 (interacts with) TP53
0.736	0.092	0.751	0	0	0	0	interacts with	IL2 (interacts with) CCR2	0	9606.ENSP00000226730	9606.ENSP00000292301	0	FALSE	interacts with	IL2 (interacts with) CCR2
0.758	0.044	0.758	0	0	0	0	interacts with	IL2 (interacts with) BCL2	0	9606.ENSP00000226730	9606.ENSP00000381185	0	FALSE	interacts with	IL2 (interacts with) BCL2
0.764	0.1	0.778	0	0	0	0	interacts with	IL2 (interacts with) CRP	0	9606.ENSP00000226730	9606.ENSP00000255030	0	FALSE	interacts with	IL2 (interacts with) CRP
0.793	0.044	0.794	0	0	0	0	interacts with	IL2 (interacts with) PTPRC	0	9606.ENSP00000226730	9606.ENSP00000411355	0	FALSE	interacts with	IL2 (interacts with) PTPRC
0.799	0.049	0.8	0	0	0	0	interacts with	IL2 (interacts with) ICAM1	0	9606.ENSP00000226730	9606.ENSP00000264832	0	FALSE	interacts with	IL2 (interacts with) ICAM1
0.802	0.053	0.804	0	0	0	0	interacts with	IL2 (interacts with) FN1	0	9606.ENSP00000226730	9606.ENSP00000346839	0	FALSE	interacts with	IL2 (interacts with) FN1
0.794	0.086	0.813	0	0.049	0	0	interacts with	IL2 (interacts with) GAPDH		9606.ENSP00000226730	9606.ENSP00000380070	0	FALSE	interacts with	IL2 (interacts with) GAPDH
0.812	0.044	0.813	0	0	0	0	interacts with	IL2 (interacts with) CCL5	0	9606.ENSP00000226730	9606.ENSP00000474412	0	FALSE	interacts with	IL2 (interacts with) CCL5
0.815	0	0.815	0	0	0	0	interacts with	IL2 (interacts with) IL18	0	9606.ENSP00000226730	9606.ENSP00000280357	0	FALSE	interacts with	IL2 (interacts with) IL18
0.819	0.068	0.824	0	0	0	0	interacts with	IL2 (interacts with) CCL4	0	9606.ENSP00000226730	9606.ENSP00000482259	0	FALSE	interacts with	IL2 (interacts with) CCL4
0.806	0.13	0.824	0	0	0	0	interacts with	IL2 (interacts with) FASLG	0	9606.ENSP00000226730	9606.ENSP00000356694	0	FALSE	interacts with	IL2 (interacts with) FASLG
0.825	0.043	0.825	0	0	0	0	interacts with	IL2 (interacts with) IL33	0	9606.ENSP00000226730	9606.ENSP00000370842	0	FALSE	interacts with	IL2 (interacts with) IL33
0.826	0.056	0.828	0	0	0	0	interacts with	IL2 (interacts with) STAT3	0	9606.ENSP00000226730	9606.ENSP00000264657	0	FALSE	interacts with	IL2 (interacts with) STAT3
0.593	0	0.851	0.65	0	0	0	interacts with	IL2 (interacts with) EGFR	0	9606.ENSP00000226730	9606.ENSP00000275493	0	FALSE	interacts with	IL2 (interacts with) EGFR
0.852	0.072	0.857	0	0	0	0	interacts with	IL2 (interacts with) CXCL10	0	9606.ENSP00000226730	9606.ENSP00000305651	0	FALSE	interacts with	IL2 (interacts with) CXCL10
0.87	0.089	0.876	0	0	0	0	interacts with	IL2 (interacts with) CCL3	0	9606.ENSP00000226730	9606.ENSP00000477908	0	FALSE	interacts with	IL2 (interacts with) CCL3
0.876	0.083	0.881	0	0	0	0	interacts with	IL2 (interacts with) IFNA1	0	9606.ENSP00000226730	9606.ENSP00000276927	0	FALSE	interacts with	IL2 (interacts with) IFNA1
0.922	0.2	0.934	0	0	0	0	interacts with	IL2 (interacts with) IL13	0	9606.ENSP00000226730	9606.ENSP00000304915	0	FALSE	interacts with	IL2 (interacts with) IL13
0.955	0.072	0.957	0	0	0	0	interacts with	IL2 (interacts with) TNF	0	9606.ENSP00000226730	9606.ENSP00000398698	0	FALSE	interacts with	IL2 (interacts with) TNF
0.963	0.056	0.964	0	0	0	0	interacts with	IL2 (interacts with) IL10	0	9606.ENSP00000226730	9606.ENSP00000412237	0	FALSE	interacts with	IL2 (interacts with) IL10
0.971	0.056	0.971	0	0	0	0	interacts with	IL2 (interacts with) CD8A	0	9606.ENSP00000226730	9606.ENSP00000386559	0	FALSE	interacts with	IL2 (interacts with) CD8A
0.942	0.344	0.984	0	0.623	0	0	interacts with	IL2 (interacts with) IL17A	0	9606.ENSP00000226730	9606.ENSP00000497968	0	FALSE	interacts with	IL2 (interacts with) IL17A
0.985	0.048	0.985	0	0	0	0	interacts with	IL2 (interacts with) CXCL8	0	9606.ENSP00000226730	9606.ENSP00000306512	0	FALSE	interacts with	IL2 (interacts with) CXCL8
0.987	0.295	0.99	0	0	0	0	interacts with	IL2 (interacts with) IFNG	0	9606.ENSP00000226730	9606.ENSP00000229135	0	FALSE	interacts with	IL2 (interacts with) IFNG
0.946	0.121	0.991	0.5	0.695	0	0	interacts with	IL2 (interacts with) FOXP3	0	9606.ENSP00000226730	9606.ENSP00000365380	0	FALSE	interacts with	IL2 (interacts with) FOXP3
0.997	0.111	0.997	0	0	0	0	interacts with	IL2 (interacts with) IL1A	0	9606.ENSP00000226730	9606.ENSP00000263339	0	FALSE	interacts with	IL2 (interacts with) IL1A
0.996	0.167	0.997	0.4	0	0	0	interacts with	IL2 (interacts with) CSF2	0	9606.ENSP00000226730	9606.ENSP00000296871	0	FALSE	interacts with	IL2 (interacts with) CSF2
0.999	0.432	0.999	0	0	0	0	interacts with	IL2 (interacts with) IL4	0	9606.ENSP00000226730	9606.ENSP00000231449	0	FALSE	interacts with	IL2 (interacts with) IL4
0.999	0.055	0.999	0	0	0	0	interacts with	IL2 (interacts with) IL6	0	9606.ENSP00000226730	9606.ENSP00000385675	0	FALSE	interacts with	IL2 (interacts with) IL6
0.999	0.073	0.999	0	0	0	0	interacts with	IL2 (interacts with) IL1B	0	9606.ENSP00000226730	9606.ENSP00000263341	0	FALSE	interacts with	IL2 (interacts with) IL1B
0.999	0.266	0.999	0.4	0	0	0	interacts with	IL2 (interacts with) IL5	0	9606.ENSP00000226730	9606.ENSP00000231454	0	FALSE	interacts with	IL2 (interacts with) IL5
0.728	0.044	0.729	0	0	0	0	interacts with	IL33 (interacts with) CD4	0	9606.ENSP00000370842	9606.ENSP00000011653	0	FALSE	interacts with	IL33 (interacts with) CD4
0.766	0.094	0.779	0	0	0	0	interacts with	IL33 (interacts with) CCL17	0	9606.ENSP00000370842	9606.ENSP00000219244	0	FALSE	interacts with	IL33 (interacts with) CCL17
0.697	0.072	0.706	0	0	0	0	interacts with	IL33 (interacts with) CCL2	0	9606.ENSP00000370842	9606.ENSP00000225831	0	FALSE	interacts with	IL33 (interacts with) CCL2
0.825	0.043	0.825	0	0	0	0	interacts with	IL33 (interacts with) IL2	0	9606.ENSP00000370842	9606.ENSP00000226730	0	FALSE	interacts with	IL33 (interacts with) IL2
0.778	0	0.778	0	0	0	0	interacts with	IL33 (interacts with) IFNG	0	9606.ENSP00000370842	9606.ENSP00000229135	0	FALSE	interacts with	IL33 (interacts with) IFNG
0.904	0.085	0.908	0	0	0	0	interacts with	IL33 (interacts with) IL4	0	9606.ENSP00000370842	9606.ENSP00000231449	0	FALSE	interacts with	IL33 (interacts with) IL4
0.935	0.086	0.938	0	0	0	0	interacts with	IL33 (interacts with) IL5	0	9606.ENSP00000370842	9606.ENSP00000231454	0	FALSE	interacts with	IL33 (interacts with) IL5
0.803	0.098	0.814	0	0	0	0	interacts with	IL33 (interacts with) TLR2	0	9606.ENSP00000370842	9606.ENSP00000260010	0	FALSE	interacts with	IL33 (interacts with) TLR2
0.812	0.085	0.82	0	0	0	0	interacts with	IL33 (interacts with) IL1A	0	9606.ENSP00000370842	9606.ENSP00000263339	0	FALSE	interacts with	IL33 (interacts with) IL1A
0.886	0.078	0.89	0	0	0	0	interacts with	IL33 (interacts with) IL1B	0	9606.ENSP00000370842	9606.ENSP00000263341	0	FALSE	interacts with	IL33 (interacts with) IL1B
0.868	0.049	0.869	0	0	0	0	interacts with	IL33 (interacts with) IL18	0	9606.ENSP00000370842	9606.ENSP00000280357	0	FALSE	interacts with	IL33 (interacts with) IL18
0.703	0.042	0.703	0	0	0	0	interacts with	IL33 (interacts with) CSF2	0	9606.ENSP00000370842	9606.ENSP00000296871	0	FALSE	interacts with	IL33 (interacts with) CSF2
0.937	0	0.937	0	0	0	0	interacts with	IL33 (interacts with) IL13	0	9606.ENSP00000370842	9606.ENSP00000304915	0	FALSE	interacts with	IL33 (interacts with) IL13
0.798	0.048	0.799	0	0	0	0	interacts with	IL33 (interacts with) CXCL8	0	9606.ENSP00000370842	9606.ENSP00000306512	0	FALSE	interacts with	IL33 (interacts with) CXCL8
0.838	0.074	0.843	0	0	0	0	interacts with	IL33 (interacts with) TLR4	0	9606.ENSP00000370842	9606.ENSP00000363089	0	FALSE	interacts with	IL33 (interacts with) TLR4
0.77	0	0.77	0	0	0	0	interacts with	IL33 (interacts with) TNF	0	9606.ENSP00000370842	9606.ENSP00000398698	0	FALSE	interacts with	IL33 (interacts with) TNF
0.792	0.043	0.793	0	0	0	0	interacts with	IL33 (interacts with) IL10	0	9606.ENSP00000370842	9606.ENSP00000412237	0	FALSE	interacts with	IL33 (interacts with) IL10
0.793	0.068	0.798	0	0	0	0	interacts with	IL33 (interacts with) IL6	0	9606.ENSP00000370842	9606.ENSP00000385675	0	FALSE	interacts with	IL33 (interacts with) IL6
0.851	0.049	0.852	0	0	0	0	interacts with	IL33 (interacts with) IL17A	0	9606.ENSP00000370842	9606.ENSP00000497968	0	FALSE	interacts with	IL33 (interacts with) IL17A
0.765	0.074	0.987	0.9	0.51	0	0	interacts with	IL33 (interacts with) CASP1	0	9606.ENSP00000370842	9606.ENSP00000433138	0	FALSE	interacts with	IL33 (interacts with) CASP1
0.97	0	0.97	0	0	0	0	interacts with	IL4 (interacts with) CD4	0	9606.ENSP00000231449	9606.ENSP00000011653	0	FALSE	interacts with	IL4 (interacts with) CD4
0.72	0	0.72	0	0	0	0	interacts with	IL4 (interacts with) TIMP1	0	9606.ENSP00000231449	9606.ENSP00000218388	0	FALSE	interacts with	IL4 (interacts with) TIMP1
0.77	0.143	0.794	0	0	0	0	interacts with	IL4 (interacts with) CCL17	0	9606.ENSP00000231449	9606.ENSP00000219244	0	FALSE	interacts with	IL4 (interacts with) CCL17
0.85	0.056	0.852	0	0	0	0	interacts with	IL4 (interacts with) TGFB1	0	9606.ENSP00000231449	9606.ENSP00000221930	0	FALSE	interacts with	IL4 (interacts with) TGFB1
0.801	0.124	0.818	0	0	0	0	interacts with	IL4 (interacts with) CSF3	0	9606.ENSP00000231449	9606.ENSP00000225474	0	FALSE	interacts with	IL4 (interacts with) CSF3
0.873	0.045	0.921	0.4	0	0	0	interacts with	IL4 (interacts with) CCL2	0	9606.ENSP00000231449	9606.ENSP00000225831	0	FALSE	interacts with	IL4 (interacts with) CCL2
0.8	0.045	0.8	0	0	0	0	interacts with	IL4 (interacts with) NFKB1	0	9606.ENSP00000231449	9606.ENSP00000226574	0	FALSE	interacts with	IL4 (interacts with) NFKB1
0.999	0.432	0.999	0	0	0	0	interacts with	IL4 (interacts with) IL2	0	9606.ENSP00000231449	9606.ENSP00000226730	0	FALSE	interacts with	IL4 (interacts with) IL2
0.99	0.11	0.99	0	0	0	0	interacts with	IL4 (interacts with) IFNG	0	9606.ENSP00000231449	9606.ENSP00000229135	0	FALSE	interacts with	IL4 (interacts with) IFNG
0.713	0	0.713	0	0	0	0	interacts with	IL4 (interacts with) GAPDH	0	9606.ENSP00000231449	9606.ENSP00000380070	0	FALSE	interacts with	IL4 (interacts with) GAPDH
0.718	0	0.718	0	0	0	0	interacts with	IL4 (interacts with) TP53	0	9606.ENSP00000231449	9606.ENSP00000269305	0	FALSE	interacts with	IL4 (interacts with) TP53
0.72	0	0.72	0	0	0	0	interacts with	IL4 (interacts with) TGFA	0	9606.ENSP00000231449	9606.ENSP00000404131	0	FALSE	interacts with	IL4 (interacts with) TGFA
0.724	0	0.724	0	0	0	0	interacts with	IL4 (interacts with) CD68	0	9606.ENSP00000231449	9606.ENSP00000250092	0	FALSE	interacts with	IL4 (interacts with) CD68
0.734	0.043	0.735	0	0	0	0	interacts with	IL4 (interacts with) CXCL9	0	9606.ENSP00000231449	9606.ENSP00000354901	0	FALSE	interacts with	IL4 (interacts with) CXCL9
0.74	0.042	0.74	0	0	0	0	interacts with	IL4 (interacts with) IL1RN	0	9606.ENSP00000231449	9606.ENSP00000259206	0	FALSE	interacts with	IL4 (interacts with) IL1RN
0.584	0	0.744	0	0.411	0	0	interacts with	IL4 (interacts with) MTOR	0	9606.ENSP00000231449	9606.ENSP00000354558	0	FALSE	interacts with	IL4 (interacts with) MTOR
0.746	0	0.746	0	0	0	0	interacts with	IL4 (interacts with) CD163	0	9606.ENSP00000231449	9606.ENSP00000352071	0	FALSE	interacts with	IL4 (interacts with) CD163
0.763	0.049	0.764	0	0	0	0	interacts with	IL4 (interacts with) PTGS2	0	9606.ENSP00000231449	9606.ENSP00000356438	0	FALSE	interacts with	IL4 (interacts with) PTGS2
0.771	0	0.771	0	0	0	0	interacts with	IL4 (interacts with) CXCL12	0	9606.ENSP00000231449	9606.ENSP00000379140	0	FALSE	interacts with	IL4 (interacts with) CXCL12
0.788	0.053	0.79	0	0	0	0	interacts with	IL4 (interacts with) PTPRC	0	9606.ENSP00000231449	9606.ENSP00000411355	0	FALSE	interacts with	IL4 (interacts with) PTPRC
0.79	0.042	0.791	0	0	0	0	interacts with	IL4 (interacts with) CSF1	0	9606.ENSP00000231449	9606.ENSP00000327513	0	FALSE	interacts with	IL4 (interacts with) CSF1
0.791	0.058	0.794	0	0	0	0	interacts with	IL4 (interacts with) IFNA1	0	9606.ENSP00000231449	9606.ENSP00000276927	0	FALSE	interacts with	IL4 (interacts with) IFNA1
0.791	0.057	0.794	0	0	0	0	interacts with	IL4 (interacts with) ITGAM	0	9606.ENSP00000231449	9606.ENSP00000496959	0	FALSE	interacts with	IL4 (interacts with) ITGAM
0.802	0.059	0.805	0	0	0	0	interacts with	IL4 (interacts with) CCL4	0	9606.ENSP00000231449	9606.ENSP00000482259	0	FALSE	interacts with	IL4 (interacts with) CCL4
0.811	0	0.811	0	0	0	0	interacts with	IL4 (interacts with) ICAM1	0	9606.ENSP00000231449	9606.ENSP00000264832	0	FALSE	interacts with	IL4 (interacts with) ICAM1
0.812	0.057	0.815	0	0	0	0	interacts with	IL4 (interacts with) ITGAX	0	9606.ENSP00000231449	9606.ENSP00000454623	0	FALSE	interacts with	IL4 (interacts with) ITGAX
0.507	0	0.82	0.65	0	0	0	interacts with	IL4 (interacts with) EGFR	0	9606.ENSP00000231449	9606.ENSP00000275493	0	FALSE	interacts with	IL4 (interacts with) EGFR
0.814	0.085	0.822	0	0	0	0	interacts with	IL4 (interacts with) CRP	0	9606.ENSP00000231449	9606.ENSP00000255030	0	FALSE	interacts with	IL4 (interacts with) CRP
0.821	0.074	0.827	0	0	0	0	interacts with	IL4 (interacts with) CCL3	0	9606.ENSP00000231449	9606.ENSP00000477908	0	FALSE	interacts with	IL4 (interacts with) CCL3
0.827	0.045	0.828	0	0	0	0	interacts with	IL4 (interacts with) CCL5	0	9606.ENSP00000231449	9606.ENSP00000474412	0	FALSE	interacts with	IL4 (interacts with) CCL5
0.834	0	0.834	0	0	0	0	interacts with	IL4 (interacts with) TLR2	0	9606.ENSP00000231449	9606.ENSP00000260010	0	FALSE	interacts with	IL4 (interacts with) TLR2
0.737	0.052	0.837	0.4	0	0	0	interacts with	IL4 (interacts with) FN1	0	9606.ENSP00000231449	9606.ENSP00000346839	0	FALSE	interacts with	IL4 (interacts with) FN1
0.869	0	0.869	0	0	0	0	interacts with	IL4 (interacts with) TLR4	0	9606.ENSP00000231449	9606.ENSP00000363089	0	FALSE	interacts with	IL4 (interacts with) TLR4
0.874	0	0.874	0	0	0	0	interacts with	IL4 (interacts with) MRC1	0	9606.ENSP00000231449	9606.ENSP00000455897	0	FALSE	interacts with	IL4 (interacts with) MRC1
0.88	0.042	0.88	0	0	0	0	interacts with	IL4 (interacts with) ARG1	0	9606.ENSP00000231449	9606.ENSP00000349446	0	FALSE	interacts with	IL4 (interacts with) ARG1
0.882	0.044	0.882	0	0	0	0	interacts with	IL4 (interacts with) CXCL10	0	9606.ENSP00000231449	9606.ENSP00000305651	0	FALSE	interacts with	IL4 (interacts with) CXCL10
0.836	0	0.897	0.4	0	0	0	interacts with	IL4 (interacts with) IL18	0	9606.ENSP00000231449	9606.ENSP00000280357	0	FALSE	interacts with	IL4 (interacts with) IL18
0.904	0.085	0.908	0	0	0	0	interacts with	IL4 (interacts with) IL33	0	9606.ENSP00000231449	9606.ENSP00000370842	0	FALSE	interacts with	IL4 (interacts with) IL33
0.848	0	0.92	0.5	0	0	0	interacts with	IL4 (interacts with) STAT3	0	9606.ENSP00000231449	9606.ENSP00000264657	0	FALSE	interacts with	IL4 (interacts with) STAT3
0.923	0.072	0.925	0	0	0	0	interacts with	IL4 (interacts with) FOXP3	0	9606.ENSP00000231449	9606.ENSP00000365380	0	FALSE	interacts with	IL4 (interacts with) FOXP3
0.947	0.042	0.947	0	0	0	0	interacts with	IL4 (interacts with) CD8A	0	9606.ENSP00000231449	9606.ENSP00000386559	0	FALSE	interacts with	IL4 (interacts with) CD8A
0.955	0.119	0.959	0	0	0	0	interacts with	IL4 (interacts with) IL17A	0	9606.ENSP00000231449	9606.ENSP00000497968	0	FALSE	interacts with	IL4 (interacts with) IL17A
0.958	0.152	0.963	0	0	0	0	interacts with	IL4 (interacts with) CSF2	0	9606.ENSP00000231449	9606.ENSP00000296871	0	FALSE	interacts with	IL4 (interacts with) CSF2
0.963	0.055	0.977	0.4	0	0	0	interacts with	IL4 (interacts with) TNF	0	9606.ENSP00000231449	9606.ENSP00000398698	0	FALSE	interacts with	IL4 (interacts with) TNF
0.986	0.043	0.986	0	0	0	0	interacts with	IL4 (interacts with) IL10	0	9606.ENSP00000231449	9606.ENSP00000412237	0	FALSE	interacts with	IL4 (interacts with) IL10
0.978	0.044	0.986	0.4	0	0	0	interacts with	IL4 (interacts with) IL6	0	9606.ENSP00000231449	9606.ENSP00000385675	0	FALSE	interacts with	IL4 (interacts with) IL6
0.983	0.351	0.988	0	0	0	0	interacts with	IL4 (interacts with) IL5	0	9606.ENSP00000231449	9606.ENSP00000231454	0	FALSE	interacts with	IL4 (interacts with) IL5
0.991	0.301	0.993	0	0	0	0	interacts with	IL4 (interacts with) IL13	0	9606.ENSP00000231449	9606.ENSP00000304915	0	FALSE	interacts with	IL4 (interacts with) IL13
0.992	0.111	0.995	0.4	0	0	0	interacts with	IL4 (interacts with) IL1A	0	9606.ENSP00000231449	9606.ENSP00000263339	0	FALSE	interacts with	IL4 (interacts with) IL1A
0.996	0.049	0.997	0.4	0	0	0	interacts with	IL4 (interacts with) CXCL8	0	9606.ENSP00000231449	9606.ENSP00000306512	0	FALSE	interacts with	IL4 (interacts with) CXCL8
0.998	0.072	0.998	0.4	0	0	0	interacts with	IL4 (interacts with) IL1B	0	9606.ENSP00000231449	9606.ENSP00000263341	0	FALSE	interacts with	IL4 (interacts with) IL1B
0.93	0	0.93	0	0	0	0	interacts with	IL5 (interacts with) CD4	0	9606.ENSP00000231454	9606.ENSP00000011653	0	FALSE	interacts with	IL5 (interacts with) CD4
0.734	0.192	0.776	0	0	0	0	interacts with	IL5 (interacts with) CCL17	0	9606.ENSP00000231454	9606.ENSP00000219244	0	FALSE	interacts with	IL5 (interacts with) CCL17
0.827	0.121	0.842	0	0	0	0	interacts with	IL5 (interacts with) CSF3	0	9606.ENSP00000231454	9606.ENSP00000225474	0	FALSE	interacts with	IL5 (interacts with) CSF3
0.862	0.042	0.862	0	0	0	0	interacts with	IL5 (interacts with) CCL2	0	9606.ENSP00000231454	9606.ENSP00000225831	0	FALSE	interacts with	IL5 (interacts with) CCL2
0.999	0.266	0.999	0.4	0	0	0	interacts with	IL5 (interacts with) IL2	0	9606.ENSP00000231454	9606.ENSP00000226730	0	FALSE	interacts with	IL5 (interacts with) IL2
0.959	0.072	0.96	0	0	0	0	interacts with	IL5 (interacts with) IFNG	0	9606.ENSP00000231454	9606.ENSP00000229135	0	FALSE	interacts with	IL5 (interacts with) IFNG
0.983	0.351	0.988	0	0	0	0	interacts with	IL5 (interacts with) IL4	0	9606.ENSP00000231454	9606.ENSP00000231449	0	FALSE	interacts with	IL5 (interacts with) IL4
0.712	0.055	0.716	0	0	0	0	interacts with	IL5 (interacts with) IFNA1	0	9606.ENSP00000231454	9606.ENSP00000276927	0	FALSE	interacts with	IL5 (interacts with) IFNA1
0.716	0.049	0.718	0	0	0	0	interacts with	IL5 (interacts with) CXCL9	0	9606.ENSP00000231454	9606.ENSP00000354901	0	FALSE	interacts with	IL5 (interacts with) CXCL9
0.348	0	0.762	0.65	0	0	0	interacts with	IL5 (interacts with) EGFR	0	9606.ENSP00000231454	9606.ENSP00000275493	0	FALSE	interacts with	IL5 (interacts with) EGFR
0.786	0	0.786	0	0	0	0	interacts with	IL5 (interacts with) IL18	0	9606.ENSP00000231454	9606.ENSP00000280357	0	FALSE	interacts with	IL5 (interacts with) IL18
0.801	0.044	0.801	0	0	0	0	interacts with	IL5 (interacts with) CXCL10	0	9606.ENSP00000231454	9606.ENSP00000305651	0	FALSE	interacts with	IL5 (interacts with) CXCL10
0.777	0.166	0.806	0	0	0	0	interacts with	IL5 (interacts with) FOXP3	0	9606.ENSP00000231454	9606.ENSP00000365380	0	FALSE	interacts with	IL5 (interacts with) FOXP3
0.826	0.042	0.826	0	0	0	0	interacts with	IL5 (interacts with) CCL4	0	9606.ENSP00000231454	9606.ENSP00000482259	0	FALSE	interacts with	IL5 (interacts with) CCL4
0.828	0.067	0.833	0	0	0	0	interacts with	IL5 (interacts with) CCL3	0	9606.ENSP00000231454	9606.ENSP00000477908	0	FALSE	interacts with	IL5 (interacts with) CCL3
0.836	0	0.836	0	0	0	0	interacts with	IL5 (interacts with) CCL5	0	9606.ENSP00000231454	9606.ENSP00000474412	0	FALSE	interacts with	IL5 (interacts with) CCL5
0.865	0	0.865	0	0	0	0	interacts with	IL5 (interacts with) CD8A	0	9606.ENSP00000231454	9606.ENSP00000386559	0	FALSE	interacts with	IL5 (interacts with) CD8A
0.909	0.134	0.918	0	0	0	0	interacts with	IL5 (interacts with) IL1A	0	9606.ENSP00000231454	9606.ENSP00000263339	0	FALSE	interacts with	IL5 (interacts with) IL1A
0.929	0.054	0.93	0	0	0	0	interacts with	IL5 (interacts with) TNF	0	9606.ENSP00000231454	9606.ENSP00000398698	0	FALSE	interacts with	IL5 (interacts with) TNF
0.932	0	0.932	0	0	0	0	interacts with	IL5 (interacts with) CXCL8	0	9606.ENSP00000231454	9606.ENSP00000306512	0	FALSE	interacts with	IL5 (interacts with) CXCL8
0.935	0.086	0.938	0	0	0	0	interacts with	IL5 (interacts with) IL33	0	9606.ENSP00000231454	9606.ENSP00000370842	0	FALSE	interacts with	IL5 (interacts with) IL33
0.933	0.126	0.939	0	0	0	0	interacts with	IL5 (interacts with) IL17A	0	9606.ENSP00000231454	9606.ENSP00000497968	0	FALSE	interacts with	IL5 (interacts with) IL17A
0.977	0.042	0.977	0	0	0	0	interacts with	IL5 (interacts with) IL6	0	9606.ENSP00000231454	9606.ENSP00000385675	0	FALSE	interacts with	IL5 (interacts with) IL6
0.982	0	0.982	0	0	0	0	interacts with	IL5 (interacts with) IL10	0	9606.ENSP00000231454	9606.ENSP00000412237	0	FALSE	interacts with	IL5 (interacts with) IL10
0.986	0.406	0.991	0	0	0	0	interacts with	IL5 (interacts with) IL13	0	9606.ENSP00000231454	9606.ENSP00000304915	0	FALSE	interacts with	IL5 (interacts with) IL13
0.988	0.168	0.993	0.4	0	0	0	interacts with	IL5 (interacts with) CSF2	0	9606.ENSP00000231454	9606.ENSP00000296871	0	FALSE	interacts with	IL5 (interacts with) CSF2
0.998	0.104	0.998	0	0	0	0	interacts with	IL5 (interacts with) IL1B	0	9606.ENSP00000231454	9606.ENSP00000263341	0	FALSE	interacts with	IL5 (interacts with) IL1B
0.966	0	0.966	0	0	0	0	interacts with	IL6 (interacts with) CD4	0	9606.ENSP00000385675	9606.ENSP00000011653	0	FALSE	interacts with	IL6 (interacts with) CD4
0.897	0.055	0.936	0.4	0	0	0	interacts with	IL6 (interacts with) MAPK1	0	9606.ENSP00000385675	9606.ENSP00000215832	0	FALSE	interacts with	IL6 (interacts with) MAPK1
0.888	0.152	0.938	0.4	0	0	0	interacts with	IL6 (interacts with) TIMP1	0	9606.ENSP00000385675	9606.ENSP00000218388	0	FALSE	interacts with	IL6 (interacts with) TIMP1
0.734	0.116	0.847	0.4	0	0	0	interacts with	IL6 (interacts with) MMP2	0	9606.ENSP00000385675	9606.ENSP00000219070	0	FALSE	interacts with	IL6 (interacts with) MMP2
0.802	0.062	0.806	0	0	0	0	interacts with	IL6 (interacts with) CCL17	0	9606.ENSP00000385675	9606.ENSP00000219244	0	FALSE	interacts with	IL6 (interacts with) CCL17
0.932	0.106	0.96	0.4	0	0	0	interacts with	IL6 (interacts with) TGFB1	0	9606.ENSP00000385675	9606.ENSP00000221930	0	FALSE	interacts with	IL6 (interacts with) TGFB1
0.773	0.059	0.86	0.4	0	0	0	interacts with	IL6 (interacts with) HGF	0	9606.ENSP00000385675	9606.ENSP00000222390	0	FALSE	interacts with	IL6 (interacts with) HGF
0.804	0.258	0.849	0	0	0	0	interacts with	IL6 (interacts with) SERPINE1	0	9606.ENSP00000385675	9606.ENSP00000223095	0	FALSE	interacts with	IL6 (interacts with) SERPINE1
0.972	0.369	0.988	0.4	0	0	0	interacts with	IL6 (interacts with) CSF3	0	9606.ENSP00000385675	9606.ENSP00000225474	0	FALSE	interacts with	IL6 (interacts with) CSF3
0.953	0.517	0.985	0.4	0	0	0	interacts with	IL6 (interacts with) CCL2	0	9606.ENSP00000385675	9606.ENSP00000225831	0	FALSE	interacts with	IL6 (interacts with) CCL2
0.942	0.176	0.994	0.9	0	0	0	interacts with	IL6 (interacts with) NFKB1	0	9606.ENSP00000385675	9606.ENSP00000226574	0	FALSE	interacts with	IL6 (interacts with) NFKB1
0.999	0.055	0.999	0	0	0	0	interacts with	IL6 (interacts with) IL2	0	9606.ENSP00000385675	9606.ENSP00000226730	0	FALSE	interacts with	IL6 (interacts with) IL2
0.981	0.128	0.983	0	0	0	0	interacts with	IL6 (interacts with) IFNG	0	9606.ENSP00000385675	9606.ENSP00000229135	0	FALSE	interacts with	IL6 (interacts with) IFNG
0.842	0.083	0.848	0	0	0	0	interacts with	IL6 (interacts with) MAPK14	0	9606.ENSP00000385675	9606.ENSP00000229795	0	FALSE	interacts with	IL6 (interacts with) MAPK14
0.978	0.044	0.986	0.4	0	0	0	interacts with	IL6 (interacts with) IL4	0	9606.ENSP00000385675	9606.ENSP00000231449	0	FALSE	interacts with	IL6 (interacts with) IL4
0.977	0.042	0.977	0	0	0	0	interacts with	IL6 (interacts with) IL5	0	9606.ENSP00000385675	9606.ENSP00000231454	0	FALSE	interacts with	IL6 (interacts with) IL5
0.826	0.112	0.839	0	0	0	0	interacts with	IL6 (interacts with) CD68	0	9606.ENSP00000385675	9606.ENSP00000250092	0	FALSE	interacts with	IL6 (interacts with) CD68
0.968	0.047	0.968	0	0	0	0	interacts with	IL6 (interacts with) CRP	0	9606.ENSP00000385675	9606.ENSP00000255030	0	FALSE	interacts with	IL6 (interacts with) CRP
0.913	0.17	0.925	0	0	0	0	interacts with	IL6 (interacts with) IL1RN	0	9606.ENSP00000385675	9606.ENSP00000259206	0	FALSE	interacts with	IL6 (interacts with) IL1RN
0.938	0.099	0.942	0	0	0	0	interacts with	IL6 (interacts with) TLR2	0	9606.ENSP00000385675	9606.ENSP00000260010	0	FALSE	interacts with	IL6 (interacts with) TLR2
0.974	0.376	0.989	0.4	0	0	0	interacts with	IL6 (interacts with) IL1A	0	9606.ENSP00000385675	9606.ENSP00000263339	0	FALSE	interacts with	IL6 (interacts with) IL1A
0.989	0.515	0.996	0.4	0	0	0	interacts with	IL6 (interacts with) IL1B	0	9606.ENSP00000385675	9606.ENSP00000263341	0	FALSE	interacts with	IL6 (interacts with) IL1B
0.788	0.151	0.882	0.4	0	0	0	interacts with	IL6 (interacts with) FGF2	0	9606.ENSP00000385675	9606.ENSP00000264498	0	FALSE	interacts with	IL6 (interacts with) FGF2
0.965	0.102	0.984	0.5	0.095	0	0	interacts with	IL6 (interacts with) STAT3	0	9606.ENSP00000385675	9606.ENSP00000264657	0	FALSE	interacts with	IL6 (interacts with) STAT3
0.931	0.27	0.947	0	0	0	0	interacts with	IL6 (interacts with) ICAM1	0	9606.ENSP00000385675	9606.ENSP00000264832	0	FALSE	interacts with	IL6 (interacts with) ICAM1
0.777	0	0.777	0	0	0	0	interacts with	IL6 (interacts with) TP53	0	9606.ENSP00000385675	9606.ENSP00000269305	0	FALSE	interacts with	IL6 (interacts with) TP53
0.943	0.042	0.979	0.65	0	0	0	interacts with	IL6 (interacts with) EGFR	0	9606.ENSP00000385675	9606.ENSP00000275493	0	FALSE	interacts with	IL6 (interacts with) EGFR
0.923	0.092	0.927	0	0	0	0	interacts with	IL6 (interacts with) IFNA1	0	9606.ENSP00000385675	9606.ENSP00000276927	0	FALSE	interacts with	IL6 (interacts with) IFNA1
0.953	0	0.97	0.4	0	0	0	interacts with	IL6 (interacts with) IL18	0	9606.ENSP00000385675	9606.ENSP00000280357	0	FALSE	interacts with	IL6 (interacts with) IL18
0.812	0.082	0.82	0	0	0	0	interacts with	IL6 (interacts with) PPARG	0	9606.ENSP00000385675	9606.ENSP00000287820	0	FALSE	interacts with	IL6 (interacts with) PPARG
0.879	0	0.879	0	0	0	0	interacts with	IL6 (interacts with) CCR2	0	9606.ENSP00000385675	9606.ENSP00000292301	0	FALSE	interacts with	IL6 (interacts with) CCR2
0.945	0.284	0.974	0.4	0	0	0	interacts with	IL6 (interacts with) CSF2	0	9606.ENSP00000385675	9606.ENSP00000296871	0	FALSE	interacts with	IL6 (interacts with) CSF2
0.929	0.061	0.957	0.4	0	0	0	interacts with	IL6 (interacts with) IL13	0	9606.ENSP00000385675	9606.ENSP00000304915	0	FALSE	interacts with	IL6 (interacts with) IL13
0.923	0.203	0.96	0.4	0	0	0	interacts with	IL6 (interacts with) CXCL10	0	9606.ENSP00000385675	9606.ENSP00000305651	0	FALSE	interacts with	IL6 (interacts with) CXCL10
0.976	0.445	0.991	0.4	0	0	0	interacts with	IL6 (interacts with) CXCL8	0	9606.ENSP00000385675	9606.ENSP00000306512	0	FALSE	interacts with	IL6 (interacts with) CXCL8
0.873	0.103	0.881	0	0	0	0	interacts with	IL6 (interacts with) CASP3	0	9606.ENSP00000385675	9606.ENSP00000311032	0	FALSE	interacts with	IL6 (interacts with) CASP3
0.731	0.169	0.854	0.4	0	0	0	interacts with	IL6 (interacts with) MMP1	0	9606.ENSP00000385675	9606.ENSP00000322788	0	FALSE	interacts with	IL6 (interacts with) MMP1
0.781	0.042	0.781	0	0	0	0	interacts with	IL6 (interacts with) NOS2	0	9606.ENSP00000385675	9606.ENSP00000327251	0	FALSE	interacts with	IL6 (interacts with) NOS2
0.805	0.146	0.827	0	0	0	0	interacts with	IL6 (interacts with) CSF1	0	9606.ENSP00000385675	9606.ENSP00000327513	0	FALSE	interacts with	IL6 (interacts with) CSF1
0.841	0.155	0.86	0	0	0	0	interacts with	IL6 (interacts with) NLRP3	0	9606.ENSP00000385675	9606.ENSP00000337383	0	FALSE	interacts with	IL6 (interacts with) NLRP3
0.782	0.086	0.792	0	0	0	0	interacts with	IL6 (interacts with) HMGB1	0	9606.ENSP00000385675	9606.ENSP00000345347	0	FALSE	interacts with	IL6 (interacts with) HMGB1
0.895	0.087	0.9	0	0	0	0	interacts with	IL6 (interacts with) FN1	0	9606.ENSP00000385675	9606.ENSP00000346839	0	FALSE	interacts with	IL6 (interacts with) FN1
0.792	0.097	0.804	0	0	0	0	interacts with	IL6 (interacts with) ARG1	0	9606.ENSP00000385675	9606.ENSP00000349446	0	FALSE	interacts with	IL6 (interacts with) ARG1
0.855	0.101	0.964	0.75	0	0	0	interacts with	IL6 (interacts with) CD163	0	9606.ENSP00000385675	9606.ENSP00000352071	0	FALSE	interacts with	IL6 (interacts with) CD163
0.772	0	0.772	0	0	0	0	interacts with	IL6 (interacts with) MTOR	0	9606.ENSP00000385675	9606.ENSP00000354558	0	FALSE	interacts with	IL6 (interacts with) MTOR
0.796	0.129	0.815	0	0	0	0	interacts with	IL6 (interacts with) CXCL9	0	9606.ENSP00000385675	9606.ENSP00000354901	0	FALSE	interacts with	IL6 (interacts with) CXCL9
0.812	0.079	0.819	0	0	0	0	interacts with	IL6 (interacts with) TGFB2	0	9606.ENSP00000385675	9606.ENSP00000355896	0	FALSE	interacts with	IL6 (interacts with) TGFB2
0.926	0.484	0.96	0	0	0	0	interacts with	IL6 (interacts with) PTGS2	0	9606.ENSP00000385675	9606.ENSP00000356438	0	FALSE	interacts with	IL6 (interacts with) PTGS2
0.736	0.168	0.771	0	0	0	0	interacts with	IL6 (interacts with) CCN2	0	9606.ENSP00000385675	9606.ENSP00000356954	0	FALSE	interacts with	IL6 (interacts with) CCN2
0.93	0.106	0.959	0.4	0	0	0	interacts with	IL6 (interacts with) MMP9	0	9606.ENSP00000385675	9606.ENSP00000361405	0	FALSE	interacts with	IL6 (interacts with) MMP9
0.971	0.104	0.973	0	0	0	0	interacts with	IL6 (interacts with) TLR4	0	9606.ENSP00000385675	9606.ENSP00000363089	0	FALSE	interacts with	IL6 (interacts with) TLR4
0.908	0	0.913	0	0.095	0	0	interacts with	IL6 (interacts with) FOXP3	0	9606.ENSP00000385675	9606.ENSP00000365380	0	FALSE	interacts with	IL6 (interacts with) FOXP3
0.742	0.128	0.765	0	0	0	0	interacts with	IL6 (interacts with) EDN1	0	9606.ENSP00000385675	9606.ENSP00000368683	0	FALSE	interacts with	IL6 (interacts with) EDN1
0.793	0.068	0.798	0	0	0	0	interacts with	IL6 (interacts with) IL33	0	9606.ENSP00000385675	9606.ENSP00000370842	0	FALSE	interacts with	IL6 (interacts with) IL33
0.913	0	0.913	0	0	0	0	interacts with	IL6 (interacts with) IGF1	0	9606.ENSP00000385675	9606.ENSP00000376637	0	FALSE	interacts with	IL6 (interacts with) IGF1
0.747	0.048	0.748	0	0	0	0	interacts with	IL6 (interacts with) SPP1	0	9606.ENSP00000385675	9606.ENSP00000378517	0	FALSE	interacts with	IL6 (interacts with) SPP1
0.938	0	0.938	0	0	0	0	interacts with	IL6 (interacts with) MAPK8	0	9606.ENSP00000385675	9606.ENSP00000378974	0	FALSE	interacts with	IL6 (interacts with) MAPK8
0.792	0.13	0.811	0	0	0	0	interacts with	IL6 (interacts with) CXCL12	0	9606.ENSP00000385675	9606.ENSP00000379140	0	FALSE	interacts with	IL6 (interacts with) CXCL12
0.879	0	0.879	0	0	0	0	interacts with	IL6 (interacts with) GAPDH	0	9606.ENSP00000385675	9606.ENSP00000380070	0	FALSE	interacts with	IL6 (interacts with) GAPDH
0.933	0	0.933	0	0	0	0	interacts with	IL6 (interacts with) INS	0	9606.ENSP00000385675	9606.ENSP00000380432	0	FALSE	interacts with	IL6 (interacts with) INS
0.866	0.057	0.868	0	0	0	0	interacts with	IL6 (interacts with) BCL2	0	9606.ENSP00000385675	9606.ENSP00000381185	0	FALSE	interacts with	IL6 (interacts with) BCL2
0.73	0.044	0.73	0	0	0	0	interacts with	IL6 (interacts with) MUC1	0	9606.ENSP00000385675	9606.ENSP00000484824	0	FALSE	interacts with	IL6 (interacts with) MUC1
0.718	0.127	0.743	0	0	0	0	interacts with	IL6 (interacts with) MMP12	0	9606.ENSP00000385675	9606.ENSP00000458585	0	FALSE	interacts with	IL6 (interacts with) MMP12
0.781	0.045	0.782	0	0	0	0	interacts with	IL6 (interacts with) MRC1	0	9606.ENSP00000385675	9606.ENSP00000455897	0	FALSE	interacts with	IL6 (interacts with) MRC1
0.788	0.084	0.797	0	0	0	0	interacts with	IL6 (interacts with) ITGAX	0	9606.ENSP00000385675	9606.ENSP00000454623	0	FALSE	interacts with	IL6 (interacts with) ITGAX
0.777	0.139	0.8	0	0	0	0	interacts with	IL6 (interacts with) HIF1A	0	9606.ENSP00000385675	9606.ENSP00000437955	0	FALSE	interacts with	IL6 (interacts with) HIF1A
0.813	0	0.813	0	0	0	0	interacts with	IL6 (interacts with) CTNNB1	0	9606.ENSP00000385675	9606.ENSP00000495360	0	FALSE	interacts with	IL6 (interacts with) CTNNB1
0.852	0.093	0.86	0	0	0	0	interacts with	IL6 (interacts with) PTPRC	0	9606.ENSP00000385675	9606.ENSP00000411355	0	FALSE	interacts with	IL6 (interacts with) PTPRC
0.872	0	0.872	0	0	0	0	interacts with	IL6 (interacts with) AKT1	0	9606.ENSP00000385675	9606.ENSP00000451828	0	FALSE	interacts with	IL6 (interacts with) AKT1
0.869	0.128	0.881	0	0	0	0	interacts with	IL6 (interacts with) CASP1	0	9606.ENSP00000385675	9606.ENSP00000433138	0	FALSE	interacts with	IL6 (interacts with) CASP1
0.892	0.088	0.897	0	0	0	0	interacts with	IL6 (interacts with) ITGAM	0	9606.ENSP00000385675	9606.ENSP00000496959	0	FALSE	interacts with	IL6 (interacts with) ITGAM
0.93	0.042	0.93	0	0	0	0	interacts with	IL6 (interacts with) CD8A	0	9606.ENSP00000385675	9606.ENSP00000386559	0	FALSE	interacts with	IL6 (interacts with) CD8A
0.876	0.17	0.933	0.4	0	0	0	interacts with	IL6 (interacts with) CCL4	0	9606.ENSP00000385675	9606.ENSP00000482259	0	FALSE	interacts with	IL6 (interacts with) CCL4
0.912	0.127	0.95	0.4	0	0	0	interacts with	IL6 (interacts with) CCL5	0	9606.ENSP00000385675	9606.ENSP00000474412	0	FALSE	interacts with	IL6 (interacts with) CCL5
0.919	0.277	0.962	0.4	0	0	0	interacts with	IL6 (interacts with) CCL3	0	9606.ENSP00000385675	9606.ENSP00000477908	0	FALSE	interacts with	IL6 (interacts with) CCL3
0.968	0.073	0.98	0.4	0	0	0	interacts with	IL6 (interacts with) IL17A	0	9606.ENSP00000385675	9606.ENSP00000497968	0	FALSE	interacts with	IL6 (interacts with) IL17A
0.989	0.261	0.994	0.4	0	0	0	interacts with	IL6 (interacts with) TNF	0	9606.ENSP00000385675	9606.ENSP00000398698	0	FALSE	interacts with	IL6 (interacts with) TNF
0.988	0.13	0.997	0.8	0	0	0	interacts with	IL6 (interacts with) IL10	0	9606.ENSP00000385675	9606.ENSP00000412237	0	FALSE	interacts with	IL6 (interacts with) IL10
0.811	0.042	0.829	0	0.128	0	0	interacts with	INS (interacts with) CD4	0	9606.ENSP00000380432	9606.ENSP00000011653	0	FALSE	interacts with	INS (interacts with) CD4
0.745	0.055	0.763	0	0.096	0	0	interacts with	INS (interacts with) MAPK1	0	9606.ENSP00000380432	9606.ENSP00000215832	0	FALSE	interacts with	INS (interacts with) MAPK1
0.753	0.06	0.758	0	0	0	0	interacts with	INS (interacts with) TGFB1	0	9606.ENSP00000380432	9606.ENSP00000221930	0	FALSE	interacts with	INS (interacts with) TGFB1
0.789	0	0.789	0	0	0	0	interacts with	INS (interacts with) HGF	0	9606.ENSP00000380432	9606.ENSP00000222390	0	FALSE	interacts with	INS (interacts with) HGF
0.848	0.074	0.853	0	0	0	0	interacts with	INS (interacts with) SERPINE1	0	9606.ENSP00000380432	9606.ENSP00000223095	0	FALSE	interacts with	INS (interacts with) SERPINE1
0.693	0.093	0.709	0	0	0	0	interacts with	INS (interacts with) CSF3	0	9606.ENSP00000380432	9606.ENSP00000225474	0	FALSE	interacts with	INS (interacts with) CSF3
0.771	0.076	0.78	0	0	0	0	interacts with	INS (interacts with) CCL2	0	9606.ENSP00000380432	9606.ENSP00000225831	0	FALSE	interacts with	INS (interacts with) CCL2
0.875	0	0.875	0	0	0	0	interacts with	INS (interacts with) NFKB1	0	9606.ENSP00000380432	9606.ENSP00000226574	0	FALSE	interacts with	INS (interacts with) NFKB1
0.722	0.087	0.735	0	0	0	0	interacts with	INS (interacts with) IL2	0	9606.ENSP00000380432	9606.ENSP00000226730	0	FALSE	interacts with	INS (interacts with) IL2
0.813	0	0.813	0	0	0	0	interacts with	INS (interacts with) IFNG	0	9606.ENSP00000380432	9606.ENSP00000229135	0	FALSE	interacts with	INS (interacts with) IFNG
0.751	0.067	0.757	0	0	0	0	interacts with	INS (interacts with) MAPK14	0	9606.ENSP00000380432	9606.ENSP00000229795	0	FALSE	interacts with	INS (interacts with) MAPK14
0.887	0.082	0.891	0	0	0	0	interacts with	INS (interacts with) CRP	0	9606.ENSP00000380432	9606.ENSP00000255030	0	FALSE	interacts with	INS (interacts with) CRP
0.714	0.099	0.732	0	0	0	0	interacts with	INS (interacts with) IL1A	0	9606.ENSP00000380432	9606.ENSP00000263339	0	FALSE	interacts with	INS (interacts with) IL1A
0.893	0.068	0.896	0	0	0	0	interacts with	INS (interacts with) IL1B	0	9606.ENSP00000380432	9606.ENSP00000263341	0	FALSE	interacts with	INS (interacts with) IL1B
0.836	0.074	0.842	0	0	0	0	interacts with	INS (interacts with) FGF2	0	9606.ENSP00000380432	9606.ENSP00000264498	0	FALSE	interacts with	INS (interacts with) FGF2
0.88	0.086	0.885	0	0	0	0	interacts with	INS (interacts with) STAT3	0	9606.ENSP00000380432	9606.ENSP00000264657	0	FALSE	interacts with	INS (interacts with) STAT3
0.879	0	0.879	0	0	0	0	interacts with	INS (interacts with) TP53	0	9606.ENSP00000380432	9606.ENSP00000269305	0	FALSE	interacts with	INS (interacts with) TP53
0.93	0	0.992	0.9	0	0	0	interacts with	INS (interacts with) EGFR	0	9606.ENSP00000380432	9606.ENSP00000275493	0	FALSE	interacts with	INS (interacts with) EGFR
0.721	0	0.721	0	0	0	0	interacts with	INS (interacts with) IL18	0	9606.ENSP00000380432	9606.ENSP00000280357	0	FALSE	interacts with	INS (interacts with) IL18
0.944	0	0.944	0	0	0	0	interacts with	INS (interacts with) PPARG	0	9606.ENSP00000380432	9606.ENSP00000287820	0	FALSE	interacts with	INS (interacts with) PPARG
0.758	0.056	0.761	0	0	0	0	interacts with	INS (interacts with) CASP3	0	9606.ENSP00000380432	9606.ENSP00000311032	0	FALSE	interacts with	INS (interacts with) CASP3
0.697	0.055	0.701	0	0	0	0	interacts with	INS (interacts with) FN1	0	9606.ENSP00000380432	9606.ENSP00000346839	0	FALSE	interacts with	INS (interacts with) FN1
0.882	0	0.882	0	0	0	0	interacts with	INS (interacts with) MTOR	0	9606.ENSP00000380432	9606.ENSP00000354558	0	FALSE	interacts with	INS (interacts with) MTOR
[truncated: 957 more rows]

## Sheet: node
Degree	name
88	AKT1
110	CD4
44	MAPK1
66	MMP2
102	TGFB1
42	HGF
126	CCL2
98	NFKB1
132	IFNG
34	MAPK14
80	TLR2
40	CDH1
30	SMAD2
148	IL1B
74	FGF2
122	STAT3
92	ICAM1
82	TP53
98	EGFR
54	PPARG
116	CXCL8
64	CASP3
20	NOS2
42	SMAD3
102	FN1
32	MTOR
70	PTGS2
36	CCN2
106	MMP9
112	TLR4
58	IGF1
36	MAPK8
72	CXCL12
84	GAPDH
70	INS
68	BCL2
156	IL6
98	CD8A
152	TNF
22	TGFA
138	IL10
56	HIF1A
22	VIM
90	CCL5
68	CTNNB1
32	ARG1
102	IL4
48	CD68
66	CCR2
90	IL13
50	CD163
76	ITGAM
42	MRC1
88	IL2
40	FASLG
52	FOXP3
74	CCL3
38	CASP1
36	IL1RN
98	IL1A
70	IL18
24	NLRP3
40	IL33
30	HMGB1
40	CCL17
54	IL5
62	CXCL9
44	CX3CR1
82	CXCL10
62	CCL4
18	CCL18
58	TIMP1
60	SERPINE1
66	CSF3
30	TGFB2
54	ITGAX
26	SPP1
66	PTPRC
18	MMP12
60	IFNA1
46	MMP1
26	EDN1
52	CRP
52	CSF1
78	IL17A
78	CSF2
10	IFIH1
26	COL1A1
6	CD14
26	MMP7
8	COL18A1
16	ELANE
20	MUC1
8	SFTPD
2	GLI2
2	NELFCD
4	SFTPA1
4	SFTPC
