# Supplementary material for: Macrophages and pulmonary fibrosis: a bibliometric and visual analysis of publications from 1990 to 2023
Source: Front Med (Lausanne). 2024 Jun 17;11:1374177. doi: 10.3389/fmed.2024.1374177 (PMC11215139; doi:10.3389/fmed.2024.1374177)
Supplement: Supplementary file 15 [file Table_15.XLS]

## Sheet: map
Disease ID	Disease	frequency	cluster	x	y	weight<Links>	weight<Total link strength>
130	pulmonary fibrosis	1862	1	0.5666	0.1333	148	9952
72	idiopathic pulmonary fibrosis	1164	1	0.9056	0.3071	148	8178
82	lung injury	889	1	0.8784	0.1724	148	6979
2	acute kidney injury	233	1	0.5069	0.2972	146	2416
142	silicosis	192	1	0.5217	0.1991	140	1536
133	renal insufficiency	175	1	0.5529	0.148	145	1918
39	chemical and drug induced liver injury	158	1	0.6919	0.4776	147	2106
13	asbestosis	149	1	0.5148	0.3364	142	1127
79	liver failure	105	1	0.888	0.19	143	1385
66	heart failure	94	1	0.8958	0.3459	142	1314
118	pneumoconiosis	92	1	0.6152	0.0983	116	705
78	leukemia	89	1	0.8958	0.2084	142	1047
40	colitis	86	1	0.7119	0.4781	140	1168
97	myocardial infarction	81	1	0.8242	0.114	135	1143
16	attenuated familial adenomatous polyposis	74	1	0.5304	0.3733	131	837
149	ventricular remodeling	74	1	0.5069	0.2571	128	946
56	fatty liver	73	1	0.8242	0.4403	144	1136
30	carcinoma, non-small-cell lung	72	1	0.5816	0.4343	133	912
94	mitochondrial diseases	72	1	0.8542	0.1405	131	883
73	inflammatory bowel diseases	71	1	0.9076	0.2872	142	1010
1	acquired immunodeficiency syndrome	69	1	0.5059	0.2772	134	703
124	pulmonary arterial hypertension	68	1	0.5816	0.12	134	923
100	neoplasm metastasis	67	1	0.7896	0.094	133	935
65	heart arrest	63	1	0.888	0.3644	131	800
22	brain injuries	62	1	0.5529	0.4063	132	841
5	adenomatous polyposis coli	60	1	0.5099	0.317	134	722
29	carcinoma, hepatocellular	55	1	0.5666	0.421	130	842
147	ureteral obstruction	54	1	0.5099	0.2373	124	681
33	cardiomyopathies	53	1	0.6335	0.4642	131	704
144	soft tissue injuries	53	1	0.5148	0.2179	124	599
18	blister	52	1	0.5408	0.3904	121	606
90	melanoma	52	1	0.8671	0.1558	133	663
112	parkinson disease	51	1	0.672	0.0792	127	592
61	graft vs host disease	50	1	0.8784	0.382	128	578
75	juvenile-onset scleroderma	50	1	0.9076	0.2671	125	705
42	crohn disease	49	1	0.7516	0.4731	132	762
58	glioma	44	1	0.8399	0.4278	120	567
107	occupational diseases	44	1	0.7516	0.0812	87	373
109	pancreatic neoplasms	44	1	0.7119	0.0762	126	694
32	cardiomegaly	43	1	0.6152	0.456	121	603
47	diabetic nephropathies	43	1	0.7896	0.4604	128	694
52	end stage liver disease	42	1	0.8074	0.4512	119	562
31	carcinoma, squamous cell	41	1	0.5978	0.446	118	535
106	non-alcoholic fatty liver disease	39	1	0.7709	0.0866	120	726
111	papillary renal cell carcinoma, sporadic	34	1	0.6919	0.0767	109	445
98	myocarditis	32	1	0.8074	0.1031	125	504
59	glomerulonephritis	31	1	0.8542	0.4139	119	471
138	schistosomiasis	31	1	0.5408	0.1639	120	509
68	hepatitis c	30	1	0.9017	0.3267	112	457
41	colonic neoplasms	28	1	0.7319	0.4766	109	400
76	keratitis, dendritic	28	1	0.9056	0.2472	119	367
117	pneumococcal infections	28	1	0.6335	0.0901	95	305
43	cumulative trauma disorders	27	1	0.7709	0.4677	112	384
77	kidney failure, chronic	27	1	0.9017	0.2276	102	378
122	protein deficiency	24	1	0.5978	0.1083	115	347
34	cardiomyopathy, dilated	23	1	0.6525	0.4706	113	393
95	multiple myeloma	23	1	0.8399	0.1265	106	308
15	ataxia telangiectasia	22	1	0.5217	0.3552	108	303
35	cardiomyopathy, hypertrophic	22	1	0.672	0.4751	105	334
108	ophthalmoplegic neuromuscular disorder with abnormal mitochondria	22	1	0.7319	0.0777	84	270
60	glucose metabolism disorders	20	1	0.8671	0.3985	86	222
113	periodic fever, familial, autosomal dominant	20	1	0.6525	0.0837	90	253
139	scleroderma, diffuse	20	1	0.5304	0.181	80	233
125	pulmonary disease, chronic obstructive	386	2	0.2343	0.1035	148	3871
14	asthma	381	2	0.0993	0.3641	148	4087
3	acute lung injury	299	2	0.0743	0.2748	146	2988
4	adenocarcinoma of lung	296	2	0.0759	0.2982	148	2672
134	respiratory distress syndrome, adult	257	2	0.1128	0.1665	148	2626
63	granulomatous disease, chronic	214	2	0.4162	0.2982	146	1739
50	emphysema	199	2	0.3451	0.4151	144	2090
45	cystic fibrosis	137	2	0.3035	0.4367	145	1755
110	pancreatitis	131	2	0.2577	0.1035	148	1561
54	eosinophilia	110	2	0.3928	0.3641	144	1213
146	tuberculosis	100	2	0.0759	0.2515	143	1073
71	idiopathic interstitial pneumonias	89	2	0.4114	0.2285	128	862
25	bronchiolitis obliterans	69	2	0.147	0.4151	127	693
126	pulmonary edema	63	2	0.2111	0.1067	126	667
7	alveolar echinococcosis	57	2	0.0807	0.3212	113	551
26	bronchitis	57	2	0.167	0.4273	119	615
24	bronchiolitis	55	2	0.1288	0.4004	129	639
132	radiation injuries	51	2	0.1288	0.1493	123	582
105	neutrophilia, hereditary	49	2	0.281	0.1067	122	573
27	bronchopulmonary dysplasia	45	2	0.1885	0.4367	109	447
81	lung diseases, obstructive	42	2	0.4035	0.2064	110	501
36	carrington syndrome	40	2	0.2343	0.4462	119	454
141	shock, septic	40	2	0.0807	0.2285	127	556
70	hermanski-pudlak syndrome	37	2	0.4162	0.2515	102	305
128	pulmonary emphysema	37	2	0.1885	0.113	111	457
55	epilepsy, partial, with variable foci	34	2	0.4035	0.3433	115	390
86	lymphoma	34	2	0.3928	0.1856	122	416
131	pulmonary heart disease	34	2	0.147	0.1345	115	420
53	endotoxemia	30	2	0.3792	0.3832	113	427
103	neurocognitive disorders	28	2	0.325	0.1224	118	367
11	anodontia	27	2	0.0885	0.3433	111	371
57	gastroesophageal reflux	27	2	0.4114	0.3212	111	365
91	mesothelioma	26	2	0.3792	0.1665	78	224
96	mycoses	25	2	0.3451	0.1345	111	325
136	rhinitis	25	2	0.0885	0.2064	108	297
135	respiratory hypersensitivity	24	2	0.0993	0.1856	90	304
23	bronchial diseases	23	2	0.1128	0.3832	95	316
28	carcinoid tumor	23	2	0.2111	0.443	94	282
104	neutrophil immunodeficiency syndrome	23	2	0.3035	0.113	99	288
129	pulmonary eosinophilia	23	2	0.167	0.1224	91	281
38	cerebral hemorrhage	22	2	0.281	0.443	94	280
37	cartilage diseases	21	2	0.2577	0.4462	81	215
49	digestive system neoplasms	21	2	0.325	0.4273	104	233
51	emphysematous cholecystitis	21	2	0.3632	0.4004	76	221
67	hepatitis	21	2	0.4178	0.2748	103	280
92	metaplasia	21	2	0.3632	0.1493	83	229
80	lung diseases, interstitial	915	3	0.5749	0.8091	148	5947
137	sarcoidosis	373	3	0.3321	0.6017	148	2321
140	scleroderma, systemic	324	3	0.3158	0.6208	148	2889
88	macrophage activation syndrome	202	3	0.6035	0.6899	146	1694
123	pulmonary alveolar proteinosis	101	3	0.3727	0.5723	130	829
10	aneurysm	99	3	0.3027	0.7877	144	1223
74	interstitial pneumonitis, desquamative, familial	90	3	0.5586	0.8282	116	595
83	lupus erythematosus, systemic	87	3	0.5881	0.7877	140	1065
46	dermatomyositis	78	3	0.4454	0.8751	114	608
8	alveolitis, extrinsic allergic	65	3	0.2872	0.74	126	678
48	diarrhea	61	3	0.4704	0.8732	141	797
115	pleural diseases	52	3	0.4949	0.5627	118	487
17	basal ganglia cerebrovascular disease	47	3	0.3321	0.8282	110	433
121	polymyositis	45	3	0.3959	0.5627	108	486
85	lymphocytosis	44	3	0.6035	0.74	115	492
102	nephritis, interstitial	44	3	0.5395	0.5854	119	536
19	blood coagulation disorders	37	3	0.3512	0.8445	128	534
99	myositis	37	3	0.5749	0.6208	98	395
148	vasculitis	37	3	0.2872	0.6899	119	441
21	bone marrow diseases	36	3	0.3959	0.8673	120	457
89	mastocytosis, systemic	35	3	0.5977	0.6655	112	377
145	tachycardia	35	3	0.2931	0.6655	107	375
116	pleural effusion	32	3	0.4704	0.5568	118	376
64	headache disorders, secondary	31	3	0.5181	0.8577	109	333
114	peritoneal neoplasms	31	3	0.5181	0.5723	105	320
44	cyclic neutropenia	28	3	0.4203	0.8732	112	323
143	sjogren&#39;s syndrome	28	3	0.3027	0.6423	100	295
12	arthralgia	26	3	0.3158	0.8091	97	323
127	pulmonary embolism	26	3	0.3512	0.5854	108	371
9	anemia	24	3	0.2931	0.7645	100	271
93	microvascular angina	24	3	0.5881	0.6423	106	312
6	alveolar capillary dysplasia	23	3	0.2852	0.715	96	265
87	lysosomal storage diseases	23	3	0.6055	0.715	113	299
62	granulomatosis with polyangiitis	22	3	0.4949	0.8673	77	224
69	hepatomegaly	22	3	0.5395	0.8445	98	250
20	blood platelet disorders	21	3	0.3727	0.8577	97	242
101	nephritis	21	3	0.5586	0.6017	104	328
84	lupus nephritis	20	3	0.5977	0.7645	109	303
119	pneumonia, bacterial	20	3	0.4454	0.5548	72	181
120	pneumonia, pneumocystis	20	3	0.4203	0.5568	99	240

## Sheet: net
疾病ID	连线疾病ID	连线强度
72	130	842
82	130	719
80	130	527
72	82	519
72	80	509
125	130	323
14	130	320
80	82	307
72	125	287
14	72	267
130	140	253
3	130	250
3	82	241
14	82	229
4	130	227
72	137	222
82	125	216
80	137	209
130	134	203
14	125	198
3	72	197
72	140	196
82	134	196
2	130	191
130	137	188
80	140	185
80	125	181
4	72	178
14	80	167
72	134	162
50	130	159
4	82	158
130	142	157
2	82	155
63	130	146
2	72	145
130	133	144
4	80	143
39	130	143
88	130	141
50	72	135
82	140	125
50	82	123
3	134	117
45	130	116
39	72	113
110	130	113
13	130	112
45	72	111
72	133	108
3	80	107
3	14	101
82	88	99
39	82	97
72	88	97
80	134	97
3	125	96
50	125	95
50	80	94
79	130	94
82	133	94
82	142	94
72	110	90
74	80	90
125	134	90
14	50	89
45	82	89
63	72	89
72	142	89
14	140	88
82	137	88
63	137	87
14	134	86
66	130	86
63	80	85
10	130	84
80	88	84
82	110	83
130	146	83
54	130	81
78	130	81
2	80	80
40	130	78
125	140	78
14	45	77
63	82	77
3	4	76
45	125	76
71	80	76
97	130	76
4	14	75
10	72	74
13	72	71
66	72	71
72	79	71
118	130	71
4	125	70
94	130	70
125	137	70
30	130	69
16	130	68
46	80	67
56	130	67
2	3	66
2	14	66
40	72	66
71	72	66
83	130	66
130	149	66
14	137	65
45	80	65
71	130	65
80	133	65
72	78	64
66	82	63
72	97	63
124	130	63
30	72	62
80	142	62
3	50	61
4	134	61
13	82	61
14	54	61
72	149	61
73	130	61
100	130	61
123	130	61
40	82	60
65	130	60
2	4	59
5	130	59
10	80	59
14	39	59
54	72	59
72	146	59
22	130	58
54	80	58
79	82	58
80	83	58
48	130	57
80	123	57
137	140	57
2	39	56
56	72	56
82	94	56
50	134	55
80	146	55
82	97	55
82	126	55
126	130	55
72	94	54
13	80	53
14	63	53
2	125	52
8	80	52
16	72	52
29	130	52
30	82	52
39	80	52
48	72	52
54	82	52
80	110	52
8	72	51
65	72	51
72	100	51
72	124	51
82	149	51
4	140	50
2	133	49
2	140	49
3	39	49
14	110	49
18	130	49
16	82	48
39	79	48
65	82	48
82	100	48
130	132	48
130	144	48
8	130	47
14	133	47
72	73	47
78	82	47
3	133	46
4	50	46
10	82	46
10	140	46
14	142	46
22	82	46
29	72	46
33	130	46
1	130	45
3	45	45
4	137	45
5	72	45
25	72	45
25	130	45
72	83	45
72	118	45
75	130	45
82	123	45
82	132	45
90	130	45
112	130	45
125	142	45
2	134	44
26	130	44
39	125	44
42	130	44
71	82	44
72	123	44
82	146	44
118	142	44
7	130	43
18	82	43
22	72	43
45	134	43
48	82	43
80	124	43
82	118	43
4	133	42
18	72	42
30	80	42
47	130	42
61	130	42
63	125	42
72	126	42
80	121	42
82	144	42
109	130	42
4	39	41
5	82	41
14	88	41
39	133	41
54	125	41
56	82	41
58	130	41
88	125	41
3	126	40
4	88	40
26	72	40
63	146	40
72	109	40
72	144	40
105	130	40
124	140	40
126	134	40
3	137	39
14	40	39
24	130	39
52	130	39
115	130	39
3	110	38
7	72	38
14	26	38
24	80	38
26	125	38
32	130	38
39	56	38
40	80	38
46	121	38
66	80	38
72	74	38
72	75	38
72	90	38
72	112	38
74	130	38
107	130	38
110	125	38
130	147	38
1	72	37
4	63	37
4	110	37
13	142	37
31	130	37
39	140	37
66	125	37
73	80	37
73	82	37
81	125	37
82	124	37
83	140	37
88	134	37
102	130	37
106	130	37
2	110	36
3	63	36
4	30	36
14	79	36
14	146	36
25	80	36
29	82	36
39	134	36
42	72	36
47	72	36
72	105	36
81	130	36
133	140	36
134	137	36
3	88	35
3	142	35
50	137	35
58	72	35
61	72	35
94	125	35
107	142	35
130	141	35
4	45	34
17	140	34
27	130	34
45	50	34
48	80	34
58	82	34
72	106	34
78	80	34
82	90	34
125	146	34
137	146	34
8	82	33
13	125	33
21	130	33
24	72	33
26	82	33
36	130	33
66	134	33
70	130	33
80	149	33
1	80	32
3	140	32
5	80	32
30	125	32
31	72	32
45	140	32
46	130	32
47	82	32
52	72	32
56	79	32
61	82	32
63	88	32
75	80	32
80	100	32
80	118	32
82	105	32
97	140	32
125	133	32
130	145	32
7	80	31
13	14	31
14	124	31
17	130	31
24	82	31
39	110	31
50	140	31
63	110	31
63	142	31
72	102	31
72	132	31
72	147	31
80	99	31
82	83	31
82	109	31
82	141	31
110	134	31
128	130	31
133	147	31
2	79	30
2	97	30
4	123	30
8	137	30
14	66	30
14	94	30
33	72	30
33	82	30
36	82	30
50	88	30
56	106	30
63	133	30
72	81	30
72	141	30
75	140	30
80	97	30
80	102	30
86	130	30
88	137	30
88	140	30
133	134	30
2	88	29
7	82	29
14	73	29
14	97	29
19	130	29
25	82	29
27	82	29
32	72	29
40	125	29
55	130	29
71	140	29
79	125	29
80	85	29
111	130	29
121	130	29
2	45	28
2	56	28
2	142	28
3	66	28
19	82	28
40	73	28
45	137	28
54	63	28
54	137	28
55	72	28
59	130	28
74	140	28
79	80	28
80	90	28
85	130	28
124	125	28
130	131	28
3	16	27
10	125	27
14	22	27
26	50	27
36	72	27
39	40	27
39	66	27
43	130	27
44	130	27
46	140	27
53	130	27
56	133	27
71	137	27
72	111	27
75	82	27
80	115	27
82	102	27
82	128	27
110	133	27
130	138	27
130	148	27
134	140	27
2	22	26
2	40	26
2	50	26
2	78	26
3	40	26
4	100	26
4	142	26
10	14	26
11	72	26
11	130	26
14	149	26
18	125	26
19	72	26
27	72	26
29	39	26
31	82	26
41	130	26
42	80	26
43	72	26
45	63	26
46	99	26
50	63	26
72	128	26
72	138	26
78	125	26
79	133	26
80	105	26
88	133	26
97	125	26
98	130	26
2	66	25
3	13	25
4	7	25
4	13	25
8	14	25
14	18	25
16	80	25
17	80	25
18	80	25
39	88	25
40	42	25
42	82	25
46	83	25
50	110	25
63	140	25
66	79	25
79	140	25
82	115	25
117	130	25
125	149	25
127	130	25
1	82	24
3	54	24
3	100	24
4	71	24
4	78	24
10	137	24
14	30	24
14	48	24
14	78	24
14	81	24
19	80	24
24	125	24
32	82	24
46	72	24
52	82	24
53	82	24
57	130	24
65	80	24
66	97	24
66	133	24
72	115	24
72	117	24
73	125	24
76	130	24
80	94	24
80	112	24
81	82	24
82	107	24
82	112	24
82	131	24
110	140	24
133	137	24
140	146	24
13	118	23
14	16	23
14	33	23
14	42	23
14	56	23
14	75	23
14	83	23
14	136	23
16	140	23
39	73	23
48	134	23
54	140	23
56	140	23
66	140	23
68	72	23
68	130	23
72	121	23
72	131	23
80	81	23
89	130	23
94	134	23
100	125	23
105	125	23
114	130	23
116	130	23
118	125	23
121	140	23
134	141	23
134	142	23
137	142	23
2	10	22
2	63	22
3	78	22
3	94	22
3	97	22
4	146	22
7	134	22
11	82	22
14	100	22
14	105	22
14	126	22
21	82	22
22	39	22
26	80	22
27	134	22
42	73	22
45	142	22
50	54	22
50	128	22
55	82	22
57	72	22
65	125	22
72	127	22
80	143	22
82	106	22
82	145	22
97	149	22
103	130	22
108	130	22
122	130	22
125	128	22
130	135	22
140	142	22
2	137	21
3	22	21
3	30	21
5	14	21
8	125	21
13	137	21
15	130	21
21	72	21
25	125	21
33	80	21
35	130	21
39	106	21
39	137	21
40	140	21
41	72	21
44	82	21
45	54	21
45	133	21
53	72	21
56	80	21
59	72	21
61	140	21
70	72	21
71	125	21
72	77	21
72	85	21
72	86	21
72	107	21
73	140	21
79	134	21
82	85	21
88	142	21
93	130	21
96	130	21
99	121	21
112	125	21
129	130	21
142	146	21
1	4	20
2	16	20
3	141	20
4	48	20
4	54	20
8	140	20
12	80	20
13	63	20
13	140	20
14	24	20
14	25	20
14	27	20
14	29	20
14	65	20
14	118	20
14	135	20
14	144	20
22	80	20
23	130	20
26	137	20
33	133	20
34	130	20
39	45	20
39	100	20
39	149	20
40	134	20
45	88	20
50	94	20
50	133	20
50	142	20
55	80	20
63	134	20
64	130	20
72	108	20
72	122	20
74	125	20
77	130	20
79	88	20
80	109	20
80	126	20
80	148	20
82	111	20
82	127	20
82	147	20
83	88	20
83	125	20
87	130	20
91	130	20
95	130	20
110	137	20
125	126	20
125	144	20
130	136	20
1	14	19
2	149	19
3	18	19
3	27	19
3	48	19
3	53	19
3	105	19
10	66	19
10	133	19
10	134	19
14	138	19
19	134	19
22	125	19
27	125	19
28	130	19
29	56	19
29	79	19
30	140	19
37	130	19
39	48	19
39	50	19
39	147	19
40	133	19
42	140	19
48	125	19
50	126	19
57	80	19
61	80	19
72	76	19
72	98	19
72	145	19
74	137	19
80	128	19
80	131	19
80	144	19
82	86	19
82	89	19
82	98	19
88	123	19
100	134	19
100	140	19
106	133	19
113	130	19
123	125	19
123	134	19
140	149	19
2	54	18
3	71	18
3	118	18
3	123	18
4	31	18
6	130	18
10	50	18
11	80	18
12	130	18
14	32	18
14	112	18
14	123	18
14	128	18
15	72	18
16	125	18
16	133	18
22	133	18
34	72	18
38	72	18
38	130	18
39	97	18
43	80	18
44	72	18
45	110	18
47	133	18
54	133	18
56	66	18
56	97	18
60	130	18
62	80	18
62	130	18
64	80	18
65	134	18
72	95	18
72	114	18
72	148	18
78	140	18
79	106	18
79	147	18
80	127	18
80	132	18
82	114	18
83	121	18
84	130	18
90	140	18
97	133	18
99	130	18
104	130	18
107	118	18
123	137	18
130	139	18
130	143	18
133	149	18
139	140	18
140	147	18
1	39	17
1	134	17
2	25	17
2	47	17
2	106	17
2	147	17
3	56	17
3	65	17
3	79	17
3	149	17
4	29	17
4	94	17
5	125	17
10	83	17
10	124	17
14	53	17
14	71	17
15	82	17
18	140	17
20	130	17
30	100	17
31	80	17
33	66	17
37	72	17
38	80	17
39	52	17
39	63	17
39	78	17
39	94	17
40	45	17
40	56	17
41	82	17
42	125	17
43	82	17
45	66	17
49	130	17
50	66	17
50	81	17
50	146	17
53	134	17
54	134	17
58	80	17
63	118	17
69	130	17
70	80	17
72	89	17
72	103	17
72	104	17
74	82	17
80	86	17
80	89	17
80	116	17
82	108	17
82	117	17
82	121	17
82	135	17
82	138	17
83	99	17
85	88	17
90	134	17
92	130	17
97	142	17
109	140	17
125	135	17
127	134	17
2	29	16
3	5	16
3	7	16
3	10	16
3	26	16
3	47	16
3	73	16
4	25	16
4	40	16
4	79	16
4	115	16
4	126	16
4	149	16
6	72	16
10	56	16
13	50	16
13	110	16
14	89	16
14	147	16
16	39	16
16	134	16
17	72	16
22	140	16
23	72	16
23	82	16
25	140	16
26	134	16
27	80	16
29	100	16
29	106	16
30	134	16
30	137	16
32	140	16
39	47	16
39	138	16
40	79	16
45	146	16
46	88	16
50	123	16
52	79	16
52	80	16
57	125	16
59	133	16
60	82	16
63	138	16
64	72	16
66	88	16
70	82	16
71	133	16
72	135	16
73	110	16
75	125	16
76	82	16
78	133	16
80	111	16
80	139	16
82	113	16
88	94	16
97	110	16
101	130	16
102	140	16
112	137	16
125	141	16
134	146	16
140	143	16
2	33	15
2	42	15
2	48	15
2	71	15
2	73	15
2	100	15
2	109	15
2	132	15
2	141	15
3	19	15
3	24	15
3	81	15
3	112	15
3	124	15
3	144	15
4	10	15
5	140	15
6	80	15
6	82	15
9	80	15
14	23	15
14	34	15
14	57	15
14	106	15
14	115	15
14	141	15
16	88	15
19	140	15
21	80	15
22	56	15
24	25	15
25	133	15
32	66	15
32	97	15
33	97	15
35	72	15
36	80	15
38	82	15
39	68	15
40	50	15
40	66	15
44	80	15
45	56	15
45	97	15
45	124	15
46	82	15
47	56	15
47	140	15
48	133	15
48	140	15
50	71	15
50	124	15
50	144	15
54	110	15
54	129	15
61	125	15
62	72	15
63	123	15
66	106	15
66	142	15
66	149	15
68	82	15
72	113	15
73	79	15
75	83	15
78	88	15
78	110	15
79	110	15
80	106	15
80	147	15
82	87	15
82	93	15
83	146	15
83	148	15
85	137	15
94	108	15
94	142	15
97	106	15
110	149	15
124	137	15
133	138	15
133	142	15
1	140	14
2	32	14
2	59	14
2	68	14
2	144	14
3	29	14
3	58	14
3	128	14
3	132	14
3	146	14
4	16	14
4	24	14
4	83	14
4	124	14
4	132	14
5	134	14
7	110	14
8	63	14
10	79	14
10	110	14
12	83	14
13	39	14
13	133	14
13	134	14
13	146	14
14	21	14
14	28	14
14	36	14
14	47	14
14	90	14
18	134	14
22	134	14
23	125	14
24	50	14
24	134	14
28	72	14
28	82	14
29	80	14
29	125	14
30	31	14
30	132	14
30	142	14
32	39	14
33	134	14
33	140	14
34	82	14
35	82	14
39	42	14
39	58	14
39	83	14
39	124	14
40	97	14
40	106	14
40	110	14
45	79	14
48	50	14
50	51	14
50	79	14
50	100	14
51	130	14
56	73	14
56	149	14
63	78	14
65	79	14
65	88	14
66	110	14
66	127	14
67	130	14
71	110	14
72	84	14
72	93	14
72	136	14
72	139	14
73	83	14
73	134	14
78	79	14
79	97	14
79	142	14
79	149	14
80	96	14
80	107	14
80	141	14
82	95	14
82	104	14
82	116	14
82	122	14
82	136	14
83	137	14
88	99	14
88	146	14
90	100	14
97	134	14
99	140	14
100	110	14
109	125	14
115	125	14
118	137	14
119	130	14
124	134	14
1	2	13
2	13	13
2	118	13
2	146	13
4	36	13
4	66	13
4	90	13
4	97	13
4	109	13
4	118	13
4	131	13
4	144	13
5	39	13
7	71	13
9	130	13
10	39	13
10	71	13
10	97	13
10	106	13
13	94	13
14	43	13
14	52	13
14	68	13
14	74	13
14	98	13
14	109	13
14	129	13
14	131	13
14	132	13
21	140	13
27	45	13
28	80	13
29	109	13
29	133	13
30	45	13
31	100	13
31	125	13
32	80	13
32	125	13
32	133	13
32	149	13
33	39	13
33	125	13
39	65	13
39	71	13
39	90	13
39	112	13
40	41	13
42	137	13
45	81	13
45	100	13
47	80	13
49	72	13
51	72	13
51	82	13
52	56	13
54	88	13
54	105	13
54	123	13
54	146	13
56	134	13
56	138	13
56	147	13
58	100	13
58	125	13
59	80	13
63	79	13
64	82	13
66	124	13
72	96	13
72	129	13
75	124	13
76	80	13
77	82	13
80	84	13
80	92	13
80	98	13
80	103	13
80	117	13
80	119	13
80	120	13
80	122	13
80	129	13
80	145	13
82	92	13
82	129	13
82	148	13
83	143	13
100	133	13
102	125	13
102	134	13
105	140	13
106	140	13
117	125	13
120	130	13
123	142	13
125	127	13
125	136	13
134	149	13
1	3	12
1	125	12
2	7	12
2	24	12
2	30	12
2	52	12
2	86	12
2	105	12
2	124	12
3	36	12
3	138	12
4	26	12
4	33	12
4	73	12
5	142	12
7	125	12
8	134	12
10	46	12
11	14	12
13	45	12
13	115	12
14	35	12
14	44	12
14	61	12
14	76	12
14	102	12
14	107	12
16	65	12
18	45	12
20	72	12
20	80	12
21	39	12
22	45	12
22	79	12
23	80	12
25	134	12
25	137	12
26	45	12
27	50	12
28	125	12
29	30	12
29	68	12
29	140	12
30	111	12
31	140	12
32	79	12
37	80	12
39	54	12
40	88	12
40	137	12
42	66	12
42	83	12
42	106	12
42	133	12
45	105	12
45	149	12
47	97	12
50	78	12
50	141	12
52	140	12
53	125	12
56	68	12
56	125	12
57	82	12
59	82	12
60	72	12
63	94	12
65	140	12
66	137	12
67	72	12
68	79	12
68	140	12
71	74	12
73	97	12
73	133	12
73	137	12
77	80	12
77	133	12
78	83	12
79	94	12
79	100	12
80	104	12
81	137	12
82	91	12
82	103	12
82	139	12
85	134	12
86	125	12
87	142	12
88	97	12
88	145	12
88	149	12
90	125	12
96	125	12
97	147	12
98	149	12
100	109	12
105	134	12
110	142	12
110	146	12
110	147	12
125	129	12
128	134	12
142	149	12
1	45	11
1	56	11
1	88	11
1	137	11
2	5	11
2	19	11
2	27	11
2	31	11
2	65	11
2	81	11
2	83	11
2	90	11
2	98	11
2	123	11
2	126	11
2	138	11
3	33	11
3	102	11
3	115	11
4	5	11
4	19	11
4	22	11
4	55	11
4	58	11
4	86	11
7	14	11
8	50	11
10	47	11
10	65	11
10	149	11
12	82	11
13	54	11
13	91	11
14	17	11
14	31	11
14	41	11
14	55	11
14	64	11
14	70	11
14	85	11
14	96	11
16	50	11
17	82	11
18	133	11
24	39	11
24	140	11
26	63	11
26	146	11
29	40	11
29	42	11
29	45	11
29	50	11
29	66	11
29	111	11
29	134	11
30	39	11
30	90	11
30	109	11
31	90	11
33	79	11
34	39	11
36	125	11
36	132	11
39	81	11
39	109	11
39	141	11
39	142	11
39	144	11
39	146	11
40	63	11
40	78	11
40	83	11
40	149	11
41	73	11
41	80	11
41	125	11
42	50	11
42	56	11
42	97	11
43	133	11
45	73	11
45	78	11
45	94	11
45	106	11
45	118	11
45	123	11
45	147	11
46	102	11
46	137	11
46	143	11
47	79	11
47	110	11
47	147	11
49	80	11
50	65	11
50	135	11
51	80	11
51	125	11
52	106	11
52	133	11
54	81	11
54	142	11
55	125	11
56	63	11
56	78	11
56	109	11
56	110	11
56	112	11
56	142	11
59	147	11
61	75	11
63	83	11
63	85	11
63	96	11
65	94	11
66	77	11
66	102	11
66	147	11
67	80	11
69	80	11
71	134	11
72	87	11
72	92	11
72	99	11
72	120	11
73	75	11
78	137	11
79	83	11
79	109	11
80	93	11
81	134	11
82	96	11
83	84	11
83	134	11
83	142	11
88	121	11
89	125	11
90	142	11
97	98	11
97	124	11
97	137	11
98	133	11
98	140	11
106	110	11
106	149	11
109	137	11
112	146	11
118	140	11
124	133	11
125	131	11
125	132	11
132	134	11
132	140	11
134	144	11
1	50	10
1	66	10
1	79	10
2	11	10
2	36	10
2	53	10
2	58	10
2	115	10
3	25	10
3	75	10
3	107	10
3	127	10
3	135	10
4	6	10
4	56	10
4	70	10
4	116	10
5	65	10
6	137	10
8	142	10
10	29	10
10	78	10
10	88	10
11	125	10
12	88	10
13	88	10
14	46	10
14	58	10
14	67	10
14	93	10
14	104	10
14	145	10
16	56	10
16	126	10
16	147	10
17	75	10
17	124	10
18	137	10
19	50	10
19	66	10
19	125	10
20	82	10
22	40	10
22	110	10
22	147	10
24	63	10
25	50	10
25	54	10
25	88	10
26	54	10
29	97	10
29	147	10
30	50	10
30	63	10
30	78	10
30	112	10
31	50	10
32	33	10
33	83	10
34	80	10
36	134	10
37	82	10
37	125	10
38	125	10
39	43	10
39	59	10
39	67	10
39	85	10
39	86	10
39	98	10
42	79	10
43	125	10
45	109	10
45	128	10
46	90	10
47	66	10
47	106	10
48	66	10
48	137	10
49	82	10
50	73	10
50	83	10
50	97	10
50	109	10
52	125	10
53	141	10
54	71	10
55	133	10
56	59	10
56	65	10
56	100	10
56	137	10
58	110	10
58	142	10
59	140	10
61	134	10
63	112	10
65	66	10
66	73	10
66	94	10
66	98	10
66	100	10
66	126	10
68	106	10
68	133	10
69	72	10
69	82	10
70	125	10
72	91	10
72	101	10
72	119	10
72	143	10
74	83	10
75	97	10
75	134	10
76	125	10
78	124	10
78	134	10
78	142	10
78	146	10
82	99	10
82	120	10
83	85	10
83	102	10
83	123	10
88	110	10
88	118	10
94	140	10
95	125	10
96	146	10
100	111	10
100	149	10
104	125	10
105	133	10
106	109	10
107	125	10
108	125	10
109	110	10
109	133	10
109	142	10
109	149	10
110	138	10
111	125	10
111	140	10
117	134	10
122	125	10
131	134	10
132	133	10
140	144	10
147	149	10
1	10	9
1	123	9
2	21	9
2	43	9
2	61	9
2	74	9
3	11	9
3	31	9
3	104	9
3	106	9
3	109	9
3	111	9
3	117	9
3	145	9
4	21	9
4	57	9
4	74	9
4	91	9
4	105	9
4	111	9
4	128	9
4	141	9
4	145	9
5	137	9
7	63	9
7	133	9
8	13	9
8	75	9
10	17	9
10	22	9
10	40	9
10	42	9
10	45	9
10	48	9
10	59	9
10	63	9
10	102	9
11	140	9
12	72	9
12	140	9
13	79	9
13	107	9
13	123	9
14	19	9
14	91	9
14	92	9
14	103	9
14	114	9
16	40	9
16	63	9
16	97	9
17	83	9
18	50	9
18	142	9
19	39	9
19	88	9
22	50	9
22	97	9
22	106	9
23	110	9
24	45	9
24	110	9
24	133	9
25	71	9
29	31	9
29	32	9
29	52	9
29	88	9
30	97	9
30	133	9
31	78	9
31	134	9
32	40	9
32	42	9
32	106	9
33	40	9
33	149	9
34	125	9
34	133	9
34	140	9
35	39	9
35	80	9
35	125	9
39	53	9
39	75	9
39	105	9
39	111	9
39	123	9
39	148	9
40	52	9
40	114	9
40	142	9
42	110	9
45	52	9
45	65	9
45	77	9
45	112	9
45	136	9
47	65	9
47	78	9
47	125	9
48	78	9
48	79	9
48	88	9
50	53	9
50	58	9
50	75	9
50	105	9
50	131	9
53	110	9
54	73	9
54	115	9
55	110	9
56	75	9
57	140	9
58	79	9
58	90	9
58	134	9
58	140	9
59	79	9
59	97	9
60	80	9
63	65	9
63	66	9
63	100	9
63	115	9
63	147	9
66	109	9
68	97	9
71	88	9
73	78	9
73	100	9
73	106	9
73	109	9
74	88	9
75	79	9
75	133	9
75	137	9
77	140	9
78	97	9
79	124	9
80	87	9
80	114	9
82	84	9
82	101	9
82	119	9
83	133	9
85	148	9
88	102	9
88	141	9
88	148	9
89	134	9
90	133	9
91	115	9
94	149	9
95	140	9
97	109	9
97	144	9
98	147	9
100	137	9
100	147	9
103	125	9
106	147	9
110	126	9
110	144	9
111	133	9
112	140	9
115	133	9
116	134	9
118	133	9
118	146	9
121	137	9
125	145	9
125	147	9
126	142	9
128	137	9
133	141	9
133	144	9
133	146	9
138	140	9
1	65	8
1	106	8
1	133	8
1	146	8
2	23	8
2	34	8
2	55	8
2	94	8
2	101	8
2	103	8
2	107	8
2	111	8
2	131	8
3	55	8
3	61	8
3	70	8
3	83	8
3	90	8
3	91	8
3	103	8
4	11	8
4	27	8
4	35	8
4	38	8
4	44	8
4	69	8
4	98	8
4	117	8
4	127	8
4	147	8
5	40	8
5	50	8
5	79	8
5	88	8
5	146	8
7	39	8
7	137	8
8	45	8
8	54	8
8	102	8
9	12	8
9	72	8
10	16	8
10	19	8
10	33	8
10	61	8
10	73	8
10	75	8
10	93	8
10	100	8
10	109	8
12	46	8
12	64	8
12	99	8
12	148	8
13	22	8
13	25	8
13	30	8
13	83	8
13	149	8
14	37	8
14	38	8
14	51	8
14	95	8
14	108	8
14	116	8
14	117	8
14	121	8
14	122	8
15	125	8
15	140	8
16	75	8
16	79	8
16	100	8
16	110	8
16	137	8
17	125	8
18	88	8
19	85	8
19	137	8
21	125	8
22	29	8
22	47	8
22	54	8
22	63	8
22	65	8
22	66	8
22	73	8
22	100	8
23	45	8
23	50	8
23	54	8
24	128	8
25	39	8
25	45	8
25	63	8
25	105	8
25	110	8
26	81	8
26	88	8
26	140	8
28	54	8
28	110	8
29	65	8
29	73	8
29	90	8
29	110	8
29	142	8
29	149	8
30	58	8
30	88	8
31	109	8
31	111	8
31	142	8
32	45	8
32	56	8
32	78	8
32	110	8
33	47	8
33	56	8
33	137	8
33	147	8
35	66	8
35	124	8
35	140	8
36	110	8
36	133	8
39	69	8
39	77	8
39	126	8
40	75	8
40	141	8
40	144	8
41	42	8
42	75	8
42	88	8
42	134	8
44	125	8
45	47	8
45	58	8
45	75	8
45	83	8
46	74	8
46	85	8
46	134	8
46	148	8
47	88	8
47	149	8
48	56	8
48	110	8
48	115	8
48	126	8
50	57	8
50	69	8
50	74	8
50	112	8
50	118	8
50	132	8
50	149	8
52	66	8
52	97	8
52	134	8
54	78	8
54	85	8
56	88	8
58	133	8
59	101	8
59	106	8
59	110	8
59	149	8
61	149	8
62	137	8
62	140	8
63	71	8
63	74	8
63	87	8
63	97	8
63	103	8
63	124	8
64	125	8
65	78	8
65	100	8
65	124	8
65	142	8
66	75	8
66	118	8
67	82	8
68	80	8
72	116	8
73	88	8
73	124	8
73	149	8
75	142	8
78	90	8
78	100	8
78	112	8
78	115	8
79	98	8
79	132	8
79	141	8
80	95	8
80	108	8
80	136	8
81	140	8
83	98	8
85	99	8
85	140	8
86	110	8
87	88	8
88	90	8
88	144	8
89	137	8
89	140	8
93	125	8
93	134	8
94	100	8
94	110	8
94	112	8
94	133	8
94	137	8
98	125	8
101	133	8
[truncated: 6,887 more rows]
